# Supplementary material for: Revealing the key antioxidant compounds and potential action mechanisms of Pinus koraiensis pinecones by integrating UPLC-MS- based widely targeted metabolomics, network pharmacology, and molecular docking approaches
Source: Research Square preprint supplement (doi:10.21203/rs.3.rs-6712981/v1), 2025-06-25
Supplement: Supplementary file 1 [file 068513cbfebd818a000d09d7.docx]

**supplementary Table S6. Interactions between compounds and target proteins.**

| Name | Interaction type | Residue | AA | Distance | Donor Atom | Acceptor Atom |
| --- | --- | --- | --- | --- | --- | --- |
| SRC ~Kaempferol-3-O-(4''-O-p-Coumaroyl)rhamnoside | Hydrophobic Interactions | 155B | LYS | 3.68 | 15 | 1193 |
| Hydrogen Bonds | 102C | GLU | 3.56 | 2117 [N3] | 37 [O3] |
| 147B | GLN | 2.68 | 36 [O3] | 1107 [O2] |
| 155B | LYS | 2.94 | 1189 [Nam] | 31 [O3] |
| 158A | ARG | 2.58 | 35 [O3] | 193 [Ng+] |
| 158A | ARG | 2.49 | 193 [Ng+] | 35 [O3] |
| 158A | ARG | 1.80 | 194 [Ng+] | 39 [O3] |
| 181A | GLU | 3.48 | 430 [Nam] | 42 [O3] |
| 182A | THR | 2.06 | 440 [Nam] | 42 [O3] |
| 183A | THR | 2.15 | 449 [Nam] | 42 [O3] |
| 204A | HIS | 2.47 | 627 [Nam] | 38 [O3] |
| 204A | HIS | 2.28 | 38 [O3] | 630 [O2] |
| 204A | HIS | 2.64 | 39 [O3] | 630 [O2] |
| π-Cation Interactions | 198A | LYS | 4.41 | Aromatic | 10, 11, 12, 13, 14, 15 |
| 206A | LYS | 3.71 | Aromatic | 25, 26, 27, 28, 29, 30 |
| SRC~ Isolugrandoside | Hydrophobic Interactions | 155B | LYS | 3.74 | 23 | 1200 |
| 206A | LYS | 3.57 | 16 | 665 |
| 208A | ARG | 3.65 | 19 | 688 |
| Hydrogen Bonds | 102C | GLU | 1.85 | 166.33 | 2124 [N3] |
| 102C | GLU | 3.47 | 121.78 | 41 [O3] |
| 158A | ARG | 2.41 | 134.30 | 200 [Ng+] |
| 158A | ARG | 2.50 | 127.60 | 44 [O3] |
| 158A | ARG | 2.58 | 101.16 | 201 [Ng+] |
| 163B | ARG | 3.04 | 161.09 | 1291 [Ng+] |
| 178A | ARG | 2.61 | 117.70 | 411 [Ng+] |
| 178A | ARG | 2.48 | 119.43 | 412 [Ng+] |
| 178A | ARG | 2.39 | 141.49 | 33 [O3] |
| 180A | SER | 3.08 | 158.60 | 35 [O3] |
| 181A | GLU | 2.94 | 150.29 | 437 [Nam] |
| 182A | THR | 2.28 | 128.08 | 447 [Nam] |
| 183A | THR | 3.34 | 126.60 | 456 [Nam] |
| 206A | LYS | 3.31 | 114.83 | 661 [Nam] |
| 206A | LYS | 2.28 | 146.89 | 38 [O3] |
| 206A | LYS | 2.98 | 101.96 | 669 [N3+] |
| 217A | ILE | 2.56 | 105.70 | 39 [O3] |
| Salt Bridges | 158A | ARG | 3.79 | Carboxylate | 31, 32 |
| 206A | LYS | 4.41 | Carboxylate | 37, 30 |
| 206A | LYS | 5.40 | Carboxylate | 31, 32 |
| TNF~ Deoxyerythrolaccin | Hydrophobic Interactions | 102A | GLN | 3.56 | 3 | 938 |
| 102B | GLN | 3.58 | 10 | 2387 |
| 102C | GLN | 3.69 | 15 | 3837 |
| 104A | GLU | 3.41 | 15 | 967 |
| Hydrogen Bonds | 101A | CYS | 3.07 | 926 [Nam] | 16 [O2] |
| 102A | GLN | 3.18 | 933 [Nam] | 18 [O3] |
| CTNNB1 ~ Rubiprasin A | Hydrophobic Interactions | 355C | PRO | 3.59 | 18 | 6235 |
| 391C | ALA | 3.70 | 14 | 6556 |
| 394C | LYS | 3.39 | 21 | 6577 |
| 491A | LEU | 3.70 | 32 | 3278 |
| 492A | PRO | 3.95 | 32 | 3288 |
| 526A | PRO | 3.43 | 19 | 3599 |
| 530A | GLN | 3.62 | 32 | 3643 |
| Hydrogen Bonds | 391C | ALA | 2.55 | 37 [O3] | 6555 [O2] |
| 486A | ARG | 2.03 | 3223 [Ng+] | 34 [O2] |
| 486A | ARG | 2.54 | 3226 [Ng+] | 34 [O2] |
| CTNNB1 ~ Kaempferol-3-O-(4''-O-p-Coumaroyl)rhamnoside | Hydrophobic Interactions | 355C | PRO | 3.32 | 11 | 6244 |
| 394C | LYS | 3.83 | 27 | 6586 |
| 491A | LEU | 3.71 | 14 | 3289 |
| 526A | PRO | 3.80 | 15 | 3608 |
| Hydrogen Bonds | 20D | ARG | 2.26 | 9109 [Ng+] | 35 [O3] |
| 390C | ASP | 3.36 | 35 [O3] | 6555 [O2] |
| 391C | ALA | 2.02 | 38 [O3] | 6564 [O2] |
| 486A | ARG | 2.10 | 34 [O3] | 3228 [O2] |
| 490A | GLY | 3.25 | 3278 [Nam] | 34 [O3] |
| 491A | LEU | 2.35 | 3283 [Nam] | 34 [O3] |
| Salt Bridges | 486A | ARG | 4.26 | Carboxylate | 41, 40 |
| CASP3 ~ Rubiprasin A. | Hydrophobic Interactions | 204B | TYR | 3.72 | 17 | 1656 |
| 206B | TRP | 3.96 | 19 | 1681 |
| 206B | TRP | 3.77 | 17 | 1685 |
| 256B | PHE | 3.88 | 17 | 2195 |
| Hydrogen Bonds | 209B | SER | 1.80 | 1716 [Nam] | 34 [O2] |
| 250B | PHE | 2.67 | 37 [O3] | 2135 [O2] |
| Salt Bridges | 207B | ARG | 4.43 | Carboxylate | 35, 36 |
