# Supplementary material for: Revealing the key antioxidant compounds and potential action mechanisms of Pinus koraiensis pinecones by integrating UPLC-MS- based widely targeted metabolomics, network pharmacology, and molecular docking approaches
Source: Research Square preprint supplement (doi:10.21203/rs.3.rs-6712981/v1), 2025-06-25
Supplement: Supplementary file 2 [file 0dc5936bbe33df2f4d6b6beb.xlsx]

## Sheet: Sheet1
The common differential metabolites among the three provenance groups.
Index	Compounds	Class I	Class II	Formula	Level	CAS	P-LSH-1	P-LSH-2	P-LSH-3	P-DL-1	P-DL-2	P-DL-3	P-DFH-1	P-DFH-2	P-DFH-3	cpd_ID	kegg_map	mw_cpd_ID	mw_map
Hasp013107	Saurufuran B	Terpenoids	Ditepenoids	C20H28O3	3	425368-87-2	747888	171064	740091	2.81399e+06	2.5023e+06	2.4878e+06	34212.8	34212.8	34212.8	-	-	-	-
Wadp008128	3-Oxo-9beta-pimara-7,15-dien-19,6beta-olide	Terpenoids	Ditepenoids	C20H26O3	3	-	8214.12	8214.12	8214.12	107190	104307	70321	43893.3	54253.2	41070.6	-	-	-	-
Wbkn005292	[(1S,2S,3S,7R,9R,13S,14R,15R,17S)-3,15-diacetyloxy-7-hydroxy-2,6,14-trimethyl-4,11,16-trioxo-10-oxatetracyclo[7.7.1.02,7.013,17]heptadec-5-en-17-yl]methylacetate	Terpenoids	Ditepenoids	C26H32O11	3	-	6.87581e+06	6.02745e+06	1.0765e+07	2.23088e+07	1.68095e+07	1.89173e+07	3.98303e+06	2.00389e+06	1.8125e+06	-	-	-	-
Lmjp007881	Artemisinate*	Terpenoids	Sesquiterpenoids	C15H22O2	3	80286-58-4	214697	220704	185770	696162	757189	557828	37154	37154	37154	C20309	-	C20309	-
Sahp003947	Staphylionoside A	Terpenoids	Sesquiterpenoids	C19H30O8	3	-	493700	570874	684472	41259.7	41259.7	41259.7	235042	206298	322199	-	-	-	-
Lhcp090202	3-(Acetyloxy)-13,15-dihydroxyoleanan-12-one (Rubiprasin A)	Terpenoids	Triterpene	C32H52O5	3	125263-65-2	8786.74	8786.74	8786.74	150288	135881	134217	43933.7	59456.5	53950	-	-	-	-
MWStz735	Ganoderal A	Terpenoids	Triterpene	C30H44O2	3	104700-98-3	546856	490962	595066	33084.9	33084.9	33084.9	224960	293722	165425	-	-	-	-
Zbqn008252	Rubianol-g	Terpenoids	Triterpene	C30H46O4	3	-	7.57778e+06	7.67361e+06	6.93428e+06	1.5625e+07	1.4712e+07	1.47873e+07	2.12083e+06	2.20926e+06	609306	-	-	-	-
Lsj214143	Soranjidiol; 1,6-Dihydroxy-2-methyl-9,10-anthraquinone	Quinones	Anthraquinone	C15H10O4	2	518-73-0	2.00147e+06	2.44774e+06	2.11915e+06	8.73391e+06	8.99307e+06	9.172e+06	652508	586367	512702	-	-	-	-
Ymln008632	Deoxyerythrolaccin	Quinones	Anthraquinone	C15H10O5	3	18499-83-7	23430.8	23430.8	23430.8	612864	589510	639562	117154	131836	121022	-	-	-	-
mws0179	Chlorogenic acid methyl ester	Phenolic acids	Phenolic acids	C17H20O9	2	29708-87-0	1.84748e+06	1.67151e+06	1.64925e+06	129679	174815	108552	398827	404337	429716	-	-	-	-
Labn002716	galloyl acetyl glucoside	Phenolic acids	Phenolic acids	C15H18O11	3	-	484552	442412	534212	1.32665e+06	1.40129e+06	1.40106e+06	29048.2	32426.3	25060.1	-	-	CM020544	MetMap155
pmn001421	3-O-p-Coumaroylquinic acid	Phenolic acids	Phenolic acids	C16H18O8	1	87099-71-6	1.88409e+07	1.80368e+07	1.50348e+07	1.38881e+06	1.26668e+06	1.26215e+06	8.58349e+06	6.56326e+06	6.99508e+06	-	-	-	-
Smln008909	Aloebarbendol	Phenolic acids	Phenolic acids	C15H14O4	3	194145-93-2	321392	344088	387485	1.4065e+06	1.52467e+06	1.46502e+06	121177	124274	190165	-	-	-	-
mws2108	Cryptochlorogenic acid (4-O-Caffeoylquinic acid)*	Phenolic acids	Phenolic acids	C16H18O9	1	905-99-7	596731	1.00879e+06	619539	160081	124809	117299	217326	300505	387517	-	-	-	-
pma6460	4-p-Coumaroylquinic acid	Phenolic acids	Phenolic acids	C16H18O8	3	93451-44-6	139851	136740	127398	17451.8	16898.5	12126.1	49786.5	65408.2	31408.7	C10441	-	C10441	-
Sakn004920	Isolugrandoside	Phenolic acids	Phenolic acids	C29H36O16	3	-	73238.2	80443.7	36790.8	240362	243188	378452	117740	166948	140048	-	-	-	-
Lmsn004090	1-O-Galloyl-3-O-p-Coumaroyl-β-D-glucose	Phenolic acids	Phenolic acids	C22H22O12	3	-	1507.63	1507.63	1507.63	28708.7	17965.8	32262.8	17661	8781.74	10742.5	-	-	CM020568	MetMap155
Lmln001195	Picein	Phenolic acids	Phenolic acids	C14H18O7	1	530-14-3	109047	65373	72297.1	30605.4	36905.8	15219	3043.81	3043.81	3043.81	C10720	-	C10720	-
Labn004065	4-Hydroxybenzoyl acetyl glucoside	Phenolic acids	Phenolic acids	C15H18O9	3	-	60583.7	60021.7	70201.4	131189	150635	156358	5451.62	5451.62	5451.62	-	-	CM020471	MetMap157
Layp007667	Bauhinoxepin I	Others	Alcohol compounds	C16H14O5	3	-	4.86783e+06	5.9639e+06	5.09833e+06	2.20928e+06	2.33315e+06	2.25277e+06	581521	413109	579605	-	-	-	-
Wamxn00739	Methyl Alpha-D-Galactopyranoside	Others	Alcohol compounds	C7H14O6	2	-	4.35007e+06	4.12043e+06	5.63968e+06	1.0784e+07	1.16025e+07	1.21789e+07	2.55875e+07	2.61236e+07	2.31534e+07	-	-	-	-
Lcfn121126	4-Methylene-2-octyl-5-oxotetrahydrofuran-3-carboxylicacid(C75)	Others	Lactones	C14H22O4	2	218137-86-1	3.6907e+06	5.04238e+06	4.57951e+06	1.9742e+07	1.95574e+07	2.13374e+07	1.49558e+06	1.47973e+06	1.31175e+06	-	-	-	-
Lmmn006306	Machilusolide D	Others	Lactones	C18H30O3	3	-	655719	680200	884184	58508.6	58508.6	58508.6	314670	328422	292543	-	-	-	-
Lhmp101304	Ranunculinin glucoside*	Others	Others	C11H16O8	3	-	456345	493994	418233	1.46686e+06	1.38994e+06	1.38901e+06	47471.9	47471.9	47471.9	-	-	-	-
HX1346	ranunculin*	Others	Others	C11H16O8	3	-	456345	493994	418233	1.46686e+06	1.38994e+06	1.38901e+06	47471.9	47471.9	47471.9	C08512	-	C08512	-
Wazcp04835	Phycoerythrobilin	Others	Others	C33H38N4O6	2	18097-67-1	201169	265156	314814	2.23631e+06	1.75686e+06	1.82237e+06	476997	852375	681886	C05912	ko00860,ko01110	C05912	-
Zazn006864	Nor-toralactone	Others	Others	C14H10O5	3	-	1.59402e+06	1.65603e+06	1.7442e+06	5.65007e+06	5.90951e+06	6.15028e+06	750401	717986	895649	-	-	-	-
Wcfn003424	Coumaroyl Quinic Acid	Others	Others	C16H18O8	3	-	1.88409e+07	1.80368e+07	1.50348e+07	1.38881e+06	1.26668e+06	1.26215e+06	8.58349e+06	6.56326e+06	6.99508e+06	-	-	-	-
pme0534	D-Gluconic acid	Others	Saccharides	C6H12O7	1	526-95-4	190063	248247	229255	452581	465470	456624	1.44355e+06	1.47281e+06	1.50346e+06	C00257	ko00030,ko01100,ko01110,ko01200	C00257	-
pme2435	L-Fucose	Others	Saccharides	C6H12O5	3	-	200021	188636	187718	434603	408646	311193	816031	730840	862732	C01019	ko00051,ko00520,ko01100,ko01250	C01019	-
Lmsn000954	Dambonitol	Others	Saccharides	C8H16O6	1	523-94-4	574532	529861	520344	3.85376e+06	4.07426e+06	3.98979e+06	44219.3	44219.3	44219.3	-	-	-	-
Zjtp092402	3,4'-dihydroxy-5-methoxybibenzyl	Others	Stilbene	C15H16O3	3	67884-29-1	432077	439533	289542	1.61652e+06	1.64546e+06	1.6931e+06	44075.8	76409.8	122565	-	-	CM020261	MetMap152
Zjbn102516	3,3'-Dihydroxy-5-methoxybibenzyl	Others	Stilbene	C15H16O3	1	-	693185	875755	845998	3.63109e+06	3.31063e+06	3.74355e+06	242601	222462	253179	-	-	-	-
Zapn006835	Pinosylvin	Others	Stilbene	C14H12O2	1	22139-77-1	4.70805e+06	5.9607e+06	6.18598e+06	1.89015e+07	1.86904e+07	1.93945e+07	2.16587e+06	2.30711e+06	2.89921e+06	C01745	ko00945,ko01110	C01745	-
mws0021	Resveratrol	Others	Stilbene	C14H12O3	3	501-36-0	216565	293674	273095	597914	567761	553970	96983.7	98358.6	114951	C03582	ko00945,ko01110	C03582	MetMap152
Wbtp004815	5-hydroxy-6,8-dimethoxy-2,3-dimethylbenzo[g]chromen-4-one	Others	Xanthone	C17H16O5	3	-	4.62888e+06	3.56202e+06	5.91258e+06	1.10626e+07	1.46394e+07	9.08409e+06	712403	712403	712403	-	-	-	-
pme2710	Dihydrojasmonic acid	Organic acids	Organic acids	C12H20O3	3	3572-64-3	1.98849e+06	2.54215e+06	2.60049e+06	7.74187e+06	7.93561e+06	7.97455e+06	879656	920909	1.15453e+06	-	-	-	-
Lmgn002184	2-Oxoheptanedionic acid	Organic acids	Organic acids	C7H10O5	3	17126-90-8	131614	94929.8	136428	7581.89	7581.89	7581.89	58812.6	37909.5	41663.8	C16588	ko01100,ko01210,ko01240	C16588	-
Wahsn10880	1-O-Feruloyl 9,10-Dihydroxypalmitic acid	Lipids	Free fatty acids	C26H40O7	3	-	19901.4	22974.3	20698.7	56305.4	55558.8	55477.7	112404	112690	118184	-	-	-	-
Lmyn005812	Gingerglycolipid A	Lipids	Glycerol ester	C33H56O14	2	145937-22-0	1.66511e+06	1.78805e+06	1.28296e+06	464748	1.0678e+06	556540	275639	230115	232691	-	-	-	-
Lmhp008233	LysoPE 18:4	Lipids	LPE	C23H40NO7P	3	-	23293.5	67008.8	43694.9	1123.29	1123.29	1123.29	14430.3	12632.2	16448	-	-	-	-
mws4168	Praeruptorin A	Lignans and Coumarins	Coumarins	C21H22O7	3	73069-25-7	2368.24	2368.24	2368.24	88436.6	163796	171305	507521	369775	309615	-	-	-	-
Zmdn005358	Vladinol D	Lignans and Coumarins	Lignans	C20H22O7	3	-	456701	613658	456813	3.39155e+06	3.07133e+06	3.32053e+06	1.05023e+06	895101	1.46365e+06	-	-	-	-
Wahsn05900	4-(3-hydroxy-2-(4-(3-hydroxyprop-1-en-1-yl)phenoxy)propyl)-2-methoxyphenol glucoside	Lignans and Coumarins	Lignans	C25H32O10	1	-	552720	410446	350513	96762.4	101807	111019	995356	1.08673e+06	918253	-	-	-	-
pmn001643	Isolariciresinol-9'-O-rhamnoside (Aviculin)	Lignans and Coumarins	Lignans	C26H34O10	3	156765-33-2	146818	162133	145038	1.3623e+06	1.50131e+06	1.4001e+06	382676	432665	410989	-	-	-	-
Zahp001902	Delphinidin-3-O-sambubioside	Flavonoids	Anthocyanidins	C26H29O16+	3	53158-73-9	168055	216783	237496	68163.2	62159	66671	12431.8	12431.8	12431.8	C20491	ko00942	C20491	-
Ydyp005399	Cernuoside*	Flavonoids	Aurones	C21H20O11	1	480-69-3	6588.95	6588.95	6588.95	215417	517836	336881	79457.6	109320	32944.8	-	-	-	-
Zapp009018	2',6'-dimethoxy-4,4'-di-hydroxychalcone*	Flavonoids	Chalcones	C17H16O5	3	123316-64-3	480551	534091	445015	82587.2	73596.4	78790.2	14719.3	14719.3	14719.3	-	-	-	-
MWSHY0062	2',4'-Dihydroxy-6'-methoxychalcone; (E)-Cardamonin	Flavonoids	Chalcones	C16H14O4	2	18956-16-6	2.12421e+06	2.33843e+06	2.50841e+06	868762	802946	771799	65459.8	166448	212574	-	-	-	-
Smdp007779	8-Demethylfarrerol	Flavonoids	Flavanones	C16H14O5	2	-	5.44248e+06	6.80959e+06	5.58527e+06	2.58286e+06	2.60271e+06	2.58418e+06	825594	624197	740538	-	-	-	-
mws1175	Pinostrobin	Flavonoids	Flavanones	C16H14O4	2	480-37-5	1.11951e+06	1.13635e+06	1.13071e+06	470285	424995	433228	1.89546e+06	2.48527e+06	2.58918e+06	C16419	ko00941	C16419	-
mws1454	Persicoside*	Flavonoids	Flavanones	C23H26O11	3	28978-03-2	4.36824e+06	2.73158e+06	3.19442e+06	1.18883e+06	1.31259e+06	1.32637e+06	237766	237766	237766	-	-	-	-
pme1611	Isohemiphloin	Flavonoids	Flavanones	C21H22O10	3	3682-02-8	62698.1	55612.3	77187.9	628294	639895	562033	279039	272737	298987	-	-	-	-
mws0040	Chrysin	Flavonoids	Flavones	C15H10O4	1	480-40-0	3.01256e+07	3.73209e+07	3.8767e+07	1.6127e+08	1.72824e+08	1.73958e+08	1.08209e+07	1.02563e+07	9.2405e+06	C10028	ko00941	C10028	MetMap110
Zbsp005521	Chrysin-5-O-glucoside (Toringin)*	Flavonoids	Flavones	C21H20O9	1	1329-10-8	734597	724539	466995	1.48088e+06	1.35519e+06	1.22329e+06	1.08753e+07	1.04756e+07	1.08298e+07	-	-	CM00873	MetMap110
Lmyp005841	Chrysin-7-O-glucoside*	Flavonoids	Flavones	C21H20O9	1	31025-53-3	547319	664068	668311	1.20567e+06	2.06492e+06	1.15655e+06	7.8183e+06	1.11884e+07	1.36032e+07	-	-	CM00874	MetMap110
Lmzp004885	Tricin	Flavonoids	Flavones	C17H14O7	3	520-32-1	411515	493994	424520	1.23946e+06	1.29667e+06	1.17589e+06	198169	235055	212534	C10193	-	C10193	-
Lajp006633	5,8-dihydroxy-6,7,3',4'-tetramethoxyflavone-8-O-β-D-glucoside*	Flavonoids	Flavones	C25H28O13	1	-	5.03407e+06	4.46537e+06	4.58301e+06	2.33036e+06	2.18975e+06	2.15597e+06	617717	720918	823830	-	-	CM01108	MetMap120
Wagp007602	Demethoxysudachitin*	Flavonoids	Flavones	C17H14O7	1	4323-80-2	34469.2	84249	66783.3	116724	134159	125099	23457.3	25462	28098.9	-	-	CM00946	MetMap121
Safp008433	Dichotosin	Flavonoids	Flavones	C23H28O9	3	-	3.75509e+06	4.30972e+06	2.78598e+06	557195	557195	557195	1.79933e+07	1.16403e+07	1.28173e+07	-	-	-	-
MWSHY0123	Wogonin	Flavonoids	Flavones	C16H12O5	2	632-85-9	410312	210514	316292	1.2578e+06	1.18348e+06	1.46057e+06	42102.7	42102.7	42102.7	C10197	-	C10197	MetMap110
Zbrn008158	Chrysoeriol*	Flavonoids	Flavones	C16H12O6	3	491-71-4	36870.9	26981.8	37711.1	164560	185473	192980	5396.36	5396.36	5396.36	C04293	ko00944	C04293	MetMap105
Lmxn007456	Acerosin	Flavonoids	Flavones	C18H16O8	1	15835-74-2	14112.7	35320.5	30253.5	9165.73	11415.2	7244.93	1448.99	1448.99	1448.99	C09982	-	C09982	MetMap121
MWStz724	5,7,3'-Trihydroxy-6,4',5'-trimethoxyflavone	Flavonoids	Flavones	C18H16O8	1	78417-26-2	25592	28661.2	33703.8	1293.91	1293.91	1293.91	6469.57	6616.06	10425.6	-	-	-	-
Zmjp006741	Chrysosplenoside E*	Flavonoids	Flavonols	C25H28O13	1	-	5.53741e+06	4.7193e+06	4.90948e+06	2.3057e+06	2.26475e+06	2.30936e+06	943427	735548	791004	-	-	-	-
Zmjp006451	3,6,7,4'-tetramethylquercetagetin 3'-O-beta-D-glucoside*	Flavonoids	Flavonols	C25H28O13	1	-	5.32509e+06	4.87751e+06	4.81911e+06	2.25911e+06	2.17269e+06	2.18025e+06	904835	859182	831637	-	-	-	-
Zmjp004311	Chrysosplenetin-4'-O-glucoside*	Flavonoids	Flavonols	C25H28O13	1	23279-19-8	5.32509e+06	4.87751e+06	4.81911e+06	2.25911e+06	2.17269e+06	2.18025e+06	904835	859182	831637	-	-	-	-
Lcyp000673	Prudomestin	Flavonoids	Flavonols	C17H14O7	3	3443-28-5	471421	595306	469588	1.26333e+06	1.21149e+06	1.22013e+06	245257	201340	263286	-	-	-	-
Wagp010987	Gossypetin 3,7,8,3',4'-pentamethyl ether*	Flavonoids	Flavonols	C20H20O8	2	-	279588	293488	305673	80330.9	73297.6	131250	58650.9	34691.1	44383.7	-	-	-	-
Wagp009413	5,7-Dihydroxy-3,4',6,8-tetramethoxyflavone*	Flavonoids	Flavonols	C19H18O8	1	50461-86-4	219844	161504	206147	107037	101402	67487.7	31966.1	36411.2	45877.9	-	-	CM01017	MetMap124
Lmqp007185	Kaempferol-3-O-(4''-O-p-Coumaroyl)rhamnoside*	Flavonoids	Flavonols	C30H26O12	2	623927-14-0	2185.29	2185.29	2185.29	110420	53269.9	87046.2	27816.1	10926.5	28509.9	-	-	CM00482	MetMap114
HJAP005	Laricitrin-3-O-glucoside*	Flavonoids	Flavonols	C22H22O13	1	39986-90-8	1.35277e+06	1.23232e+06	1.50133e+06	89436.9	89436.9	89436.9	796912	721285	447184	-	-	CM00824	MetMap109
Hmcp002316	Isorhamnetin-3-O-arabinoside*	Flavonoids	Flavonols	C21H20O11	1	-	6588.95	6588.95	6588.95	215417	517836	336881	79457.6	109320	32944.8	-	-	CM00832	MetMap109
Wahsn07345	Kaempferide-3-O-(3''-Z-p-coumaroylarabinoside)	Flavonoids	Flavonols	C30H26O12	1	-	719108	861909	691542	1.77002e+06	1.77184e+06	1.69948e+06	358465	329342	339441	-	-	-	-
Zbjn008081	Kaempferide*	Flavonoids	Flavonols	C16H12O6	3	491-54-3	36870.9	26981.8	37711.1	164560	185473	192980	5396.36	5396.36	5396.36	C10098	ko00944	C10098	-
pmp001164	Iristectorin B	Flavonoids	Isoflavones	C23H24O12	3	94396-09-5	116461	101946	83388.6	267368	279159	203945	39750.2	14694.1	56224.4	-	-	-	-
mws0918	Prunetin (5,4'-Dihydroxy-7-methoxyisoflavone)	Flavonoids	Isoflavones	C16H12O5	3	552-59-0	1.58508e+06	1.70217e+06	2.04124e+06	7.55559e+06	7.58799e+06	8.05044e+06	903319	788487	898088	C10521	ko00943	C10521	MetMap112
Zjhp090604	5,7-dihydroxy-3-(4'-hydroxybenzyl)-chroman-4-one	Flavonoids	Other Flavonoids	C16H14O5	1	-	4.86007e+06	6.18415e+06	4.81445e+06	2.26988e+06	2.31868e+06	2.14799e+06	620364	428266	666296	-	-	-	-
pmp001012	6-Hydroxy-1,2,3,7-tetramethoxyxanthone	Flavonoids	Other Flavonoids	C17H16O7	2	64756-87-2	442665	475157	401697	904548	780427	1.04062e+06	191358	198022	230199	-	-	-	-
Wbtp006564	4,8,10-trihydroxy-2-methoxy-1h,2h-furo[3,2-a]xanthen-11-one*	Flavonoids	Other Flavonoids	C16H12O7	3	-	141926	141926	141926	2.88274e+06	1.73491e+06	1.59573e+06	885241	709631	1.10651e+06	-	-	-	-
Wbtp004798	8,11-dimethoxy-2h-[1,3]dioxolo[4,5-b]xanthen-10-one	Flavonoids	Other Flavonoids	C16H12O6	3	-	3.02841e+06	3.19913e+06	2.09673e+06	5.84152e+06	4.55224e+06	6.76646e+06	1.53975e+06	1.00549e+06	1.17614e+06	-	-	-	-
Zmmp003957	Phe-Glu-Leu	Amino acids and derivatives	Amino acids and derivatives	C20H29N3O6	3	-	1.36768e+06	1.21124e+06	1.40152e+06	365098	389078	478461	158791	146976	75136	-	-	-	-
Lcsp003681	Val-Val-Leu	Amino acids and derivatives	Amino acids and derivatives	C16H31N3O4	3	-	2702.76	2702.76	2702.76	43833.6	51634.7	63329.5	13513.8	21561.8	33836.5	-	-	-	-
pme2527	L-Ornithine	Amino acids and derivatives	Amino acids and derivatives	C5H12N2O2	3	348-66-3	255230	271157	190657	4.65102e+06	4.76809e+06	4.96726e+06	1.09256e+06	1.02526e+06	1.08616e+06	C00077	ko00220,ko00330,ko00470,ko00480,ko01100,ko01110,ko01210,ko01230,ko02010,ko04148	C00077	-
Zbqp003444	4-amino-5-oxo-5-(pentylamino)pentanoic acid	Amino acids and derivatives	Amino acids and derivatives	C10H20N2O3	2	-	1.13165e+07	1.03367e+07	1.21645e+07	763480	910236	918820	288179	327340	270376	-	-	-	-
mws1401	N5-Ethyl-L-glutamine	Amino acids and derivatives	Amino acids and derivatives	C7H14N2O3	3	3081-61-6	1.13328e+06	1.23243e+06	1.33393e+06	3.20817e+06	3.10898e+06	3.2099e+06	86844.1	86844.1	86844.1	C01047	-	C01047	-
Zmmp003258	Glu-Pro-Leu	Amino acids and derivatives	Amino acids and derivatives	C16H27N3O6	3	-	23542	29444.7	31279.7	81939.9	77412.9	65132	12909.3	13763.5	14257.3	-	-	-	-
Zbqp002313	4-amino-5-(butylamino)-5-oxopentanoic acid	Amino acids and derivatives	Amino acids and derivatives	C9H18N2O3	3	-	1.02409e+06	1.09099e+06	1.10885e+06	96129.4	54011.9	84119.2	27544.3	32451	28991.6	-	-	-	-
Zbqp000676	3-(triazan-2-yl)propyl L-prolinate	Amino acids and derivatives	Amino acids and derivatives	C8H18N4O2	1	-	52757.4	52757.4	52757.4	6.31043e+06	5.25614e+06	5.43174e+06	1.49252e+06	1.41937e+06	1.41913e+06	-	-	-	-
pma0948	Phenylethanolamine	Alkaloids	Alkaloids	C8H11NO	3	7568-93-6	101213	105643	88774.9	364047	443947	435094	9225.09	9225.09	9225.09	C02735	-	C02735	-
Wbsp000161	Lannotinidine C	Alkaloids	Alkaloids	C26H35NO5	3	-	2.3548e+06	4.58065e+06	1.9849e+06	188374	188374	188374	980251	941872	1.38205e+06	-	-	-	-
Walp003622	6-beta-d-glucopyranosyloxyindole-3-carboxylic acid	Alkaloids	Plumerane	C15H17NO8	3	-	936629	1.1211e+06	1.24456e+06	358542	303016	428906	60603.1	60603.1	60603.1	-	-	-	-
Zmtn001624	N-Acetylisatin	Alkaloids	Plumerane	C10H7NO3	3	574-17-4	1.39463e+07	1.44631e+07	1.45771e+07	1.25168e+06	1.15509e+06	1.1279e+06	6.68086e+06	6.77534e+06	6.90936e+06	C02172	ko00380	C02172	-
Zmsp000758	1-(Hydroxymethyl)hexahydro-1h-pyrrolizin-2-ol	Alkaloids	Pyrrole alkaloids	C8H15NO2	2	-	1.4813e+07	1.33201e+07	1.34403e+07	6.25202e+07	6.07251e+07	6.13898e+07	2.88821e+07	2.81587e+07	2.7792e+07	-	-	-	-
Zmtn001464	Xanthurenic acid	Alkaloids	Quinoline alkaloids	C10H7NO4	3	59-00-7	1.76753e+06	1.78351e+06	1.87847e+06	7.57796e+06	7.91009e+06	7.60464e+06	3.83028e+06	3.85874e+06	3.77988e+06	C02470	ko00380	C02470	-
