# Supplementary material for: Revealing the key antioxidant compounds and potential action mechanisms of Pinus koraiensis pinecones by integrating UPLC-MS- based widely targeted metabolomics, network pharmacology, and molecular docking approaches
Source: Research Square preprint supplement (doi:10.21203/rs.3.rs-6712981/v1), 2025-06-25
Supplement: Supplementary file 3 [file 4b908f146724050f8ebcab16.xlsx]

## Sheet: Sheet1
Spearman correlation analysis of antioxidant capacity indices (TPC, TFC, ABTS, DPPH, FRAP, and ·OH) with common differential metabolites.
Compounds	Antioxidant capacity indicators	r-value	P-value
5,7-dihydroxy-3-(4'-hydroxybenzyl)-chroman-4-one	TPC	-0.45	0.224216
5,7-dihydroxy-3-(4'-hydroxybenzyl)-chroman-4-one	TFC	-0.451887	0.222039
5,7-dihydroxy-3-(4'-hydroxybenzyl)-chroman-4-one	ABTS	-0.483333	0.18747
5,7-dihydroxy-3-(4'-hydroxybenzyl)-chroman-4-one	DPPH	-0.443519	0.231784
5,7-dihydroxy-3-(4'-hydroxybenzyl)-chroman-4-one	FRAP	-0.433333	0.243952
5,7-dihydroxy-3-(4'-hydroxybenzyl)-chroman-4-one	OH	-0.45	0.224216
Chrysin	TPC	0.45	0.224216
Chrysin	TFC	0.527201	0.144699
Chrysin	ABTS	0.466667	0.205386
Chrysin	DPPH	0.410045	0.27303
Chrysin	FRAP	0.466667	0.205386
Chrysin	OH	0.45	0.224216
Toringin	TPC	0.5	0.170471
Toringin	TFC	0.426782	0.251957
Toringin	ABTS	0.383333	0.308495
Toringin	DPPH	0.443519	0.231784
Toringin	FRAP	0.383333	0.308495
Toringin	OH	0.5	0.170471
Bauhinoxepin I	TPC	-0.45	0.224216
Bauhinoxepin I	TFC	-0.376572	0.317823
Bauhinoxepin I	ABTS	-0.466667	0.205386
Bauhinoxepin I	DPPH	-0.48536	0.185354
Bauhinoxepin I	FRAP	-0.416667	0.264586
Bauhinoxepin I	OH	-0.45	0.224216
Chrysosplenoside E	TPC	-0.366667	0.33174
Chrysosplenoside E	TFC	-0.468623	0.203236
Chrysosplenoside E	ABTS	-0.483333	0.18747
Chrysosplenoside E	DPPH	-0.476992	0.194179
Chrysosplenoside E	FRAP	-0.483333	0.18747
Chrysosplenoside E	OH	-0.416667	0.264586
3,6,7,4'-tetramethylquercetagetin 3'-O-beta-D-glucoside	TPC	-0.383333	0.308495
3,6,7,4'-tetramethylquercetagetin 3'-O-beta-D-glucoside	TFC	-0.460255	0.212522
3,6,7,4'-tetramethylquercetagetin 3'-O-beta-D-glucoside	ABTS	-0.516667	0.15439
3,6,7,4'-tetramethylquercetagetin 3'-O-beta-D-glucoside	DPPH	-0.502096	0.168397
3,6,7,4'-tetramethylquercetagetin 3'-O-beta-D-glucoside	FRAP	-0.516667	0.15439
3,6,7,4'-tetramethylquercetagetin 3'-O-beta-D-glucoside	OH	-0.433333	0.243952
Chrysosplenetin-4'-O-glucoside	TPC	-0.383333	0.308495
Chrysosplenetin-4'-O-glucoside	TFC	-0.460255	0.212522
Chrysosplenetin-4'-O-glucoside	ABTS	-0.516667	0.15439
Chrysosplenetin-4'-O-glucoside	DPPH	-0.502096	0.168397
Chrysosplenetin-4'-O-glucoside	FRAP	-0.516667	0.15439
Chrysosplenetin-4'-O-glucoside	OH	-0.433333	0.243952
8-Demethylfarrerol	TPC	-0.45	0.224216
8-Demethylfarrerol	TFC	-0.376572	0.317823
8-Demethylfarrerol	ABTS	-0.466667	0.205386
8-Demethylfarrerol	DPPH	-0.48536	0.185354
8-Demethylfarrerol	FRAP	-0.416667	0.264586
8-Demethylfarrerol	OH	-0.45	0.224216
Prudomestin	TPC	0.5	0.170471
Prudomestin	TFC	0.426782	0.251957
Prudomestin	ABTS	0.366667	0.33174
Prudomestin	DPPH	0.43515	0.241757
Prudomestin	FRAP	0.466667	0.205386
Prudomestin	OH	0.45	0.224216
Gossypetin 3,7,8,3',4'-pentamethyl ether	TPC	-0.416667	0.264586
Gossypetin 3,7,8,3',4'-pentamethyl ether	TFC	-0.418414	0.262381
Gossypetin 3,7,8,3',4'-pentamethyl ether	ABTS	-0.483333	0.18747
Gossypetin 3,7,8,3',4'-pentamethyl ether	DPPH	-0.476992	0.194179
Gossypetin 3,7,8,3',4'-pentamethyl ether	FRAP	-0.433333	0.243952
Gossypetin 3,7,8,3',4'-pentamethyl ether	OH	-0.416667	0.264586
Phe-Glu-Leu	TPC	-0.433333	0.243952
Phe-Glu-Leu	TFC	-0.410045	0.27303
Phe-Glu-Leu	ABTS	-0.416667	0.264586
Phe-Glu-Leu	DPPH	-0.476992	0.194179
Phe-Glu-Leu	FRAP	-0.466667	0.205386
Phe-Glu-Leu	OH	-0.433333	0.243952
Chrysin-7-O-glucoside	TPC	0.366667	0.33174
Chrysin-7-O-glucoside	TFC	0.43515	0.241757
Chrysin-7-O-glucoside	ABTS	0.5	0.170471
Chrysin-7-O-glucoside	DPPH	0.527201	0.144699
Chrysin-7-O-glucoside	FRAP	0.483333	0.18747
Chrysin-7-O-glucoside	OH	0.466667	0.205386
Pinostrobin	TPC	-0.466667	0.205386
Pinostrobin	TFC	-0.476992	0.194179
Pinostrobin	ABTS	-0.483333	0.18747
Pinostrobin	DPPH	-0.43515	0.241757
Pinostrobin	FRAP	-0.4	0.286105
Pinostrobin	OH	-0.466667	0.205386
Tricin	TPC	0.366667	0.33174
Tricin	TFC	0.468623	0.203236
Tricin	ABTS	0.483333	0.18747
Tricin	DPPH	0.476992	0.194179
Tricin	FRAP	0.483333	0.18747
Tricin	OH	0.416667	0.264586
5,8-dihydroxy-6,7,3',4'-tetramethoxyflavone-8-O-β-D-glucoside	TPC	-0.466667	0.205386
5,8-dihydroxy-6,7,3',4'-tetramethoxyflavone-8-O-β-D-glucoside	TFC	-0.543938	0.130055
5,8-dihydroxy-6,7,3',4'-tetramethoxyflavone-8-O-β-D-glucoside	ABTS	-0.433333	0.243952
5,8-dihydroxy-6,7,3',4'-tetramethoxyflavone-8-O-β-D-glucoside	DPPH	-0.376572	0.317823
5,8-dihydroxy-6,7,3',4'-tetramethoxyflavone-8-O-β-D-glucoside	FRAP	-0.483333	0.18747
5,8-dihydroxy-6,7,3',4'-tetramethoxyflavone-8-O-β-D-glucoside	OH	-0.416667	0.264586
Demethoxysudachitin	TPC	0.4	0.286105
Demethoxysudachitin	TFC	0.476992	0.194179
Demethoxysudachitin	ABTS	0.483333	0.18747
Demethoxysudachitin	DPPH	0.468623	0.203236
Demethoxysudachitin	FRAP	0.533333	0.139227
Demethoxysudachitin	OH	0.4	0.286105
6-Hydroxy-1,2,3,7-tetramethoxyxanthone	TPC	0.483333	0.18747
6-Hydroxy-1,2,3,7-tetramethoxyxanthone	TFC	0.43515	0.241757
6-Hydroxy-1,2,3,7-tetramethoxyxanthone	ABTS	0.416667	0.264586
6-Hydroxy-1,2,3,7-tetramethoxyxanthone	DPPH	0.426782	0.251957
6-Hydroxy-1,2,3,7-tetramethoxyxanthone	FRAP	0.516667	0.15439
6-Hydroxy-1,2,3,7-tetramethoxyxanthone	OH	0.383333	0.308495
2',6'-dimethoxy-4,4'-di-hydroxychalcone	TPC	-0.42379	0.255659
2',6'-dimethoxy-4,4'-di-hydroxychalcone	TFC	-0.468123	0.203784
2',6'-dimethoxy-4,4'-di-hydroxychalcone	ABTS	-0.525499	0.14624
2',6'-dimethoxy-4,4'-di-hydroxychalcone	DPPH	-0.493657	0.176832
2',6'-dimethoxy-4,4'-di-hydroxychalcone	FRAP	-0.457693	0.215412
2',6'-dimethoxy-4,4'-di-hydroxychalcone	OH	-0.474644	0.196696
5,7-Dihydroxy-3,4',6,8-tetramethoxyflavone	TPC	-0.466667	0.205386
5,7-Dihydroxy-3,4',6,8-tetramethoxyflavone	TFC	-0.543938	0.130055
5,7-Dihydroxy-3,4',6,8-tetramethoxyflavone	ABTS	-0.433333	0.243952
5,7-Dihydroxy-3,4',6,8-tetramethoxyflavone	DPPH	-0.376572	0.317823
5,7-Dihydroxy-3,4',6,8-tetramethoxyflavone	FRAP	-0.483333	0.18747
5,7-Dihydroxy-3,4',6,8-tetramethoxyflavone	OH	-0.416667	0.264586
Artemisinate	TPC	0.440741	0.235069
Artemisinate	TFC	0.476635	0.194561
Artemisinate	ABTS	0.440741	0.235069
Artemisinate	DPPH	0.451101	0.222945
Artemisinate	FRAP	0.457693	0.215412
Artemisinate	OH	0.440741	0.235069
Delphinidin-3-O-sambubioside	TPC	-0.474644	0.196696
Delphinidin-3-O-sambubioside	TFC	-0.468123	0.203784
Delphinidin-3-O-sambubioside	ABTS	-0.474644	0.196696
Delphinidin-3-O-sambubioside	DPPH	-0.442589	0.23288
Delphinidin-3-O-sambubioside	FRAP	-0.457693	0.215412
Delphinidin-3-O-sambubioside	OH	-0.42379	0.255659
1-(Hydroxymethyl)hexahydro-1h-pyrrolizin-2-ol	TPC	0.95	8.76252e-05
1-(Hydroxymethyl)hexahydro-1h-pyrrolizin-2-ol	TFC	0.878669	0.0018158
1-(Hydroxymethyl)hexahydro-1h-pyrrolizin-2-ol	ABTS	0.866667	0.0024954
1-(Hydroxymethyl)hexahydro-1h-pyrrolizin-2-ol	DPPH	0.887037	0.00142602
1-(Hydroxymethyl)hexahydro-1h-pyrrolizin-2-ol	FRAP	0.816667	0.00722479
1-(Hydroxymethyl)hexahydro-1h-pyrrolizin-2-ol	OH	0.95	8.76252e-05
Laricitrin-3-O-glucoside	TPC	-0.915386	0.000533717
Laricitrin-3-O-glucoside	TFC	-0.902201	0.000874322
Laricitrin-3-O-glucoside	ABTS	-0.898434	0.000994195
Laricitrin-3-O-glucoside	DPPH	-0.919224	0.000455428
Laricitrin-3-O-glucoside	FRAP	-0.96624	2.25207e-05
Laricitrin-3-O-glucoside	OH	-0.864531	0.00263237
Dichotosin	TPC	-0.406838	0.27717
Dichotosin	TFC	-0.425567	0.253457
Dichotosin	ABTS	-0.525499	0.14624
Dichotosin	DPPH	-0.51068	0.160061
Dichotosin	FRAP	-0.457693	0.215412
Dichotosin	OH	-0.457693	0.215412
3,4'-dihydroxy-5-methoxybibenzyl	TPC	0.466667	0.205386
3,4'-dihydroxy-5-methoxybibenzyl	TFC	0.460255	0.212522
3,4'-dihydroxy-5-methoxybibenzyl	ABTS	0.45	0.224216
3,4'-dihydroxy-5-methoxybibenzyl	DPPH	0.426782	0.251957
3,4'-dihydroxy-5-methoxybibenzyl	FRAP	0.533333	0.139227
3,4'-dihydroxy-5-methoxybibenzyl	OH	0.366667	0.33174
Soranjidiol; 1,6-Dihydroxy-2-methyl-9,10-anthraquinone	TPC	0.466667	0.205386
Soranjidiol; 1,6-Dihydroxy-2-methyl-9,10-anthraquinone	TFC	0.543938	0.130055
Soranjidiol; 1,6-Dihydroxy-2-methyl-9,10-anthraquinone	ABTS	0.433333	0.243952
Soranjidiol; 1,6-Dihydroxy-2-methyl-9,10-anthraquinone	DPPH	0.376572	0.317823
Soranjidiol; 1,6-Dihydroxy-2-methyl-9,10-anthraquinone	FRAP	0.483333	0.18747
Soranjidiol; 1,6-Dihydroxy-2-methyl-9,10-anthraquinone	OH	0.416667	0.264586
1-O-Galloyl-3-O-p-Coumaroyl-β-D-glucose	TPC	0.983192	1.99397e-06
1-O-Galloyl-3-O-p-Coumaroyl-β-D-glucose	TFC	0.936247	0.000202335
1-O-Galloyl-3-O-p-Coumaroyl-β-D-glucose	ABTS	0.864531	0.00263237
1-O-Galloyl-3-O-p-Coumaroyl-β-D-glucose	DPPH	0.876667	0.00191891
1-O-Galloyl-3-O-p-Coumaroyl-β-D-glucose	FRAP	0.915386	0.000533717
1-O-Galloyl-3-O-p-Coumaroyl-β-D-glucose	OH	0.932337	0.000248221
Phenylethanolamine	TPC	0.457693	0.215412
Phenylethanolamine	TFC	0.502169	0.168326
Phenylethanolamine	ABTS	0.457693	0.215412
Phenylethanolamine	DPPH	0.425567	0.253457
Phenylethanolamine	FRAP	0.491596	0.178927
Phenylethanolamine	OH	0.406838	0.27717
6-beta-d-glucopyranosyloxyindole-3-carboxylic acid	TPC	-0.457693	0.215412
6-beta-d-glucopyranosyloxyindole-3-carboxylic acid	TFC	-0.442589	0.23288
6-beta-d-glucopyranosyloxyindole-3-carboxylic acid	ABTS	-0.457693	0.215412
6-beta-d-glucopyranosyloxyindole-3-carboxylic acid	DPPH	-0.468123	0.203784
6-beta-d-glucopyranosyloxyindole-3-carboxylic acid	FRAP	-0.42379	0.255659
6-beta-d-glucopyranosyloxyindole-3-carboxylic acid	OH	-0.457693	0.215412
Ranunculinin glucoside	TPC	0.457693	0.215412
Ranunculinin glucoside	TFC	0.451101	0.222945
Ranunculinin glucoside	ABTS	0.406838	0.27717
Ranunculinin glucoside	DPPH	0.451101	0.222945
Ranunculinin glucoside	FRAP	0.440741	0.235069
Ranunculinin glucoside	OH	0.457693	0.215412
ranunculin*	TPC	0.457693	0.215412
ranunculin*	TFC	0.451101	0.222945
ranunculin*	ABTS	0.406838	0.27717
ranunculin*	DPPH	0.451101	0.222945
ranunculin*	FRAP	0.440741	0.235069
ranunculin*	OH	0.457693	0.215412
3-(triazan-2-yl)propyl L-prolinate	TPC	0.949289	9.20002e-05
3-(triazan-2-yl)propyl L-prolinate	TFC	0.927735	0.000311077
3-(triazan-2-yl)propyl L-prolinate	ABTS	0.864531	0.00263237
3-(triazan-2-yl)propyl L-prolinate	DPPH	0.885179	0.001507
3-(triazan-2-yl)propyl L-prolinate	FRAP	0.864531	0.00263237
3-(triazan-2-yl)propyl L-prolinate	OH	0.949289	9.20002e-05
Staphylionoside A	TPC	-0.932337	0.000248221
Staphylionoside A	TFC	-0.919224	0.000455428
Staphylionoside A	ABTS	-0.915386	0.000533717
Staphylionoside A	DPPH	-0.885179	0.001507
Staphylionoside A	FRAP	-0.881483	0.00167742
Staphylionoside A	OH	-0.881483	0.00167742
Wogonin	TPC	0.508548	0.162109
Wogonin	TFC	0.425567	0.253457
Wogonin	ABTS	0.457693	0.215412
Wogonin	DPPH	0.451101	0.222945
Wogonin	FRAP	0.440741	0.235069
Wogonin	OH	0.457693	0.215412
2',4'-Dihydroxy-6'-methoxychalcone; (E)-Cardamonin	TPC	-0.516667	0.15439
2',4'-Dihydroxy-6'-methoxychalcone; (E)-Cardamonin	TFC	-0.493728	0.17676
2',4'-Dihydroxy-6'-methoxychalcone; (E)-Cardamonin	ABTS	-0.433333	0.243952
2',4'-Dihydroxy-6'-methoxychalcone; (E)-Cardamonin	DPPH	-0.376572	0.317823
2',4'-Dihydroxy-6'-methoxychalcone; (E)-Cardamonin	FRAP	-0.433333	0.243952
2',4'-Dihydroxy-6'-methoxychalcone; (E)-Cardamonin	OH	-0.416667	0.264586
3-Oxo-9beta-pimara-7,15-dien-19,6beta-olide	TPC	0.881483	0.00167742
3-Oxo-9beta-pimara-7,15-dien-19,6beta-olide	TFC	0.910713	0.000641193
3-Oxo-9beta-pimara-7,15-dien-19,6beta-olide	ABTS	0.915386	0.000533717
3-Oxo-9beta-pimara-7,15-dien-19,6beta-olide	DPPH	0.927735	0.000311077
3-Oxo-9beta-pimara-7,15-dien-19,6beta-olide	FRAP	0.864531	0.00263237
3-Oxo-9beta-pimara-7,15-dien-19,6beta-olide	OH	0.932337	0.000248221
Iristectorin B	TPC	0.466667	0.205386
Iristectorin B	TFC	0.418414	0.262381
Iristectorin B	ABTS	0.433333	0.243952
Iristectorin B	DPPH	0.476992	0.194179
Iristectorin B	FRAP	0.433333	0.243952
Iristectorin B	OH	0.466667	0.205386
4,8,10-Trihydroxy-2-methoxy-1,2-dihydrofuro[3,2-a]xanthen-11-one	TPC	0.915386	0.000533717
4,8,10-Trihydroxy-2-methoxy-1,2-dihydrofuro[3,2-a]xanthen-11-one	TFC	0.876667	0.00191891
4,8,10-Trihydroxy-2-methoxy-1,2-dihydrofuro[3,2-a]xanthen-11-one	ABTS	0.881483	0.00167742
4,8,10-Trihydroxy-2-methoxy-1,2-dihydrofuro[3,2-a]xanthen-11-one	DPPH	0.961781	3.46167e-05
4,8,10-Trihydroxy-2-methoxy-1,2-dihydrofuro[3,2-a]xanthen-11-one	FRAP	0.898434	0.000994195
4,8,10-Trihydroxy-2-methoxy-1,2-dihydrofuro[3,2-a]xanthen-11-one	OH	0.96624	2.25207e-05
LysoPE 18:4	TPC	-0.915386	0.000533717
LysoPE 18:4	TFC	-0.902201	0.000874322
LysoPE 18:4	ABTS	-0.949289	9.20002e-05
LysoPE 18:4	DPPH	-0.919224	0.000455428
LysoPE 18:4	FRAP	-0.864531	0.00263237
LysoPE 18:4	OH	-0.915386	0.000533717
Aviculin	TPC	0.866667	0.0024954
Aviculin	TFC	0.928878	0.000294526
Aviculin	ABTS	0.933333	0.0002359
Aviculin	DPPH	0.887037	0.00142602
Aviculin	FRAP	0.95	8.76252e-05
Aviculin	OH	0.816667	0.00722479
Cernuoside	TPC	0.881483	0.00167742
Cernuoside	TFC	0.961781	3.46167e-05
Cernuoside	ABTS	0.96624	2.25207e-05
Cernuoside	DPPH	0.902201	0.000874322
Cernuoside	FRAP	0.915386	0.000533717
Cernuoside	OH	0.881483	0.00167742
4-amino-5-oxo-5-(pentylamino)pentanoic acid	TPC	-0.466667	0.205386
4-amino-5-oxo-5-(pentylamino)pentanoic acid	TFC	-0.426782	0.251957
4-amino-5-oxo-5-(pentylamino)pentanoic acid	ABTS	-0.383333	0.308495
4-amino-5-oxo-5-(pentylamino)pentanoic acid	DPPH	-0.460255	0.212522
4-amino-5-oxo-5-(pentylamino)pentanoic acid	FRAP	-0.45	0.224216
4-amino-5-oxo-5-(pentylamino)pentanoic acid	OH	-0.466667	0.205386
Saurufuran B	TPC	0.457693	0.215412
Saurufuran B	TFC	0.400033	0.286062
Saurufuran B	ABTS	0.457693	0.215412
Saurufuran B	DPPH	0.502169	0.168326
Saurufuran B	FRAP	0.389887	0.299589
Saurufuran B	OH	0.508548	0.162109
Deoxyerythrolaccin	TPC	0.915386	0.000533717
Deoxyerythrolaccin	TFC	0.902201	0.000874322
Deoxyerythrolaccin	ABTS	0.932337	0.000248221
Deoxyerythrolaccin	DPPH	0.910713	0.000641193
Deoxyerythrolaccin	FRAP	0.949289	9.20002e-05
Deoxyerythrolaccin	OH	0.864531	0.00263237
5-hydroxy-6,8-dimethoxy-2,3-dimethylbenzo[g]chromen-4-one	TPC	0.406838	0.27717
5-hydroxy-6,8-dimethoxy-2,3-dimethylbenzo[g]chromen-4-one	TFC	0.442589	0.23288
5-hydroxy-6,8-dimethoxy-2,3-dimethylbenzo[g]chromen-4-one	ABTS	0.508548	0.162109
5-hydroxy-6,8-dimethoxy-2,3-dimethylbenzo[g]chromen-4-one	DPPH	0.519191	0.152034
5-hydroxy-6,8-dimethoxy-2,3-dimethylbenzo[g]chromen-4-one	FRAP	0.42379	0.255659
5-hydroxy-6,8-dimethoxy-2,3-dimethylbenzo[g]chromen-4-one	OH	0.508548	0.162109
8,11-dimethoxy-2h-[1,3]dioxolo[4,5-b]xanthen-10-one	TPC	0.533333	0.139227
8,11-dimethoxy-2h-[1,3]dioxolo[4,5-b]xanthen-10-one	TFC	0.48536	0.185354
8,11-dimethoxy-2h-[1,3]dioxolo[4,5-b]xanthen-10-one	ABTS	0.366667	0.33174
8,11-dimethoxy-2h-[1,3]dioxolo[4,5-b]xanthen-10-one	DPPH	0.376572	0.317823
8,11-dimethoxy-2h-[1,3]dioxolo[4,5-b]xanthen-10-one	FRAP	0.466667	0.205386
8,11-dimethoxy-2h-[1,3]dioxolo[4,5-b]xanthen-10-one	OH	0.433333	0.243952
N5-Ethyl-L-glutamine	TPC	0.457693	0.215412
N5-Ethyl-L-glutamine	TFC	0.476635	0.194561
N5-Ethyl-L-glutamine	ABTS	0.457693	0.215412
N5-Ethyl-L-glutamine	DPPH	0.451101	0.222945
N5-Ethyl-L-glutamine	FRAP	0.491596	0.178927
N5-Ethyl-L-glutamine	OH	0.457693	0.215412
Glu-Pro-Leu	TPC	0.383333	0.308495
Glu-Pro-Leu	TFC	0.410045	0.27303
Glu-Pro-Leu	ABTS	0.466667	0.205386
Glu-Pro-Leu	DPPH	0.527201	0.144699
Glu-Pro-Leu	FRAP	0.466667	0.205386
Glu-Pro-Leu	OH	0.483333	0.18747
Isohemiphloin	TPC	0.866667	0.0024954
Isohemiphloin	TFC	0.870301	0.00227378
Isohemiphloin	ABTS	0.933333	0.0002359
Isohemiphloin	DPPH	0.979088	4.26632e-06
Isohemiphloin	FRAP	0.883333	0.0015905
Isohemiphloin	OH	0.966667	2.15503e-05
4-amino-5-(butylamino)-5-oxopentanoic acid	TPC	-0.5	0.170471
4-amino-5-(butylamino)-5-oxopentanoic acid	TFC	-0.476992	0.194179
4-amino-5-(butylamino)-5-oxopentanoic acid	ABTS	-0.433333	0.243952
4-amino-5-(butylamino)-5-oxopentanoic acid	DPPH	-0.418414	0.262381
4-amino-5-(butylamino)-5-oxopentanoic acid	FRAP	-0.433333	0.243952
4-amino-5-(butylamino)-5-oxopentanoic acid	OH	-0.45	0.224216
Ganoderal A	TPC	-0.949289	9.20002e-05
Ganoderal A	TFC	-0.919224	0.000455428
Ganoderal A	ABTS	-0.864531	0.00263237
Ganoderal A	DPPH	-0.902201	0.000874322
Ganoderal A	FRAP	-0.949289	9.20002e-05
Ganoderal A	OH	-0.898434	0.000994195
Isolugrandoside	TPC	0.9	0.000943062
Isolugrandoside	TFC	0.928878	0.000294526
Isolugrandoside	ABTS	0.916667	0.000506619
Isolugrandoside	DPPH	0.861932	0.00280593
Isolugrandoside	FRAP	0.966667	2.15503e-05
Isolugrandoside	OH	0.8	0.00962792
Praeruptorin A	TPC	0.491596	0.178927
Praeruptorin A	TFC	0.519191	0.152034
Praeruptorin A	ABTS	0.457693	0.215412
Praeruptorin A	DPPH	0.400033	0.286062
Praeruptorin A	FRAP	0.457693	0.215412
Praeruptorin A	OH	0.440741	0.235069
Lannotinidine C	TPC	-0.881483	0.00167742
Lannotinidine C	TFC	-0.919224	0.000455428
Lannotinidine C	ABTS	-0.96624	2.25207e-05
Lannotinidine C	DPPH	-0.936247	0.000202335
Lannotinidine C	FRAP	-0.881483	0.00167742
Lannotinidine C	OH	-0.932337	0.000248221
Isorhamnetin-3-O-arabinoside	TPC	0.881483	0.00167742
Isorhamnetin-3-O-arabinoside	TFC	0.961781	3.46167e-05
Isorhamnetin-3-O-arabinoside	ABTS	0.96624	2.25207e-05
Isorhamnetin-3-O-arabinoside	DPPH	0.902201	0.000874322
Isorhamnetin-3-O-arabinoside	FRAP	0.915386	0.000533717
Isorhamnetin-3-O-arabinoside	OH	0.881483	0.00167742
D-Gluconic acid	TPC	0.4	0.286105
D-Gluconic acid	TFC	0.476992	0.194179
D-Gluconic acid	ABTS	0.483333	0.18747
D-Gluconic acid	DPPH	0.468623	0.203236
D-Gluconic acid	FRAP	0.533333	0.139227
D-Gluconic acid	OH	0.4	0.286105
N-Acetylisatin	TPC	-0.966667	2.15503e-05
N-Acetylisatin	TFC	-0.945615	0.000117091
N-Acetylisatin	ABTS	-0.883333	0.0015905
N-Acetylisatin	DPPH	-0.828459	0.00579537
N-Acetylisatin	FRAP	-0.883333	0.0015905
N-Acetylisatin	OH	-0.866667	0.0024954
3,3'-Dihydroxy-5-methoxybibenzyl	TPC	0.483333	0.18747
3,3'-Dihydroxy-5-methoxybibenzyl	TFC	0.468623	0.203236
3,3'-Dihydroxy-5-methoxybibenzyl	ABTS	0.4	0.286105
3,3'-Dihydroxy-5-methoxybibenzyl	DPPH	0.426782	0.251957
3,3'-Dihydroxy-5-methoxybibenzyl	FRAP	0.516667	0.15439
3,3'-Dihydroxy-5-methoxybibenzyl	OH	0.433333	0.243952
Nor-toralactone	TPC	0.45	0.224216
Nor-toralactone	TFC	0.476992	0.194179
Nor-toralactone	ABTS	0.466667	0.205386
Nor-toralactone	DPPH	0.460255	0.212522
Nor-toralactone	FRAP	0.516667	0.15439
Nor-toralactone	OH	0.45	0.224216
Prunetin (5,4'-Dihydroxy-7-methoxyisoflavone)	TPC	0.466667	0.205386
Prunetin (5,4'-Dihydroxy-7-methoxyisoflavone)	TFC	0.510465	0.160267
Prunetin (5,4'-Dihydroxy-7-methoxyisoflavone)	ABTS	0.45	0.224216
Prunetin (5,4'-Dihydroxy-7-methoxyisoflavone)	DPPH	0.426782	0.251957
Prunetin (5,4'-Dihydroxy-7-methoxyisoflavone)	FRAP	0.483333	0.18747
Prunetin (5,4'-Dihydroxy-7-methoxyisoflavone)	OH	0.466667	0.205386
Gingerglycolipid A	TPC	-0.416667	0.264586
Gingerglycolipid A	TFC	-0.393309	0.29499
Gingerglycolipid A	ABTS	-0.483333	0.18747
Gingerglycolipid A	DPPH	-0.502096	0.168397
Gingerglycolipid A	FRAP	-0.433333	0.243952
Gingerglycolipid A	OH	-0.466667	0.205386
Dihydrojasmonic acid	TPC	0.416667	0.264586
Dihydrojasmonic acid	TFC	0.460255	0.212522
Dihydrojasmonic acid	ABTS	0.5	0.170471
Dihydrojasmonic acid	DPPH	0.476992	0.194179
Dihydrojasmonic acid	FRAP	0.533333	0.139227
Dihydrojasmonic acid	OH	0.416667	0.264586
4-Methylene-2-octyl-5-oxotetrahydrofuran-3-carboxylicacid(C75)	TPC	0.483333	0.18747
4-Methylene-2-octyl-5-oxotetrahydrofuran-3-carboxylicacid(C75)	TFC	0.518833	0.152367
4-Methylene-2-octyl-5-oxotetrahydrofuran-3-carboxylicacid(C75)	ABTS	0.4	0.286105
4-Methylene-2-octyl-5-oxotetrahydrofuran-3-carboxylicacid(C75)	DPPH	0.376572	0.317823
4-Methylene-2-octyl-5-oxotetrahydrofuran-3-carboxylicacid(C75)	FRAP	0.466667	0.205386
4-Methylene-2-octyl-5-oxotetrahydrofuran-3-carboxylicacid(C75)	OH	0.433333	0.243952
Kaempferol-3-O-(4''-O-p-Coumaroyl)rhamnoside	TPC	0.949289	9.20002e-05
Kaempferol-3-O-(4''-O-p-Coumaroyl)rhamnoside	TFC	0.876667	0.00191891
Kaempferol-3-O-(4''-O-p-Coumaroyl)rhamnoside	ABTS	0.864531	0.00263237
Kaempferol-3-O-(4''-O-p-Coumaroyl)rhamnoside	DPPH	0.936247	0.000202335
Kaempferol-3-O-(4''-O-p-Coumaroyl)rhamnoside	FRAP	0.915386	0.000533717
Kaempferol-3-O-(4''-O-p-Coumaroyl)rhamnoside	OH	0.949289	9.20002e-05
1-O-Feruloyl 9,10-Dihydroxypalmitic acid	TPC	0.4	0.286105
1-O-Feruloyl 9,10-Dihydroxypalmitic acid	TFC	0.426782	0.251957
1-O-Feruloyl 9,10-Dihydroxypalmitic acid	ABTS	0.433333	0.243952
1-O-Feruloyl 9,10-Dihydroxypalmitic acid	DPPH	0.493728	0.17676
1-O-Feruloyl 9,10-Dihydroxypalmitic acid	FRAP	0.483333	0.18747
1-O-Feruloyl 9,10-Dihydroxypalmitic acid	OH	0.45	0.224216
Pinosylvin	TPC	0.433333	0.243952
Pinosylvin	TFC	0.43515	0.241757
Pinosylvin	ABTS	0.466667	0.205386
Pinosylvin	DPPH	0.476992	0.194179
Pinosylvin	FRAP	0.516667	0.15439
Pinosylvin	OH	0.433333	0.243952
L-Ornithine	TPC	0.966667	2.15503e-05
L-Ornithine	TFC	0.962352	3.28586e-05
L-Ornithine	ABTS	0.85	0.00370478
L-Ornithine	DPPH	0.828459	0.00579537
L-Ornithine	FRAP	0.933333	0.0002359
L-Ornithine	OH	0.866667	0.0024954
Chlorogenic acid methyl ester	TPC	-0.916667	0.000506619
Chlorogenic acid methyl ester	TFC	-0.953983	6.57887e-05
Chlorogenic acid methyl ester	ABTS	-0.883333	0.0015905
Chlorogenic acid methyl ester	DPPH	-0.861932	0.00280593
Chlorogenic acid methyl ester	FRAP	-0.9	0.000943062
Chlorogenic acid methyl ester	OH	-0.916667	0.000506619
galloyl acetyl glucoside	TPC	0.4	0.286105
galloyl acetyl glucoside	TFC	0.476992	0.194179
galloyl acetyl glucoside	ABTS	0.533333	0.139227
galloyl acetyl glucoside	DPPH	0.468623	0.203236
galloyl acetyl glucoside	FRAP	0.433333	0.243952
galloyl acetyl glucoside	OH	0.45	0.224216
[(1S,2S,3S,7R,9R,13S,14R,15R,17S)-3,15-diacetyloxy-7-hydroxy-2,6,14-trimethyl-4,11,16-trioxo-10-oxatetracyclo[7.7.1.02,7.013,17]heptadec-5-en-17-yl]methylacetate	TPC	0.466667	0.205386
[(1S,2S,3S,7R,9R,13S,14R,15R,17S)-3,15-diacetyloxy-7-hydroxy-2,6,14-trimethyl-4,11,16-trioxo-10-oxatetracyclo[7.7.1.02,7.013,17]heptadec-5-en-17-yl]methylacetate	TFC	0.443519	0.231784
[(1S,2S,3S,7R,9R,13S,14R,15R,17S)-3,15-diacetyloxy-7-hydroxy-2,6,14-trimethyl-4,11,16-trioxo-10-oxatetracyclo[7.7.1.02,7.013,17]heptadec-5-en-17-yl]methylacetate	ABTS	0.433333	0.243952
[(1S,2S,3S,7R,9R,13S,14R,15R,17S)-3,15-diacetyloxy-7-hydroxy-2,6,14-trimethyl-4,11,16-trioxo-10-oxatetracyclo[7.7.1.02,7.013,17]heptadec-5-en-17-yl]methylacetate	DPPH	0.451887	0.222039
[(1S,2S,3S,7R,9R,13S,14R,15R,17S)-3,15-diacetyloxy-7-hydroxy-2,6,14-trimethyl-4,11,16-trioxo-10-oxatetracyclo[7.7.1.02,7.013,17]heptadec-5-en-17-yl]methylacetate	FRAP	0.383333	0.308495
[(1S,2S,3S,7R,9R,13S,14R,15R,17S)-3,15-diacetyloxy-7-hydroxy-2,6,14-trimethyl-4,11,16-trioxo-10-oxatetracyclo[7.7.1.02,7.013,17]heptadec-5-en-17-yl]methylacetate	OH	0.516667	0.15439
Resveratrol	TPC	0.4	0.286105
Resveratrol	TFC	0.426782	0.251957
Resveratrol	ABTS	0.433333	0.243952
Resveratrol	DPPH	0.493728	0.17676
Resveratrol	FRAP	0.483333	0.18747
Resveratrol	OH	0.45	0.224216
Methyl Alpha-D-Galactopyranoside	TPC	0.433333	0.243952
Methyl Alpha-D-Galactopyranoside	TFC	0.476992	0.194179
Methyl Alpha-D-Galactopyranoside	ABTS	0.516667	0.15439
Methyl Alpha-D-Galactopyranoside	DPPH	0.443519	0.231784
Methyl Alpha-D-Galactopyranoside	FRAP	0.45	0.224216
Methyl Alpha-D-Galactopyranoside	OH	0.433333	0.243952
Coumaroyl Quinic Acid	TPC	-0.85	0.00370478
Coumaroyl Quinic Acid	TFC	-0.928878	0.000294526
Coumaroyl Quinic Acid	ABTS	-0.966667	2.15503e-05
Coumaroyl Quinic Acid	DPPH	-0.912142	0.000606851
Coumaroyl Quinic Acid	FRAP	-0.966667	2.15503e-05
Coumaroyl Quinic Acid	OH	-0.85	0.00370478
3-O-p-Coumaroylquinic acid	TPC	-0.85	0.00370478
3-O-p-Coumaroylquinic acid	TFC	-0.928878	0.000294526
3-O-p-Coumaroylquinic acid	ABTS	-0.966667	2.15503e-05
3-O-p-Coumaroylquinic acid	DPPH	-0.912142	0.000606851
3-O-p-Coumaroylquinic acid	FRAP	-0.966667	2.15503e-05
3-O-p-Coumaroylquinic acid	OH	-0.85	0.00370478
L-Fucose	TPC	0.483333	0.18747
L-Fucose	TFC	0.393309	0.29499
L-Fucose	ABTS	0.4	0.286105
L-Fucose	DPPH	0.476992	0.194179
L-Fucose	FRAP	0.416667	0.264586
L-Fucose	OH	0.483333	0.18747
Aloebarbendol	TPC	0.383333	0.308495
Aloebarbendol	TFC	0.460255	0.212522
Aloebarbendol	ABTS	0.516667	0.15439
Aloebarbendol	DPPH	0.502096	0.168397
Aloebarbendol	FRAP	0.516667	0.15439
Aloebarbendol	OH	0.433333	0.243952
Kaempferide-3-O-(3''-Z-p-coumaroylarabinoside)	TPC	0.466667	0.205386
Kaempferide-3-O-(3''-Z-p-coumaroylarabinoside)	TFC	0.48536	0.185354
Kaempferide-3-O-(3''-Z-p-coumaroylarabinoside)	ABTS	0.4	0.286105
Kaempferide-3-O-(3''-Z-p-coumaroylarabinoside)	DPPH	0.426782	0.251957
Kaempferide-3-O-(3''-Z-p-coumaroylarabinoside)	FRAP	0.433333	0.243952
Kaempferide-3-O-(3''-Z-p-coumaroylarabinoside)	OH	0.466667	0.205386
Cryptochlorogenic acid (4-O-Caffeoylquinic acid)	TPC	-0.95	8.76252e-05
Cryptochlorogenic acid (4-O-Caffeoylquinic acid)	TFC	-0.928878	0.000294526
Cryptochlorogenic acid (4-O-Caffeoylquinic acid)	ABTS	-0.916667	0.000506619
Cryptochlorogenic acid (4-O-Caffeoylquinic acid)	DPPH	-0.861932	0.00280593
Cryptochlorogenic acid (4-O-Caffeoylquinic acid)	FRAP	-0.866667	0.0024954
Cryptochlorogenic acid (4-O-Caffeoylquinic acid)	OH	-0.9	0.000943062
4-(3-hydroxy-2-(4-(3-hydroxyprop-1-en-1-yl)phenoxy)propyl)-2-methoxyphenol glucoside	TPC	-0.416667	0.264586
4-(3-hydroxy-2-(4-(3-hydroxyprop-1-en-1-yl)phenoxy)propyl)-2-methoxyphenol glucoside	TFC	-0.426782	0.251957
4-(3-hydroxy-2-(4-(3-hydroxyprop-1-en-1-yl)phenoxy)propyl)-2-methoxyphenol glucoside	ABTS	-0.433333	0.243952
4-(3-hydroxy-2-(4-(3-hydroxyprop-1-en-1-yl)phenoxy)propyl)-2-methoxyphenol glucoside	DPPH	-0.510465	0.160267
4-(3-hydroxy-2-(4-(3-hydroxyprop-1-en-1-yl)phenoxy)propyl)-2-methoxyphenol glucoside	FRAP	-0.45	0.224216
4-(3-hydroxy-2-(4-(3-hydroxyprop-1-en-1-yl)phenoxy)propyl)-2-methoxyphenol glucoside	OH	-0.516667	0.15439
Phycoerythrobilin	TPC	0.85	0.00370478
Phycoerythrobilin	TFC	0.878669	0.0018158
Phycoerythrobilin	ABTS	0.916667	0.000506619
Phycoerythrobilin	DPPH	0.937247	0.000191631
Phycoerythrobilin	FRAP	0.916667	0.000506619
Phycoerythrobilin	OH	0.9	0.000943062
Kaempferide	TPC	0.457693	0.215412
Kaempferide	TFC	0.468123	0.203784
Kaempferide	ABTS	0.508548	0.162109
Kaempferide	DPPH	0.468123	0.203784
Kaempferide	FRAP	0.474644	0.196696
Kaempferide	OH	0.457693	0.215412
Chrysoeriol	TPC	0.457693	0.215412
Chrysoeriol	TFC	0.468123	0.203784
Chrysoeriol	ABTS	0.508548	0.162109
Chrysoeriol	DPPH	0.468123	0.203784
Chrysoeriol	FRAP	0.474644	0.196696
Chrysoeriol	OH	0.457693	0.215412
Persicoside	TPC	-0.42379	0.255659
Persicoside	TFC	-0.468123	0.203784
Persicoside	ABTS	-0.42379	0.255659
Persicoside	DPPH	-0.468123	0.203784
Persicoside	FRAP	-0.457693	0.215412
Persicoside	OH	-0.474644	0.196696
4-p-Coumaroylquinic acid	TPC	-0.9	0.000943062
4-p-Coumaroylquinic acid	TFC	-0.928878	0.000294526
4-p-Coumaroylquinic acid	ABTS	-0.916667	0.000506619
4-p-Coumaroylquinic acid	DPPH	-0.912142	0.000606851
4-p-Coumaroylquinic acid	FRAP	-0.966667	2.15503e-05
4-p-Coumaroylquinic acid	OH	-0.9	0.000943062
Rubiprasin A	TPC	0.864531	0.00263237
Rubiprasin A	TFC	0.876667	0.00191891
Rubiprasin A	ABTS	0.932337	0.000248221
Rubiprasin A	DPPH	0.961781	3.46167e-05
Rubiprasin A	FRAP	0.898434	0.000994195
Rubiprasin A	OH	0.915386	0.000533717
Rubianol-g	TPC	0.466667	0.205386
Rubianol-g	TFC	0.460255	0.212522
Rubianol-g	ABTS	0.4	0.286105
Rubianol-g	DPPH	0.401677	0.2839
Rubianol-g	FRAP	0.433333	0.243952
Rubianol-g	OH	0.416667	0.264586
Val-Val-Leu	TPC	0.915386	0.000533717
Val-Val-Leu	TFC	0.910713	0.000641193
Val-Val-Leu	ABTS	0.949289	9.20002e-05
Val-Val-Leu	DPPH	0.927735	0.000311077
Val-Val-Leu	FRAP	0.983192	1.99397e-06
Val-Val-Leu	OH	0.864531	0.00263237
Machilusolide D	TPC	-0.96624	2.25207e-05
Machilusolide D	TFC	-0.885179	0.001507
Machilusolide D	ABTS	-0.881483	0.00167742
Machilusolide D	DPPH	-0.919224	0.000455428
Machilusolide D	FRAP	-0.915386	0.000533717
Machilusolide D	OH	-0.915386	0.000533717
Acerosin	TPC	-0.508548	0.162109
Acerosin	TFC	-0.425567	0.253457
Acerosin	ABTS	-0.457693	0.215412
Acerosin	DPPH	-0.451101	0.222945
Acerosin	FRAP	-0.440741	0.235069
Acerosin	OH	-0.457693	0.215412
Dambonitol	TPC	0.474644	0.196696
Dambonitol	TFC	0.468123	0.203784
Dambonitol	ABTS	0.474644	0.196696
Dambonitol	DPPH	0.442589	0.23288
Dambonitol	FRAP	0.457693	0.215412
Dambonitol	OH	0.42379	0.255659
5,7,3'-Trihydroxy-6,4',5'-trimethoxyflavone	TPC	-0.96624	2.25207e-05
5,7,3'-Trihydroxy-6,4',5'-trimethoxyflavone	TFC	-0.936247	0.000202335
5,7,3'-Trihydroxy-6,4',5'-trimethoxyflavone	ABTS	-0.881483	0.00167742
5,7,3'-Trihydroxy-6,4',5'-trimethoxyflavone	DPPH	-0.868156	0.00240285
5,7,3'-Trihydroxy-6,4',5'-trimethoxyflavone	FRAP	-0.864531	0.00263237
5,7,3'-Trihydroxy-6,4',5'-trimethoxyflavone	OH	-0.915386	0.000533717
Vladinol D	TPC	0.916667	0.000506619
Vladinol D	TFC	0.895405	0.00109853
Vladinol D	ABTS	0.833333	0.00526569
Vladinol D	DPPH	0.903774	0.000827411
Vladinol D	FRAP	0.933333	0.0002359
Vladinol D	OH	0.916667	0.000506619
Xanthurenic acid	TPC	0.833333	0.00526569
Xanthurenic acid	TFC	0.962352	3.28586e-05
Xanthurenic acid	ABTS	0.966667	2.15503e-05
Xanthurenic acid	DPPH	0.903774	0.000827411
Xanthurenic acid	FRAP	0.916667	0.000506619
Xanthurenic acid	OH	0.883333	0.0015905
Picein	TPC	-0.474644	0.196696
Picein	TFC	-0.493657	0.176832
Picein	ABTS	-0.42379	0.255659
Picein	DPPH	-0.417055	0.264095
Picein	FRAP	-0.508548	0.162109
Picein	OH	-0.42379	0.255659
2-Oxoheptanedionic acid	TPC	-0.898434	0.000994195
2-Oxoheptanedionic acid	TFC	-0.919224	0.000455428
2-Oxoheptanedionic acid	ABTS	-0.915386	0.000533717
2-Oxoheptanedionic acid	DPPH	-0.902201	0.000874322
2-Oxoheptanedionic acid	FRAP	-0.949289	9.20002e-05
2-Oxoheptanedionic acid	OH	-0.847579	0.00390855
4-Hydroxybenzoyl acetyl glucoside	TPC	0.457693	0.215412
4-Hydroxybenzoyl acetyl glucoside	TFC	0.468123	0.203784
4-Hydroxybenzoyl acetyl glucoside	ABTS	0.508548	0.162109
4-Hydroxybenzoyl acetyl glucoside	DPPH	0.468123	0.203784
4-Hydroxybenzoyl acetyl glucoside	FRAP	0.474644	0.196696
4-Hydroxybenzoyl acetyl glucoside	OH	0.457693	0.215412
