# Supplementary material for: Revealing the key antioxidant compounds and potential action mechanisms of Pinus koraiensis pinecones by integrating UPLC-MS- based widely targeted metabolomics, network pharmacology, and molecular docking approaches
Source: Research Square preprint supplement (doi:10.21203/rs.3.rs-6712981/v1), 2025-06-25
Supplement: Supplementary file 4 [file 7af12541c551af610a305aea.docx]

**Supplementary Materials**





**Fig. S1** UPLC-Q TRAP-MS/MS chromatograms of *Pinus koraiensis* pinecones. (A, B) TIC of *Pinus koraiensis* pinecones in positive and negative ionization modes. (C, D) MRM detection maps in positive and negative ionization modes.





**Fig. S2** (A-C) Orthogonal partial least squares discriminant analysis (OPLS-DA) score plots: (A) D-DFH vs. D-DL, (B) D-DFH vs. D-LSH, (C) D-LSH vs. D-DL. R2Y values indicate the model’s explanatory power for the Y matrix, while Q2 values represent predictive performance. A model is considered effective when Q2 > 0.5, and excellent when Q2 > 0.9. (D-F) OPLS-DA model validation plots for (D) D-DFH vs. D-DL, (E) D-DFH vs. D-LSH, and (F) D-LSH vs. D-DL.
