# Supplementary material for: Revealing the key antioxidant compounds and potential action mechanisms of Pinus koraiensis pinecones by integrating UPLC-MS- based widely targeted metabolomics, network pharmacology, and molecular docking approaches
Source: Research Square preprint supplement (doi:10.21203/rs.3.rs-6712981/v1), 2025-06-25
Supplement: Supplementary file 5 [file 958cac4f05b6835b31c838b0.xlsx]

## Sheet: P-LSH VS P-DFH
Differential metabolite list for the P-LSH vs. P-DHL comparison.
Index	Compounds	Class I	Class II	Formula	Level	CAS	P-DFH-1	P-DFH-2	P-DFH-3	P-LSH-1	P-LSH-2	P-LSH-3	VIP	P-value	FDR	Fold_Change	Log2FC	Type
Layp006138	5-Hydroxy-3',4',7-trimethoxyflavone glucoside	Flavonoids	Flavones	C24H26O11	2	-	533541	519567	717799	914728	1.47931e+06	1.25185e+06	1.16166	0.0479258	0.107671	0.485728	-1.04178	down
pme0170	N-Acetyl-L-Arginine	Amino acids and derivatives	Amino acids and derivatives	C8H16N4O3	3	155-84-0	2.42653e+06	3.11851e+06	3.33878e+06	6.01107e+06	5.74208e+06	6.19118e+06	1.24585	0.0026621	0.0188543	0.495077	-1.01428	down
Wbsp000037	1-[3-(4-methyl-6-oxocyclohex-1-en-1-yl)propyl]pyrrolidin-2-one	Others	Ketone compounds	C14H21NO2	3	-	336603	383434	382803	920629	884763	993396	1.2848	0.000660418	0.00946113	0.394042	-1.34358	down
Wbsp013361	serratenediol	Terpenoids	Triterpene	C30H50O2	3	2239-24-9	34819.9	38926.1	21938.6	72337.5	78330.7	100262	1.1974	0.0108595	0.0423979	0.381319	-1.39093	down
Zjhp090604	5,7-dihydroxy-3-(4'-hydroxybenzyl)-chroman-4-one	Flavonoids	Other Flavonoids	C16H14O5	1	-	620364	428266	666296	4.86007e+06	6.18415e+06	4.81445e+06	1.28075	0.00769486	0.0351252	0.108138	-3.20905	down
Wbsp001110	hupcrispatine	Alkaloids	Alkaloids	C10H10N2O	1	-	4.53669e+08	4.3621e+08	4.80756e+08	2.01347e+08	2.00952e+08	2.14245e+08	1.28872	0.00110054	0.0121836	2.22309	1.15257	up
Lmhp009890	LysoPC 20:3	Lipids	LPC	C28H52NO7P	2	1199257-41-4	1.22573e+07	1.28783e+07	1.35107e+07	3.15965e+07	3.14909e+07	2.58337e+07	1.2745	0.0105501	0.0419191	0.434614	-1.20219	down
Zahp008363	5-hydroxyl-3',4',7,8-tetramethoxyflavone*	Flavonoids	Flavones	C19H18O7	1	13003-74-2	74762.9	53066.1	58337.1	202150	212269	223096	1.2753	7.49331e-05	0.00346027	0.292018	-1.77587	down
pmp000169	Andrographidine D aglycone	Flavonoids	Flavanones	C19H18O7	2	-	114330	103859	136904	424167	533711	623087	1.27203	0.017023	0.0546783	0.224605	-2.15454	down
Zmjp010694	5-Hydroxy-3,7,3',4'-tetramethoxyflavone (Retusin)*	Flavonoids	Flavonols	C19H18O7	1	1245-15-4	74762.9	53066.1	58337.1	202150	212269	223096	1.2753	7.49331e-05	0.00346027	0.292018	-1.77587	down
Lskp211333	14-Didehydrovouacapane-5a-ol	Terpenoids	Ditepenoids	C20H26O2	3	-	4.99736e+06	5.59225e+06	6.28831e+06	1.24741e+07	9.61776e+06	1.24165e+07	1.23753	0.0148175	0.0512551	0.489097	-1.03181	down
mws0040	Chrysin	Flavonoids	Flavones	C15H10O4	1	480-40-0	1.08209e+07	1.02563e+07	9.2405e+06	3.01256e+07	3.73209e+07	3.8767e+07	1.28019	0.00935127	0.0388808	0.285441	-1.80873	down
Hamp007385	5-hydroxy-7,8-dimethoxyflavanone	Others	Others	C17H16O5	2	-	598980	333644	535782	4.18247e+06	4.84856e+06	3.58255e+06	1.27251	0.00732305	0.033949	0.116415	-3.10266	down
Zahp011689	2,2-dimethylchromene-6-carboxylic acid*	Others	Others	C12H12O3	2	34818-56-9	6.68304e+06	7.30932e+06	8.86633e+06	2.11105e+07	1.72658e+07	1.85837e+07	1.26279	0.00246963	0.0181255	0.401311	-1.31721	down
Lagp008266	Anhydrotuberosin	Flavonoids	Isoflavones	C20H16O4	3	41347-49-3	614184	929042	601179	3.86942e+06	3.52928e+06	4.456e+06	1.27278	0.00285457	0.0195574	0.180891	-2.46681	down
Lmjp005871	Penduletin (5,4'-Dihydroxy-3,6,7-trimethoxyflavone)	Flavonoids	Flavonols	C18H16O7	3	569-80-2	1.54581e+06	1.56391e+06	1.40208e+06	5.11181e+06	6.51086e+06	5.72688e+06	1.28507	0.00804683	0.0358045	0.260053	-1.94312	down
mws1474	5,7-Dihydroxy-3',4',5'-trimethoxyflavone	Flavonoids	Flavones	C18H16O7	3	18103-42-9	1.2426e+06	1.18306e+06	1.28833e+06	4.16952e+06	5.8126e+06	4.6601e+06	1.27979	0.0170981	0.0547953	0.253649	-1.97909	down
Cmxp005429	Okanin	Flavonoids	Chalcones	C15H12O6	3	484-76-4	612166	515219	646009	281671	176602	415681	1.07307	0.0297693	0.0757059	2.02916	1.02089	up
pmp000006	Eupatilin*	Flavonoids	Flavones	C18H16O7	1	22368-21-4	65176.3	73950.9	74718	201892	324404	277658	1.2624	0.0306051	0.0770705	0.265992	-1.91055	down
Smbp005175	Rivularin*	Flavonoids	Flavones	C18H16O7	1	70028-59-0	65176.3	73950.9	74718	201892	324404	277658	1.2624	0.0306051	0.0770705	0.265992	-1.91055	down
HJAP058	5,6,7,4'-Tetramethoxyflavanone	Flavonoids	Flavanones	C19H20O6	2	2569-77-9	249540	290213	197537	806028	970380	931118	1.27068	0.00119941	0.0124794	0.272311	-1.87667	down
Zmap009745	3,7,4'-Tri-O-methylquercetin*	Flavonoids	Flavonols	C18H16O7	3	572-32-7	2.59616e+06	2.01712e+06	2.13344e+06	5.19546e+06	5.16218e+06	4.98013e+06	1.27161	0.00141725	0.0137975	0.439877	-1.18483	down
Cmsp008655	Pinosylvin methyl ether	Others	Stilbene	C15H14O2	2	35302-70-6	2.83799e+07	2.94425e+07	3.06734e+07	5.68617e+07	6.141e+07	6.15173e+07	1.28767	0.000636609	0.00944248	0.49222	-1.02262	down
Smhp011040	ageconyflavone B	Flavonoids	Flavones	C19H18O7	3	-	240039	210410	241494	721181	772934	782698	1.28892	0.000135833	0.00444953	0.303908	-1.71829	down
pmp001251	LysoPC 18:2(2n isomer)	Lipids	LPC	C26H50NO7P	1	-	1.71561e+07	1.73356e+07	2.04235e+07	7.69942e+07	7.59778e+07	7.33397e+07	1.28937	3.0143e-06	0.00134906	0.242653	-2.04303	down
Zbsp005521	Chrysin-5-O-glucoside (Toringin)*	Flavonoids	Flavones	C21H20O9	1	1329-10-8	1.08753e+07	1.04756e+07	1.08298e+07	734597	724539	466995	1.28663	1.27618e-06	0.000903856	16.7074	4.06242	up
Lamp009626	3-(4-methoxybenzylidene)-5,7-dihydroxy-6-methoxychroman-4-one glucoside	Flavonoids	Other Flavonoids	C24H26O11	2	-	3.51155e+06	3.63708e+06	3.31818e+06	7.17668e+06	7.79637e+06	6.87335e+06	1.28385	0.00240118	0.0177612	0.479109	-1.06157	down
Layp007667	Bauhinoxepin I	Others	Alcohol compounds	C16H14O5	3	-	581521	413109	579605	4.86783e+06	5.9639e+06	5.09833e+06	1.28584	0.00397169	0.0233925	0.0988216	-3.33903	down
Lahp002608	3,5-Dihydro-2H-Furo[3,2-C]Quinolin-4-One*	Alkaloids	Quinoline alkaloids	C11H9NO2	1	-	5.24111e+06	5.09848e+06	5.22062e+06	2.1537e+06	2.32149e+06	2.3412e+06	1.29079	5.44532e-06	0.00134906	2.28277	1.19078	up
Wcdp001953	2-methyl-1-nitronaphthalene	Others	Others	C11H9NO2	1	881-03-8	5.24111e+06	5.09848e+06	5.22062e+06	2.1537e+06	2.32149e+06	2.3412e+06	1.29079	5.44532e-06	0.00134906	2.28277	1.19078	up
Smcp001137	naphthisoxazol A*	Alkaloids	Alkaloids	C11H9NO2	1	-	4.49056e+06	4.93586e+06	4.4315e+06	1.88951e+06	1.97175e+06	1.78833e+06	1.28753	0.00150212	0.0141848	2.4529	1.29449	up
Hmmp001310	3-Indoleacrylic acid*	Alkaloids	Plumerane	C11H9NO2	1	1204-06-4	4.49056e+06	4.93586e+06	4.4315e+06	1.88951e+06	1.97175e+06	1.78833e+06	1.28753	0.00150212	0.0141848	2.4529	1.29449	up
Lahp001956	Pyran[3,4-b]indole-2-ketone	Alkaloids	Plumerane	C11H9O2N	3	-	4.49056e+06	4.93586e+06	4.4315e+06	1.88951e+06	1.97175e+06	1.78833e+06	1.28753	0.00150212	0.0141848	2.4529	1.29449	up
Hmgp002327	3-amino-2-naphthoic acid*	Alkaloids	Alkaloids	C11H9NO2	1	-	5.24111e+06	5.09848e+06	5.22062e+06	2.1537e+06	2.32149e+06	2.3412e+06	1.29079	5.44532e-06	0.00134906	2.28277	1.19078	up
Waqkp05977	2-g-linolenoyl-glycerol	Lipids	Glycerol ester	C21H36O4	2	-	1.0478e+06	856674	884885	5.58062e+06	5.27932e+06	5.4201e+06	1.29034	6.34664e-06	0.00134906	0.171336	-2.5451	down
Wbkp008219	(3S,3'S)-N,N'-((1R,2R)-5-((3,4,5-trihydroxy-6-methyltetrahydro-2H-pyran-2-yl)oxy)cyclohex-3-ene-1,2-diyl)bis(2-methyl-2,3,4,9-tetrahydro-1H-pyrido[3,4-b]indole-3-carboxamide)	Alkaloids	Alkaloids	C38H46N6O7	3	-	6.3269e+06	7.86379e+06	7.52437e+06	2.85611e+07	3.56349e+07	3.5178e+07	1.28311	0.00600782	0.0303634	0.218518	-2.19417	down
Zmjp006741	Chrysosplenoside E*	Flavonoids	Flavonols	C25H28O13	1	-	943427	735548	791004	5.53741e+06	4.7193e+06	4.90948e+06	1.28774	0.00211301	0.0164917	0.162861	-2.61829	down
Zmjp006451	3,6,7,4'-tetramethylquercetagetin 3'-O-beta-D-glucoside*	Flavonoids	Flavonols	C25H28O13	1	-	904835	859182	831637	5.32509e+06	4.87751e+06	4.81911e+06	1.29241	0.00125745	0.0127683	0.172794	-2.53288	down
Zmjp004311	Chrysosplenetin-4'-O-glucoside*	Flavonoids	Flavonols	C25H28O13	1	23279-19-8	904835	859182	831637	5.32509e+06	4.87751e+06	4.81911e+06	1.29241	0.00125745	0.0127683	0.172794	-2.53288	down
Zazp002547	cyclo-(Gly-Phe)	Amino acids and derivatives	Amino acids and derivatives	C11H12N2O2	2	10125-07-2	4.71851e+06	4.86826e+06	4.71329e+06	1.74223e+06	1.85647e+06	1.77613e+06	1.29249	4.60041e-06	0.00134906	2.66056	1.41173	up
Hmhp005846	Tenaxin I*	Flavonoids	Flavones	C18H16O7	1	86926-52-5	69693	70948.4	66986.5	273025	269800	248050	1.29199	0.00132495	0.0130769	0.26253	-1.92945	down
Zmhp004065	7,8-Dihydroxy-5,6,4'-trimethoxyflavone*	Flavonoids	Flavones	C18H16O7	1	-	69693	70948.4	66986.5	273025	269800	248050	1.29199	0.00132495	0.0130769	0.26253	-1.92945	down
Wcjp002598	8-hydroxyquinoline	Alkaloids	Quinoline alkaloids	C9H7NO	1	148-24-3	6.32903e+07	6.4423e+07	5.41511e+07	2.43155e+07	2.94042e+07	2.4984e+07	1.27022	0.00280085	0.019448	2.31075	1.20836	up
Yalp008917	(3R,5R,7R,8R,10S,13S,17R)-17-((S)-7,7-dimethyl-2,3,6,7-tetrahydrooxepin-3-yl)-4,4,8,10,13-pentamethyl-2,3,4,5,6,7,8,9,10,11,12,13,16,17-tetradecahydro-1H-cyclopenta[a]phenanthrene-3,7-diyl diacetate	Terpenoids	Triterpene	C34H52O5	3	-	40975.5	52955.8	35242.2	137709	107463	97163.7	1.23126	0.0163248	0.0539371	0.37733	-1.4061	down
Hasp010605	MG(18:3(9Z,12Z,15Z)/0:0/0:0)	Lipids	Glycerol ester	C21H36O4	1	129828-41-7	919792	732950	883779	7.61566e+06	8.11111e+06	1.00419e+07	1.28805	0.0087027	0.0376408	0.0984342	-3.3447	down
Zbsp005869	7,4'-Dihydroxy-3,5,3'-trimethoxyflavone*	Flavonoids	Flavonols	C18H16O7	2	13459-09-1	13784.3	15333.4	16455.7	57088.6	73735.7	67019.1	1.28388	0.00772433	0.0351252	0.230351	-2.1181	down
Lcfp043780	eurycorymboside A	Phenolic acids	Phenolic acids	C15H18O8	3	-	217538	208094	248155	506829	411032	432772	1.25889	0.00806329	0.0358045	0.498867	-1.00327	down
Zmjp005959	Chrysosplenoside A*	Flavonoids	Flavonols	C24H26O13	1	-	249004	273924	287029	1.86277e+06	1.76587e+06	1.74866e+06	1.29217	0.000185167	0.00534621	0.150625	-2.73096	down
MWSmce591	Curcumenol*	Terpenoids	Sesquiterpenoids	C15H22O2	2	19431-84-6	1.00813e+06	1.11661e+06	1.06378e+06	448815	516070	396953	1.27102	0.000208938	0.00538605	2.34133	1.22733	up
ML10195036	3-Dehydrosphinganine	Lipids	Sphingolipids	C18H37NO2	3	16105-69-4	1.25342e+06	523367	658106	395491	243701	321712	1.07149	0.155464	0.249677	2.53396	1.3414	up
Zmgp004297	7-(4-Hydroxyphenyl)-1-phenyl-4-hepten-3-one	Others	Ketone compounds	C19H20O2	2	100667-52-5	325056	458865	393195	266468	164458	151075	1.12977	0.0203225	0.0598479	2.02253	1.01616	up
Zjyp102907	8-hydroxy-1,4a-dimethyl-7-(prop-1-en-2-yl)-4,4a,5,6,7,8-hexahydronaphthalen-2(3H)-one*	Terpenoids	Sesquiterpenoids	C15H22O2	2	-	768892	801275	1.06715e+06	287235	299321	370997	1.25277	0.0210087	0.0611127	2.75422	1.46164	up
Lmhp010190	LysoPC 18:1(2n isomer)	Lipids	LPC	C26H52NO7P	1	-	4.75217e+06	5.69652e+06	6.13776e+06	1.31936e+07	1.55568e+07	1.35138e+07	1.26959	0.00174206	0.0149698	0.392447	-1.34943	down
Wbmp010456	Macrophypene B	Terpenoids	Ditepenoids	C18H28O2	3	-	978657	959699	1.25084e+06	3.93054e+06	3.30562e+06	3.822e+06	1.2772	0.00138276	0.0135548	0.288402	-1.79385	down
Wbmp010544	10-Hydroxymethyllycaconitine	Alkaloids	Alkaloids	C37H50N2O11	1	-	5.76579e+06	8.25858e+06	7.47265e+06	2.86959e+07	3.03401e+07	3.64308e+07	1.27483	0.00527886	0.0279012	0.225178	-2.15086	down
zjzp122816	5,7,2',4'-Tetrahydroxyflavanone	Flavonoids	Flavanones	C15H12O6	3	-	1.86304e+07	1.84298e+07	2.17281e+07	4.7983e+07	5.57065e+07	4.69057e+07	1.27723	0.00364291	0.0224828	0.390373	-1.35707	down
pma1303	LysoPC 16:2*	Lipids	LPC	C24H46NO7P	3	-	446466	327979	424761	141301	145197	110642	1.25977	0.012439	0.0464492	3.0196	1.59436	up
Hmcp002298	Limocitrin-3-O-arabinoside	Flavonoids	Flavonols	C22H22O12	3	-	53267.5	54813.8	194177	278516	378132	349033	1.09583	0.0188433	0.0572781	0.300551	-1.73432	down
MWSHC2071	Cosmosaldehyde	Others	Others	C15H22O2	3	1234203-35-0	1.48884e+06	1.82414e+06	1.60283e+06	742356	608473	755827	1.26475	0.00393973	0.0233011	2.33346	1.22247	up
Sayp005824	Isocurcumenol*	Terpenoids	Sesquiterpenoids	C15H22O2	1	24063-71-6	4.38363e+06	4.10899e+06	4.8887e+06	2.19317e+06	2.05485e+06	1.91272e+06	1.27626	0.00454707	0.0252425	2.17203	1.11905	up
Qmyp101120	Procurcumenol*	Terpenoids	Sesquiterpenoids	C15H22O2	1	21698-40-8	4.38363e+06	4.10899e+06	4.8887e+06	2.19317e+06	2.05485e+06	1.91272e+06	1.27626	0.00454707	0.0252425	2.17203	1.11905	up
MWSmce251	N-Benzoyl-(2R,3S)-3-phenylisoserine	Amino acids and derivatives	Amino acids and derivatives	C16H15NO4	3	132201-33-3	1.82551e+06	1.47323e+06	1.74809e+06	604206	533475	613333	1.27942	0.0068501	0.0326157	2.88223	1.52719	up
Smdp007779	8-Demethylfarrerol	Flavonoids	Flavanones	C16H14O5	2	-	825594	624197	740538	5.44248e+06	6.80959e+06	5.58527e+06	1.28697	0.00610911	0.0306864	0.122795	-3.02568	down
MWS20147	Luteolin-3'-O-glucoside	Flavonoids	Flavones	C21H20O11	2	5154-41-6	2.92417e+07	3.68478e+07	2.58429e+07	7.00313e+06	6.37451e+06	7.85984e+06	1.27647	0.0171617	0.0548747	4.32877	2.11396	up
Lhlp120611	Hydroxycarvone	Terpenoids	Monoterpenoids	C10H14O2	3	-	1.17137e+06	1.94301e+06	1.38499e+06	692403	515751	981679	1.08439	0.0577671	0.122863	2.05467	1.0389	up
Ladp004214	Kumatakenin rhamnoside	Flavonoids	Flavonols	C23H24O10	2	-	533246	890010	438118	1.35298e+06	978913	1.43579e+06	1.08102	0.0319556	0.079552	0.494036	-1.01731	down
Qacp005275	3-Hydroxy-1,2-dimethoxyxanthone-glucoside*	Others	Xanthone	C21H22O10	3	-	2.20659e+06	3.01214e+06	2.95528e+06	985587	1.03677e+06	1.18096e+06	1.25649	0.0195233	0.0583433	2.55174	1.35148	up
Lcyp000673	Prudomestin	Flavonoids	Flavonols	C17H14O7	3	3443-28-5	245257	201340	263286	471421	595306	469588	1.24231	0.0115101	0.0440648	0.462068	-1.11382	down
Wagp010987	Gossypetin 3,7,8,3',4'-pentamethyl ether*	Flavonoids	Flavonols	C20H20O8	2	-	58650.9	34691.1	44383.7	279588	293488	305673	1.27674	1.85934e-05	0.0021948	0.156729	-2.67365	down
Zmmp003957	Phe-Glu-Leu	Amino acids and derivatives	Amino acids and derivatives	C20H29N3O6	3	-	158791	146976	75136	1.36768e+06	1.21124e+06	1.40152e+06	1.2682	0.000540318	0.00894985	0.0956939	-3.38543	down
Wcgp010223	3-(Cyclohexen-1-yl)-2-hydroxy-4a,5-dimethyl-2,3,4,5,6,7,8,8a-octahydronaphthalen-1-one	Others	Others	C18H28O2	3	-	975646	1.20831e+06	1.02331e+06	4.06073e+06	3.61154e+06	4.18867e+06	1.28439	0.00119198	0.0124794	0.270405	-1.8868	down
MWSprf117	5-Hydroxytryptophan	Amino acids and derivatives	Amino acids and derivatives	C11H12N2O3	1	4350-09-8	2.57377e+06	2.44832e+06	2.48948e+06	985700	982750	849234	1.28672	1.58015e-05	0.0021317	2.66587	1.4146	up
Qmxp101524	11β-Hydroxy-8,15-isopimaradiene-3-one*	Terpenoids	Ditepenoids	C20H30O2	2	-	1.37855e+07	1.4509e+07	1.13241e+07	4.4878e+06	4.32151e+06	4.82211e+06	1.27853	0.0107763	0.0423431	2.90642	1.53924	up
Lmyp005841	Chrysin-7-O-glucoside*	Flavonoids	Flavones	C21H20O9	1	31025-53-3	7.8183e+06	1.11884e+07	1.36032e+07	547319	664068	668311	1.28403	0.0257316	0.0696252	17.3485	4.11674	up
Lcfp007308	5,7-Dihydroxy-3,3',4',5'-tetramethoxyflavone*	Flavonoids	Flavones	C19H18O8	1	14585-04-7	40176	24157.5	41989.3	98826.4	159234	167942	1.22042	0.032351	0.0801139	0.249583	-2.00241	down
mws1175	Pinostrobin	Flavonoids	Flavanones	C16H14O4	2	480-37-5	1.89546e+06	2.48527e+06	2.58918e+06	1.11951e+06	1.13635e+06	1.13071e+06	1.24758	0.0311275	0.0780993	2.0581	1.04132	up
Lmzp004885	Tricin	Flavonoids	Flavones	C17H14O7	3	520-32-1	198169	235055	212534	411515	493994	424520	1.26649	0.00564363	0.0293365	0.485522	-1.04239	down
MWSHY0054	Eupatorin; 3',5-Dihydroxy-4',6,7-Trimethoxyflavone*	Flavonoids	Flavones	C18H16O7	1	855-96-9	1.57165e+06	1.24346e+06	1.34508e+06	5.05374e+06	6.77949e+06	5.38035e+06	1.27766	0.0123228	0.046239	0.24168	-2.04883	down
Wagp008723	Mikanin*	Flavonoids	Flavonols	C18H16O7	1	4324-53-2	1.44644e+06	1.4362e+06	1.41423e+06	4.76681e+06	6.70353e+06	5.48941e+06	1.28023	0.0174303	0.0550816	0.253356	-1.98076	down
Zbsp002100	Catechin-(4α→8)-gallocatechin	Flavonoids	Flavanols	C30H26O13	1	-	588074	576556	926444	2.36598e+06	1.08262e+06	1.74608e+06	1.09869	0.097061	0.178438	0.402541	-1.31279	down
Hmhp005160	Rehderianin I*	Flavonoids	Flavones	C17H14O7	1	90965-30-3	15430.9	38754.1	18083.1	48310.4	86257.6	53697.5	1.0773	0.0615118	0.128988	0.383862	-1.38134	down
Wdgp005371	3-alpha(S)-Strictosidine	Alkaloids	Plumerane	C27H34N2O9	2	20824-29-7	1.35348e+07	1.50257e+07	1.32826e+07	5.47448e+06	5.60157e+06	5.94656e+06	1.28714	0.00267927	0.0189286	2.45809	1.29754	up
Wagp009375	3,5,6,7-Tetramethoxyflavone*	Flavonoids	Flavonols	C19H18O6	2	75413-07-9	219868	160394	194082	571633	780583	659840	1.26741	0.0108801	0.0423979	0.285451	-1.80868	down
MWSHC2050	4',5,6,7-Tetramethoxyflavone*	Flavonoids	Flavones	C19H18O6	2	1168-42-9	219868	160394	194082	571633	780583	659840	1.26741	0.0108801	0.0423979	0.285451	-1.80868	down
Zbsp003661	Pachypodol	Flavonoids	Flavones	C18H16O7	3	33708-72-4	205341	245940	325714	935541	731359	701089	1.24332	0.0084298	0.0367976	0.328124	-1.60769	down
Sazp010264	Monogalactosyldiacylglycerol	Lipids	Glycerol ester	C45H70O10	1	-	96371.2	76943.8	63184.4	188939	181623	185280	1.24535	0.00609322	0.0306679	0.42548	-1.23284	down
MWSslk002	Sophoricoside	Flavonoids	Isoflavones	C21H20O10	3	152-95-4	1.7231e+06	1.45041e+06	1.83492e+06	509188	455230	362604	1.27252	0.00404544	0.0235818	3.77419	1.91617	up
Lmgp004731	Genistein-7-O-galactoside	Flavonoids	Isoflavones	C21H20O10	3	-	1.42855e+06	1.6354e+06	1.47373e+06	462757	374350	332278	1.27863	0.000347806	0.00670296	3.8804	1.95621	up
MWSHY0189	Apigenin 7-O-beta-D-glucoside*	Flavonoids	Flavones	C21H20O10	1	578-74-5	1.42855e+06	1.6354e+06	1.47373e+06	462757	374350	332278	1.27863	0.000347806	0.00670296	3.8804	1.95621	up
MWS20148	Apigenin-4'-O-glucoside*	Flavonoids	Flavones	C21H20O10	1	-	1.42855e+06	1.6354e+06	1.47373e+06	462757	374350	332278	1.27863	0.000347806	0.00670296	3.8804	1.95621	up
Wahlp08069	LysoPC 17:2(2n isomer)*	Lipids	LPC	C25H48NO7P	3	-	51691.6	77130	73159	233561	339007	251228	1.2576	0.0191488	0.0575596	0.245183	-2.02807	down
pmb0818	5-Methoxyindoleacetate	Alkaloids	Plumerane	C11H11NO3	3	3471-31-6	8.15311e+06	7.96517e+06	8.52626e+06	3.02212e+06	3.26308e+06	3.36194e+06	1.28962	6.13004e-05	0.00343869	2.5546	1.3531	up
MWS20190	5,7,4'-trihydroxy-6,3',5'-trimethoxyisoflavone*	Flavonoids	Isoflavones	C18H16O8	3	-	98683.7	155966	131789	449579	546322	402803	1.25556	0.00805858	0.0358045	0.276283	-1.85578	down
Safp001796	4-Hydroxy-l-tryptophan	Amino acids and derivatives	Amino acids and derivatives	C11H12N2O3	1	25242-90-4	3.97741e+06	3.68113e+06	3.61979e+06	1.57888e+06	1.49862e+06	1.37766e+06	1.28651	0.000333726	0.00670296	2.53152	1.34	up
Hmqp006235	LysoPC 18:4	Lipids	LPC	C26H46NO7P	3	-	573433	559818	534393	3.50039e+06	3.52241e+06	4.02266e+06	1.29194	0.00285801	0.0195574	0.15098	-2.72757	down
Lmhp007840	LysoPC 19:2	Lipids	LPC	C27H52NO7P	3	-	324115	328682	592282	1.32265e+06	1.2436e+06	1.2345e+06	1.22277	0.0064086	0.0313568	0.327587	-1.61005	down
pmb0492	N',N'',N'''-p-Coumaroyl-cinnamoyl-caffeoyl spermidine	Alkaloids	Phenolamine	C34H37N3O6	3	-	204639	147638	126140	366591	358808	330245	1.21741	0.00601267	0.0303634	0.453198	-1.14179	down
Wagp002398	Tryptophan N-Rutinoside	Amino acids and derivatives	Amino acids and derivatives	C23H32N2O11	1	-	229198	354410	271612	986191	748292	783277	1.24541	0.00734022	0.033949	0.339675	-1.55777	down
pme3011	4-Aminobutanoate	Organic acids	Organic acids	C4H9NO2	2	56-12-2	1.16003e+06	1.17871e+06	1.18769e+06	3.62998e+06	3.64936e+06	3.34904e+06	1.29197	0.00157129	0.0143134	0.331794	-1.59164	down
pmb0865	LysoPC 18:3(2n isomer)	Lipids	LPC	C26H48NO7P	1	-	2.12034e+07	2.0156e+07	2.20114e+07	6.69994e+07	9.00684e+07	7.41562e+07	1.28111	0.0140891	0.0499192	0.274066	-1.8674	down
Lajp006633	5,8-dihydroxy-6,7,3',4'-tetramethoxyflavone-8-O-β-D-glucoside*	Flavonoids	Flavones	C25H28O13	1	-	617717	720918	823830	5.03407e+06	4.46537e+06	4.58301e+06	1.2877	0.000708413	0.00978992	0.153558	-2.70315	down
Wagp007602	Demethoxysudachitin*	Flavonoids	Flavones	C17H14O7	1	4323-80-2	23457.3	25462	28098.9	34469.2	84249	66783.3	1.07526	0.13015	0.220655	0.415189	-1.26816	down
Lajp004824	Medicarpinglucoside	Flavonoids	Isoflavones	C22H24O9	3	-	1.99914e+06	1.67097e+06	2.54589e+06	434553	416044	491473	1.27469	0.0230613	0.064943	4.63166	2.21153	up
Lmlp005572	Galangin 7-glucoside	Flavonoids	Flavonols	C21H20O10	1	-	1.99914e+06	1.67097e+06	2.54589e+06	434553	416044	491473	1.27469	0.0230613	0.064943	4.63166	2.21153	up
Lmhp008718	LysoPC 17:2*	Lipids	LPC	C25H48NO7P	3	-	89546.8	76481.4	85045.4	261626	289477	276689	1.28833	0.000294636	0.00654802	0.303305	-1.72116	down
Zmhp004269	Scullcapflavone II	Flavonoids	Flavones	C19H18O8	1	55084-08-7	133477	91355	89906.5	582170	631970	564416	1.27897	8.50585e-05	0.00354369	0.176963	-2.49848	down
pmp001013	1,2,3,6,7-Pentamethoxyxanthone	Flavonoids	Other Flavonoids	C18H18O7	2	-	555000	479839	432102	1.58776e+06	2.26515e+06	1.88095e+06	1.27213	0.0160106	0.0533263	0.255838	-1.9667	down
MWSslk210	Irigenin*	Flavonoids	Isoflavones	C18H16O8	3	548-76-5	139537	153275	119421	452248	602845	516332	1.27638	0.00970673	0.0397806	0.26233	-1.93054	down
pmp000013	Eupatilin-7-O-glucoside	Flavonoids	Flavones	C24H26O12	1	-	514526	623116	660770	5.02921e+06	4.5451e+06	3.53879e+06	1.28288	0.0126238	0.046872	0.137146	-2.86621	down
Wbmp002283	Α-hydroxyquinoline	Alkaloids	Alkaloids	C9H7NO	1	-	5.98869e+07	6.51703e+07	5.78465e+07	2.84767e+07	2.85255e+07	2.54179e+07	1.28287	0.00105922	0.0121836	2.21916	1.15001	up
Wcfp001236	Quinoline	Others	Others	C9H7N	2	91-22-5	8.11884e+06	8.34862e+06	7.96038e+06	3.9628e+06	3.89417e+06	3.63855e+06	1.2898	1.01543e-05	0.00159817	2.12499	1.08746	up
mws0567	4-Guanidinobutanoate	Organic acids	Organic acids	C5H11N3O2	3	463-00-3	8.67949e+06	8.13149e+06	7.92615e+06	3.89976e+06	3.16877e+06	3.67852e+06	1.27717	0.000117954	0.00417703	2.30176	1.20274	up
Lhhp111111	Schisantherin E	Lignans and Coumarins	Lignans	C30H34O9	3	64917-83-5	655611	401520	410095	1.33658e+06	1.13924e+06	875019	1.1653	0.022996	0.0648881	0.437868	-1.19143	down
MW0155971	Pro-Pro-Asn	Amino acids and derivatives	Amino acids and derivatives	C14H22N4O5	3	-	611787	399984	687244	1.27885e+06	1.28072e+06	1.47463e+06	1.20729	0.00255664	0.0183831	0.421153	-1.24758	down
pme2244	3-Indolepropionic acid	Alkaloids	Plumerane	C11H11NO2	3	830-96-6	1.85979e+06	1.95125e+06	1.78223e+06	835939	803772	856414	1.28966	0.00100109	0.011768	2.24078	1.164	up
Zmhp002734	5,7,2',5'-Tetrahydroxy-8,6'-dimethoxyflavone*	Flavonoids	Flavones	C17H14O8	2	-	630304	737158	616444	1.47525e+06	1.63896e+06	1.64895e+06	1.27891	0.000361962	0.00688213	0.41651	-1.26358	down
pmp000238	Luteolin-6-C-arabinoside-7-O-glucoside	Flavonoids	Flavones	C26H28O15	3	-	864112	760125	1.33447e+06	1.64882e+06	2.83927e+06	2.19754e+06	1.12663	0.0491748	0.109954	0.442547	-1.1761	down
Hmgp003130	Iristectorigenin A	Flavonoids	Isoflavones	C17H14O7	3	39012-01-6	28122.1	20019.7	10701.3	75961	65467.6	57489	1.17667	0.00317714	0.0205232	0.295817	-1.75722	down
pmp000004	4',5,7-Trihydroxy-3',6-dimethoxyflavone (Jaceosidin)*	Flavonoids	Flavones	C17H14O7	1	18085-97-7	28122.1	20019.7	10701.3	75961	65467.6	57489	1.17667	0.00317714	0.0205232	0.295817	-1.75722	down
mws1715	Cordycepin*	Nucleotides and derivatives	Nucleotides and derivatives	C10H13N5O3	3	73-03-0	4.50002e+06	4.86893e+06	4.6481e+06	486753	379799	461083	1.29086	0.000244782	0.00603015	10.5579	3.40025	up
MWStz040	Pterolactam*	Alkaloids	Pyrrole alkaloids	C5H9NO2	1	38072-88-7	2.73102e+06	2.93568e+06	2.49385e+06	8.67967e+06	8.64335e+06	8.49803e+06	1.28934	6.31175e-05	0.00343869	0.316043	-1.66181	down
MWS00330g	1-Amino-1-cyclobutane-carboxylic-acid*	Amino acids and derivatives	Amino acids and derivatives	C5H9NO2	1	22264-50-2	2.73102e+06	2.93568e+06	2.49385e+06	8.67967e+06	8.64335e+06	8.49803e+06	1.28934	6.31175e-05	0.00343869	0.316043	-1.66181	down
Yacp000453	3-hydroxy-1-methylpyrrolidin-2-one*	Alkaloids	Pyrrole alkaloids	C5H9NO2	1	132996-63-5	2.73102e+06	2.93568e+06	2.49385e+06	8.67967e+06	8.64335e+06	8.49803e+06	1.28934	6.31175e-05	0.00343869	0.316043	-1.66181	down
pme0006	L-Proline*	Amino acids and derivatives	Amino acids and derivatives	C5H9NO2	1	147-85-3	2.73102e+06	2.93568e+06	2.49385e+06	8.67967e+06	8.64335e+06	8.49803e+06	1.28934	6.31175e-05	0.00343869	0.316043	-1.66181	down
pme2292	Putrescine	Alkaloids	Alkaloids	C4H12N2	3	110-60-1	697445	757360	725146	2.12267e+06	2.27232e+06	2.29165e+06	1.29133	0.000477827	0.00835607	0.326016	-1.61699	down
Wasdp09220	2,3-Dehydro-4-oxo-beta-ionol	Terpenoids	Monoterpenoids	C13H18O2	3	-	246009	158451	148482	474584	594765	651268	1.23233	0.00593674	0.0303041	0.321363	-1.63773	down
MWSmce116	5'-Deoxyadenosine*	Nucleotides and derivatives	Nucleotides and derivatives	C10H13N5O3	3	4754-39-6	6.7161e+06	6.53273e+06	6.91248e+06	680861	613731	624915	1.29312	0.00020913	0.00538605	10.5034	3.39278	up
Lamp000484	4-Methylazetidine-2-Carboxylic acid*	Alkaloids	Alkaloids	C5H9NO2	1	1779725-63-1	2.87768e+06	2.91974e+06	2.72344e+06	9.10038e+06	9.3201e+06	8.81514e+06	1.29237	9.56616e-05	0.00371246	0.312857	-1.67642	down
Hmyp002656	Methyl dioxindole-3-acetate	Alkaloids	Plumerane	C11H11NO4	1	57061-18-4	1.1413e+08	1.08818e+08	1.10027e+08	2.38478e+07	2.31424e+07	2.37073e+07	1.2934	0.000270895	0.00644913	4.70985	2.23568	up
Lahp003986	3,4-Dihydro-4-(4'-hydroxyphenyl)-5,7-dihydroxycoumarin glucoside	Lignans and Coumarins	Coumarins	C21H22O10	3	-	2.20659e+06	1.40259e+06	2.95528e+06	990551	1.03677e+06	714390	1.11605	0.0982167	0.179979	2.39429	1.2596	up
Lmlp006175	Isosalipurposide (Phlorizin Chalcone)	Flavonoids	Chalcones	C21H22O10	3	4547-85-7	2.20659e+06	1.40259e+06	2.95528e+06	990551	1.03677e+06	714390	1.11605	0.0982167	0.179979	2.39429	1.2596	up
Hmpp003270	Luteolin-4'-O-glucoside*	Flavonoids	Flavones	C21H20O11	2	6920-38-3	3.42193e+07	1.93679e+07	3.09493e+07	7.82624e+06	7.68159e+06	4.36489e+06	1.21812	0.0345001	0.084185	4.2539	2.08879	up
Lmsp004915	Aureusidin-4-O-glucoside*	Flavonoids	Aurones	C21H20O11	2	-	3.42193e+07	1.93679e+07	3.09493e+07	7.82624e+06	7.68159e+06	4.36489e+06	1.21812	0.0345001	0.084185	4.2539	2.08879	up
MWSHY0136	Kaempferol 3-O-glucoside*	Flavonoids	Flavonols	C21H20O11	2	480-10-4	3.42193e+07	1.93679e+07	3.09493e+07	7.82624e+06	7.68159e+06	4.36489e+06	1.21812	0.0345001	0.084185	4.2539	2.08879	up
Lmtp003948	3',5',5,7-Tetrahydroxy-4'-methoxyflavanone-3'-O-glucoside	Flavonoids	Flavanones	C22H24O12	2	-	603484	833359	777962	2.95612e+06	1.77057e+06	3.79682e+06	1.21162	0.0680909	0.138479	0.259847	-1.94427	down
Lmpp003465	Myricetin-3-O-β-D-glucoside*	Flavonoids	Flavonols	C21H20O13	1	19833-12-6	603484	833359	777962	2.95612e+06	1.77057e+06	3.79682e+06	1.21162	0.0680909	0.138479	0.259847	-1.94427	down
pmp001012	6-Hydroxy-1,2,3,7-tetramethoxyxanthone	Flavonoids	Other Flavonoids	C17H16O7	2	64756-87-2	191358	198022	230199	442665	475157	401697	1.26913	0.00196216	0.0159278	0.469549	-1.09065	down
pme3961	Deoxyadenosine*	Nucleotides and derivatives	Nucleotides and derivatives	C10H13N5O3	3	958-09-8	8.79486e+06	8.88997e+06	7.82843e+06	848186	830282	1.0087e+06	1.29094	0.00155137	0.0142745	9.49447	3.24709	up
Lmmp001947	Gossypetin-3-O-glucoside*	Flavonoids	Flavonols	C21H20O13	1	-	521596	385052	707422	3.16127e+06	1.77261e+06	3.68287e+06	1.22428	0.0514035	0.11254	0.187318	-2.41644	down
Lmdp002969	Myricetin-3-O-galactoside*	Flavonoids	Flavonols	C21H20O13	1	15648-86-9	521596	385052	707422	3.16127e+06	1.77261e+06	3.68287e+06	1.22428	0.0514035	0.11254	0.187318	-2.41644	down
pmp001310	6-Hydroxykaempferol-3,6-O-diglucoside	Flavonoids	Flavonols	C27H30O17	3	142674-16-6	191687	193014	258400	82274.2	102881	90096.8	1.24597	0.0242138	0.0667293	2.33641	1.2243	up
Qmyp010506	2,4,6-Trihydroxybenzophenone	Others	Ketone compounds	C13H10O4	3	3555-86-0	1.36431e+07	9.49886e+06	1.56983e+07	6.36109e+06	6.12265e+06	6.518e+06	1.18639	0.0677531	0.138189	2.04403	1.03142	up
Ljmp121505	Mansonone S	Terpenoids	Sesquiterpenoids	C15H18O3	3	-	1.44248e+06	1.52678e+06	1.5828e+06	725841	727882	551073	1.26019	0.000534532	0.00894985	2.27059	1.18306	up
pmp000573	Acacetin-7-O-galactoside*	Flavonoids	Flavones	C22H22O10	3	-	184412	158328	212248	366700	355160	406932	1.25123	0.000981482	0.0117155	0.491665	-1.02425	down
Lmdp007998	Xanthomicrol*	Flavonoids	Flavones	C18H16O7	2	16545-23-6	11884.6	35737.2	22742.9	78017.2	104625	66447.1	1.14968	0.0165947	0.0539506	0.282488	-1.82374	down
Wagp006511	7-Demethyltangeretin	Flavonoids	Flavones	C19H18O7	3	73213-66-8	22874.4	57740.4	56968.8	157002	102619	154359	1.12031	0.0167677	0.0540962	0.332344	-1.58925	down
Wagp009074	Santin*	Flavonoids	Flavonols	C18H16O7	2	27782-63-4	18518.4	17482.7	11863	49501.2	79357	64059.5	1.24572	0.0250777	0.0683574	0.248107	-2.01097	down
Wacyp04721	Rhodioloside F	Terpenoids	Monoterpenoids	C21H36O11	3	-	148971	126995	152187	827513	1.43213e+06	1.07995e+06	1.27632	0.0309034	0.0776147	0.128205	-2.96348	down
MWSHY0098	(-)-Epigallocatechin	Flavonoids	Flavanols	C15H14O7	2	970-74-1	1.87475e+06	1.8051e+06	2.15759e+06	4.24569e+06	4.47506e+06	3.79253e+06	1.27066	0.00207422	0.0163684	0.466499	-1.10005	down
Wadp008130	7-Oxo-3-hydroxypimaric acid	Terpenoids	Ditepenoids	C20H28O4	3	-	754768	1.65681e+06	737080	3.00576e+06	3.10189e+06	2.01129e+06	1.10998	0.0238318	0.0659977	0.387817	-1.36655	down
Lcfp197430	3,4-dihydroxyallylbenzene	Others	Others	C12H14O2	3	-	457639	678356	570442	2.15484e+06	1.36184e+06	1.63847e+06	1.23261	0.0311667	0.0780993	0.331016	-1.59503	down
WaTKp08991	4-Phenylhept-6-enoic acid	Phenolic acids	Phenolic acids	C13H16O2	3	-	2.10193e+06	2.06383e+06	2.10855e+06	934665	961863	935337	1.29318	1.71334e-06	0.000970779	2.21561	1.14771	up
pma0461	14,15-Dehydrocrepenynic acid	Lipids	Free fatty acids	C18H28O2	3	4154-44-3	1.07476e+06	974610	1.02965e+06	4.30998e+06	3.47188e+06	4.84703e+06	1.28038	0.0150528	0.0514612	0.243807	-2.03619	down
pmb0881	LysoPE 18:2	Lipids	LPE	C23H44NO7P	2	-	832659	367344	1.02509e+06	2.15424e+06	1.37534e+06	2.17016e+06	1.06479	0.0273199	0.071871	0.390386	-1.35703	down
Lmjp007279	Penduletin 4'-Methyl Ether (5-Hydroxy-3,6,7,4'-Tetramethoxyflavone)	Flavonoids	Flavonols	C19H18O7	2	14787-34-9	2.58404e+06	2.36523e+06	2.56559e+06	9.01369e+06	9.57784e+06	1.03772e+07	1.29024	0.00238024	0.0176875	0.259413	-1.94668	down
WaTKp07197	3-Methyl-6-prop-1-en-2-ylcyclohex-3-en-1-ol	Terpenoids	Monoterpenoids	C10H16O	3	20019-62-9	1.57926e+06	1.43747e+06	1.67013e+06	3.30976e+06	3.84789e+06	2.93085e+06	1.25902	0.0163729	0.0539371	0.464575	-1.10602	down
Zmjp009119	Chrysosplenetin (5,4'-Dihydroxy-3,6,7,3'-tetramethoxyflavone)*	Flavonoids	Flavones	C19H18O8	1	603-56-5	48640.8	47634.5	16839.2	176901	191145	185134	1.19515	0.00188686	0.0157166	0.20448	-2.28997	down
pme0295	4-Acetamidobutanoate	Organic acids	Organic acids	C6H11NO3	3	3025-96-5	311444	88862.4	125372	708575	716926	538497	1.14345	0.00650615	0.0314538	0.267657	-1.90154	down
Sasp001236	7-Hydroxy-tryptophan	Amino acids and derivatives	Amino acids and derivatives	C11H12N2O3	1	-	3.98359e+06	3.74006e+06	3.59879e+06	1.96689e+06	1.67124e+06	1.85262e+06	1.27848	0.000243082	0.00603015	2.06209	1.04411	up
Hajp008429	4',5-dihydroxy-7-methoxy-6-methylfavanone*	Flavonoids	Flavones	C17H16O5	2	-	786045	316249	417994	3.91396e+06	4.97868e+06	3.85139e+06	1.25315	0.00434771	0.0243902	0.119294	-3.06741	down
Wahlp07175	5,7-Dimethoxy-4'-hydroxyflavanone	Flavonoids	Flavones	C17H16O5	2	26207-67-0	631729	378491	632891	4.14461e+06	5.41899e+06	3.82999e+06	1.27105	0.013025	0.047848	0.122679	-3.02704	down
Zmmp003443	γ-Glu-Trp	Amino acids and derivatives	Amino acids and derivatives	C16H19N3O5	3	66471-20-3	4.20734e+06	4.7681e+06	5.05349e+06	2.11693e+06	2.47873e+06	2.27953e+06	1.26906	0.00462694	0.0254504	2.04052	1.02893	up
pmb0819	3-Indoleacetonitrile	Alkaloids	Plumerane	C10H8N2	3	771-51-7	2.13545e+06	2.24337e+06	2.2077e+06	1.05467e+06	1.04494e+06	987751	1.29092	2.44992e-05	0.00266947	2.13337	1.09314	up
MWSslk244	Casticin (5,3'-Dihydroxy-3,6,7,4'-Tetramethoxyflavone)	Flavonoids	Flavonols	C19H18O8	3	479-91-4	19882.7	17563.7	14415.2	58171.5	41401.5	46507.5	1.25077	0.0167509	0.0540962	0.35502	-1.49403	down
Lmhp007598	LysoPC 19:2(2n isomer)	Lipids	LPC	C27H52NO7P	3	-	335617	357598	492407	1.18904e+06	1.37851e+06	1.33549e+06	1.26587	0.000315883	0.00665822	0.303769	-1.71896	down
Wasyqp1805	L-Kynurenine	Alkaloids	Alkaloids	C10H12N2O3	3	2922-83-0	139519	118987	164197	37849.2	45953.3	30888.6	1.26203	0.00982051	0.0400309	3.68559	1.88189	up
MWSHY0130	Taxifolin-7-O-rhamnoside	Flavonoids	Flavanonols	C21H22O11	3	137592-12-2	67880.2	54753.6	85607	85191	177182	194037	1.01713	0.126321	0.215843	0.456258	-1.13208	down
HJAP006	Syringetin-7-O-glucoside*	Flavonoids	Flavonols	C23H24O13	1	-	355596	509059	338452	1.08302e+06	824255	886282	1.21824	0.00704877	0.0332819	0.430673	-1.21534	down
pma0134	D-Threose	Others	Saccharides	C4H8O4	3	95-43-2	2.16126e+06	1.7277e+06	1.91557e+06	5.41166e+06	5.47117e+06	4.05687e+06	1.25526	0.0167723	0.0540962	0.388531	-1.3639	down
Zmjp004875	Tomentin	Flavonoids	Flavonols	C17H14O8	3	59171-23-2	351415	168600	358770	1.15372e+06	1.23599e+06	1.04441e+06	1.21838	0.000551604	0.00894985	0.255898	-1.96636	down
pmb0374	2-Aminopurine	Nucleotides and derivatives	Nucleotides and derivatives	C5H5N5	2	452-06-2	3.43223e+06	4.03468e+06	7.81861e+06	1.05747e+07	1.00888e+07	1.16634e+07	1.09563	0.0421734	0.0981885	0.472842	-1.08057	down
MWSmce024	Scopolin	Lignans and Coumarins	Coumarins	C16H18O9	3	531-44-2	428165	294393	362994	1.15513e+06	1.16953e+06	1.13192e+06	1.272	0.00123862	0.0126715	0.314054	-1.67091	down
pmb0645	Hesperetin-6-C-glucoside-7-O-glucoside	Flavonoids	Flavanones	C28H34O16	3	-	531562	1.02018e+06	820514	404972	328602	452062	1.0902	0.10019	0.182532	2.00083	1.0006	up
MWStz602	Quercetagetin-7-O-glucoside(Quercetagitrin)*	Flavonoids	Flavonols	C21H20O13	1	548-75-4	573693	980157	692520	2.72877e+06	1.91527e+06	2.23135e+06	1.22819	0.0104231	0.0417069	0.326726	-1.61385	down
Layp005773	Ageconyflavone B-4'-glucoside	Flavonoids	Flavones	C25H28O12	3	-	197103	90150.8	227538	351090	362368	374402	1.05941	0.04135	0.0967338	0.473215	-1.07943	down
MWSHY0022	Flavokawain C*	Flavonoids	Chalcones	C17H16O5	3	37308-75-1	35915	48130	21825.9	355582	559781	443834	1.26728	0.0181149	0.0559859	0.0778922	-3.68238	down
MWS201439	Phe-His	Amino acids and derivatives	Amino acids and derivatives	C15H18N4O3	3	16874-81-0	115819	125788	118310	35124.5	54004	72812.4	1.15424	0.0200119	0.0592411	2.22251	1.15219	up
MWSHY0176	Farrerol*	Flavonoids	Flavanones	C17H16O5	2	24211-30-1	373812	373812	373812	4.02712e+06	4.77452e+06	3.88398e+06	1.29193	0.0050911	0.0271621	0.0884022	-3.49977	down
Ljmp121501	Mansonone N	Terpenoids	Sesquiterpenoids	C16H22O4	3	-	184078	133285	205983	406354	733861	727314	1.21128	0.0487621	0.109204	0.280234	-1.83529	down
Zapp009018	2',6'-dimethoxy-4,4'-di-hydroxychalcone*	Flavonoids	Chalcones	C17H16O5	3	123316-64-3	14719.3	14719.3	14719.3	480551	534091	445015	1.29313	0.00299699	0.0199779	0.0302522	-5.04682	down
MWStz383	Gardenin D*	Flavonoids	Flavones	C19H18O8	1	29202-00-4	21078.1	73538.3	56708.9	193163	230275	265738	1.16632	0.0031489	0.0205232	0.219574	-2.18722	down
Hmmp007513	5,7-Dihydroxy-6,3',4',5'-tetramethoxyflavone (Arteanoflavone)*	Flavonoids	Flavones	C19H18O8	1	68710-17-8	21078.1	73538.3	56708.9	193163	230275	265738	1.16632	0.0031489	0.0205232	0.219574	-2.18722	down
Lmhp011562	1-α-Linolenoyl-glycerol*	Lipids	Glycerol ester	C21H36O4	3	-	595420	699957	455213	257103	213472	217849	1.23886	0.0337561	0.0829412	2.5429	1.34647	up
Wagp009413	5,7-Dihydroxy-3,4',6,8-tetramethoxyflavone*	Flavonoids	Flavonols	C19H18O8	1	50461-86-4	31966.1	36411.2	45877.9	219844	161504	206147	1.27491	0.00931549	0.0388501	0.194479	-2.36232	down
Wagp006988	4'-Hydroxy-5,6,7,8-Tetramethoxyflavone	Flavonoids	Flavones	C19H18O7	3	36950-98-8	109429	120000	123080	380667	381199	292663	1.27451	0.0140693	0.0499192	0.334281	-1.58087	down
Lmgp005640	Isorhamnetin-3-O-Galactoside; Cacticin	Flavonoids	Flavonols	C22H22O12	3	6743-92-6	309964	312310	595975	827785	1.37803e+06	782891	1.10097	0.0719017	0.144364	0.407617	-1.29471	down
Zbsp010780	Methyl [6]-Gingerdiol 5-acetate	Phenolic acids	Phenolic acids	C20H32O5	3	-	25145.3	35886.3	51309.5	284515	388606	318665	1.26762	0.00778208	0.0352746	0.113272	-3.14214	down
MW0011974	10S,17S-dihydroxy-4Z,7Z,11E,13Z,15E,19Z-docosahexaenoic acid	Lipids	Free fatty acids	C22H32O4	3	871826-47-0	756552	996180	818484	284738	247633	184868	1.25938	0.00642528	0.0313842	3.58488	1.84193	up
MWS20172	5-Hydroxymethyl-2-furaldehyde*	Others	Aldehyde compounds	C6H6O3	2	67-47-0	248683	349516	429010	758211	1.29112e+06	1.35871e+06	1.19626	0.0444528	0.102054	0.301408	-1.73021	down
Lmhp009590	LysoPC 17:1	Lipids	LPC	C25H50NO7P	3	-	75623.4	31051	38456.3	143796	129902	191696	1.168	0.0122848	0.046239	0.311844	-1.6811	down
Lmjp004404	Quercetagetin-3-Methyl Ether	Flavonoids	Flavonols	C16H12O8	3	64190-88-1	49177.4	95465.3	58133.9	181159	185584	106463	1.09541	0.0517256	0.112987	0.428517	-1.22258	down
MWS1734	4-Methoxybenzoate	Phenolic acids	Phenolic acids	C8H8O3	3	100-09-4	440724	485808	372497	1.1561e+06	1.17044e+06	1.22129e+06	1.27806	0.000167258	0.00515047	0.366147	-1.44951	down
mws1377	2,3'-Bipyridine	Alkaloids	Pyridine alkaloids	C10H8N2	3	581-50-0	477218	502129	422252	259619	191626	216058	1.24787	0.00153756	0.0142745	2.10039	1.07066	up
Cmsp002787	3,4'-Dihydroxy-3',5'-dimethoxypropiophenone	Others	Ketone compounds	C11H14O5	2	136196-47-9	2.42116e+06	3.11746e+06	3.10792e+06	6.47249e+06	9.10744e+06	6.8621e+06	1.24444	0.0236075	0.0658268	0.385283	-1.37601	down
ML10198935	N-Methylserotonin	Alkaloids	Plumerane	C11H14N2O	3	1134-01-6	4311.63	4311.63	4311.63	34444.9	38229.4	22154.6	1.27538	0.030171	0.0763848	0.136402	-2.87406	down
Lmxp006440	2-Palmitoylglycerol	Lipids	Glycerol ester	C19H38O4	3	23470-00-0	92962.1	124202	103476	13602.7	13602.7	13602.7	1.2894	0.00954201	0.0392915	7.85729	2.97403	up
MWS2085	Ethyl isobutyrate*	Organic acids	Organic acids	C6H12O2	3	97-62-1	33095.6	38989.5	55097.2	6619.13	6619.13	6619.13	1.27676	0.0321618	0.0798041	6.40479	2.67915	up
Lmqp007331	Kaempferol-3-O-(3''-O-p-Coumaroyl)rhamnoside*	Flavonoids	Flavonols	C30H26O12	2	-	4687.23	4687.23	4687.23	89587.4	23436.2	39615.5	1.22129	0.146122	0.239364	0.0921239	-3.44028	down
Lmyp008134	5-Hydroxy-2-methyl anthraquinone	Quinones	Anthraquinone	C15H10O3	3	68963-22-4	241332	286527	312460	37562.9	37562.9	37562.9	1.29007	0.00726223	0.0338386	7.45701	2.8986	up
Yalp002169	Schumanniofioside A	Others	Chromone	C16H18O9	3	128396-15-6	677346	569469	601761	1.25219e+06	1.38412e+06	1.26679e+06	1.2774	0.000295851	0.00654802	0.473617	-1.07821	down
Smjp001498	Hypaphorine	Alkaloids	Plumerane	C14H18N2O2	3	487-58-1	56389.5	33117.3	54999.9	6573.42	6573.42	6573.42	1.27394	0.0312951	0.0781824	7.32783	2.87339	up
Sacp008038	acorenone*	Terpenoids	Sesquiterpenoids	C15H24O	1	5956-05-8	98616.3	98616.3	98616.3	896205	1.2203e+06	1.11158e+06	1.28992	0.00935995	0.0388808	0.0916486	-3.44774	down
Lagp007132	7,3',4'-Trihydroxyquercetin*	Flavonoids	Flavonols	C18H16O7	3	6068-80-0	2.55048e+06	2.30916e+06	2.20583e+06	5.09238e+06	5.53601e+06	5.28647e+06	1.2844	8.00631e-05	0.00348952	0.443955	-1.17152	down
Qmdp112301	Viterofolin C	Terpenoids	Ditepenoids	C20H32O2	3	-	53470.9	53470.9	53470.9	682778	462294	703484	1.28579	0.018296	0.0561422	0.0867773	-3.52654	down
Safp009309	N-hexanoylsphinganine	Lipids	Free fatty acids	C24H49NO3	1	-	36747.7	43819.7	29265.8	5344.36	5344.36	5344.36	1.28417	0.0175853	0.0552318	6.85041	2.77619	up
Wayp001104	N-(1-Deoxy-1-fructosyl)Tyrosine	Amino acids and derivatives	Amino acids and derivatives	C15H21NO8	2	-	562341	689234	582848	62203.6	62203.6	62203.6	1.2918	0.00508749	0.0271621	9.8302	3.29722	up
Lmjp007881	Artemisinate*	Terpenoids	Sesquiterpenoids	C15H22O2	3	80286-58-4	37154	37154	37154	214697	220704	185770	1.29122	0.00400428	0.0234382	0.179439	-2.47844	down
Lmjp003231	Patuletin-3-O-glucoside*	Flavonoids	Flavonols	C22H22O13	1	-	248870	160755	314272	484488	1.34495e+06	1.41719e+06	1.12889	0.103892	0.186756	0.222969	-2.16509	down
Wbjp002330	1,3-dihydroxy-2,3,3a,4-tetrahydropyrrolo[2,1-b]quinazolin-9(1H)-one	Alkaloids	Alkaloids	C11H12N2O3	2	-	1.31158e+06	1.2955e+06	1.35157e+06	524718	799892	508930	1.21344	0.0150769	0.0514612	2.15902	1.11038	up
Wagp007236	7-Hydroxy-3',4',5,6-tetramethoxyflavone*	Flavonoids	Flavones	C19H18O7	3	40983-99-1	9634.38	9634.38	9634.38	53463.8	48171.9	62198.3	1.28901	0.00816624	0.036092	0.176417	-2.50294	down
Lajp002810	Procyanidin A4	Tannins	Proanthocyanidins	C30H24O13	2	111466-29-6	1.87473e+06	1.16842e+06	1.36747e+06	215697	215697	215697	1.28001	0.0269616	0.0713852	6.81607	2.76894	up
Lmtp005226	Santalol	Terpenoids	Sesquiterpenoids	C15H24O	3	11031-45-1	55814.4	55814.4	55814.4	873799	914820	966148	1.29345	0.000958081	0.0117155	0.0607831	-4.04019	down
Lhgp102103	Labda-8(17),12-diene-15-ol-16-al	Terpenoids	Ditepenoids	C20H32O2	2	-	17937	17937	17937	385057	332149	300701	1.29218	0.00581465	0.0298998	0.0528644	-4.24156	down
Qayp009909	Kolavenic Acid	Terpenoids	Ditepenoids	C20H32O2	3	25436-90-2	67216.2	67216.2	67216.2	1.13185e+06	805550	1.1071e+06	1.28949	0.0120302	0.0456246	0.0662337	-3.91629	down
MWSmce680	Mequinol	Others	Others	C7H8O2	3	150-76-5	236123	261880	153392	468117	388878	663137	1.14117	0.0554048	0.118882	0.428512	-1.22259	down
Zahp001902	Delphinidin-3-O-sambubioside	Flavonoids	Anthocyanidins	C26H29O16+	3	53158-73-9	12431.8	12431.8	12431.8	168055	216783	237496	1.29021	0.0109568	0.0425213	0.0599282	-4.06062	down
Zmjp006969	Pectolinarigenin*	Flavonoids	Flavones	C17H14O6	1	520-12-7	6.36737e+06	7.00086e+06	6.56267e+06	1.40089e+07	1.39997e+07	1.42299e+07	1.29	0.00012144	0.00418289	0.471866	-1.08355	down
Zbgp007629	3',4'-Dihydroxy-7,5'-dimethoxyflavone*	Flavonoids	Flavones	C17H14O6	1	-	6.36737e+06	7.00086e+06	6.56267e+06	1.40089e+07	1.39997e+07	1.42299e+07	1.29	0.00012144	0.00418289	0.471866	-1.08355	down
Lmbp002255	Fraxetin-8-O-glucoside (Fraxin)	Lignans and Coumarins	Coumarins	C16H18O10	3	524-30-1	469090	357991	328232	39927.4	39927.4	39927.4	1.28784	0.0150718	0.0514612	9.64512	3.2698	up
Lmbp002309	Sinapaldehyde-4-O-Glucoside	Others	Aldehyde compounds	C17H22O9	2	154461-65-1	469090	357991	328232	39927.4	39927.4	39927.4	1.28784	0.0150718	0.0514612	9.64512	3.2698	up
Lmdp008003	3',5-Dihydroxy-3,4',5',7-tetramethoxyflavone*	Flavonoids	Flavones	C19H18O8	1	14290-57-4	30786.6	30786.6	30786.6	180428	229099	163360	1.28586	0.0147838	0.0512551	0.161218	-2.63292	down
Lmqp007185	Kaempferol-3-O-(4''-O-p-Coumaroyl)rhamnoside*	Flavonoids	Flavonols	C30H26O12	2	-	27816.1	10926.5	28509.9	2185.29	2185.29	2185.29	1.24514	0.0721166	0.144693	10.2584	3.35873	up
MWStz382	Spinacetin*	Flavonoids	Flavonols	C17H14O8	2	3153-83-1	42922.9	42922.9	42922.9	402013	403104	419241	1.29363	0.000232515	0.00588139	0.105172	-3.24917	down
HJAP005	Laricitrin-3-O-glucoside*	Flavonoids	Flavonols	C22H22O13	1	39986-90-8	796912	721285	447184	1.35277e+06	1.23232e+06	1.50133e+06	1.16026	0.00741639	0.0341082	0.480954	-1.05603	down
Wbtp005510	Methyl 8-hydroxy-2-methoxy-6-methyl-9-oxoxanthene-1-carboxylate	Others	Xanthone	C17H14O6	3	-	3.12522e+07	3.38391e+07	4.11994e+07	6.25043e+06	6.25043e+06	6.25043e+06	1.28795	0.010267	0.0414258	5.66844	2.50295	up
Qmjp080407	14(15)-Bisnor-13-oxolabd-8(17),11(E)-dien-19-oic acid	Terpenoids	Sesquiterpenoids	C18H26O3	3	-	289570	253507	397241	18678.9	18678.9	18678.9	1.28792	0.020788	0.0606582	16.7804	4.0687	up
Lmyp004084	Perillyl alcohol*	Terpenoids	Monoterpenoids	C10H16O	1	57717-97-2	579946	923597	994833	1.73784e+06	2.45318e+06	1.99779e+06	1.19044	0.011943	0.0454359	0.403692	-1.30867	down
Wajp004095	Apigenin-7-O-Gentiobioside	Flavonoids	Flavones	C27H30O15	3	-	932234	925054	2.02764e+06	73988.8	175850	74460	1.23567	0.0822803	0.158788	11.9795	3.58249	up
Safp008433	Dichotosin	Flavonoids	Flavones	C23H28O9	3	-	1.79933e+07	1.16403e+07	1.28173e+07	3.75509e+06	4.30972e+06	2.78598e+06	1.24867	0.0276375	0.0724602	3.91224	1.96799	up
Lmjp101403	3ξ-(1ξ-Hydroxyethyl)-7-hydroxy-1-isobenzofuranone	Others	Others	C10H10O4	3	-	177714	221704	260101	21934.1	21934.1	21934.1	1.28781	0.0141577	0.0500108	10.0227	3.32521	up
Zjtp092402	3,4'-dihydroxy-5-methoxybibenzyl	Others	Stilbene	C15H16O3	3	67884-29-1	44075.8	76409.8	122565	432077	439533	289542	1.20137	0.0126056	0.0468656	0.209319	-2.25623	down
mws0852	Methotrexate	Nucleotides and derivatives	Nucleotides and derivatives	C20H22N8O5	3	59-05-2	24036.2	23468.1	41484.5	60048.2	65025	60757.4	1.16344	0.0256637	0.0696252	0.478871	-1.06229	down
Lcrp000362	4-[3-ethyl-5-[(E)-3-hydroxyprop-1-enyl]-7-methoxy-2,3-dihydro-1-benzofuran-2-yl]-2-methoxyphenol	Lignans and Coumarins	Lignans	C21H24O5	3	-	366277	443748	418237	981610	931508	964637	1.28159	0.000110327	0.00405919	0.426812	-1.22833	down
Lmhp009368	LysoPC 22:6	Lipids	LPC	C30H50NO7P	3	-	24336.3	28467.3	33479.1	116407	99033.2	70424.2	1.24103	0.0341239	0.0836272	0.301831	-1.72819	down
MWSprf168	Equol	Flavonoids	Other Flavonoids	C15H14O3	3	531-95-3	752003	701429	787174	1.77355e+06	1.77388e+06	2.00149e+06	1.28518	0.00230657	0.0173148	0.403792	-1.30832	down
MEDP1341	1-(9Z,12Z-octadecadienoyl)-sn-glycero-3-phosphocholine	Lipids	LPC	C26H50NO7P	3	22252-07-9	674383	666666	548603	2.65403e+06	2.25529e+06	2.48115e+06	1.28455	0.00167184	0.0146449	0.255687	-1.96755	down
Lmsp011053	7-Hydroxy-2',5,8-Trimethoxyflavanone*	Flavonoids	Flavanones	C18H18O6	3	-	184440	184440	184440	933432	1.13453e+06	922201	1.28961	0.00713443	0.0334633	0.185047	-2.43403	down
pmp000008	5-Desmethylsinensetin	Flavonoids	Flavones	C19H18O7	2	21763-80-4	89851.5	98599.1	100096	294660	275788	271221	1.2897	0.000290223	0.00654802	0.342826	-1.54445	down
Lacp005171	3-(3'-Hydroxybutyl)-2,4,4-trimethylcyclohexa-2,5-dienone glucoside	Terpenoids	Sesquiterpenoids	C19H30O7	1	-	5340.71	5340.71	5340.71	26703.5	159614	290338	1.16731	0.18114	0.28042	0.0336136	-4.89481	down
Sacp008256	isoshyobunone*	Terpenoids	Sesquiterpenoids	C15H24O	1	21698-46-4	114108	114108	114108	1.06686e+06	1.13138e+06	1.18504e+06	1.29327	0.00113397	0.0122333	0.101181	-3.30499	down
zjbp111632	14-hydroxy-α-humulene*	Terpenoids	Sesquiterpenoids	C15H24O	1	-	114108	114108	114108	1.06686e+06	1.13138e+06	1.18504e+06	1.29327	0.00113397	0.0122333	0.101181	-3.30499	down
Lcyp000689	Cyanidin-3-O-gentiobioside*	Flavonoids	Anthocyanidins	C27H31O16+	2	47845-44-3	659393	283956	197369	719451	909174	1.22279e+06	1.03091	0.0491632	0.109954	0.400054	-1.32173	down
Lsj214143	Soranjidiol; 1,6-Dihydroxy-2-methyl-9,10-anthraquinone	Quinones	Anthraquinone	C15H10O4	2	518-73-0	652508	586367	512702	2.00147e+06	2.44774e+06	2.11915e+06	1.28143	0.00396004	0.0233725	0.266669	-1.90688	down
HX1305	12,13-Dehydrogeranylgeraniol	Terpenoids	Monoterpenoids	C20H32O	2	352274-18-1	150857	150857	150857	1.58455e+06	2.70222e+06	2.29543e+06	1.28463	0.0246118	0.0676943	0.068757	-3.86235	down
Zblp001862	Delphinidin-3-O-galactoside	Flavonoids	Anthocyanidins	C21H21O12+	2	28500-00-7	59378.7	59378.7	59378.7	296893	347712	348397	1.29126	0.00391935	0.0232384	0.179391	-2.47882	down
Lcsp003681	Val-Val-Leu	Amino acids and derivatives	Amino acids and derivatives	C16H31N3O4	3	-	13513.8	21561.8	33836.5	2702.76	2702.76	2702.76	1.25345	0.0754938	0.149041	8.49898	3.08729	up
Wcjp001256	9-Alpha-Ribofuranosyladenine*	Nucleotides and derivatives	Nucleotides and derivatives	C10H13N5O4	1	-	743463	697004	764242	104455	104455	104455	1.29321	0.000992486	0.0117155	7.03558	2.81467	up
Zbkp001454	Miserotoxin	Alkaloids	Alkaloids	C9H17NO8	3	24502-76-9	743463	697004	764242	104455	104455	104455	1.29321	0.000992486	0.0117155	7.03558	2.81467	up
Zmsp001773	9-Arabinosyladenine*	Nucleotides and derivatives	Nucleotides and derivatives	C10H13N5O4	1	-	743463	697004	764242	104455	104455	104455	1.29321	0.000992486	0.0117155	7.03558	2.81467	up
Lacp001431	N-(3-hydroxy-4-methoxyphenethyl)-4-hydroxybutanamide	Alkaloids	Alkaloids	C14H21NO4	3	-	743463	697004	764242	104455	104455	104455	1.29321	0.000992486	0.0117155	7.03558	2.81467	up
pma0948	Phenylethanolamine	Alkaloids	Alkaloids	C8H11NO	3	7568-93-6	9225.09	9225.09	9225.09	101213	105643	88774.9	1.29246	0.00318026	0.0205232	0.0936142	-3.41713	down
Wahlp07899	Norephedrin 3-O-(2''-Phenylpropanyl)Glucoside	Alkaloids	Phenolamine	C24H33NO6	3	-	47622.1	106542	75607.3	18412.6	26278.5	26868	1.1724	0.0866934	0.164393	3.21094	1.68299	up
Zbqp003387	N-(Octadenyl)nornicotine	Alkaloids	Pyridine alkaloids	C17H24N2O	3	-	1.43306e+06	1.27547e+06	1.3235e+06	255094	255094	255094	1.2926	0.0018289	0.015413	5.26868	2.39744	up
Wafp003158	N-Feruloylhomoagmatine	Alkaloids	Phenolamine	C16H24N4O3	3	-	72127.2	35833	37738.7	167670	151883	178941	1.21782	0.00205659	0.0163591	0.292278	-1.77459	down
zjbp111502	Ciwujiatone	Lignans and Coumarins	Lignans	C22H26O9	3	-	84364.5	28361.2	96242.2	5672.23	5672.23	5672.23	1.23014	0.0924121	0.172694	12.2802	3.61826	up
Walp003622	6-beta-d-glucopyranosyloxyindole-3-carboxylic acid	Alkaloids	Plumerane	C15H17NO8	3	-	60603.1	60603.1	60603.1	936629	1.1211e+06	1.24456e+06	1.2916	0.00731801	0.033949	0.0550555	-4.18297	down
HX1373	threo-guaiacylglycerol-β-coniferyl ether	Lignans and Coumarins	Lignans	C20H24O7	3	-	71686.7	94779.9	135197	14337.3	14337.3	14337.3	1.27063	0.0433491	0.10017	7.01347	2.81013	up
Lazp010816	Fleuryinol B	Terpenoids	Ditepenoids	C20H30O2	3	-	350511	534443	323798	64759.5	64759.5	64759.5	1.27495	0.0362671	0.0875914	6.22174	2.63732	up
Wbtp007858	7-O-Methyltectorigenin; 4',5-Dihydroxy-6,7-Dimethoxyisoflavone	Flavonoids	Isoflavones	C17H14O6	3	1096-58-8	6.51111e+06	6.82095e+06	6.79829e+06	1.47258e+07	1.36588e+07	1.52786e+07	1.28809	0.00263277	0.0186933	0.461038	-1.11704	down
MWSmce415	Cirsimaritin*	Flavonoids	Flavones	C17H14O6	1	6601-62-3	6.51111e+06	6.82095e+06	6.79829e+06	1.47258e+07	1.36588e+07	1.52786e+07	1.28809	0.00263277	0.0186933	0.461038	-1.11704	down
MWSHY0009	Diosmetin (5,7,3'-Trihydroxy-4'-methoxyflavone)*	Flavonoids	Flavones	C16H12O6	3	520-34-3	163799	163799	163799	925034	1.20957e+06	1.08142e+06	1.28927	0.00810644	0.0358837	0.152797	-2.71031	down
Zmcp102202	Senkyunolide C*	Others	Lactones	C12H12O3	2	-	3.12848e+06	3.26188e+06	3.02116e+06	408905	408905	408905	1.29342	0.000650655	0.00946113	7.67213	2.93963	up
Lskp211409	20,26-Dihydroxyecdysone*	Steroids	Steroid	C27H44O8	2	19458-46-9	24362.8	39473.1	41510	219915	93418.2	212620	1.19344	0.0735043	0.146337	0.200295	-2.3198	down
Labp003707	Glucosyl corchoionoside C	Terpenoids	Monoterpenoids	C25H40O13	3	-	3807.26	3807.26	3807.26	67490.5	65488.7	27927.5	1.26215	0.0606756	0.127518	0.0709838	-3.81637	down
Lcfp067444	6,9-dihydroxymegastigmasta-5,7-dien-3-one9-O-beta-D-gentiobioside	Others	Others	C25H40O13	3	-	3807.26	3807.26	3807.26	67490.5	65488.7	27927.5	1.26215	0.0606756	0.127518	0.0709838	-3.81637	down
pma2172	Cinnamoyltyramine	Alkaloids	Phenolamine	C17H17NO2	3	20384-14-9	6153.82	6153.82	6153.82	52620.7	62557.7	30769.1	1.26583	0.0455087	0.104128	0.126494	-2.98286	down
HJAP057	Dihydroxy-dimethoxyflavone*	Flavonoids	Flavonols	C17H14O6	1	-	6.55087e+06	6.87104e+06	6.61167e+06	1.39875e+07	1.47156e+07	1.55708e+07	1.2889	0.00223896	0.017097	0.452491	-1.14404	down
Lhmp122112	5-Pregnene-3,17,20-triol-20-O-glucoside*	Steroids	Cardiac glycoside	C27H44O8	2	-	43462.9	17535.3	32972.5	153114	146605	259299	1.21805	0.0462526	0.105333	0.168099	-2.57261	down
Lmtp005493	4,4'-Dihydroxy-3,5-dimethoxybibenzyl	Others	Stilbene	C16H18O4	3	39499-96-2	1.31536e+06	715724	998172	70805.8	70805.8	70805.8	1.28221	0.0323816	0.0801196	14.2609	3.83399	up
MWS201465	Glu-Phe	Amino acids and derivatives	Amino acids and derivatives	C14H18N2O5	1	20556-22-3	302548	426919	2081.89	416.377	416.377	416.377	1.06862	0.193308	0.294273	585.646	9.19389	up
Lhmp101304	Ranunculinin glucoside*	Others	Others	C11H16O8	3	-	47471.9	47471.9	47471.9	456345	493994	418233	1.29255	0.00285108	0.0195574	0.104061	-3.26449	down
HX1346	ranunculin*	Others	Others	C11H16O8	3	-	47471.9	47471.9	47471.9	456345	493994	418233	1.29255	0.00285108	0.0195574	0.104061	-3.26449	down
Layp002880	5,7-Dihydroxychromone glucoside	Others	Chromone	C15H16O9	2	-	40048.5	40048.5	40048.5	244089	307816	400322	1.28133	0.0257132	0.0696252	0.126173	-2.98652	down
Wazcp04835	Phycoerythrobilin	Others	Others	C33H38N4O6	2	18097-67-1	476997	852375	681886	201169	265156	314814	1.1769	0.0532125	0.114989	2.57478	1.36445	up
MWSslk187	Typhaneoside*	Flavonoids	Flavonols	C34H42O20	3	104472-68-6	901.775	901.775	901.775	25019	11712.2	4508.87	1.20251	0.165936	0.262331	0.0655993	-3.93018	down
Sadp007464	5-(hydroxymethyl)-7-methoxy-1,8-dimethyl-9,10-dihydrophenanthren-2-ol	Terpenoids	Ditepenoids	C18H20O3	3	-	1.29094e+06	1.53066e+06	1.20626e+06	241252	241252	241252	1.28934	0.00769023	0.0351252	5.56521	2.47644	up
Rfp165621	Solavetivone	Alkaloids	Alkaloids	C15H22O1	3	54878-25-0	1.99138e+06	2.12545e+06	2.03101e+06	1.03973e+06	859838	1.01002e+06	1.27635	0.000181435	0.00534621	2.11296	1.07927	up
Hmcp001105	5-(2-Hydroxypropyl)hygrine	Alkaloids	Pyrrole alkaloids	C11H21NO2	3	-	26908.5	26908.5	26908.5	167308	310786	134543	1.25333	0.0818886	0.158139	0.131767	-2.92393	down
Zmjp000966	Vidarabine	Nucleotides and derivatives	Nucleotides and derivatives	C10H13N5O4	3	5536-17-4	808268	748514	752877	97589.5	97589.5	97589.5	1.29334	0.00081735	0.0106673	7.88903	2.97985	up
pma6360	O-MethylChrysoeriol-8-C-glucoside	Flavonoids	Flavones	C23H24O11	3	-	399096	530706	470357	817275	1.10815e+06	1.27325e+06	1.20951	0.0376128	0.0900753	0.437731	-1.19188	down
Yajp004597	Grasshopper Ketone	Terpenoids	Monoterpenoids	C13H20O3	3	-	105761	105761	105761	590814	729992	528804	1.28625	0.0132931	0.0482813	0.17154	-2.54338	down
Sahp003947	Staphylionoside A	Terpenoids	Sesquiterpenoids	C19H30O8	3	-	235042	206298	322199	493700	570874	684472	1.20603	0.011479	0.0440053	0.436546	-1.19579	down
pme2828	4-Nitrophenol	Others	Others	C6H5NO3	3	100-02-7	1.17648e+06	1.12265e+06	934346	186869	186869	186869	1.28954	0.00671912	0.0322086	5.7678	2.52802	up
Cmyp003288	Edgeworin	Lignans and Coumarins	Coumarins	C18H10O6	3	120028-43-5	9751.11	9751.11	9751.11	92109.7	107763	116307	1.29157	0.00544288	0.0284496	0.0925211	-3.43407	down
zjbp111627	baimuxifuranic acid	Terpenoids	Sesquiterpenoids	C15H24O3	3	-	22741	22741	22741	810153	611286	579532	1.29128	0.0123161	0.046239	0.034095	-4.8743	down
Zjyp102916	(1R,4aR,7R,8aR)-1,4a,8a-trimethyl-7-(prop-1-en-2-yl)-deca-hydronaphthalen-1-ol	Terpenoids	Sesquiterpenoids	C15H24O	1	-	70924.3	70924.3	70924.3	579983	734907	658497	1.29127	0.0057575	0.0297646	0.107821	-3.21329	down
Zblp004882	4'-Hydroxy-3,5-dimethoxydihydrochalcone	Flavonoids	Chalcones	C17H18O4	3	-	218376	218376	218376	1.3071e+06	1.17568e+06	1.09188e+06	1.29128	0.00411655	0.0237519	0.18327	-2.44796	down
MWSHY0123	Wogonin	Flavonoids	Flavones	C16H12O5	2	632-85-9	42102.7	42102.7	42102.7	410312	210514	316292	1.26928	0.0426953	0.0989819	0.134784	-2.89128	down
Lmpp003611	Malvidin-3-O-(6''-O-caffeoyl)glucoside	Flavonoids	Anthocyanidins	C32H31O15+	2	-	8993.72	8993.72	8993.72	96651.5	44968.6	63209.3	1.26255	0.059415	0.125802	0.131725	-2.9244	down
Lkmp122714	Sonchuionoside A	Terpenoids	Sesquiterpenoids	C19H30O8	3	-	4075.63	4075.63	4075.63	21362.2	71882.2	38587.3	1.23555	0.114956	0.201654	0.0927462	-3.43057	down
MWSHY0062	2',4'-Dihydroxy-6'-methoxychalcone; (E)-Cardamonin	Flavonoids	Chalcones	C16H14O4	2	18956-16-6	65459.8	166448	212574	2.12421e+06	2.33843e+06	2.50841e+06	1.25412	0.000820855	0.0106673	0.063761	-3.97118	down
Zbsp004136	Quercetin-3-O-(6''-O-arabinosyl)glucoside*	Flavonoids	Flavonols	C26H28O16	3	-	42376	145412	24232.6	4846.52	4846.52	4846.52	1.18321	0.223195	0.326806	14.5823	3.86615	up
Wbtp006564	4,8,10-trihydroxy-2-methoxy-1h,2h-furo[3,2-a]xanthen-11-one*	Flavonoids	Other Flavonoids	C16H12O7	3	-	885241	709631	1.10651e+06	141926	141926	141926	1.28121	0.0221547	0.0632703	6.34456	2.66552	up
Wagp010556	2',4'-Dihydroxy-2,3',6'-Trimethoxychalcone*	Flavonoids	Chalcones	C18H18O6	3	100079-39-8	211807	211807	211807	1.16852e+06	1.05903e+06	1.12483e+06	1.29297	0.00123212	0.0126715	0.189543	-2.3994	down
Zken00392	1-(9Z-octadecenoyl)-sn-glycero-3-phosphocholine	Lipids	LPC	C26H52NO7P	3	-	309427	198447	398420	567378	551360	795383	1.10529	0.0302134	0.0764238	0.473478	-1.07863	down
pmd0130	LysoPC 14:0	Lipids	LPC	C22H46NO7P	2	20559-16-4	8282.85	8282.85	8282.85	61998	58089.1	61499.4	1.29346	0.000552289	0.00894985	0.136841	-2.86942	down
Hmyp009288	Epinootkatol	Terpenoids	Sesquiterpenoids	C15H24O	3	-	13869.4	13869.4	13869.4	237108	228908	119312	1.27502	0.041203	0.0964694	0.0710855	-3.8143	down
Lhmp112604	Vitexilactone	Terpenoids	Ditepenoids	C22H34O5	3	61263-49-8	5617.99	5617.99	5617.99	33623.9	53486.9	28090	1.26766	0.0511176	0.11254	0.146301	-2.77299	down
Qacp006433	1,3-Dihydroxy-2-methoxyxanthone-glucoside	Others	Xanthone	C20H20O10	3	-	30935.5	30935.5	30935.5	154678	210390	214003	1.28511	0.0137447	0.0496035	0.160268	-2.64144	down
Zmjp003291	Vitexin-2''-O-galactoside*	Flavonoids	Flavones	C27H30O15	3	-	320500	426431	531411	64100	64100	64100	1.27828	0.0271397	0.0716558	6.64764	2.73284	up
Lhpp101822	Veronicoside	Terpenoids	Monoterpenoids	C22H26O11	3	50981-09-4	11219.2	11219.2	11219.2	56096.8	56095.8	60923.9	1.293	0.00119615	0.0124794	0.194421	-2.36274	down
pmp001164	Iristectorin B	Flavonoids	Isoflavones	C23H24O12	3	94396-09-5	39750.2	14694.1	56224.4	116461	101946	83388.6	1.04568	0.0160186	0.0533263	0.3667	-1.44733	down
Sayp007217	caesaldekarin B	Terpenoids	Ditepenoids	C20H30O3	3	-	22332.7	22332.7	22332.7	197139	272289	150215	1.27811	0.0352869	0.0855859	0.108124	-3.20924	down
pmp001265	2-Amino-4-dihydroxy octadecyl galactoside	Alkaloids	Alkaloids	C24H49NO8	3	-	111374	107457	68595.6	185619	157408	241190	1.13063	0.0366179	0.0882129	0.491986	-1.02331	down
pmp000024	Isobyakangelicol	Lignans and Coumarins	Coumarins	C17H16O6	3	35214-81-4	651451	669713	330056	65810.8	65810.8	65810.8	1.26267	0.0481014	0.10798	8.36347	3.0641	up
Sayp005415	Neocurdione	Terpenoids	Sesquiterpenoids	C15H24O2	3	108944-67-8	8565.57	8565.57	8565.57	77868.8	70123	46915	1.27862	0.0261248	0.0703357	0.131841	-2.92313	down
pmb0108	Feruloyl syringic acid	Phenolic acids	Phenolic acids	C19H18O8	3	-	58509.2	58509.2	58509.2	294656	292546	333022	1.29207	0.00279642	0.019448	0.190744	-2.39029	down
Hmcp002187	Limocitrin-3-O-galactoside*	Flavonoids	Flavonols	C23H24O13	1	-	60011.2	60011.2	60011.2	300056	527734	832673	1.24703	0.0854186	0.162847	0.108424	-3.20525	down
Zmgp004436	Okanin-4'-(6''-O-acetyl)glucoside*	Flavonoids	Chalcones	C23H24O13	1	-	60011.2	60011.2	60011.2	300056	527734	832673	1.24703	0.0854186	0.162847	0.108424	-3.20525	down
pme2527	L-Ornithine	Amino acids and derivatives	Amino acids and derivatives	C5H12N2O2	3	348-66-3	1.09256e+06	1.02526e+06	1.08616e+06	255230	271157	190657	1.28004	1.67406e-05	0.00215573	4.46832	2.15973	up
Lhfp112915	Dihydrojuglone	Quinones	Quinones	C10H8O3	3	-	8.13886e+06	8.56864e+06	7.66582e+06	2.79522e+06	2.61595e+06	2.9219e+06	1.2891	0.000944601	0.011635	2.92489	1.54838	up
Zbsp004455	Tricin-5,7-O-diglucoside	Flavonoids	Flavones	C29H34O17	1	-	12774.2	13431.9	42398.7	2554.84	2554.84	2554.84	1.20669	0.173065	0.271031	8.95095	3.16204	up
NK10246260	2,4-Dihydroxyquinoline	Alkaloids	Quinoline alkaloids	C9H7NO2	3	86-95-3	29697.1	29697.1	29697.1	323813	224473	214187	1.28411	0.0234021	0.065392	0.116845	-3.09733	down
WaTKp17885	2-[4-(2-Methylpropenyl)phenyl]propionic Acid	Phenolic acids	Phenolic acids	C13H16O2	3	75625-99-9	117546	117546	117546	686591	639085	587731	1.2919	0.00299703	0.0199779	0.184299	-2.43988	down
Wcfp003211	1,1'-(6-hydroxy-2,3-dihydro-1H-indene-2,5-diyl)bis(ethan-1-one)	Terpenoids	Sesquiterpenoids	C13H14O3	3	-	195547	195547	195547	1.02619e+06	1.35632e+06	978122	1.28486	0.016127	0.0534449	0.174563	-2.51818	down
MWSHY0104	Luteolin 7-O-beta-D-glucoside*	Flavonoids	Flavones	C21H20O11	1	5373-11-5	5.98447e+06	1.27392e+07	8.72848e+06	1.19689e+06	1.19689e+06	1.19689e+06	1.26375	0.0557679	0.119328	7.64539	2.93459	up
Safp009165	Homobutein 4-glucoside	Flavonoids	Chalcones	C22H24O10	3	-	5.98447e+06	1.27392e+07	8.72848e+06	1.19689e+06	1.19689e+06	1.19689e+06	1.26375	0.0557679	0.119328	7.64539	2.93459	up
Xmyp005654	Kaempferol-4'-O-glucoside*	Flavonoids	Flavonols	C21H20O11	1	52222-74-9	5.98447e+06	1.27392e+07	8.72848e+06	1.19689e+06	1.19689e+06	1.19689e+06	1.26375	0.0557679	0.119328	7.64539	2.93459	up
Lafp002342	2,3-Dihydroxy-1-(4-hydroxy-3,5-dimethoxyphenyl)propan-1-one	Others	Ketone compounds	C11H14O6	3	33900-74-2	20939.4	45839.4	40522	4187.88	4187.88	4187.88	1.26019	0.0529548	0.114715	8.54059	3.09434	up
Sayp008439	caesalpinin ML	Terpenoids	Ditepenoids	C20H32O2	3	-	384577	81524.6	234400	16304.9	16304.9	16304.9	1.21351	0.131086	0.22211	14.3209	3.84005	up
MWSmce072	Vincamine	Alkaloids	Plumerane	C21H26N2O3	3	1617-90-9	1.51512e+06	863738	393542	78708.3	78708.3	78708.3	1.2259	0.121549	0.209946	11.7412	3.55351	up
mws0333	5-Methoxytryptamine	Alkaloids	Plumerane	C11H14N2O	3	608-07-1	10862.4	10862.4	10862.4	82489.8	70006.2	64723.3	1.29006	0.00724532	0.0338155	0.150019	-2.73678	down
Hmhp002834	Cyanidin 3-xyloside	Flavonoids	Anthocyanidins	C20H19O10+	3	29761-24-8	29872	70763.1	71016.5	5974.4	5974.4	5974.4	1.25113	0.0643943	0.133355	9.57706	3.25958	up
Zjyp110101	Nootkatone	Terpenoids	Sesquiterpenoids	C15H22O	1	4674-50-4	815518	777401	755097	2.99118e+06	2.70545e+06	3.00014e+06	1.29126	0.00156633	0.0143134	0.269987	-1.88904	down
pme1398	Delphinidin-3-O-glucoside (Mirtillin)	Flavonoids	Anthocyanidins	C21H21O12+	3	50986-17-9	56344.9	56344.9	56344.9	314780	728034	933702	1.24628	0.0803893	0.155947	0.0855216	-3.54757	down
pme1184	Deoxyguanosine	Nucleotides and derivatives	Nucleotides and derivatives	C10H13N5O4	3	961-07-9	838511	763082	606588	1.74232e+06	1.76853e+06	1.74907e+06	1.2637	0.00407228	0.023646	0.419813	-1.25218	down
Lmhp008233	LysoPE 18:4	Lipids	LPE	C23H40NO7P	3	-	14430.3	12632.2	16448	23293.5	67008.8	43694.9	1.10574	0.138499	0.230398	0.324712	-1.62277	down
MWS0686	5,6-Dihydroxyindole-2-carboxylate	Alkaloids	Plumerane	C9H7NO4	3	4790-08-3	5227.84	5227.84	5227.84	65944.7	50915.4	26139.2	1.25282	0.0673155	0.137546	0.109676	-3.18869	down
Zblp006200	4-Hydroxy-4'-methoxydihydrochalcone	Flavonoids	Chalcones	C16H16O3	3	206194-36-7	195093	114106	246513	22821.3	22821.3	22821.3	1.26266	0.0519549	0.113237	8.11688	3.02092	up
Zmgp003417	1-(4-hydroxyphenyl)-7-phenylhepta-3,5-dione	Others	Ketone compounds	C19H20O3	3	-	2.19612e+06	2.27473e+06	2.53967e+06	5.30925e+06	5.51903e+06	5.18008e+06	1.28524	3.14866e-05	0.00308717	0.437929	-1.19123	down
Ydyp005399	Cernuoside*	Flavonoids	Aurones	C21H20O11	1	480-69-3	79457.6	109320	32944.8	6588.95	6588.95	6588.95	1.23518	0.0938727	0.174502	11.2169	3.4876	up
Hmcp002316	Isorhamnetin-3-O-arabinoside*	Flavonoids	Flavonols	C21H20O11	1	-	79457.6	109320	32944.8	6588.95	6588.95	6588.95	1.23518	0.0938727	0.174502	11.2169	3.4876	up
mws0596	3-Hydroxyanthranilate	Alkaloids	Alkaloids	C7H7NO3	3	548-93-6	196427	225388	42636.5	8527.31	8527.31	8527.31	1.2015	0.123128	0.211793	18.1555	4.18233	up
pma0214	6-C-Methylquercetin-3-O-glucoside*	Flavonoids	Flavonols	C22H22O12	1	-	6.41434e+06	6.4456e+06	5.97853e+06	1.19571e+06	1.19571e+06	1.19571e+06	1.29317	0.000878167	0.0110571	5.2517	2.39279	up
Zbsp004450	3'-O-Methyltricetin-7-O-glucoside*	Flavonoids	Flavones	C22H22O12	1	-	6.41434e+06	6.4456e+06	5.97853e+06	1.19571e+06	1.19571e+06	1.19571e+06	1.29317	0.000878167	0.0110571	5.2517	2.39279	up
pmp000604	Rubrofusarin-6-O-glucoside*	Others	Ketone compounds	C21H22O10	3	132922-80-6	350857	484200	563589	242390	162667	208585	1.18234	0.0388952	0.0924412	2.27925	1.18856	up
pmp001257	Tridecanoylglycine	Amino acids and derivatives	Amino acids and derivatives	C15H29NO3	3	-	866806	1.02682e+06	973809	104594	104594	104594	1.29243	0.00304258	0.0201865	9.13832	3.19193	up
Zbqp003444	4-amino-5-oxo-5-(pentylamino)pentanoic acid	Amino acids and derivatives	Amino acids and derivatives	C10H20N2O3	2	-	288179	327340	270376	1.13165e+07	1.03367e+07	1.21645e+07	1.29268	0.00228652	0.0172958	0.0261963	-5.2545	down
pma0702	N1,N8-Bis(sinapoyl)spermidine	Alkaloids	Phenolamine	C29H39N3O8	3	-	1698.02	1698.02	1698.02	8490.11	82574.9	66780.2	1.16856	0.15228	0.245399	0.0322725	-4.95355	down
Qmmp111813	Ent-Sessilifol M	Terpenoids	Ditepenoids	C20H30O2	3	-	382232	185281	256704	37056.1	37056.1	37056.1	1.26505	0.053955	0.116239	7.41413	2.89028	up
MWSmce572	Cinnamamide	Alkaloids	Alkaloids	C9H9NO	3	22031-64-7	90520.6	75944.1	75903.9	224907	189998	351712	1.22334	0.0693856	0.140809	0.316153	-1.6613	down
Wafp003601	N-Feruloylmethylagmatine	Alkaloids	Phenolamine	C16H24N4O3	3	-	47003.6	73021.9	96877.4	9400.72	9400.72	9400.72	1.26602	0.0486317	0.108998	7.691	2.94317	up
Zbqp001937	2,6-diamino-7-methyl-5-oxooctanoic acid	Amino acids and derivatives	Amino acids and derivatives	C9H18N2O3	3	-	1.05702e+06	1.12654e+06	1.19199e+06	392158	404756	499462	1.27469	0.000200267	0.00534621	2.60383	1.38064	up
pmf0526	Isoimperatorin	Lignans and Coumarins	Coumarins	C16H14O4	3	482-45-1	3.01415e+06	1.2782e+06	1.4279e+06	68392.9	68392.9	68392.9	1.27623	0.0804142	0.155947	27.8793	4.80112	up
Lmhp010757	LysoPE 20:2	Lipids	LPE	C25H48NO7P	3	-	11541.9	32661.8	64584.4	2308.37	2308.37	2308.37	1.20311	0.15855	0.253636	15.7092	3.97354	up
Ljmp121502	Mansonone Q	Terpenoids	Sesquiterpenoids	C15H20O4	3	-	203628	229968	141123	14807.5	14807.5	14807.5	1.28517	0.0215003	0.0619799	12.9376	3.6935	up
MWSmce577	Ethyl p-methoxycinnamate	Phenolic acids	Phenolic acids	C12H14O3	3	1929-30-2	483582	444489	615742	88897.9	88897.9	88897.9	1.28571	0.014492	0.0506671	5.78871	2.53324	up
zjbp111643	neopetasane	Terpenoids	Sesquiterpenoids	C15H22O	3	151282-84-7	300752	345783	330033	935822	1.08835e+06	1.06295e+06	1.28615	0.00260832	0.018613	0.316335	-1.66047	down
Zjhp090625	7-O-β-D-glucopyranoside-5-hydroxy-3-(4'-hydroxybenzylidene)-chroman-4-one*	Flavonoids	Other Flavonoids	C22H22O10	3	-	470495	535592	589965	94099.1	94099.1	94099.1	1.29005	0.00616147	0.030699	5.6538	2.49922	up
Lamp007163	4'-Demethyleucomin glucoside*	Flavonoids	Other Flavonoids	C22H22O10	3	-	470495	535592	589965	94099.1	94099.1	94099.1	1.29005	0.00616147	0.030699	5.6538	2.49922	up
Smlp005221	Podolactone D	Terpenoids	Ditepenoids	C20H24O7S	3	-	39396.1	19558.1	39366.9	3911.62	3911.62	3911.62	1.26216	0.0486242	0.108998	8.37855	3.0667	up
Lhfp112910	6-hydroxy-isosclerone	Quinones	Quinones	C10H10O4	3	-	12951.1	12951.1	12951.1	175703	149196	64755.3	1.24631	0.0729912	0.145931	0.0997119	-3.32609	down
Hasp013107	Saurufuran B	Terpenoids	Ditepenoids	C20H28O3	3	425368-87-2	34212.8	34212.8	34212.8	747888	171064	740091	1.21006	0.113008	0.1991	0.0618661	-4.01471	down
MWSslk232	Complanatuside	Flavonoids	Flavonols	C28H32O16	2	116183-66-5	3855.2	3855.2	3855.2	19276	55534.9	21908.1	1.22752	0.135554	0.226803	0.119579	-3.06396	down
Wbsp003565	Acetylfawcettine	Alkaloids	Alkaloids	C20H31NO4	3	-	468877	1.02549e+06	505385	93775.5	93775.5	93775.5	1.25126	0.0859752	0.163388	7.10829	2.8295	up
pmb1562	1-Stearidonoyl-Glycerol	Lipids	Glycerol ester	C21H34O4	3	-	132090	54776.6	28872.6	5774.51	5774.51	5774.51	1.20985	0.16652	0.263077	12.4535	3.63848	up
pmp000110	7-Hydroxy-3,5,6,8-tetramethoxyflavone*	Flavonoids	Flavonols	C19H18O7	3	-	9601.14	9601.14	9601.14	91108.7	48005.7	101824	1.26196	0.0500712	0.111343	0.119547	-3.06435	down
Lhnp110107	Cycloolivil	Lignans and Coumarins	Lignans	C20H24O7	3	3064-05-9	357158	394793	383293	57663	68681.6	70489.8	1.28969	0.000389539	0.00721284	5.76751	2.52795	up
Zbhp004510	Hesperetin-3'-O-glucoside	Flavonoids	Flavanones	C22H24O11	2	-	6768.78	6768.78	6768.78	100211	33843.9	800540	1.10285	0.339931	0.451071	0.0217274	-5.52434	down
pmf0289	Riboprine	Nucleotides and derivatives	Nucleotides and derivatives	C15H21N5O4	3	7724-76-7	34457.4	5153.38	28248.6	1030.68	1030.68	1030.68	1.18868	0.136472	0.227828	21.9465	4.45592	up
Wadp008128	3-Oxo-9beta-pimara-8,15-dien-19,6beta-olide	Terpenoids	Ditepenoids	C20H26O3	3	-	43893.3	54253.2	41070.6	8214.12	8214.12	8214.12	1.28767	0.0108318	0.0423979	5.6495	2.49812	up
mws2627	Tamarixetin	Flavonoids	Flavonols	C16H12O7	3	603-61-2	37051.5	37051.5	37051.5	207373	323770	234533	1.28138	0.024998	0.0682925	0.145172	-2.78417	down
MWSmce472	7-Amino-4-(trifluoromethyl)coumarin	Lignans and Coumarins	Coumarins	C10H6F3NO2	3	53518-15-3	68452.2	23874.3	35811.8	4774.86	4774.86	4774.86	1.24147	0.104374	0.187147	8.94534	3.16114	up
Walbp07873	12-Oxo phytodienoic acid	Lipids	Free fatty acids	C18H28O3	1	67204-66-4	237216	299911	213039	1.22877e+06	1.37134e+06	1.49697e+06	1.28188	0.00229552	0.0172958	0.183097	-2.44932	down
Xmgp006913	2,4,2',4'-tetrahydroxy-3'-prenylchalcone	Flavonoids	Chalcones	C20H20O5	3	-	883354	950655	1.01973e+06	2.56221e+06	3.49151e+06	2.90638e+06	1.27453	0.0157339	0.0530015	0.318494	-1.65066	down
Zbjp002538	1,7-bis(4-hydroxypheny)hept-1-ene-3-ol	Phenolic acids	Phenolic acids	C19H22O3	2	-	159543	159543	159543	1.33944e+06	1.37352e+06	1.51991e+06	1.29292	0.00195105	0.0158831	0.113075	-3.14465	down
Smlp003674	Nagilactone B	Terpenoids	Terpene	C19H24O7	3	19891-51-1	1.04988e+06	1.34253e+06	1.35369e+06	209977	209977	209977	1.28811	0.00904442	0.0383829	5.94685	2.57213	up
MWSslk129	Verbenone	Terpenoids	Monoterpenoids	C10H14O	3	1196-01-6	2.07006e+06	2.0793e+06	1.95574e+06	684456	754571	738649	1.29067	7.81706e-05	0.00346027	2.80349	1.48723	up
Laxp007582	7,2'-dihydroxy-4'-methoxy-isoflavanol	Flavonoids	Isoflavones	C16H16O5	3	-	696275	927465	693743	1.86921e+06	1.57184e+06	1.98525e+06	1.24638	0.00383285	0.0229092	0.427084	-1.22741	down
MWS04567g	S-Hexyl-glutathione	Amino acids and derivatives	Amino acids and derivatives	C16H29N3O6S	3	24425-56-7	2918.08	2918.08	2918.08	14590.4	23832.9	22568.4	1.27707	0.0265148	0.0706854	0.143532	-2.80056	down
Wadp007964	7-Oxo-pimara-8,11,15-trien-2-ol	Terpenoids	Ditepenoids	C20H28O2	3	-	2.04246e+06	2.04246e+06	2.04246e+06	2.72008e+07	2.57692e+07	2.67061e+07	1.29363	0.00029308	0.00654802	0.0769035	-3.70081	down
Cmcp004793	Lochnericine	Alkaloids	Plumerane	C21H24N2O3	3	72058-36-7	85834	85834	85834	761582	579810	819430	1.2874	0.012701	0.0469739	0.119169	-3.06892	down
Zbsp004183	Tricin-5-O-(3'-malonyl)glucoside-7-O-glucoside	Flavonoids	Flavones	C32H36O20	3	-	2052.49	2052.49	2052.49	18136.1	19938.9	32371.8	1.27955	0.0409493	0.0961936	0.0874061	-3.51612	down
Qmyp122112	5α,11-Dihydroxy-3-ene-eudesman-2-one	Terpenoids	Sesquiterpenoids	C15H24O3	3	-	792882	507944	454076	49651.9	49651.9	49651.9	1.28121	0.0364612	0.087985	11.7814	3.55843	up
Hmgp002036	Nepetin-7-O-glucoside(Nepitrin)*	Flavonoids	Flavones	C22H22O12	1	569-90-4	6.07729e+06	5.21574e+06	4.13715e+06	827431	827431	827431	1.28398	0.0164925	0.0539371	6.2161	2.63601	up
Lmjp002906	Rhamnetin-3-O-Glucoside*	Flavonoids	Flavonols	C22H22O12	1	27875-34-9	6.07729e+06	5.21574e+06	4.13715e+06	827431	827431	827431	1.28398	0.0164925	0.0539371	6.2161	2.63601	up
Lmjp003295	6-Methoxykaempferol-3-O-glucoside*	Flavonoids	Flavonols	C22H22O12	1	63422-27-5	6.07729e+06	5.21574e+06	4.13715e+06	827431	827431	827431	1.28398	0.0164925	0.0539371	6.2161	2.63601	up
Ladp004020	tenuiflorin C glucoside*	Flavonoids	Other Flavonoids	C22H22O12	1	-	6.07729e+06	5.21574e+06	4.13715e+06	827431	827431	827431	1.28398	0.0164925	0.0539371	6.2161	2.63601	up
Smzp003409	11-O-Syringoylbergenin	Lignans and Coumarins	Coumarins	C23H24O13	3	-	4399.09	4399.09	4399.09	93262	78620.2	127481	1.28839	0.0222685	0.0634036	0.0440845	-4.50358	down
Wbtp004815	5-hydroxy-6,8-dimethoxy-2,3-dimethylbenzo[g]chromen-4-one	Others	Xanthone	C17H16O5	3	-	712403	712403	712403	4.62888e+06	3.56202e+06	5.91258e+06	1.27813	0.0278161	0.0726966	0.151538	-2.72225	down
Wbtp004798	8,11-dimethoxy-2h-[1,3]dioxolo[4,5-b]xanthen-10-one	Flavonoids	Other Flavonoids	C16H12O6	3	-	1.53975e+06	1.00549e+06	1.17614e+06	3.02841e+06	3.19913e+06	2.09673e+06	1.17882	0.0302954	0.0765627	0.447052	-1.16149	down
Waqkp06484	1-Linolenoylglycerol	Lipids	Glycerol ester	C21H36O4	1	-	116249	136037	105784	571884	526197	555051	1.2872	3.64862e-05	0.00310745	0.216601	-2.20689	down
HX1312	Precocene II	Others	Others	C13H16O3	3	644-06-4	398955	227554	158721	141615	87111.3	84619.4	1.04856	0.15143	0.24468	2.50596	1.32536	up
pme0253	N-Acetyl-L-leucine	Amino acids and derivatives	Amino acids and derivatives	C8H15NO3	3	1188-21-2	79966	38906.8	7306.8	337444	393243	387666	1.13286	0.000321982	0.00665822	0.112826	-3.14782	down
Lhkp101525	Apiosylskimmin (Adicardin)	Lignans and Coumarins	Coumarins	C20H24O12	3	103529-94-8	26978.2	21906.1	17886.5	3577.3	3577.3	3577.3	1.28275	0.0192585	0.0577958	6.22172	2.63731	up
mws1401	N5-Ethyl-L-glutamine	Amino acids and derivatives	Amino acids and derivatives	C7H14N2O3	3	3081-61-6	86844.1	86844.1	86844.1	1.13328e+06	1.23243e+06	1.33393e+06	1.29291	0.00254338	0.0183343	0.0704208	-3.82785	down
Lmwp102904	N,N-Dimethyl-5-methoxytryptamine	Alkaloids	Plumerane	C13H18N2O	3	1019-45-0	65882.3	65882.3	65882.3	523390	510880	515853	1.2937	6.50539e-05	0.00346027	0.127504	-2.97138	down
Laxp006028	Sulphuretin*	Flavonoids	Aurones	C15H10O5	3	120-05-8	4.7514e+06	4.50362e+06	4.83294e+06	600799	600799	600799	1.29345	0.000584174	0.00894985	7.81623	2.96647	up
MWStz699	3',4',7-Trihydroxyisoflavone*	Flavonoids	Isoflavones	C15H10O5	3	485-63-2	4.7514e+06	4.50362e+06	4.83294e+06	600799	600799	600799	1.29345	0.000584174	0.00894985	7.81623	2.96647	up
Zbkp010423	Zerumbone	Terpenoids	Ditepenoids	C15H22O	3	471-05-6	518938	427514	615119	67140	67140	67140	1.28688	0.0139731	0.0498164	7.7528	2.95472	up
pmd0146	LysoPC 20:2(2n isomer)	Lipids	LPC	C28H54NO7P	3	-	220662	215968	261734	1.07822e+06	795614	842861	1.27659	0.0145044	0.0506671	0.257064	-1.9598	down
Yalp011328	Labda-8(20),12,14-trien-3α-ol	Terpenoids	Ditepenoids	C20H32O	3	-	220285	220285	220285	1.49205e+06	1.10716e+06	1.10143e+06	1.28495	0.0158875	0.0532656	0.178579	-2.48537	down
Lcfp224172	Dipropyleneglycoldibenzoate*	Others	Others	C20H22O5	1	20109-39-1	68410.9	42819.2	75930.9	4434.34	4434.34	4434.34	1.2821	0.0286273	0.0734729	14.0691	3.81445	up
Walbp08740	3,3'-Oxydipropyl dibenzoate	Phenolic acids	Phenolic acids	C20H22O5	3	94-51-9	68410.9	42819.2	75930.9	4434.34	4434.34	4434.34	1.2821	0.0286273	0.0734729	14.0691	3.81445	up
Lhfp112926	Myricatomentogenin*	Others	Others	C20H22O5	1	-	68410.9	42819.2	75930.9	4434.34	4434.34	4434.34	1.2821	0.0286273	0.0734729	14.0691	3.81445	up
Wbwp010459	5-[(2r,3s,4s,5s)-5-(2h-1,3-benzodioxol-5-yl)-3,4-dimethyloxolan-2-yl]-2-methoxyphenol	Lignans and Coumarins	Lignans	C20H22O5	3	-	68410.9	42819.2	75930.9	4434.34	4434.34	4434.34	1.2821	0.0286273	0.0734729	14.0691	3.81445	up
MWSslk055	Nevadensin*	Flavonoids	Flavones	C18H16O7	2	10176-66-6	1332.33	1332.33	1332.33	15794.3	27808.8	6661.66	1.22099	0.128056	0.217888	0.079519	-3.65256	down
Zmmp003258	Glu-Pro-Leu	Amino acids and derivatives	Amino acids and derivatives	C16H27N3O6	3	-	12909.3	13763.5	14257.3	23542	29444.7	31279.7	1.2536	0.0225763	0.0638949	0.485722	-1.0418	down
Zbsp008181	Persicogenin (5,3'-dihydroxy-7,4'-dimethoxyflavanone)	Flavonoids	Flavanones	C17H16O6	3	28590-40-1	1.25479e+06	1.17887e+06	752769	108784	108784	108784	1.28071	0.0258196	0.0697967	9.76383	3.28745	up
Lhcp090202	3-(Acetyloxy)-13,15-dihydroxyoleanan-12-one (Rubiprasin A)	Terpenoids	Triterpene	C32H52O5	3	125263-65-2	43933.7	59456.5	53950	8786.74	8786.74	8786.74	1.28733	0.0106575	0.0419927	5.96885	2.57745	up
MWStz554	Methyl 4-caffeoylquinate	Phenolic acids	Phenolic acids	C17H20O9	2	123372-74-7	93305.2	61002.5	90700.5	12200.5	12200.5	12200.5	1.28016	0.0215278	0.0619799	6.69394	2.74285	up
Zbqp002313	4-amino-5-(butylamino)-5-oxopentanoic acid	Amino acids and derivatives	Amino acids and derivatives	C9H18N2O3	3	-	27544.3	32451	28991.6	1.02409e+06	1.09099e+06	1.10885e+06	1.29313	0.0005876	0.00894985	0.027602	-5.17909	down
Lhmp121005	Symplocosin	Lignans and Coumarins	Lignans	C26H32O11	3	11042-30-1	20698.5	21820.1	11449.2	2289.84	2289.84	2289.84	1.26747	0.0411263	0.0964694	7.85612	2.97382	up
WaYp004901	Reseoside	Terpenoids	Monoterpenoids	C19H30O7	1	-	56801.2	56801.2	56801.2	426388	284006	317788	1.28196	0.0218301	0.0625324	0.165733	-2.59307	down
pmp000344	3',4',7-Trihydroxyflavone	Flavonoids	Flavones	C15H10O5	1	2150-11-0	213950	213950	213950	2.59934e+06	2.3434e+06	2.66651e+06	1.29307	0.00179156	0.015179	0.0843514	-3.56744	down
Wbtp005363	5,6-dihydroxy-1-methoxyxanthen-9-one*	Flavonoids	Other Flavonoids	C14H10O5	3	-	165440	63976.9	89429.5	12795.4	12795.4	12795.4	1.24789	0.091872	0.172138	8.30628	3.0542	up
Lamp005564	Borneol-2-O-β-D-apiofuranosyl(1→6)-β-D-glucopyranoside	Terpenoids	Terpene	C21H36O10	2	-	195902	395097	265916	39180.4	39180.4	39180.4	1.26652	0.0517277	0.112987	7.29034	2.86599	up
Lmdp003509	Quercetin-3-O-xyloside (Reynoutrin)*	Flavonoids	Flavonols	C20H18O11	1	549-32-6	149794	65828.1	84228.8	13165.6	13165.6	13165.6	1.2556	0.0764556	0.15052	7.59175	2.92443	up
MWStz735	Ganoderal A	Terpenoids	Triterpene	C30H44O2	3	104700-98-3	224960	293722	165425	546856	490962	595066	1.20473	0.00311431	0.0205182	0.418956	-1.25513	down
Lmjp002764	Umckalin (7-hydroxy-5,6-dimethoxycoumarin)	Lignans and Coumarins	Coumarins	C11H10O5	3	43053-62-9	11719.9	11719.9	11719.9	101093	106343	73629.9	1.28577	0.0149697	0.0514051	0.125094	-2.99892	down
Zmgp004718	1-(4-hydroxy-3-methoxyphenyl)-7-phenyl-3,5-diheptanone	Others	Ketone compounds	C20H22O4	3	-	18491	18491	18491	124508	108204	94593.3	1.28856	0.00898486	0.0383221	0.169484	-2.56078	down
MWSslk200	Scutellarein	Flavonoids	Flavones	C15H10O6	3	529-53-3	565041	587576	562267	190445	224353	358255	1.17738	0.0233633	0.065392	2.21833	1.14947	up
Yhhp003898	phlomuroside*	Terpenoids	Monoterpenoids	C19H32O8	1	-	53516	96554.8	438506	10703.2	10703.2	10703.2	1.15744	0.267207	0.375498	18.3302	4.19615	up
zjmp122401	Aseleposide E*	Terpenoids	Monoterpenoids	C19H32O8	1	-	53516	96554.8	438506	10703.2	10703.2	10703.2	1.15744	0.267207	0.375498	18.3302	4.19615	up
Lhlp120609	Dehydropicatoside A	Terpenoids	Monoterpenoids	C16H22O7	3	-	440471	406699	335403	1.31971e+06	1.4708e+06	1.39784e+06	1.28185	0.000100363	0.00384226	0.282348	-1.82445	down
MWSmce017	7,8-Dihydroxycoumarin	Lignans and Coumarins	Coumarins	C9H6O4	3	486-35-1	65947	65947	65947	1.33441e+06	383063	1.50598e+06	1.22771	0.10191	0.184834	0.0613754	-4.02619	down
Lamp006191	Afrormosin-7-O-(6''-malonyl)glucoside	Flavonoids	Isoflavones	C26H26O13	3	-	4665.52	4665.52	4665.52	41985.9	47556.9	23327.6	1.26479	0.0460325	0.104916	0.124006	-3.01152	down
Wacyp03375	1-O-Glutamoyl-3-O-Galloyl-5-O-caffeoylshikimic acid	Phenolic acids	Phenolic acids	C28H28N2O14	3	-	14087.5	9195.34	12801.5	1839.07	1839.07	1839.07	1.28138	0.0200332	0.0592421	6.54033	2.70936	up
Wacyp03558	2,7-Dimethyl-2,6-Octadiene-1,4,8-Triol 8-O-B-D-Glucopyranoside	Terpenoids	Monoterpenoids	C16H28O8	2	-	11348.7	11348.7	11348.7	83212.7	56743.3	76016.5	1.28362	0.0165577	0.0539506	0.15764	-2.66529	down
Lmsp004045	Isorhamnetin-3-O-glucoside-7-O-rhamnoside	Flavonoids	Flavonols	C28H32O16	3	17331-71-4	2452.99	2452.99	2452.99	45505.4	45940.9	12265	1.22	0.102405	0.185495	0.0709564	-3.81692	down
Qmxp082409	Minheryin G	Terpenoids	Ditepenoids	C20H30O5	3	-	14071.8	14071.8	14071.8	216842	199718	207460	1.29353	0.000651078	0.00946113	0.0676506	-3.88575	down
WaYp002866	3-(4-hydroxyphenyl)-3-oxopropyl beta-D-glucopyranoside	Phenolic acids	Phenolic acids	C15H20O8	1	53170-92-6	10412.8	10412.8	10412.8	100647	88140.6	110028	1.29163	0.0050144	0.0270072	0.10454	-3.25787	down
Lhfp110807	Petasiphenol	Tannins	Tannin	C18H16O7	3	145904-50-3	28072.3	28072.3	28072.3	198792	168797	140361	1.28562	0.0139664	0.0498164	0.165797	-2.59251	down
MWS201384	Arg-Gly	Amino acids and derivatives	Amino acids and derivatives	C8H17N5O3	3	108347-93-9	33327.7	16309.8	25778.5	3261.95	3261.95	3261.95	1.26627	0.0470931	0.106639	7.70663	2.9461	up
MW0140180	18-HEPE	Lipids	Free fatty acids	C20H30O3	3	141110-17-0	2.50569e+06	6.36621e+06	1.2426e+06	1.02207e+07	9.97558e+06	1.35803e+07	1.06819	0.0173985	0.0550816	0.299453	-1.7396	down
HX1282	Sarisan	Others	Others	C11H12O3	3	18607-93-7	554422	250076	300597	50015.3	50015.3	50015.3	1.25538	0.0774622	0.152185	7.36505	2.88069	up
Wagp010678	5-Hydroxy-3,3',4',5',7-Pentamethoxyflavone*	Flavonoids	Flavonols	C20H20O8	2	5084-19-5	11922.4	10552.5	17541.2	2110.51	2110.51	2110.51	1.27578	0.0344014	0.0841616	6.32015	2.65996	up
WaTKp04564	p-Coumaroyl-arabinofuranose	Phenolic acids	Phenolic acids	C14H16O7	3	-	127537	127537	127537	1.28936e+06	1.11262e+06	809887	1.28292	0.0213332	0.0617334	0.119124	-3.06946	down
Zbqp000676	3-(triazan-2-yl)propyl L-prolinate	Amino acids and derivatives	Amino acids and derivatives	C8H18N4O2	1	-	1.49252e+06	1.41937e+06	1.41913e+06	52757.4	52757.4	52757.4	1.29366	0.000308197	0.00665822	27.3644	4.77423	up
Lmmp003530	3,4-Divanillyltetrahydrofuran	Lignans and Coumarins	Lignans	C20H24O5	2	34730-78-4	31527.9	31527.9	31527.9	157639	1.05519e+06	1.37313e+06	1.17529	0.150006	0.243686	0.0365758	-4.77297	down
mws4168	Praeruptorin A	Lignans and Coumarins	Coumarins	C21H22O7	3	73069-25-7	507521	369775	309615	2368.24	2368.24	2368.24	1.29163	0.0214729	0.0619799	167.06	7.38422	up
Zmhp005586	Herbacetin-7-O-(3''-glucosyl)rhamnoside; Rhodiosin	Flavonoids	Flavonols	C27H30O16	3	86831-54-1	9316.98	15473.4	43186.5	1863.4	1863.4	1863.4	1.20377	0.183993	0.282828	12.16	3.60407	up
MWSHY0019	Neohesperidin	Flavonoids	Flavanones	C28H34O15	3	13241-33-3	9316.98	15473.4	43186.5	1863.4	1863.4	1863.4	1.20377	0.183993	0.282828	12.16	3.60407	up
pmp000607	1-desmethylaurantio-obtusin-2-O-β-D-glucoside	Quinones	Anthraquinone	C22H22O12	3	-	5.58908e+06	3.47029e+06	611254	122251	122251	122251	1.17538	0.164502	0.260922	26.3682	4.72073	up
Lcfp033189	7-methoxy-5,6,8-trihydroxycoumarin-5-beta-glucopyranoside	Lignans and Coumarins	Coumarins	C16H18O11	2	-	122086	87545.1	119086	17509	17509	17509	1.28486	0.0140965	0.0499192	6.25806	2.64572	up
Wbsp000161	Lannotinidine C	Alkaloids	Alkaloids	C26H35NO5	3	-	980251	941872	1.38205e+06	2.3548e+06	4.58065e+06	1.9849e+06	1.10858	0.14347	0.23589	0.370409	-1.43281	down
Lmmp003487	Luteolin-7-O-glucuronide-(2→1)-glucuronide	Flavonoids	Flavones	C27H26O18	3	-	878.18	878.18	878.18	18797.3	4390.9	25207.9	1.19972	0.131475	0.222634	0.054437	-4.19927	down
Zmsp000758	1-(Hydroxymethyl)hexahydro-1h-pyrrolizin-2-ol	Alkaloids	Pyrrole alkaloids	C8H15NO2	2	-	2.88821e+07	2.81587e+07	2.7792e+07	1.4813e+07	1.33201e+07	1.34403e+07	1.28723	4.59137e-05	0.00343869	2.04055	1.02896	up
pmp001309	6-Hydroxykaempferol-7-O-glucoside	Flavonoids	Flavonols	C21H20O12	2	-	5.05316e+06	4.6046e+06	6.32426e+06	920921	920921	920921	1.28627	0.0133862	0.0485571	5.7848	2.53227	up
Lmhp010908	LysoPC 19:1	Lipids	LPC	C27H54NO7P	3	-	4328.08	4328.08	4328.08	98648.6	92525.8	21640.4	1.20888	0.114482	0.201195	0.0610119	-4.03476	down
Hmcp001824	Ailanindole	Alkaloids	Plumerane	C12H8N2O2	3	159903-51-2	222764	358815	469640	44552.9	44552.9	44552.9	1.2646	0.0503993	0.111635	7.86496	2.97544	up
Zbkp008898	Palustradienol	Terpenoids	Ditepenoids	C20H32O	3	-	113060	113060	113060	762116	710264	565299	1.28717	0.0106494	0.0419927	0.166454	-2.58681	down
Lagp003233	3'-Hydroxy-4'-O-β-D-glucosylpuerarin*	Flavonoids	Isoflavones	C27H30O15	3	-	210598	340126	371579	42119.6	42119.6	42119.6	1.27333	0.0327888	0.0809153	7.29908	2.86771	up
Yshj000012	Isotachioside*	Phenolic acids	Phenolic acids	C13H18O8	2	31427-08-4	24686.3	24686.3	24686.3	123431	197025	181650	1.27895	0.0237969	0.065978	0.147496	-2.76125	down
Lsmp121705	Tachioside*	Phenolic acids	Phenolic acids	C13H18O8	2	109194-60-7	24686.3	24686.3	24686.3	123431	197025	181650	1.27895	0.0237969	0.065978	0.147496	-2.76125	down
Lmap001821	Helicide	Phenolic acids	Phenolic acids	C13H16O7	3	80154-34-3	91938.4	76577.3	95835.4	14865.9	14865.9	14865.9	1.28982	0.00637873	0.0313568	5.92746	2.56742	up
pmp000593	Luteolin-7-O-rutinoside*	Flavonoids	Flavones	C27H30O15	3	3563-98-2	63240.7	8290.82	46714.4	1658.16	1658.16	1658.16	1.18308	0.14617	0.239364	23.7704	4.5711	up
WaTKp05525	4a-Methyl-4a,5,8,8a-tetrahydro-2(1H)-naphthalenone	Others	Ketone compounds	C11H14O	3	17429-21-9	1.86635e+06	2.3642e+06	1.90082e+06	246377	246377	246377	1.29042	0.00788087	0.0354952	8.29539	3.05231	up
Lssp210198	2α,7β,13α-Triacetoxy-5α,9α-Dihydroxy-2(3→20)paclitaxel-4(20),11-diene-10-one	Others	Others	C26H36O9	3	-	39133.8	93346.2	70669.3	7826.75	7826.75	7826.75	1.25683	0.0625015	0.13058	8.65192	3.11302	up
Lcfp121048	hex-2-enylbenzoate	Others	Others	C13H16O2	2	28343-61-5	1.71861e+06	1.88446e+06	2.07709e+06	142941	142941	142941	1.29258	0.0034833	0.0217361	13.2459	3.72748	up
mws0154	Shikimate	Organic acids	Organic acids	C7H10O5	1	138-59-0	692372	592006	613389	1.67669e+06	1.82699e+06	1.77969e+06	1.28671	7.59708e-05	0.00346027	0.359197	-1.47715	down
Waptn06085	DGMG 18:3(2n isomer)	Lipids	Glycerol ester	C33H56O14	1	-	40635.1	43248.1	25952.2	143681	240965	230935	1.24955	0.0289132	0.073927	0.178426	-2.48661	down
Lcgn000234	davidioside C	Phenolic acids	Phenolic acids	C15H16O9	3	-	153572	167221	155859	538956	525263	498822	1.2915	0.000314135	0.00665822	0.304952	-1.71335	down
pme0534	D-Gluconic acid	Others	Saccharides	C6H12O7	1	526-95-4	1.44355e+06	1.47281e+06	1.50346e+06	190063	248247	229255	1.28916	8.59604e-07	0.000811753	6.6208	2.72701	up
Wbmn009893	3-Acetoxy-9,13-epoxy-16-hydroxy-labda-15,16-olide	Terpenoids	Ditepenoids	C22H34O6	3	-	532809	455727	427035	222495	202594	212866	1.27338	0.0123928	0.0463789	2.21892	1.14986	up
Zmtn001624	N-Acetylisatin	Alkaloids	Plumerane	C10H7NO3	3	574-17-4	6.68086e+06	6.77534e+06	6.90936e+06	1.39463e+07	1.44631e+07	1.45771e+07	1.29241	0.000195868	0.00534621	0.473767	-1.07775	down
Waln010743	1-(2,3-dihydroxypropoxy)-3-(((2-(dimethylamino)ethoxy)(hydroxy)phosphoryl)oxy)propan-2-yl (11Z,14Z)-octadeca-11,14-dienoate	Lipids	LPE	C28H54NO9P	1	-	16330.6	24647.6	15608.2	41169.8	57391.7	63417.7	1.21338	0.0206759	0.0605113	0.349343	-1.51728	down
Ylyn013135	demethylregelin	Terpenoids	Triterpene	C30H46O4	3	173991-81-6	3.74083e+06	3.92999e+06	4.20616e+06	2.11576e+07	1.99446e+07	2.13739e+07	1.2922	0.000264025	0.00639065	0.190104	-2.39514	down
Lmbn006210	Dihomo-gamma-linolenate	Lipids	Free fatty acids	C20H34O2	1	1783-84-2	122365	126440	122220	71821.6	54980.1	55246.1	1.2559	0.0053748	0.0281456	2.03806	1.0272	up
Zjbn102516	3,3'-Dihydroxy-5-methoxybibenzyl	Others	Stilbene	C15H16O3	1	-	242601	222462	253179	693185	875755	845998	1.28192	0.00855211	0.0372738	0.297416	-1.74945	down
Smln009473	Robustaflavone	Flavonoids	Biflavones	C30H18O10	3	49620-13-5	101610	107762	116008	43025.5	49703.6	44741.4	1.28236	0.00108068	0.0121836	2.36691	1.24301	up
Zazn006864	Nor-toralactone	Others	Others	C14H10O5	3	-	750401	717986	895649	1.59402e+06	1.65603e+06	1.7442e+06	1.27036	0.000306944	0.00665822	0.473352	-1.07902	down
pme2074	Jasmonoyl-L-Isoleucine	Amino acids and derivatives	Amino acids and derivatives	C18H29NO4	3	120330-93-0	394913	365279	357511	148268	151102	154983	1.29026	0.0020858	0.0164141	2.45999	1.29865	up
Xmbn007315	Chestnutlignansoide	Lignans and Coumarins	Lignans	C26H34O10	3	-	300267	303902	297629	1.80348e+06	1.90015e+06	1.83527e+06	1.29351	0.000321792	0.00665822	0.162812	-2.61872	down
Wagn011658	1-Palmitoyl-Sn-Glycerol 3-O-Diglucoside	Lipids	Glycerol ester	C31H58O14	3	-	34957.5	34942.4	29350	133802	104633	107142	1.27815	0.0103671	0.0416059	0.287201	-1.79987	down
Hmyn009687	Oxyphyllol D	Terpenoids	Sesquiterpenoids	C15H24O3	3	-	91074.3	126094	149818	28724.7	21108.4	34248	1.24713	0.0264925	0.0706854	4.36468	2.12588	up
MWSslk092	(-)-Usnic acid	Others	Ketone compounds	C18H16O7	1	125-46-2	38633	40173.6	35978.7	139777	53464.3	175698	1.06232	0.144429	0.237061	0.311122	-1.68445	down
Zbfn007626	1-Linoleoyl-2-Lysophosphatidic Acid Monobutylamine Ester	Lipids	Glycerol ester	C25H48NO7P	3	-	2.26844e+06	2.43577e+06	2.27892e+06	6.50605e+06	7.05376e+06	6.55706e+06	1.29095	0.000680827	0.00952969	0.347129	-1.52646	down
Wahsn06866	Quercetin 3-O-(3''-Z-p-coumaroylarabinoside)*	Flavonoids	Flavonols	C29H24O13	1	-	29430.4	22996.1	27714.4	49563	61143	57620.6	1.25183	0.00419313	0.0238031	0.476104	-1.07065	down
mws0918	Prunetin (5,4'-Dihydroxy-7-methoxyisoflavone)	Flavonoids	Isoflavones	C16H12O5	3	552-59-0	903319	788487	898088	1.58508e+06	1.70217e+06	2.04124e+06	1.25703	0.0162706	0.0538489	0.486047	-1.04083	down
Labn004625	2-Phenylethyl beta-primeveroside	Others	Alcohol compounds	C19H28O10	3	129932-48-5	279145	280283	366543	980885	1.03067e+06	875047	1.27344	0.000686218	0.00952969	0.320783	-1.64033	down
Labn003316	pyrocatechol-β-D-xylopyranosyl(1-6)-β-D-glucopyranoside	Phenolic acids	Phenolic acids	C17H24O11	2	-	38694.9	39105.9	28947.7	61612.4	80643.9	84120.9	1.21382	0.0159854	0.0533263	0.471551	-1.08451	down
Lmyn005812	Gingerglycolipid A	Lipids	Glycerol ester	C33H56O14	2	145937-22-0	275639	230115	232691	1.66511e+06	1.78805e+06	1.28296e+06	1.28361	0.0121713	0.0460124	0.155918	-2.68114	down
Wahsn10570	1-O-Feruloyl 9,10,12,13-tetrahydroxynonadecanoic acid	Lipids	Free fatty acids	C29H46O9	1	-	1.10167e+07	1.09498e+07	1.11255e+07	4.72831e+06	5.14162e+06	4.84517e+06	1.29123	5.95328e-05	0.00343869	2.24885	1.16918	up
pme2914	3-Hydroxy-3-methylglutarate	Organic acids	Organic acids	C6H10O5	1	503-49-1	3.46021e+07	3.35235e+07	3.41143e+07	7.95423e+06	8.04811e+06	7.9006e+06	1.29358	0.000109087	0.00405919	4.27729	2.0967	up
Zmyn000155	N-Acetylornithine	Amino acids and derivatives	Amino acids and derivatives	C7H14N2O3	3	6205-08-9	3.59256e+07	3.5135e+07	3.52509e+07	1.63634e+07	1.52015e+07	1.6228e+07	1.29132	6.21158e-06	0.00134906	2.22442	1.15343	up
MWStz507	Chrysosplenol D	Flavonoids	Flavonols	C18H16O8	3	14965-20-9	38080.7	41855.4	28383	178045	129051	198879	1.26166	0.0203473	0.0598587	0.21408	-2.22378	down
Hmmn007137	Pinostilbene; 3,4'-dihydroxy-5-methoxystilbene	Others	Stilbene	C15H14O3	1	42438-89-1	7.83231e+06	7.78673e+06	7.92965e+06	1.68393e+07	1.99271e+07	2.06197e+07	1.28092	0.0103722	0.0416059	0.410355	-1.28506	down
Lmbn001162	Cichoriin*	Lignans and Coumarins	Coumarins	C15H16O9	3	531-58-8	193962	139530	140406	543085	581463	596665	1.27495	7.27351e-05	0.00346027	0.275328	-1.86078	down
pme2710	Dihydrojasmonic acid	Organic acids	Organic acids	C12H20O3	3	3572-64-3	879656	920909	1.15453e+06	1.98849e+06	2.54215e+06	2.60049e+06	1.24804	0.00953476	0.0392915	0.414393	-1.27093	down
Wahsn13323	1-O-Feruloyl 2,3-dihydroxypropyl 16-hydroxyhexadecanoate	Lipids	Free fatty acids	C29H46O8	3	-	66281.7	63446.8	73010.8	21603.2	22905.9	19356.1	1.28576	0.00147397	0.0141093	3.17448	1.66652	up
Zbhn006453	Pedalitin	Flavonoids	Flavones	C16H12O7	3	22384-63-0	267004	227771	232592	102679	102123	107952	1.28356	0.00689045	0.0326979	2.32568	1.21765	up
Cmcn011220	Imbricatolic acid	Terpenoids	Ditepenoids	C20H34O3	3	6832-60-6	162535	155194	146874	40068.6	34939.6	34002.5	1.2895	0.000329373	0.0066651	4.26199	2.09153	up
Wahsn08835	Chrysoeriol-7-O-(4'',6''-di-(E)-p-coumaroylglucoside)	Flavonoids	Flavones	C40H34O15	2	-	29744.9	20404.9	27004	11121.3	10774.2	16329.8	1.15971	0.0229469	0.0648785	2.01839	1.01321	up
Cmsn002371	Isolariciresinol-9-O-xyloside	Lignans and Coumarins	Lignans	C25H32O10	2	-	833139	701709	739872	1.36456e+06	2.9295e+06	2.15946e+06	1.17686	0.0899732	0.169251	0.352477	-1.5044	down
Lcfn143038	10-hydroxydecanoicacid10-O-beta-D-glucopyranoside	Lipids	Free fatty acids	C16H30O8	3	-	1.5355e+06	1.60531e+06	1.53884e+06	443473	419878	436463	1.29298	0.000136643	0.00444953	3.60025	1.8481	up
Zahn004036	2,3-Dihydro-1,4-naphthoquinone	Quinones	Quinones	C10H8O2	3	21545-31-3	213024	267642	195975	132834	60508.3	110686	1.10677	0.0150535	0.0514612	2.22559	1.15418	up
pmn001687	Cis-Coutaric acid	Phenolic acids	Phenolic acids	C13H12O8	2	67920-37-0	80131.7	179104	204731	397883	405184	466234	1.13332	0.00734582	0.033949	0.365529	-1.45194	down
Lcsn006335	2-Hydroxymyristic acid	Lipids	Free fatty acids	C14H28O3	3	2507-55-3	255893	225294	237907	493216	488694	529832	1.28447	0.000172127	0.00518763	0.475672	-1.07196	down
Lcfn121126	4-Methylene-2-octyl-5-oxotetrahydrofuran-3-carboxylicacid(C75)	Others	Lactones	C14H22O4	2	218137-86-1	1.49558e+06	1.47973e+06	1.31175e+06	3.6907e+06	5.04238e+06	4.57951e+06	1.27324	0.0153282	0.0520681	0.32203	-1.63473	down
Cmsn006847	2-methoxy-9,10-dihydrophenanthrene-4,5-diol	Quinones	PhenAnthraquinones	C15H14O3	1	70205-50-4	661239	688533	737068	1.38195e+06	1.6449e+06	1.71765e+06	1.27322	0.0102797	0.0414258	0.439844	-1.18494	down
Zasn010461	Methyl 14-methylpentadecanoate	Lipids	Free fatty acids	C17H34O2	3	5129-60-2	4.36643e+06	4.19697e+06	4.07367e+06	1.5264e+06	1.26923e+06	1.40864e+06	1.28682	1.78252e-05	0.0021948	3.00577	1.58773	up
Zmtn001464	Xanthurenic acid	Alkaloids	Quinoline alkaloids	C10H7NO4	3	59-00-7	3.83028e+06	3.85874e+06	3.77988e+06	1.76753e+06	1.78351e+06	1.87847e+06	1.2919	4.7422e-06	0.00134906	2.11232	1.07883	up
Lmxn007955	Sudachitin	Flavonoids	Flavones	C18H16O8	1	4281-28-1	69539.5	71587.3	66192.4	229722	298966	241776	1.28317	0.0123488	0.0462755	0.269083	-1.89388	down
Lmxn015337	Methyl palmitate	Lipids	Free fatty acids	C17H34O2	3	112-39-0	51473	51672.5	43683.7	19224.6	15442.7	22528.7	1.25269	0.0011178	0.0122333	2.56712	1.36015	up
Zbln005108	3,4-Dihydroxyallylbenzene-4-O-xylosyl(1→6)glucoside	Phenolic acids	Phenolic acids	C20H28O11	3	-	604376	637641	708651	247230	236435	271108	1.28294	0.00297015	0.0199779	2.58444	1.36985	up
pmc1990	4'-Hydroxy-5,7-dimethoxyflavanone	Flavonoids	Flavanones	C17H16O5	3	-	68630.4	58266.9	74394.8	488931	638036	452821	1.28404	0.0143888	0.05045	0.127417	-2.97237	down
Wayn005368	3,3'-Di-O-Methylellagic acid 4'-glucoside	Tannins	Tannin	C22H20O13	3	51803-68-0	515028	641898	585090	1.56905e+06	2.29643e+06	1.45709e+06	1.24531	0.0429771	0.0994724	0.327288	-1.61137	down
MWStz400	Nortrachelogenin	Lignans and Coumarins	Lignans	C20H22O7	3	34444-37-6	242920	231160	234572	98759.8	96586.2	85776.2	1.28734	1.36519e-05	0.0019338	2.5208	1.33388	up
Safn007426	Naringenin 7-O-β-D-glucoside 6''-acetate	Flavonoids	Flavones	C23H24O11	2	-	43744.6	62933.7	48119.3	126093	133763	124482	1.25752	0.00148232	0.0141395	0.402764	-1.31199	down
Lmjn005592	Cirsilineol	Flavonoids	Flavones	C18H16O7	1	41365-32-6	48829.5	43698.2	35663.8	111643	169968	117979	1.24409	0.0346675	0.0845208	0.320808	-1.64022	down
Zmhn002422	1-O-Feruloyl-D-Glucose*	Phenolic acids	Phenolic acids	C16H20O9	2	-	1.91877e+06	1.78261e+06	1.99398e+06	4.78152e+06	3.90249e+06	4.68377e+06	1.2754	0.00900901	0.0383221	0.426052	-1.2309	down
pme3096	Aminomalonate	Amino acids and derivatives	Amino acids and derivatives	C3H5NO4	3	1068-84-4	1.13412e+06	976076	988846	443777	434444	482890	1.28101	0.00459535	0.0253281	2.27684	1.18704	up
mws0282	Tryptophan	Amino acids and derivatives	Amino acids and derivatives	C11H12N2O2	1	54-12-6	4.29261e+07	4.14822e+07	4.00012e+07	1.77114e+07	1.74142e+07	1.75319e+07	1.29217	0.00112358	0.0122333	2.36262	1.24039	up
MWStz427	Trachelogenin	Lignans and Coumarins	Lignans	C21H24O7	2	34209-69-3	427557	426420	429114	201665	180851	203551	1.28768	0.000869802	0.0110571	2.18932	1.13049	up
Wayn005907	Quercetin 3-(2''-acetylrhamnoside)*	Flavonoids	Flavonols	C23H22O12	1	-	209428	211649	183538	726587	768076	744684	1.29019	7.14293e-06	0.00134906	0.269996	-1.88899	down
mws1409	UDP-glucuronate	Nucleotides and derivatives	Nucleotides and derivatives	C15H22N2O18P2	3	-	680359	739733	743901	231897	181779	162889	1.27699	5.35761e-05	0.00343869	3.75325	1.90814	up
Zmfn007793	2,3-dihydroxy-7-methoxy-9,10-dihydro-phenanthrene	Quinones	PhenAnthraquinones	C15H14O3	1	-	372673	373582	387813	825007	974745	1.06841e+06	1.27615	0.0143674	0.05045	0.395399	-1.33862	down
Lmqn003292	4,5,8-Trihydroxy-α-tetralone-5-O-glucoside	Quinones	Naphthol	C16H20O9	3	-	1.86713e+06	1.84836e+06	2.04229e+06	5.31109e+06	5.54133e+06	5.64753e+06	1.29062	3.24426e-05	0.00308717	0.348957	-1.51888	down
MWSHC2062	Ferulic β-glucoside*	Phenolic acids	Phenolic acids	C16H20O9	2	14364-12-6	1.86713e+06	1.84836e+06	2.04229e+06	5.31109e+06	5.54133e+06	5.64753e+06	1.29062	3.24426e-05	0.00308717	0.348957	-1.51888	down
MWStz479	3-Methoxyapigenin	Flavonoids	Flavonols	C16H12O6	3	1592-70-7	57187.8	64170.2	29511.7	123905	186422	135654	1.16414	0.0190308	0.0575391	0.338288	-1.56368	down
Wahsn10880	1-O-Feruloyl 9,10-Dihydroxypalmitic acid	Lipids	Free fatty acids	C26H40O7	3	-	112404	112690	118184	19901.4	22974.3	20698.7	1.29184	3.26915e-05	0.00308717	5.39963	2.43286	up
Zapn006835	Pinosylvin	Others	Stilbene	C14H12O2	1	22139-77-1	2.16587e+06	2.30711e+06	2.89921e+06	4.70805e+06	5.9607e+06	6.18598e+06	1.23996	0.00939192	0.038916	0.437396	-1.19299	down
Zbnn006442	Eriodictyol	Flavonoids	Flavanones	C15H12O6	3	552-58-9	169905	139753	172046	74579.7	63961.2	94768.6	1.21645	0.00413444	0.0237637	2.06466	1.0459	up
Wbtn006810	6,7-dihydroxy-1,3-dimethoxyxanthen-9-one	Flavonoids	Other Flavonoids	C15H12O6	3	-	535180	483617	589700	241014	198299	269565	1.25255	0.00214393	0.0166861	2.26908	1.18211	up
ZBN0129	Quercetin-3-O-(2''-O-acetyl)rhamnoside*	Flavonoids	Flavonols	C23H22O12	1	-	233658	180224	191917	752787	684446	766591	1.28263	0.000182618	0.00534621	0.274886	-1.8631	down
Zbqn006065	Datiscetin	Flavonoids	Flavonols	C15H10O6	3	480-15-9	94485.2	81405.8	86463.4	36257.5	45443.6	38581.8	1.26745	0.000862468	0.0110571	2.18114	1.12509	up
MWSHC2022	Glucosyringic acid	Phenolic acids	Phenolic acids	C15H20O10	1	33228-65-8	1.62958e+07	1.65675e+07	1.77835e+07	7.70914e+06	7.40616e+06	7.72262e+06	1.29006	0.00159525	0.0143929	2.21766	1.14904	up
Lmmn003398	Kaempferol-3-O-(6''-O-acetyl)glucoside	Flavonoids	Flavonols	C23H22O12	3	-	283636	263259	239689	121567	128253	116498	1.27992	0.00536874	0.0281456	2.14727	1.1025	up
Wahsn06646	Quercetin 3-O-(2''-Z-p-coumaroylarabinoside)*	Flavonoids	Flavonols	C29H24O13	1	-	17234.8	20005.2	27405.3	46824.7	52429.1	67364.9	1.21541	0.0166166	0.0539506	0.387983	-1.36593	down
Zmdn005358	Vladinol D	Lignans and Coumarins	Lignans	C20H22O7	3	-	1.05023e+06	895101	1.46365e+06	456701	613658	456813	1.18315	0.055421	0.118882	2.23222	1.15848	up
Lmbn007891	Hydroxy ricinoleic acid	Lipids	Free fatty acids	C18H34O4	3	-	151800	140489	147226	320098	286241	309178	1.28616	0.00184327	0.0154497	0.480072	-1.05868	down
mws0179	Chlorogenic acid methyl ester	Phenolic acids	Phenolic acids	C17H20O9	2	29708-87-0	398827	404337	429716	1.84748e+06	1.67151e+06	1.64925e+06	1.29145	0.00187328	0.0156549	0.238549	-2.06764	down
mws0192	Succinate*	Organic acids	Organic acids	C4H6O4	1	110-15-6	652525	570304	603015	259917	268006	280940	1.28577	0.00316846	0.0205232	2.2573	1.1746	up
mws0470	Methylmalonic acid*	Organic acids	Organic acids	C4H6O4	1	516-05-2	652525	570304	603015	259917	268006	280940	1.28577	0.00316846	0.0205232	2.2573	1.1746	up
MWSmce248	3-Hydroxycinnamic Acid*	Phenolic acids	Phenolic acids	C9H8O3	3	14755-02-3	1.51269e+06	1.51985e+06	1.23274e+06	711163	387619	423283	1.20967	0.00285517	0.0195574	2.8023	1.48661	up
Lmtn004049	Abscisate	Terpenoids	Sesquiterpenoids	C15H20O4	2	21293-29-8	459725	445731	442213	227227	204282	158141	1.25259	0.00415949	0.0237637	2.28554	1.19254	up
Wbwn005757	(2r,3r,4s)-6-hydroxy-4-(4-hydroxy-3-methoxyphenyl)-7-methoxy-2,3-dimethyl-3,4-dihydro-2h-naphthalen-1-one	Lignans and Coumarins	Lignans	C20H22O5	3	-	1.24163e+06	1.29984e+06	1.22786e+06	3.74741e+06	3.70053e+06	3.33241e+06	1.28977	0.00251647	0.0182882	0.349648	-1.51602	down
Labn002716	galloyl acetyl glucoside	Phenolic acids	Phenolic acids	C15H18O11	3	-	29048.2	32426.3	25060.1	484552	442412	534212	1.29098	0.00317244	0.0205232	0.0592226	-4.07771	down
WaYn003347	Glochiflavanoside A	Flavonoids	Flavanols	C23H28O11	3	-	7.21766e+06	7.74929e+06	7.90337e+06	2.82611e+06	3.09801e+06	3.1962e+06	1.28732	0.000266183	0.00639065	2.50762	1.32632	up
Wamxn05520	1-Octen-3-Yl Primeveroside	Others	Alcohol compounds	C19H34O10	3	-	37136.2	13505.7	34444.9	305872	840226	387020	1.23604	0.100688	0.183203	0.0554992	-4.17139	down
pmn001515	3-Galloylshikimic acid	Phenolic acids	Phenolic acids	C14H14O9	2	110082-91-2	22092.6	23911.6	25875.4	83834.4	77084.1	83629.6	1.28884	0.00020902	0.00538605	0.293928	-1.76646	down
Waptn03329	Benzyl 6-O-beta-D-apiofuranosyl-beta-D-glucoside*	Others	Alcohol compounds	C18H26O10	3	115009-57-9	137087	192345	227475	47266.2	140181	57561.9	1.01189	0.0586128	0.124569	2.27301	1.1846	up
Hahn002084	6'-O-caffeoylcatalpol	Terpenoids	Monoterpenoids	C24H28O13	3	-	216928	255627	279163	674594	657570	724678	1.27799	9.48546e-05	0.00371246	0.365472	-1.45217	down
Wbkn005292	[(1S,2S,3S,7R,9R,13S,14R,15R,17S)-3,15-diacetyloxy-7-hydroxy-2,6,14-trimethyl-4,11,16-trioxo-10-oxatetracyclo[7.7.1.02,7.013,17]heptadec-5-en-17-yl]methylacetate	Terpenoids	Ditepenoids	C26H32O11	3	-	3.98303e+06	2.00389e+06	1.8125e+06	6.87581e+06	6.02745e+06	1.0765e+07	1.14293	0.0498773	0.11116	0.329531	-1.60152	down
pme3705	D-Glucuronate*	Others	Saccharides	C6H10O7	1	528-16-5	2.31815e+07	2.17229e+07	2.25588e+07	4.98066e+06	4.97434e+06	4.96522e+06	1.29331	0.000580868	0.00894985	4.5216	2.17683	up
mws1189	D-Galacturonate*	Others	Saccharides	C6H10O7	1	685-73-4	2.31815e+07	2.17229e+07	2.25588e+07	4.98066e+06	4.97434e+06	4.96522e+06	1.29331	0.000580868	0.00894985	4.5216	2.17683	up
pmn001468	Sibiricose A3	Phenolic acids	Phenolic acids	C19H26O13	3	139726-39-9	162342	185543	162379	43672.7	130599	29804.5	1.01297	0.0761403	0.150004	2.50035	1.32213	up
pme3083	Formylanthranilate	Phenolic acids	Phenolic acids	C8H7NO3	3	3342-77-6	1.15057e+06	1.14717e+06	1.07307e+06	348129	285790	382562	1.27985	3.57063e-05	0.00310745	3.31615	1.72951	up
Wcdn004141	2-[3-[4-[1,3-dihydroxy-1-(4-hydroxy-3-methoxyphenyl)propan-2-yl]oxy-3-methoxyphenyl]propoxy]-6-(hydroxymethyl)oxane-3,4,5-triol	Others	Others	C26H36O12	3	-	1.58121e+06	1.74597e+06	1.5489e+06	4.18468e+06	4.25876e+06	4.23452e+06	1.28978	0.000139749	0.00449897	0.384612	-1.37853	down
Waptn03150	Benzyl alcohol xylopyranosyl-(1-6)-glucopyranoside*	Others	Alcohol compounds	C18H26O10	3	-	187105	200185	92185.7	44463.9	68265.1	67670.9	1.10591	0.092639	0.17296	2.65784	1.41026	up
Cmsn002480	Secoisolariciresinol-9'-O-glucoside	Lignans and Coumarins	Lignans	C26H36O11	1	63320-67-2	176584	175846	170452	54855.6	43462.4	36120.2	1.27394	0.000610433	0.00915003	3.88939	1.95954	up
mws0021	Resveratrol	Others	Stilbene	C14H12O3	3	501-36-0	96983.7	98358.6	114951	216565	293674	273095	1.26022	0.0161187	0.0534449	0.396119	-1.33599	down
Lcfn066903	3-Hydroxyoctanedioicacid	Lipids	Free fatty acids	C8H14O5	3	73141-47-6	1.13928e+06	1.0937e+06	961156	513365	468960	570593	1.2656	0.00253053	0.0182882	2.05686	1.04044	up
Yaan000442	(3S,4S,5R)-2-(((2R,3S,4S,5R,6R)-6-(((2S,3S,4S,5R)-3,4-dihydroxy-2,5-bis(hydroxymethyl)tetrahydrofuran-2-yl)oxy)-3,4,5-trihydroxytetrahydro-2H-pyran-2-yl)methoxy)-3,4,5-trihydroxycyclohexane-1-carboxylic acid	Others	Others	C19H32O16	3	-	297790	375671	217008	1.36832e+06	1.1423e+06	842402	1.2322	0.0248629	0.0682217	0.265571	-1.91283	down
Cmyn001328	Daphnin*	Lignans and Coumarins	Coumarins	C15H16O9	3	486-55-5	172122	197216	172618	502456	506298	546190	1.28741	0.000144041	0.0045341	0.348538	-1.52061	down
mws1015	Esculin (6,7-Dihydroxycoumarin-6-O-glucoside)*	Lignans and Coumarins	Coumarins	C15H16O9	3	531-75-9	172122	197216	172618	502456	506298	546190	1.28741	0.000144041	0.0045341	0.348538	-1.52061	down
Wacn002147	2-O-(1'-O-glucosyl-p-Coumaroyl)hydroxycitric Acid	Phenolic acids	Phenolic acids	C21H24O15	2	-	154197	115606	114467	35278	25840.7	38292	1.26124	0.0130732	0.047848	3.86548	1.95065	up
Safn004271	butyl 3-{[3,4,5-trihydroxy-6-(hydroxymethyl)oxan-2-yl]oxy}butanoate	Others	Others	C14H26O8	2	-	190129	249220	205746	524921	489740	437265	1.25889	0.00160663	0.0144037	0.444303	-1.17039	down
Lmfn003035	6-O-p-Coumaroyl-β-D-glucose	Phenolic acids	Phenolic acids	C15H18O8	1	114297-65-3	192795	209110	220849	482631	561315	487463	1.28124	0.00383019	0.0229092	0.406654	-1.29813	down
Wahln03616	Demethylsyringin	Lignans and Coumarins	Lignans	C16H22O9	1	-	1.64574e+06	1.77259e+06	1.75909e+06	732210	661149	633259	1.28674	5.84863e-05	0.00343869	2.5547	1.35316	up
Wcdn003654	Feruloyl Lactate	Organic acids	Organic acids	C13H14O7	1	-	1.38146e+06	1.13724e+06	1.35787e+06	287520	231982	301400	1.28273	0.00359151	0.0222674	4.72233	2.2395	up
mws1360	Aromadendrin-3-O-rhamnoside; Engeletin	Flavonoids	Flavanonols	C21H22O10	3	572-31-6	150834	156144	114095	44189.9	38428.6	58070.9	1.24429	0.00973101	0.0397806	2.99293	1.58156	up
pmb3072	3-O-p-Coumaroylshikimic acid-O-glucoside	Phenolic acids	Phenolic acids	C22H26O12	1	-	628002	638038	557261	300398	246070	267390	1.27367	0.000899826	0.0111818	2.24031	1.1637	up
Wchn003633	4'-Hydroxy-2'-Methoxyphenol 1-O-Beta-D-(6-O-Syringoyl) Glucopyranoside	Phenolic acids	Phenolic acids	C22H26O12	1	-	386816	402596	400340	119299	147646	136534	1.28499	5.73912e-05	0.00343869	2.94873	1.5601	up
Wdzn000513	methyl alpha-D-fructofuranoside*	Others	Saccharides	C7H14O6	2	-	7.52219e+07	7.51431e+07	7.49433e+07	7.1249e+06	7.38322e+06	7.2146e+06	1.29368	5.33985e-11	7.56389e-08	10.372	3.37462	up
mws2104	D-Pinitol*	Others	Saccharides	C7H14O6	2	10284-63-6	7.52219e+07	7.51431e+07	7.49433e+07	7.1249e+06	7.38322e+06	7.2146e+06	1.29368	5.33985e-11	7.56389e-08	10.372	3.37462	up
pme0513	Xylitol*	Others	Saccharides	C5H12O5	3	87-99-0	128020	118713	119266	33145	27937.1	48506.3	1.24971	0.00131417	0.0130769	3.33975	1.73974	up
mws0438	L-Arabitol*	Others	Saccharides	C5H12O5	3	488-82-4	128020	118713	119266	33145	27937.1	48506.3	1.24971	0.00131417	0.0130769	3.33975	1.73974	up
Rfn063680	2-β-D-Glucopyranosyloxy-4-methoxy-cis-cinnamic acid	Phenolic acids	Phenolic acids	C16H20O9	2	-	144005	165789	160358	401216	380823	395831	1.28746	1.28517e-05	0.00191626	0.399155	-1.32498	down
ZBN0148	Laricitrin-3-O-rhamnoside	Flavonoids	Flavonols	C22H22O12	3	-	406725	407650	392902	1.24644e+06	769686	1.04577e+06	1.23572	0.0463637	0.105501	0.39429	-1.34267	down
pmn001419	p-Coumaroyl-D-glucose	Phenolic acids	Phenolic acids	C15H18O8	1	7139-64-2	111380	127059	150411	315222	201810	356379	1.16151	0.0655635	0.135281	0.445209	-1.16745	down
Wamxn00739	Methyl Alpha-D-Galactopyranoside	Others	Alcohol compounds	C7H14O6	2	-	2.55875e+07	2.61236e+07	2.31534e+07	4.35007e+06	4.12043e+06	5.63968e+06	1.28391	0.000287213	0.00654802	5.30571	2.40754	up
Cmjn004337	Benzyl-(2''-O-xylosyl)glucoside	Others	Others	C18H26O10	3	-	92667.1	68665.3	71151.2	168547	138316	175082	1.23018	0.00558989	0.0291106	0.482387	-1.05174	down
Lamn006359	4'-demethyl-3,9-dihydroeucomin glucoside	Flavonoids	Other Flavonoids	C22H24O10	2	-	1.48168e+07	1.42438e+07	1.51787e+07	3.6997e+06	3.25273e+06	3.01182e+06	1.28917	9.97432e-06	0.00159817	4.43981	2.1505	up
Zbjn003642	1-O-rhamnose-3-O-Caffeoyl Quinic Acid	Phenolic acids	Phenolic acids	C22H28O13	3	-	313337	363431	401744	157209	180301	178734	1.26065	0.0127635	0.0471435	2.08915	1.06292	up
Wcfn003424	Coumaroyl Quinic Acid	Others	Others	C16H18O8	3	-	8.58349e+06	6.56326e+06	6.99508e+06	1.88409e+07	1.80368e+07	1.50348e+07	1.25542	0.0045531	0.0252425	0.426523	-1.22931	down
pmn001421	3-O-p-Coumaroylquinic acid	Phenolic acids	Phenolic acids	C16H18O8	1	87099-71-6	8.58349e+06	6.56326e+06	6.99508e+06	1.88409e+07	1.80368e+07	1.50348e+07	1.25542	0.0045531	0.0252425	0.426523	-1.22931	down
Lmln001856	5,7-Dihydroxy-4-oxo-2-(3,4,5-trihydroxyphenyl)-4H-chromen-3-yl-alloside	Others	Others	C21H20O13	2	-	1.16573e+06	1.14507e+06	1.08522e+06	2.5157e+06	2.14564e+06	2.19106e+06	1.27845	0.00797122	0.0355789	0.495596	-1.01276	down
mws0178	Chlorogenate*	Phenolic acids	Phenolic acids	C16H18O9	1	327-97-9	303499	324382	263676	662884	565079	601277	1.26534	0.00166256	0.0146449	0.487392	-1.03685	down
pme1816	Neochlorogenic acid*	Phenolic acids	Phenolic acids	C16H18O9	1	906-33-2	352489	411807	322456	940066	853813	784121	1.26744	0.00183346	0.015413	0.421548	-1.24623	down
mws0056	Myricitrin	Flavonoids	Flavonols	C21H20O12	2	17912-87-7	95109.1	114214	161584	281083	259488	276296	1.20654	0.0109191	0.0424395	0.454061	-1.13904	down
Zbkn004627	cyclo-Dopa 5-O-glucoside	Alkaloids	Alkaloids	C15H19NO9	3	-	207975	238048	201371	427870	480750	455899	1.27658	0.000368624	0.00691597	0.474449	-1.07568	down
pme2435	L-Fucose	Others	Saccharides	C6H12O5	3	-	816031	730840	862732	200021	188636	187718	1.29018	0.00367094	0.0225103	4.18062	2.06372	up
pmn001640	Myricetin-3-O-arabinoside*	Flavonoids	Flavonols	C20H18O12	1	132679-85-7	436444	369557	430408	1.31621e+06	1.30481e+06	1.45956e+06	1.28635	0.000721846	0.00987619	0.302999	-1.72262	down
Lmfn003630	Myricetin-3-O-xyloside*	Flavonoids	Flavonols	C20H18O12	1	-	384619	455007	428890	1.44091e+06	1.57118e+06	1.61623e+06	1.28814	0.000659359	0.00946113	0.274077	-1.86735	down
Zmsn002929	7R-O-morroniside	Others	Others	C17H26O11	2	-	35214.4	69795.3	54540.8	121714	249102	125190	1.13203	0.108711	0.193333	0.321671	-1.63634	down
WaYn002948	Pyrocatechol monoglucoside	Others	Others	C12H16O7	3	2400-71-7	69464.8	50209.5	51265.2	144186	138498	144001	1.26138	0.00299091	0.0199779	0.400622	-1.31969	down
Wahsn11794	3-O-p-Coumaroyl 2,3-dihydroxypropyl-3-Hydroxytetradecanoate	Lipids	Free fatty acids	C26H40O7	1	-	414232	1.14659e+06	528231	2.25905e+06	1.78642e+06	2.0492e+06	1.13828	0.0121974	0.0460124	0.342767	-1.5447	down
Wacn003131	2-O-P-Coumaroylhydroxycitric Acid	Phenolic acids	Phenolic acids	C15H14O10	2	-	4.48722e+06	3.85547e+06	4.7193e+06	2.12273e+06	2.03753e+06	1.97348e+06	1.2752	0.010616	0.0419927	2.12953	1.09054	up
Smln008909	Aloebarbendol	Phenolic acids	Phenolic acids	C15H14O4	3	194145-93-2	121177	124274	190165	321392	344088	387485	1.22252	0.00246537	0.0181255	0.413704	-1.27333	down
MWS4471	N-Alpha-Acetyl-L-Asparagine	Amino acids and derivatives	Amino acids and derivatives	C6H10N2O4	2	4033-40-3	459646	630354	395272	1.65595e+06	1.07213e+06	1.29652e+06	1.21227	0.0249339	0.0682217	0.369048	-1.43812	down
Wasn006102	Apiosylrhododendrin	Phenolic acids	Phenolic acids	C21H32O11	3	-	1.25766e+06	926795	1.38148e+06	518379	570104	427755	1.22219	0.0286319	0.0734729	2.35184	1.23379	up
Zmhn001905	HydroxyAloe-emodin-8-O-glucoside	Quinones	Anthraquinone	C21H20O11	1	-	3.62362e+06	3.22876e+06	3.6625e+06	1.15758e+06	990305	1.00236e+06	1.28639	0.00107224	0.0121836	3.3378	1.7389	up
Waln011009	2-(2,3-dihydroxypropoxy)-3-(((2-(dimethylamino)ethoxy)(hydroxy)phosphoryl)oxy)propyl (11Z,14Z)-octadeca-11,14-dienoate	Lipids	LPE	C28H54NO9P	1	-	20645.7	25879.7	28449.4	84281.7	60082.2	75910.2	1.25315	0.0139452	0.0498164	0.34037	-1.55482	down
Wagn012030	2-Palmitoyl-Sn-Glycerol 3-O-Diglucoside	Lipids	Glycerol ester	C31H58O14	3	-	31486.6	24030.9	26432.7	99802.4	133840	126111	1.27717	0.00964424	0.0395973	0.227795	-2.13419	down
Lakn001671	2-β-D-Glucopyranosyloxy-5-hydroxy-phenylacetic acid	Phenolic acids	Phenolic acids	C14H18O9	1	-	5.31702e+06	4.78478e+06	5.12017e+06	1.51667e+06	1.37791e+06	1.59852e+06	1.28878	0.000471359	0.00832933	3.38786	1.76037	up
Safn006268	Pterosupin	Flavonoids	Chalcones	C21H24O10	3	-	3.24608e+06	3.02618e+06	3.28532e+06	41620.1	21694.7	46252.6	1.28658	0.000594959	0.00901347	87.2302	6.44676	up
Wahsn07345	Kaempferide-3-O-(3''-Z-p-coumaroylarabinoside)	Flavonoids	Flavonols	C30H26O12	1	-	358465	329342	339441	719108	861909	691542	1.27262	0.013984	0.0498164	0.452023	-1.14553	down
mws0376	Fumarate	Organic acids	Organic acids	C4H4O4	1	110-17-8	4.0955e+06	3.20031e+06	3.36443e+06	1.66094e+06	1.8633e+06	1.69869e+06	1.25949	0.0182567	0.0561422	2.04105	1.02931	up
mws1024	4-Hydroxycinnamyl aldehyde	Others	Aldehyde compounds	C9H8O2	3	2538-87-6	73383.7	55690.1	82292.3	31495.7	41840	22971.8	1.14819	0.0197393	0.0586793	2.1947	1.13402	up
mws0159	Phenylpyruvate	Phenolic acids	Phenolic acids	C9H8O3	3	156-06-9	127011	159457	127460	83513.3	65799.4	46815.7	1.16692	0.00857837	0.0372738	2.11049	1.07758	up
mws2108	Cryptochlorogenic acid (4-O-Caffeoylquinic acid)*	Phenolic acids	Phenolic acids	C16H18O9	1	905-99-7	217326	300505	387517	596731	1.00879e+06	619539	1.14258	0.0672738	0.137546	0.406888	-1.2973	down
mws0597	5-Hydroxyindoleacetate	Alkaloids	Plumerane	C10H9NO3	3	54-16-0	69504.9	72958.3	77358.8	289600	306612	298132	1.29209	5.1281e-05	0.00343869	0.245791	-2.02449	down
pmb2653	DMelezitose O-rhamnoside	Others	Saccharides	C24H42O20	3	-	171804	112383	109609	295684	306726	394943	1.21564	0.00889302	0.0381126	0.394841	-1.34066	down
Wahsn05900	4-(3-hydroxy-2-(4-(3-hydroxyprop-1-en-1-yl)phenoxy)propyl)-2-methoxyphenol glucoside	Lignans and Coumarins	Lignans	C25H32O10	1	-	995356	1.08673e+06	918253	552720	410446	350513	1.22572	0.00221698	0.0170671	2.28392	1.19151	up
ZbBn000907	Shikimic Acid-3-Phosphate	Organic acids	Organic acids	C7H11O8P	3	114489-69-9	141119	125665	145303	335022	280261	265910	1.2639	0.0125703	0.0468575	0.467647	-1.09651	down
pmn001643	Isolariciresinol-9'-O-rhamnoside (Aviculin)	Lignans and Coumarins	Lignans	C26H34O10	3	156765-33-2	382676	432665	410989	146818	162133	145038	1.28725	0.00113567	0.0122333	2.70123	1.43362	up
Zbfn006124	2,6-Di-Feruloyl glucoside	Phenolic acids	Phenolic acids	C26H28O12	3	-	24451.9	26818.6	34453.1	55718.1	53401.8	72293.2	1.21274	0.0178517	0.0555758	0.472533	-1.08151	down
Zbfn003303	3-(Hydroxycinnamoyl)-quinic acid*	Phenolic acids	Phenolic acids	C16H18O8	1	-	234131	175668	205213	583779	447222	437118	1.24365	0.0174986	0.0550816	0.418912	-1.25528	down
pme2529	1,5-Anhydro-D-glucitol	Others	Saccharides	C6H12O5	3	154-58-5	1.43326e+06	1.50204e+06	1.36775e+06	635558	595562	635110	1.28931	0.00088955	0.0111509	2.30574	1.20523	up
HJN104	Dihydromyricetin-3-O-glucoside	Flavonoids	Flavanonols	C21H22O13	3	-	772665	659095	670648	280218	245786	201177	1.26768	0.000991859	0.0117155	2.89118	1.53166	up
Zaxn006117	torreyagrandate	Terpenoids	Ditepenoids	C21H30O3	3	-	2.12299e+06	2.24563e+06	2.16547e+06	324752	324752	324752	1.29354	0.000376218	0.00701202	6.70675	2.74561	up
Zbjn008081	Kaempferide*	Flavonoids	Flavonols	C16H12O6	3	491-54-3	5396.36	5396.36	5396.36	36870.9	26981.8	37711.1	1.28478	0.0143393	0.05045	0.159398	-2.64929	down
Zbrn008158	Chrysoeriol*	Flavonoids	Flavones	C16H12O6	3	491-71-4	5396.36	5396.36	5396.36	36870.9	26981.8	37711.1	1.28478	0.0143393	0.05045	0.159398	-2.64929	down
Hmqn003268	Dihydrotricetin	Flavonoids	Flavanones	C15H12O7	3	-	772192	688179	712612	150095	84792.4	113981	1.27286	6.99268e-05	0.00346027	6.22867	2.63892	up
mws1454	Persicoside*	Flavonoids	Flavanones	C23H26O11	3	28978-03-2	237766	237766	237766	4.36824e+06	2.73158e+06	3.19442e+06	1.28679	0.022481	0.0637161	0.0692911	-3.85119	down
Zmhn002545	4-O-(6'-O-Glucosylcaffeoyl)-3,4-dihydroxybenzyl alcohol	Phenolic acids	Phenolic acids	C22H24O11	3	-	16744.1	13721.8	10491.5	45294.1	30204.3	48954.2	1.2157	0.0307084	0.0771934	0.3291	-1.6034	down
Wahln04020	Benzyl Alcohol Beta-D-Rutinoside	Others	Alcohol compounds	C19H28O10	3	-	119824	144872	70868.8	53134.7	58325.9	54021.4	1.08517	0.120085	0.208244	2.02781	1.01992	up
Safn004006	Phenylacetylaspartic acid	Amino acids and derivatives	Amino acids and derivatives	C12H13NO5	1	-	3.24001e+06	3.23359e+06	3.45534e+06	1.17983e+06	1.05975e+06	1.16472e+06	1.29008	0.000117361	0.00417703	2.91658	1.54428	up
Lmtn002324	Benzyl-(2''-O-glucosyl)glucoside	Others	Others	C19H28O11	3	76819-28-8	132198	132785	138542	67009.3	67429.1	60391.3	1.2865	2.44565e-05	0.00266947	2.07117	1.05044	up
pma6460	4-p-Coumaroylquinic acid	Phenolic acids	Phenolic acids	C16H18O8	3	93451-44-6	49786.5	65408.2	31408.7	139851	136740	127398	1.19761	0.00666643	0.0320814	0.36289	-1.4624	down
Hmbn001505	6-O-Glucosyl-leucolactone	Terpenoids	Monoterpenoids	C16H26O9	1	-	135085	85531.9	113389	288534	243357	334253	1.22648	0.00874785	0.0377209	0.385624	-1.37473	down
Wafn005121	1-Octen-3-Ol-3-O-Beta-D-Xylopyranosyl(1→6)-Beta-D-Glucopyranoside	Others	Alcohol compounds	C19H34O10	3	-	23727.8	34179.2	60386.5	288730	223004	245345	1.24146	0.0019256	0.0158354	0.15625	-2.67807	down
mws0458	4-Hydroxy-3-methoxy-benzaldehyde	Others	Aldehyde compounds	C8H8O3	3	121-33-5	1.60162e+06	1.61434e+06	1.80597e+06	669188	1.03166e+06	629294	1.19921	0.00837784	0.0366272	2.1552	1.10782	up
Wafn004288	7-Hydroxy-3,7-Dimethyl-2-Octenyl 6-O-Alpha-L-Arabinofuranosyl-Beta-D-Glucopyranoside	Others	Others	C21H38O11	2	-	16138.2	16024.9	14765.9	104169	57917.7	30798.8	1.13591	0.15103	0.244356	0.2433	-2.03919	down
mws1359	Pterostilbene	Others	Stilbene	C16H16O3	3	537-42-8	612845	598762	682762	177002	169111	191185	1.28899	0.0020545	0.0163591	3.52573	1.81792	up
MA10039492	Dehydroascorbate	Others	Vitamin	C6H6O6	2	490-83-5	3.71823e+06	3.84758e+06	3.55126e+06	8.18353e+06	8.07062e+06	8.0623e+06	1.29136	3.94875e-05	0.00310745	0.457183	-1.12915	down
Hmjn008136	2,3-Dihydroxyoleana-11,13(18)-dien-28-oic acid (Camaldulenic acid)	Terpenoids	Triterpene	C30H46O4	2	71850-15-2	140523	140523	140523	7.92577e+06	8.21644e+06	8.45907e+06	1.29367	0.000365625	0.00690544	0.017136	-5.86682	down
Hmhn000927	Phloroglucinol-1-O-β-D-glucopyranoside	Others	Others	C12H16O8	1	-	567386	577078	554064	187700	204943	146027	1.27406	0.000631142	0.00941065	3.15319	1.65681	up
Wbwn008071	4-[3-(hydroxymethyl)-7-methoxy-5-(prop-2-en-1-yl)-2,3-dihydro-1-benzofuran-2-yl]-2-methoxyphenol	Lignans and Coumarins	Lignans	C20H22O5	3	-	1958.3	1958.3	1958.3	9791.49	34876.8	16586.8	1.22713	0.132664	0.223713	0.0959087	-3.3822	down
Wahln11151	Icosanedioic Acid 1-(2,3-Dihydroxypropyl) Ester	Lipids	Glycerol ester	C23H44O6	3	-	79489.2	90769.4	107518	41945.3	27972	36121.4	1.23796	0.00865766	0.0375033	2.61958	1.38934	up
Qmxn082005	Excisusin A	Terpenoids	Ditepenoids	C22H32O5	3	-	331043	359440	379301	2.5985e+06	2.204e+06	2.40839e+06	1.29101	0.00273511	0.0192272	0.148357	-2.75286	down
Waln010192	2-(2,3-dihydroxypropoxy)-3-(((2-(dimethylamino)ethoxy)(hydroxy)phosphoryl)oxy)propyl (8E,11Z,14Z)-octadeca-8,11,14-trienoate	Lipids	LPE	C28H52NO9P	1	-	25750.1	31470	30546.1	120990	139490	115117	1.28492	0.0039852	0.0234234	0.233672	-2.09745	down
Lmmn005168	Siegesbeckic acid	Terpenoids	Ditepenoids	C20H32O4	3	-	8.16163e+06	8.16163e+06	8.16163e+06	8.4139e+07	6.755e+07	7.53239e+07	1.29164	0.00500077	0.0269851	0.107857	-3.21281	down
Zbln007359	2,7-dihydroxy-4-methoxyphenanthrene	Quinones	PhenAnthraquinones	C15H12O3	3	130827-45-1	17139.5	15724.3	24927.6	43812.9	29924.8	41987.8	1.14305	0.0268284	0.0711821	0.499383	-1.00178	down
mws0724	8-Hydroxyguanosine	Nucleotides and derivatives	Nucleotides and derivatives	C10H13N5O6	3	3868-31-3	5898.18	5898.18	5898.18	47195.8	43962.1	50985.2	1.29264	0.00238497	0.0176875	0.124484	-3.00597	down
Rfn049443	3-(2-Glucosyloxy-4-methoxyphenyl)propanoic acid*	Phenolic acids	Phenolic acids	C16H22O9	1	477873-63-5	244702	295238	300957	36224.8	36224.8	36224.8	1.29107	0.00532081	0.0280002	7.73776	2.95192	up
Wafn002827	Dihydroferulic acid glucoside*	Phenolic acids	Phenolic acids	C16H22O9	1	-	244702	295238	300957	36224.8	36224.8	36224.8	1.29107	0.00532081	0.0280002	7.73776	2.95192	up
Zajn005914	Kaempferol-3-O-[2-O-(trans-p-coumaroyl)-3-O-ɑ-D-glucopyranosyl]-ɑ-D-glucopyranoside	Flavonoids	Flavonols	C36H36O18	3	-	3221.08	3221.08	3221.08	21927.8	21370.1	19383.8	1.29268	0.00190286	0.0157166	0.154164	-2.69747	down
MWSN0171	Apigenin 7-O-neohesperidoside	Flavonoids	Flavones	C27H30O14	3	17306-46-6	14583.8	61804.1	28745.8	2916.77	2916.77	2916.77	1.21741	0.148513	0.2425	12.0149	3.58675	up
pme1611	Isohemiphloin	Flavonoids	Flavanones	C21H22O10	3	3682-02-8	279039	272737	298987	62698.1	55612.3	77187.9	1.28212	3.94183e-05	0.00310745	4.35177	2.1216	up
Zmcn003728	Kaempferol-3,7-O-diglucoside	Flavonoids	Flavonols	C27H30O16	3	25615-14-9	3204.33	3204.33	3204.33	35243.6	21712	40298.2	1.27657	0.0342286	0.0838114	0.0988443	-3.3387	down
pme1974	Pyruvate	Organic acids	Organic acids	C3H4O3	3	127-17-3	126540	147147	117203	67081.3	44422.5	58754	1.22862	0.0034568	0.0216748	2.29588	1.19904	up
Lman003972	6-O-Caffeoylarbutin*	Phenolic acids	Phenolic acids	C21H22O10	3	136172-60-6	25797.1	21190.2	40578.5	71532.8	41536.9	65697.2	1.05694	0.0593039	0.12566	0.489832	-1.02964	down
Wahln02843	2,6-Dimethoxy-4-(2-Hydroxyethyl)Phenyl Beta-D-Glucopyranoside	Others	Alcohol compounds	C16H24O9	3	-	91702.6	72890	70203.8	2985.29	2985.29	2985.29	1.29201	0.0079748	0.0355789	26.217	4.71243	up
Zbqn008252	Rubianol-g	Terpenoids	Triterpene	C30H46O4	3	-	2.12083e+06	2.20926e+06	609306	7.57778e+06	7.67361e+06	6.93428e+06	1.15079	0.00288546	0.0196824	0.222639	-2.16722	down
Hmhn007438	5,7-Dihydroxy-3-(4-Hydroxybenzyl)-4-Chromanone	Flavonoids	Other Flavonoids	C16H14O5	1	96911-00-1	22329.5	5436.42	20269.6	49857.8	61157.3	46450.3	1.06727	0.00681176	0.0325425	0.305054	-1.71286	down
Ymln008632	Deoxyerythrolaccin	Quinones	Anthraquinone	C15H10O5	3	18499-83-7	117154	131836	121022	23430.8	23430.8	23430.8	1.29258	0.00192842	0.0158354	5.2639	2.39613	up
Lmmn006306	Machilusolide D	Others	Lactones	C18H30O3	3	-	314670	328422	292543	655719	680200	884184	1.25981	0.0254369	0.0691582	0.421437	-1.24661	down
Lamn006527	Drimiopsin C	Flavonoids	Other Flavonoids	C15H12O6	3	773850-90-1	2.54899e+06	1.20769e+06	3.98305e+06	134290	134290	134290	1.25656	0.0926765	0.17296	19.2115	4.2639	up
Zbqn003921	N-carboxy-N-(2-oxo-2-phenylethyl)-L-alanine	Amino acids and derivatives	Amino acids and derivatives	C12H13NO5	2	-	3.53654e+06	3.5384e+06	3.49429e+06	1.19699e+06	1.07972e+06	1.34169e+06	1.28496	0.000745981	0.0100636	2.92096	1.54644	up
Safn011471	2-hydroxy-3-{[3,4,5-trihydroxy-6-(hydroxymethyl)oxan-2-yl]oxy}propyl octadeca-9,12,15-trienoate	Lipids	Free fatty acids	C27H46O9	1	-	3229.04	12360.4	4252.32	51712.2	37858.3	34758.6	1.18955	0.00891939	0.0381126	0.159591	-2.64755	down
MWSmce052	3-Hydroxyurs-12-en-28-oic acid (3-Epiursolic acid)*	Terpenoids	Triterpene	C30H48O3	3	989-30-0	505466	469296	454056	2.44732e+06	2.18139e+06	2.05522e+06	1.28981	0.00381318	0.0229092	0.213769	-2.22588	down
Wasn004983	5-Galloyl-6-O-Benzoyl Glucose	Phenolic acids	Phenolic acids	C20H20O11	3	-	60698.3	92550.9	95778.1	7516.03	7516.03	7516.03	1.28409	0.0212879	0.0616652	11.0443	3.46523	up
pmb3317	Quinacyl syringic acid	Phenolic acids	Phenolic acids	C16H20O10	3	-	91203.4	91203.4	91203.4	955003	1.02355e+06	920157	1.29327	0.00120257	0.0124794	0.0943902	-3.40522	down
Lmhn002573	Sinapoylglucuronic acid	Phenolic acids	Phenolic acids	C17H20O11	3	-	1661.28	1661.28	1661.28	13962.8	20473.1	18007.4	1.28778	0.0140859	0.0499192	0.0950327	-3.39543	down
Lmmn001643	trans-2-Hydroxycinnamate*	Phenolic acids	Phenolic acids	C9H8O3	3	583-17-5	1.45567e+06	1.29156e+06	1.42082e+06	456339	691302	753406	1.20351	0.00464581	0.0254576	2.1925	1.13258	up
Lmtn003441	2-Acetyl-3-hydroxyphenyl-1-O-glucoside	Others	Others	C15H20O7	3	-	194156	199369	210474	27518.9	27518.9	27518.9	1.29337	0.000765469	0.0102114	7.31617	2.87109	up
Jmwn002057	2-(3-β-D-glucopyranosyloxy-4-hydroxyphenyl)ethanol-1-O-β-D-glucopyranoside	Others	Alcohol compounds	C20H30O13	2	-	260563	198089	9148.07	1829.61	1829.61	1829.61	1.12265	0.178291	0.276614	85.2275	6.41325	up
Walbn05525	2-Decenedioic acid	Lipids	Free fatty acids	C10H16O4	3	37443-67-7	7808.12	7808.12	7808.12	68119.4	39040.6	64489.1	1.27319	0.032614	0.0805541	0.136466	-2.87338	down
Lmmn008971	3-Hydroxycycloarta-24-ene-26-oic acid (Isomangiferolic acid)*	Terpenoids	Triterpene	C30H48O3	3	13878-92-7	455466	529751	458613	2.3205e+06	1.98205e+06	2.05924e+06	1.28824	0.00258098	0.0184644	0.226953	-2.13953	down
Lmxn007456	Acerosin	Flavonoids	Flavones	C18H16O8	1	15835-74-2	1448.99	1448.99	1448.99	14112.7	35320.5	30253.5	1.26858	0.0591382	0.125497	0.0545506	-4.19626	down
Hmfn000531	Ascorbate	Others	Vitamin	C6H8O6	1	50-81-7	2.05549e+07	2.78466e+07	2.66163e+07	9.27234e+06	1.12441e+07	1.12561e+07	1.24981	0.0172372	0.055054	2.36109	1.23945	up
Lmsn000954	Dambonitol	Others	Saccharides	C8H16O6	1	523-94-4	44219.3	44219.3	44219.3	574532	529861	520344	1.29335	0.00112605	0.0122333	0.0816488	-3.61442	down
WaYn005157	Gentisic acid 2-O-(6''-O-Feruloyl)Glucoside*	Phenolic acids	Phenolic acids	C23H24O12	3	-	5587.52	5587.52	5587.52	27937.6	39689.8	35689.9	1.28523	0.0139971	0.0498164	0.162243	-2.62377	down
mws0668	Xanthosine	Nucleotides and derivatives	Nucleotides and derivatives	C10H12N4O6	3	146-80-5	1.15433e+06	1.07764e+06	5875.25	1175.05	1175.05	1175.05	1.06727	0.182269	0.281549	634.822	9.31021	up
MWSmce230	Methyl gallate*	Phenolic acids	Phenolic acids	C8H8O5	3	99-24-1	23003.5	41507	30073.1	4600.71	4600.71	4600.71	1.27335	0.0378205	0.090342	6.85283	2.7767	up
Lmsn003582	1-O-Galloyl-4-O-p-Coumaroyl-β-D-glucose	Phenolic acids	Phenolic acids	C22H22O12	3	-	12718.8	17049.3	33574.3	2459.51	2459.51	2459.51	1.24638	0.0990815	0.181212	8.58469	3.10177	up
MWSslk171	Nodakenin	Lignans and Coumarins	Coumarins	C20H24O9	2	495-31-8	2756.83	2756.83	2756.83	48923.6	13784.2	24357.3	1.22871	0.127658	0.217514	0.0949921	-3.39605	down
Zapn004520	gnetifolin E	Others	Stilbene	C21H24O9	2	140671-07-4	260785	247149	212675	26464.8	26464.8	26464.8	1.29173	0.00445621	0.0249495	9.07633	3.18211	up
mws0336	Urocanate	Alkaloids	Alkaloids	C6H6N2O2	2	104-98-3	1.05515e+07	1.04857e+07	9.96396e+06	2.49826e+07	2.57053e+07	2.47614e+07	1.29224	7.68757e-06	0.00136118	0.410887	-1.28318	down
Lcsn006884	2,2'-(3-methylcyclohexane-1,1-diyl)diacetic acid	Organic acids	Organic acids	C11H18O4	3	5345-12-0	461329	403714	438089	1.0711e+06	996648	1.06474e+06	1.28699	7.01295e-05	0.00346027	0.416006	-1.26532	down
Ylgn010606	triptonoterpene	Terpenoids	Ditepenoids	C20H28O2	2	-	1.32924e+06	1.01839e+06	1.04176e+06	66968.1	66968.1	66968.1	1.29133	0.00872819	0.0376935	16.8706	4.07644	up
Zbln010189	orchinol	Quinones	PhenAnthraquinones	C16H16O3	3	41060-20-2	211870	207554	213517	48178.7	50159.9	67579.7	1.27776	0.000744067	0.0100636	3.81478	1.9316	up
Wayn007583	Quercetin 5-O-p-coumaroyl acetylrhamnoside	Flavonoids	Flavonols	C32H28O14	3	-	2407.24	2407.24	2407.24	12630.9	14309	12036.2	1.29129	0.00410774	0.0237494	0.185286	-2.43218	down
pmn001477	4-C-Glucose-1,3,6-trihydroxy-7-methoxyxanthone	Flavonoids	Other Flavonoids	C20H20O11	3	-	839504	699372	1.01029e+06	64965.7	64965.7	64965.7	1.28929	0.0128709	0.0473549	13.0796	3.70924	up
Hmbn004734	3,23-Dihydroxy-30-noroleana-12,20(29)-dien-28-oic acid (30-Norhederagenin)	Terpenoids	Triterpene	C29H44O4	2	117654-06-5	617488	617488	617488	4.76466e+06	4.25687e+06	4.49033e+06	1.29304	0.0014226	0.0138022	0.137099	-2.86671	down
Lmtn002233	Androsin	Others	Ketone compounds	C15H20O8	1	531-28-2	42907.1	42907.1	42907.1	214536	229714	226660	1.29331	0.000657122	0.00946113	0.191861	-2.38187	down
Zbqn002456	N-(3,4,5-trihydroxycinnamicacid)-alanine	Amino acids and derivatives	Amino acids and derivatives	C12H13NO6	3	-	156985	163957	171815	19823.4	16976.6	15409.5	1.29064	0.000339399	0.00670296	9.43807	3.23849	up
Zahn007990	5-hydroxy-3,4-dimethyl-5-pentylfuran-2(5H)-one*	Others	Lactones	C11H18O3	3	-	1369.47	1369.47	1369.47	8565.91	6847.34	11463.9	1.27735	0.0300898	0.0763838	0.152858	-2.70973	down
HJN072	Litchioside C	Organic acids	Organic acids	C19H34O9	2	-	3040.97	3040.97	3040.97	35584.4	15204.8	23426	1.25777	0.0670345	0.137416	0.122925	-3.02415	down
Wbmn002185	6-Hydroxy-4-(4-hydroxy-3-methoxyphenyl)-7-methoxy-naphtho[2,3-c]furan-1,3-dione-1	Lignans and Coumarins	Lignans	C20H14O7	3	-	12080.2	10117	25997.1	2023.4	2023.4	2023.4	1.24186	0.106801	0.190893	7.93949	2.98905	up
Lmmn001894	Demethylwedelolactone-3-O-glucoside	Lignans and Coumarins	Coumarins	C21H18O12	3	-	4829.44	4829.44	4829.44	25708.8	24147.2	41285.5	1.27167	0.0429189	0.0994188	0.158965	-2.65322	down
mws0025	1,2,3-Trihydroxybenzene	Others	Others	C6H6O3	3	87-66-1	3911.92	3911.92	3911.92	33380.1	22462	29937.7	1.2846	0.0166251	0.0539506	0.136813	-2.86972	down
Zbjn003605	1,4-O-di-Caffeoyl-3-O-glucoside Quinic Acid	Phenolic acids	Phenolic acids	C31H34O17	3	-	4207.5	4207.5	4207.5	61767.8	49554.4	48836.9	1.29142	0.00720058	0.0337177	0.0788123	-3.66544	down
Lcrn000423	Myristargenol B	Lignans and Coumarins	Lignans	C20H26O5	3	-	19751.2	19751.2	19751.2	185961	170373	152314	1.29186	0.00418568	0.0238031	0.116492	-3.10169	down
Wasn001007	Isoascorbic acid 2-O-glucoside	Others	Vitamin	C12H18O11	1	-	6020.23	10353.4	6656.21	1204.05	1204.05	1204.05	1.27275	0.0409076	0.0961752	6.37567	2.67258	up
Lcsn004011	Gibberellin A3	Terpenoids	Ditepenoids	C19H22O6	3	77-06-5	296374	310599	283170	99105.3	96492.5	80264.6	1.28428	5.83773e-05	0.00343869	3.22677	1.69009	up
pmn001459	Sibiricose A6	Phenolic acids	Phenolic acids	C23H32O15	3	241125-75-7	1509.39	1509.39	1509.39	13892.1	18806.9	7546.93	1.25397	0.0674439	0.137657	0.112512	-3.15185	down
HJN037	3,5-Dihydroxy-4-methoxybenzoic acid; 4-O-Methylgallic Acid*	Phenolic acids	Phenolic acids	C8H8O5	3	4319-02-2	11346.3	54119.4	51583	2269.27	2269.27	2269.27	1.20577	0.117593	0.205136	17.1933	4.10378	up
WaYn004519	Salicortin	Phenolic acids	Phenolic acids	C20H24O10	2	29836-41-7	1407.82	1407.82	1407.82	26712.3	7039.12	28738.8	1.21637	0.106967	0.191071	0.0675862	-3.88713	down
MWSprf094	Tracheloside*	Lignans and Coumarins	Lignans	C27H34O12	2	33464-71-0	9150.63	9150.63	9150.63	83203	109121	70945.1	1.28567	0.0198858	0.058991	0.104273	-3.26156	down
Zmhn003297	3-O-Digalloyl quinic acid	Phenolic acids	Phenolic acids	C21H20O14	3	-	10748.2	6417.75	8608.01	1283.55	1283.55	1283.55	1.27761	0.0280389	0.0729881	6.6934	2.74274	up
Hmln000873	2-O-Galloyl-D-glucose	Phenolic acids	Phenolic acids	C13H16O10	1	-	1.26369e+06	1.25173e+06	12409.6	2481.91	2481.91	2481.91	1.08129	0.180297	0.279347	339.5	8.40727	up
MWSmce363	2,5-Dihydroxyacetophenone	Others	Ketone compounds	C8H8O3	3	490-78-8	98191.9	57865.7	97696.4	194788	257971	177170	1.17943	0.0193554	0.0580253	0.40283	-1.31176	down
MWStz724	5,7,3'-Trihydroxy-6,4',5'-trimethoxyflavone	Flavonoids	Flavones	C18H16O8	1	78417-26-2	6469.57	6616.06	10425.6	25592	28661.2	33703.8	1.25168	0.00365655	0.0224828	0.267304	-1.90345	down
Lmmn009932	3-Hydroxy-24-methylene-9,19-cyclolanostan-26-oic acid (Ambolic acid)*	Terpenoids	Triterpene	C31H50O3	2	13878-93-8	61348.1	68273.7	23166.6	4633.33	4633.33	4633.33	1.23923	0.0808021	0.156448	10.992	3.45838	up
MWSmce439	Dihydrocoumarin	Lignans and Coumarins	Coumarins	C9H8O2	3	119-84-6	90116.9	67119.5	77965.9	29725.5	42605.5	43529.1	1.19286	0.0107519	0.0423057	2.03005	1.02152	up
MWSHC20176	Betulinic acid*	Terpenoids	Triterpene	C30H48O3	3	472-15-1	600656	679842	319230	2.68424e+06	1.91366e+06	2.41813e+06	1.22671	0.00627657	0.0311957	0.22801	-2.13283	down
Zjbn102207	Dactylorhin E	Others	Others	C27H40O16	2	-	5037.75	5037.75	5037.75	25188.7	41534.8	101394	1.21585	0.158604	0.253636	0.0898969	-3.47558	down
Lakn002368	2-Hydroxy-5-methylbenzoyl-1-O-glucose	Phenolic acids	Phenolic acids	C14H18O8	1	-	7340.62	7340.62	7340.62	52589.8	49846.8	36703.1	1.28414	0.0154081	0.0522144	0.158272	-2.65953	down
Wahsn05750	12-Oxododecanoic acid glucoside	Lipids	Free fatty acids	C18H32O8	3	-	29767.7	26064.1	30691.3	89817.3	44363.1	69531.1	1.14854	0.0953997	0.176645	0.424734	-1.23537	down
mws1297	Benzyl glucoside	Others	Others	C13H18O6	3	4304-12-5	14364.2	29236.5	17329.6	2872.84	2872.84	2872.84	1.26287	0.0617042	0.129283	7.0697	2.82165	up
Lmmn002260	5'-Methoxyisolariciresinol-9'-O-glucoside*	Lignans and Coumarins	Lignans	C27H36O12	2	-	34822.7	95042.3	64001.2	6964.53	6964.53	6964.53	1.24851	0.0801524	0.155947	9.27873	3.21393	up
Wafn002807	methyl 4-O-galloylchlorogenate	Phenolic acids	Phenolic acids	C24H24O13	3	574747-58-3	4869.38	7318.35	8766.82	973.876	973.876	973.876	1.27353	0.0339886	0.0833677	7.17222	2.84242	up
Zmsn005057	Cornuside	Terpenoids	Monoterpenoids	C24H30O14	2	131189-57-6	13670.1	9643.68	4729.55	945.91	945.91	945.91	1.24446	0.0830487	0.15951	9.88232	3.30485	up
MWSslk030	Neohesperidin Dihydrochalcone (Nhdc)	Flavonoids	Chalcones	C28H36O15	1	20702-77-6	113060	116107	123040	217207	263796	238556	1.27483	0.00928614	0.0388501	0.489479	-1.03068	down
Wbkn003794	Yadanzioside E	Terpenoids	Ditepenoids	C32H44O16	3	95258-20-1	412.9	412.9	412.9	7975.45	2064.5	5416.15	1.2258	0.109423	0.193932	0.0801431	-3.64128	down
Zbjn004215	Kaempferol-3-O-sophoroside	Flavonoids	Flavonols	C27H30O16	3	19895-95-5	2830.76	2830.76	2830.76	47770.6	27220.4	44764.5	1.282	0.0285797	0.0734729	0.0709136	-3.81779	down
Zmdn004052	Aloe emodin-1-O-glucoside	Quinones	Anthraquinone	C21H20O10	2	266997-58-4	20486.8	20486.8	20486.8	106820	102434	143471	1.2842	0.0174864	0.0550816	0.174244	-2.52082	down
Lmdn001925	Olivil-4'-O-glucoside	Lignans and Coumarins	Lignans	C26H34O12	2	76880-93-8	116686	102816	66871.5	13374.3	13374.3	13374.3	1.27456	0.0311791	0.0780993	7.13741	2.8354	up
Zbnn005416	Eriodictyol-7-O-(6''-acetyl)glucoside	Flavonoids	Flavanones	C23H24O12	3	-	1233.78	1233.78	1233.78	16026.4	9498.23	6168.9	1.2501	0.0842802	0.161219	0.116785	-3.09807	down
MWSHC2047	(+)-Syringaresinol O-beta-D-glucoside	Lignans and Coumarins	Lignans	C28H36O13	3	7374-79-0	3059.21	3059.21	3059.21	33356.7	15296.1	55915.7	1.22957	0.113725	0.199989	0.0877668	-3.51018	down
MWS1839	Ethylparaben	Phenolic acids	Phenolic acids	C9H10O3	3	120-47-8	126553	124838	115049	883898	886899	949361	1.29282	0.000546637	0.00894985	0.134713	-2.89204	down
Lmmn006932	2-Hydroxy-4-methyl-3-tridecanoyloxypentanoic acid methyl ester	Lipids	Free fatty acids	C20H38O5	3	-	95286.3	95364.4	99681.9	332024	308131	316101	1.29245	0.000651346	0.00946113	0.303614	-1.71969	down
Sakn004920	Isolugrandoside	Phenolic acids	Phenolic acids	C29H36O16	3	-	117740	166948	140048	73238.2	80443.7	36790.8	1.09529	0.0164844	0.0539371	2.22991	1.15699	up
Lmqn012798	Urs-12(13)-en-3-one-28-oic acid*	Terpenoids	Triterpene	C30H46O3	1	-	1.16171e+06	804583	759555	4.45287e+06	4.20805e+06	3.8905e+06	1.27342	0.000135014	0.00444953	0.217175	-2.20307	down
Li512115	Isochlorogenic acid B	Phenolic acids	Phenolic acids	C25H24O12	3	14534-61-3	98933.5	94208	79470.6	5396.65	5396.65	5396.65	1.29228	0.00466904	0.0255355	16.8384	4.07368	up
Lmxn002084	Dihydrocatalpol	Terpenoids	Terpene	C15H24O10	3	6736-86-3	4137.12	4137.12	4137.12	42881	20685.6	57214.1	1.24707	0.0767063	0.150852	0.10276	-3.28266	down
Wahln02444	Hydroxytyrosol Glucoside*	Others	Alcohol compounds	C14H20O8	1	76873-99-9	32259.8	32259.8	32259.8	182976	212263	161299	1.28838	0.00915702	0.0385466	0.173895	-2.52371	down
Hmtn001120	5-(2-Hydroxyethyl)-2-O-glucosylphenol*	Phenolic acids	Phenolic acids	C14H20O8	3	-	32259.8	32259.8	32259.8	182976	212263	161299	1.28838	0.00915702	0.0385466	0.173895	-2.52371	down
pmn001553	Cimidahurinine*	Others	Alcohol compounds	C14H20O8	1	142542-89-0	32259.8	32259.8	32259.8	182976	212263	161299	1.28838	0.00915702	0.0385466	0.173895	-2.52371	down
Wahsn07168	Quercetin 3-O-(4'-O-p-coumaroyl,6'-O-acetyl)-glucoside*	Flavonoids	Flavonols	C32H28O15	1	-	2801.58	3272.66	2449.02	489.805	489.805	489.805	1.28785	0.0101397	0.0410368	5.80045	2.53616	up
Zbfn004208	3-O-(3-Methoxy-4-hydroxybenzoyl)-4-O-caffeoylquinic acid	Phenolic acids	Phenolic acids	C24H24O12	3	-	6851.17	6851.17	6851.17	43807.8	59001.1	40921.2	1.28504	0.0181477	0.0560048	0.143001	-2.80591	down
Lmdn003075	3,4-Dihydroverbenalin	Terpenoids	Monoterpenoids	C17H26O10	2	-	1989.26	1989.26	1989.26	16929.9	51150.1	29658.7	1.25888	0.0920809	0.172416	0.0610587	-4.03366	down
Lmsn004090	1-O-Galloyl-3-O-p-Coumaroyl-β-D-glucose	Phenolic acids	Phenolic acids	C22H22O12	3	-	17661	8781.74	10742.5	1507.63	1507.63	1507.63	1.26816	0.0560881	0.119923	8.22155	3.03941	up
WaYn004439	[(1R,2R)-cyclohex-4-ene-1,2-diol]2-O-(6''-O-Caffeoyl)glucoside	Phenolic acids	Phenolic acids	C21H26O10	3	-	6681.31	6681.31	6681.31	52152.7	33406.5	104697	1.23546	0.117097	0.20441	0.105352	-3.24671	down
Zbbn005427	10-O-(3-Methylferuloyl)-geniposide	Terpenoids	Monoterpenoids	C27H32O13	3	-	1739.05	3578.12	5062.29	347.81	347.81	347.81	1.24412	0.0836025	0.160177	9.94743	3.31432	up
Waptn02876	4-(2-hydroxyvinyl)benzene-1,2-diol Glucoside*	Others	Alcohol compounds	C14H18O8	2	-	73711.4	94685.9	99158	14742.3	14742.3	14742.3	1.28699	0.0109207	0.0424395	6.04962	2.59684	up
Wafn003834	Hydroxygeranyl 6-O-xylopyranosyl-glucopyranoside	Terpenoids	Monoterpenoids	C21H36O11	3	-	14251	14251	14251	150219	117438	71255.1	1.26437	0.0498394	0.11116	0.126148	-2.98681	down
pmn001703	19-Hydroxy-2-(hydroxymethyl)-A(1)-norursa-2,12-dien-28-oic acid (Hyptadienic acid)	Terpenoids	Triterpene	C30H46O4	1	128397-09-1	9312.45	8096.2	11273	86866.8	75608.9	84371.7	1.28769	0.00119281	0.0124794	0.116192	-3.10542	down
Wasyqn5954	1-Octanol Rhamnosylglucoside	Others	Alcohol compounds	C20H38O10	2	-	4267.3	4267.3	4267.3	38137.1	21767.1	26756.9	1.27467	0.0366015	0.0882129	0.147724	-2.75903	down
MWS2687	16-HETE; 16-Hydroxy-5,8,11,14-eicosatetraenoic acid	Lipids	Free fatty acids	C20H32O3	3	128914-46-5	12701.4	9235.55	14015.5	1121.82	1121.82	1121.82	1.28636	0.0167943	0.0540962	10.6828	3.41721	up
Labn002264	Grevilloside G*	Phenolic acids	Phenolic acids	C14H20O8	3	791846-69-0	22250.1	22250.1	22250.1	422790	305658	500955	1.2873	0.0207768	0.0606582	0.0542949	-4.20304	down
Safn004850	3'-O-β-Glucopyranosyl plumbagic acid methyl ester	Phenolic acids	Phenolic acids	C18H24O10	3	-	50557.3	65689.2	114223	10111.5	10111.5	10111.5	1.2569	0.0738041	0.146831	7.59762	2.92555	up
MWStz681	Neoliquiritin	Flavonoids	Flavanones	C21H22O9	2	5088-75-5	103342	176320	127384	354382	277627	321567	1.20418	0.00416054	0.0237637	0.426863	-1.22815	down
Zbfn002396	6-O-Dihydrocaffeoylglucose	Phenolic acids	Phenolic acids	C15H20O9	1	-	2980.01	2980.01	2980.01	35818.8	36069.4	36620.4	1.29371	5.08815e-05	0.00343869	0.08239	-3.60139	down
Lmln001195	Picein	Phenolic acids	Phenolic acids	C14H18O7	1	530-14-3	3043.81	3043.81	3043.81	109047	65373	72297.1	1.28786	0.0280565	0.0729881	0.0370118	-4.75587	down
mws0748	1-Caffeoylquinic acid	Phenolic acids	Phenolic acids	C16H18O9	2	1241-87-8	372749	447338	382739	121881	155456	98979.5	1.25748	0.00108499	0.0121836	3.19632	1.67641	up
MWStz518	Regaloside A*	Phenolic acids	Phenolic acids	C18H24O10	3	114420-66-5	2371.95	2371.95	2371.95	11859.7	23739.3	20404.6	1.26647	0.0440356	0.101261	0.12706	-2.97642	down
Lmjn003127	Euphorbioside A	Terpenoids	Sesquiterpenoids	C19H32O9	3	403805-90-3	466475	433165	457427	3658.07	3658.07	3658.07	1.29367	0.000490847	0.0085311	123.66	6.95023	up
Lazn001573	Erythro-Guaiacylglycerol	Phenolic acids	Phenolic acids	C10H14O5	1	-	60694.1	54295.7	23737.7	4747.54	4747.54	4747.54	1.24913	0.0679145	0.13839	9.74031	3.28397	up
HJN051	Tamarixetin-3-O-rutinoside	Flavonoids	Flavonols	C28H32O16	3	-	3638.98	3638.98	3638.98	40175.2	21244.5	21796.8	1.2662	0.0606223	0.127518	0.131187	-2.9303	down
Lmhn003240	Benzoylmalic acid	Phenolic acids	Phenolic acids	C11H10O6	3	22138-51-8	92827.2	107971	105255	9516.51	9516.51	9516.51	1.29275	0.00253005	0.0182882	10.7201	3.42224	up
Lmgn002184	2-Oxoheptanedionic acid	Organic acids	Organic acids	C7H10O5	3	17126-90-8	58812.6	37909.5	41663.8	131614	94929.8	136428	1.21598	0.0154492	0.0522911	0.381257	-1.39116	down
mws0028	Vanillate	Phenolic acids	Phenolic acids	C8H8O4	3	121-34-6	255145	238222	235792	30688.7	30688.7	30688.7	1.29334	0.000820412	0.0106673	7.91994	2.98549	up
Lmmn009550	3-Oxo-9,19-cyclolanost-24-en-26-oic acid (Mangiferonic acid)*	Terpenoids	Triterpene	C30H46O3	1	13878-90-5	849799	1.048e+06	777320	5.39982e+06	4.24093e+06	4.04729e+06	1.27862	0.0108033	0.0423902	0.195435	-2.35524	down
Zmcn009787	23-Hydroxy-3-oxoolean-12-en-28-oic acid (Hederagonic acid)	Terpenoids	Triterpene	C30H46O4	1	466-01-3	1014.35	1014.35	1014.35	72589.1	65312.5	68007.4	1.29359	0.000985115	0.0117155	0.0147786	-6.08035	down
Zbqn004207	(2-phenylacetyl)-L-glutamicacid	Amino acids and derivatives	Amino acids and derivatives	C13H15NO5	3	-	88719.8	92895.8	97199.9	411048	390022	446769	1.29112	0.00218979	0.0169499	0.223439	-2.16205	down
mws0930	Docosapentaenoic acid	Lipids	Free fatty acids	C22H34O2	2	24880-45-3	28365.9	31967.1	38187.1	107293	42555.8	64861.1	1.01755	0.175624	0.273977	0.458852	-1.1239	down
pmn001338	Rhein-8-O-glucoside	Quinones	Anthraquinone	C21H18O11	2	34298-86-7	6838.9	6838.9	6838.9	39215.5	45250.4	34194.5	1.28821	0.00940963	0.038916	0.172903	-2.53197	down
Lmhn002895	Feruloylcaffeoyltartaric acid	Phenolic acids	Phenolic acids	C23H20O12	3	-	17807.9	21834.3	8513.48	1702.7	1702.7	1702.7	1.25093	0.0679495	0.13839	9.42734	3.23685	up
Hmln002996	β-Hydroxyacteoside	Phenolic acids	Phenolic acids	C29H36O16	3	95587-86-3	12152.8	12152.8	12152.8	86163.6	79786.7	90260.8	1.29285	0.00172625	0.0149698	0.142298	-2.81301	down
Zmyn002321	4-Cresol	Others	Others	C7H8O	3	106-44-5	11938.7	5999.03	9627.62	56798.8	51269.4	65430.3	1.26101	0.00269681	0.0190052	0.158879	-2.654	down
Lmzn006284	2-Hydroxyursolic acid	Terpenoids	Triterpene	C30H48O4	2	-	2.71094e+06	2.91788e+06	3.06724e+06	198546	198546	198546	1.29328	0.00146046	0.0141093	14.5996	3.86786	up
MWSmce134	3-Oxolup-20(29)-en-28-oic acid (Betulonic acid)*	Terpenoids	Triterpene	C30H46O3	1	4481-62-3	774632	814529	697857	4.50219e+06	3.75178e+06	3.98836e+06	1.28921	0.00373076	0.0226322	0.186812	-2.42034	down
MWSslk186	8-O-Acetylharpagide	Terpenoids	Monoterpenoids	C17H26O11	3	6926-14-3	2681.67	2681.67	2681.67	50907	15987	45524.6	1.24169	0.0850998	0.162568	0.0715629	-3.80464	down
Walbn03514	tetrahydrodehydrodiconiferyl alcohol glucoside	Lignans and Coumarins	Lignans	C26H36O11	2	-	711386	686479	792536	94666.9	94666.9	94666.9	1.29257	0.00252915	0.0182882	7.71266	2.94723	up
MWS2684	12-HEPE; 12-Hydroxy-5,8,10,14,17-eicosapentaenoic acid	Lipids	Free fatty acids	C20H30O3	1	81187-21-5	20637.5	28021.1	15702.8	3140.57	3140.57	3140.57	1.27402	0.0361426	0.0873653	6.83119	2.77214	up
MWStz690	Rapanone	Quinones	Quinones	C19H30O4	1	573-40-0	1128.52	1128.52	1128.52	6983.45	11720	9353.87	1.28062	0.0265476	0.0706854	0.120666	-3.05091	down
Labn004065	4-Hydroxybenzoyl acetyl glucoside	Phenolic acids	Phenolic acids	C15H18O9	3	-	5451.62	5451.62	5451.62	60583.7	60021.7	70201.4	1.29263	0.00321188	0.0206801	0.0857142	-3.54432	down
MWS2058	3-Methylsalicylic Acid	Phenolic acids	Phenolic acids	C8H8O3	3	83-40-9	1843.63	1843.63	1843.63	23979	25405.4	21125	1.29253	0.00335825	0.0213317	0.0784421	-3.67223	down
Lajn004573	7,2',4'-Trihydroxy-8,3'-dimethoxyisoflavanglucoside	Flavonoids	Other Flavonoids	C23H28O11	2	-	862430	791418	739799	1.96143e+06	1.61816e+06	1.64898e+06	1.27012	0.00808229	0.0358327	0.457802	-1.12721	down
Lmhn002379	Strictinin	Tannins	Tannin	C27H22O18	3	517-46-4	42659.7	73064.8	40281.8	1191.4	1191.4	1191.4	1.28715	0.0405366	0.0955408	43.6481	5.44785	up
Ylyn012389	celastolide	Terpenoids	Triterpene	C30H46O5	2	-	4.25722e+06	1.43704e+06	1.44005e+06	1.31219e+07	1.08416e+07	1.25944e+07	1.19577	0.00157922	0.0143395	0.195151	-2.35734	down

## Sheet: P-LSH VS P-DL
Differential metabolite list for the P-LSH vs. P-DL comparison.
Index	Compounds	Class I	Class II	Formula	Level	CAS	P-DL-1	P-DL-2	P-DL-3	P-LSH-1	P-LSH-2	P-LSH-3	VIP	P-value	FDR	Fold_Change	Log2FC	Type
zjbp110810	6,8-dihydroxy-2-[2-(3'-hydroxy-4'-methoxyphenyl)ethyl]chromone	Others	Chromone	C18H16O6	1	-	703676	693170	692882	223910	205931	190820	1.27885	7.93498e-05	0.00218912	3.36694	1.75144	up
MWSmce157	Stachydrine	Alkaloids	Pyrrole alkaloids	C7H13NO2	3	471-87-4	1.00635e+06	1.25026e+06	1.1149e+06	2.5561e+06	2.51162e+06	2.43577e+06	1.26642	0.000464852	0.0061995	0.449326	-1.15416	down
Zjhp090604	5,7-dihydroxy-3-(4'-hydroxybenzyl)-chroman-4-one	Flavonoids	Other Flavonoids	C16H14O5	1	-	2.26988e+06	2.31868e+06	2.14799e+06	4.86007e+06	6.18415e+06	4.81445e+06	1.25776	0.0200382	0.056614	0.424786	-1.23519	down
mws0120	sn-Glycero-3-phosphocholine	Lipids	PC	C8H20NO6P	1	28319-77-9	6.6754e+06	7.04221e+06	6.45923e+06	3.42745e+07	3.67706e+07	3.52627e+07	1.28159	0.000351591	0.00531923	0.189796	-2.39747	down
pmb0962	L-Lysine-Butanoic Acid	Amino acids and derivatives	Amino acids and derivatives	C10H22N2O4	3	80407-71-2	294406	528084	426668	2.57874e+06	3.00211e+06	2.5619e+06	1.26053	0.00095538	0.0089097	0.153408	-2.70456	down
Lcsp000435	Glu-Ser	Amino acids and derivatives	Amino acids and derivatives	C8H14N2O6	3	5875-38-7	294406	528084	426668	2.57874e+06	3.00211e+06	2.5619e+06	1.26053	0.00095538	0.0089097	0.153408	-2.70456	down
MWS5209	N-Methyl-α-aminoisobutyric acid	Amino acids and derivatives	Amino acids and derivatives	C5H11NO2	3	2566-34-9	294406	528084	426668	2.57874e+06	3.00211e+06	2.5619e+06	1.26053	0.00095538	0.0089097	0.153408	-2.70456	down
Lmqp000329	Aminoimidazole ribotide	Nucleotides and derivatives	Nucleotides and derivatives	C8H14N3O7P	1	25635-88-5	5.43322e+06	5.69253e+06	5.15576e+06	1.7029e+07	1.28548e+07	1.31546e+07	1.25845	0.02081	0.0577507	0.378302	-1.40239	down
pme3009	trans-Aconitic acid	Organic acids	Organic acids	C6H6O6	3	4023-65-8	591096	541044	493180	210118	239666	287086	1.24067	0.00148734	0.0111499	2.20571	1.14124	up
Wbsp001110	hupcrispatine	Alkaloids	Alkaloids	C10H10N2O	1	-	8.68296e+08	8.395e+08	8.83233e+08	2.01347e+08	2.00952e+08	2.14245e+08	1.28174	9.99838e-05	0.00246802	4.2025	2.07125	up
Ladp002935	3-quinolinecarboxylic acid	Alkaloids	Quinoline alkaloids	C10H7NO3	1	-	5.53571e+06	5.37201e+06	5.84611e+06	6.56026e+07	6.72186e+07	6.36462e+07	1.28224	0.000236671	0.00402462	0.0852753	-3.55173	down
Zmdp000972	S-Methyl-L-cysteine	Amino acids and derivatives	Amino acids and derivatives	C4H9NO2S	2	1187-84-4	1.58805e+07	1.66154e+07	1.4923e+07	6.78813e+06	6.146e+06	6.49211e+06	1.27694	0.000937187	0.0089097	2.44097	1.28746	up
Waptp01054	4-(2-aminoethenyl)phenol*	Alkaloids	Alkaloids	C8H9NO	1	-	1.58805e+07	1.66154e+07	1.4923e+07	6.78813e+06	6.146e+06	6.49211e+06	1.27694	0.000937187	0.0089097	2.44097	1.28746	up
Zahp008363	5-hydroxyl-3',4',7,8-tetramethoxyflavone*	Flavonoids	Flavones	C19H18O7	1	13003-74-2	100486	99548.7	85121.4	202150	212269	223096	1.2681	0.000145934	0.00299231	0.447294	-1.1607	down
Zmjp010694	5-Hydroxy-3,7,3',4'-tetramethoxyflavone (Retusin)*	Flavonoids	Flavonols	C19H18O7	1	1245-15-4	100486	99548.7	85121.4	202150	212269	223096	1.2681	0.000145934	0.00299231	0.447294	-1.1607	down
Zmjp008503	5-Hydroxy-4',6,7-trimethoxyflavone (Salvigenin)	Flavonoids	Flavones	C18H16O6	1	19103-54-9	377378	402957	355171	112236	140551	112824	1.26919	0.000237571	0.00402462	3.10577	1.63495	up
pmp000163	Andrographidine E aglycone	Flavonoids	Flavones	C18H16O6	2	1165-40-8	4.48397e+07	4.28534e+07	3.98017e+07	1.39835e+07	1.6348e+07	1.51676e+07	1.27479	0.000628129	0.0074267	2.80213	1.48653	up
Lmsp011263	6-Hydroxy-5,7,4'-trimethoxyflavone	Flavonoids	Flavones	C18H16O6	1	6938-19-8	1.05795e+06	903195	994037	458044	417015	392251	1.26793	0.00223294	0.0142405	2.33185	1.22148	up
Lmbp007051	6-Hydroxy-2-[2-(3'-methoxy-4'-hydroxyphenylethyl)]chromone*	Others	Chromone	C18H16O5	3	-	7.99267e+06	8.96603e+06	9.15536e+06	1.13505e+06	2.12076e+06	1.71576e+06	1.25167	0.000146744	0.00299231	5.25268	2.39305	up
Zbjp006709	1,7-bis(4-hydroxy-3-methoxyphenyl)hept-1-ene-3-ol	Others	Ketone compounds	C21H26O5	3	-	1.40052e+08	1.66304e+08	1.85597e+08	2.49381e+07	4.26791e+07	3.14658e+07	1.25319	0.00465904	0.0224495	4.96506	2.31181	up
mws0040	Chrysin	Flavonoids	Flavones	C15H10O4	1	480-40-0	1.6127e+08	1.72824e+08	1.73958e+08	3.01256e+07	3.73209e+07	3.8767e+07	1.27557	3.50122e-05	0.00144102	4.78331	2.25801	up
mws0051	Acacetin*	Flavonoids	Flavones	C16H12O5	1	480-44-4	9.42487e+06	9.10849e+06	1.00783e+07	1.91791e+06	1.99109e+06	2.27147e+06	1.27874	0.000419317	0.00593036	4.62935	2.21081	up
MWS20189	Tectorigenin*	Flavonoids	Isoflavones	C16H12O6	3	548-77-6	1.19543e+07	1.29002e+07	1.26855e+07	2.1847e+06	2.81485e+06	2.96345e+06	1.27271	1.60117e-05	0.00107278	4.7143	2.23704	up
Lmjp004941	3,5,4'-Trihydroxy-7-methoxyflavone (Rhamnocitrin)*	Flavonoids	Flavonols	C16H12O6	3	569-92-6	1.19543e+07	1.29002e+07	1.26855e+07	2.1847e+06	2.81485e+06	2.96345e+06	1.27271	1.60117e-05	0.00107278	4.7143	2.23704	up
MWSHY0069	Hispidulin (5,7,4'-Trihydroxy-6-methoxyflavone)*	Flavonoids	Flavones	C16H12O6	3	1447-88-7	1.19543e+07	1.29002e+07	1.26855e+07	2.1847e+06	2.81485e+06	2.96345e+06	1.27271	1.60117e-05	0.00107278	4.7143	2.23704	up
Zmjp004795	5,6,7-Trihydroxy-8-methoxyflavone*	Flavonoids	Flavones	C16H12O6	3	-	1.19543e+07	1.29002e+07	1.26855e+07	2.1847e+06	2.81485e+06	2.96345e+06	1.27271	1.60117e-05	0.00107278	4.7143	2.23704	up
Cmxp005429	Okanin	Flavonoids	Chalcones	C15H12O6	3	484-76-4	793858	670759	753315	281671	176602	415681	1.14253	0.0103306	0.0374135	2.53782	1.34359	up
pma0253	O-MethylChrysoeriol-5-O-glucoside	Flavonoids	Flavones	C23H24O11	3	-	7.00738e+06	6.66999e+06	6.90515e+06	1.97569e+06	2.31444e+06	2.03205e+06	1.27776	5.24517e-06	0.000702853	3.25561	1.70293	up
Wbtp006612	2,3,6,8-tetrahydroxy-1-(3-methylbut-2-en-1-yl)xanthen-9-one	Flavonoids	Other Flavonoids	C18H16O6	3	-	916311	1.04537e+06	1.03447e+06	388605	370288	462922	1.2629	0.000573165	0.0069822	2.45222	1.29409	up
Lmsp009300	5,6-Dihydroxy-7,4'-dimethoxyflavone (Ladanein)	Flavonoids	Flavones	C17H14O6	1	10176-71-3	5.05183e+06	4.65038e+06	4.96856e+06	865670	1.16476e+06	800148	1.26982	1.97356e-05	0.00118162	5.18296	2.37378	up
Zbsp005521	Chrysin-5-O-glucoside (Toringin)*	Flavonoids	Flavones	C21H20O9	1	1329-10-8	1.48088e+06	1.35519e+06	1.22329e+06	734597	724539	466995	1.18423	0.0037718	0.0197651	2.10752	1.07554	up
pmb0854	LysoPC 18:3	Lipids	LPC	C26H48NO7P	2	-	9.86255e+06	1.45073e+07	1.54422e+07	2.50355e+07	3.39658e+07	3.28234e+07	1.18991	0.0102794	0.0373967	0.433566	-1.20568	down
Layp007667	Bauhinoxepin I	Others	Alcohol compounds	C16H14O5	3	-	2.20928e+06	2.33315e+06	2.25277e+06	4.86783e+06	5.9639e+06	5.09833e+06	1.26855	0.0110806	0.0392206	0.426565	-1.22916	down
pmd0160	LysoPE 16:0(2n isomer)	Lipids	LPE	C21H44NO7P	3	-	1.29418e+06	1.02239e+06	2.15594e+06	2.66396e+06	3.54422e+06	3.24553e+06	1.10234	0.0204752	0.0572737	0.473095	-1.0798	down
MWStz583	5-Hydroxy-7,3',4'-trimethoxyflavone	Flavonoids	Flavones	C18H16O6	1	29080-58-8	759620	785246	703944	249659	267602	261502	1.27927	0.00160519	0.0116927	2.88767	1.52991	up
Zmjp005262	2-Hydroxyl emodin-1-methyl ether	Quinones	Anthraquinone	C16H12O6	3	346434-45-5	1.02654e+06	1.0587e+06	1.08911e+06	248909	204418	162033	1.26813	2.3456e-05	0.00127439	5.15852	2.36696	up
Zmjp006741	Chrysosplenoside E*	Flavonoids	Flavonols	C25H28O13	1	-	2.3057e+06	2.26475e+06	2.30936e+06	5.53741e+06	4.7193e+06	4.90948e+06	1.27291	0.00775376	0.0315305	0.453629	-1.14042	down
Zmjp006451	3,6,7,4'-tetramethylquercetagetin 3'-O-beta-D-glucoside*	Flavonoids	Flavonols	C25H28O13	1	-	2.25911e+06	2.17269e+06	2.18025e+06	5.32509e+06	4.87751e+06	4.81911e+06	1.27819	0.00256623	0.0155813	0.440167	-1.18388	down
Zmjp004311	Chrysosplenetin-4'-O-glucoside*	Flavonoids	Flavonols	C25H28O13	1	23279-19-8	2.25911e+06	2.17269e+06	2.18025e+06	5.32509e+06	4.87751e+06	4.81911e+06	1.27819	0.00256623	0.0155813	0.440167	-1.18388	down
MWS4354	N6-methyladenosine	Nucleotides and derivatives	Nucleotides and derivatives	C11H15N5O4	3	1867-73-8	751760	816782	742816	259321	272689	337165	1.26359	0.000137495	0.0029091	2.65926	1.41102	up
Yalp008917	(3R,5R,7R,8R,10S,13S,17R)-17-((S)-7,7-dimethyl-2,3,6,7-tetrahydrooxepin-3-yl)-4,4,8,10,13-pentamethyl-2,3,4,5,6,7,8,9,10,11,12,13,16,17-tetradecahydro-1H-cyclopenta[a]phenanthrene-3,7-diyl diacetate	Terpenoids	Triterpene	C34H52O5	3	-	53467.2	55605.6	46722.4	137709	107463	97163.7	1.22882	0.0312901	0.0776461	0.455095	-1.13576	down
Wbmp010360	[(1S,2R,3R,4S,5R,6S,8R,12R,13S,16R,19S,20R,21S)-14-ethyl-4,6,19-trimethoxy-16-methyl-9,11-dioxa-14-azaheptacyclo[10.7.2.12,5.01,13.03,8.08,12.016,20]docosan-21-yl]3,5-dinitrobenzoate	Alkaloids	Alkaloids	C32H41N3O11	3	-	620838	533433	413106	1.7408e+06	1.93626e+06	1.69413e+06	1.25711	0.000238778	0.00402462	0.291812	-1.77689	down
Zmmp002946	(3-(carboxyamino)-2-methylpropanoyl)phenylalanine	Amino acids and derivatives	Amino acids and derivatives	C14H18N2O5	3	-	1.44902e+06	1.54929e+06	1.32333e+06	625340	654517	656651	1.27342	0.00575263	0.025818	2.23166	1.15812	up
Wayp003781	N-Hydroxynonanoyl nornicotine glucoside	Alkaloids	Pyridine alkaloids	C24H38N2O7	2	-	9.64978e+06	1.80791e+07	1.20678e+07	6.21219e+06	3.83011e+06	6.17184e+06	1.12473	0.077094	0.146583	2.45445	1.2954	up
Zmdp006307	sanshodiol*	Lignans and Coumarins	Lignans	C20H22O6	1	-	2.26856e+06	2.36286e+06	2.0763e+06	247405	540486	300767	1.24297	0.000113161	0.00272166	6.16145	2.62327	up
Zmhp003514	6,7,8-Tetrahydroxy-5-methoxyflavone*	Flavonoids	Flavones	C16H12O6	3	-	1.2941e+07	1.38857e+07	1.3219e+07	2.19592e+06	2.61362e+06	2.98912e+06	1.27467	1.09207e-05	0.000949517	5.13495	2.36035	up
Zjyp102907	8-hydroxy-1,4a-dimethyl-7-(prop-1-en-2-yl)-4,4a,5,6,7,8-hexahydronaphthalen-2(3H)-one*	Terpenoids	Sesquiterpenoids	C15H22O2	2	-	749617	726356	609588	287235	299321	370997	1.241	0.00366627	0.0194658	2.17801	1.12301	up
pmc0960	LysoPC 20:4	Lipids	LPC	C28H50NO7P	3	-	2.66508e+06	2.72353e+06	2.69436e+06	7.60322e+06	1.00117e+07	6.85665e+06	1.2562	0.0290171	0.0740291	0.330301	-1.59815	down
mws0675	Nicotinamide D-ribonucleotide	Nucleotides and derivatives	Nucleotides and derivatives	C11H15N2O8P	3	1094-61-7	530915	536482	520404	1.56185e+06	1.63002e+06	1.28575e+06	1.26979	0.0116042	0.0402792	0.354608	-1.4957	down
NK10251888	NG,NG-Dimethyl-L-arginine*	Amino acids and derivatives	Amino acids and derivatives	C8H18N4O2	1	30315-93-6	2.69661e+07	2.77993e+07	2.75984e+07	1.03989e+07	1.05794e+07	9.25881e+06	1.27788	2.1538e-05	0.00126266	2.72393	1.44569	up
MW0148044	Cys-Met-Asp	Amino acids and derivatives	Amino acids and derivatives	C12H21N3O6S2	3	-	5.82404e+06	5.09996e+06	4.79939e+06	2.06019e+06	2.18305e+06	1.84448e+06	1.26655	0.00497994	0.0233895	2.58281	1.36894	up
MWSmce251	N-Benzoyl-(2R,3S)-3-phenylisoserine	Amino acids and derivatives	Amino acids and derivatives	C16H15NO4	3	132201-33-3	2.98444e+06	3.84249e+06	2.2478e+06	604206	533475	613333	1.25828	0.0334955	0.0810636	5.18256	2.37366	up
Smdp007779	8-Demethylfarrerol	Flavonoids	Flavanones	C16H14O5	2	-	2.58286e+06	2.60271e+06	2.58418e+06	5.44248e+06	6.80959e+06	5.58527e+06	1.26427	0.0162905	0.0495048	0.43559	-1.19896	down
MWSslk237	Homoplantaginin*	Flavonoids	Flavones	C22H22O11	1	17680-84-1	4.59186e+07	3.25567e+07	5.31026e+07	2.12332e+07	1.512e+07	1.89293e+07	1.18619	0.0424082	0.0952407	2.3801	1.25102	up
Hmmp004965	Diosmetin-7-O-glucoside*	Flavonoids	Flavones	C22H22O11	1	20126-59-4	4.59186e+07	3.25567e+07	5.31026e+07	2.12332e+07	1.512e+07	1.89293e+07	1.18619	0.0424082	0.0952407	2.3801	1.25102	up
Lmjp003655	6-C-MethylKaempferol-3-glucoside	Flavonoids	Flavonols	C22H22O11	1	-	4.59186e+07	3.25567e+07	5.31026e+07	2.12332e+07	1.512e+07	1.89293e+07	1.18619	0.0424082	0.0952407	2.3801	1.25102	up
pmp000579	Diosmetin-7-O-galactoside*	Flavonoids	Flavones	C22H22O11	1	-	4.59186e+07	3.25567e+07	5.31026e+07	2.12332e+07	1.512e+07	1.89293e+07	1.18619	0.0424082	0.0952407	2.3801	1.25102	up
Lahp004593	Rhamnazin 3-O-β-D-glucopyranoside(Flavoyadorinin A)*	Flavonoids	Flavonols	C23H24O12	3	20486-38-8	7.66134e+06	8.44274e+06	5.4486e+06	1.89337e+06	2.07963e+06	4.00711e+06	1.13698	0.0181906	0.053176	2.7008	1.43339	up
Hmgp002238	Jaceoside*	Flavonoids	Flavones	C23H24O12	3	25474-11-7	7.66134e+06	8.44274e+06	5.4486e+06	1.89337e+06	2.07963e+06	4.00711e+06	1.13698	0.0181906	0.053176	2.7008	1.43339	up
Lhlp120611	Hydroxycarvone	Terpenoids	Monoterpenoids	C10H14O2	3	-	1.56268e+06	2.38938e+06	1.85974e+06	692403	515751	981679	1.17071	0.0202684	0.0570313	2.65399	1.40816	up
MWS1830	Ethylsalicylate	Phenolic acids	Phenolic acids	C9H10O3	3	118-61-6	6.81108e+06	1.03312e+07	5.99829e+06	2.16362e+06	2.02745e+06	4.16512e+06	1.12904	0.045975	0.100445	2.76927	1.46951	up
Hajp009554	2',4'-Dihydroxy-4-methoxychalcone	Flavonoids	Chalcones	C16H14O4	2	19309-14-9	8.51791e+06	8.45177e+06	8.32851e+06	1.80721e+06	1.78452e+06	1.60068e+06	1.281	2.25458e-07	0.000323323	4.87216	2.28456	up
MWS1872	Hydroxyanthraquinone	Quinones	Anthraquinone	C14H8O3	3	129-43-1	2.44051e+06	2.59213e+06	2.59913e+06	1.21423e+06	1.13425e+06	1.14879e+06	1.27899	0.000217113	0.00399318	2.18221	1.12579	up
Lcyp000673	Prudomestin	Flavonoids	Flavonols	C17H14O7	3	3443-28-5	1.26333e+06	1.21149e+06	1.22013e+06	471421	595306	469588	1.26214	0.00115946	0.00982744	2.40508	1.26608	up
pmb0876	LysoPE 16:0	Lipids	LPE	C21H44NO7P	2	53862-35-4	1.45698e+06	1.36451e+06	1.85516e+06	4.01925e+06	3.05362e+06	4.27856e+06	1.22325	0.0162188	0.0494859	0.411987	-1.27933	down
Wagp010987	Gossypetin 3,7,8,3',4'-pentamethyl ether*	Flavonoids	Flavonols	C20H20O8	2	-	80330.9	73297.6	131250	279588	293488	305673	1.22358	0.00345815	0.0186422	0.324186	-1.62511	down
zjbp110806	6-hydroxy-7-methoxy-2-[2-(4'-hydroxyphenyl)ethyl]chromone*	Others	Chromone	C18H16O5	3	-	6.81879e+06	9.5239e+06	8.4805e+06	1.27214e+06	2.06997e+06	1.60048e+06	1.25484	0.00925135	0.0354195	5.0223	2.32835	up
HJAP056	Dihydroxy-dimethoxyflavone-7-O-glucoside*	Flavonoids	Flavonols	C23H24O11	1	-	9.60008e+06	9.95635e+06	1.0174e+07	5.17504e+06	3.26641e+06	3.98137e+06	1.22808	0.00562744	0.0254456	2.39321	1.25895	up
Zmmp003957	Phe-Glu-Leu	Amino acids and derivatives	Amino acids and derivatives	C20H29N3O6	3	-	365098	389078	478461	1.36768e+06	1.21124e+06	1.40152e+06	1.26679	0.000593894	0.00711156	0.309674	-1.69118	down
MW0150927	His-Glu-Thr	Amino acids and derivatives	Amino acids and derivatives	C15H23N5O7	3	-	2.96747e+07	3.42117e+07	2.87584e+07	7.99054e+06	8.88804e+06	8.33652e+06	1.27685	0.00475048	0.0226574	3.67418	1.87742	up
Lmmp002795	Pratensein-7-O-glucoside	Flavonoids	Isoflavones	C22H22O11	3	36191-03-4	1.15368e+06	1.2649e+06	1.40211e+06	415626	565289	379089	1.24249	0.00108731	0.00950213	2.80932	1.49022	up
MWSprf117	5-Hydroxytryptophan	Amino acids and derivatives	Amino acids and derivatives	C11H12N2O3	1	4350-09-8	2.08179e+06	2.10709e+06	2.12786e+06	985700	982750	849234	1.273	0.000674925	0.00768923	2.24182	1.16467	up
Lskp211385	dihydrosesamin*	Lignans and Coumarins	Lignans	C20H20O6	3	-	1.61881e+06	1.2407e+06	1.33775e+06	529810	731994	786620	1.19068	0.00896952	0.0348074	2.04902	1.03493	up
Sayp006468	Acutissimalignan B*	Lignans and Coumarins	Lignans	C20H20O6	3	-	1.61881e+06	1.2407e+06	1.33775e+06	529810	731994	786620	1.19068	0.00896952	0.0348074	2.04902	1.03493	up
pmc0066	2'-Deoxyinosine 5'-phosphate	Nucleotides and derivatives	Nucleotides and derivatives	C10H13N4O7P	3	3393-18-8	4.02662e+07	3.40016e+07	3.76841e+07	8.70499e+07	9.18844e+07	1.0124e+08	1.26951	0.00177398	0.012606	0.39958	-1.32344	down
Lmyp005841	Chrysin-7-O-glucoside*	Flavonoids	Flavones	C21H20O9	1	31025-53-3	1.20567e+06	2.06492e+06	1.15655e+06	547319	664068	668311	1.15652	0.0999002	0.177586	2.35524	1.23587	up
mws1175	Pinostrobin	Flavonoids	Flavanones	C16H14O4	2	480-37-5	470285	424995	433228	1.11951e+06	1.13635e+06	1.13071e+06	1.27972	9.88961e-05	0.00246277	0.392287	-1.35002	down
Lmzp004885	Tricin	Flavonoids	Flavones	C17H14O7	3	520-32-1	1.23946e+06	1.29667e+06	1.17589e+06	411515	493994	424520	1.27298	9.58928e-05	0.00240931	2.79094	1.48075	up
Sayp009177	vouacapenic acid	Terpenoids	Ditepenoids	C20H28O3	3	-	590663	728923	738678	1.56992e+06	1.13422e+06	1.48979e+06	1.20994	0.0233389	0.0627876	0.490772	-1.02687	down
MWStz497	Matairesinol*	Lignans and Coumarins	Lignans	C20H22O6	1	580-72-3	1.29495e+08	1.87889e+08	1.76004e+08	2.46892e+07	4.23844e+07	2.89447e+07	1.24731	0.0121062	0.0415287	5.13848	2.36134	up
MWStz070	N-(2-Hydroxy-4-methoxyphenyl)acetamide	Alkaloids	Alkaloids	C9H11NO3	1	58469-06-0	1.63591e+07	1.5754e+07	1.58329e+07	6.52892e+06	6.67479e+06	7.21999e+06	1.27884	5.98638e-06	0.000732421	2.34757	1.23117	up
Lmhp008801	LysoPE 18:3	Lipids	LPE	C23H42NO7P	2	-	284364	414375	283313	976376	1.06363e+06	1.336e+06	1.24325	0.00963539	0.0363458	0.290892	-1.78144	down
Lmyp006086	Prunetin-5-O-glucoside*	Flavonoids	Isoflavones	C22H22O10	3	-	685324	884125	718676	336932	419128	297340	1.21924	0.00843278	0.0333753	2.17213	1.11911	up
Lmqp010784	Progesterone	Terpenoids	Ditepenoids	C21H30O2	2	57-83-0	7.60732e+06	8.07606e+06	5.85602e+06	2.0135e+06	1.33861e+06	2.00114e+06	1.24775	0.00952149	0.0360127	4.02361	2.00849	up
Zmlp009380	Jolkinolide D	Terpenoids	Ditepenoids	C20H28O3	3	-	128345	163140	124495	252905	312966	307257	1.23047	0.0044833	0.0221723	0.476425	-1.06968	down
Wdgp005371	3-alpha(S)-Strictosidine	Alkaloids	Plumerane	C27H34N2O9	2	20824-29-7	2.39018e+07	2.32077e+07	2.09426e+07	5.47448e+06	5.60157e+06	5.94656e+06	1.27967	0.00224617	0.0142405	3.99775	1.99919	up
mws0250	L-Tyrosine*	Amino acids and derivatives	Amino acids and derivatives	C9H11NO3	1	60-18-4	3.83862e+07	3.73638e+07	3.72228e+07	1.46591e+07	1.45057e+07	1.61689e+07	1.27868	1.22147e-05	0.000949517	2.49203	1.31732	up
mws1375	Nicotianamine	Alkaloids	Alkaloids	C12H21N3O6	2	34441-14-0	1.70048e+07	1.69785e+07	1.60803e+07	4.87135e+07	5.33011e+07	5.01822e+07	1.28044	0.00099591	0.00908973	0.32894	-1.60411	down
Lssp210111	2α-Acetoxy-14β-[(S)-2-methyl-butyryloxy]-4(20),11-taxadiene	Others	Others	C27H42O6	2	-	1.40492e+06	1.63514e+06	1.04012e+06	505600	479329	513396	1.23751	0.0377923	0.0873849	2.72316	1.44528	up
pmp000791	Moracin Y	Phenolic acids	Phenolic acids	C15H10O5	3	1252581-54-6	9.71619e+06	1.08249e+07	1.04339e+07	1.42881e+06	1.61712e+06	1.65161e+06	1.28037	0.000895043	0.00880893	6.59389	2.72113	up
MWS20151	Apigenin*	Flavonoids	Flavones	C15H10O5	3	520-36-5	9.71619e+06	1.08249e+07	1.04339e+07	1.42881e+06	1.61712e+06	1.65161e+06	1.28037	0.000895043	0.00880893	6.59389	2.72113	up
pme1210	L-Methionine	Amino acids and derivatives	Amino acids and derivatives	C5H11NO2S	3	63-68-3	1.54202e+06	1.42144e+06	1.53385e+06	430390	455907	476637	1.27973	0.000478842	0.00635595	3.29973	1.72235	up
pmb0889	Punicic acid	Lipids	Free fatty acids	C18H30O2	3	544-72-9	4.00476e+06	3.89885e+06	3.57231e+06	1.46353e+06	1.85188e+06	2.16249e+06	1.22303	0.00221019	0.0141605	2.09495	1.06691	up
Safp001796	4-Hydroxy-l-tryptophan	Amino acids and derivatives	Amino acids and derivatives	C11H12N2O3	1	25242-90-4	3.33371e+06	3.38031e+06	3.21605e+06	1.57888e+06	1.49862e+06	1.37766e+06	1.2755	2.33401e-05	0.00127439	2.22889	1.15633	up
Wadp008782	7-Oxo-pimara-15-en-3,19-diol	Terpenoids	Ditepenoids	C20H32O3	3	-	506359	380214	742218	228516	213109	271857	1.13684	0.0988624	0.175964	2.28288	1.19085	up
zjbp110805	6-hydroxy-2-[2-(3-methoxy-4-hydroxyphenyl)ethyl]chromone*	Others	Chromone	C18H16O5	3	-	9.09014e+06	7.98178e+06	8.31313e+06	1.36037e+06	2.48583e+06	1.373e+06	1.24393	0.000190761	0.00362704	4.86378	2.28208	up
Lahp005751	6-Demethoxy-4'-O-methylcapillarisin*	Flavonoids	Other Flavonoids	C16H12O6	3	61854-35-1	1.22579e+07	1.37383e+07	1.37113e+07	2.38715e+06	2.47886e+06	2.83095e+06	1.27871	0.00110232	0.00954444	5.15886	2.36705	up
MWSHC20110	8-Methoxyapigenin*	Flavonoids	Flavones	C16H12O6	3	57096-02-3	1.22579e+07	1.37383e+07	1.37113e+07	2.38715e+06	2.47886e+06	2.83095e+06	1.27871	0.00110232	0.00954444	5.15886	2.36705	up
Hmqp006235	LysoPC 18:4	Lipids	LPC	C26H46NO7P	3	-	756854	871689	730360	3.50039e+06	3.52241e+06	4.02266e+06	1.27717	0.00213042	0.0137816	0.213563	-2.22727	down
Lmhp007840	LysoPC 19:2	Lipids	LPC	C27H52NO7P	3	-	452000	564356	607309	1.32265e+06	1.2436e+06	1.2345e+06	1.2544	0.000551992	0.00690036	0.427195	-1.22703	down
Wagp002398	Tryptophan N-Rutinoside	Amino acids and derivatives	Amino acids and derivatives	C23H32N2O11	1	-	209086	283576	270712	986191	748292	783277	1.25416	0.0103127	0.0373967	0.303196	-1.72168	down
MWS04559g	3-Hydroxy-L-phenylalanine*	Amino acids and derivatives	Amino acids and derivatives	C9H11NO3	1	587-33-7	3.74264e+07	3.79884e+07	3.76285e+07	1.48081e+07	1.43735e+07	1.52914e+07	1.28161	1.79506e-06	0.00060147	2.54185	1.34588	up
Lmcp002302	N6-(2-Hydroxyethyl)adenosine*	Nucleotides and derivatives	Nucleotides and derivatives	C12H17N5O5	2	4338-48-1	535791	568214	388002	275198	217247	231078	1.19685	0.034174	0.0815654	2.06214	1.04414	up
MWSmce270	Rosmanol	Terpenoids	Ditepenoids	C20H26O5	3	80225-53-2	465444	334888	294821	958692	1.01754e+06	801120	1.21951	0.00292761	0.0167106	0.394315	-1.34258	down
Lajp006633	5,8-dihydroxy-6,7,3',4'-tetramethoxyflavone-8-O-β-D-glucoside*	Flavonoids	Flavones	C25H28O13	1	-	2.33036e+06	2.18975e+06	2.15597e+06	5.03407e+06	4.46537e+06	4.58301e+06	1.27387	0.00260862	0.0156626	0.474071	-1.07682	down
Wagp007602	Demethoxysudachitin*	Flavonoids	Flavones	C17H14O7	1	4323-80-2	116724	134159	125099	34469.2	84249	66783.3	1.04922	0.0374063	0.0867063	2.02684	1.01923	up
mws0847	1-Methyladenine	Nucleotides and derivatives	Nucleotides and derivatives	C6H7N5	3	5142-22-3	205744	256404	198691	61785.2	69034.1	78363.4	1.26166	0.0103011	0.0373967	3.15915	1.65954	up
HJKP000649	N-benzylformamide*	Alkaloids	Alkaloids	C8H9NO	1	6343-54-0	1.53074e+07	1.53723e+07	1.6251e+07	6.43564e+06	6.21154e+06	7.07606e+06	1.27623	2.73871e-05	0.0013816	2.37946	1.25063	up
pme1383	Pyridoxine	Others	Vitamin	C8H11NO3	3	65-23-6	4.31904e+06	4.75477e+06	4.98796e+06	2.33507e+06	2.0885e+06	2.02233e+06	1.26729	0.00160821	0.0116927	2.18151	1.12532	up
Lmgp000659	2-Phenylacetamide*	Alkaloids	Alkaloids	C8H9NO	1	103-81-1	1.53074e+07	1.53723e+07	1.6251e+07	6.43564e+06	6.21154e+06	7.07606e+06	1.27623	2.73871e-05	0.0013816	2.37946	1.25063	up
Zjyp110109	oxyphyllone F	Terpenoids	Sesquiterpenoids	C11H16O2	3	-	837271	947552	1.04759e+06	440904	509233	298818	1.18649	0.00369722	0.0195197	2.26783	1.18131	up
Lahp002797	Methyl Orsellinate	Phenolic acids	Phenolic acids	C9H10O4	3	3187-58-4	437441	444519	416040	1.02055e+06	800952	883335	1.25735	0.0167671	0.0504088	0.479882	-1.05925	down
pmb0862	LysoPC 12:0	Lipids	LPC	C20H42NO7P	3	20559-18-6	86379.4	143046	118003	265948	322981	221336	1.17933	0.0177541	0.0523141	0.428784	-1.22168	down
MW0155809	Pro-Asp-Glu	Amino acids and derivatives	Amino acids and derivatives	C14H21N3O8	3	-	2.86115e+06	2.7933e+06	3.23828e+06	690067	658298	828701	1.2736	0.00142483	0.0109849	4.08473	2.03024	up
Wbsp000107	2-[(5s)-5-hydroxyhexa-1,3-dien-1-yl]-5-methoxy-4-[(3r)-3-methoxybutanoyl]-2-methylfuran-3-one	Others	Ketone compounds	C17H24O6	3	-	5.06162e+06	3.8079e+06	3.8897e+06	1.10526e+06	1.57685e+06	1.424e+06	1.24528	0.0120808	0.0415084	3.10737	1.6357	up
HJAP044	1-(2,4,5-Trimethoxyphenyl)propan-1-one	Phenolic acids	Phenolic acids	C12H16O4	3	3904-18-5	1.02209e+06	1.38363e+06	860703	619790	523888	407475	1.14777	0.0508851	0.108314	2.1058	1.07437	up
mws0224	Methionine	Amino acids and derivatives	Amino acids and derivatives	C5H11NO2S	3	59-51-8	1.99604e+06	1.83031e+06	2.02931e+06	624564	661497	856046	1.25735	0.000225901	0.00402462	2.73359	1.4508	up
MWSHY0049	Hesperetin	Flavonoids	Flavanones	C16H14O6	3	520-33-2	970368	946967	1.06888e+06	413180	553496	479216	1.24339	0.000762595	0.00809287	2.06531	1.04636	up
Lhhp111111	Schisantherin E	Lignans and Coumarins	Lignans	C30H34O9	3	64917-83-5	419201	729322	506612	1.33658e+06	1.13924e+06	875019	1.11451	0.030683	0.0766122	0.493946	-1.01757	down
Cmpp007319	7-Methoxy-5-Prenyloxycoumarin	Lignans and Coumarins	Coumarins	C15H16O4	3	35590-41-1	641053	687472	625711	248721	294395	251188	1.27077	0.00011527	0.0027258	2.46032	1.29884	up
MWS201470	Met-Arg	Amino acids and derivatives	Amino acids and derivatives	C11H23N5O3S	3	60461-10-1	189184	166741	150543	70344.5	86602.3	41528	1.16164	0.004379	0.0217712	2.5518	1.35152	up
mws3133	N-Acetyl-L-hydroxyproline	Amino acids and derivatives	Amino acids and derivatives	C7H11NO4	3	33996-33-7	3.8109e+06	3.74919e+06	3.68685e+06	7.83828e+06	8.20365e+06	7.95004e+06	1.28137	0.000203778	0.00382287	0.46878	-1.09302	down
mws0049	Gallocatechin	Flavonoids	Flavanols	C15H14O7	2	970-73-0	3.31542e+06	3.95015e+06	3.71781e+06	1.81049e+06	1.68483e+06	1.59028e+06	1.26542	0.00464315	0.0224495	2.1597	1.11083	up
pmp000238	Luteolin-6-C-arabinoside-7-O-glucoside	Flavonoids	Flavones	C26H28O15	3	-	899350	810712	1.19467e+06	1.64882e+06	2.83927e+06	2.19754e+06	1.15941	0.0549396	0.114434	0.434474	-1.20266	down
Zmbp000449	Epigoitrin	Others	Others	C5H7NOS	2	1072-93-1	9.54309e+06	9.52665e+06	8.89599e+06	2.2374e+06	2.44351e+06	2.36993e+06	1.28095	0.000419382	0.00593036	3.9663	1.98779	up
mws1050	O-Acetyl-L-serine	Amino acids and derivatives	Amino acids and derivatives	C5H9NO4	3	5147-00-2	748634	853542	778508	1.91459e+06	1.66266e+06	1.64014e+06	1.26624	0.00433299	0.0216202	0.456298	-1.13195	down
Layp003558	3,4,5-Trimethoxyphenol-1-O-β-D-glucoside	Others	Others	C15H22O9	3	-	1.0689e+06	1.01638e+06	1.28423e+06	260725	327125	290370	1.26932	0.00709585	0.0297393	3.83675	1.93988	up
Wbtp003818	1-hydroxy-7-{[(2s,3r,4s,5r,6r)-3,4,5-trihydroxy-6-(hydroxymethyl)oxan-2-yl]oxy}xanthen-9-one	Flavonoids	Other Flavonoids	C19H18O9	2	-	5.13571e+06	2.49966e+06	4.61067e+06	2.01362e+06	1.77756e+06	1.55733e+06	1.09954	0.100295	0.177727	2.28962	1.19511	up
Waptp05012	2-(2-Methoxyphenyl)-1-(2,4,6-trihydroxyphenyl)ethanone*	Others	Stilbene	C15H14O5	1	116854-95-6	3.77577e+06	3.17136e+06	3.83305e+06	8.49609e+06	7.91384e+06	7.40114e+06	1.26174	0.000690254	0.00770783	0.452738	-1.14325	down
Lmtp004146	Santalin*	Others	Ketone compounds	C15H14O5	1	7400-10-4	3.75987e+06	3.00833e+06	3.25795e+06	8.58582e+06	8.35369e+06	7.31194e+06	1.26122	0.00145267	0.0111385	0.413425	-1.2743	down
Wbjp002990	7,15,16,17-tetramethoxy-3,5-dioxa-11-azapentacyclo[10.7.1.02,6.08,20.014,19]icosa-1,6,8(20),14,16,18-hexaene	Alkaloids	Alkaloids	C21H23NO6	3	-	2.75199e+07	3.11481e+07	3.18934e+07	8.81605e+06	6.71098e+06	8.39191e+06	1.26975	0.000852099	0.00862497	3.78618	1.92074	up
pmp000392	Liquiritigenin-7-O-apioside-4'-O-glucoside	Flavonoids	Flavanones	C26H30O13	3	199796-12-8	553811	359582	727290	268050	238739	241064	1.11944	0.106118	0.185707	2.19386	1.13347	up
Hmyp002656	Methyl dioxindole-3-acetate	Alkaloids	Plumerane	C11H11NO4	1	57061-18-4	8.71011e+07	8.49276e+07	8.60003e+07	2.38478e+07	2.31424e+07	2.37073e+07	1.28237	1.90382e-05	0.00118162	3.64976	1.8678	up
MWSprf134	Plantagoside	Flavonoids	Flavanones	C21H22O12	3	78708-33-5	1.49985e+07	9.79442e+06	1.60913e+07	6.41639e+06	6.93198e+06	5.6741e+06	1.17161	0.0597422	0.121382	2.14926	1.10384	up
MWStz500	Iristectorin A*	Flavonoids	Isoflavones	C23H24O12	3	37744-61-9	166816	141974	223921	65291.5	61819.3	106532	1.13703	0.0338605	0.081308	2.28003	1.18905	up
pmb0736	Tricin-7-O-Glucoside*	Flavonoids	Flavones	C23H24O12	3	32769-01-0	166816	141974	223921	65291.5	61819.3	106532	1.13703	0.0338605	0.081308	2.28003	1.18905	up
Lmtp003948	3',5',5,7-Tetrahydroxy-4'-methoxyflavanone-3'-O-glucoside	Flavonoids	Flavanones	C22H24O12	2	-	1.34372e+06	1.08857e+06	1.65903e+06	2.95612e+06	1.77057e+06	3.79682e+06	1.03642	0.119531	0.202325	0.480006	-1.05888	down
Lmpp003465	Myricetin-3-O-β-D-glucoside*	Flavonoids	Flavonols	C21H20O13	1	19833-12-6	1.34372e+06	1.08857e+06	1.65903e+06	2.95612e+06	1.77057e+06	3.79682e+06	1.03642	0.119531	0.202325	0.480006	-1.05888	down
pmp001012	6-Hydroxy-1,2,3,7-tetramethoxyxanthone	Flavonoids	Other Flavonoids	C17H16O7	2	64756-87-2	904548	780427	1.04062e+06	442665	475157	401697	1.23882	0.0185619	0.053408	2.06559	1.04656	up
Hmbp002333	10-Dehydrogeniposide	Terpenoids	Monoterpenoids	C17H22O10	3	-	146342	139887	191740	59453.1	73358.7	79557.4	1.21965	0.0219736	0.0599163	2.25065	1.17034	up
Cmpp007452	Auraptenol	Lignans and Coumarins	Coumarins	C15H16O4	3	1221-43-8	684850	598206	533209	177789	205023	201535	1.26828	0.00921203	0.035317	3.1082	1.63608	up
pmp001310	6-Hydroxykaempferol-3,6-O-diglucoside	Flavonoids	Flavonols	C27H30O17	3	142674-16-6	129532	242370	370488	82274.2	102881	90096.8	1.05674	0.153768	0.243366	2.69713	1.43143	up
Lhsp101905	Actinidialactone	Terpenoids	Monoterpenoids	C10H14O2	3	76729-80-1	1.18754e+07	1.1086e+07	1.1565e+07	5.73377e+06	4.93839e+06	5.32104e+06	1.27299	4.49838e-05	0.00164395	2.15882	1.11024	up
Ljmp121505	Mansonone S	Terpenoids	Sesquiterpenoids	C15H18O3	3	-	1.67258e+06	1.60854e+06	1.97178e+06	725841	727882	551073	1.24966	0.00325875	0.01789	2.62017	1.38966	up
Hmcp002354	Crenatine	Alkaloids	Plumerane	C14H14N2O	3	26585-14-8	674606	552242	635917	167181	151095	167963	1.27588	0.00527744	0.0243454	3.83097	1.93771	up
Zmdp001857	γ-Glu-Tyr	Amino acids and derivatives	Amino acids and derivatives	C14H18N2O6	3	7432-23-7	1.10868e+06	1.20285e+06	1.16677e+06	214371	271774	248028	1.27692	4.61701e-05	0.00164459	4.7377	2.24419	up
Lmhp009497	LysoPE 20:4*	Lipids	LPE	C25H44NO7P	2	-	23803.5	45842	56428.1	275379	65284.8	331982	1.02295	0.152019	0.241276	0.187429	-2.41558	down
Walbp05751	12-Hydroxy-4,4-bisnor-4,8,11,13-podocarpatetraen-3-one	Others	Others	C15H16O2	3	-	1.03048e+06	1.1356e+06	868903	407549	582243	376177	1.19751	0.00578709	0.0258846	2.22185	1.15176	up
zjbp110804	6,7-dimethoxy-2-[2-(4'-hydroxy-3'-methoxyphenyl)ethyl]chromone	Others	Chromone	C20H20O6	3	-	1.30564e+06	1.27695e+06	1.63785e+06	527896	707186	709262	1.21969	0.0100842	0.0371779	2.17062	1.11811	up
Wagp006511	7-Demethyltangeretin	Flavonoids	Flavones	C19H18O7	3	73213-66-8	51237.6	43821.4	66335.7	157002	102619	154359	1.19383	0.0294307	0.074678	0.389861	-1.35897	down
Lmtp007747	Santalic acid*	Terpenoids	Sesquiterpenoids	C15H22O2	3	73590-17-7	735524	560593	621573	174619	316535	79996.6	1.09932	0.00787513	0.0319778	3.35759	1.74743	up
Lmmp005689	Cajanin*	Flavonoids	Isoflavones	C16H12O6	3	32884-36-9	1.05177e+06	1.06603e+06	1.19221e+06	161520	200674	188368	1.27796	0.00135231	0.0106594	6.01206	2.58786	up
WaTKp08991	4-Phenylhept-6-enoic acid	Phenolic acids	Phenolic acids	C13H16O2	3	-	3.46872e+06	2.77586e+06	3.64339e+06	934665	961863	935337	1.27084	0.0123748	0.0419047	3.49169	1.80392	up
pmb0881	LysoPE 18:2	Lipids	LPE	C23H44NO7P	2	-	470681	504557	719234	2.15424e+06	1.37534e+06	2.17016e+06	1.21765	0.0283739	0.0731173	0.29729	-1.75006	down
Lmjp007279	Penduletin 4'-Methyl Ether (5-Hydroxy-3,6,7,4'-Tetramethoxyflavone)	Flavonoids	Flavonols	C19H18O7	2	14787-34-9	4.96453e+06	4.66367e+06	4.36428e+06	9.01369e+06	9.57784e+06	1.03772e+07	1.26799	0.00209748	0.0136312	0.48302	-1.04984	down
MWSslk013	Tectoridin	Flavonoids	Isoflavones	C22H22O11	3	611-40-5	5.33472e+07	3.9077e+07	4.97488e+07	2.04942e+07	1.85844e+07	1.67195e+07	1.24731	0.0166331	0.050113	2.54799	1.34936	up
Zmgp004060	paratensein-7-O-glucoside	Flavonoids	Isoflavones	C22H22O11	3	-	5.33472e+07	3.9077e+07	4.97488e+07	2.04942e+07	1.85844e+07	1.67195e+07	1.24731	0.0166331	0.050113	2.54799	1.34936	up
Zmjp009119	Chrysosplenetin (5,4'-Dihydroxy-3,6,7,3'-tetramethoxyflavone)*	Flavonoids	Flavones	C19H18O8	1	603-56-5	82290.3	54680.1	99988	176901	191145	185134	1.18771	0.00990927	0.0367387	0.428356	-1.22312	down
Qmjp012113	Hypericumoxide N	Others	Others	C34H52O6	3	-	62004.9	44319.1	53121.8	157005	100585	67158.7	1.00261	0.166158	0.257614	0.490983	-1.02626	down
pme1261	Pantothenol	Others	Vitamin	C9H19NO4	3	16485-10-2	22898	25120.1	24532.9	34631.4	58397.6	52083.9	1.15627	0.0753189	0.14446	0.499963	-1.00011	down
Zbsp002083	Pelargonin	Flavonoids	Anthocyanidins	C27H31O15+	3	58751-31-8	935131	1.6499e+06	860408	732352	306198	392964	1.03626	0.0985871	0.175696	2.40685	1.26715	up
Lmhp007598	LysoPC 19:2(2n isomer)	Lipids	LPC	C27H52NO7P	3	-	531969	518196	505136	1.18904e+06	1.37851e+06	1.33549e+06	1.27585	0.00470461	0.0225533	0.398484	-1.32741	down
Lmhp008589	LysoPE 18:3(2n isomer)	Lipids	LPE	C23H42NO7P	1	-	167613	99550.6	179431	511460	509411	326560	1.17984	0.0261724	0.0685745	0.331441	-1.59317	down
Zasp005105	Annulatin 3'-O-β-D-xyloside	Flavonoids	Flavones	C21H20O12	3	-	92227.1	81800.2	138487	470209	363804	219524	1.16543	0.0694511	0.137051	0.296633	-1.75325	down
pmb0374	2-Aminopurine	Nucleotides and derivatives	Nucleotides and derivatives	C5H5N5	2	452-06-2	3.72552e+06	3.71857e+06	3.26576e+06	1.05747e+07	1.00888e+07	1.16634e+07	1.27469	0.00198781	0.0133568	0.331299	-1.59379	down
MWSmce024	Scopolin	Lignans and Coumarins	Coumarins	C16H18O9	3	531-44-2	438176	418174	388523	1.15513e+06	1.16953e+06	1.13192e+06	1.27933	4.42962e-06	0.00065605	0.360146	-1.47335	down
Zmjp000182	N(omega)-Methyl-L-arginine*	Amino acids and derivatives	Amino acids and derivatives	C7H16N4O2	1	17035-90-4	7.20398e+07	5.8589e+07	5.94602e+07	2.86382e+07	3.57304e+07	3.06127e+07	1.23826	0.00802529	0.0324005	2.00133	1.00096	up
pma0104	N-Sinapoylhydroxycoumarin	Lignans and Coumarins	Coumarins	C20H16O7	3	-	1.75207e+06	1.50285e+06	2.00313e+06	644736	407592	381635	1.23518	0.00367432	0.0194718	3.66679	1.87452	up
MWSHY0022	Flavokawain C*	Flavonoids	Chalcones	C17H16O5	3	37308-75-1	65760.4	67018.3	48480.9	355582	559781	443834	1.26504	0.0210334	0.0582558	0.133358	-2.90662	down
WaTKp18641	Methyl 3-phenylhex-2-enoate	Phenolic acids	Phenolic acids	C13H16O2	3	1563240-86-7	1.61368e+06	1.48947e+06	1.87278e+06	482604	482589	522630	1.27336	0.00858401	0.0338311	3.34443	1.74176	up
MWSHY0196	Genkwanin (Apigenin 7-methyl ether)*	Flavonoids	Flavones	C16H12O5	1	437-64-9	1.19167e+06	1.35825e+06	1.26161e+06	438833	459844	379956	1.27252	0.000649821	0.00758754	2.98094	1.57577	up
Zapp009018	2',6'-dimethoxy-4,4'-di-hydroxychalcone*	Flavonoids	Chalcones	C17H16O5	3	123316-64-3	82587.2	73596.4	78790.2	480551	534091	445015	1.27963	0.00370853	0.0195427	0.160979	-2.63506	down
Wagp009413	5,7-Dihydroxy-3,4',6,8-tetramethoxyflavone*	Flavonoids	Flavonols	C19H18O8	1	50461-86-4	107037	101402	67487.7	219844	161504	206147	1.16844	0.0111185	0.0392206	0.469667	-1.09029	down
Wagp006988	4'-Hydroxy-5,6,7,8-Tetramethoxyflavone	Flavonoids	Flavones	C19H18O7	3	36950-98-8	161043	146809	107563	380667	381199	292663	1.22127	0.00721149	0.0298528	0.393935	-1.34397	down
Wcop004647	6a-methyl-10-methylene-5,11-dioxododecahydro-9H-9,11a-methanonaphtho[1',2':1,7]cyclohepta[1,2-b]oxirene-3-carboxylic acid	Terpenoids	Ditepenoids	C19H22O5	3	-	1.61997e+06	2.35433e+06	1.36474e+06	5.48431e+06	2.74506e+06	4.27268e+06	1.09083	0.080449	0.151023	0.427053	-1.22751	down
Lhhp102904	Horsfieldin*	Lignans and Coumarins	Lignans	C20H20O6	3	-	1.47033e+06	1.4233e+06	1.2573e+06	433925	657766	665384	1.21464	0.00146779	0.0111499	2.36241	1.24026	up
Wbwp006397	(3r,4r)-3-(2h-1,3-benzodioxol-5-ylmethyl)-4-[(4-hydroxy-3-methoxyphenyl)methyl]oxolan-2-one*	Lignans and Coumarins	Lignans	C20H20O6	3	-	1.47033e+06	1.4233e+06	1.2573e+06	433925	657766	665384	1.21464	0.00146779	0.0111499	2.36241	1.24026	up
MW0011974	10S,17S-dihydroxy-4Z,7Z,11E,13Z,15E,19Z-docosahexaenoic acid	Lipids	Free fatty acids	C22H32O4	3	871826-47-0	956592	853577	728726	284738	247633	184868	1.24856	0.00480348	0.0227942	3.53982	1.82368	up
Yxxp005044	Balanophonin	Lignans and Coumarins	Lignans	C20H20O6	3	118916-57-7	1.06703e+07	1.25274e+07	1.12075e+07	2.45998e+06	2.47067e+06	3.5697e+06	1.26077	0.000443872	0.00609296	4.0475	2.01703	up
MWS5164	N,N'-Dimethylarginine;SDMA*	Amino acids and derivatives	Amino acids and derivatives	C8H18N4O2	1	30344-00-4	2.91224e+07	3.07154e+07	2.97659e+07	1.04696e+07	1.08739e+07	1.04821e+07	1.28162	0.000235031	0.00402462	2.81545	1.49337	up
MWSmce208	Norharmane; Beta-Carboline	Alkaloids	Plumerane	C11H8N2	3	244-63-3	156616	156616	156616	1.41364e+06	1.87762e+06	1.5918e+06	1.27945	0.00833339	0.0333087	0.0962202	-3.37752	down
MWS20201	1-O-Galloyl-beta-D-glucose	Phenolic acids	Phenolic acids	C13H16O10	3	58511-73-2	829880	782379	685149	108555	94346.8	132644	1.27384	0.00259562	0.0156469	6.84678	2.77543	up
pma3724	1-O-Feruloylquinic acid	Phenolic acids	Phenolic acids	C17H20O9	3	-	69599.2	54770.6	93550.4	167895	144259	204193	1.18213	0.0126841	0.0424919	0.422042	-1.24454	down
Zbsp003971	Chrysoeriol-6-C-glucoside-7-O-glucoside	Flavonoids	Flavones	C28H32O16	3	-	25838.4	25838.4	25838.4	197081	185787	211020	1.28171	0.00179256	0.0126795	0.130522	-2.93764	down
pmp001267	2-(Dodecylamino)-3-phenyl-1-propanol	Alkaloids	Alkaloids	C21H37NO	3	-	1.64227e+06	4.25372e+06	2.92469e+06	8.33687e+06	6.54708e+06	5.73456e+06	1.07295	0.0217367	0.0596021	0.427804	-1.22498	down
Lmxp006440	2-Palmitoylglycerol	Lipids	Glycerol ester	C19H38O4	3	23470-00-0	217975	198728	171948	13602.7	13602.7	13602.7	1.28088	0.00529874	0.0244037	14.4249	3.85049	up
MWS2085	Ethyl isobutyrate*	Organic acids	Organic acids	C6H12O2	3	97-62-1	59344	50125.2	67001.5	6619.13	6619.13	6619.13	1.27869	0.00862089	0.0339289	8.88691	3.15168	up
Lajp007436	Imbricasin A*	Terpenoids	Ditepenoids	C20H30O3	3	-	140075	140075	140075	2.20448e+06	3.37683e+06	2.80332e+06	1.27825	0.0158674	0.0487988	0.0501187	-4.31851	down
Lmyp008134	5-Hydroxy-2-methyl anthraquinone	Quinones	Anthraquinone	C15H10O3	3	68963-22-4	498928	349242	187814	37562.9	37562.9	37562.9	1.23946	0.0756553	0.14482	9.19334	3.20059	up
Lajp009638	7-Methoxy-8-(3-methylbuta-1,3-dien-1-yl)-2H-chromen-2-one	Lignans and Coumarins	Coumarins	C15H14O3	3	112667-50-2	71709.4	71709.4	71709.4	779398	636995	803546	1.28001	0.00599171	0.026386	0.0969072	-3.36725	down
Smjp001498	Hypaphorine	Alkaloids	Plumerane	C14H18N2O2	3	487-58-1	51282.1	79316.1	32867.1	6573.42	6573.42	6573.42	1.2451	0.0710679	0.139362	8.28921	3.05123	up
Safp009309	N-hexanoylsphinganine	Lipids	Free fatty acids	C24H49NO3	1	-	26721.8	28854.2	41238.9	5344.36	5344.36	5344.36	1.26823	0.0271045	0.0706877	6.03844	2.59418	up
Wayp001104	N-(1-Deoxy-1-fructosyl)Tyrosine	Amino acids and derivatives	Amino acids and derivatives	C15H21NO8	2	-	372114	522663	311018	62203.6	62203.6	62203.6	1.26556	0.0326016	0.0797747	6.46154	2.69188	up
Lmjp007881	Artemisinate*	Terpenoids	Sesquiterpenoids	C15H22O2	3	80286-58-4	696162	757189	557828	214697	220704	185770	1.26223	0.0135511	0.0443921	3.23772	1.69498	up
pmp000234	Salcolin A*	Flavonoids	Flavones	C27H26O11	3	369390-51-2	501637	544352	534006	152196	220057	247109	1.22502	0.00261648	0.0156626	2.55101	1.35107	up
Lajp002810	Procyanidin A4	Tannins	Proanthocyanidins	C30H24O13	2	111466-29-6	1.07849e+06	1.71896e+06	1.55086e+06	215697	215697	215697	1.26842	0.0233067	0.0627876	6.71976	2.74841	up
Lmdp006732	Scutellarein-4'-methyl ether (5,6,7-Trihydroxy-4'-methoxyflavone)*	Flavonoids	Flavones	C16H12O6	3	6563-66-2	1.12687e+06	1.15901e+06	1.16302e+06	240345	273976	141242	1.24735	0.000896768	0.00880893	5.26097	2.39533	up
Zahp001902	Delphinidin-3-O-sambubioside	Flavonoids	Anthocyanidins	C26H29O16+	3	53158-73-9	68163.2	62159	66671	168055	216783	237496	1.2606	0.0197757	0.056041	0.316539	-1.65954	down
Lmbp002255	Fraxetin-8-O-glucoside (Fraxin)	Lignans and Coumarins	Coumarins	C16H18O10	3	524-30-1	426103	493848	199637	39927.4	39927.4	39927.4	1.24174	0.064436	0.128964	9.34686	3.22448	up
Lmbp002309	Sinapaldehyde-4-O-Glucoside	Others	Aldehyde compounds	C17H22O9	2	154461-65-1	426103	493848	199637	39927.4	39927.4	39927.4	1.24174	0.064436	0.128964	9.34686	3.22448	up
Zblp007216	3,4-Dihydroxy-5,4'-dimethoxybibenzyl*	Others	Stilbene	C16H18O4	3	-	1.92353e+06	1.86276e+06	2.01805e+06	849558	853831	958405	1.27384	7.84206e-05	0.00218491	2.18061	1.12473	up
Lmqp007185	Kaempferol-3-O-(4''-O-p-Coumaroyl)rhamnoside*	Flavonoids	Flavonols	C30H26O12	2	-	110420	53269.9	87046.2	2185.29	2185.29	2185.29	1.27348	0.0391171	0.0895652	38.2461	5.25724	up
HJAP005	Laricitrin-3-O-glucoside*	Flavonoids	Flavonols	C22H22O13	1	39986-90-8	89436.9	89436.9	89436.9	1.35277e+06	1.23232e+06	1.50133e+06	1.28141	0.00371591	0.019545	0.0656591	-3.92886	down
Lasp003143	1,4-Benzodioxin-6-propanol	Lignans and Coumarins	Lignans	C11H12O3	3	-	64144.2	64144.2	64144.2	320721	373169	322031	1.28033	0.00393427	0.0204114	0.189417	-2.40036	down
Wbtp005510	Methyl 8-hydroxy-2-methoxy-6-methyl-9-oxoxanthene-1-carboxylate	Others	Xanthone	C17H14O6	3	-	6.02362e+07	5.8139e+07	7.71566e+07	6.25043e+06	6.25043e+06	6.25043e+06	1.2788	0.0102768	0.0373967	10.4276	3.38234	up
MWS4525	6-O-methylguanine	Nucleotides and derivatives	Nucleotides and derivatives	C6H7N5O	3	20535-83-5	353254	329574	362232	155192	152992	165282	1.277	0.000832448	0.00854931	2.20726	1.14225	up
Wbmp007855	Oxoflaccidin	Quinones	PhenAnthraquinones	C16H12O5	1	-	1.34616e+06	1.58219e+06	1.47334e+06	335393	269063	265664	1.27502	0.00148957	0.0111499	5.0587	2.33877	up
pme1119	Inosine	Nucleotides and derivatives	Nucleotides and derivatives	C10H12N4O5	3	58-63-9	137436	154684	189170	293788	353991	326507	1.22771	0.00220966	0.0141605	0.493993	-1.01744	down
Qmjp080407	14(15)-Bisnor-13-oxolabd-8(17),11(E)-dien-19-oic acid	Terpenoids	Sesquiterpenoids	C18H26O3	3	-	238866	196110	195102	18678.9	18678.9	18678.9	1.28063	0.00563348	0.0254456	11.244	3.49109	up
Jmcp004706	pterodontoside E	Terpenoids	Sesquiterpenoids	C21H38O8	3	-	11128.6	11128.6	11128.6	115158	91530.7	121120	1.27884	0.00836899	0.0333102	0.101846	-3.29554	down
Lmmp003109	3'-O-Methyl-epicatechin	Flavonoids	Flavanols	C16H16O6	2	76549-34-3	899410	840952	948642	7.5693e+06	7.21751e+06	5.88929e+06	1.27823	0.00703567	0.0296301	0.130054	-2.94282	down
mws0124	N-(3-Indolylacetyl)-L-alanine	Amino acids and derivatives	Amino acids and derivatives	C13H14N2O3	3	57105-39-2	4341.9	4341.9	4341.9	142311	91258.3	184790	1.27331	0.0377915	0.0873849	0.0311352	-5.00531	down
Safp008433	Dichotosin	Flavonoids	Flavones	C23H28O9	3	-	557195	557195	557195	3.75509e+06	4.30972e+06	2.78598e+06	1.27047	0.0205269	0.0573021	0.154052	-2.69851	down
MWStz411	(-)-Isolariciresinol 9'-O-glucoside	Lignans and Coumarins	Lignans	C26H34O11	1	143236-04-8	82714.8	144224	76864.9	310226	156515	202531	1.04413	0.0988036	0.175964	0.453932	-1.13945	down
Lmjp101403	3ξ-(1ξ-Hydroxyethyl)-7-hydroxy-1-isobenzofuranone	Others	Others	C10H10O4	3	-	160718	109670	213800	21934.1	21934.1	21934.1	1.25811	0.0434572	0.0966934	7.35825	2.87936	up
Laxp009625	(Z)-4,6-Dihydroxy-2-(4-Hydroxy-3-Methoxybenzylidene)-7-Methylbenzofuran-3(2h)-One	Flavonoids	Aurones	C17H14O6	3	-	3.81145e+06	3.81494e+06	4.20696e+06	1.3702e+06	1.23564e+06	1.41618e+06	1.27656	0.000705956	0.00779079	2.94215	1.55687	up
MWSHC2083	1,6-Dihydroxy-4(14)-eudesmene	Terpenoids	Sesquiterpenoids	C15H26O2	3	70389-88-7	15648.6	15648.6	15648.6	158613	78243.1	262694	1.22397	0.10575	0.185178	0.0939762	-3.41156	down
Zjtp092402	3,4'-dihydroxy-5-methoxybibenzyl	Others	Stilbene	C15H16O3	3	67884-29-1	1.61652e+06	1.64546e+06	1.6931e+06	432077	439533	289542	1.2607	0.000262776	0.00432428	4.26737	2.09335	up
Lmsp004137	Eriodictyol chalcone	Flavonoids	Chalcones	C15H12O6	3	73692-51-0	1.37109e+07	1.93642e+07	1.29492e+07	1.8798e+07	4.16598e+07	3.36324e+07	1.0053	0.12951	0.213752	0.489151	-1.03165	down
Yamp012546	(6S,6aS)-9,11-diphenoxy-6,6a-diphenyl-2,3,5,5a,6,6a,11b,11c,12,12a-decahydro-1H-benzofuro[2',3':4,5]cyclopenta[1,2-d]pyrrolo[1,2-a]pyrimidin-5-ol	Alkaloids	Alkaloids	C40H36N2O4	3	-	15692.3	15692.3	15692.3	204908	142306	136440	1.2746	0.021926	0.0598446	0.097336	-3.36088	down
Hmyp008708	Izalpinin*	Flavonoids	Flavonols	C16H12O5	1	480-14-8	1.27845e+06	1.41299e+06	1.55125e+06	197490	424663	345587	1.22517	0.000519269	0.00667225	4.38413	2.13229	up
MEDP1341	1-(9Z,12Z-octadecadienoyl)-sn-glycero-3-phosphocholine	Lipids	LPC	C26H50NO7P	3	22252-07-9	1.20332e+06	1.07495e+06	1.30763e+06	2.65403e+06	2.25529e+06	2.48115e+06	1.25673	0.00184752	0.0129005	0.485206	-1.04333	down
Lmsp011053	7-Hydroxy-2',5,8-Trimethoxyflavanone*	Flavonoids	Flavanones	C18H18O6	3	-	184440	184440	184440	933432	1.13453e+06	922201	1.27858	0.00713443	0.0297393	0.185047	-2.43403	down
pmp000235	Salcolin B*	Flavonoids	Flavones	C27H26O11	3	-	562144	494813	532519	125647	211792	161613	1.24011	0.000450642	0.00612612	3.18499	1.67129	up
Lsj214143	Soranjidiol; 1,6-Dihydroxy-2-methyl-9,10-anthraquinone	Quinones	Anthraquinone	C15H10O4	2	518-73-0	8.73391e+06	8.99307e+06	9.172e+06	2.00147e+06	2.44774e+06	2.11915e+06	1.27765	3.35278e-06	0.00060147	4.09523	2.03395	up
Lmhp010162	LysoPE 17:0	Lipids	LPE	C22H46NO7P	3	-	26602	34382.3	83237.6	160102	161468	90662	1.05556	0.0418939	0.0946904	0.349857	-1.51516	down
Zblp001862	Delphinidin-3-O-galactoside	Flavonoids	Anthocyanidins	C21H21O12+	2	28500-00-7	59378.7	59378.7	59378.7	296893	347712	348397	1.28016	0.00391935	0.0203864	0.179391	-2.47882	down
Hmqp001042	Butyl beta-D-glucoside	Others	Saccharides	C10H20O6	3	5391-18-4	4431.72	4431.72	4431.72	44819.8	22158.6	38055.4	1.25494	0.0450093	0.0989501	0.12658	-2.98188	down
Lcsp003681	Val-Val-Leu	Amino acids and derivatives	Amino acids and derivatives	C16H31N3O4	3	-	43833.6	51634.7	63329.5	2702.76	2702.76	2702.76	1.27924	0.0124831	0.0421698	19.5847	4.29165	up
Zmgp002799	5-hydroxy-1-(4-hydroxyphenyl)-7-(4-hydroxy-3-methoxyphenyl)-3-heptanone	Others	Ketone compounds	C20H24O5	3	-	554760	747020	879259	200536	436372	389083	1.04939	0.0346568	0.082438	2.12579	1.088	up
Wcjp001256	9-Alpha-Ribofuranosyladenine*	Nucleotides and derivatives	Nucleotides and derivatives	C10H13N5O4	1	-	538034	751450	545254	104455	104455	104455	1.27285	0.018508	0.0533623	5.85494	2.54965	up
Zbkp001454	Miserotoxin	Alkaloids	Alkaloids	C9H17NO8	3	24502-76-9	538034	751450	545254	104455	104455	104455	1.27285	0.018508	0.0533623	5.85494	2.54965	up
Zmsp001773	9-Arabinosyladenine*	Nucleotides and derivatives	Nucleotides and derivatives	C10H13N5O4	1	-	538034	751450	545254	104455	104455	104455	1.27285	0.018508	0.0533623	5.85494	2.54965	up
Lacp001431	N-(3-hydroxy-4-methoxyphenethyl)-4-hydroxybutanamide	Alkaloids	Alkaloids	C14H21NO4	3	-	538034	751450	545254	104455	104455	104455	1.27285	0.018508	0.0533623	5.85494	2.54965	up
pma0948	Phenylethanolamine	Alkaloids	Alkaloids	C8H11NO	3	7568-93-6	364047	443947	435094	101213	105643	88774.9	1.27425	0.00492583	0.0231794	4.20486	2.07206	up
Wadp007734	7-Oxo-2-hydroxy-6,18-epoxypimara-15-en-18-one	Terpenoids	Ditepenoids	C20H28O4	3	-	99970	99970	99970	4.02792e+06	3.6657e+06	3.47484e+06	1.2822	0.0019983	0.0133568	0.0268533	-5.21876	down
Smmp008919	Epirosmanol	Terpenoids	Ditepenoids	C20H26O5	3	-	515385	515385	515385	3.03384e+06	2.57693e+06	2.62343e+06	1.28009	0.00421383	0.0211368	0.187773	-2.41294	down
Zbnp004170	Eriodictyol-3'-O-glucoside*	Flavonoids	Flavanones	C21H22O11	2	-	5.14251e+06	4.03237e+06	5.34247e+06	588161	588161	588161	1.27801	0.00906381	0.0349871	8.22755	3.04046	up
zjbp111502	Ciwujiatone	Lignans and Coumarins	Lignans	C22H26O9	3	-	100236	108002	115834	5672.23	5672.23	5672.23	1.28204	0.00192982	0.0131778	19.0444	4.25129	up
Walp003622	6-beta-d-glucopyranosyloxyindole-3-carboxylic acid	Alkaloids	Plumerane	C15H17NO8	3	-	358542	303016	428906	936629	1.1211e+06	1.24456e+06	1.24893	0.00715222	0.0297393	0.330214	-1.59853	down
Lhnp111728	Massoniresinol; Vladinol A	Lignans and Coumarins	Lignans	C20H24O8	2	96087-10-4	7020.29	7020.29	7020.29	41846.1	68393.7	40190.8	1.26319	0.0420853	0.0949807	0.140004	-2.83646	down
pmp000608	Aurantio-obtusin beta-D-glucoside	Quinones	Anthraquinone	C23H24O12	1	129025-96-3	115755	131139	196716	85956.7	52714	39556.4	1.10369	0.0497986	0.106565	2.48902	1.31558	up
Lcyp000678	Prudomenin*	Flavonoids	Flavonols	C23H24O12	3	-	115755	131139	196716	85956.7	52714	39556.4	1.10369	0.0497986	0.106565	2.48902	1.31558	up
Zmdp002216	γ-Glu-Leu	Amino acids and derivatives	Amino acids and derivatives	C11H20N2O5	3	2566-39-4	155858	167591	153370	68651.3	70190.2	94924.2	1.22911	0.00350339	0.0187069	2.03973	1.02838	up
HX1373	threo-guaiacylglycerol-β-coniferyl ether	Lignans and Coumarins	Lignans	C20H24O7	3	-	104827	169662	139192	14337.3	14337.3	14337.3	1.27279	0.0222117	0.0603902	9.61779	3.26571	up
Lazp010816	Fleuryinol B	Terpenoids	Ditepenoids	C20H30O2	3	-	637114	626169	623738	64759.5	64759.5	64759.5	1.28255	5.31525e-05	0.00175946	9.71296	3.27991	up
Lmmp004504	2'-Hydroxygenistein	Flavonoids	Isoflavones	C15H10O6	3	1156-78-1	69172.6	69172.6	69172.6	484785	345863	379856	1.27413	0.0152813	0.0475869	0.171431	-2.5443	down
mws0103	Indole-3-carboxaldehyde	Alkaloids	Plumerane	C9H7NO	3	487-89-8	225659	305097	262478	94947.2	128225	165650	1.14706	0.0121605	0.0415287	2.04009	1.02863	up
Lajp004391	Paniculin	Lignans and Coumarins	Coumarins	C15H16O5	3	-	32081.7	32081.7	32081.7	200307	160409	659978	1.18748	0.194475	0.290473	0.094294	-3.40669	down
Zmcp102202	Senkyunolide C*	Others	Lactones	C12H12O3	2	-	2.04452e+06	6.75156e+06	2.12809e+06	408905	408905	408905	1.19616	0.173239	0.265376	8.90523	3.15465	up
WaTKp05402	3-Ethynylbenzaldehyde	Others	Aldehyde compounds	C9H6O	3	77123-56-9	4.69736e+06	4.69736e+06	4.69736e+06	2.40803e+07	2.39662e+07	2.34868e+07	1.28252	9.01655e-05	0.00232776	0.197	-2.34373	down
pmf0472	Apigenin 7-O-[beta-D-apiosyl-(1→2)-beta-D-glucoside]	Flavonoids	Flavones	C26H28O14	3	26544-34-3	4901.53	4901.53	4901.53	24507.7	43807.4	42639.6	1.26002	0.0358921	0.0846609	0.132528	-2.91563	down
Lmtp005493	4,4'-Dihydroxy-3,5-dimethoxybibenzyl	Others	Stilbene	C16H18O4	3	39499-96-2	943958	851458	889360	70805.8	70805.8	70805.8	1.28221	0.00105956	0.00928849	12.6392	3.65983	up
Lcfp039656	Homophthalicacid	Phenolic acids	Phenolic acids	C9H8O4	1	89-51-0	842662	901553	963379	168532	168532	168532	1.28119	0.00224691	0.0142405	5.35524	2.42095	up
Qmxp101531	Inflexarabdonin J*	Terpenoids	Ditepenoids	C20H30O3	3	-	227012	227012	227012	2.43312e+06	1.821e+06	2.35826e+06	1.2783	0.00937388	0.0357337	0.102994	-3.27937	down
Lhmp101304	Ranunculinin glucoside*	Others	Others	C11H16O8	3	-	1.46686e+06	1.38994e+06	1.38901e+06	456345	493994	418233	1.27728	1.16634e-05	0.000949517	3.10236	1.63337	up
HX1346	ranunculin*	Others	Others	C11H16O8	3	-	1.46686e+06	1.38994e+06	1.38901e+06	456345	493994	418233	1.27728	1.16634e-05	0.000949517	3.10236	1.63337	up
Zmlp007578	3,4,3'-Tri-O-methylellagic acid	Tannins	Tannin	C17H12O8	3	1617-49-8	28286.8	28286.8	28286.8	236268	184077	141434	1.26674	0.02849	0.0731823	0.151057	-2.72684	down
Lmpp003789	Cyanidin 3-O-(6-O-p-coumaroyl)glucoside	Flavonoids	Anthocyanidins	C30H27O13+	3	-	50287.3	50287.3	50287.3	498876	397388	358730	1.27711	0.0126486	0.0424232	0.120209	-3.05638	down
MWSHY0080	Scolymoside*	Flavonoids	Flavones	C27H30O15	3	25694-72-8	50287.3	50287.3	50287.3	498876	397388	358730	1.27711	0.0126486	0.0424232	0.120209	-3.05638	down
Wazcp04835	Phycoerythrobilin	Others	Others	C33H38N4O6	2	18097-67-1	2.23631e+06	1.75686e+06	1.82237e+06	201169	265156	314814	1.26852	0.00595263	0.0262962	7.44495	2.89626	up
Rfp165621	Solavetivone	Alkaloids	Alkaloids	C15H22O1	3	54878-25-0	2.33195e+06	1.5773e+06	2.07145e+06	1.03973e+06	859838	1.01002e+06	1.20453	0.036972	0.0859404	2.05551	1.0395	up
Lmcp101902	Desrhamnosylacteoside	Phenolic acids	Phenolic acids	C23H26O11	2	-	40516.3	40516.3	40516.3	359562	236019	228395	1.26747	0.0314155	0.0777134	0.147515	-2.76106	down
Lmcp101903	Desrhamnosylisoacteoside	Phenolic acids	Phenolic acids	C23H26O11	3	-	40516.3	40516.3	40516.3	359562	236019	228395	1.26747	0.0314155	0.0777134	0.147515	-2.76106	down
Hmcp001105	5-(2-Hydroxypropyl)hygrine	Alkaloids	Pyrrole alkaloids	C11H21NO2	3	-	26908.5	26908.5	26908.5	167308	310786	134543	1.24281	0.0818886	0.152909	0.131767	-2.92393	down
pme2596	4-Pyridoxate	Others	Vitamin	C8H9NO4	3	82-82-6	60090.4	97277.3	66595.5	12018.1	12018.1	12018.1	1.26611	0.0319157	0.0785058	6.21184	2.63502	up
Wmcp000010	Sammangaoside A	Others	Others	C19H32O8	3	-	409945	354627	267043	84443.6	169610	142498	1.148	0.0184811	0.0533623	2.60146	1.37932	up
Wbmp003788	3,4-Dihydroxy-7,8-dihydro-β-ionone-4-O-β-D-glucoside*	Terpenoids	Sesquiterpenoids	C19H32O8	1	-	409945	354627	267043	84443.6	169610	142498	1.148	0.0184811	0.0533623	2.60146	1.37932	up
mws1565	Geniposide	Terpenoids	Monoterpenoids	C17H24O10	3	24512-63-8	409945	354627	267043	84443.6	169610	142498	1.148	0.0184811	0.0533623	2.60146	1.37932	up
Wbmp003419	Dihydrovomifoliol-O-β-D-glucoside*	Terpenoids	Sesquiterpenoids	C19H32O8	1	-	409945	354627	267043	84443.6	169610	142498	1.148	0.0184811	0.0533623	2.60146	1.37932	up
Sahp003947	Staphylionoside A	Terpenoids	Sesquiterpenoids	C19H30O8	3	-	41259.7	41259.7	41259.7	493700	570874	684472	1.27929	0.0102977	0.0373967	0.0707695	-3.82073	down
Sazp010564	6-methoxy-1,1,4a,7-tetramethyl-2,3,4,10a-tetrahydrophenanthren-2-ol	Terpenoids	Ditepenoids	C19H26O2	3	-	4.56925e+07	4.18644e+07	4.45951e+07	1.46219e+07	1.56306e+07	1.41635e+07	1.27922	0.000431365	0.00603466	2.97533	1.57305	up
Qmdp112509	Abietatrien-3β-ol	Terpenoids	Ditepenoids	C20H30O	3	-	4.37831e+07	4.27729e+07	4.56597e+07	1.62356e+07	1.6234e+07	1.63838e+07	1.28157	0.000892734	0.00880893	2.70638	1.43636	up
pmp000570	Odoricarpan	Flavonoids	Isoflavones	C18H18O6	3	-	162035	131111	109113	21822.6	21822.6	21822.6	1.27244	0.0181857	0.053176	6.14437	2.61927	up
MWSCX022	Polylauioid I	Terpenoids	Ditepenoids	C20H28O5	3	-	758215	850662	674928	134986	134986	134986	1.27882	0.00650324	0.0278965	5.63963	2.4956	up
Yalp007434	(3R,5R,7R,8R,9R,10S,13S,17R)-17-((3S,6S)-6-hydroxy-7,7-dimethyl-2,3,6,7-tetrahydrooxepin-3-yl)-4,4,8,10,13-pentamethyl-2,3,4,5,6,7,8,9,10,11,12,13,16,17-tetradecahydro-1H-cyclopenta[a]phenanthrene-3,7-diyl diacetate	Steroids	Steroid	C34H52O6	3	-	3791.53	3791.53	3791.53	44222.3	38280.7	64447.8	1.27297	0.0293673	0.0746518	0.0774041	-3.69145	down
Lhfp110801	Ligularone	Terpenoids	Sesquiterpenoids	C15H20O2	3	4234-94-0	557630	607671	661637	84402.7	84402.7	84402.7	1.28095	0.00326139	0.01789	7.21517	2.85103	up
Zblp004882	4'-Hydroxy-3,5-dimethoxydihydrochalcone	Flavonoids	Chalcones	C17H18O4	3	-	218376	218376	218376	1.3071e+06	1.17568e+06	1.09188e+06	1.28014	0.00411655	0.0209605	0.18327	-2.44796	down
pmb2406	LysoPC 17:0*	Lipids	LPC	C25H52NO7P	1	50930-23-9	40523	40523	40523	736363	494020	665892	1.27759	0.0144806	0.0460439	0.0641093	-3.96332	down
MWSHY0123	Wogonin	Flavonoids	Flavones	C16H12O5	2	632-85-9	1.2578e+06	1.18348e+06	1.46057e+06	410312	210514	316292	1.23532	0.00104795	0.00924319	4.16368	2.05786	up
Wayp006636	N-Octanoyl nornicotine	Alkaloids	Pyridine alkaloids	C17H26N2O	3	38854-10-3	780425	977303	1.0227e+06	119101	119101	119101	1.27829	0.00836861	0.0333102	7.78172	2.96009	up
Lmpp003611	Malvidin-3-O-(6''-O-caffeoyl)glucoside	Flavonoids	Anthocyanidins	C32H31O15+	2	-	8993.72	8993.72	8993.72	96651.5	44968.6	63209.3	1.25144	0.059415	0.120805	0.131725	-2.9244	down
Hmcp002399	Limocitrin-3-O-glucoside	Flavonoids	Flavonols	C23H24O13	2	38836-51-0	43969.4	43969.4	43969.4	713407	800730	686544	1.28191	0.00248906	0.015293	0.0599397	-4.06034	down
MWSHY0062	2',4'-Dihydroxy-6'-methoxychalcone; (E)-Cardamonin	Flavonoids	Chalcones	C16H14O4	2	18956-16-6	868762	802946	771799	2.12421e+06	2.33843e+06	2.50841e+06	1.27438	0.00348331	0.0187062	0.350522	-1.51242	down
Yalp012806	Neocembrene	Terpenoids	Ditepenoids	C20H32	3	31570-39-5	1.97713e+06	2.41428e+06	2.07892e+06	395427	395427	395427	1.27941	0.00557467	0.0252611	5.45431	2.4474	up
MWSslk214	Corylin	Flavonoids	Isoflavones	C20H16O4	3	53947-92-5	123472	156982	108265	21652.9	21652.9	21652.9	1.27318	0.0173197	0.0516289	5.98407	2.58113	up
Wbtp006564	4,8,10-trihydroxy-2-methoxy-1h,2h-furo[3,2-a]xanthen-11-one*	Flavonoids	Other Flavonoids	C16H12O7	3	-	2.88274e+06	1.73491e+06	1.59573e+06	141926	141926	141926	1.27025	0.0418935	0.0946904	14.593	3.8672	up
pmp000436	Taraxerol	Terpenoids	Triterpene	C30H50O	3	127-22-0	15352	15352	15352	116976	88873.8	222308	1.24343	0.0883998	0.161216	0.107568	-3.21668	down
Wagp010556	2',4'-Dihydroxy-2,3',6'-Trimethoxychalcone*	Flavonoids	Chalcones	C18H18O6	3	100079-39-8	211807	211807	211807	1.16852e+06	1.05903e+06	1.12483e+06	1.28178	0.00123212	0.010138	0.189543	-2.3994	down
Wcop008957	geopyxin B	Terpenoids	Ditepenoids	C20H28O4	3	-	134473	134473	134473	4.99758e+06	4.37927e+06	4.93732e+06	1.28219	0.00179701	0.0126795	0.0281832	-5.14902	down
Zbsp009834	Methyl-[6]-shogaol methoxy	Phenolic acids	Phenolic acids	C19H28O4	3	-	189587	156982	131474	26294.7	26294.7	26294.7	1.27378	0.0156032	0.048401	6.06004	2.59933	up
Lmyp004052	Quercetin-3-O-(6''-O-p-Coumaroyl)galactoside	Flavonoids	Flavonols	C30H26O14	2	-	20785.2	9975.79	15038.5	1995.16	1995.16	1995.16	1.25423	0.0511471	0.108625	7.65177	2.93579	up
mws1500	Ethyl cinnamate	Phenolic acids	Phenolic acids	C11H12O2	3	103-36-6	89041.8	89041.8	89041.8	480957	445209	517169	1.28084	0.00279547	0.0162922	0.185075	-2.43382	down
Qacp006433	1,3-Dihydroxy-2-methoxyxanthone-glucoside	Others	Xanthone	C20H20O10	3	-	30935.5	30935.5	30935.5	154678	210390	214003	1.27409	0.0137447	0.0445271	0.160268	-2.64144	down
Wbtp005759	1,2,5,7,8-pentahydroxy-3-methylanthracene-9,10-dione	Quinones	Quinones	C15H10O7	1	-	1.66146e+07	2.20087e+07	1.83077e+07	3.32291e+06	3.32291e+06	3.32291e+06	1.27688	0.0101939	0.0373311	5.71096	2.51373	up
Lhpp101822	Veronicoside	Terpenoids	Monoterpenoids	C22H26O11	3	50981-09-4	11219.2	11219.2	11219.2	56096.8	56095.8	60923.9	1.28183	0.00119615	0.0100177	0.194421	-2.36274	down
pmp001164	Iristectorin B	Flavonoids	Isoflavones	C23H24O12	3	94396-09-5	267368	279159	203945	116461	101946	83388.6	1.22753	0.013456	0.0442701	2.48668	1.31422	up
pmp001125	Dendrobin A	Phenolic acids	Phenolic acids	C16H18O4	3	-	1.40387e+06	1.38397e+06	1.45734e+06	628654	700784	790499	1.25895	0.00111772	0.00964801	2.0025	1.0018	up
Sayp005415	Neocurdione	Terpenoids	Sesquiterpenoids	C15H24O2	3	108944-67-8	8565.57	8565.57	8565.57	77868.8	70123	46915	1.26764	0.0261248	0.0685399	0.131841	-2.92313	down
pmb0864	LysoPE 14:0	Lipids	LPE	C19H40NO7P	3	-	1142.53	1142.53	1142.53	10558.2	5712.67	10952.3	1.25553	0.042273	0.0952407	0.125907	-2.98957	down
Waptp03252	Procyanidin B7	Tannins	Proanthocyanidins	C30H26O12	1	-	13378.9	13378.9	13378.9	119468	199787	223774	1.26838	0.0336261	0.0812893	0.0739124	-3.75804	down
pmb0108	Feruloyl syringic acid	Phenolic acids	Phenolic acids	C19H18O8	3	-	58509.2	58509.2	58509.2	294656	292546	333022	1.28089	0.00279642	0.0162922	0.190744	-2.39029	down
pme2527	L-Ornithine	Amino acids and derivatives	Amino acids and derivatives	C5H12N2O2	3	348-66-3	4.65102e+06	4.76809e+06	4.96726e+06	255230	271157	190657	1.27908	0.000179236	0.00350257	20.0635	4.3265	up
Lhfp112915	Dihydrojuglone	Quinones	Quinones	C10H8O3	3	-	6.41422e+06	7.51286e+06	6.54901e+06	2.79522e+06	2.61595e+06	2.9219e+06	1.27174	0.00486729	0.0229856	2.45721	1.29702	up
Zbsp004455	Tricin-5,7-O-diglucoside	Flavonoids	Flavones	C29H34O17	1	-	28743.7	68353.9	96117.1	2554.84	2554.84	2554.84	1.24962	0.0870537	0.159485	25.2089	4.65586	up
MWStz170	Cyclo(L-Leu-trans-4-hydroxy-L-Pro)	Amino acids and derivatives	Amino acids and derivatives	C11H18N2O3	3	115006-86-5	219.38	219.38	219.38	22235.8	1096.9	9778.09	1.12913	0.219894	0.318245	0.0198769	-5.65276	down
Lazp002953	Nagilactone C diglucoside	Terpenoids	Ditepenoids	C31H42O17	3	-	1774.2	1774.2	1774.2	13426.4	28878.3	8871	1.22077	0.127567	0.212155	0.104006	-3.26526	down
WaTKp17885	2-[4-(2-Methylpropenyl)phenyl]propionic Acid	Phenolic acids	Phenolic acids	C13H16O2	3	75625-99-9	117546	117546	117546	686591	639085	587731	1.28076	0.00299703	0.0168673	0.184299	-2.43988	down
Lssp210422	Genistein*	Flavonoids	Isoflavones	C15H10O5	3	446-72-0	1.79315e+06	2.3097e+06	2.25406e+06	417226	435391	395005	1.27551	0.00884724	0.0345538	5.09522	2.34914	up
pmb0296	1-Oleoyl-Sn-Glycerol	Lipids	Glycerol ester	C21H40O4	3	129784-87-8	44015.7	30664.2	8213.59	1642.72	1642.72	1642.72	1.19469	0.130637	0.215104	16.8204	4.07214	up
Lahp003599	Homoeriodictyol-7,4'-di-O-β-D-glucopyranoside	Flavonoids	Flavanones	C28H34O16	3	-	77546.5	81693.4	54152.8	10830.6	10830.6	10830.6	1.27056	0.01962	0.055712	6.56761	2.71537	up
Zjyp110101	Nootkatone	Terpenoids	Sesquiterpenoids	C15H22O	1	4674-50-4	780836	747655	869475	2.99118e+06	2.70545e+06	3.00014e+06	1.27773	0.000683144	0.00770783	0.275731	-1.85867	down
pme2836	5-Hydroxytryptophol	Alkaloids	Plumerane	C10H11NO2	3	154-02-9	44161	44161	44161	329297	430062	390370	1.27927	0.00738703	0.0303905	0.11523	-3.11742	down
Cmsp006710	3',4-Dihydroxy-3,5'-dimethoxybibenzyl*	Others	Stilbene	C16H18O4	3	83088-28-2	1.88484e+06	1.85913e+06	2.11051e+06	733169	862007	1.04153e+06	1.23796	0.000914565	0.00887443	2.22038	1.15081	up
MWSslk123	4'-Methoxychalcone	Flavonoids	Chalcones	C16H14O2	3	959-23-9	34258.3	34258.3	34258.3	290372	340865	406578	1.27802	0.0114504	0.0398781	0.0990299	-3.33599	down
pme0152	5,6-Dihydrothymine	Nucleotides and derivatives	Nucleotides and derivatives	C5H8N2O2	3	696-04-8	668103	606003	661353	388138	207376	268730	1.17425	0.012991	0.0432624	2.23948	1.16316	up
Hmcp004650	Hexadecanedioate	Lipids	Free fatty acids	C16H30O4	3	505-54-4	6.08951e+07	5.703e+07	5.63068e+07	2.6703e+07	2.82447e+07	3.06242e+07	1.27175	0.000116522	0.00273243	2.03609	1.0258	up
Lmhp008233	LysoPE 18:4	Lipids	LPE	C23H40NO7P	3	-	1123.29	1123.29	1123.29	23293.5	67008.8	43694.9	1.26439	0.0748039	0.14398	0.0251488	-5.31337	down
pme0033	Hypoxanthine	Nucleotides and derivatives	Nucleotides and derivatives	C5H4N4O	3	68-94-0	1.39531e+06	1.83147e+06	1.50439e+06	265645	246050	397147	1.25707	0.00541149	0.0246008	5.20572	2.3801	up
MWS0686	5,6-Dihydroxyindole-2-carboxylate	Alkaloids	Plumerane	C9H7NO4	3	4790-08-3	5227.84	5227.84	5227.84	65944.7	50915.4	26139.2	1.24208	0.0673155	0.13387	0.109676	-3.18869	down
Zmmp002167	L-Glutamyl-L-Tyrosine	Amino acids and derivatives	Amino acids and derivatives	C14H18N2O6	3	-	1.37869e+06	1.26253e+06	1.36909e+06	231312	200710	286296	1.27293	4.85129e-05	0.00167836	5.58292	2.48102	up
MWSslk197	Secoxyloganin	Terpenoids	Monoterpenoids	C17H24O11	3	58822-47-2	6066.72	6066.72	6066.72	75785.9	54341.7	61736	1.27816	0.0115981	0.0402792	0.0948599	-3.39806	down
WaXYp03037	2,3-Dihydroxy-3,7-dimethyl-6-octenyl β-D-glucopyranoside	Terpenoids	Monoterpenoids	C16H30O8	1	-	2819.47	2819.47	2819.47	27740.3	18087.2	70815.5	1.2184	0.156064	0.246373	0.0725154	-3.78557	down
WaYp007725	2-O-(Feruloyl) Dihydroxyacetophenone	Others	Ketone compounds	C18H16O6	3	-	757231	655229	380275	76055	76055	76055	1.25595	0.043569	0.0967666	7.85719	2.97401	up
Ydyp005399	Cernuoside*	Flavonoids	Aurones	C21H20O11	1	480-69-3	215417	517836	336881	6588.95	6588.95	6588.95	1.27211	0.0575879	0.118286	54.1378	5.75856	up
Hmcp002316	Isorhamnetin-3-O-arabinoside*	Flavonoids	Flavonols	C21H20O11	1	-	215417	517836	336881	6588.95	6588.95	6588.95	1.27211	0.0575879	0.118286	54.1378	5.75856	up
Wahlp01697	Methyl 3-oxo-2-phenylpropanoate	Phenolic acids	Phenolic acids	C10H10O3	1	5894-79-1	14828	5138.36	11560.9	1027.67	1027.67	1027.67	1.23275	0.079511	0.149762	10.2261	3.35419	up
Yamp001634	dehydroconiferyl alcohol	Others	Others	C10H10O3	3	-	14828	5138.36	11560.9	1027.67	1027.67	1027.67	1.23275	0.079511	0.149762	10.2261	3.35419	up
pmp001257	Tridecanoylglycine	Amino acids and derivatives	Amino acids and derivatives	C15H29NO3	3	-	903324	522969	1.17047e+06	104594	104594	104594	1.24959	0.0558852	0.116051	8.2757	3.04888	up
Lmmp003091	Multinoside A*	Flavonoids	Flavonols	C27H30O16	3	59262-54-3	28641	12552	58424.3	2510.39	2510.39	2510.39	1.20226	0.149754	0.238617	13.2273	3.72545	up
MWSslk148	Rutin Trihydrate	Flavonoids	Flavonols	C27H36O19	3	207671-50-9	28641	12552	58424.3	2510.39	2510.39	2510.39	1.20226	0.149754	0.238617	13.2273	3.72545	up
Lmjp101206	Murpaniculol	Lignans and Coumarins	Coumarins	C15H16O5	3	-	683259	747742	906229	89173.3	89173.3	89173.3	1.27873	0.00909443	0.0350572	8.73666	3.12708	up
Zbqp003444	4-amino-5-oxo-5-(pentylamino)pentanoic acid	Amino acids and derivatives	Amino acids and derivatives	C10H20N2O3	2	-	763480	910236	918820	1.13165e+07	1.03367e+07	1.21645e+07	1.28028	0.00237778	0.014738	0.0766623	-3.70534	down
ZbWp003008	N-Ethylphenylalanine	Amino acids and derivatives	Amino acids and derivatives	C11H15NO2	3	-	34759.8	34759.8	34759.8	201591	173799	312268	1.25997	0.0441888	0.0975273	0.151644	-2.72124	down
pma0702	N1,N8-Bis(sinapoyl)spermidine	Alkaloids	Phenolamine	C29H39N3O8	3	-	1698.02	1698.02	1698.02	8490.11	82574.9	66780.2	1.15879	0.15228	0.241425	0.0322725	-4.95355	down
MWSmce572	Cinnamamide	Alkaloids	Alkaloids	C9H9NO	3	22031-64-7	59231.5	41605.8	57885.8	224907	189998	351712	1.23547	0.0523389	0.110655	0.207043	-2.27199	down
Lmhp010757	LysoPE 20:2	Lipids	LPE	C25H48NO7P	3	-	32685.4	43475.4	48867.4	2308.37	2308.37	2308.37	1.27816	0.0142899	0.0458242	18.0543	4.17427	up
Cmbp005523	1,3-O-Dicaffeoylglycerol	Phenolic acids	Phenolic acids	C21H20O9	3	-	8926.87	8926.87	8926.87	59313.6	45914.7	58677.6	1.27701	0.00899342	0.0348108	0.16339	-2.61361	down
Ljmp121502	Mansonone Q	Terpenoids	Sesquiterpenoids	C15H20O4	3	-	173746	224005	230921	14807.5	14807.5	14807.5	1.27959	0.00845024	0.0333975	14.1522	3.82295	up
zjbp111643	neopetasane	Terpenoids	Sesquiterpenoids	C15H22O	3	151282-84-7	310136	376587	436230	935822	1.08835e+06	1.06295e+06	1.25413	0.000541774	0.00680604	0.363753	-1.45897	down
Zjhp090625	7-O-β-D-glucopyranoside-5-hydroxy-3-(4'-hydroxybenzylidene)-chroman-4-one*	Flavonoids	Other Flavonoids	C22H22O10	3	-	606688	808174	663773	94099.1	94099.1	94099.1	1.278	0.00987808	0.0366714	7.36329	2.88035	up
Lamp007163	4'-Demethyleucomin glucoside*	Flavonoids	Other Flavonoids	C22H22O10	3	-	606688	808174	663773	94099.1	94099.1	94099.1	1.278	0.00987808	0.0366714	7.36329	2.88035	up
Smlp005221	Podolactone D	Terpenoids	Ditepenoids	C20H24O7S	3	-	43313.1	90118.8	56557.3	3911.62	3911.62	3911.62	1.26726	0.0508064	0.108314	16.1901	4.01704	up
Lhfp112910	6-hydroxy-isosclerone	Quinones	Quinones	C10H10O4	3	-	12951.1	12951.1	12951.1	175703	149196	64755.3	1.23566	0.0729912	0.141719	0.0997119	-3.32609	down
Hasp013107	Saurufuran B	Terpenoids	Ditepenoids	C20H28O3	3	425368-87-2	2.81399e+06	2.5023e+06	2.4878e+06	747888	171064	740091	1.11709	0.0021556	0.0139126	4.70397	2.23388	up
Zmbp006041	6-methyl luteolin	Flavonoids	Flavones	C16H12O6	3	-	251443	262516	151889	30377.7	30377.7	30377.7	1.2626	0.0321007	0.0788919	7.30631	2.86914	up
MWSslk232	Complanatuside	Flavonoids	Flavonols	C28H32O16	2	116183-66-5	3855.2	3855.2	3855.2	19276	55534.9	21908.1	1.2173	0.135554	0.22113	0.119579	-3.06396	down
MW0106261	Cys-Leu-Lys	Amino acids and derivatives	Amino acids and derivatives	C15H30N4O4S1	3	-	11217.8	15007.1	4082.26	816.452	816.452	816.452	1.21771	0.101213	0.179016	12.3735	3.62919	up
Lmjp005016	Cirsiliol (3',4',5-Trihydroxy-6,7-Dimethoxyflavone)	Flavonoids	Flavones	C17H14O7	1	34334-69-5	188631	186583	165065	33013	33013	33013	1.28098	0.0026158	0.0156626	5.45521	2.44764	up
pmb0863	LysoPC 16:2(2n isomer)*	Lipids	LPC	C24H46NO7P	3	-	45479	29143.8	36183.3	71466.7	96453.8	89743.7	1.2037	0.00838237	0.0333164	0.430041	-1.21745	down
pme2266	Biotin	Others	Vitamin	C10H16N2O3S	2	58-85-5	264105	264105	264105	1.76252e+06	1.32052e+06	1.45867e+06	1.27646	0.0107357	0.0383867	0.174453	-2.51909	down
Lhnp110107	Cycloolivil	Lignans and Coumarins	Lignans	C20H24O7	3	3064-05-9	265140	271182	233864	57663	68681.6	70489.8	1.27429	0.0015568	0.0114382	3.91287	1.96823	up
Zbhp004510	Hesperetin-3'-O-glucoside	Flavonoids	Flavanones	C22H24O11	2	-	6768.78	6768.78	6768.78	100211	33843.9	800540	1.09288	0.339931	0.44783	0.0217274	-5.52434	down
MWSmce016	Nicotinic Acid Methyl Ester(Methyl Nicotinate)	Alkaloids	Pyridine alkaloids	C7H7NO2	3	93-60-7	61070.4	61070.4	61070.4	371564	437347	305352	1.27416	0.0147416	0.0465054	0.164424	-2.60451	down
Wadp008128	3-Oxo-9beta-pimara-8,15-dien-19,6beta-olide	Terpenoids	Ditepenoids	C20H26O3	3	-	107190	104307	70321	8214.12	8214.12	8214.12	1.27461	0.0185424	0.0534067	11.4363	3.51555	up
pme0109	Methyldopa anhydrous	Amino acids and derivatives	Amino acids and derivatives	C10H13NO4	3	555-30-6	7.55198e+06	8.54629e+06	7.84129e+06	3.16549e+06	3.29676e+06	3.54739e+06	1.27444	0.00152019	0.0112278	2.39165	1.25801	up
Walbp07873	12-Oxo phytodienoic acid	Lipids	Free fatty acids	C18H28O3	1	67204-66-4	424538	453916	353700	1.22877e+06	1.37134e+06	1.49697e+06	1.26713	0.00276867	0.0161976	0.300739	-1.73342	down
Xmgp006913	2,4,2',4'-tetrahydroxy-3'-prenylchalcone	Flavonoids	Chalcones	C20H20O5	3	-	1.07008e+06	1.0172e+06	1.07331e+06	2.56221e+06	3.49151e+06	2.90638e+06	1.26312	0.0187527	0.0538422	0.35274	-1.50332	down
Wacyp04942	2,7-Dimethyl-2,4-Octadiene-1,8-Diol 8-O-B-D-Glucopyranoside	Terpenoids	Monoterpenoids	C16H28O7	1	-	5107.78	5107.78	5107.78	76543.1	36677.8	25538.9	1.22564	0.117214	0.199661	0.110431	-3.17879	down
MWSmce064	Haematoxylin	Phenolic acids	Phenolic acids	C16H14O6	3	517-28-2	290702	496819	405858	1.90073e+06	2.04215e+06	1.97483e+06	1.25904	6.74702e-05	0.0020249	0.201662	-2.30999	down
Zbsp004183	Tricin-5-O-(3'-malonyl)glucoside-7-O-glucoside	Flavonoids	Flavones	C32H36O20	3	-	2052.49	2052.49	2052.49	18136.1	19938.9	32371.8	1.26846	0.0409493	0.0929522	0.0874061	-3.51612	down
Wacyp07258	Kaempferol 3-(3,6-Di-P-Coumaroylglucoside)	Flavonoids	Flavonols	C39H32O15	1	-	8571.7	5207.06	13436.5	1041.41	1041.41	1041.41	1.24052	0.0782418	0.148264	8.711	3.12284	up
Qmyp122112	5α,11-Dihydroxy-3-ene-eudesman-2-one	Terpenoids	Sesquiterpenoids	C15H24O3	3	-	960131	1.13575e+06	1.17209e+06	49651.9	49651.9	49651.9	1.28153	0.00393865	0.0204114	21.9392	4.45544	up
Zbkp007535	Artemisin	Terpenoids	Ditepenoids	C15H18O4	3	481-05-0	157056	112066	145067	22413.2	22413.2	22413.2	1.27442	0.0132601	0.0439504	6.15991	2.62291	up
Wagp008739	7,8-Dihydrofurocoumarin	Lignans and Coumarins	Coumarins	C11H8O3	3	51559-40-1	2.1741e+06	2.1661e+06	2.90195e+06	677117	653434	787065	1.26137	0.0175529	0.0519934	3.41995	1.77398	up
Lajp002603	Epigallocatechin-(2β→7,4β→8)-gallocatechin	Flavonoids	Flavanols	C30H24O14	2	-	855892	512134	722531	122285	246061	346726	1.09909	0.0244188	0.0648863	2.92356	1.54773	up
mws2105	Benzyl salicylate	Phenolic acids	Phenolic acids	C14H12O3	3	118-58-1	2.86358e+06	3.05561e+06	2.697e+06	1.08126e+06	915520	1.67104e+06	1.18575	0.00904908	0.0349782	2.34913	1.23213	up
Hmlp005443	6,7-Dihydroxyflavone	Flavonoids	Flavones	C15H10O4	3	38183-04-9	5382.22	5382.22	5382.22	67299.6	76509.6	65158.1	1.28166	0.00292242	0.0167106	0.0772688	-3.69397	down
Wbtp004815	5-hydroxy-6,8-dimethoxy-2,3-dimethylbenzo[g]chromen-4-one	Others	Xanthone	C17H16O5	3	-	1.10626e+07	1.46394e+07	9.08409e+06	4.62888e+06	3.56202e+06	5.91258e+06	1.17216	0.0363358	0.0854211	2.46649	1.30246	up
Wbtp004798	8,11-dimethoxy-2h-[1,3]dioxolo[4,5-b]xanthen-10-one	Flavonoids	Other Flavonoids	C16H12O6	3	-	5.84152e+06	4.55224e+06	6.76646e+06	3.02841e+06	3.19913e+06	2.09673e+06	1.15395	0.0262702	0.0687668	2.06147	1.04367	up
Lmqp002170	Kaempferol 3-sophorotrioside	Flavonoids	Flavonols	C33H40O21	3	80714-53-0	2693.17	2693.17	2693.17	29256.7	13465.9	34653	1.23905	0.068092	0.134842	0.10442	-3.25954	down
Zmlp008132	17-Hydroxy Jolkinolide A (Caudicifolin)	Terpenoids	Ditepenoids	C20H26O4	3	-	2.9008e+06	3.487e+06	2.9163e+06	1.21021e+07	1.30631e+07	1.3467e+07	1.27667	0.000284832	0.00463305	0.240838	-2.05387	down
pme0253	N-Acetyl-L-leucine	Amino acids and derivatives	Amino acids and derivatives	C8H15NO3	3	1188-21-2	59104.3	207621	115526	337444	393243	387666	1.09385	0.0182179	0.0531796	0.341798	-1.54878	down
Lhkp101525	Apiosylskimmin (Adicardin)	Lignans and Coumarins	Coumarins	C20H24O12	3	103529-94-8	23083.8	20524.8	29025.5	3577.3	3577.3	3577.3	1.27519	0.0145653	0.0461563	6.76806	2.75874	up
mws1401	N5-Ethyl-L-glutamine	Amino acids and derivatives	Amino acids and derivatives	C7H14N2O3	3	3081-61-6	3.20817e+06	3.10898e+06	3.2099e+06	1.13328e+06	1.23243e+06	1.33393e+06	1.27596	5.55699e-05	0.0017974	2.57512	1.36464	up
Lcfp061528	Dibutylamine	Alkaloids	Alkaloids	C8H19N	2	111-92-2	19120.5	19120.5	19120.5	264565	100359	98101.6	1.21733	0.133627	0.21913	0.123884	-3.01294	down
pmp000284	Fraxidin (8-Hydroxy-6,7-dimethoxycoumarin)	Lignans and Coumarins	Coumarins	C11H10O5	3	525-21-3	166703	234489	177594	13655.6	13655.6	13655.6	1.2786	0.0134669	0.0442701	14.1282	3.8205	up
Zbkp010423	Zerumbone	Terpenoids	Ditepenoids	C15H22O	3	471-05-6	335700	405033	414946	67140	67140	67140	1.27879	0.00608559	0.0266742	5.73766	2.52046	up
Sasp003574	Grevilloside B	Others	Others	C17H26O8	3	-	310669	114520	180771	22904	22904	22904	1.2364	0.0897664	0.162445	8.81882	3.14059	up
mws1526	Sweroside	Terpenoids	Monoterpenoids	C16H22O9	2	14215-86-2	310669	114520	180771	22904	22904	22904	1.2364	0.0897664	0.162445	8.81882	3.14059	up
Zjmp102029	methyl-iso-ophiopogonanone A	Flavonoids	Other Flavonoids	C19H18O6	3	-	52053.3	28971.7	42051.7	5794.35	5794.35	5794.35	1.26272	0.0341478	0.0815654	7.08028	2.82381	up
Yalp011328	Labda-8(20),12,14-trien-3α-ol	Terpenoids	Ditepenoids	C20H32O	3	-	220285	220285	220285	1.49205e+06	1.10716e+06	1.10143e+06	1.2738	0.0158875	0.0488074	0.178579	-2.48537	down
MWSslk055	Nevadensin*	Flavonoids	Flavones	C18H16O7	2	10176-66-6	1332.33	1332.33	1332.33	15794.3	27808.8	6661.66	1.21077	0.128056	0.212346	0.079519	-3.65256	down
Zmmp003258	Glu-Pro-Leu	Amino acids and derivatives	Amino acids and derivatives	C16H27N3O6	3	-	81939.9	77412.9	65132	23542	29444.7	31279.7	1.25128	0.00435786	0.0217045	2.66399	1.41359	up
Lhcp090202	3-(Acetyloxy)-13,15-dihydroxyoleanan-12-one (Rubiprasin A)	Terpenoids	Triterpene	C32H52O5	3	125263-65-2	150288	135881	134217	8786.74	8786.74	8786.74	1.28214	0.00150573	0.0111798	15.9477	3.99528	up
MWSslk009	Xanthone	Flavonoids	Other Flavonoids	C13H8O2	3	90-47-1	46003.9	46003.9	46003.9	540467	230020	504894	1.24279	0.0608934	0.123543	0.108212	-3.20806	down
Wagp008399	Tambulin	Flavonoids	Flavonols	C18H16O7	1	571-72-2	66546.3	147469	111903	214732	213991	229330	1.08898	0.0369721	0.0859404	0.495276	-1.0137	down
Smmp009329	Isorosmanol	Terpenoids	Ditepenoids	C20H26O5	3	93780-80-4	1.07774e+06	1.17327e+06	1.14205e+06	215548	215548	215548	1.28199	0.000942409	0.0089097	5.24719	2.39154	up
Wcdp007388	10,14,16-Octadecatrien-12-Ynoic Acid	Lipids	Free fatty acids	C18H26O2	2	-	333641	332809	691258	28498.6	28498.6	28498.6	1.26213	0.0708826	0.139243	15.8804	3.98918	up
Zbqp002313	4-amino-5-(butylamino)-5-oxopentanoic acid	Amino acids and derivatives	Amino acids and derivatives	C9H18N2O3	3	-	96129.4	54011.9	84119.2	1.02409e+06	1.09099e+06	1.10885e+06	1.27151	6.95065e-05	0.0020249	0.0726629	-3.78264	down
Lamp005564	Borneol-2-O-β-D-apiofuranosyl(1→6)-β-D-glucopyranoside	Terpenoids	Terpene	C21H36O10	2	-	554270	477750	653725	39180.4	39180.4	39180.4	1.27953	0.00936429	0.0357337	14.3417	3.84215	up
MWStz735	Ganoderal A	Terpenoids	Triterpene	C30H44O2	3	104700-98-3	33084.9	33084.9	33084.9	546856	490962	595066	1.28152	0.0034443	0.0186389	0.0607849	-4.04014	down
Lamp007903	15-Hydroxy-T-muurolol	Terpenoids	Sesquiterpenoids	C15H26O2	3	-	14075	14075	14075	70374.9	112264	123896	1.26266	0.0323847	0.0793821	0.13775	-2.85988	down
Lcyp000676	Isoscopoletin-β-D-glucoside	Lignans and Coumarins	Coumarins	C16H18O9	3	20186-29-2	17248.7	17248.7	17248.7	198154	204030	166089	1.28075	0.00465662	0.0224495	0.0910587	-3.45706	down
Lmjp002764	Umckalin (7-hydroxy-5,6-dimethoxycoumarin)	Lignans and Coumarins	Coumarins	C11H10O5	3	43053-62-9	11719.9	11719.9	11719.9	101093	106343	73629.9	1.27475	0.0149697	0.0470143	0.125094	-2.99892	down
Lcfp121029	4-O-beta-L-Galactopyranosyl-3,6-anhydro-L-galactose	Others	Saccharides	C12H20O10	2	-	99894.3	99894.3	99894.3	1.07131e+06	1.02138e+06	1.13833e+06	1.2821	0.00120012	0.0100212	0.0927521	-3.43048	down
MWSslk200	Scutellarein	Flavonoids	Flavones	C15H10O6	3	529-53-3	866421	1.10073e+06	868960	190445	224353	358255	1.22572	0.00308603	0.0171284	3.66871	1.87527	up
Sayp007892	demethylcaesaldekarin C	Terpenoids	Ditepenoids	C20H28O4	3	-	3.73165e+06	3.13236e+06	4.12173e+06	626472	626472	626472	1.27718	0.00886563	0.0345538	5.84529	2.54727	up
Smgp006499	Buddlenoid A*	Flavonoids	Flavonols	C30H26O13	1	142750-32-1	197327	82905.2	174511	16581	16581	16581	1.24338	0.0610035	0.123588	9.14185	3.19249	up
Lmyp004407	Kaempferol-3-O-(2''-p-Coumaroyl)galactoside*	Flavonoids	Flavonols	C30H26O13	1	-	197327	82905.2	174511	16581	16581	16581	1.24338	0.0610035	0.123588	9.14185	3.19249	up
Lhlp120609	Dehydropicatoside A	Terpenoids	Monoterpenoids	C16H22O7	3	-	515379	547683	695066	1.31971e+06	1.4708e+06	1.39784e+06	1.25271	0.000435336	0.00603466	0.419766	-1.25234	down
Lamp006191	Afrormosin-7-O-(6''-malonyl)glucoside	Flavonoids	Isoflavones	C26H26O13	3	-	4665.52	4665.52	4665.52	41985.9	47556.9	23327.6	1.25403	0.0460325	0.100493	0.124006	-3.01152	down
Sadp003970	2-O-P-Cumaroylglycerol	Phenolic acids	Phenolic acids	C12H14O5	3	-	7670.57	7670.57	7670.57	178335	327691	166281	1.27206	0.0529961	0.111876	0.0342279	-4.86868	down
Wacyp03558	2,7-Dimethyl-2,6-Octadiene-1,4,8-Triol 8-O-B-D-Glucopyranoside	Terpenoids	Monoterpenoids	C16H28O8	2	-	11348.7	11348.7	11348.7	83212.7	56743.3	76016.5	1.2724	0.0165577	0.0500466	0.15764	-2.66529	down
Hmcp000405	Dihydroisopelletierine	Alkaloids	Piperidine alkaloids	C8H17NO	3	-	9.56608e+06	9.71215e+06	9.84585e+06	2.45581e+07	1.80512e+07	1.77901e+07	1.23048	0.0420899	0.0949807	0.482191	-1.05232	down
pmp000170	Andrographidine C	Flavonoids	Flavones	C23H24O10	2	113963-39-6	12766	12766	12766	153108	149270	144401	1.28245	0.000342134	0.00523243	0.0857203	-3.54422	down
Zjtp092403	3,4'-dihydroxy-4,5-dimethoxybibenzyl	Others	Stilbene	C16H18O4	3	-	1.16875e+06	1.51506e+06	1.61392e+06	107447	107447	107447	1.27882	0.010215	0.0373311	13.3329	3.73692	up
WaYp002866	3-(4-hydroxyphenyl)-3-oxopropyl beta-D-glucopyranoside	Phenolic acids	Phenolic acids	C15H20O8	1	53170-92-6	10412.8	10412.8	10412.8	100647	88140.6	110028	1.28043	0.0050144	0.0234784	0.10454	-3.25787	down
Zbsp004894	3'-O-Methyltricetin-7-O-(6''-malonyl)glucoside*	Flavonoids	Flavones	C25H24O15	3	-	3166.33	3166.33	3166.33	36226.5	24930.4	44920.9	1.2693	0.0308274	0.0768365	0.0895474	-3.4812	down
Zbpp002027	Isorhamnetin-3-O-(6''-malonyl)glucoside*	Flavonoids	Flavonols	C25H24O15	3	-	3166.33	3166.33	3166.33	36226.5	24930.4	44920.9	1.2693	0.0308274	0.0768365	0.0895474	-3.4812	down
MWS201384	Arg-Gly	Amino acids and derivatives	Amino acids and derivatives	C8H17N5O3	3	108347-93-9	26478.2	57400.5	35383.6	3261.95	3261.95	3261.95	1.26143	0.0579628	0.11897	12.1872	3.60729	up
HX1282	Sarisan	Others	Others	C11H12O3	3	18607-93-7	498485	305413	434050	50015.3	50015.3	50015.3	1.27017	0.0236283	0.0634446	8.25046	3.04448	up
Smgp006258	6,7,3',4'-Tetrahydroxyaurone-6-O-(6''-O-p-Coumaroyl)glucoside*	Flavonoids	Aurones	C30H26O13	1	-	116127	132966	87027.8	17405.6	17405.6	17405.6	1.27111	0.0195164	0.0554738	6.43705	2.6864	up
Lmyp004318	Kaempferol-3-O-(6''-p-Coumaroyl)galactoside*	Flavonoids	Flavonols	C30H26O13	1	-	116127	132966	87027.8	17405.6	17405.6	17405.6	1.27111	0.0195164	0.0554738	6.43705	2.6864	up
Zmbp008419	6-prenylnaringenin	Flavonoids	Flavanones	C20H20O5	3	68236-13-5	4352.65	4352.65	4352.65	109759	61815	21763.3	1.19922	0.141981	0.229571	0.0675396	-3.88812	down
WaTKp04564	p-Coumaroyl-arabinofuranose	Phenolic acids	Phenolic acids	C14H16O7	3	-	127537	127537	127537	1.28936e+06	1.11262e+06	809887	1.27188	0.0213332	0.0589159	0.119124	-3.06946	down
Zbqp000676	3-(triazan-2-yl)propyl L-prolinate	Amino acids and derivatives	Amino acids and derivatives	C8H18N4O2	1	-	6.31043e+06	5.25614e+06	5.43174e+06	52757.4	52757.4	52757.4	1.2822	0.00335847	0.0182447	107.399	6.74684	up
MWSmce463	Mesitaldehyde	Others	Aldehyde compounds	C10H12O	3	487-68-3	46598	46598	46598	387220	375644	419243	1.28195	0.00140547	0.0109545	0.118258	-3.07999	down
Jmcp010061	costic acid	Terpenoids	Sesquiterpenoids	C15H22O2	3	3650-43-9	691353	694894	690379	66610.1	66610.1	66610.1	1.28257	4.80719e-06	0.000676372	10.392	3.37739	up
mws4168	Praeruptorin A	Lignans and Coumarins	Coumarins	C21H22O7	3	73069-25-7	88436.6	163796	171305	2368.24	2368.24	2368.24	1.27549	0.0344685	0.0821291	59.6136	5.89757	up
Wbsp000161	Lannotinidine C	Alkaloids	Alkaloids	C26H35NO5	3	-	188374	188374	188374	2.3548e+06	4.58065e+06	1.9849e+06	1.26029	0.0752814	0.14446	0.0633521	-3.98046	down
Lmmp003487	Luteolin-7-O-glucuronide-(2→1)-glucuronide	Flavonoids	Flavones	C27H26O18	3	-	878.18	878.18	878.18	18797.3	4390.9	25207.9	1.18895	0.131475	0.216356	0.054437	-4.19927	down
Zmsp000758	1-(Hydroxymethyl)hexahydro-1h-pyrrolizin-2-ol	Alkaloids	Pyrrole alkaloids	C8H15NO2	2	-	6.25202e+07	6.07251e+07	6.13898e+07	1.4813e+07	1.33201e+07	1.34403e+07	1.28118	3.2508e-07	0.000323323	4.44118	2.15094	up
MWS00216g	L-Phenylalaninol	Amino acids and derivatives	Amino acids and derivatives	C9H13NO	3	3182-95-4	11406.5	337609	293855	2281.3	2281.3	2281.3	1.10984	0.173803	0.26595	93.9334	6.55357	up
Zmzp005934	Octadecanamide	Alkaloids	Alkaloids	C18H37NO	3	124-26-5	417.314	417.314	417.314	5327.68	5706.44	3458.36	1.27206	0.0239041	0.0639411	0.0863856	-3.53307	down
Lmhp010908	LysoPC 19:1	Lipids	LPC	C27H54NO7P	3	-	4328.08	4328.08	4328.08	98648.6	92525.8	21640.4	1.19864	0.114482	0.196434	0.0610119	-4.03476	down
mws2218	Caffeine	Alkaloids	Alkaloids	C8H10N4O2	3	58-08-2	187500	68939.7	345218	3727.43	3727.43	3727.43	1.24466	0.13308	0.218742	53.8046	5.74966	up
Zmjp003597	Ampelopsisionoside	Terpenoids	Sesquiterpenoids	C19H32O8	1	138665-44-8	6839.9	6839.9	6839.9	74499.9	34199.5	78431.7	1.24397	0.0590893	0.120485	0.109654	-3.18897	down
MW0156492	S-Adenosylhomocysteine-d4	Nucleotides and derivatives	Nucleotides and derivatives	C14H16D4N6O5S	3	-	6839.9	6839.9	6839.9	74499.9	34199.5	78431.7	1.24397	0.0590893	0.120485	0.109654	-3.18897	down
Zbkp008898	Palustradienol	Terpenoids	Ditepenoids	C20H32O	3	-	113060	113060	113060	762116	710264	565299	1.2761	0.0106494	0.0382724	0.166454	-2.58681	down
Yshj000012	Isotachioside*	Phenolic acids	Phenolic acids	C13H18O8	2	31427-08-4	24686.3	24686.3	24686.3	123431	197025	181650	1.26804	0.0237969	0.0637151	0.147496	-2.76125	down
Lsmp121705	Tachioside*	Phenolic acids	Phenolic acids	C13H18O8	2	109194-60-7	24686.3	24686.3	24686.3	123431	197025	181650	1.26804	0.0237969	0.0637151	0.147496	-2.76125	down
Lahp003733	Clausenaglycoside A	Phenolic acids	Phenolic acids	C17H26O8	3	-	47347.7	47347.7	47347.7	236738	270286	241403	1.28103	0.00268356	0.0159315	0.189789	-2.39753	down
pmp000593	Luteolin-7-O-rutinoside*	Flavonoids	Flavones	C27H30O15	3	3563-98-2	114594	223878	94581.2	1658.16	1658.16	1658.16	1.27371	0.0709573	0.139243	87.0547	6.44385	up
mws1509	Phenyl salicylate	Phenolic acids	Phenolic acids	C13H10O3	3	118-55-8	332750	186241	105348	21069.7	21069.7	21069.7	1.22718	0.106711	0.186511	9.87739	3.30413	up
pmd0136	LysoPC 18:0(2n isomer)	Lipids	LPC	C26H54NO7P	1	-	310004	337827	503588	10097.6	10097.6	10097.6	1.27815	0.0251626	0.0664917	38.0097	5.2483	up
Qmyp101331	3β-Acetoxyspirillanone	Terpenoids	Sesquiterpenoids	C17H26O3	1	-	766898	816839	507880	163970	152500	224240	1.2345	0.0274704	0.0713775	3.86828	1.95169	up
Lmbn000198	3-Dehydro-L-threonate	Others	Saccharides	C4H6O5	1	-	1.99949e+06	1.88294e+06	1.9751e+06	989121	965723	907277	1.27756	5.37716e-05	0.00175946	2.04657	1.03321	up
mws0275	Malate	Organic acids	Organic acids	C4H6O5	1	636-61-3	2.40403e+06	2.26242e+06	2.17423e+06	1.06286e+06	1.16269e+06	1.13282e+06	1.27469	0.000869626	0.00870864	2.0369	1.02638	up
Wayn000504	Malic acid-1-O-diglucoside	Organic acids	Organic acids	C16H26O15	3	-	703044	716402	682602	317515	269143	342623	1.26314	0.000717128	0.0078217	2.26202	1.17761	up
mws0213	Ribitol	Others	Saccharides	C5H12O5	3	488-81-3	1.59008e+06	1.58367e+06	1.66952e+06	4.81619e+06	4.44062e+06	4.74041e+06	1.2805	0.00082376	0.00849106	0.346016	-1.53109	down
mws0943	N1-Methyl-4-pyridone-5-carboxamide	Alkaloids	Pyridine alkaloids	C7H8N2O2	3	769-49-3	1.59008e+06	1.58367e+06	1.66952e+06	4.81619e+06	4.44062e+06	4.74041e+06	1.2805	0.00082376	0.00849106	0.346016	-1.53109	down
pme0534	D-Gluconic acid	Others	Saccharides	C6H12O7	1	526-95-4	452581	465470	456624	190063	248247	229255	1.25286	0.00376387	0.0197603	2.05924	1.04211	up
Zbzn008048	Embelin	Quinones	Quinones	C17H26O4	1	550-24-3	291263	310775	244671	702715	695361	449917	1.17954	0.0501299	0.107111	0.458177	-1.12602	down
Zaln004057	4-caffeoylshikimic acid	Phenolic acids	Phenolic acids	C16H16O8	1	-	239496	234162	247014	1.18196e+06	1.3634e+06	1.10891e+06	1.27879	0.00583706	0.0259897	0.197214	-2.34217	down
Zmtn001624	N-Acetylisatin	Alkaloids	Plumerane	C10H7NO3	3	574-17-4	1.25168e+06	1.15509e+06	1.1279e+06	1.39463e+07	1.44631e+07	1.45771e+07	1.28209	0.0001334	0.00286555	0.0822273	-3.60424	down
Zmhn003257	5,7,2'-Trihydroxy-8-methoxyflavone*	Flavonoids	Flavones	C16H12O6	3	80713-32-2	5.47776e+06	5.53953e+06	5.68281e+06	1.09281e+06	1.2204e+06	1.13222e+06	1.28132	3.13317e-06	0.00060147	4.84702	2.2771	up
MWS20022	15S-Hydroxy-8,11,13-eicosatrienoic acid	Lipids	Free fatty acids	C20H34O3	1	92693-02-2	1.43417e+06	1.48795e+06	1.46974e+06	276414	283276	321415	1.28032	7.48366e-07	0.000522892	4.9845	2.31745	up
Zjbn102516	3,3'-Dihydroxy-5-methoxybibenzyl	Others	Stilbene	C15H16O3	1	-	3.63109e+06	3.31063e+06	3.74355e+06	693185	875755	845998	1.27484	0.000515549	0.00665484	4.42465	2.14556	up
Lmbn005454	Naringenin-5-methyl ether	Flavonoids	Flavones	C16H14O5	2	61823-56-1	6.35926e+06	5.73034e+06	6.1015e+06	1.25129e+06	1.33698e+06	1.26282e+06	1.28109	0.00118816	0.00998761	4.72363	2.23989	up
Wahsn07750	Chrysoeriol-7-O-(3''-Z-p-coumaroylglucoside)	Flavonoids	Flavones	C31H28O13	2	-	369754	313864	314643	106238	109257	108131	1.27649	0.00660417	0.0282005	3.08461	1.62509	up
Lmbn005287	(7S,8S)-DiHODE	Lipids	Free fatty acids	C18H32O4	2	143288-65-7	339094	349311	303035	122652	119305	107192	1.27432	0.00199369	0.0133568	2.8396	1.50569	up
Sasn009320	2-decyl-3-hydroxypentanedioic acid	Lipids	Free fatty acids	C15H28O5	1	-	70275.5	57210	78294.2	20836.8	29912.6	25251.7	1.23513	0.0101818	0.0373311	2.70759	1.43701	up
Wahsn11969	1-O-p-Coumaroyl Dodecanediol	Lipids	Free fatty acids	C21H32O4	1	-	3.22897e+06	3.12311e+06	3.14108e+06	8.4745e+06	8.98677e+06	8.23986e+06	1.28066	0.00136041	0.0106635	0.369367	-1.43687	down
Zazn006864	Nor-toralactone	Others	Others	C14H10O5	3	-	5.65007e+06	5.90951e+06	6.15028e+06	1.59402e+06	1.65603e+06	1.7442e+06	1.28051	0.000489273	0.00646392	3.54605	1.82621	up
pmn001694	9,10,13-Trihydroxy-11-Octadecenoic Acid	Lipids	Free fatty acids	C18H34O5	2	29907-57-1	2.84644e+06	2.90268e+06	2.891e+06	815731	706272	753020	1.28008	8.48944e-06	0.000918819	3.79781	1.92517	up
MWSslk133	1,14-Tetradecanedioic Acid	Lipids	Free fatty acids	C14H26O4	2	821-38-5	1.75431e+06	1.63355e+06	1.69237e+06	584616	468230	694419	1.25415	0.000582123	0.00701465	2.90754	1.5398	up
Hmyn009687	Oxyphyllol D	Terpenoids	Sesquiterpenoids	C15H24O3	3	-	65385.8	62378.1	72767.6	28724.7	21108.4	34248	1.21624	0.00163756	0.0117854	2.38498	1.25398	up
MWSslk092	(-)-Usnic acid	Others	Ketone compounds	C18H16O7	1	125-46-2	25301.2	27413.5	28169.7	139777	53464.3	175698	1.13667	0.117894	0.200334	0.219235	-2.18945	down
Wahsn09317	Kaempferol-3-O-(3'-O-p-coumaroyl,6'-O-cinnamoyl)-glucoside*	Flavonoids	Flavonols	C39H32O14	2	-	145559	144581	138532	580403	648618	495241	1.27422	0.0102489	0.0373967	0.248612	-2.00803	down
Rfmb091	9S-Hydroxy-10E,12Z-octadecadienoic acid*	Lipids	Free fatty acids	C18H32O3	2	15514-85-9	2.24734e+06	2.25202e+06	2.26355e+06	955429	929039	979507	1.28177	2.79855e-05	0.0013816	2.36137	1.23963	up
Wmjn000304	1-HydroxyialibinoA	Quinones	PhenAnthraquinones	C21H30O5	3	-	17944.2	31657.2	24512.8	60357.7	48423.6	46748	1.15616	0.00979386	0.0366714	0.476528	-1.06937	down
mws0918	Prunetin (5,4'-Dihydroxy-7-methoxyisoflavone)	Flavonoids	Isoflavones	C16H12O5	3	552-59-0	7.55559e+06	7.58799e+06	8.05044e+06	1.58508e+06	1.70217e+06	2.04124e+06	1.27546	1.14489e-05	0.000949517	4.35283	2.12195	up
MWS80006	9-Hydroperoxy-9Z,11E-Octadecadienoic Acid	Lipids	Free fatty acids	C18H32O4	2	-	222651	185828	160563	63657.4	63412.4	58905	1.26314	0.018746	0.0538422	3.05978	1.61343	up
Lmhn005110	Aracarpene 1	Flavonoids	Isoflavones	C16H12O6	3	1261245-78-6	2.57268e+06	2.70908e+06	2.88719e+06	526603	533925	564749	1.28101	0.00149775	0.0111499	5.02619	2.32947	up
MWSmce371	Atractylenolide III*	Terpenoids	Sesquiterpenoids	C15H20O3	3	73030-71-4	280219	269743	258413	112344	126576	109846	1.27362	6.13895e-05	0.00191945	2.31781	1.21276	up
Lmjn008534	Shizukolidol*	Terpenoids	Sesquiterpenoids	C15H20O3	3	90332-92-6	280219	269743	258413	112344	126576	109846	1.27362	6.13895e-05	0.00191945	2.31781	1.21276	up
Zmdn007287	Rhein-9-Anthrone	Quinones	Anthraquinone	C15H10O5	3	480-09-1	819153	801367	825563	173462	167678	150274	1.28061	3.44694e-07	0.000323323	4.97764	2.31546	up
mws1659	Emodin	Quinones	Anthraquinone	C15H10O5	3	518-82-1	57535.3	52586.4	48155.9	15490.7	17261.1	14167.2	1.27243	0.00262156	0.0156626	3.37342	1.75421	up
Zbn010259	1,5,7-trihydroxy-6-methoxy-2-methoxymethylanthraquinone	Quinones	Anthraquinone	C17H14O7	3	-	2.16941e+06	2.11254e+06	2.13814e+06	743820	808660	716143	1.27933	1.24848e-05	0.000949517	2.82995	1.50078	up
Wbwn009556	4-[4-(4-hydroxy-3-methoxyphenyl)-2,3-dimethylbutyl]-2-methoxyphenol	Lignans and Coumarins	Lignans	C20H26O4	2	36469-60-0	2.16941e+06	2.11254e+06	2.13814e+06	743820	808660	716143	1.27933	1.24848e-05	0.000949517	2.82995	1.50078	up
Lmnn004130	Lappaol C	Lignans and Coumarins	Lignans	C30H34O10	3	64855-00-1	6.1542e+06	4.87843e+06	5.60303e+06	1.27601e+06	1.24047e+06	1.2863e+06	1.27703	0.00731095	0.0301627	4.37461	2.12915	up
Lmyn005812	Gingerglycolipid A	Lipids	Glycerol ester	C33H56O14	2	145937-22-0	464748	1.0678e+06	556540	1.66511e+06	1.78805e+06	1.28296e+06	1.08914	0.0233331	0.0627876	0.441098	-1.18083	down
Wahsn13149	3-O-p-Coumaroyl 2,3-dihydroxypropyl-2-Hydroxyhexadecanoate	Lipids	Free fatty acids	C28H44O7	1	-	578058	605001	628262	150777	148875	167465	1.27985	0.000226497	0.00402462	3.87765	1.95518	up
Zmfn007930	aloifol I	Others	Stilbene	C16H18O4	3	-	645173	673916	712744	271295	288069	313414	1.27338	0.000237504	0.00402462	2.32801	1.2191	up
pme2914	3-Hydroxy-3-methylglutarate	Organic acids	Organic acids	C6H10O5	1	503-49-1	1.84633e+07	1.81163e+07	1.81883e+07	7.95423e+06	8.04811e+06	7.9006e+06	1.28232	1.08438e-05	0.000949517	2.29126	1.19614	up
Zmyn000155	N-Acetylornithine	Amino acids and derivatives	Amino acids and derivatives	C7H14N2O3	3	6205-08-9	6.06994e+07	5.67085e+07	5.48469e+07	1.63634e+07	1.52015e+07	1.6228e+07	1.28039	0.0011545	0.00982744	3.60419	1.84968	up
Zmdn006903	6-Methylaloe emodin	Quinones	Anthraquinone	C16H12O5	3	873431-39-1	97984.8	102392	105150	25599.2	24729.4	34220.7	1.2661	8.86837e-05	0.0023107	3.61359	1.85343	up
Lmfn002465	1,2,4-Trihydroxynaphthalene-1,4-di-glucoside (Lawsoniaside)	Others	Others	C22H28O13	3	116964-02-4	312938	308733	247498	90846.9	99603.5	131727	1.23828	0.00387596	0.0202355	2.6978	1.43178	up
pme2710	Dihydrojasmonic acid	Organic acids	Organic acids	C12H20O3	3	3572-64-3	7.74187e+06	7.93561e+06	7.97455e+06	1.98849e+06	2.54215e+06	2.60049e+06	1.26955	0.000364119	0.00542133	3.31673	1.72976	up
Wasn006585	Geranyl 3-O-xylopyranosyl-glucopyranoside	Terpenoids	Monoterpenoids	C21H36O10	2	-	2.85969e+06	2.72705e+06	2.6738e+06	1.22843e+06	1.01258e+06	1.13898e+06	1.27148	4.59536e-05	0.00164459	2.44396	1.28922	up
Wahsn13323	1-O-Feruloyl 2,3-dihydroxypropyl 16-hydroxyhexadecanoate	Lipids	Free fatty acids	C29H46O8	3	-	85508.9	81930.7	88327.2	21603.2	22905.9	19356.1	1.27864	5.62147e-05	0.00179759	4.00479	2.00173	up
Zbhn006453	Pedalitin	Flavonoids	Flavones	C16H12O7	3	22384-63-0	272019	187175	266014	102679	102123	107952	1.22971	0.0367971	0.0859404	2.31878	1.21336	up
Xmyn008071	Gnetifolin B*	Flavonoids	Flavonols	C16H12O6	3	140671-06-3	5.23223e+06	5.42896e+06	5.65921e+06	1.08424e+06	1.06061e+06	1.13834e+06	1.28163	0.000559091	0.00690036	4.9709	2.31351	up
Wbtn007495	5,8-dihydroxy-10-methoxy-2-propylbenzo[h]chromen-4-one	Others	Ketone compounds	C17H16O5	3	-	5.23223e+06	5.42896e+06	5.65921e+06	1.08424e+06	1.06061e+06	1.13834e+06	1.28163	0.000559091	0.00690036	4.9709	2.31351	up
Lmhn004976	Aracarpene 2*	Flavonoids	Isoflavones	C16H12O6	3	-	5.23223e+06	5.42896e+06	5.65921e+06	1.08424e+06	1.06061e+06	1.13834e+06	1.28163	0.000559091	0.00690036	4.9709	2.31351	up
Walbn06605	2,3-bis(2-carboxyphenyl)succinic acid	Phenolic acids	Phenolic acids	C18H14O8	1	-	7.98649e+06	8.2428e+06	7.99419e+06	1.12072e+06	1.81924e+06	1.26119e+06	1.26535	0.000237907	0.00402462	5.76592	2.52755	up
Wafn002319	4-O-(3'-O-alpha-D-Glucopyranosyl)caffeoylquinic acid	Phenolic acids	Phenolic acids	C22H28O14	2	1401352-63-3	29709	34180.8	27562	59791.6	107985	70088.3	1.18926	0.077065	0.146583	0.38447	-1.37906	down
Cmcn011220	Imbricatolic acid	Terpenoids	Ditepenoids	C20H34O3	3	6832-60-6	165693	169216	165076	40068.6	34939.6	34002.5	1.2797	2.27773e-06	0.00060147	4.58656	2.19741	up
MWStz454	Cannabiscitrin	Flavonoids	Flavonols	C21H20O13	2	520-14-9	1.27153e+06	1.78147e+06	1.48096e+06	6.20283e+06	4.09241e+06	3.84488e+06	1.22186	0.0458358	0.100219	0.320644	-1.64095	down
Cmsn002383	(7S,8S-Threo-3',4,7,9-tetrahydroxy-3-methoxy-8-O-4'-neolignan-9'-O-rhamnoside	Lignans and Coumarins	Lignans	C25H34O11	2	-	56393.8	75386.1	60149.7	89942.2	183983	227215	1.07243	0.123232	0.20672	0.382985	-1.38464	down
mws0262	(R,R)-Tartaric acid	Organic acids	Organic acids	C4H6O6	3	87-69-4	228136	236618	243033	75307.3	149721	114853	1.13726	0.0255789	0.067396	2.08246	1.05829	up
Lcfn143038	10-hydroxydecanoicacid10-O-beta-D-glucopyranoside	Lipids	Free fatty acids	C16H30O8	3	-	915761	921105	962384	443473	419878	436463	1.28036	0.000109192	0.00264886	2.15358	1.10673	up
Zahn004036	2,3-Dihydro-1,4-naphthoquinone	Quinones	Quinones	C10H8O2	3	21545-31-3	239840	208614	290937	132834	60508.3	110686	1.12381	0.0110301	0.0391122	2.43198	1.28213	up
Lmfn006411	Cryptostrobin (8-C-Methyl-5,7-Dihydroxyflavanone)	Flavonoids	Flavanones	C16H14O4	1	-	3.62433e+06	3.63306e+06	3.85426e+06	745661	715901	644426	1.28042	0.000122057	0.00281148	5.27622	2.3995	up
mws0011	Syringin	Others	Alcohol compounds	C17H24O9	2	118-34-3	2.72045e+06	2.59525e+06	2.76958e+06	9.54959e+06	8.6414e+06	8.88682e+06	1.28036	0.00132438	0.0105696	0.298594	-1.74374	down
Wafn011571	alpha-Hydroxylinoleic acid*	Lipids	Free fatty acids	C18H32O3	2	57818-44-7	2.40146e+06	2.34736e+06	2.49151e+06	985793	932675	1.02053e+06	1.27948	4.27596e-05	0.00158323	2.46354	1.30073	up
Lmhn006206	Flavoyadorinin B	Flavonoids	Flavones	C23H24O11	3	-	429538	208156	330108	134966	154643	181227	1.06699	0.116915	0.199514	2.0555	1.03949	up
Zmyn000453	Isocitrate*	Organic acids	Organic acids	C6H8O7	1	320-77-4	6.73714e+06	6.48472e+06	6.73089e+06	3.08123e+06	3.30435e+06	2.98429e+06	1.27774	1.12755e-05	0.000949517	2.12946	1.09049	up
Safn001079	(2S,3R)-2,3-dihydroxy-5-oxohexanedioic acid*	Organic acids	Organic acids	C6H8O7	1	-	6.73714e+06	6.48472e+06	6.73089e+06	3.08123e+06	3.30435e+06	2.98429e+06	1.27774	1.12755e-05	0.000949517	2.12946	1.09049	up
MWS3036	3-Hydroxyglutaric acid	Organic acids	Organic acids	C5H8O5	3	638-18-6	2.50059e+06	2.48102e+06	2.23499e+06	1.11949e+06	966612	1.16576e+06	1.26488	0.000416529	0.00593036	2.21922	1.15005	up
ML10171848	D-Arabinono-1,4-lactone	Others	Saccharides	C5H8O5	3	2782-09-4	2.50059e+06	2.48102e+06	2.23499e+06	1.11949e+06	966612	1.16576e+06	1.26488	0.000416529	0.00593036	2.21922	1.15005	up
Wahsn07697	Kaempferide-3-O-(6''-Z-p-coumaroylarabinoside)*	Flavonoids	Flavonols	C30H26O12	2	-	4.70828e+06	4.51359e+06	4.51265e+06	1.07971e+06	1.29017e+06	1.0808e+06	1.27757	3.7969e-06	0.000628498	3.98024	1.99285	up
pme2563	gamma-L-Glutamyl-L-cysteine	Amino acids and derivatives	Amino acids and derivatives	C8H14N2O5S	3	636-58-8	292328	266362	199964	80480.3	68636.5	72500.3	1.25727	0.0213779	0.0589551	3.42326	1.77537	up
Lcfn121126	4-Methylene-2-octyl-5-oxotetrahydrofuran-3-carboxylicacid(C75)	Others	Lactones	C14H22O4	2	218137-86-1	1.9742e+07	1.95574e+07	2.13374e+07	3.6907e+06	5.04238e+06	4.57951e+06	1.27233	5.15535e-05	0.00172704	4.55485	2.1874	up
HJN074	Procyanidin A6	Tannins	Proanthocyanidins	C31H28O12	3	-	1.80425e+06	1.77853e+06	1.57955e+06	756467	744211	664488	1.27108	0.00179783	0.0126795	2.38427	1.25355	up
Sasn010334	3,3,14,14-tetramethylhexadecanedioic acid	Lipids	Free fatty acids	C20H38O4	1	87272-20-6	347462	357370	350262	143679	106721	141617	1.25916	0.00182826	0.0127979	2.69145	1.42838	up
Lmhn007953	Hexylitaconic acid	Organic acids	Organic acids	C11H18O4	3	-	521526	516213	569055	55490.6	58200.5	66499.9	1.28048	0.00085772	0.00862497	8.91717	3.15659	up
Zasn010461	Methyl 14-methylpentadecanoate	Lipids	Free fatty acids	C17H34O2	3	5129-60-2	4.96284e+06	5.1308e+06	4.05315e+06	1.5264e+06	1.26923e+06	1.40864e+06	1.26851	0.00768733	0.0313509	3.36486	1.75055	up
Zmtn001464	Xanthurenic acid	Alkaloids	Quinoline alkaloids	C10H7NO4	3	59-00-7	7.57796e+06	7.91009e+06	7.60464e+06	1.76753e+06	1.78351e+06	1.87847e+06	1.28192	9.31956e-05	0.00236263	4.25318	2.08854	up
mws1574	Geniposidic acid*	Terpenoids	Monoterpenoids	C16H22O10	3	27741-01-1	213348	194270	183665	450908	390216	406451	1.26549	0.00202111	0.0133945	0.473945	-1.07721	down
Lmxn015337	Methyl palmitate	Lipids	Free fatty acids	C17H34O2	3	112-39-0	62320.8	60620.1	53449.7	19224.6	15442.7	22528.7	1.25542	0.000460226	0.00616703	3.08397	1.62479	up
Cmmn004667	massonianoside A*	Lignans and Coumarins	Lignans	C25H32O10	1	623945-11-9	712060	1.00584e+06	952160	420130	398225	445411	1.22743	0.0327237	0.0800039	2.11278	1.07914	up
Wahsn09170	Kaempferol-3-O-(3'-O-cinnamoyl,6'-O-p-coumaroyl)-glucoside*	Flavonoids	Flavonols	C39H32O14	2	-	261321	222952	252074	1.11055e+06	1.1358e+06	986494	1.27773	0.0018867	0.0130768	0.227771	-2.13435	down
Wahsn09199	Kaempferol-3-O-(2'',4''-di-(E)-p-coumaroylrhamnoside)*	Flavonoids	Flavonols	C39H32O14	2	-	261321	222952	252074	1.11055e+06	1.1358e+06	986494	1.27773	0.0018867	0.0130768	0.227771	-2.13435	down
mws1423	Dihydropinosylvin	Phenolic acids	Phenolic acids	C14H14O2	2	14531-52-3	9.30559e+06	9.15166e+06	9.65105e+06	748965	789927	866546	1.28169	0.000151284	0.00306269	11.6853	3.54662	up
Safn009833	5-[(1S,2R,3R,5S)-3,5-dihydroxy-2-[(E,3S)-3-hydroxyoct-1-enyl]cyclopentyl]pentanoic acid	Lipids	Free fatty acids	C18H32O5	2	-	5.47499e+06	5.57853e+06	5.61245e+06	1.56578e+06	1.41372e+06	1.58674e+06	1.28051	1.12344e-06	0.000526894	3.64982	1.86783	up
Wahsn13426	1-O-p-Coumaroyl Tetradecanediol	Lipids	Free fatty acids	C23H36O4	2	-	15939	14430.9	14264.1	51263.2	46032.4	47960.9	1.27845	0.000764997	0.00809287	0.307278	-1.70239	down
Lmbn005369	13(S)-HODE;13(S)-Hydroxyoctadeca-9Z,11E-dienoic acid*	Lipids	Free fatty acids	C18H32O3	2	10219-69-9	2.38586e+06	2.30091e+06	2.37882e+06	959322	928265	1.01907e+06	1.27974	3.41846e-06	0.00060147	2.43082	1.28145	up
Wahsn09338	Kaempferol-3-O-(2'',3''-di-(E)-p-coumaroylrhamnoside)*	Flavonoids	Flavonols	C39H32O14	2	133740-25-7	151270	114285	131777	603936	624217	499715	1.26944	0.00476075	0.0226679	0.229955	-2.12057	down
Zmyn003693	6-Hydroxy-2'-methoxyflavone	Flavonoids	Flavones	C16H12O4	3	61546-59-6	24131	33574.3	44447.4	107797	83036.7	109006	1.20697	0.00450776	0.0221763	0.34069	-1.55347	down
Wacyn02228	Theasinensin E*	Tannins	Proanthocyanidins	C30H26O14	2	-	4.02399e+06	2.61237e+06	4.18476e+06	1.84206e+06	1.28121e+06	1.19484e+06	1.17332	0.0349092	0.0827586	2.50599	1.32538	up
MWStz400	Nortrachelogenin	Lignans and Coumarins	Lignans	C20H22O7	3	34444-37-6	344693	285700	320039	98759.8	96586.2	85776.2	1.27411	0.00408011	0.0209349	3.38085	1.75739	up
Wahsn07986	Kaempferide-3-O-(2''-Z-p-coumaroylarabinoside)*	Flavonoids	Flavonols	C30H26O12	2	-	4.27763e+06	4.19204e+06	4.10227e+06	1.03711e+06	1.2189e+06	991607	1.27686	8.29643e-06	0.000918819	3.87113	1.95276	up
Lmyn006227	Galangin (3,5,7-Trihydroxyflavone)	Flavonoids	Flavonols	C15H10O5	2	548-83-4	2.19592e+06	2.10864e+06	2.23657e+06	266475	353793	312295	1.27779	8.15344e-06	0.000918819	7.01415	2.81027	up
pme3096	Aminomalonate	Amino acids and derivatives	Amino acids and derivatives	C3H5NO4	3	1068-84-4	1.24113e+06	1.2774e+06	1.20361e+06	443777	434444	482890	1.27927	1.94568e-05	0.00118162	2.73464	1.45135	up
Lmmn006896	3-Hydroxy-4-methyl-2-tridecanoyloxypentanoic acid methyl ester	Lipids	Free fatty acids	C20H38O5	3	-	583490	554943	549997	231475	193747	229935	1.27221	3.53184e-05	0.00144102	2.57714	1.36577	up
Lmqn000432	1-(sn-Glycero-3-phospho)-1D-myo-inositol	Others	Saccharides	C9H19O11P	2	129830-95-1	1.73425e+07	1.71254e+07	1.65079e+07	1.28135e+08	1.27068e+08	1.30102e+08	1.28239	1.89329e-05	0.00118162	0.1323	-2.91811	down
MWStz427	Trachelogenin	Lignans and Coumarins	Lignans	C21H24O7	2	34209-69-3	397003	416479	375503	201665	180851	203551	1.27096	0.000408014	0.0059183	2.02875	1.02059	up
mws2118	Phlorizin	Flavonoids	Chalcones	C21H24O10	1	60-81-1	2.77793e+06	3.30663e+06	3.4317e+06	9.17935e+06	6.50049e+06	7.93443e+06	1.23982	0.0205465	0.0573021	0.402988	-1.31119	down
Lmgn007652	Tianshic acid	Lipids	Free fatty acids	C18H34O5	1	-	4.25391e+06	4.09103e+06	4.38991e+06	1.21083e+06	1.05777e+06	1.12145e+06	1.27975	6.88361e-05	0.0020249	3.75654	1.9094	up
Lmbn003970	9,12,13-TriHOME; 9(S),12(S),13(S)-Trihydroxy-10(E)-octadecenoic acid	Lipids	Free fatty acids	C18H34O5	2	97134-11-7	4.09153e+06	4.2719e+06	4.45162e+06	1.18275e+06	952485	1.06693e+06	1.27669	4.95039e-05	0.00167836	4.002	2.00072	up
MEDN1163	3-Hydroxyhexadecanoic acid	Lipids	Free fatty acids	C16H32O3	3	2398-34-7	1.18276e+06	1.19643e+06	1.2278e+06	3.53194e+06	3.81601e+06	3.6135e+06	1.28128	0.00092868	0.0089097	0.329061	-1.60357	down
Lmhn011365	Morolic acid*	Terpenoids	Triterpene	C30H48O3	3	559-68-2	637612	674721	667660	245191	345621	336159	1.23188	0.0041191	0.0209605	2.13598	1.0949	up
Lmbn000216	3-Methylmalic acid	Organic acids	Organic acids	C5H8O5	3	152204-30-3	2.20616e+06	2.06449e+06	2.17555e+06	947876	931844	885895	1.2796	0.000238845	0.00402462	2.33084	1.22085	up
Cmsn002813	Methyl 2-O-(4-hydroxybenzoyl)-2,4,6-trihydroxyphenylacetate	Phenolic acids	Phenolic acids	C16H14O7	3	-	180702	142869	158890	62206.6	61722.3	63741.5	1.26906	0.0120262	0.0413713	2.57079	1.36221	up
mws0038	5,4'-Dihydroxy-3,7-dimethoxyflavone(Kumatakenin)*	Flavonoids	Flavonols	C17H14O6	3	3301-49-3	346466	358070	363028	127309	132468	125696	1.28145	7.22919e-05	0.00205306	2.7695	1.46962	up
Zbsn009679	Velutin (5,4'-dihydroxy-7,3'-dimethoxyflavone)*	Flavonoids	Flavones	C17H14O6	3	25739-41-7	346466	358070	363028	127309	132468	125696	1.28145	7.22919e-05	0.00205306	2.7695	1.46962	up
MWStz537	3-O-Feruloylquinic acid	Phenolic acids	Phenolic acids	C17H20O9	1	40242-06-6	260828	252903	243140	745749	566788	542624	1.25008	0.0286231	0.0733565	0.407981	-1.29342	down
Lmmn003041	Isolariciresinol-9'-O-xyloside*	Lignans and Coumarins	Lignans	C25H32O10	1	97055-97-5	757021	929440	835144	427836	381817	429577	1.25792	0.00841046	0.0333339	2.03482	1.0249	up
Wahsn10880	1-O-Feruloyl 9,10-Dihydroxypalmitic acid	Lipids	Free fatty acids	C26H40O7	3	-	56305.4	55558.8	55477.7	19901.4	22974.3	20698.7	1.27745	0.000299479	0.00474467	2.63222	1.39628	up
Zapn006835	Pinosylvin	Others	Stilbene	C14H12O2	1	22139-77-1	1.89015e+07	1.86904e+07	1.93945e+07	4.70805e+06	5.9607e+06	6.18598e+06	1.26999	0.000194798	0.00367893	3.38103	1.75746	up
Zbnn006442	Eriodictyol	Flavonoids	Flavanones	C15H12O6	3	552-58-9	231260	225642	229717	74579.7	63961.2	94768.6	1.25538	0.00274439	0.0161512	2.94295	1.55726	up
Wbtn006810	6,7-dihydroxy-1,3-dimethoxyxanthen-9-one	Flavonoids	Other Flavonoids	C15H12O6	3	-	774460	664144	700557	241014	198299	269565	1.26222	0.000604238	0.00717436	3.01767	1.59344	up
Zbqn006065	Datiscetin	Flavonoids	Flavonols	C15H10O6	3	480-15-9	178476	164097	174537	36257.5	45443.6	38581.8	1.27631	4.85446e-05	0.00167836	4.29912	2.10404	up
Lmdn003699	6-O-Trans-Caffeoyl Ajugol	Terpenoids	Monoterpenoids	C24H30O12	3	-	5.56411e+06	6.76154e+06	4.99612e+06	2.28146e+07	3.3664e+07	2.22343e+07	1.25425	0.0294236	0.074678	0.220063	-2.18401	down
Safn000636	6-O-D-glycero-α-D-manno-heptopyranosyl-β-D-glucopyranose	Others	Saccharides	C13H24O12	1	-	1.77583e+06	2.05932e+06	2.37907e+06	993828	919038	1.0557e+06	1.2428	0.0206534	0.0575431	2.09334	1.0658	up
Hmln002100	Nortrachelogenin-4-O-glucoside	Lignans and Coumarins	Lignans	C26H32O12	2	33464-78-7	1.11741e+07	8.78837e+06	9.2324e+06	4.13349e+06	4.23182e+06	4.20629e+06	1.26316	0.0169059	0.0507176	2.32229	1.21555	up
Zmdn005358	Vladinol D	Lignans and Coumarins	Lignans	C20H22O7	3	-	3.39155e+06	3.07133e+06	3.32053e+06	456701	613658	456813	1.27472	0.000119918	0.00278884	6.40622	2.67947	up
Lmbn000193	2-Hydroxy-3-oxopropanoate	Organic acids	Organic acids	C3H4O4	3	2480-77-5	183906	129047	114723	41256.4	66570	81630.1	1.1029	0.0432405	0.0963411	2.25738	1.17465	up
pme0075	N-Acetyl-L-glutamate	Amino acids and derivatives	Amino acids and derivatives	C7H11NO5	3	1188-37-0	4.28718e+06	4.32673e+06	4.13321e+06	1.55574e+06	1.50652e+06	1.48725e+06	1.2817	0.000123889	0.00281148	2.80187	1.48639	up
Zmyn004676	17-Hydroxylinolenic acid	Lipids	Free fatty acids	C18H30O3	2	-	373210	393043	388000	118829	107523	133335	1.27503	1.54634e-05	0.00107278	3.20905	1.68215	up
mws0281	Citrate	Organic acids	Organic acids	C6H8O7	1	77-92-9	3.4176e+07	3.50623e+07	3.58227e+07	1.56257e+07	1.56613e+07	1.62716e+07	1.28111	8.72638e-05	0.00230872	2.20909	1.14345	up
mws0179	Chlorogenic acid methyl ester	Phenolic acids	Phenolic acids	C17H20O9	2	29708-87-0	129679	174815	108552	1.84748e+06	1.67151e+06	1.64925e+06	1.27437	0.000660212	0.00764542	0.0799201	-3.6453	down
mws0192	Succinate*	Organic acids	Organic acids	C4H6O4	1	110-15-6	753988	753747	799027	259917	268006	280940	1.28048	0.000188203	0.00362704	2.85186	1.5119	up
mws0470	Methylmalonic acid*	Organic acids	Organic acids	C4H6O4	1	516-05-2	753988	753747	799027	259917	268006	280940	1.28048	0.000188203	0.00362704	2.85186	1.5119	up
MWSmce248	3-Hydroxycinnamic Acid*	Phenolic acids	Phenolic acids	C9H8O3	3	14755-02-3	1.15426e+06	1.20755e+06	1.15055e+06	711163	387619	423283	1.17639	0.0202756	0.0570313	2.30763	1.20641	up
Xmmn006031	Borneol 7-O-[β-D-apiofuranosyl-(1→6)]-β-D-glucopyranoside*	Terpenoids	Monoterpenoids	C21H36O10	1	88700-35-0	3.04508e+06	2.5851e+06	2.91856e+06	1.19268e+06	1.23239e+06	1.59642e+06	1.23676	0.00132965	0.0105696	2.12576	1.08798	up
Xmcn005741	patrinioside*	Terpenoids	Sesquiterpenoids	C21H36O10	1	-	3.04508e+06	2.5851e+06	2.91856e+06	1.19268e+06	1.23239e+06	1.59642e+06	1.23676	0.00132965	0.0105696	2.12576	1.08798	up
Lmtn004049	Abscisate	Terpenoids	Sesquiterpenoids	C15H20O4	2	21293-29-8	500168	540911	472128	227227	204282	158141	1.24701	0.000416468	0.00593036	2.56628	1.35968	up
Wbwn005757	(2r,3r,4s)-6-hydroxy-4-(4-hydroxy-3-methoxyphenyl)-7-methoxy-2,3-dimethyl-3,4-dihydro-2h-naphthalen-1-one	Lignans and Coumarins	Lignans	C20H22O5	3	-	1.25829e+06	1.19028e+06	1.48818e+06	3.74741e+06	3.70053e+06	3.33241e+06	1.26817	0.000290058	0.00467749	0.365179	-1.45333	down
Wafn002874	4-O-(4'-O-alpha-D-Glucopyranosyl)caffeoylquinic acid	Phenolic acids	Phenolic acids	C22H28O14	3	1401352-62-2	37642.9	36006.9	24683.8	81311.5	88906.5	78117.7	1.22982	0.000838702	0.0085822	0.39597	-1.33654	down
Labn002716	galloyl acetyl glucoside	Phenolic acids	Phenolic acids	C15H18O11	3	-	1.32665e+06	1.40129e+06	1.40106e+06	484552	442412	534212	1.27493	1.71715e-05	0.00112373	2.82581	1.49866	up
Wafn003429	3-Methylbutyl 6-O-(alpha-L-arabinopyranosyl)-beta-D-glucopyranoside	Others	Alcohol compounds	C16H30O10	2	-	308156	530307	464372	1.6224e+06	1.27425e+06	746363	1.11859	0.0837948	0.15517	0.357626	-1.48348	down
Lmln007483	6,9,10-Trihydroxyoctadec-7-enoic acid; Sanleng acid	Lipids	Free fatty acids	C18H34O5	2	-	5.52862e+06	5.36542e+06	5.52478e+06	813730	813456	841640	1.28241	8.73174e-05	0.00230872	6.65045	2.73345	up
Zmyn000230	2-Dehydro-3-deoxy-L-arabinonate	Others	Saccharides	C5H8O5	3	-	2.26051e+06	2.08943e+06	2.15555e+06	1.06431e+06	935588	997123	1.27457	8.25986e-05	0.00225662	2.17065	1.11813	up
pme2380	2-Oxoglutarate	Organic acids	Organic acids	C5H6O5	3	328-50-7	2.83772e+06	2.54412e+06	2.77949e+06	1.0806e+06	1.05032e+06	1.09486e+06	1.27877	0.00249908	0.0153211	2.53004	1.33916	up
Wbmn00859	vitelignin A	Lignans and Coumarins	Lignans	C20H16O8	3	-	2.59025e+06	2.59196e+06	4.56104e+06	1.04038e+06	426953	1.29498e+06	1.10681	0.0561846	0.116392	3.52722	1.81853	up
Zbpn005555	Phloretin-4'-O-glucoside (Trilobatin)*	Flavonoids	Chalcones	C21H24O10	1	4192-90-9	4.2442e+06	3.54238e+06	3.45682e+06	8.25023e+06	1.01821e+07	9.99039e+06	1.25744	0.00523705	0.0241988	0.395579	-1.33796	down
HJN055	Dihydrocharcone-4'-O-glucoside*	Flavonoids	Chalcones	C21H24O10	1	-	3.66165e+06	3.37981e+06	3.0189e+06	6.96757e+06	8.20863e+06	9.44882e+06	1.2487	0.0161575	0.0494024	0.408542	-1.29144	down
mws0044	Taxifolin	Flavonoids	Flavanonols	C15H12O7	2	480-18-2	4.12184e+07	3.96176e+07	3.76107e+07	1.84048e+07	1.31787e+07	1.77349e+07	1.24571	0.000709152	0.00779079	2.40167	1.26404	up
Hahn002084	6'-O-caffeoylcatalpol	Terpenoids	Monoterpenoids	C24H28O13	3	-	372195	405750	243803	674594	657570	724678	1.17217	0.010829	0.0386711	0.496756	-1.00939	down
Wbkn005292	[(1S,2S,3S,7R,9R,13S,14R,15R,17S)-3,15-diacetyloxy-7-hydroxy-2,6,14-trimethyl-4,11,16-trioxo-10-oxatetracyclo[7.7.1.02,7.013,17]heptadec-5-en-17-yl]methylacetate	Terpenoids	Ditepenoids	C26H32O11	3	-	2.23088e+07	1.68095e+07	1.89173e+07	6.87581e+06	6.02745e+06	1.0765e+07	1.18254	0.00628754	0.027312	2.45204	1.29398	up
pme3705	D-Glucuronate*	Others	Saccharides	C6H10O7	1	528-16-5	1.25722e+07	1.22947e+07	1.20708e+07	4.98066e+06	4.97434e+06	4.96522e+06	1.28215	0.000385755	0.00562443	2.47568	1.30783	up
mws1189	D-Galacturonate*	Others	Saccharides	C6H10O7	1	685-73-4	1.25722e+07	1.22947e+07	1.20708e+07	4.98066e+06	4.97434e+06	4.96522e+06	1.28215	0.000385755	0.00562443	2.47568	1.30783	up
pme3083	Formylanthranilate	Phenolic acids	Phenolic acids	C8H7NO3	3	3342-77-6	772104	741405	853472	348129	285790	382562	1.25147	0.000579658	0.00701465	2.3286	1.21947	up
Zbln000478	2-(4-hydroxy-1-((3,4,5-trihydroxy-6-(hydroxymethyl)tetrahydro-2H-pyran-2-yl)oxy)cyclohexyl)acetic acid	Others	Saccharides	C14H24O9	2	-	1.37921e+06	1.50049e+06	1.65226e+06	4.46164e+06	3.86569e+06	4.11472e+06	1.27155	0.0011492	0.00982744	0.364245	-1.45702	down
mws0021	Resveratrol	Others	Stilbene	C14H12O3	3	501-36-0	597914	567761	553970	216565	293674	273095	1.24754	0.00103263	0.00916663	2.19529	1.13441	up
Lmjn102210	Desmethylagrimonolide-6-O-glucoside	Lignans and Coumarins	Coumarins	C23H26O10	1	1257408-55-1	4.04588e+06	3.55949e+06	3.97345e+06	1.73436e+06	1.74388e+06	1.73214e+06	1.27605	0.00503533	0.0234982	2.22226	1.15202	up
Waymn03248	4-O-Feruloylquinic acid	Phenolic acids	Phenolic acids	C17H20O9	2	2613-86-7	275764	303131	301334	686019	606351	567147	1.26429	0.00812282	0.0326481	0.473364	-1.07898	down
Lcsn000191	isatioxyneolignoside A	Lignans and Coumarins	Lignans	C24H30O13	3	-	5.04615e+06	5.50019e+06	5.6965e+06	1.09099e+07	1.12777e+07	1.09532e+07	1.27561	7.29588e-05	0.00205306	0.490116	-1.02881	down
mws1090	D-Glucose-1-phosphate*	Others	Saccharides	C6H13O9P	1	59-56-3	2.71677e+07	2.42829e+07	2.41462e+07	7.83129e+07	7.73771e+07	7.67863e+07	1.27952	3.73826e-05	0.00144102	0.32518	-1.62069	down
MWS2442	D-Fructose 6-Phosphate*	Others	Saccharides	C6H13O9P	1	643-13-0	2.71677e+07	2.42829e+07	2.41462e+07	7.83129e+07	7.73771e+07	7.67863e+07	1.27952	3.73826e-05	0.00144102	0.32518	-1.62069	down
Zbkn000353	myo-Inositol 5-phosphate*	Others	Saccharides	C6H13O9P	1	-	2.71677e+07	2.42829e+07	2.41462e+07	7.83129e+07	7.73771e+07	7.67863e+07	1.27952	3.73826e-05	0.00144102	0.32518	-1.62069	down
mws0866	D-Glucose 6-phosphate*	Others	Saccharides	C6H13O9P	1	56-73-5	2.71677e+07	2.42829e+07	2.41462e+07	7.83129e+07	7.73771e+07	7.67863e+07	1.27952	3.73826e-05	0.00144102	0.32518	-1.62069	down
Wacn002147	2-O-(1'-O-glucosyl-p-Coumaroyl)hydroxycitric Acid	Phenolic acids	Phenolic acids	C21H24O15	2	-	129342	139139	141786	35278	25840.7	38292	1.26416	4.12419e-05	0.0015474	4.12699	2.04509	up
pme0257	Uracil	Nucleotides and derivatives	Nucleotides and derivatives	C4H4N2O2	3	66-22-8	3.96277e+06	3.81645e+06	3.71985e+06	2.09512e+06	1.69376e+06	1.95656e+06	1.26083	0.000495609	0.00648671	2.00143	1.00103	up
mws0805	N-Acetylneuraminate	Amino acids and derivatives	Amino acids and derivatives	C11H19NO9	3	131-48-6	242532	301811	301728	144020	122258	138257	1.2475	0.0112062	0.0393195	2.09147	1.06452	up
Wasn000410	sn-glycero-3-phospho-(1'-sn-glycerol)	Others	Others	C6H15O8P	3	-	2.19709e+07	2.04832e+07	2.29606e+07	8.30074e+07	8.04628e+07	7.26126e+07	1.27839	0.00199334	0.0133568	0.277083	-1.85161	down
Zmgn000217	Itaconate	Organic acids	Organic acids	C5H6O4	3	97-65-4	487077	476117	440609	248988	210539	222294	1.26657	0.000235599	0.00402462	2.0589	1.04187	up
pmb3072	3-O-p-Coumaroylshikimic acid-O-glucoside	Phenolic acids	Phenolic acids	C22H26O12	1	-	660838	541770	613662	300398	246070	267390	1.25671	0.00405436	0.0208606	2.23168	1.15813	up
Wchn003633	4'-Hydroxy-2'-Methoxyphenol 1-O-Beta-D-(6-O-Syringoyl) Glucopyranoside	Phenolic acids	Phenolic acids	C22H26O12	1	-	390185	449723	543639	119299	147646	136534	1.26064	0.015676	0.048422	3.42905	1.77781	up
Wdzn000513	methyl alpha-D-fructofuranoside*	Others	Saccharides	C7H14O6	2	-	4.19092e+07	4.00061e+07	4.0004e+07	7.1249e+06	7.38322e+06	7.2146e+06	1.28226	0.000303497	0.00474467	5.61253	2.48865	up
mws2104	D-Pinitol*	Others	Saccharides	C7H14O6	2	10284-63-6	4.19092e+07	4.00061e+07	4.0004e+07	7.1249e+06	7.38322e+06	7.2146e+06	1.28226	0.000303497	0.00474467	5.61253	2.48865	up
Sasn000615	lactobionic acid	Others	Saccharides	C12H22O12	1	96-82-2	5.7571e+06	4.9224e+06	5.70363e+06	1.77572e+07	1.43466e+07	1.51585e+07	1.26757	0.00679208	0.0288715	0.346643	-1.52848	down
HJN054	Secoisolariciresinol-9'-O-xyloside	Lignans and Coumarins	Lignans	C25H34O10	2	-	3.34784e+07	3.39729e+07	3.52183e+07	1.48522e+07	1.38396e+07	1.45333e+07	1.28033	3.60096e-05	0.00144102	2.37523	1.24807	up
MWS2001	2-Hydroxy-3,5-dinitrobenzoic acid	Phenolic acids	Phenolic acids	C7H4N2O7	3	609-99-4	517648	654785	629195	235170	234886	233910	1.26738	0.012977	0.0432624	2.55926	1.35572	up
mws0277	Quinate	Organic acids	Organic acids	C7H12O6	1	77-95-2	8.91602e+06	8.81909e+06	8.93131e+06	3.25569e+06	3.42196e+06	3.54381e+06	1.28083	2.7341e-05	0.0013816	2.60887	1.38342	up
Zbbn004440	10-O-Caffeoyl-geniposidic acid	Terpenoids	Monoterpenoids	C25H28O13	3	-	2.81162e+07	3.06258e+07	3.04149e+07	1.47821e+07	1.24712e+07	1.37747e+07	1.2694	0.0001303	0.00284237	2.17308	1.11974	up
mws2523	alpha,alpha'-Trehalose 6-phosphate	Others	Saccharides	C12H23O14P	3	4484-88-2	3.28908e+06	3.19028e+06	2.73069e+06	9.21096e+06	9.44729e+06	8.7232e+06	1.27428	3.50447e-05	0.00144102	0.336361	-1.57192	down
pmb2657	N-(L-Arginino)succinate	Amino acids and derivatives	Amino acids and derivatives	C10H18N4O6	3	2387-71-5	213608	211136	175443	76191.7	62643.6	74490.7	1.26426	0.00477595	0.0227019	2.81347	1.49235	up
Wamxn00739	Methyl Alpha-D-Galactopyranoside	Others	Alcohol compounds	C7H14O6	2	-	1.0784e+07	1.16025e+07	1.21789e+07	4.35007e+06	4.12043e+06	5.63968e+06	1.25057	0.000446918	0.00610498	2.44968	1.29259	up
Zbjn003642	1-O-rhamnose-3-O-Caffeoyl Quinic Acid	Phenolic acids	Phenolic acids	C22H28O13	3	-	566124	462672	624076	157209	180301	178734	1.26418	0.0134824	0.0442701	3.20172	1.67885	up
Lmdn003674	6-O-p-HydroxybenzoylAjugol	Terpenoids	Monoterpenoids	C22H28O11	2	-	1.84011e+06	2.02585e+06	2.04142e+06	625769	622777	599151	1.28008	0.00197036	0.0133462	3.19716	1.67679	up
Zmyn000110	alpha-D-Glucosamine 1-phosphate	Others	Saccharides	C6H14NO8P	3	2152-75-2	220668	191362	183028	1.48257e+06	1.39482e+06	1.3915e+06	1.28018	0.000127841	0.00283264	0.139394	-2.84276	down
Wahln04659	5'-Methoxylariciresinol xyloside*	Lignans and Coumarins	Lignans	C26H34O11	3	-	97094.3	85555.9	31991.1	155012	177771	507351	1.01229	0.205635	0.302644	0.255485	-1.96869	down
Lhyp112511	Rumphioside B	Terpenoids	Ditepenoids	C28H38O13	3	-	97094.3	85555.9	31991.1	155012	177771	507351	1.01229	0.205635	0.302644	0.255485	-1.96869	down
Ypgn004474	Resveratroloside*	Others	Stilbene	C20H22O8	3	38963-95-0	3.5059e+06	3.29498e+06	3.61676e+06	1.66041e+06	1.61756e+06	1.49584e+06	1.27525	0.00038332	0.00562443	2.18225	1.12581	up
Zmhn001970	Piceid (3,4',5-Trihydroxystilbene-3-O-glucoside)*	Others	Stilbene	C20H22O8	3	27208-80-6	2.98138e+06	2.98837e+06	3.51966e+06	1.60952e+06	1.74334e+06	1.37149e+06	1.24233	0.00332748	0.0181113	2.00861	1.0062	up
Wcfn003424	Coumaroyl Quinic Acid	Others	Others	C16H18O8	3	-	1.38881e+06	1.26668e+06	1.26215e+06	1.88409e+07	1.80368e+07	1.50348e+07	1.28038	0.00515418	0.023855	0.0754663	-3.72802	down
pmn001421	3-O-p-Coumaroylquinic acid	Phenolic acids	Phenolic acids	C16H18O8	1	87099-71-6	1.38881e+06	1.26668e+06	1.26215e+06	1.88409e+07	1.80368e+07	1.50348e+07	1.28038	0.00515418	0.023855	0.0754663	-3.72802	down
pme2435	L-Fucose	Others	Saccharides	C6H12O5	3	-	434603	408646	311193	200021	188636	187718	1.22682	0.0347244	0.082529	2.00294	1.00212	up
Wafn003485	Dihydroxyoctanoic acid glucoside	Lipids	Free fatty acids	C14H26O9	3	-	167737	199905	173789	870402	822687	863214	1.27914	1.14605e-05	0.000949517	0.211802	-2.23921	down
Smln010875	inumakoic acid	Terpenoids	Ditepenoids	C20H28O3	2	-	4.42083e+06	4.4239e+06	4.37341e+06	1.63838e+07	1.49898e+07	1.66455e+07	1.28086	0.00193909	0.0131802	0.275268	-1.86109	down
MWSHC20125	5-O-Caffeoylshikimic acid	Phenolic acids	Phenolic acids	C16H16O8	1	73263-62-4	1.03444e+07	9.94233e+06	1.05062e+07	5.44844e+07	4.90647e+07	5.07904e+07	1.28136	0.00135653	0.0106628	0.199514	-2.32544	down
Smln008909	Aloebarbendol	Phenolic acids	Phenolic acids	C15H14O4	3	194145-93-2	1.4065e+06	1.52467e+06	1.46502e+06	321392	344088	387485	1.2782	6.34365e-05	0.00196165	4.17506	2.0618	up
Wasn006102	Apiosylrhododendrin	Phenolic acids	Phenolic acids	C21H32O11	3	-	1.67312e+06	1.64358e+06	1.86938e+06	518379	570104	427755	1.26794	0.00043494	0.00603466	3.42036	1.77415	up
mws0467	Phloretate	Phenolic acids	Phenolic acids	C9H10O3	3	501-97-3	195393	236016	182762	104788	107852	62742.3	1.16288	0.00664663	0.0282959	2.23025	1.15721	up
Zmdn007764	isoemodin	Quinones	Anthraquinone	C15H10O5	3	-	355467	351590	376056	84435.4	81531.9	68255.6	1.27736	2.35494e-05	0.00127439	4.62428	2.20923	up
Lakn001671	2-β-D-Glucopyranosyloxy-5-hydroxy-phenylacetic acid	Phenolic acids	Phenolic acids	C14H18O9	1	-	2.25673e+06	5.15397e+06	5.22394e+06	1.51667e+06	1.37791e+06	1.59852e+06	1.10899	0.108336	0.188327	2.81201	1.4916	up
Safn006268	Pterosupin	Flavonoids	Chalcones	C21H24O10	3	-	3.1139e+06	2.76561e+06	2.59682e+06	41620.1	21694.7	46252.6	1.27494	0.00290857	0.0167035	77.3618	6.27355	up
Wahsn07345	Kaempferide-3-O-(3''-Z-p-coumaroylarabinoside)	Flavonoids	Flavonols	C30H26O12	1	-	1.77002e+06	1.77184e+06	1.69948e+06	719108	861909	691542	1.26539	0.00066986	0.00768923	2.30636	1.20562	up
mws1024	4-Hydroxycinnamyl aldehyde	Others	Aldehyde compounds	C9H8O2	3	2538-87-6	75301.2	92465.9	73879.8	31495.7	41840	22971.8	1.19189	0.00401089	0.0207095	2.50912	1.32718	up
mws0159	Phenylpyruvate	Phenolic acids	Phenolic acids	C9H8O3	3	156-06-9	154473	202004	123824	83513.3	65799.4	46815.7	1.15364	0.0360055	0.0848571	2.44891	1.29214	up
mws2108	Cryptochlorogenic acid (4-O-Caffeoylquinic acid)*	Phenolic acids	Phenolic acids	C16H18O9	1	905-99-7	160081	124809	117299	596731	1.00879e+06	619539	1.25022	0.0439693	0.0973482	0.180755	-2.46789	down
pme1975	Malonate	Organic acids	Organic acids	C3H4O4	3	141-82-2	1.22101e+06	1.20265e+06	1.17621e+06	499327	536742	567079	1.27685	3.10656e-05	0.00144102	2.2455	1.16704	up
mws0597	5-Hydroxyindoleacetate	Alkaloids	Plumerane	C10H9NO3	3	54-16-0	21673.9	46516.2	58673.7	289600	306612	298132	1.22985	0.000358903	0.00537209	0.141851	-2.81755	down
pmb2653	DMelezitose O-rhamnoside	Others	Saccharides	C24H42O20	3	-	76472.9	163504	197728	295684	306726	394943	1.05934	0.0181978	0.053176	0.438867	-1.18815	down
Wahsn05900	4-(3-hydroxy-2-(4-(3-hydroxyprop-1-en-1-yl)phenoxy)propyl)-2-methoxyphenol glucoside	Lignans and Coumarins	Lignans	C25H32O10	1	-	96762.4	101807	111019	552720	410446	350513	1.25882	0.0301166	0.0756006	0.235666	-2.08518	down
Zmpn000095	Sorbitol 6-phosphate	Others	Saccharides	C6H15O9P	3	20479-58-7	231999	255712	220725	684919	690235	635433	1.27654	0.000132022	0.00285777	0.352353	-1.50491	down
ZbBn000907	Shikimic Acid-3-Phosphate	Organic acids	Organic acids	C7H11O8P	3	114489-69-9	58229.4	107706	82145.3	335022	280261	265910	1.22982	0.00197358	0.0133462	0.281528	-1.82865	down
Saln004300	methyl (2S,3R,4S)-3-ethenyl-4-[2-[(E)-3-(4-hydroxy-3-methoxyphenyl)prop-2-enoyl]oxyethyl]-2-[(2S,3R,4S,5S,6R)-3,4,5-trihydroxy-6-(hydroxymethyl)oxan-2-yl]oxy-3,4-dihydro-2H-pyran-5-carboxylate	Terpenoids	Monoterpenoids	C27H34O13	3	-	77501.3	89788.3	59190.3	229871	142902	107898	1.04888	0.137627	0.223434	0.471175	-1.08566	down
pmn001643	Isolariciresinol-9'-O-rhamnoside (Aviculin)	Lignans and Coumarins	Lignans	C26H34O10	3	156765-33-2	1.3623e+06	1.50131e+06	1.4001e+06	146818	162133	145038	1.2815	0.000898423	0.00880893	9.39168	3.23138	up
mws0102	Indole-5-carboxylic acid*	Alkaloids	Plumerane	C9H7NO2	3	1670-81-1	48600.4	35978	28874.6	20614.4	11516.5	17033.6	1.12772	0.0477226	0.102996	2.30762	1.20641	up
pmb3081	Glucaric acid-1-Phosphate	Others	Saccharides	C6H11PO11	3	-	1.49463e+06	1.23999e+06	1.50489e+06	5.40256e+06	6.09497e+06	5.22437e+06	1.27435	0.00193405	0.0131778	0.253531	-1.97977	down
pme3163	D-Sedoheptuiose 7-phosphate	Others	Saccharides	C7H15O10P	3	2646-35-7	1.49463e+06	1.23999e+06	1.50489e+06	5.40256e+06	6.09497e+06	5.22437e+06	1.27435	0.00193405	0.0131778	0.253531	-1.97977	down
Safn000900	2,3,5-trihydroxy-4-(phosphonooxy)hexanedioic acid	Others	Others	C6H11O11P	2	-	1.49463e+06	1.23999e+06	1.50489e+06	5.40256e+06	6.09497e+06	5.22437e+06	1.27435	0.00193405	0.0131778	0.253531	-1.97977	down
Zbfn003303	3-(Hydroxycinnamoyl)-quinic acid*	Phenolic acids	Phenolic acids	C16H18O8	1	-	199617	207027	187674	583779	447222	437118	1.25329	0.0240296	0.0641485	0.404816	-1.30466	down
pmf0512	Oxamate	Amino acids and derivatives	Amino acids and derivatives	C2H3NO3	3	471-47-6	57730.9	40243.7	60375.9	15048.1	23581.8	31006	1.10837	0.0227961	0.0617403	2.27398	1.18522	up
HJN104	Dihydromyricetin-3-O-glucoside	Flavonoids	Flavanonols	C21H22O13	3	-	646951	513825	729688	280218	245786	201177	1.22979	0.0162491	0.0494859	2.59972	1.37836	up
Zaxn006117	torreyagrandate	Terpenoids	Ditepenoids	C21H30O3	3	-	1.83549e+06	1.62376e+06	1.63803e+06	324752	324752	324752	1.28111	0.00246229	0.0151617	5.23197	2.38735	up
Zbjn008081	Kaempferide*	Flavonoids	Flavonols	C16H12O6	3	491-54-3	164560	185473	192980	36870.9	26981.8	37711.1	1.27025	0.00105111	0.00924319	5.34653	2.4186	up
Zbrn008158	Chrysoeriol*	Flavonoids	Flavones	C16H12O6	3	491-71-4	164560	185473	192980	36870.9	26981.8	37711.1	1.27025	0.00105111	0.00924319	5.34653	2.4186	up
Hmqn003268	Dihydrotricetin	Flavonoids	Flavanones	C15H12O7	3	-	1.01404e+06	988312	1.05084e+06	150095	84792.4	113981	1.26829	4.319e-06	0.00065605	8.75171	3.12957	up
mws1454	Persicoside*	Flavonoids	Flavanones	C23H26O11	3	28978-03-2	1.18883e+06	1.31259e+06	1.32637e+06	4.36824e+06	2.73158e+06	3.19442e+06	1.23058	0.0464436	0.101084	0.371838	-1.42725	down
Hmqn003054	9,10,11-Trihydroxy-12-octadecenoic acid	Lipids	Free fatty acids	C18H34O5	3	61911-67-9	294033	251513	310571	56291.1	66811.4	91936.6	1.25137	0.0012693	0.0103232	3.98121	1.99321	up
pme2601	3-Hydroxypropanoate	Organic acids	Organic acids	C3H6O3	3	503-66-2	145125	143969	91742.5	59829.6	71407.7	43671	1.12949	0.0426117	0.0954991	2.17735	1.12257	up
Wasn002690	Villosolside	Terpenoids	Monoterpenoids	C16H26O9	1	-	444191	473513	344201	106562	129764	109391	1.26257	0.0136612	0.0444422	3.65012	1.86794	up
Wbsn001677	Rhamnosylfucose	Terpenoids	Terpene	C12H22O9	3	-	5.27757e+06	5.61197e+06	5.61896e+06	2.7873e+06	2.58389e+06	2.59278e+06	1.27762	0.000126476	0.00282464	2.0729	1.05165	up
Safn004006	Phenylacetylaspartic acid	Amino acids and derivatives	Amino acids and derivatives	C12H13NO5	1	-	3.34525e+06	3.14005e+06	3.49248e+06	1.17983e+06	1.05975e+06	1.16472e+06	1.27795	0.000727927	0.00787841	2.93094	1.55136	up
pme2651	NADP+	Nucleotides and derivatives	Nucleotides and derivatives	C21H28N7O17P3	3	53-59-8	3185.71	3185.71	3185.71	36877.9	25732.1	22186.9	1.2702	0.0297612	0.0749758	0.112706	-3.14936	down
Hmhn002787	Dihydrophaseic acid-O-β-D-glucoside	Terpenoids	Sesquiterpenoids	C21H32O10	1	-	95160.5	64427.7	92223.5	220284	140117	184991	1.16009	0.0366167	0.0859378	0.461707	-1.11495	down
pma6460	4-p-Coumaroylquinic acid	Phenolic acids	Phenolic acids	C16H18O8	3	93451-44-6	17451.8	16898.5	12126.1	139851	136740	127398	1.27479	0.000153639	0.00308815	0.115044	-3.11975	down
Lmzn006582	2-Formyl-3-hydroxy-A(1)-norlup-20(29)-en-28-oic acid (Colubrinic acid)	Terpenoids	Triterpene	C30H46O4	3	-	204146	204146	204146	6.08596e+06	7.6783e+06	6.92047e+06	1.28166	0.00469045	0.0225238	0.0296082	-5.07786	down
Qmxn081901	Minheryin D	Terpenoids	Ditepenoids	C20H32O3	3	-	9354.26	9354.26	9354.26	91553.5	118718	162007	1.27203	0.0305132	0.0763874	0.0753811	-3.72965	down
mws2368	4-Hydroxyphenylethanol	Others	Alcohol compounds	C8H10O2	3	501-94-0	75118.6	66579.3	34316	31410.1	25784.6	28204.8	1.02946	0.133326	0.218986	2.06106	1.04339	up
Hmhn000927	Phloroglucinol-1-O-β-D-glucopyranoside	Others	Others	C12H16O8	1	-	428527	473710	385653	187700	204943	146027	1.23886	0.00207826	0.013569	2.39087	1.25754	up
Waqkn01592	Gallocatechin-(4α→8)-epigallocatechin*	Tannins	Proanthocyanidins	C30H26O14	2	68964-95-4	3.99615e+06	3.60923e+06	4.72574e+06	1.8505e+06	1.50125e+06	1.52865e+06	1.25172	0.0104114	0.0376093	2.52666	1.33723	up
Lmmn004491	Medicagenic acid 3-O-triglucoside	Terpenoids	Triterpene Saponin	C48H76O21	3	37838-43-0	839440	822825	698068	316429	348763	294164	1.26443	0.00461462	0.0224495	2.46033	1.29885	up
Wahln11151	Icosanedioic Acid 1-(2,3-Dihydroxypropyl) Ester	Lipids	Glycerol ester	C23H44O6	3	-	87991	95584.2	93610	41945.3	27972	36121.4	1.24502	0.000920758	0.00890382	2.614	1.38626	up
Waln010192	2-(2,3-dihydroxypropoxy)-3-(((2-(dimethylamino)ethoxy)(hydroxy)phosphoryl)oxy)propyl (8E,11Z,14Z)-octadeca-8,11,14-trienoate	Lipids	LPE	C28H52NO9P	1	-	49810.3	38632	42714.4	120990	139490	115117	1.26294	0.00289471	0.0166579	0.349196	-1.51789	down
Wbmn006297	5-Hydroxy-6,7,13-trimethoxy-2-oxatetracyclo[6.6.2.04,16.011,15]hexadeca-1(14),4,6,8(16),11(15),12-hexaen-3-one	Terpenoids	Triterpene Saponin	C18H16O6	3	-	438749	355048	390022	1.43665e+06	1.38094e+06	1.80759e+06	1.26781	0.0113476	0.039569	0.255951	-1.96606	down
Rfn049443	3-(2-Glucosyloxy-4-methoxyphenyl)propanoic acid*	Phenolic acids	Phenolic acids	C16H22O9	1	477873-63-5	181124	311161	207572	36224.8	36224.8	36224.8	1.26304	0.0382337	0.0881161	6.43994	2.68705	up
Wafn002827	Dihydroferulic acid glucoside*	Phenolic acids	Phenolic acids	C16H22O9	1	-	181124	311161	207572	36224.8	36224.8	36224.8	1.26304	0.0382337	0.0881161	6.43994	2.68705	up
MWSN0171	Apigenin 7-O-neohesperidoside	Flavonoids	Flavones	C27H30O14	3	17306-46-6	43014.4	28235.1	30297.9	2916.77	2916.77	2916.77	1.27528	0.0215985	0.0594346	11.605	3.53668	up
WaYn005296	SalicyolylSalirepin	Phenolic acids	Phenolic acids	C20H22O10	3	-	186512	192792	203380	65352.3	73259.3	96902	1.24119	0.00166731	0.0119384	2.4741	1.3069	up
pme1611	Isohemiphloin	Flavonoids	Flavanones	C21H22O10	3	3682-02-8	628294	639895	562033	62698.1	55612.3	77187.9	1.27719	0.00109998	0.00954444	9.36183	3.22679	up
Wahln02843	2,6-Dimethoxy-4-(2-Hydroxyethyl)Phenyl Beta-D-Glucopyranoside	Others	Alcohol compounds	C16H24O9	3	-	82115	50747.3	64573.9	2985.29	2985.29	2985.29	1.27732	0.0202386	0.0570313	22.0454	4.46241	up
Zbqn008252	Rubianol-g	Terpenoids	Triterpene	C30H46O4	3	-	1.5625e+07	1.4712e+07	1.47873e+07	7.57778e+06	7.67361e+06	6.93428e+06	1.27553	4.94139e-05	0.00167836	2.03394	1.02428	up
Ymln008632	Deoxyerythrolaccin	Quinones	Anthraquinone	C15H10O5	3	18499-83-7	612864	589510	639562	23430.8	23430.8	23430.8	1.28242	0.000598963	0.00714187	26.2039	4.71171	up
Lmmn006306	Machilusolide D	Others	Lactones	C18H30O3	3	-	58508.6	58508.6	58508.6	655719	680200	884184	1.279	0.0111039	0.0392206	0.0790619	-3.66087	down
Lamn006527	Drimiopsin C	Flavonoids	Other Flavonoids	C15H12O6	3	773850-90-1	1.72555e+06	3.21013e+06	2.80821e+06	134290	134290	134290	1.27204	0.0312902	0.0776461	19.2218	4.26467	up
Zbqn003921	N-carboxy-N-(2-oxo-2-phenylethyl)-L-alanine	Amino acids and derivatives	Amino acids and derivatives	C12H13NO5	2	-	3.59153e+06	3.19767e+06	3.12102e+06	1.19699e+06	1.07972e+06	1.34169e+06	1.2683	0.00102433	0.00916663	2.73883	1.45356	up
Jmcn007391	1β,3β-dihydroxy-eudesmane-5,11(13)-dien-12-oic acid	Terpenoids	Sesquiterpenoids	C15H22O4	3	-	29461.9	18111.7	18269.6	7001.74	8329.18	11453	1.15487	0.061074	0.123642	2.45831	1.29767	up
Zmdn001564	γ-Glu-Phe	Amino acids and derivatives	Amino acids and derivatives	C14H18N2O5	3	7432-24-8	68039.9	81109.4	52999.7	39233.7	29364.1	28960	1.17552	0.0354875	0.0837766	2.07209	1.05109	up
mws2220	Gallocatechin 3-O-gallate	Flavonoids	Flavanols	C22H18O11	3	5127-64-0	285899	108810	993858	49630.1	57778	48182.3	1.04385	0.267853	0.373322	8.9245	3.15777	up
Wasn004983	5-Galloyl-6-O-Benzoyl Glucose	Phenolic acids	Phenolic acids	C20H20O11	3	-	37580.1	39345.1	64041.4	7516.03	7516.03	7516.03	1.26006	0.0437725	0.0970653	6.25183	2.64428	up
Hmln101664	Nortrachelogenin-4'-O-gentiobioside	Lignans and Coumarins	Lignans	C32H42O17	3	-	168242	201263	172316	78338.3	81040.9	51036.4	1.21785	0.00148743	0.0111499	2.575	1.36458	up
Hahn000897	picrorhizin	Phenolic acids	Phenolic acids	C20H28O14	2	60824-10-4	4503.35	4503.35	4503.35	33894.2	54791.8	63072.6	1.26698	0.0337069	0.081308	0.0890234	-3.48967	down
Zbkn006749	Lappaol A	Lignans and Coumarins	Lignans	C30H32O9	3	-	138391	105824	141424	15124.8	18537.1	33193	1.23466	0.004055	0.0208606	5.7683	2.52815	up
Lmhn001386	Vnilloyltartaric acid	Phenolic acids	Phenolic acids	C12H12O9	3	-	5595.13	52092.9	10908.3	1119.03	1119.03	1119.03	1.14128	0.277018	0.383044	20.4333	4.35285	up
Lmxn007456	Acerosin	Flavonoids	Flavones	C18H16O8	1	15835-74-2	9165.73	11415.2	7244.93	14112.7	35320.5	30253.5	1.08677	0.109209	0.189349	0.349191	-1.51791	down
Lmsn000954	Dambonitol	Others	Saccharides	C8H16O6	1	523-94-4	3.85376e+06	4.07426e+06	3.98979e+06	574532	529861	520344	1.28182	0.000155778	0.00310893	7.33522	2.87484	up
WaYn005157	Gentisic acid 2-O-(6''-O-Feruloyl)Glucoside*	Phenolic acids	Phenolic acids	C23H24O12	3	-	5587.52	5587.52	5587.52	27937.6	39689.8	35689.9	1.27425	0.0139971	0.0451178	0.162243	-2.62377	down
pmn001336	Aloeemodin-8-O-glucoside	Quinones	Anthraquinone	C21H20O10	2	33037-46-6	2.55026e+06	2.19858e+06	2.26356e+06	570591	928767	600476	1.24037	0.000493504	0.00648671	3.3395	1.73963	up
MWSmce230	Methyl gallate*	Phenolic acids	Phenolic acids	C8H8O5	3	99-24-1	48325.9	46943.3	38635.3	4600.71	4600.71	4600.71	1.28016	0.00566541	0.0255488	9.70173	3.27824	up
Lmsn003582	1-O-Galloyl-4-O-p-Coumaroyl-β-D-glucose	Phenolic acids	Phenolic acids	C22H22O12	3	-	21440.1	12297.5	38928.2	2459.51	2459.51	2459.51	1.22636	0.10833	0.188327	9.84829	3.29987	up
Rfn043586	[(2S,3R,4S,5S,6R)-3,4,5-trihydroxy-6-(hydroxymethyl)oxan-2-yl](2E,4E)-5-[(1R,3S,5S,8S)-3,8-dihydroxy-1,5-dimethyl-6-oxabicyclo[3.2.1]octan-8-yl]-3-methylpenta-2,4-dienoate	Others	Others	C21H32O10	3	-	4605.26	4605.26	4605.26	41536.8	52169.6	56964.4	1.2786	0.0098387	0.0366714	0.0916951	-3.44701	down
pme1605	Kaempferol-3-O-robinobioside(Biorobin)	Flavonoids	Flavonols	C27H30O15	3	17297-56-2	11076.5	11076.5	11076.5	78023.9	55382.6	80870.7	1.27167	0.0173886	0.0516605	0.155077	-2.68894	down
Zapn004520	gnetifolin E	Others	Stilbene	C21H24O9	2	140671-07-4	191747	132324	186634	26464.8	26464.8	26464.8	1.27189	0.017043	0.0510201	6.43251	2.68538	up
Lmfn001584	Methyl 4,6-di-O-galloyl-D-glucoside	Phenolic acids	Phenolic acids	C21H22O14	3	-	240918	154885	202032	75858.2	75453.9	66513	1.2374	0.0347845	0.0825326	2.74456	1.45658	up
Wafn003070	Hydroxyferulic acid glucoside	Phenolic acids	Phenolic acids	C16H20O10	3	-	3.84162e+06	3.86514e+06	3.75434e+06	1.4119e+07	1.27164e+07	1.24371e+07	1.27982	0.00303357	0.017013	0.291835	-1.77677	down
Wayn007583	Quercetin 5-O-p-coumaroyl acetylrhamnoside	Flavonoids	Flavonols	C32H28O14	3	-	2407.24	2407.24	2407.24	12630.9	14309	12036.2	1.28023	0.00410774	0.0209605	0.185286	-2.43218	down
pmn001477	4-C-Glucose-1,3,6-trihydroxy-7-methoxyxanthone	Flavonoids	Other Flavonoids	C20H20O11	3	-	793535	729225	701955	64965.7	64965.7	64965.7	1.28201	0.00160606	0.0116927	11.4148	3.51284	up
Lakn002234	Catechin glucosyl glucoside	Flavonoids	Flavones	C27H34O16	3	-	390095	413996	438094	100402	107536	105819	1.28043	0.00162001	0.0117053	3.95906	1.98516	up
Lmtn002233	Androsin	Others	Ketone compounds	C15H20O8	1	531-28-2	42907.1	42907.1	42907.1	214536	229714	226660	1.28218	0.000657122	0.00764108	0.191861	-2.38187	down
Zbqn002456	N-(3,4,5-trihydroxycinnamicacid)-alanine	Amino acids and derivatives	Amino acids and derivatives	C12H13NO6	3	-	251316	241781	252031	19823.4	16976.6	15409.5	1.28056	3.02436e-05	0.00144102	14.2719	3.8351	up
MWSmce335	Ingenol	Terpenoids	Ditepenoids	C20H28O5	2	30220-46-3	1.0753e+06	1.27719e+06	1.62803e+06	4.81741e+06	3.63622e+06	3.937e+06	1.24238	0.00696123	0.0294128	0.321252	-1.63822	down
Lamn006238	3,9-dihydroeucomnalin glucoside*	Flavonoids	Other Flavonoids	C23H26O11	3	-	4.10811e+06	4.17219e+06	4.26171e+06	821621	821621	821621	1.28245	0.000175802	0.00346063	5.08832	2.34719	up
MWSmce454	3,5-Dihydroxyacetophenone	Others	Ketone compounds	C8H8O3	3	51863-60-6	4595.38	4595.38	4595.38	24626.6	22976.9	63956.6	1.2161	0.135409	0.221049	0.123576	-3.01653	down
Wasn001007	Isoascorbic acid 2-O-glucoside	Others	Vitamin	C12H18O11	1	-	12894.1	8557.11	9397.19	1204.05	1204.05	1204.05	1.27393	0.020733	0.0576104	8.54021	3.09427	up
Lcsn004011	Gibberellin A3	Terpenoids	Ditepenoids	C19H22O6	3	77-06-5	539169	501485	454852	99105.3	96492.5	80264.6	1.27651	0.00232095	0.014546	5.4212	2.43861	up
Qazn004045	Jasminoside F-glucoside	Terpenoids	Monoterpenoids	C22H36O13	3	-	46571.4	46571.4	46571.4	343338	240412	232857	1.26973	0.0240469	0.0641485	0.171091	-2.54716	down
HJN037	3,5-Dihydroxy-4-methoxybenzoic acid; 4-O-Methylgallic Acid*	Phenolic acids	Phenolic acids	C8H8O5	3	4319-02-2	30207.7	73839.2	19194.3	2269.27	2269.27	2269.27	1.23228	0.145529	0.234011	18.1029	4.17815	up
WaYn004519	Salicortin	Phenolic acids	Phenolic acids	C20H24O10	2	29836-41-7	1407.82	1407.82	1407.82	26712.3	7039.12	28738.8	1.20549	0.106967	0.186844	0.0675862	-3.88713	down
Zmhn003297	3-O-Digalloyl quinic acid	Phenolic acids	Phenolic acids	C21H20O14	3	-	15737.2	9321.93	11591.3	1283.55	1283.55	1283.55	1.27078	0.0282646	0.0729694	9.518	3.25066	up
MWStz724	5,7,3'-Trihydroxy-6,4',5'-trimethoxyflavone	Flavonoids	Flavones	C18H16O8	1	78417-26-2	1293.91	1293.91	1293.91	25592	28661.2	33703.8	1.28088	0.00704427	0.0296301	0.0441323	-4.50202	down
Lmmn009932	3-Hydroxy-24-methylene-9,19-cyclolanostan-26-oic acid (Ambolic acid)*	Terpenoids	Triterpene	C31H50O3	2	13878-93-8	73409.6	71655.2	66061.7	4633.33	4633.33	4633.33	1.28224	0.0011338	0.00972717	15.189	3.92495	up
Zmsn002575	Hastatoside	Terpenoids	Monoterpenoids	C17H24O11	2	50816-24-5	22461.4	22461.4	22461.4	165255	112307	183153	1.26698	0.0253218	0.0668437	0.14626	-2.77339	down
Waln006120	Octyl 6-O-Alpha-L-Arabinopyranosyl-Beta-D-Glucopyranoside	Others	Alcohol compounds	C19H36O10	1	168288-07-1	7478.12	7478.12	7478.12	115053	72781.3	62812.4	1.26774	0.0415669	0.0941025	0.0895058	-3.48187	down
MWSmce439	Dihydrocoumarin	Lignans and Coumarins	Coumarins	C9H8O2	3	119-84-6	95996.2	65674.6	81741.4	29725.5	42605.5	43529.1	1.17176	0.0232285	0.0626701	2.10091	1.07102	up
Zjbn102207	Dactylorhin E	Others	Others	C27H40O16	2	-	5037.75	5037.75	5037.75	25188.7	41534.8	101394	1.20532	0.158604	0.248919	0.0898969	-3.47558	down
Lakn002368	2-Hydroxy-5-methylbenzoyl-1-O-glucose	Phenolic acids	Phenolic acids	C14H18O8	1	-	7340.62	7340.62	7340.62	52589.8	49846.8	36703.1	1.27312	0.0154081	0.0478571	0.158272	-2.65953	down
Zbkn008746	Prenyl caffeate	Phenolic acids	Phenolic acids	C14H16O4	3	118971-61-2	898.945	898.945	898.945	4900.44	21138.1	37031.7	1.18176	0.162259	0.253102	0.0427592	-4.54762	down
Wafn002807	methyl 4-O-galloylchlorogenate	Phenolic acids	Phenolic acids	C24H24O13	3	574747-58-3	8814.66	11242.5	10032.7	973.876	973.876	973.876	1.28026	0.00593603	0.0262641	10.299	3.36443	up
Laln006487	Benzyl 3,6-dimethoxy-2-{[3,4,5-trihydroxy-6-(hydroxymethyl)oxan-2-yl]oxy}benzoate	Phenolic acids	Phenolic acids	C22H26O10	1	-	689991	640100	658438	128020	128020	128020	1.28211	0.000741316	0.00796208	5.17765	2.3723	up
Zmsn005057	Cornuside	Terpenoids	Monoterpenoids	C24H30O14	2	131189-57-6	19037.6	16196.9	8657.71	945.91	945.91	945.91	1.26264	0.047591	0.102858	15.4674	3.95115	up
MWSslk030	Neohesperidin Dihydrochalcone (Nhdc)	Flavonoids	Chalcones	C28H36O15	1	20702-77-6	73674.9	57444.2	70586.8	217207	263796	238556	1.26867	0.00265265	0.0157813	0.280319	-1.83486	down
Lmbn005662	9(10)-EpOME;(9R,10S)-(12Z)-9,10-Epoxyoctadecenoic acid	Lipids	Free fatty acids	C18H32O3	1	16833-56-0	66858.4	68609.4	54158.1	23553.1	17864.1	19992.5	1.25918	0.00585587	0.0260323	3.08788	1.62662	up
mws0921	4-Coumaryl alcohol	Others	Alcohol compounds	C9H10O2	3	3690-05-9	151407	157116	134325	50394.3	71249	91713.1	1.1586	0.00973042	0.0365573	2.07562	1.05354	up
Zmdn004052	Aloe emodin-1-O-glucoside	Quinones	Anthraquinone	C21H20O10	2	266997-58-4	20486.8	20486.8	20486.8	106820	102434	143471	1.27304	0.0174864	0.0518512	0.174244	-2.52082	down
Lcfn121033	(3S,5R,6R,7E,9S)-megastigm-7-ene-3,5,6,9-tetrol3-(beta-D-glucopyranoside)	Others	Others	C18H30O10	1	-	5.20483e+06	4.21877e+06	3.87485e+06	774969	774969	774969	1.2761	0.0116656	0.0404272	5.71999	2.51601	up
Lmdn001925	Olivil-4'-O-glucoside	Lignans and Coumarins	Lignans	C26H34O12	2	76880-93-8	124990	84324	69809.6	13374.3	13374.3	13374.3	1.26241	0.0403865	0.0919479	6.9567	2.7984	up
Zbnn005416	Eriodictyol-7-O-(6''-acetyl)glucoside	Flavonoids	Flavanones	C23H24O12	3	-	1233.78	1233.78	1233.78	16026.4	9498.23	6168.9	1.2393	0.0842802	0.155638	0.116785	-3.09807	down
Sakn004920	Isolugrandoside	Phenolic acids	Phenolic acids	C29H36O16	3	-	240362	243188	378452	73238.2	80443.7	36790.8	1.20098	0.0306553	0.0766111	4.5256	2.17811	up
Wbtn004165	1,6-dihydroxy-3,7-dimethoxy-8-(3-methoxy-3-methylbutyl)-2-(3-methylbut-2-en-1-yl)xanthen-9-one	Flavonoids	Other Flavonoids	C26H32O7	2	-	157319	190323	120974	819764	446542	223650	1.01849	0.187916	0.282632	0.314516	-1.66879	down
Wmmp000181	1´-O-Benzoylsucrose	Phenolic acids	Phenolic acids	C19H26O12	2	-	66964	97471.7	74808.5	11323.8	11323.8	11323.8	1.27427	0.0174038	0.0516605	7.04249	2.81609	up
Li512115	Isochlorogenic acid B	Phenolic acids	Phenolic acids	C25H24O12	3	14534-61-3	143576	131841	163723	5396.65	5396.65	5396.65	1.2816	0.00433235	0.0216202	27.1242	4.76151	up
Lmxn002084	Dihydrocatalpol	Terpenoids	Terpene	C15H24O10	3	6736-86-3	4137.12	4137.12	4137.12	42881	20685.6	57214.1	1.23602	0.0767063	0.146043	0.10276	-3.28266	down
Wcdn001824	2,5-Dihydroxybenzoic acid-5-O-glucoside	Phenolic acids	Phenolic acids	C13H16O9	2	-	193765	186216	146279	29255.7	29255.7	29255.7	1.27647	0.0100075	0.0369569	5.99609	2.58402	up
pme3351	L-2-Aminoadipate 6-semialdehyde	Amino acids and derivatives	Amino acids and derivatives	C6H11NO3	3	1962-83-0	258440	289798	290145	133906	120129	136290	1.26957	0.00126899	0.0103232	2.14791	1.10293	up
Lmsn004090	1-O-Galloyl-3-O-p-Coumaroyl-β-D-glucose	Phenolic acids	Phenolic acids	C22H22O12	3	-	28708.7	17965.8	32262.8	1507.63	1507.63	1507.63	1.27232	0.0287303	0.0735641	17.4528	4.12539	up
Zbbn005427	10-O-(3-Methylferuloyl)-geniposide	Terpenoids	Monoterpenoids	C27H32O13	3	-	7753.68	15688.7	6273.74	347.81	347.81	347.81	1.26467	0.0821715	0.153234	28.4792	4.83184	up
Wafn003834	Hydroxygeranyl 6-O-xylopyranosyl-glucopyranoside	Terpenoids	Monoterpenoids	C21H36O11	3	-	14251	14251	14251	150219	117438	71255.1	1.2535	0.0498394	0.106571	0.126148	-2.98681	down
Ydyn013925	Methyl oleanolate*	Terpenoids	Triterpene	C31H50O3	2	1724-17-0	79193.8	154104	99548	15838.8	15838.8	15838.8	1.25663	0.0510873	0.10858	7.00488	2.80836	up
MWSslk049	Silymarin	Flavonoids	Flavanonols	C25H22O10	3	22888-70-6	687523	703320	672512	309175	231647	282941	1.26098	0.000998126	0.00908973	2.50479	1.32469	up
MWS2687	16-HETE; 16-Hydroxy-5,8,11,14-eicosatetraenoic acid	Lipids	Free fatty acids	C20H32O3	3	128914-46-5	5609.11	15875.9	14385.1	1121.82	1121.82	1121.82	1.23113	0.077376	0.14692	10.6583	3.4139	up
Safn004850	3'-O-β-Glucopyranosyl plumbagic acid methyl ester	Phenolic acids	Phenolic acids	C18H24O10	3	-	56025.5	51852.9	147638	10111.5	10111.5	10111.5	1.21585	0.138315	0.224075	8.42333	3.07439	up
Lmln001195	Picein	Phenolic acids	Phenolic acids	C14H18O7	1	530-14-3	30605.4	36905.8	15219	109047	65373	72297.1	1.12331	0.0385987	0.0888844	0.335325	-1.57637	down
MWStz518	Regaloside A*	Phenolic acids	Phenolic acids	C18H24O10	3	114420-66-5	2371.95	2371.95	2371.95	11859.7	23739.3	20404.6	1.25572	0.0440356	0.0973791	0.12706	-2.97642	down
Lmjn003127	Euphorbioside A	Terpenoids	Sesquiterpenoids	C19H32O9	3	403805-90-3	270157	251306	288388	3658.07	3658.07	3658.07	1.28233	0.00161222	0.0116927	73.7959	6.20547	up
Lmhn003240	Benzoylmalic acid	Phenolic acids	Phenolic acids	C11H10O6	3	22138-51-8	143571	185417	135819	9516.51	9516.51	9516.51	1.27959	0.0110359	0.0391122	16.2807	4.02509	up
Lmgn002184	2-Oxoheptanedionic acid	Organic acids	Organic acids	C7H10O5	3	17126-90-8	7581.89	7581.89	7581.89	131614	94929.8	136428	1.27803	0.0130901	0.0434896	0.0626651	-3.99619	down
mws0028	Vanillate	Phenolic acids	Phenolic acids	C8H8O4	3	121-34-6	249550	238665	338159	30688.7	30688.7	30688.7	1.27608	0.016169	0.0494024	8.97587	3.16605	up
MWStz539	Chrysoeriol-7-O-glucoside	Flavonoids	Flavones	C22H22O11	1	19993-32-9	2.66045e+06	2.72878e+06	2.71748e+06	924671	878189	907480	1.28198	1.54656e-06	0.00060147	2.99103	1.58064	up
pmn001338	Rhein-8-O-glucoside	Quinones	Anthraquinone	C21H18O11	2	34298-86-7	6838.9	6838.9	6838.9	39215.5	45250.4	34194.5	1.27719	0.00940963	0.0357337	0.172903	-2.53197	down
Zapn010603	xanthogalenol	Flavonoids	Chalcones	C21H22O5	3	265659-35-6	66362.9	62727.1	71178.6	3514.63	3514.63	3514.63	1.28215	0.00149459	0.0111499	18.9938	4.24746	up
Yyyn008289	5,3'-Dihydroxy-7,4'-Dimethoxyflavone	Flavonoids	Flavones	C17H14O6	3	32174-62-2	1.00947e+06	1.03305e+06	1.02834e+06	356448	332476	307737	1.27885	2.76738e-05	0.0013816	3.08115	1.62347	up
Lcsn000648	ent-3α,16β,17,19-Tetrahydroxykauran-19-ylacetate-17-O-β-D-glucopyranoside	Terpenoids	Ditepenoids	C28H46O10	3	-	84375.3	85049.7	50687.4	27732	10655.2	11041.8	1.16811	0.0216548	0.0595084	4.4531	2.15481	up
Wasn006047	Glucosyl 10,11-dihydroxy-2,6-farneSadienoate	Terpenoids	Sesquiterpenoids	C21H36O9	1	-	286872	322080	281957	16773.8	16773.8	16773.8	1.28205	0.00202729	0.0133945	17.7044	4.14604	up
Lmhn003223	Cinnamoyltartaric acid	Phenolic acids	Phenolic acids	C13H12O7	3	-	20314.7	12991.2	15609	1645.87	1645.87	1645.87	1.27427	0.0207014	0.0576104	9.90661	3.30839	up
Zbfn005095	2-(3,4-dihydroxyphenethoxy)6-mustardyl-O-glucosyl-D-xylose	Phenolic acids	Phenolic acids	C30H38O16	2	-	21145.8	24909.9	21313.2	3520.64	3520.64	3520.64	1.28049	0.00417771	0.0210089	6.37848	2.67321	up
Wbtn005631	1,3,7-trihydroxy-2-[3,4,5-trihydroxy-6-(hydroxymethyl)oxan-2-yl]xanthen-9-one	Flavonoids	Other Flavonoids	C19H18O10	2	-	1.69706e+06	1.89735e+06	1.865e+06	83042	83042	83042	1.28225	0.0012751	0.0103404	21.9142	4.4538	up
MWSslk186	8-O-Acetylharpagide	Terpenoids	Monoterpenoids	C17H26O11	3	6926-14-3	2681.67	2681.67	2681.67	50907	15987	45524.6	1.23066	0.0850998	0.156619	0.0715629	-3.80464	down
Walbn03514	tetrahydrodehydrodiconiferyl alcohol glucoside	Lignans and Coumarins	Lignans	C26H36O11	2	-	709594	604915	473335	94666.9	94666.9	94666.9	1.27211	0.0180883	0.053132	6.29521	2.65425	up
Labn004065	4-Hydroxybenzoyl acetyl glucoside	Phenolic acids	Phenolic acids	C15H18O9	3	-	131189	150635	156358	60583.7	60021.7	70201.4	1.26293	0.00321935	0.0177285	2.29647	1.19942	up
Wmzn002116	3,5-Dicaffeoylquinic acid	Phenolic acids	Phenolic acids	C25H24O12	2	-	28235.1	59559.2	59660.3	5647.01	5647.01	5647.01	1.24818	0.0532186	0.112262	8.70399	3.12168	up
mws2623	11-Octadecanoic acid(Vaccenic acid)*	Lipids	Free fatty acids	C18H34O2	2	506-17-2	65794.3	65794.3	65794.3	423236	414604	328971	1.2773	0.00855747	0.0337738	0.169164	-2.5635	down

## Sheet: P-DFH VS P-DL
Differential metabolite list for the P-DFH vs. P-DHL comparison.
Index	Compounds		Class I	Class II	Formula	Level	CAS	P-DFH-1	P-DFH-2	P-DFH-3	P-DL-1	P-DL-2	P-DL-3	VIP	P-value	FDR	Fold_Change	Log2FC	Type
zjbp110810	6,8-dihydroxy-2-[2-(3'-hydroxy-4'-methoxyphenyl)ethyl]chromone		Others	Chromone	C18H16O6	1	-	197188	199201	206739	703676	693170	692882	1.24472	7.58761e-08	0.00010801	0.288616	-1.79278	down
Layp006138	5-Hydroxy-3',4',7-trimethoxyflavone glucoside		Flavonoids	Flavones	C24H26O11	2	-	533541	519567	717799	1.55261e+06	1.47043e+06	1.30721e+06	1.20615	0.000959121	0.0074607	0.408961	-1.28996	down
pme0170	N-Acetyl-L-Arginine		Amino acids and derivatives	Amino acids and derivatives	C8H16N4O3	3	155-84-0	2.42653e+06	3.11851e+06	3.33878e+06	8.41192e+06	8.85585e+06	9.19083e+06	1.22492	0.000102544	0.00232551	0.335763	-1.57448	down
Zjhp090604	5,7-dihydroxy-3-(4'-hydroxybenzyl)-chroman-4-one		Flavonoids	Other Flavonoids	C16H14O5	1	-	620364	428266	666296	2.26988e+06	2.31868e+06	2.14799e+06	1.22058	0.000105541	0.00233227	0.254571	-1.97386	down
mws0120	sn-Glycero-3-phosphocholine		Lipids	PC	C8H20NO6P	1	28319-77-9	2.10369e+07	2.17246e+07	2.38352e+07	6.6754e+06	7.04221e+06	6.45923e+06	1.24158	0.00213626	0.0109584	3.30065	1.72275	up
pmb0962	L-Lysine-Butanoic Acid		Amino acids and derivatives	Amino acids and derivatives	C10H22N2O4	3	80407-71-2	2.38048e+06	1.69815e+06	1.92922e+06	294406	528084	426668	1.20856	0.00952995	0.0303487	4.80952	2.26589	up
Lcsp000435	Glu-Ser		Amino acids and derivatives	Amino acids and derivatives	C8H14N2O6	3	5875-38-7	2.38048e+06	1.69815e+06	1.92922e+06	294406	528084	426668	1.20856	0.00952995	0.0303487	4.80952	2.26589	up
MWS5209	N-Methyl-α-aminoisobutyric acid		Amino acids and derivatives	Amino acids and derivatives	C5H11NO2	3	2566-34-9	2.38048e+06	1.69815e+06	1.92922e+06	294406	528084	426668	1.20856	0.00952995	0.0303487	4.80952	2.26589	up
Ladp002935	3-quinolinecarboxylic acid		Alkaloids	Quinoline alkaloids	C10H7NO3	1	-	3.92053e+07	3.99466e+07	3.79267e+07	5.53571e+06	5.37201e+06	5.84611e+06	1.24454	0.000157271	0.00300958	6.98817	2.80491	up
WaQzp09970	Estrane-3,17-diol		Steroids	Steroid	C18H30O2	3	517-01-1	1.52153e+06	1.3861e+06	1.7057e+06	3.45555e+06	3.78841e+06	4.41101e+06	1.22048	0.00847673	0.0281273	0.395825	-1.33707	down
Zmdp000972	S-Methyl-L-cysteine		Amino acids and derivatives	Amino acids and derivatives	C4H9NO2S	2	1187-84-4	6.34569e+06	6.43303e+06	6.05243e+06	1.58805e+07	1.66154e+07	1.4923e+07	1.24134	0.00169005	0.00958482	0.397123	-1.33234	down
Waptp01054	4-(2-aminoethenyl)phenol*		Alkaloids	Alkaloids	C8H9NO	1	-	6.34569e+06	6.43303e+06	6.05243e+06	1.58805e+07	1.66154e+07	1.4923e+07	1.24134	0.00169005	0.00958482	0.397123	-1.33234	down
pmp000169	Andrographidine D aglycone		Flavonoids	Flavanones	C19H18O7	2	-	114330	103859	136904	283591	269329	251252	1.21722	0.000381243	0.0046987	0.441563	-1.17931	down
Zmjp008503	5-Hydroxy-4',6,7-trimethoxyflavone (Salvigenin)		Flavonoids	Flavones	C18H16O6	1	19103-54-9	129604	85941.7	87529.6	377378	402957	355171	1.21903	0.000153833	0.00300958	0.266907	-1.90559	down
pmp000163	Andrographidine E aglycone		Flavonoids	Flavones	C18H16O6	2	1165-40-8	1.25137e+07	1.04404e+07	1.1879e+07	4.48397e+07	4.28534e+07	3.98017e+07	1.239	0.000581439	0.00589327	0.273212	-1.87191	down
Lmsp011263	6-Hydroxy-5,7,4'-trimethoxyflavone		Flavonoids	Flavones	C18H16O6	1	6938-19-8	271188	243680	294287	1.05795e+06	903195	994037	1.2375	0.00186226	0.0100796	0.273809	-1.86876	down
Cmsp008043	Dihydropinosylvin methyl ether*		Phenolic acids	Phenolic acids	C15H16O2	1	17635-59-5	1.34447e+07	1.8535e+07	1.93774e+07	4.07173e+07	4.03166e+07	4.25848e+07	1.20476	0.00248644	0.012163	0.415448	-1.26726	down
Lmbp007051	6-Hydroxy-2-[2-(3'-methoxy-4'-hydroxyphenylethyl)]chromone*		Others	Chromone	C18H16O5	3	-	2.18114e+06	1.63109e+06	3.35579e+06	7.99267e+06	8.96603e+06	9.15536e+06	1.1855	0.000893276	0.00712369	0.274489	-1.86518	down
Zbjp006709	1,7-bis(4-hydroxy-3-methoxyphenyl)hept-1-ene-3-ol		Others	Ketone compounds	C21H26O5	3	-	3.36823e+07	2.72957e+07	6.18855e+07	1.40052e+08	1.66304e+08	1.85597e+08	1.17175	0.00226472	0.0114118	0.249746	-2.00146	down
mws0040	Chrysin		Flavonoids	Flavones	C15H10O4	1	480-40-0	1.08209e+07	1.02563e+07	9.2405e+06	1.6127e+08	1.72824e+08	1.73958e+08	1.24426	0.000560901	0.00578582	0.0596744	-4.06674	down
Hamp007385	5-hydroxy-7,8-dimethoxyflavanone		Others	Others	C17H16O5	2	-	598980	333644	535782	2.42029e+06	2.32369e+06	2.25076e+06	1.21393	0.000150753	0.00298051	0.20993	-2.25202	down
mws0051	Acacetin*		Flavonoids	Flavones	C16H12O5	1	480-44-4	1.28209e+06	909725	1.07517e+06	9.42487e+06	9.10849e+06	1.00783e+07	1.23943	0.000307299	0.00430976	0.114184	-3.13057	down
Lagp008266	Anhydrotuberosin		Flavonoids	Isoflavones	C20H16O4	3	41347-49-3	614184	929042	601179	2.24938e+06	2.14629e+06	2.28314e+06	1.20905	0.00196592	0.0104033	0.321076	-1.63901	down
MWS20189	Tectorigenin*		Flavonoids	Isoflavones	C16H12O6	3	548-77-6	1.80676e+06	1.86299e+06	1.83615e+06	1.19543e+07	1.29002e+07	1.26855e+07	1.2447	0.000693451	0.00626748	0.146667	-2.76938	down
Lmjp004941	3,5,4'-Trihydroxy-7-methoxyflavone (Rhamnocitrin)*		Flavonoids	Flavonols	C16H12O6	3	569-92-6	1.80676e+06	1.86299e+06	1.83615e+06	1.19543e+07	1.29002e+07	1.26855e+07	1.2447	0.000693451	0.00626748	0.146667	-2.76938	down
MWSHY0069	Hispidulin (5,7,4'-Trihydroxy-6-methoxyflavone)*		Flavonoids	Flavones	C16H12O6	3	1447-88-7	1.80676e+06	1.86299e+06	1.83615e+06	1.19543e+07	1.29002e+07	1.26855e+07	1.2447	0.000693451	0.00626748	0.146667	-2.76938	down
Zmjp004795	5,6,7-Trihydroxy-8-methoxyflavone*		Flavonoids	Flavones	C16H12O6	3	-	1.80676e+06	1.86299e+06	1.83615e+06	1.19543e+07	1.29002e+07	1.26855e+07	1.2447	0.000693451	0.00626748	0.146667	-2.76938	down
Lmjp005871	Penduletin (5,4'-Dihydroxy-3,6,7-trimethoxyflavone)		Flavonoids	Flavonols	C18H16O7	3	569-80-2	1.54581e+06	1.56391e+06	1.40208e+06	5.06988e+06	5.35258e+06	5.16467e+06	1.24281	1.68029e-05	0.000896507	0.289457	-1.78858	down
mws1474	5,7-Dihydroxy-3',4',5'-trimethoxyflavone		Flavonoids	Flavones	C18H16O7	3	18103-42-9	1.2426e+06	1.18306e+06	1.28833e+06	4.66064e+06	4.47813e+06	4.80684e+06	1.24359	0.000272153	0.00401326	0.266319	-1.90877	down
pma0253	O-MethylChrysoeriol-5-O-glucoside		Flavonoids	Flavones	C23H24O11	3	-	1.40818e+06	1.61711e+06	1.62535e+06	7.00738e+06	6.66999e+06	6.90515e+06	1.24242	4.87609e-06	0.000475664	0.225951	-2.14592	down
pmp000006	Eupatilin*		Flavonoids	Flavones	C18H16O7	1	22368-21-4	65176.3	73950.9	74718	387465	327108	309874	1.2386	0.006754	0.0243488	0.208742	-2.26021	down
Smbp005175	Rivularin*		Flavonoids	Flavones	C18H16O7	1	70028-59-0	65176.3	73950.9	74718	387465	327108	309874	1.2386	0.006754	0.0243488	0.208742	-2.26021	down
HJAP058	5,6,7,4'-Tetramethoxyflavanone		Flavonoids	Flavanones	C19H20O6	2	2569-77-9	249540	290213	197537	902958	898314	886773	1.22735	0.00126953	0.0084763	0.274284	-1.86626	down
Wbtp006612	2,3,6,8-tetrahydroxy-1-(3-methylbut-2-en-1-yl)xanthen-9-one		Flavonoids	Other Flavonoids	C18H16O6	3	-	212750	215501	203165	916311	1.04537e+06	1.03447e+06	1.24297	0.00256009	0.0124167	0.210742	-2.24645	down
Lmsp009300	5,6-Dihydroxy-7,4'-dimethoxyflavone (Ladanein)		Flavonoids	Flavones	C17H14O6	1	10176-71-3	715133	581164	631465	5.05183e+06	4.65038e+06	4.96856e+06	1.24248	0.000296195	0.00419535	0.131402	-2.92795	down
pmp001251	LysoPC 18:2(2n isomer)		Lipids	LPC	C26H50NO7P	1	-	1.71561e+07	1.73356e+07	2.04235e+07	6.29201e+07	4.61945e+07	4.77519e+07	1.21675	0.0204268	0.0520637	0.350077	-1.51426	down
Zbsp005521	Chrysin-5-O-glucoside (Toringin)*		Flavonoids	Flavones	C21H20O9	1	1329-10-8	1.08753e+07	1.04756e+07	1.08298e+07	1.48088e+06	1.35519e+06	1.22329e+06	1.24327	3.90991e-06	0.000475664	7.92753	2.98687	up
Lamp009626	3-(4-methoxybenzylidene)-5,7-dihydroxy-6-methoxychroman-4-one glucoside		Flavonoids	Other Flavonoids	C24H26O11	2	-	3.51155e+06	3.63708e+06	3.31818e+06	8.21684e+06	8.05652e+06	8.0067e+06	1.24246	7.34505e-06	0.000565172	0.431087	-1.21395	down
Layp007667	Bauhinoxepin I		Others	Alcohol compounds	C16H14O5	3	-	581521	413109	579605	2.20928e+06	2.33315e+06	2.25277e+06	1.23016	4.49567e-05	0.00154207	0.231669	-2.10987	down
Lahp002608	3,5-Dihydro-2H-Furo[3,2-C]Quinolin-4-One*		Alkaloids	Quinoline alkaloids	C11H9NO2	1	-	5.24111e+06	5.09848e+06	5.22062e+06	2.38731e+06	2.31685e+06	2.267e+06	1.24398	1.69028e-06	0.000320815	2.23208	1.15839	up
Wcdp001953	2-methyl-1-nitronaphthalene		Others	Others	C11H9NO2	1	881-03-8	5.24111e+06	5.09848e+06	5.22062e+06	2.38731e+06	2.31685e+06	2.267e+06	1.24398	1.69028e-06	0.000320815	2.23208	1.15839	up
Smcp001137	naphthisoxazol A*		Alkaloids	Alkaloids	C11H9NO2	1	-	4.49056e+06	4.93586e+06	4.4315e+06	2.03775e+06	1.85826e+06	1.92869e+06	1.23886	0.00161927	0.00931324	2.37916	1.25045	up
Hmmp001310	3-Indoleacrylic acid*		Alkaloids	Plumerane	C11H9NO2	1	1204-06-4	4.49056e+06	4.93586e+06	4.4315e+06	2.03775e+06	1.85826e+06	1.92869e+06	1.23886	0.00161927	0.00931324	2.37916	1.25045	up
Lahp001956	Pyran[3,4-b]indole-2-ketone		Alkaloids	Plumerane	C11H9O2N	3	-	4.49056e+06	4.93586e+06	4.4315e+06	2.03775e+06	1.85826e+06	1.92869e+06	1.23886	0.00161927	0.00931324	2.37916	1.25045	up
Hmgp002327	3-amino-2-naphthoic acid*		Alkaloids	Alkaloids	C11H9NO2	1	-	5.24111e+06	5.09848e+06	5.22062e+06	2.38731e+06	2.31685e+06	2.267e+06	1.24398	1.69028e-06	0.000320815	2.23208	1.15839	up
pmp000172	5,2'-Dihydroxy-7,8-dimethoxyflavone glucoside*		Flavonoids	Flavones	C23H24O11	1	-	1.8662e+06	2.41087e+06	2.62918e+06	4.82288e+06	6.07446e+06	4.2467e+06	1.16617	0.0233282	0.0566202	0.456037	-1.13278	down
MWStz583	5-Hydroxy-7,3',4'-trimethoxyflavone		Flavonoids	Flavones	C18H16O6	1	29080-58-8	169640	178725	202529	759620	785246	703944	1.24033	0.000457246	0.00512512	0.244971	-2.02932	down
Waqkp05977	2-g-linolenoyl-glycerol		Lipids	Glycerol ester	C21H36O4	2	-	1.0478e+06	856674	884885	4.31285e+06	4.05238e+06	3.65174e+06	1.23783	0.0019707	0.0104075	0.232118	-2.10707	down
Zmjp005262	2-Hydroxyl emodin-1-methyl ether		Quinones	Anthraquinone	C16H12O6	3	346434-45-5	158667	147491	147908	1.02654e+06	1.0587e+06	1.08911e+06	1.24452	0.000243833	0.00380249	0.143042	-2.80549	down
Wbkp008219	(3S,3'S)-N,N'-((1R,2R)-5-((3,4,5-trihydroxy-6-methyltetrahydro-2H-pyran-2-yl)oxy)cyclohex-3-ene-1,2-diyl)bis(2-methyl-2,3,4,9-tetrahydro-1H-pyrido[3,4-b]indole-3-carboxamide)		Alkaloids	Alkaloids	C38H46N6O7	3	-	6.3269e+06	7.86379e+06	7.52437e+06	2.19176e+07	2.4783e+07	2.47299e+07	1.23474	0.00065525	0.0061365	0.304003	-1.71784	down
Zmjp006741	Chrysosplenoside E*		Flavonoids	Flavonols	C25H28O13	1	-	943427	735548	791004	2.3057e+06	2.26475e+06	2.30936e+06	1.23227	0.0011177	0.00805589	0.359018	-1.47787	down
Zmjp006451	3,6,7,4'-tetramethylquercetagetin 3'-O-beta-D-glucoside*		Flavonoids	Flavonols	C25H28O13	1	-	904835	859182	831637	2.25911e+06	2.17269e+06	2.18025e+06	1.24295	5.13637e-06	0.000475664	0.392564	-1.349	down
Zmjp004311	Chrysosplenetin-4'-O-glucoside*		Flavonoids	Flavonols	C25H28O13	1	23279-19-8	904835	859182	831637	2.25911e+06	2.17269e+06	2.18025e+06	1.24295	5.13637e-06	0.000475664	0.392564	-1.349	down
MWS4354	N6-methyladenosine		Nucleotides and derivatives	Nucleotides and derivatives	C11H15N5O4	3	1867-73-8	291484	327656	288168	751760	816782	742816	1.23797	0.000336564	0.00443609	0.392543	-1.34908	down
Zazp002547	cyclo-(Gly-Phe)		Amino acids and derivatives	Amino acids and derivatives	C11H12N2O2	2	10125-07-2	4.71851e+06	4.86826e+06	4.71329e+06	1.88493e+06	1.87304e+06	1.91729e+06	1.24461	0.000136584	0.00277908	2.51972	1.33326	up
Hmhp005846	Tenaxin I*		Flavonoids	Flavones	C18H16O7	1	86926-52-5	69693	70948.4	66986.5	378974	285397	322961	1.23791	0.0106577	0.0326616	0.210292	-2.24953	down
Zmhp004065	7,8-Dihydroxy-5,6,4'-trimethoxyflavone*		Flavonoids	Flavones	C18H16O7	1	-	69693	70948.4	66986.5	378974	285397	322961	1.23791	0.0106577	0.0326616	0.210292	-2.24953	down
Wcjp002598	8-hydroxyquinoline		Alkaloids	Quinoline alkaloids	C9H7NO	1	148-24-3	6.32903e+07	6.4423e+07	5.41511e+07	3.10337e+07	2.8166e+07	2.61159e+07	1.22156	0.00402029	0.0169316	2.13166	1.09198	up
Hasp010605	MG(18:3(9Z,12Z,15Z)/0:0/0:0)		Lipids	Glycerol ester	C21H36O4	1	129828-41-7	919792	732950	883779	5.34014e+06	4.1977e+06	4.58276e+06	1.23676	0.00625463	0.0232876	0.179633	-2.47688	down
Zbsp005869	7,4'-Dihydroxy-3,5,3'-trimethoxyflavone*		Flavonoids	Flavonols	C18H16O7	2	13459-09-1	13784.3	15333.4	16455.7	72291	107352	68706.8	1.22567	0.0312655	0.0701441	0.183505	-2.44611	down
Wbmp010360	[(1S,2R,3R,4S,5R,6S,8R,12R,13S,16R,19S,20R,21S)-14-ethyl-4,6,19-trimethoxy-16-methyl-9,11-dioxa-14-azaheptacyclo[10.7.2.12,5.01,13.03,8.08,12.016,20]docosan-21-yl]3,5-dinitrobenzoate		Alkaloids	Alkaloids	C32H41N3O11	3	-	1.35427e+06	2.08348e+06	2.90413e+06	620838	533433	413106	1.16861	0.0683377	0.124001	4.04618	2.01656	up
Zmjp005959	Chrysosplenoside A*		Flavonoids	Flavonols	C24H26O13	1	-	249004	273924	287029	1.46797e+06	1.50074e+06	1.23497e+06	1.24005	0.0048104	0.0191007	0.192678	-2.37574	down
mws0520	N-Acetyl-L-tyrosine		Amino acids and derivatives	Amino acids and derivatives	C11H13NO4	1	537-55-3	5.56117e+06	5.4942e+06	4.46283e+06	2.37226e+06	2.0762e+06	2.2527e+06	1.22214	0.0108656	0.0331204	2.31575	1.21148	up
Qacp006853	1-Methoxy-2,3-methylenedioxy-xanthone-glucoside		Others	Xanthone	C23H24O10	3	-	228027	350035	263612	622086	603763	719684	1.18545	0.00196537	0.0104033	0.432618	-1.20883	down
Wahlp08143	3,4-Didehydro Retinol		Others	Others	C20H28O	2	-	3.29941e+07	3.37291e+07	3.3894e+07	7.08823e+07	6.7971e+07	7.20524e+07	1.24342	0.000653478	0.0061365	0.477072	-1.06772	down
Lmxp001668	2-Methoxy-4-ethenylphenol		Others	Others	C9H10O2	1	7786-61-0	2.89954e+07	2.81819e+07	2.66497e+07	1.23473e+07	1.45645e+07	1.40481e+07	1.23023	0.000119161	0.00255077	2.04656	1.0332	up
Zmdp006307	sanshodiol*		Lignans and Coumarins	Lignans	C20H22O6	1	-	502956	280540	674828	2.26856e+06	2.36286e+06	2.0763e+06	1.18251	0.00039719	0.00470397	0.21741	-2.20151	down
Zmhp003514	6,7,8-Tetrahydroxy-5-methoxyflavone*		Flavonoids	Flavones	C16H12O6	3	-	2.03503e+06	1.98781e+06	2.21194e+06	1.2941e+07	1.38857e+07	1.3219e+07	1.24401	0.000324247	0.00439587	0.155692	-2.68324	down
Lhnp102928	10-Hydroxyligustroside		Terpenoids	Monoterpenoids	C25H32O13	2	-	101440	101204	112243	280424	187764	164997	1.12024	0.0936206	0.155779	0.497306	-1.00779	down
MW0155820	Pro-Cys-Gln		Amino acids and derivatives	Amino acids and derivatives	C13H22N4O5S1	3	-	592157	566705	379095	939235	1.38575e+06	1.28546e+06	1.14346	0.0206307	0.0523958	0.425974	-1.23116	down
Layp008066	3-Methoxy-5-(2-phenylethyl)phenol*		Phenolic acids	Phenolic acids	C15H16O2	1	-	1.19564e+07	1.41044e+07	1.61304e+07	3.60422e+07	3.12167e+07	3.36201e+07	1.21628	0.000495103	0.00535954	0.418236	-1.25761	down
pmc0960	LysoPC 20:4		Lipids	LPC	C28H50NO7P	3	-	6.29444e+06	6.10008e+06	7.2211e+06	2.66508e+06	2.72353e+06	2.69436e+06	1.23662	0.0078826	0.0271036	2.42678	1.27905	up
Wbmp010456	Macrophypene B		Terpenoids	Ditepenoids	C18H28O2	3	-	978657	959699	1.25084e+06	4.74127e+06	5.2544e+06	5.58616e+06	1.23573	0.00126369	0.00846523	0.204674	-2.2886	down
Wbmp010544	10-Hydroxymethyllycaconitine		Alkaloids	Alkaloids	C37H50N2O11	1	-	5.76579e+06	8.25858e+06	7.47265e+06	2.82144e+07	2.40115e+07	2.14084e+07	1.21709	0.00679461	0.0243938	0.291943	-1.77624	down
pma1303	LysoPC 16:2*		Lipids	LPC	C24H46NO7P	3	-	446466	327979	424761	69997.9	119026	76729	1.20842	0.00625587	0.0232876	4.51248	2.17392	up
Hmcp002298	Limocitrin-3-O-arabinoside		Flavonoids	Flavonols	C22H22O12	3	-	53267.5	54813.8	194177	336151	376727	366630	1.07544	0.0248774	0.0592477	0.279996	-1.83652	down
mws0675	Nicotinamide D-ribonucleotide		Nucleotides and derivatives	Nucleotides and derivatives	C11H15N2O8P	3	1094-61-7	870245	1.22666e+06	1.67748e+06	530915	536482	520404	1.13254	0.0891044	0.150518	2.37711	1.24921	up
NK10251888	NG,NG-Dimethyl-L-arginine*		Amino acids and derivatives	Amino acids and derivatives	C8H18N4O2	1	30315-93-6	9.36763e+06	9.23266e+06	9.06928e+06	2.69661e+07	2.77993e+07	2.75984e+07	1.24475	4.13817e-05	0.00151043	0.335943	-1.57371	down
MW0148044	Cys-Met-Asp		Amino acids and derivatives	Amino acids and derivatives	C12H21N3O6S2	3	-	1.39658e+06	1.75967e+06	1.69652e+06	5.82404e+06	5.09996e+06	4.79939e+06	1.23035	0.00319983	0.0145478	0.308634	-1.69603	down
mws0629	L-Aspartyl-L-Phenylalanine		Amino acids and derivatives	Amino acids and derivatives	C13H16N2O5	3	13433-09-5	248771	204543	274312	702302	577047	864869	1.20171	0.0243661	0.0585465	0.339343	-1.55918	down
MWSHY0124	Pinocembrin		Flavonoids	Flavanones	C15H12O4	2	480-39-7	279781	276318	286391	829676	918891	965143	1.24128	0.0038761	0.0164952	0.310457	-1.68753	down
Smdp007779	8-Demethylfarrerol		Flavonoids	Flavanones	C16H14O5	2	-	825594	624197	740538	2.58286e+06	2.60271e+06	2.58418e+06	1.2349	0.000869916	0.00709642	0.281904	-1.82672	down
Lahp004593	Rhamnazin 3-O-β-D-glucopyranoside(Flavoyadorinin A)*		Flavonoids	Flavonols	C23H24O12	3	20486-38-8	1.42135e+06	2.3214e+06	1.87213e+06	7.66134e+06	8.44274e+06	5.4486e+06	1.19657	0.0205396	0.0522109	0.260519	-1.94054	down
Hmgp002238	Jaceoside*		Flavonoids	Flavones	C23H24O12	3	25474-11-7	1.42135e+06	2.3214e+06	1.87213e+06	7.66134e+06	8.44274e+06	5.4486e+06	1.19657	0.0205396	0.0522109	0.260519	-1.94054	down
MWS20147	Luteolin-3'-O-glucoside		Flavonoids	Flavones	C21H20O11	2	5154-41-6	2.92417e+07	3.68478e+07	2.58429e+07	1.0642e+07	1.29104e+07	1.04767e+07	1.20745	0.0222232	0.0550168	2.70157	1.4338	up
Wasdp05532	5-hydroxy-4a-methyl-4,4a,5,6,7,8-hexahydronaphthalen-2(3h)-one		Terpenoids	Monoterpenoids	C11H16O2	3	4242-00-6	539403	386132	441735	940365	951333	1.16143e+06	1.19425	0.00491567	0.0194374	0.447826	-1.15899	down
Hajp009554	2',4'-Dihydroxy-4-methoxychalcone		Flavonoids	Chalcones	C16H14O4	2	19309-14-9	2.01167e+06	1.59187e+06	2.56731e+06	8.51791e+06	8.45177e+06	8.32851e+06	1.22228	0.00139901	0.00865867	0.243924	-2.03549	down
Lcyp000673	Prudomestin		Flavonoids	Flavonols	C17H14O7	3	3443-28-5	245257	201340	263286	1.26333e+06	1.21149e+06	1.22013e+06	1.23902	2.62123e-06	0.000397572	0.192122	-2.3799	down
Wagp010987	Gossypetin 3,7,8,3',4'-pentamethyl ether*		Flavonoids	Flavonols	C20H20O8	2	-	58650.9	34691.1	44383.7	80330.9	73297.6	131250	1.03887	0.10103	0.165782	0.483454	-1.04855	down
zjbp110806	6-hydroxy-7-methoxy-2-[2-(4'-hydroxyphenyl)ethyl]chromone*		Others	Chromone	C18H16O5	3	-	2.13552e+06	1.58697e+06	3.30396e+06	6.81879e+06	9.5239e+06	8.4805e+06	1.17081	0.00535077	0.0207543	0.28306	-1.82082	down
HJAP056	Dihydroxy-dimethoxyflavone-7-O-glucoside*		Flavonoids	Flavonols	C23H24O11	1	-	3.41656e+06	4.40957e+06	4.59356e+06	9.60008e+06	9.95635e+06	1.0174e+07	1.21767	0.00104338	0.00773514	0.417744	-1.25931	down
Zmmp003957	Phe-Glu-Leu		Amino acids and derivatives	Amino acids and derivatives	C20H29N3O6	3	-	158791	146976	75136	365098	389078	478461	1.15138	0.00356276	0.0154622	0.309015	-1.69425	down
MW0150927	His-Glu-Thr		Amino acids and derivatives	Amino acids and derivatives	C15H23N5O7	3	-	1.00703e+07	1.11524e+07	1.05324e+07	2.96747e+07	3.42117e+07	2.87584e+07	1.23714	0.00550193	0.021139	0.342762	-1.54472	down
Wcgp010223	3-(Cyclohexen-1-yl)-2-hydroxy-4a,5-dimethyl-2,3,4,5,6,7,8,8a-octahydronaphthalen-1-one		Others	Others	C18H28O2	3	-	975646	1.20831e+06	1.02331e+06	5.33895e+06	5.00642e+06	5.17985e+06	1.24069	9.37757e-06	0.000635665	0.206584	-2.2752	down
Lmmp002795	Pratensein-7-O-glucoside		Flavonoids	Isoflavones	C22H22O11	3	36191-03-4	244925	238630	263125	1.15368e+06	1.2649e+06	1.40211e+06	1.24131	0.00453559	0.0183682	0.195431	-2.35527	down
Lskp211385	dihydrosesamin*		Lignans and Coumarins	Lignans	C20H20O6	3	-	315900	459779	481206	1.61881e+06	1.2407e+06	1.33775e+06	1.20657	0.00544693	0.0209843	0.299453	-1.7396	down
Sayp006468	Acutissimalignan B*		Lignans and Coumarins	Lignans	C20H20O6	3	-	315900	459779	481206	1.61881e+06	1.2407e+06	1.33775e+06	1.20657	0.00544693	0.0209843	0.299453	-1.7396	down
Lmyp005841	Chrysin-7-O-glucoside*		Flavonoids	Flavones	C21H20O9	1	31025-53-3	7.8183e+06	1.11884e+07	1.36032e+07	1.20567e+06	2.06492e+06	1.15655e+06	1.20892	0.0273965	0.0632587	7.36592	2.88087	up
pmp001235	Cnidilide		Others	Lactones	C12H18O2	2	-	419010	253886	278464	681898	728349	639491	1.15552	0.00834309	0.027866	0.464138	-1.10738	down
Lcfp007308	5,7-Dihydroxy-3,3',4',5'-tetramethoxyflavone*		Flavonoids	Flavones	C19H18O8	1	14585-04-7	40176	24157.5	41989.3	126736	103202	134305	1.18885	0.00306103	0.0142189	0.291901	-1.77645	down
mws1175	Pinostrobin		Flavonoids	Flavanones	C16H14O4	2	480-37-5	1.89546e+06	2.48527e+06	2.58918e+06	470285	424995	433228	1.23553	0.012667	0.0370637	5.24642	2.39133	up
Lmzp004885	Tricin		Flavonoids	Flavones	C17H14O7	3	520-32-1	198169	235055	212534	1.23946e+06	1.29667e+06	1.17589e+06	1.24254	0.000475112	0.00521595	0.173964	-2.52314	down
MWSHY0054	Eupatorin; 3',5-Dihydroxy-4',6,7-Trimethoxyflavone*		Flavonoids	Flavones	C18H16O7	1	855-96-9	1.57165e+06	1.24346e+06	1.34508e+06	5.48036e+06	5.27508e+06	5.55926e+06	1.23846	7.20675e-06	0.000565172	0.254996	-1.97145	down
Wagp008723	Mikanin*		Flavonoids	Flavonols	C18H16O7	1	4324-53-2	1.44644e+06	1.4362e+06	1.41423e+06	5.18737e+06	5.1138e+06	5.56445e+06	1.24404	0.00125036	0.00845549	0.270828	-1.88455	down
Sayp009177	vouacapenic acid		Terpenoids	Ditepenoids	C20H28O3	3	-	1.70067e+06	1.26752e+06	1.32286e+06	590663	728923	738678	1.18614	0.0220828	0.0547989	2.08479	1.0599	up
MWStz497	Matairesinol*		Lignans and Coumarins	Lignans	C20H22O6	1	580-72-3	3.8513e+07	3.072e+07	5.92268e+07	1.29495e+08	1.87889e+08	1.76004e+08	1.18319	0.00981421	0.0309438	0.260363	-1.9414	down
MWStz070	N-(2-Hydroxy-4-methoxyphenyl)acetamide		Alkaloids	Alkaloids	C9H11NO3	1	58469-06-0	7.53185e+06	7.39424e+06	7.79333e+06	1.63591e+07	1.5754e+07	1.58329e+07	1.24338	1.70043e-05	0.000896507	0.473854	-1.07748	down
Lmhp008801	LysoPE 18:3		Lipids	LPE	C23H42NO7P	2	-	699594	992578	713425	284364	414375	283313	1.16454	0.0234372	0.0567557	2.44956	1.29252	up
Zbsp002100	Catechin-(4α→8)-gallocatechin		Flavonoids	Flavanols	C30H26O13	1	-	588074	576556	926444	1.44728e+06	1.7298e+06	1.306e+06	1.13563	0.00941006	0.0301016	0.466437	-1.10025	down
Lmyp006086	Prunetin-5-O-glucoside*		Flavonoids	Isoflavones	C22H22O10	3	-	222861	303282	219484	685324	884125	718676	1.2129	0.00616453	0.0231446	0.325868	-1.61764	down
Lmqp010784	Progesterone		Terpenoids	Ditepenoids	C21H30O2	2	57-83-0	2.04047e+06	2.19287e+06	2.25226e+06	7.60732e+06	8.07606e+06	5.85602e+06	1.22695	0.0169667	0.0460827	0.301104	-1.73167	down
Hmhp005160	Rehderianin I*		Flavonoids	Flavones	C17H14O7	1	90965-30-3	15430.9	38754.1	18083.1	125228	84514.6	119095	1.16006	0.00826231	0.027866	0.219768	-2.18594	down
mws0250	L-Tyrosine*		Amino acids and derivatives	Amino acids and derivatives	C9H11NO3	1	60-18-4	1.33776e+07	1.41707e+07	1.3911e+07	3.83862e+07	3.73638e+07	3.72228e+07	1.24419	4.00893e-06	0.000475664	0.366985	-1.44621	down
Wagp009375	3,5,6,7-Tetramethoxyflavone*		Flavonoids	Flavonols	C19H18O6	2	75413-07-9	219868	160394	194082	599142	587917	554374	1.22743	8.7595e-05	0.00211342	0.329811	-1.60029	down
MWSHC2050	4',5,6,7-Tetramethoxyflavone*		Flavonoids	Flavones	C19H18O6	2	1168-42-9	219868	160394	194082	599142	587917	554374	1.22743	8.7595e-05	0.00211342	0.329811	-1.60029	down
Sazp010264	Monogalactosyldiacylglycerol		Lipids	Glycerol ester	C45H70O10	1	-	96371.2	76943.8	63184.4	139651	151896	244319	1.09978	0.0843178	0.144234	0.441341	-1.18003	down
MWSslk002	Sophoricoside		Flavonoids	Isoflavones	C21H20O10	3	152-95-4	1.7231e+06	1.45041e+06	1.83492e+06	711178	519614	498244	1.20889	0.0027645	0.0132164	2.89666	1.53439	up
Lmgp004731	Genistein-7-O-galactoside		Flavonoids	Isoflavones	C21H20O10	3	-	1.42855e+06	1.6354e+06	1.47373e+06	594169	569310	500427	1.23443	0.00120734	0.00834136	2.72713	1.44738	up
MWSHY0189	Apigenin 7-O-beta-D-glucoside*		Flavonoids	Flavones	C21H20O10	1	578-74-5	1.42855e+06	1.6354e+06	1.47373e+06	594169	569310	500427	1.23443	0.00120734	0.00834136	2.72713	1.44738	up
MWS20148	Apigenin-4'-O-glucoside*		Flavonoids	Flavones	C21H20O10	1	-	1.42855e+06	1.6354e+06	1.47373e+06	594169	569310	500427	1.23443	0.00120734	0.00834136	2.72713	1.44738	up
Wahlp08069	LysoPC 17:2(2n isomer)*		Lipids	LPC	C25H48NO7P	3	-	51691.6	77130	73159	159647	174100	118439	1.14645	0.0224985	0.0552658	0.446675	-1.1627	down
Lssp210111	2α-Acetoxy-14β-[(S)-2-methyl-butyryloxy]-4(20),11-taxadiene		Others	Others	C27H42O6	2	-	329598	330281	272329	1.40492e+06	1.63514e+06	1.04012e+06	1.22064	0.0250063	0.0593274	0.228472	-2.12991	down
pmb0818	5-Methoxyindoleacetate		Alkaloids	Plumerane	C11H11NO3	3	3471-31-6	8.15311e+06	7.96517e+06	8.52626e+06	3.51729e+06	3.48127e+06	3.31915e+06	1.24279	0.000340389	0.00444535	2.38857	1.25615	up
Hmsp000364	L-Cyclopentylglycine		Amino acids and derivatives	Amino acids and derivatives	C7H13NO2	3	2521-84-8	3.46604e+06	3.2953e+06	2.94928e+06	1.52801e+06	1.48031e+06	1.4765e+06	1.23513	0.00699808	0.0248733	2.16522	1.11451	up
Lmmp004019	Ent-14β,16-epoxy-8-pimarene-3α,15–diol		Terpenoids	Ditepenoids	C20H32O3	3	1188281-98-2	164297	227636	168220	449947	497486	354349	1.17763	0.0144463	0.0412109	0.430297	-1.2166	down
pmp000791	Moracin Y		Phenolic acids	Phenolic acids	C15H10O5	3	1252581-54-6	1.32097e+06	1.55617e+06	1.52489e+06	9.71619e+06	1.08249e+07	1.04339e+07	1.24276	0.000825951	0.00690213	0.142115	-2.81487	down
MWS20151	Apigenin*		Flavonoids	Flavones	C15H10O5	3	520-36-5	1.32097e+06	1.55617e+06	1.52489e+06	9.71619e+06	1.08249e+07	1.04339e+07	1.24276	0.000825951	0.00690213	0.142115	-2.81487	down
MWS20190	5,7,4'-trihydroxy-6,3',5'-trimethoxyisoflavone*		Flavonoids	Isoflavones	C18H16O8	3	-	98683.7	155966	131789	446569	412704	524691	1.21232	0.00315421	0.0144606	0.279226	-1.84049	down
Zmdp000917	δ-Guanidinovaleric acid		Organic acids	Organic acids	C6H13N3O2	2	462-93-1	600956	654659	802927	293358	388175	317339	1.18192	0.0150257	0.0425974	2.06087	1.04325	up
Safp022031	Gorlic acid*		Lipids	Free fatty acids	C18H30O2	2	-	1.8711e+06	1.91184e+06	1.90225e+06	4.6887e+06	4.61758e+06	4.80484e+06	1.24458	0.000206021	0.00347066	0.402887	-1.31155	down
Wcdp009119	Octadeca-9,12,15-trienoic acid*		Lipids	Free fatty acids	C18H30O2	2	28290-79-1	1.8711e+06	1.91184e+06	1.90225e+06	4.6887e+06	4.61758e+06	4.80484e+06	1.24458	0.000206021	0.00347066	0.402887	-1.31155	down
pme1210	L-Methionine		Amino acids and derivatives	Amino acids and derivatives	C5H11NO2S	3	63-68-3	426401	530501	531185	1.54202e+06	1.42144e+06	1.53385e+06	1.23317	4.73632e-05	0.00160528	0.330883	-1.59561	down
pmb0889	Punicic acid		Lipids	Free fatty acids	C18H30O2	3	544-72-9	1.34679e+06	1.32597e+06	1.65942e+06	4.00476e+06	3.89885e+06	3.57231e+06	1.22862	0.0001821	0.00326708	0.377502	-1.40545	down
zjbp110805	6-hydroxy-2-[2-(3-methoxy-4-hydroxyphenyl)ethyl]chromone*		Others	Chromone	C18H16O5	3	-	1.93771e+06	1.59072e+06	3.43715e+06	9.09014e+06	7.98178e+06	8.31313e+06	1.17572	0.00194616	0.0103565	0.274397	-1.86566	down
Lahp005751	6-Demethoxy-4'-O-methylcapillarisin*		Flavonoids	Other Flavonoids	C16H12O6	3	61854-35-1	1.80828e+06	1.89459e+06	1.95396e+06	1.22579e+07	1.37383e+07	1.37113e+07	1.24385	0.00173121	0.00970229	0.142462	-2.81135	down
MWSHC20110	8-Methoxyapigenin*		Flavonoids	Flavones	C16H12O6	3	57096-02-3	1.80828e+06	1.89459e+06	1.95396e+06	1.22579e+07	1.37383e+07	1.37113e+07	1.24385	0.00173121	0.00970229	0.142462	-2.81135	down
Lmqp006281	Kaempferol-3-O-(4''-O-acetyl)rhamnoside		Flavonoids	Flavonols	C23H22O11	3	-	107821	119727	119983	246818	208423	246210	1.22348	0.00693437	0.0247086	0.495445	-1.0132	down
MWS04559g	3-Hydroxy-L-phenylalanine*		Amino acids and derivatives	Amino acids and derivatives	C9H11NO3	1	587-33-7	1.28529e+07	1.40468e+07	1.36187e+07	3.74264e+07	3.79884e+07	3.76285e+07	1.24351	1.48497e-05	0.000851992	0.358433	-1.48023	down
Lmcp002302	N6-(2-Hydroxyethyl)adenosine*		Nucleotides and derivatives	Nucleotides and derivatives	C12H17N5O5	2	4338-48-1	182994	145676	129428	535791	568214	388002	1.20351	0.0186151	0.0492081	0.307035	-1.70353	down
pme3011	4-Aminobutanoate		Organic acids	Organic acids	C4H9NO2	2	56-12-2	1.16003e+06	1.17871e+06	1.18769e+06	4.33677e+06	4.3493e+06	4.18237e+06	1.2448	0.000222536	0.00364863	0.274037	-1.86756	down
MWSmce270	Rosmanol		Terpenoids	Ditepenoids	C20H26O5	3	80225-53-2	1.2152e+06	1.38726e+06	1.18899e+06	465444	334888	294821	1.21351	0.000444952	0.0050269	3.46203	1.79162	up
Lajp006633	5,8-dihydroxy-6,7,3',4'-tetramethoxyflavone-8-O-β-D-glucoside*		Flavonoids	Flavones	C25H28O13	1	-	617717	720918	823830	2.33036e+06	2.18975e+06	2.15597e+06	1.23084	5.11467e-05	0.00167373	0.323912	-1.62632	down
Wagp007602	Demethoxysudachitin*		Flavonoids	Flavones	C17H14O7	1	4323-80-2	23457.3	25462	28098.9	116724	134159	125099	1.24083	0.00143458	0.00878336	0.204845	-2.28739	down
MWSmce356	L-Canavanine sulfate		Amino acids and derivatives	Amino acids and derivatives	C5H14N4O7S	3	2219-31-0	1.8829e+06	1.77137e+06	1.84443e+06	955254	858850	858887	1.2377	3.32365e-05	0.00139153	2.05713	1.04063	up
mws0847	1-Methyladenine		Nucleotides and derivatives	Nucleotides and derivatives	C6H7N5	3	5142-22-3	74667.5	49848.9	96151.8	205744	256404	198691	1.16804	0.00385509	0.0164549	0.333921	-1.58242	down
Lajp004824	Medicarpinglucoside		Flavonoids	Isoflavones	C22H24O9	3	-	1.99914e+06	1.67097e+06	2.54589e+06	718526	627906	674213	1.21349	0.030605	0.0689159	3.07625	1.62117	up
Lmlp005572	Galangin 7-glucoside		Flavonoids	Flavonols	C21H20O10	1	-	1.99914e+06	1.67097e+06	2.54589e+06	718526	627906	674213	1.21349	0.030605	0.0689159	3.07625	1.62117	up
Zmhp004269	Scullcapflavone II		Flavonoids	Flavones	C19H18O8	1	55084-08-7	133477	91355	89906.5	410132	289483	339331	1.20113	0.0112073	0.0338719	0.30294	-1.72289	down
pmp001013	1,2,3,6,7-Pentamethoxyxanthone		Flavonoids	Other Flavonoids	C18H18O7	2	-	555000	479839	432102	2.13329e+06	2.07292e+06	2.08171e+06	1.23891	3.22834e-05	0.00137369	0.233295	-2.09977	down
HJKP000649	N-benzylformamide*		Alkaloids	Alkaloids	C8H9NO	1	6343-54-0	5.8755e+06	6.2126e+06	5.71526e+06	1.53074e+07	1.53723e+07	1.6251e+07	1.24259	0.000124089	0.00260364	0.379354	-1.39838	down
pme1383	Pyridoxine		Others	Vitamin	C8H11NO3	3	65-23-6	1.96261e+06	1.96381e+06	1.82208e+06	4.31904e+06	4.75477e+06	4.98796e+06	1.23769	0.00336268	0.0149821	0.408803	-1.29052	down
Lmgp000659	2-Phenylacetamide*		Alkaloids	Alkaloids	C8H9NO	1	103-81-1	5.8755e+06	6.2126e+06	5.71526e+06	1.53074e+07	1.53723e+07	1.6251e+07	1.24259	0.000124089	0.00260364	0.379354	-1.39838	down
pme1109	Guanine		Nucleotides and derivatives	Nucleotides and derivatives	C5H5N5O	1	73-40-5	1.01435e+06	760491	798309	1.97194e+06	1.4573e+06	1.91327e+06	1.17158	0.0158512	0.0441232	0.481638	-1.05398	down
Hmjp000461	3-O-Glucoside-3-hydroxy-y-butyrolactone		Others	Lactones	C10H16O8	2	-	188851	215233	168072	491924	422494	537105	1.21743	0.00601301	0.0226742	0.394176	-1.34309	down
pme3967	2-(Dimethylamino)guanosine*		Nucleotides and derivatives	Nucleotides and derivatives	C12H17N5O5	2	2140-67-2	240524	146708	139373	467913	462901	378265	1.15619	0.0041059	0.0171652	0.402272	-1.31376	down
MWSslk210	Irigenin*		Flavonoids	Isoflavones	C18H16O8	3	548-76-5	139537	153275	119421	487220	518449	445770	1.23411	0.000887748	0.00710226	0.284016	-1.81595	down
pmp000013	Eupatilin-7-O-glucoside		Flavonoids	Flavones	C24H26O12	1	-	514526	623116	660770	4.65217e+06	4.39095e+06	3.39191e+06	1.23514	0.0107572	0.0328955	0.144625	-2.78961	down
MW0155809	Pro-Asp-Glu		Amino acids and derivatives	Amino acids and derivatives	C14H21N3O8	3	-	1.31087e+06	1.27161e+06	1.37364e+06	2.86115e+06	2.7933e+06	3.23828e+06	1.23523	0.00527259	0.0205648	0.444871	-1.16854	down
mws0224	Methionine		Amino acids and derivatives	Amino acids and derivatives	C5H11NO2S	3	59-51-8	661482	658544	683944	1.99604e+06	1.83031e+06	2.02931e+06	1.24255	0.00198226	0.0104123	0.342228	-1.54697	down
Wbmp002283	Α-hydroxyquinoline		Alkaloids	Alkaloids	C9H7NO	1	-	5.98869e+07	6.51703e+07	5.78465e+07	2.40879e+07	2.6659e+07	2.57759e+07	1.23802	0.00162959	0.00933993	2.39019	1.25712	up
Wcfp001236	Quinoline		Others	Others	C9H7N	2	91-22-5	8.11884e+06	8.34862e+06	7.96038e+06	3.2253e+06	3.30503e+06	3.13667e+06	1.24385	7.51916e-05	0.00198509	2.52693	1.33739	up
pme2244	3-Indolepropionic acid		Alkaloids	Plumerane	C11H11NO2	3	830-96-6	1.85979e+06	1.95125e+06	1.78223e+06	822227	814360	872984	1.24057	0.000736916	0.00655819	2.22878	1.15625	up
Cmpp007319	7-Methoxy-5-Prenyloxycoumarin		Lignans and Coumarins	Coumarins	C15H16O4	3	35590-41-1	347372	329276	296108	641053	687472	625711	1.23017	0.000213734	0.00355285	0.497768	-1.00645	down
pme2960	Naringenin chalcone		Flavonoids	Chalcones	C15H12O5	1	73692-50-9	3.41345e+06	3.41551e+06	3.5212e+06	7.83413e+06	7.54673e+06	9.09559e+06	1.23385	0.00974051	0.0308125	0.422862	-1.24174	down
pmb0764	5-(2-Hydroxyethyl)-4-methylthiazole		Others	Others	C6H9NOS	3	137-00-8	1.29363e+06	1.40346e+06	1.33131e+06	3.41527e+06	2.2961e+06	2.71345e+06	1.18441	0.0450211	0.0918817	0.478159	-1.06444	down
pmf0291	4-Hydroxypyridine		Alkaloids	Pyridine alkaloids	C5H5NO	3	626-64-2	434150	394144	302133	229744	174545	155789	1.13562	0.0216684	0.0540192	2.01834	1.01317	up
mws0049	Gallocatechin		Flavonoids	Flavanols	C15H14O7	2	970-73-0	1.71917e+06	1.70724e+06	1.57183e+06	3.31542e+06	3.95015e+06	3.71781e+06	1.23142	0.00589442	0.0223157	0.455073	-1.13583	down
Zmbp000449	Epigoitrin		Others	Others	C5H7NOS	2	1072-93-1	3.89133e+06	4.26776e+06	4.12563e+06	9.54309e+06	9.52665e+06	8.89599e+06	1.24056	0.000214644	0.00355285	0.439277	-1.1868	down
Hmgp003130	Iristectorigenin A		Flavonoids	Isoflavones	C17H14O7	3	39012-01-6	28122.1	20019.7	10701.3	123516	117332	116669	1.19209	0.000636889	0.00612575	0.164589	-2.60306	down
pmp000004	4',5,7-Trihydroxy-3',6-dimethoxyflavone (Jaceosidin)*		Flavonoids	Flavones	C17H14O7	1	18085-97-7	28122.1	20019.7	10701.3	123516	117332	116669	1.19209	0.000636889	0.00612575	0.164589	-2.60306	down
mws1715	Cordycepin*		Nucleotides and derivatives	Nucleotides and derivatives	C10H13N5O3	3	73-03-0	4.50002e+06	4.86893e+06	4.6481e+06	722159	761494	647369	1.2431	0.00026639	0.00398412	6.57761	2.71756	up
Layp003558	3,4,5-Trimethoxyphenol-1-O-β-D-glucoside		Others	Others	C15H22O9	3	-	394630	512683	335778	1.0689e+06	1.01638e+06	1.28423e+06	1.19845	0.00347784	0.0152551	0.368924	-1.43861	down
Wbtp003818	1-hydroxy-7-{[(2s,3r,4s,5r,6r)-3,4,5-trihydroxy-6-(hydroxymethyl)oxan-2-yl]oxy}xanthen-9-one		Flavonoids	Other Flavonoids	C19H18O9	2	-	1.02249e+06	706296	1.14803e+06	5.13571e+06	2.49966e+06	4.61067e+06	1.16494	0.057102	0.109548	0.234918	-2.08977	down
MWStz040	Pterolactam*		Alkaloids	Pyrrole alkaloids	C5H9NO2	1	38072-88-7	2.73102e+06	2.93568e+06	2.49385e+06	5.67557e+06	5.58953e+06	5.64319e+06	1.2349	0.00136322	0.00865867	0.482637	-1.05099	down
MWS00330g	1-Amino-1-cyclobutane-carboxylic-acid*		Amino acids and derivatives	Amino acids and derivatives	C5H9NO2	1	22264-50-2	2.73102e+06	2.93568e+06	2.49385e+06	5.67557e+06	5.58953e+06	5.64319e+06	1.2349	0.00136322	0.00865867	0.482637	-1.05099	down
Yacp000453	3-hydroxy-1-methylpyrrolidin-2-one*		Alkaloids	Pyrrole alkaloids	C5H9NO2	1	132996-63-5	2.73102e+06	2.93568e+06	2.49385e+06	5.67557e+06	5.58953e+06	5.64319e+06	1.2349	0.00136322	0.00865867	0.482637	-1.05099	down
pme0006	L-Proline*		Amino acids and derivatives	Amino acids and derivatives	C5H9NO2	1	147-85-3	2.73102e+06	2.93568e+06	2.49385e+06	5.67557e+06	5.58953e+06	5.64319e+06	1.2349	0.00136322	0.00865867	0.482637	-1.05099	down
pme2292	Putrescine		Alkaloids	Alkaloids	C4H12N2	3	110-60-1	697445	757360	725146	2.17674e+06	1.71541e+06	2.22846e+06	1.22762	0.0142718	0.0407949	0.356166	-1.48938	down
Wbjp002990	7,15,16,17-tetramethoxy-3,5-dioxa-11-azapentacyclo[10.7.1.02,6.08,20.014,19]icosa-1,6,8(20),14,16,18-hexaene		Alkaloids	Alkaloids	C21H23NO6	3	-	9.81136e+06	1.15004e+07	7.04115e+06	2.75199e+07	3.11481e+07	3.18934e+07	1.20614	0.00038291	0.00469891	0.313079	-1.6754	down
MWSmce116	5'-Deoxyadenosine*		Nucleotides and derivatives	Nucleotides and derivatives	C10H13N5O3	3	4754-39-6	6.7161e+06	6.53273e+06	6.91248e+06	1.06681e+06	1.09956e+06	1.01749e+06	1.24455	0.000213158	0.00355285	6.33234	2.66274	up
Lamp000484	4-Methylazetidine-2-Carboxylic acid*		Alkaloids	Alkaloids	C5H9NO2	1	1779725-63-1	2.87768e+06	2.91974e+06	2.72344e+06	7.44173e+06	5.37687e+06	5.68397e+06	1.20268	0.034437	0.0748413	0.460523	-1.11865	down
MWSprf134	Plantagoside		Flavonoids	Flavanones	C21H22O12	3	78708-33-5	6.50683e+06	5.56077e+06	7.72541e+06	1.49985e+07	9.79442e+06	1.60913e+07	1.10833	0.0571653	0.109596	0.484124	-1.04655	down
Hmpp003270	Luteolin-4'-O-glucoside*		Flavonoids	Flavones	C21H20O11	2	6920-38-3	3.42193e+07	1.93679e+07	3.09493e+07	1.18801e+07	9.4029e+06	1.13234e+07	1.1534	0.0579559	0.110738	2.59264	1.37442	up
Lmsp004915	Aureusidin-4-O-glucoside*		Flavonoids	Aurones	C21H20O11	2	-	3.42193e+07	1.93679e+07	3.09493e+07	1.18801e+07	9.4029e+06	1.13234e+07	1.1534	0.0579559	0.110738	2.59264	1.37442	up
MWSHY0136	Kaempferol 3-O-glucoside*		Flavonoids	Flavonols	C21H20O11	2	480-10-4	3.42193e+07	1.93679e+07	3.09493e+07	1.18801e+07	9.4029e+06	1.13234e+07	1.1534	0.0579559	0.110738	2.59264	1.37442	up
MWStz500	Iristectorin A*		Flavonoids	Isoflavones	C23H24O12	3	37744-61-9	55982.9	65134.6	19458.2	166816	141974	223921	1.08664	0.0161183	0.0446389	0.263887	-1.92201	down
pmb0736	Tricin-7-O-Glucoside*		Flavonoids	Flavones	C23H24O12	3	32769-01-0	55982.9	65134.6	19458.2	166816	141974	223921	1.08664	0.0161183	0.0446389	0.263887	-1.92201	down
pmp001012	6-Hydroxy-1,2,3,7-tetramethoxyxanthone		Flavonoids	Other Flavonoids	C17H16O7	2	64756-87-2	191358	198022	230199	904548	780427	1.04062e+06	1.23365	0.00983713	0.0309804	0.227319	-2.13721	down
pme3961	Deoxyadenosine*		Nucleotides and derivatives	Nucleotides and derivatives	C10H13N5O3	3	958-09-8	8.79486e+06	8.88997e+06	7.82843e+06	1.32822e+06	1.36098e+06	1.12544e+06	1.24148	0.00147134	0.00885603	6.68825	2.74163	up
Cmpp007452	Auraptenol		Lignans and Coumarins	Coumarins	C15H16O4	3	1221-43-8	297551	264450	337124	684850	598206	533209	1.19669	0.00929688	0.0298737	0.49504	-1.01438	down
Lcsp003242	Dihydrozeatin ribonucleoside		Alkaloids	Alkaloids	C15H23N5O5	3	22663-55-4	120474	117053	96073.5	234417	288420	196299	1.17646	0.0326065	0.0721295	0.46389	-1.10815	down
Lmmp001947	Gossypetin-3-O-glucoside*		Flavonoids	Flavonols	C21H20O13	1	-	521596	385052	707422	1.75223e+06	1.48608e+06	2.3691e+06	1.17342	0.0258102	0.0605506	0.287846	-1.79663	down
Lmdp002969	Myricetin-3-O-galactoside*		Flavonoids	Flavonols	C21H20O13	1	15648-86-9	521596	385052	707422	1.75223e+06	1.48608e+06	2.3691e+06	1.17342	0.0258102	0.0605506	0.287846	-1.79663	down
Sagp004552	Maesopsin		Flavonoids	Aurones	C15H12O6	3	5989-16-2	1.44051e+07	1.36381e+07	1.68281e+07	5.74413e+06	7.66741e+06	6.63214e+06	1.20563	0.0039816	0.0168184	2.23867	1.16264	up
Lhsp101905	Actinidialactone		Terpenoids	Monoterpenoids	C10H14O2	3	76729-80-1	5.0588e+06	6.235e+06	4.9047e+06	1.18754e+07	1.1086e+07	1.1565e+07	1.22006	0.000885473	0.00710226	0.469162	-1.09184	down
MWSHY0017	Naringenin		Flavonoids	Flavanones	C15H12O5	2	480-41-1	3.31039e+06	3.42348e+06	3.59479e+06	7.86474e+06	7.69965e+06	8.52916e+06	1.23974	0.00136887	0.00865867	0.42869	-1.22199	down
pmp000573	Acacetin-7-O-galactoside*		Flavonoids	Flavones	C22H22O10	3	-	184412	158328	212248	734503	771333	729973	1.2356	1.3351e-05	0.000791881	0.248227	-2.01027	down
Hmcp002354	Crenatine		Alkaloids	Plumerane	C14H14N2O	3	26585-14-8	138459	198374	199991	674606	552242	635917	1.21732	0.00142132	0.0087209	0.288186	-1.79493	down
Lmdp007998	Xanthomicrol*		Flavonoids	Flavones	C18H16O7	2	16545-23-6	11884.6	35737.2	22742.9	57008.9	84021.9	104606	1.08892	0.0333044	0.0732182	0.286459	-1.8036	down
Zmdp001857	γ-Glu-Tyr		Amino acids and derivatives	Amino acids and derivatives	C14H18N2O6	3	7432-23-7	309199	252487	269091	1.10868e+06	1.20285e+06	1.16677e+06	1.24006	4.98824e-05	0.00165134	0.238847	-2.06584	down
Lmhp009497	LysoPE 20:4*		Lipids	LPE	C25H44NO7P	2	-	345071	128011	262600	23803.5	45842	56428.1	1.13533	0.0815751	0.140397	5.83534	2.54482	up
zjbp110804	6,7-dimethoxy-2-[2-(4'-hydroxy-3'-methoxyphenyl)ethyl]chromone		Others	Chromone	C20H20O6	3	-	521960	459594	633057	1.30564e+06	1.27695e+06	1.63785e+06	1.20649	0.00839544	0.0279227	0.382569	-1.38621	down
Lmtp007747	Santalic acid*		Terpenoids	Sesquiterpenoids	C15H22O2	3	73590-17-7	151640	178344	212194	735524	560593	621573	1.22141	0.00704524	0.0249786	0.282724	-1.82253	down
Wagp009074	Santin*		Flavonoids	Flavonols	C18H16O7	2	27782-63-4	18518.4	17482.7	11863	96129.3	89618.5	72428.4	1.22266	0.00637693	0.0235592	0.185393	-2.43134	down
Wacyp04721	Rhodioloside F		Terpenoids	Monoterpenoids	C21H36O11	3	-	148971	126995	152187	1.55169e+06	378998	600568	1.10335	0.190578	0.270611	0.169146	-2.56366	down
MWSHY0098	(-)-Epigallocatechin		Flavonoids	Flavanols	C15H14O7	2	970-74-1	1.87475e+06	1.8051e+06	2.15759e+06	5.33248e+06	6.35019e+06	6.87302e+06	1.22931	0.00833362	0.027866	0.31459	-1.66846	down
Wadp008130	7-Oxo-3-hydroxypimaric acid		Terpenoids	Ditepenoids	C20H28O4	3	-	754768	1.65681e+06	737080	2.69383e+06	2.59275e+06	3.75947e+06	1.10451	0.0163094	0.0450806	0.34807	-1.52255	down
Lmmp005689	Cajanin*		Flavonoids	Isoflavones	C16H12O6	3	32884-36-9	176960	109928	141217	1.05177e+06	1.06603e+06	1.19221e+06	1.23314	0.000504258	0.00537686	0.129336	-2.9508	down
pma0461	14,15-Dehydrocrepenynic acid		Lipids	Free fatty acids	C18H28O2	3	4154-44-3	1.07476e+06	974610	1.02965e+06	5.69077e+06	5.08097e+06	5.77356e+06	1.24292	0.00203366	0.0105654	0.186096	-2.42588	down
MWSmce539	Dibutyl sebacate		Lipids	Free fatty acids	C18H34O4	3	109-43-3	106379	87873.7	132472	294802	281732	243250	1.19758	0.00140637	0.00866654	0.398549	-1.32717	down
pme0295	4-Acetamidobutanoate		Organic acids	Organic acids	C6H11NO3	3	3025-96-5	311444	88862.4	125372	1.08466e+06	1.02302e+06	1.30869e+06	1.16396	0.00120344	0.00834136	0.153871	-2.70021	down
Sasp001236	7-Hydroxy-tryptophan		Amino acids and derivatives	Amino acids and derivatives	C11H12N2O3	1	-	3.98359e+06	3.74006e+06	3.59879e+06	1.71757e+06	1.92498e+06	1.87133e+06	1.23535	0.000511323	0.00541758	2.05344	1.03805	up
Hajp008429	4',5-dihydroxy-7-methoxy-6-methylfavanone*		Flavonoids	Flavones	C17H16O5	2	-	786045	316249	417994	2.28047e+06	2.43943e+06	2.37603e+06	1.18059	0.00304078	0.0141688	0.214248	-2.22265	down
Wahlp07175	5,7-Dimethoxy-4'-hydroxyflavanone		Flavonoids	Flavones	C17H16O5	2	26207-67-0	631729	378491	632891	2.40037e+06	2.39112e+06	2.31203e+06	1.21315	0.000879833	0.00710226	0.231309	-2.1121	down
pmb0819	3-Indoleacetonitrile		Alkaloids	Plumerane	C10H8N2	3	771-51-7	2.13545e+06	2.24337e+06	2.2077e+06	1.01666e+06	1.09443e+06	998099	1.24065	1.21762e-05	0.000787855	2.1184	1.08298	up
Zbsp002083	Pelargonin		Flavonoids	Anthocyanidins	C27H31O15+	3	58751-31-8	253283	718600	241984	935131	1.6499e+06	860408	1.00997	0.0782696	0.136624	0.352312	-1.50508	down
Lcsp002026	Pro-Val-Val		Amino acids and derivatives	Amino acids and derivatives	C15H27N3O4	3	-	97609.5	158436	121673	246855	339011	271579	1.15399	0.0120883	0.0359616	0.440517	-1.18273	down
Lmhp008589	LysoPE 18:3(2n isomer)		Lipids	LPE	C23H42NO7P	1	-	689173	993245	934401	167613	99550.6	179431	1.20972	0.011782	0.0351976	5.8595	2.55078	up
MWSmce140	trans-Trimethoxyresveratrol		Others	Stilbene	C17H18O3	3	22255-22-7	3.33856e+06	2.82954e+06	3.19506e+06	9.05083e+06	8.53255e+06	1.02559e+07	1.23382	0.00400196	0.0168794	0.33633	-1.57205	down
Lcsp001749	Gly-Glu-Leu		Amino acids and derivatives	Amino acids and derivatives	C13H23N3O6	3	-	39342	66538.8	56719.9	143063	115515	129636	1.1656	0.0026008	0.01255	0.418844	-1.25551	down
HJAP006	Syringetin-7-O-glucoside*		Flavonoids	Flavonols	C23H24O13	1	-	355596	509059	338452	883785	978095	1.03204e+06	1.19109	0.00152899	0.00905618	0.415737	-1.26626	down
Zmjp004875	Tomentin		Flavonoids	Flavonols	C17H14O8	3	59171-23-2	351415	168600	358770	1.07756e+06	753365	701916	1.10701	0.0248894	0.0592477	0.346957	-1.52717	down
Zmjp000182	N(omega)-Methyl-L-arginine*		Amino acids and derivatives	Amino acids and derivatives	C7H16N4O2	1	17035-90-4	2.78835e+07	3.155e+07	3.46128e+07	7.20398e+07	5.8589e+07	5.94602e+07	1.20503	0.00859008	0.0283712	0.494748	-1.01523	down
pma0104	N-Sinapoylhydroxycoumarin		Lignans and Coumarins	Coumarins	C20H16O7	3	-	496241	676373	738841	1.75207e+06	1.50285e+06	2.00313e+06	1.19667	0.00656413	0.0238978	0.36353	-1.45985	down
MWStz602	Quercetagetin-7-O-glucoside(Quercetagitrin)*		Flavonoids	Flavonols	C21H20O13	1	548-75-4	573693	980157	692520	1.30843e+06	1.9729e+06	1.4719e+06	1.10353	0.0321556	0.0716892	0.472599	-1.08131	down
Layp005773	Ageconyflavone B-4'-glucoside		Flavonoids	Flavones	C25H28O12	3	-	197103	90150.8	227538	408560	575559	356918	1.05063	0.0319804	0.0714104	0.383876	-1.38129	down
MWSHY0176	Farrerol*		Flavonoids	Flavanones	C17H16O5	2	24211-30-1	373812	373812	373812	2.32915e+06	1.86906e+06	2.30169e+06	1.24096	0.00683623	0.0244233	0.172531	-2.53507	down
Ljmp121501	Mansonone N		Terpenoids	Sesquiterpenoids	C16H22O4	3	-	184078	133285	205983	284246	472722	290741	1.05828	0.0926286	0.154671	0.499515	-1.0014	down
MWSHY0196	Genkwanin (Apigenin 7-methyl ether)*		Flavonoids	Flavones	C16H12O5	1	437-64-9	248775	275963	310506	1.19167e+06	1.35825e+06	1.26161e+06	1.23918	0.000809334	0.00690213	0.219136	-2.1901	down
Zapp009018	2',6'-dimethoxy-4,4'-di-hydroxychalcone*		Flavonoids	Chalcones	C17H16O5	3	123316-64-3	14719.3	14719.3	14719.3	82587.2	73596.4	78790.2	1.2441	0.00167426	0.00953325	0.187927	-2.41176	down
MWStz383	Gardenin D*		Flavonoids	Flavones	C19H18O8	1	29202-00-4	21078.1	73538.3	56708.9	201293	229673	182788	1.11054	0.00181934	0.00990377	0.246557	-2.02001	down
Hmmp007513	5,7-Dihydroxy-6,3',4',5'-tetramethoxyflavone (Arteanoflavone)*		Flavonoids	Flavones	C19H18O8	1	68710-17-8	21078.1	73538.3	56708.9	201293	229673	182788	1.11054	0.00181934	0.00990377	0.246557	-2.02001	down
Lmhp011562	1-α-Linolenoyl-glycerol*		Lipids	Glycerol ester	C21H36O4	3	-	595420	699957	455213	181474	275984	291466	1.13219	0.0258894	0.0606644	2.33747	1.22495	up
Wagp009413	5,7-Dihydroxy-3,4',6,8-tetramethoxyflavone*		Flavonoids	Flavonols	C19H18O8	1	50461-86-4	31966.1	36411.2	45877.9	107037	101402	67487.7	1.15115	0.0378642	0.0809304	0.414078	-1.27203	down
Wcop004647	6a-methyl-10-methylene-5,11-dioxododecahydro-9H-9,11a-methanonaphtho[1',2':1,7]cyclohepta[1,2-b]oxirene-3-carboxylic acid		Terpenoids	Ditepenoids	C19H22O5	3	-	3.68305e+06	6.20319e+06	3.27263e+06	1.61997e+06	2.35433e+06	1.36474e+06	1.08029	0.0928788	0.154998	2.46465	1.30138	up
Zbsp010780	Methyl [6]-Gingerdiol 5-acetate		Phenolic acids	Phenolic acids	C20H32O5	3	-	25145.3	35886.3	51309.5	191066	181390	152024	1.20044	0.00125654	0.00846523	0.214195	-2.22301	down
Zbjp001957	Cyanidin 3,5-O-diglucoside*		Flavonoids	Anthocyanidins	C27H31O16+	2	20905-74-2	635844	737582	530293	1.99318e+06	1.36086e+06	1.24545e+06	1.15715	0.0530655	0.103905	0.413898	-1.27265	down
Zmzp006646	Capillarisin		Others	Chromone	C16H12O7	3	56365-38-9	2.08516e+06	2.2609e+06	2.19547e+06	4.6386e+06	4.65296e+06	4.48965e+06	1.24209	5.05862e-06	0.000475664	0.47467	-1.075	down
Lhhp102904	Horsfieldin*		Lignans and Coumarins	Lignans	C20H20O6	3	-	541245	512906	587432	1.47033e+06	1.4233e+06	1.2573e+06	1.23407	0.0029462	0.0138184	0.395474	-1.33835	down
Wbwp006397	(3r,4r)-3-(2h-1,3-benzodioxol-5-ylmethyl)-4-[(4-hydroxy-3-methoxyphenyl)methyl]oxolan-2-one*		Lignans and Coumarins	Lignans	C20H20O6	3	-	541245	512906	587432	1.47033e+06	1.4233e+06	1.2573e+06	1.23407	0.0029462	0.0138184	0.395474	-1.33835	down
MWS20172	5-Hydroxymethyl-2-furaldehyde*		Others	Aldehyde compounds	C6H6O3	2	67-47-0	248683	349516	429010	1.38696e+06	654493	1.46505e+06	1.1084	0.0798733	0.138489	0.292944	-1.7713	down
Yxxp005044	Balanophonin		Lignans and Coumarins	Lignans	C20H20O6	3	118916-57-7	3.15177e+06	3.14862e+06	3.68703e+06	1.06703e+07	1.25274e+07	1.12075e+07	1.237	0.00225336	0.0113949	0.290289	-1.78444	down
MWS5164	N,N'-Dimethylarginine;SDMA*		Amino acids and derivatives	Amino acids and derivatives	C8H18N4O2	1	30344-00-4	9.01474e+06	9.49358e+06	9.18582e+06	2.91224e+07	3.07154e+07	2.97659e+07	1.2443	0.000181079	0.00326708	0.309074	-1.69398	down
MWSmce208	Norharmane; Beta-Carboline		Alkaloids	Plumerane	C11H8N2	3	244-63-3	1.46786e+06	961827	1.14094e+06	156616	156616	156616	1.23606	0.0199303	0.0515611	7.5995	2.9259	up
Lmhp009590	LysoPC 17:1		Lipids	LPC	C25H50NO7P	3	-	75623.4	31051	38456.3	107607	122650	138046	1.08847	0.015168	0.0428832	0.394052	-1.34354	down
MWS20201	1-O-Galloyl-beta-D-glucose		Phenolic acids	Phenolic acids	C13H16O10	3	58511-73-2	83410.1	137261	58143.8	829880	782379	685149	1.2122	0.000683959	0.0062612	0.121361	-3.04263	down
Lmjp004404	Quercetagetin-3-Methyl Ether		Flavonoids	Flavonols	C16H12O8	3	64190-88-1	49177.4	95465.3	58133.9	153231	149241	120317	1.08966	0.0167458	0.0457182	0.479616	-1.06005	down
MWSmce446	Cimifugin-7-O-glucoside		Others	Chromone	C22H28O11	2	80681-45-4	905225	585751	800947	2.30849e+06	1.482e+06	2.78614e+06	1.13973	0.0569939	0.109415	0.348495	-1.52079	down
ML10198935	N-Methylserotonin		Alkaloids	Plumerane	C11H14N2O	3	1134-01-6	4311.63	4311.63	4311.63	37310.5	50098.7	21558.1	1.21123	0.0605112	0.113864	0.118704	-3.07456	down
Zbsp003971	Chrysoeriol-6-C-glucoside-7-O-glucoside		Flavonoids	Flavones	C28H32O16	3	-	129192	181182	190720	25838.4	25838.4	25838.4	1.23436	0.0178468	0.0477467	6.46447	2.69253	up
Zmxp002867	Chrysoeriol-5,7-di-O-glucoside		Flavonoids	Flavones	C28H32O16	3	-	42605	59071.5	68605.7	134904	197700	112853	1.13312	0.0587623	0.111829	0.382264	-1.38736	down
Lhlp111209	Cupressic acid		Terpenoids	Ditepenoids	C20H32O3	1	1909-90-6	680001	361585	527885	1.07599e+06	1.34003e+06	891726	1.08113	0.0263845	0.06142	0.474485	-1.07557	down
Lmqp007331	Kaempferol-3-O-(3''-O-p-Coumaroyl)rhamnoside*		Flavonoids	Flavonols	C30H26O12	2	-	4687.23	4687.23	4687.23	83192.7	48061.3	96753	1.23038	0.0389849	0.0828283	0.0616722	-4.01924	down
Lajp007436	Imbricasin A*		Terpenoids	Ditepenoids	C20H30O3	3	-	2.27725e+06	2.12355e+06	2.1675e+06	140075	140075	140075	1.24498	0.000496992	0.00535961	15.6304	3.96628	up
Lajp009638	7-Methoxy-8-(3-methylbuta-1,3-dien-1-yl)-2H-chromen-2-one		Lignans and Coumarins	Coumarins	C15H14O3	3	112667-50-2	510846	500913	358547	71709.4	71709.4	71709.4	1.23542	0.0159332	0.0442987	6.36972	2.67123	up
Sacp008038	acorenone*		Terpenoids	Sesquiterpenoids	C15H24O	1	5956-05-8	98616.3	98616.3	98616.3	493082	600839	608899	1.24133	0.00627768	0.0233148	0.173741	-2.52499	down
Qmdp112301	Viterofolin C		Terpenoids	Ditepenoids	C20H32O2	3	-	53470.9	53470.9	53470.9	423583	420295	329485	1.24083	0.0082356	0.0278135	0.136712	-2.87079	down
Lmjp007881	Artemisinate*		Terpenoids	Sesquiterpenoids	C15H22O2	3	80286-58-4	37154	37154	37154	696162	757189	557828	1.24264	0.00856243	0.0283127	0.0554212	-4.17342	down
Lmjp003231	Patuletin-3-O-glucoside*		Flavonoids	Flavonols	C22H22O13	1	-	248870	160755	314272	1.87365e+06	1.92946e+06	507801	1.07674	0.122438	0.191528	0.167922	-2.57413	down
Wagp007236	7-Hydroxy-3',4',5,6-tetramethoxyflavone*		Flavonoids	Flavones	C19H18O7	3	40983-99-1	9634.38	9634.38	9634.38	93949.6	119585	75163.3	1.23664	0.0213942	0.053712	0.100116	-3.32026	down
pmp000234	Salcolin A*		Flavonoids	Flavones	C27H26O11	3	369390-51-2	117126	190628	116933	501637	544352	534006	1.20954	0.000774716	0.0067657	0.26879	-1.89545	down
MWSmce161	Gigantol(3,3'-Dihydroxy-5,4'-dimethoxybibenzyl)*		Others	Stilbene	C16H18O4	3	67884-30-4	893311	806028	856166	1.73548e+06	1.93868e+06	1.86866e+06	1.23701	0.00104951	0.00774082	0.461048	-1.11701	down
Lmtp005226	Santalol		Terpenoids	Sesquiterpenoids	C15H24O	3	11031-45-1	55814.4	55814.4	55814.4	624463	505242	279072	1.21285	0.0550208	0.106633	0.118857	-3.0727	down
Lmdp006732	Scutellarein-4'-methyl ether (5,6,7-Trihydroxy-4'-methoxyflavone)*		Flavonoids	Flavones	C16H12O6	3	6563-66-2	218141	162944	94094.3	1.12687e+06	1.15901e+06	1.16302e+06	1.21027	0.000514436	0.00542445	0.137777	-2.85959	down
Lhgp102103	Labda-8(17),12-diene-15-ol-16-al		Terpenoids	Ditepenoids	C20H32O2	2	-	17937	17937	17937	174128	272191	267333	1.23712	0.0204045	0.0520612	0.0754024	-3.72925	down
Qayp009909	Kolavenic Acid		Terpenoids	Ditepenoids	C20H32O2	3	25436-90-2	67216.2	67216.2	67216.2	617247	713040	586423	1.24343	0.00441708	0.0180422	0.105206	-3.24872	down
Zahp001902	Delphinidin-3-O-sambubioside		Flavonoids	Anthocyanidins	C26H29O16+	3	53158-73-9	12431.8	12431.8	12431.8	68163.2	62159	66671	1.2444	0.00114758	0.00817237	0.189323	-2.40108	down
Zmjp006969	Pectolinarigenin*		Flavonoids	Flavones	C17H14O6	1	520-12-7	6.36737e+06	7.00086e+06	6.56267e+06	1.55552e+07	1.50164e+07	1.49604e+07	1.24178	5.68056e-06	0.000475664	0.437733	-1.19188	down
Zbgp007629	3',4'-Dihydroxy-7,5'-dimethoxyflavone*		Flavonoids	Flavones	C17H14O6	1	-	6.36737e+06	7.00086e+06	6.56267e+06	1.55552e+07	1.50164e+07	1.49604e+07	1.24178	5.68056e-06	0.000475664	0.437733	-1.19188	down
Zblp007216	3,4-Dihydroxy-5,4'-dimethoxybibenzyl*		Others	Stilbene	C16H18O4	3	-	979884	832943	879063	1.92353e+06	1.86276e+06	2.01805e+06	1.23329	7.87095e-05	0.00203715	0.463772	-1.10851	down
Lmdp008003	3',5-Dihydroxy-3,4',5',7-tetramethoxyflavone*		Flavonoids	Flavones	C19H18O8	1	14290-57-4	30786.6	30786.6	30786.6	153933	253526	191583	1.23022	0.0283026	0.0650868	0.154179	-2.69732	down
Lmqp007185	Kaempferol-3-O-(4''-O-p-Coumaroyl)rhamnoside*		Flavonoids	Flavonols	C30H26O12	2	623927-14-0	27816.1	10926.5	28509.9	110420	53269.9	87046.2	1.08511	0.0537334	0.104565	0.26822	-1.89851	down
MWStz382	Spinacetin*		Flavonoids	Flavonols	C17H14O8	2	3153-83-1	42922.9	42922.9	42922.9	282227	214614	253122	1.24	0.0088242	0.0288433	0.1717	-2.54204	down
HJAP005	Laricitrin-3-O-glucoside*		Flavonoids	Flavonols	C22H22O13	1	39986-90-8	796912	721285	447184	89436.9	89436.9	89436.9	1.22492	0.0335075	0.0734945	7.32502	2.87283	up
Lasp003143	1,4-Benzodioxin-6-propanol		Lignans and Coumarins	Lignans	C11H12O3	3	-	383821	345530	377115	64144.2	64144.2	64144.2	1.24429	0.00149807	0.00894129	5.74989	2.52353	up
MWS4525	6-O-methylguanine		Nucleotides and derivatives	Nucleotides and derivatives	C6H7N5O	3	20535-83-5	160228	171776	186365	353254	329574	362232	1.23162	0.000205108	0.00347066	0.496018	-1.01154	down
Wbmp007855	Oxoflaccidin		Quinones	PhenAnthraquinones	C16H12O5	1	-	181119	68585.6	212261	1.34616e+06	1.58219e+06	1.47334e+06	1.19166	0.000242363	0.00380249	0.104952	-3.25219	down
Lmyp004084	Perillyl alcohol*		Terpenoids	Monoterpenoids	C10H16O	1	57717-97-2	579946	923597	994833	2.53268e+06	1.74019e+06	2.07968e+06	1.14674	0.014771	0.0419905	0.393287	-1.34634	down
MWSslk149	5-Methoxysalicylic acid		Phenolic acids	Phenolic acids	C8H8O4	3	2612-02-4	356583	345835	276109	541697	717795	757122	1.16949	0.0233634	0.0566573	0.485233	-1.04325	down
Jmcp004706	pterodontoside E		Terpenoids	Sesquiterpenoids	C21H38O8	3	-	55643.2	124767	58740.7	11128.6	11128.6	11128.6	1.20027	0.0931711	0.155394	7.16322	2.84061	up
Wajp004095	Apigenin-7-O-Gentiobioside		Flavonoids	Flavones	C27H30O15	3	-	932234	925054	2.02764e+06	192666	66867.4	200030	1.153	0.0873788	0.148076	8.45351	3.07955	up
Lmmp003109	3'-O-Methyl-epicatechin		Flavonoids	Flavanols	C16H16O6	2	76549-34-3	7.20148e+06	6.89932e+06	7.72242e+06	899410	840952	948642	1.24385	0.00121004	0.00834136	8.11573	3.02072	up
mws0124	N-(3-Indolylacetyl)-L-alanine		Amino acids and derivatives	Amino acids and derivatives	C13H14N2O3	3	57105-39-2	21709.5	114069	81088	4341.9	4341.9	4341.9	1.1602	0.128399	0.198454	16.6491	4.05737	up
Safp008433	Dichotosin		Flavonoids	Flavones	C23H28O9	3	-	1.79933e+07	1.16403e+07	1.28173e+07	557195	557195	557195	1.24099	0.019991	0.0516148	25.3956	4.66651	up
Laxp009625	(Z)-4,6-Dihydroxy-2-(4-Hydroxy-3-Methoxybenzylidene)-7-Methylbenzofuran-3(2h)-One		Flavonoids	Aurones	C17H14O6	3	-	905657	900579	990841	3.81145e+06	3.81494e+06	4.20696e+06	1.24264	0.00122737	0.0083998	0.236372	-2.08087	down
MWSHC2083	1,6-Dihydroxy-4(14)-eudesmene		Terpenoids	Sesquiterpenoids	C15H26O2	3	70389-88-7	147624	204846	98693.4	15648.6	15648.6	15648.6	1.22295	0.0481191	0.0963396	9.61029	3.26458	up
Zjtp092402	3,4'-dihydroxy-5-methoxybibenzyl		Others	Stilbene	C15H16O3	3	67884-29-1	44075.8	76409.8	122565	1.61652e+06	1.64546e+06	1.6931e+06	1.223	1.02162e-06	0.000264415	0.0490509	-4.34958	down
Yamp012546	(6S,6aS)-9,11-diphenoxy-6,6a-diphenyl-2,3,5,5a,6,6a,11b,11c,12,12a-decahydro-1H-benzofuro[2',3':4,5]cyclopenta[1,2-d]pyrrolo[1,2-a]pyrimidin-5-ol		Alkaloids	Alkaloids	C40H36N2O4	3	-	157846	78461.4	121403	15692.3	15692.3	15692.3	1.21994	0.0457491	0.0931006	7.59843	2.9257	up
Hmyp008708	Izalpinin*		Flavonoids	Flavonols	C16H12O5	1	480-14-8	223444	337640	188397	1.27845e+06	1.41299e+06	1.55125e+06	1.21958	0.000756686	0.00669032	0.176652	-2.50101	down
Lmhp009368	LysoPC 22:6		Lipids	LPC	C30H50NO7P	3	-	24336.3	28467.3	33479.1	63717.7	50642.4	78129.6	1.15956	0.0360361	0.0777233	0.448246	-1.15764	down
MWSprf168	Equol		Flavonoids	Other Flavonoids	C15H14O3	3	531-95-3	752003	701429	787174	1.78996e+06	1.72305e+06	1.8351e+06	1.24024	2.54245e-05	0.00118662	0.418953	-1.25514	down
Wbsp009547	3α,21β,24-trihydroxyserrat-14-en-16-one		Terpenoids	Triterpene	C30H48O4	3	-	2.73357e+06	2.80182e+06	3.0637e+06	7.84031e+06	3.74126e+06	7.16031e+06	1.04626	0.115717	0.182836	0.458817	-1.12401	down
MWSHY0040	Oroxin A		Flavonoids	Flavones	C21H20O10	2	57396-78-8	3.2968e+06	2.83654e+06	3.46264e+06	1.07836e+06	1.21957e+06	1.28707e+06	1.22925	0.00478477	0.0190488	2.67671	1.42046	up
pmp000235	Salcolin B*		Flavonoids	Flavones	C27H26O11	3	-	108656	171889	147344	562144	494813	532519	1.2186	0.000136254	0.00277908	0.269201	-1.89324	down
pmp000008	5-Desmethylsinensetin		Flavonoids	Flavones	C19H18O7	2	21763-80-4	89851.5	98599.1	100096	295188	239220	219811	1.22167	0.0188939	0.0497603	0.382576	-1.38618	down
Lacp005171	3-(3'-Hydroxybutyl)-2,4,4-trimethylcyclohexa-2,5-dienone glucoside		Terpenoids	Sesquiterpenoids	C19H30O7	1	-	5340.71	5340.71	5340.71	50005.9	119388	58680.4	1.21923	0.0835663	0.143149	0.0702497	-3.83136	down
MWSprf129	Pinoresinol dimethyl ether*		Lignans and Coumarins	Lignans	C22H26O6	3	29106-36-3	318517	297899	323634	149043	183912	136535	1.20444	0.00197402	0.0104075	2.00228	1.00164	up
Sacp008256	isoshyobunone*		Terpenoids	Sesquiterpenoids	C15H24O	1	21698-46-4	114108	114108	114108	598396	628232	570541	1.24441	0.00117772	0.00827895	0.19048	-2.39229	down
zjbp111632	14-hydroxy-α-humulene*		Terpenoids	Sesquiterpenoids	C15H24O	1	-	114108	114108	114108	598396	628232	570541	1.24441	0.00117772	0.00827895	0.19048	-2.39229	down
Lcyp000689	Cyanidin-3-O-gentiobioside*		Flavonoids	Anthocyanidins	C27H31O16+	2	47845-44-3	659393	283956	197369	1.97298e+06	1.46324e+06	2.23407e+06	1.13951	0.00801493	0.0272909	0.201175	-2.31348	down
Lsj214143	Soranjidiol; 1,6-Dihydroxy-2-methyl-9,10-anthraquinone		Quinones	Anthraquinone	C15H10O4	2	518-73-0	652508	586367	512702	8.73391e+06	8.99307e+06	9.172e+06	1.24343	6.44748e-05	0.00185414	0.0651169	-3.94082	down
HX1305	12,13-Dehydrogeranylgeraniol		Terpenoids	Monoterpenoids	C20H32O	2	352274-18-1	150857	150857	150857	2.5694e+06	2.08298e+06	1.04961e+06	1.21626	0.0597606	0.112811	0.079371	-3.65524	down
Hmqp001042	Butyl beta-D-glucoside		Others	Saccharides	C10H20O6	3	5391-18-4	46348.2	36718.1	36018.9	4431.72	4431.72	4431.72	1.24173	0.00881407	0.0288433	8.95703	3.16302	up
Lcsp003681	Val-Val-Leu		Amino acids and derivatives	Amino acids and derivatives	C16H31N3O4	3	-	13513.8	21561.8	33836.5	43833.6	51634.7	63329.5	1.04863	0.0216433	0.0540038	0.433961	-1.20436	down
Wcdp000970	acetophenone		Others	Others	C8H8O	3	98-86-2	356100	287549	372718	740287	767313	815383	1.21978	0.000255458	0.00393129	0.437527	-1.19256	down
pma0948	Phenylethanolamine		Alkaloids	Alkaloids	C8H11NO	3	7568-93-6	9225.09	9225.09	9225.09	364047	443947	435094	1.24442	0.00387317	0.0164952	0.0222633	-5.48919	down
Zbqp003387	N-(Octadenyl)nornicotine		Alkaloids	Pyridine alkaloids	C17H24N2O	3	-	1.43306e+06	1.27547e+06	1.3235e+06	255094	255094	255094	1.24407	0.0018289	0.00991785	5.26868	2.39744	up
Wadp007734	7-Oxo-2-hydroxy-6,18-epoxypimara-15-en-18-one		Terpenoids	Ditepenoids	C20H28O4	3	-	3.50151e+06	2.82075e+06	2.65401e+06	99970	99970	99970	1.24359	0.00793773	0.0272477	29.9299	4.90351	up
Smmp008919	Epirosmanol		Terpenoids	Ditepenoids	C20H26O5	3	-	3.73132e+06	3.67859e+06	3.58574e+06	515385	515385	515385	1.24501	0.000182461	0.00326708	7.11161	2.83018	up
Zbnp004170	Eriodictyol-3'-O-glucoside*		Flavonoids	Flavanones	C21H22O11	2	-	588161	588161	588161	5.14251e+06	4.03237e+06	5.34247e+06	1.24072	0.00906381	0.0292984	0.121543	-3.04046	down
Walp003622	6-beta-d-glucopyranosyloxyindole-3-carboxylic acid		Alkaloids	Plumerane	C15H17NO8	3	-	60603.1	60603.1	60603.1	358542	303016	428906	1.23725	0.0141565	0.0405469	0.166727	-2.58444	down
Lhnp111728	Massoniresinol; Vladinol A		Lignans and Coumarins	Lignans	C20H24O8	2	96087-10-4	78496.2	35101.5	46105.1	7020.29	7020.29	7020.29	1.2109	0.0710632	0.127968	7.58291	2.92275	up
pmp000608	Aurantio-obtusin beta-D-glucoside		Quinones	Anthraquinone	C23H24O12	1	129025-96-3	86532.2	20572.5	15132.7	115755	131139	196716	1.01284	0.0341842	0.0744624	0.275551	-1.85961	down
Lcyp000678	Prudomenin*		Flavonoids	Flavonols	C23H24O12	3	-	86532.2	20572.5	15132.7	115755	131139	196716	1.01284	0.0341842	0.0744624	0.275551	-1.85961	down
Wbtp007858	7-O-Methyltectorigenin; 4',5-Dihydroxy-6,7-Dimethoxyisoflavone		Flavonoids	Isoflavones	C17H14O6	3	1096-58-8	6.51111e+06	6.82095e+06	6.79829e+06	1.5055e+07	1.5233e+07	1.44992e+07	1.2434	0.00010034	0.00232251	0.449466	-1.15371	down
MWSmce415	Cirsimaritin*		Flavonoids	Flavones	C17H14O6	1	6601-62-3	6.51111e+06	6.82095e+06	6.79829e+06	1.5055e+07	1.5233e+07	1.44992e+07	1.2434	0.00010034	0.00232251	0.449466	-1.15371	down
Lmmp004504	2'-Hydroxygenistein		Flavonoids	Isoflavones	C15H10O6	3	1156-78-1	477279	432618	369699	69172.6	69172.6	69172.6	1.24091	0.0075385	0.0262694	6.16621	2.62438	up
MWSHY0009	Diosmetin (5,7,3'-Trihydroxy-4'-methoxyflavone)*		Flavonoids	Flavones	C16H12O6	3	520-34-3	163799	163799	163799	1.30954e+06	1.66183e+06	1.61604e+06	1.24229	0.00649721	0.0237368	0.107119	-3.22272	down
Lajp004391	Paniculin		Lignans and Coumarins	Coumarins	C15H16O5	3	-	318394	312546	282955	32081.7	32081.7	32081.7	1.24443	0.00161583	0.00931324	9.49548	3.24724	up
WaTKp05402	3-Ethynylbenzaldehyde		Others	Aldehyde compounds	C9H6O	3	77123-56-9	2.63194e+07	2.75718e+07	2.59275e+07	4.69736e+06	4.69736e+06	4.69736e+06	1.24479	0.000511883	0.00541758	5.66409	2.50184	up
pmf0472	Apigenin 7-O-[beta-D-apiosyl-(1→2)-beta-D-glucoside]		Flavonoids	Flavones	C26H28O14	3	26544-34-3	47612.9	91555.1	67427.8	4901.53	4901.53	4901.53	1.2321	0.037264	0.0797674	14.0497	3.81247	up
Zkep1869	Histidylleucine		Amino acids and derivatives	Amino acids and derivatives	C12H20N4O3	2	7763-65-7	56131.3	89628.5	110868	157011	187561	180393	1.08916	0.0142586	0.0407949	0.488847	-1.03255	down
Lskp211409	20,26-Dihydroxyecdysone*		Steroids	Steroid	C27H44O8	2	19458-46-9	24362.8	39473.1	41510	129800	116039	108425	1.19677	0.000614931	0.00607726	0.297365	-1.74969	down
Labp003707	Glucosyl corchoionoside C		Terpenoids	Monoterpenoids	C25H40O13	3	-	3807.26	3807.26	3807.26	51051.2	19036.3	47485.5	1.19796	0.0730869	0.130702	0.0971462	-3.3637	down
Lcfp067444	6,9-dihydroxymegastigmasta-5,7-dien-3-one9-O-beta-D-gentiobioside		Others	Others	C25H40O13	3	-	3807.26	3807.26	3807.26	51051.2	19036.3	47485.5	1.19796	0.0730869	0.130702	0.0971462	-3.3637	down
Zbkp000480	N2-Acetyl-L-lysine		Amino acids and derivatives	Amino acids and derivatives	C8H16N2O3	2	1946-82-3	1.31107e+07	1.40557e+07	1.31173e+07	3.48397e+07	3.55677e+07	3.57518e+07	1.24359	9.37945e-07	0.000264415	0.379464	-1.39796	down
pma2172	Cinnamoyltyramine		Alkaloids	Phenolamine	C17H17NO2	3	20384-14-9	6153.82	6153.82	6153.82	46497	49869	77240.5	1.23248	0.0336542	0.0737594	0.106341	-3.23323	down
HJAP057	Dihydroxy-dimethoxyflavone*		Flavonoids	Flavonols	C17H14O6	1	-	6.55087e+06	6.87104e+06	6.61167e+06	1.56208e+07	1.66585e+07	1.50229e+07	1.24139	0.00196275	0.0104033	0.423523	-1.23949	down
Lhmp122112	5-Pregnene-3,17,20-triol-20-O-glucoside*		Steroids	Cardiac glycoside	C27H44O8	2	-	43462.9	17535.3	32972.5	153298	131388	123899	1.17105	0.000926956	0.00733068	0.229991	-2.12035	down
Lcfp039656	Homophthalicacid		Phenolic acids	Phenolic acids	C9H8O4	1	89-51-0	168532	168532	168532	842662	901553	963379	1.24378	0.00224691	0.0113825	0.186733	-2.42095	down
MWS201465	Glu-Phe		Amino acids and derivatives	Amino acids and derivatives	C14H18N2O5	1	20556-22-3	302548	426919	2081.89	416.377	416.377	416.377	1.02815	0.193308	0.273718	585.646	9.19389	up
Qmxp101531	Inflexarabdonin J*		Terpenoids	Ditepenoids	C20H30O3	3	-	2.37478e+06	1.86828e+06	2.2528e+06	227012	227012	227012	1.24258	0.006143	0.0231032	9.53821	3.25372	up
Lhmp101304	Ranunculinin glucoside*		Others	Others	C11H16O8	3	-	47471.9	47471.9	47471.9	1.46686e+06	1.38994e+06	1.38901e+06	1.24503	0.000355511	0.00457981	0.0335427	-4.89786	down
HX1346	ranunculin*		Others	Others	C11H16O8	3	-	47471.9	47471.9	47471.9	1.46686e+06	1.38994e+06	1.38901e+06	1.24503	0.000355511	0.00457981	0.0335427	-4.89786	down
Zmlp007578	3,4,3'-Tri-O-methylellagic acid		Tannins	Tannin	C17H12O8	3	1617-49-8	328388	206255	182529	28286.8	28286.8	28286.8	1.22748	0.0430193	0.0892032	8.45121	3.07916	up
Zadp004927	12-O-methylspruceanone		Terpenoids	Ditepenoids	C20H28O2	3	-	4.28181e+07	4.31462e+07	4.34174e+07	2.43603e+08	2.73358e+08	7.43066e+07	1.06493	0.130998	0.201595	0.218821	-2.19218	down
Layp002880	5,7-Dihydroxychromone glucoside		Others	Chromone	C15H16O9	2	-	40048.5	40048.5	40048.5	200242	319355	299821	1.23063	0.0241342	0.0581301	0.146623	-2.76982	down
Lmpp003789	Cyanidin 3-O-(6-O-p-coumaroyl)glucoside		Flavonoids	Anthocyanidins	C30H27O13+	3	-	392338	251437	370255	50287.3	50287.3	50287.3	1.23186	0.0223524	0.0551864	6.72157	2.7488	up
MWSHY0080	Scolymoside*		Flavonoids	Flavones	C27H30O15	3	25694-72-8	392338	251437	370255	50287.3	50287.3	50287.3	1.23186	0.0223524	0.0551864	6.72157	2.7488	up
Wazcp04835	Phycoerythrobilin		Others	Others	C33H38N4O6	2	18097-67-1	476997	852375	681886	2.23631e+06	1.75686e+06	1.82237e+06	1.17859	0.00332925	0.0148797	0.345842	-1.53181	down
MWSslk187	Typhaneoside*		Flavonoids	Flavonols	C34H42O20	3	104472-68-6	901.775	901.775	901.775	37293.7	53697.6	17542.1	1.22472	0.077697	0.135958	0.0249262	-5.32619	down
Sadp007464	5-(hydroxymethyl)-7-methoxy-1,8-dimethyl-9,10-dihydrophenanthren-2-ol		Terpenoids	Ditepenoids	C18H20O3	3	-	1.29094e+06	1.53066e+06	1.20626e+06	241252	241252	241252	1.24076	0.00769023	0.0266676	5.56521	2.47644	up
Lmcp101902	Desrhamnosylacteoside		Phenolic acids	Phenolic acids	C23H26O11	2	-	283745	202582	202939	40516.3	40516.3	40516.3	1.23477	0.0197482	0.0512518	5.67068	2.50352	up
Lmcp101903	Desrhamnosylisoacteoside		Phenolic acids	Phenolic acids	C23H26O11	3	-	283745	202582	202939	40516.3	40516.3	40516.3	1.23477	0.0197482	0.0512518	5.67068	2.50352	up
Zmjp000966	Vidarabine		Nucleotides and derivatives	Nucleotides and derivatives	C10H13N5O4	3	5536-17-4	808268	748514	752877	97589.5	97589.5	97589.5	1.24476	0.00081735	0.00690213	7.88903	2.97985	up
pme2596	4-Pyridoxate		Others	Vitamin	C8H9NO4	3	82-82-6	12018.1	12018.1	12018.1	60090.4	97277.3	66595.5	1.22905	0.0319157	0.0713217	0.160983	-2.63502	down
Yajp004597	Grasshopper Ketone		Terpenoids	Monoterpenoids	C13H20O3	3	-	105761	105761	105761	1.25135e+06	629705	611526	1.21245	0.074808	0.132697	0.127291	-2.9738	down
Sahp003947	Staphylionoside A		Terpenoids	Sesquiterpenoids	C19H30O8	3	-	235042	206298	322199	41259.7	41259.7	41259.7	1.23202	0.0256752	0.0604109	6.16856	2.62493	up
Sazp010564	6-methoxy-1,1,4a,7-tetramethyl-2,3,4,10a-tetrahydrophenanthren-2-ol		Terpenoids	Ditepenoids	C19H26O2	3	-	2.19525e+07	2.11686e+07	2.2251e+07	4.56925e+07	4.18644e+07	4.45951e+07	1.24052	0.00137569	0.00865867	0.494673	-1.01545	down
Qmdp112509	Abietatrien-3β-ol		Terpenoids	Ditepenoids	C20H30O	3	-	2.13845e+07	2.20264e+07	2.11072e+07	4.37831e+07	4.27729e+07	4.56597e+07	1.24261	0.000549902	0.00571376	0.487975	-1.03512	down
pme2828	4-Nitrophenol		Others	Others	C6H5NO3	3	100-02-7	1.17648e+06	1.12265e+06	934346	186869	186869	186869	1.24105	0.00671912	0.0243376	5.7678	2.52802	up
Cmyp003288	Edgeworin		Lignans and Coumarins	Coumarins	C18H10O6	3	120028-43-5	9751.11	9751.11	9751.11	71859.9	65377.9	48755.5	1.23517	0.0169041	0.0459657	0.157282	-2.66858	down
pmp000570	Odoricarpan		Flavonoids	Isoflavones	C18H18O6	3	-	21822.6	21822.6	21822.6	162035	131111	109113	1.23522	0.0181857	0.0483876	0.162751	-2.61927	down
zjbp111627	baimuxifuranic acid		Terpenoids	Sesquiterpenoids	C15H24O3	3	-	22741	22741	22741	534984	995671	764818	1.23853	0.0306212	0.0689159	0.0297207	-5.07239	down
MWSCX022	Polylauioid I		Terpenoids	Ditepenoids	C20H28O5	3	-	134986	134986	134986	758215	850662	674928	1.24141	0.00650324	0.0237368	0.177317	-2.4956	down
Yalp007434	(3R,5R,7R,8R,9R,10S,13S,17R)-17-((3S,6S)-6-hydroxy-7,7-dimethyl-2,3,6,7-tetrahydrooxepin-3-yl)-4,4,8,10,13-pentamethyl-2,3,4,5,6,7,8,9,10,11,12,13,16,17-tetradecahydro-1H-cyclopenta[a]phenanthrene-3,7-diyl diacetate		Steroids	Steroid	C34H52O6	3	-	18957.7	26565.7	51230.8	3791.53	3791.53	3791.53	1.19774	0.0998943	0.164013	8.50616	3.08851	up
Zjyp102916	(1R,4aR,7R,8aR)-1,4a,8a-trimethyl-7-(prop-1-en-2-yl)-deca-hydronaphthalen-1-ol		Terpenoids	Sesquiterpenoids	C15H24O	1	-	70924.3	70924.3	70924.3	456112	354621	425085	1.24056	0.00766361	0.0266077	0.172172	-2.53808	down
Lhfp110801	Ligularone		Terpenoids	Sesquiterpenoids	C15H20O2	3	4234-94-0	84402.7	84402.7	84402.7	557630	607671	661637	1.24355	0.00326139	0.0146432	0.138597	-2.85103	down
pmb2406	LysoPC 17:0*		Lipids	LPC	C25H52NO7P	1	50930-23-9	202615	677599	564267	40523	40523	40523	1.18592	0.0912794	0.153227	11.882	3.5707	up
MWSHY0123	Wogonin		Flavonoids	Flavones	C16H12O5	2	632-85-9	42102.7	42102.7	42102.7	1.2578e+06	1.18348e+06	1.46057e+06	1.24427	0.00430107	0.0177209	0.0323713	-4.94914	down
Wayp006636	N-Octanoyl nornicotine		Alkaloids	Pyridine alkaloids	C17H26N2O	3	38854-10-3	119101	119101	119101	780425	977303	1.0227e+06	1.24097	0.00836861	0.027866	0.128506	-2.96009	down
Lkmp122714	Sonchuionoside A		Terpenoids	Sesquiterpenoids	C19H30O8	3	-	4075.63	4075.63	4075.63	39110.6	48627.5	68492.2	1.2348	0.0310089	0.0696782	0.0782619	-3.67555	down
Zapp009110	Desmethylxanthohumol		Flavonoids	Chalcones	C20H20O5	3	115063-39-3	105627	105038	78124	291628	287415	248641	1.2184	0.000817839	0.00690213	0.348911	-1.51907	down
Hmcp002399	Limocitrin-3-O-glucoside		Flavonoids	Flavonols	C23H24O13	2	38836-51-0	391130	219847	579110	43969.4	43969.4	43969.4	1.20392	0.0766928	0.134614	9.02209	3.17346	up
MWSHY0062	2',4'-Dihydroxy-6'-methoxychalcone; (E)-Cardamonin		Flavonoids	Chalcones	C16H14O4	2	18956-16-6	65459.8	166448	212574	868762	802946	771799	1.15734	0.000489575	0.00531993	0.181903	-2.45876	down
Zbsp004136	Quercetin-3-O-(6''-O-arabinosyl)glucoside*		Flavonoids	Flavonols	C26H28O16	3	-	42376	145412	24232.6	4846.52	4846.52	4846.52	1.13816	0.223195	0.305645	14.5823	3.86615	up
Yalp012806	Neocembrene		Terpenoids	Ditepenoids	C20H32	3	31570-39-5	395427	395427	395427	1.97713e+06	2.41428e+06	2.07892e+06	1.24201	0.00557467	0.0213321	0.183341	-2.4474	down
MWSslk214	Corylin		Flavonoids	Isoflavones	C20H16O4	3	53947-92-5	21652.9	21652.9	21652.9	123472	156982	108265	1.23591	0.0173197	0.0466943	0.16711	-2.58113	down
Wbtp006564	4,8,10-Trihydroxy-2-methoxy-1,2-dihydrofuro[3,2-a]xanthen-11-one*		Flavonoids	Other Flavonoids	C16H12O7	3	-	885241	709631	1.10651e+06	2.88274e+06	1.73491e+06	1.59573e+06	1.0893	0.0934918	0.155656	0.434768	-1.20168	down
pmp000436	Taraxerol		Terpenoids	Triterpene	C30H50O	3	127-22-0	235939	76759.9	119611	15352	15352	15352	1.19076	0.113636	0.180536	9.38663	3.23061	up
Wcop008957	geopyxin B		Terpenoids	Ditepenoids	C20H28O4	3	-	4.76976e+06	2.93607e+06	4.17489e+06	134473	134473	134473	1.24062	0.0193542	0.0506446	29.45	4.8802	up
pmd0130	LysoPC 14:0		Lipids	LPC	C22H46NO7P	2	20559-16-4	8282.85	8282.85	8282.85	57781.4	54854.5	41414.3	1.2371	0.0134162	0.0387382	0.161302	-2.63217	down
Zbsp009834	Methyl-[6]-shogaol methoxy		Phenolic acids	Phenolic acids	C19H28O4	3	-	26294.7	26294.7	26294.7	189587	156982	131474	1.23652	0.0156032	0.0438513	0.165015	-2.59933	down
Lmyp004052	Quercetin-3-O-(6''-O-p-Coumaroyl)galactoside		Flavonoids	Flavonols	C30H26O14	2	-	1995.16	1995.16	1995.16	20785.2	9975.79	15038.5	1.21765	0.0511471	0.100982	0.130689	-2.93579	down
Hmyp009288	Epinootkatol		Terpenoids	Sesquiterpenoids	C15H24O	3	-	13869.4	13869.4	13869.4	99974.1	69347.1	133235	1.22229	0.0421578	0.0880581	0.137522	-2.86226	down
mws1500	Ethyl cinnamate		Phenolic acids	Phenolic acids	C11H12O2	3	103-36-6	538057	635415	586085	89041.8	89041.8	89041.8	1.24344	0.0031766	0.0145165	6.58701	2.71962	up
Lhmp112604	Vitexilactone		Terpenoids	Ditepenoids	C22H34O5	3	61263-49-8	5617.99	5617.99	5617.99	103830	53795.3	65040.3	1.23062	0.0454995	0.0926588	0.0756919	-3.72372	down
Wbtp005759	1,2,5,7,8-pentahydroxy-3-methylanthracene-9,10-dione		Quinones	Quinones	C15H10O7	1	-	3.32291e+06	3.32291e+06	3.32291e+06	1.66146e+07	2.20087e+07	1.83077e+07	1.23954	0.0101939	0.0317665	0.175102	-2.51373	down
Zmjp003291	Vitexin-2''-O-galactoside*		Flavonoids	Flavones	C27H30O15	3	-	320500	426431	531411	64100	64100	64100	1.23017	0.0271397	0.0628971	6.64764	2.73284	up
pmp001164	Iristectorin B		Flavonoids	Isoflavones	C23H24O12	3	94396-09-5	39750.2	14694.1	56224.4	267368	279159	203945	1.15377	0.00392737	0.0166387	0.147465	-2.76155	down
Sayp007217	caesaldekarin B		Terpenoids	Ditepenoids	C20H30O3	3	-	22332.7	22332.7	22332.7	208519	113774	111663	1.21473	0.0619156	0.115362	0.154389	-2.69536	down
pmp001265	2-Amino-4-dihydroxy octadecyl galactoside		Alkaloids	Alkaloids	C24H49NO8	3	-	111374	107457	68595.6	236943	247571	158611	1.10466	0.0339913	0.0742126	0.446922	-1.16191	down
pmp001125	Dendrobin A		Phenolic acids	Phenolic acids	C16H18O4	3	-	743338	643516	708417	1.40387e+06	1.38397e+06	1.45734e+06	1.23497	7.00536e-05	0.00191772	0.493565	-1.01869	down
pmp000024	Isobyakangelicol		Lignans and Coumarins	Coumarins	C17H16O6	3	35214-81-4	651451	669713	330056	65810.8	65810.8	65810.8	1.21508	0.0481014	0.0963396	8.36347	3.0641	up
pmb0864	LysoPE 14:0		Lipids	LPE	C19H40NO7P	3	-	19835.7	26993.7	6081.15	1142.53	1142.53	1142.53	1.17324	0.115009	0.18221	15.4366	3.94828	up
Waptp03252	Procyanidin B7		Tannins	Proanthocyanidins	C30H26O12	1	-	291213	145016	199019	13378.9	13378.9	13378.9	1.23181	0.0433075	0.0896051	15.8272	3.98433	up
Hmcp002187	Limocitrin-3-O-galactoside*		Flavonoids	Flavonols	C23H24O13	1	-	60011.2	60011.2	60011.2	613754	853222	358243	1.21497	0.0616954	0.115044	0.0986367	-3.34173	down
Zmgp004436	Okanin-4'-(6''-O-acetyl)glucoside*		Flavonoids	Chalcones	C23H24O13	1	-	60011.2	60011.2	60011.2	613754	853222	358243	1.21497	0.0616954	0.115044	0.0986367	-3.34173	down
pme2527	L-Ornithine		Amino acids and derivatives	Amino acids and derivatives	C5H12N2O2	3	348-66-3	1.09256e+06	1.02526e+06	1.08616e+06	4.65102e+06	4.76809e+06	4.96726e+06	1.24421	0.000339484	0.00444535	0.22271	-2.16676	down
MWStz170	Cyclo(L-Leu-trans-4-hydroxy-L-Pro)		Amino acids and derivatives	Amino acids and derivatives	C11H18N2O3	3	115006-86-5	10501.9	27624.5	23794.7	219.38	219.38	219.38	1.23386	0.0589059	0.112028	94.0849	6.55589	up
NK10246260	2,4-Dihydroxyquinoline		Alkaloids	Quinoline alkaloids	C9H7NO2	3	86-95-3	29697.1	29697.1	29697.1	330167	247393	148486	1.21387	0.0560822	0.107737	0.122708	-3.0267	down
Lazp002953	Nagilactone C diglucoside		Terpenoids	Ditepenoids	C31H42O17	3	-	9236.7	21197.5	26161	1774.2	1774.2	1774.2	1.19905	0.0765826	0.134504	10.633	3.41048	up
Wcfp003211	1,1'-(6-hydroxy-2,3-dihydro-1H-indene-2,5-diyl)bis(ethan-1-one)		Terpenoids	Sesquiterpenoids	C13H14O3	3	-	195547	195547	195547	1.95124e+06	2.125e+06	2.10453e+06	1.24478	0.000863384	0.00708373	0.0949138	-3.39724	down
Lssp210422	Genistein*		Flavonoids	Isoflavones	C15H10O5	3	446-72-0	356589	436122	397263	1.79315e+06	2.3097e+06	2.25406e+06	1.23648	0.00795322	0.0272477	0.187194	-2.41739	down
MWSHY0104	Luteolin 7-O-beta-D-glucoside*		Flavonoids	Flavones	C21H20O11	1	5373-11-5	5.98447e+06	1.27392e+07	8.72848e+06	1.19689e+06	1.19689e+06	1.19689e+06	1.21593	0.0557679	0.107423	7.64539	2.93459	up
Safp009165	Homobutein 4-glucoside		Flavonoids	Chalcones	C22H24O10	3	-	5.98447e+06	1.27392e+07	8.72848e+06	1.19689e+06	1.19689e+06	1.19689e+06	1.21593	0.0557679	0.107423	7.64539	2.93459	up
Xmyp005654	Kaempferol-4'-O-glucoside*		Flavonoids	Flavonols	C21H20O11	1	52222-74-9	5.98447e+06	1.27392e+07	8.72848e+06	1.19689e+06	1.19689e+06	1.19689e+06	1.21593	0.0557679	0.107423	7.64539	2.93459	up
Lafp002342	2,3-Dihydroxy-1-(4-hydroxy-3,5-dimethoxyphenyl)propan-1-one		Others	Ketone compounds	C11H14O6	3	33900-74-2	20939.4	45839.4	40522	4187.88	4187.88	4187.88	1.21255	0.0529548	0.103831	8.54059	3.09434	up
Sayp008439	caesalpinin ML		Terpenoids	Ditepenoids	C20H32O2	3	-	384577	81524.6	234400	16304.9	16304.9	16304.9	1.16846	0.131086	0.201622	14.3209	3.84005	up
MWSmce072	Vincamine		Alkaloids	Plumerane	C21H26N2O3	3	1617-90-9	1.51512e+06	863738	393542	78708.3	78708.3	78708.3	1.17987	0.121549	0.190242	11.7412	3.55351	up
mws0333	5-Methoxytryptamine		Alkaloids	Plumerane	C11H14N2O	3	608-07-1	10862.4	10862.4	10862.4	74928.9	54311.8	119368	1.21311	0.0642844	0.118316	0.131078	-2.9315	down
pmb0296	1-Oleoyl-Sn-Glycerol		Lipids	Glycerol ester	C21H40O4	3	129784-87-8	1642.72	1642.72	1642.72	44015.7	30664.2	8213.59	1.15958	0.130637	0.201319	0.0594517	-4.07214	down
Lahp003599	Homoeriodictyol-7,4'-di-O-β-D-glucopyranoside		Flavonoids	Flavanones	C28H34O16	3	-	10830.6	10830.6	10830.6	77546.5	81693.4	54152.8	1.23335	0.01962	0.0510586	0.152263	-2.71537	down
Hmhp002834	Cyanidin 3-xyloside		Flavonoids	Anthocyanidins	C20H19O10+	3	29761-24-8	29872	70763.1	71016.5	5974.4	5974.4	5974.4	1.20384	0.0643943	0.118354	9.57706	3.25958	up
pme2836	5-Hydroxytryptophol		Alkaloids	Plumerane	C10H11NO2	3	154-02-9	300712	220805	416280	44161	44161	44161	1.22336	0.0418917	0.0876309	7.07863	2.82347	up
Cmsp006710	3',4-Dihydroxy-3,5'-dimethoxybibenzyl*		Others	Stilbene	C16H18O4	3	83088-28-2	884298	908864	860381	1.88484e+06	1.85913e+06	2.11051e+06	1.23775	0.00452486	0.0183508	0.453249	-1.14162	down
MWSslk123	4'-Methoxychalcone		Flavonoids	Chalcones	C16H14O2	3	959-23-9	171291	261396	289381	34258.3	34258.3	34258.3	1.22809	0.0285178	0.0653583	7.02574	2.81265	up
pme1398	Delphinidin-3-O-glucoside (Mirtillin)		Flavonoids	Anthocyanidins	C21H21O12+	3	50986-17-9	56344.9	56344.9	56344.9	491846	549881	628649	1.24271	0.0062165	0.0232567	0.101196	-3.30478	down
pme0152	5,6-Dihydrothymine		Nucleotides and derivatives	Nucleotides and derivatives	C5H8N2O2	3	696-04-8	211562	187004	202784	668103	606003	661353	1.24091	0.000651934	0.0061365	0.310702	-1.6864	down
Lmhp008233	LysoPE 18:4		Lipids	LPE	C23H40NO7P	3	-	14430.3	12632.2	16448	1123.29	1123.29	1123.29	1.24296	0.00671685	0.0243376	12.9116	3.6906	up
pme0033	Hypoxanthine		Nucleotides and derivatives	Nucleotides and derivatives	C5H4N4O	3	68-94-0	53447.3	270374	266951	1.39531e+06	1.83147e+06	1.50439e+06	1.12577	0.00234822	0.0116743	0.124868	-3.00153	down
Zblp006200	4-Hydroxy-4'-methoxydihydrochalcone		Flavonoids	Chalcones	C16H16O3	3	206194-36-7	195093	114106	246513	22821.3	22821.3	22821.3	1.21552	0.0519549	0.102011	8.11688	3.02092	up
Zmmp002167	L-Glutamyl-L-Tyrosine		Amino acids and derivatives	Amino acids and derivatives	C14H18N2O6	3	-	338195	344983	316037	1.37869e+06	1.26253e+06	1.36909e+06	1.2432	0.00082066	0.00690213	0.249161	-2.00485	down
Lahp002857	Epicatechin-(4β→8)-epigallocatechin		Flavonoids	Flavanols	C30H26O13	1	-	1.13436e+06	1.29353e+06	762591	1.6336e+06	3.22015e+06	2.5813e+06	1.06162	0.0790475	0.13772	0.429113	-1.22057	down
MWSslk197	Secoxyloganin		Terpenoids	Monoterpenoids	C17H24O11	3	58822-47-2	67823	30333.6	80350.1	6066.72	6066.72	6066.72	1.20152	0.0707799	0.127619	9.80798	3.29396	up
Zmgp003417	1-(4-hydroxyphenyl)-7-phenylhepta-3,5-dione		Others	Ketone compounds	C19H20O3	3	-	2.19612e+06	2.27473e+06	2.53967e+06	5.0554e+06	4.96288e+06	5.13402e+06	1.23673	0.000228747	0.00368196	0.462671	-1.11194	down
WaXYp03037	2,3-Dihydroxy-3,7-dimethyl-6-octenyl β-D-glucopyranoside		Terpenoids	Monoterpenoids	C16H30O8	1	-	14097.4	42058.6	19356.5	2819.47	2819.47	2819.47	1.18816	0.121136	0.189929	8.92749	3.15825	up
WaYp007725	2-O-(Feruloyl) Dihydroxyacetophenone		Others	Ketone compounds	C18H16O6	3	-	76055	76055	76055	757231	655229	380275	1.21915	0.043569	0.0897547	0.127272	-2.97401	down
Ydyp005399	Cernuoside*		Flavonoids	Aurones	C21H20O11	1	480-69-3	79457.6	109320	32944.8	215417	517836	336881	1.09597	0.0764989	0.13444	0.207191	-2.27096	down
Hmcp002316	Isorhamnetin-3-O-arabinoside*		Flavonoids	Flavonols	C21H20O11	1	-	79457.6	109320	32944.8	215417	517836	336881	1.09597	0.0764989	0.13444	0.207191	-2.27096	down
Wahlp01697	Methyl 3-oxo-2-phenylpropanoate		Phenolic acids	Phenolic acids	C10H10O3	1	5894-79-1	1027.67	1027.67	1027.67	14828	5138.36	11560.9	1.19686	0.079511	0.138143	0.0977889	-3.35419	down
Yamp001634	dehydroconiferyl alcohol		Others	Others	C10H10O3	3	-	1027.67	1027.67	1027.67	14828	5138.36	11560.9	1.19686	0.079511	0.138143	0.0977889	-3.35419	down
mws0596	3-Hydroxyanthranilate		Alkaloids	Alkaloids	C7H7NO3	3	548-93-6	196427	225388	42636.5	8527.31	8527.31	8527.31	1.15609	0.123128	0.192381	18.1555	4.18233	up
pma0214	6-C-Methylquercetin-3-O-glucoside*		Flavonoids	Flavonols	C22H22O12	1	-	6.41434e+06	6.4456e+06	5.97853e+06	1.19571e+06	1.19571e+06	1.19571e+06	1.24455	0.000878167	0.00710226	5.2517	2.39279	up
Zbsp004450	3'-O-Methyltricetin-7-O-glucoside*		Flavonoids	Flavones	C22H22O12	1	-	6.41434e+06	6.4456e+06	5.97853e+06	1.19571e+06	1.19571e+06	1.19571e+06	1.24455	0.000878167	0.00710226	5.2517	2.39279	up
Lmmp003091	Multinoside A*		Flavonoids	Flavonols	C27H30O16	3	59262-54-3	2510.39	2510.39	2510.39	28641	12552	58424.3	1.16737	0.149754	0.225105	0.0756012	-3.72545	down
MWSslk148	Rutin Trihydrate		Flavonoids	Flavonols	C27H36O19	3	207671-50-9	2510.39	2510.39	2510.39	28641	12552	58424.3	1.16737	0.149754	0.225105	0.0756012	-3.72545	down
Lmjp101206	Murpaniculol		Lignans and Coumarins	Coumarins	C15H16O5	3	-	89173.3	89173.3	89173.3	683259	747742	906229	1.24141	0.00909443	0.0292984	0.11446	-3.12708	down
Zbqp003444	4-amino-5-oxo-5-(pentylamino)pentanoic acid		Amino acids and derivatives	Amino acids and derivatives	C10H20N2O3	2	-	288179	327340	270376	763480	910236	918820	1.23083	0.00413563	0.0172641	0.34171	-1.54916	down
ZbWp003008	N-Ethylphenylalanine		Amino acids and derivatives	Amino acids and derivatives	C11H15NO2	3	-	531053	502629	328101	34759.8	34759.8	34759.8	1.23624	0.0221522	0.0548888	13.059	3.70697	up
Qmmp111813	Ent-Sessilifol M		Terpenoids	Ditepenoids	C20H30O2	3	-	382232	185281	256704	37056.1	37056.1	37056.1	1.21781	0.053955	0.104925	7.41413	2.89028	up
Wafp003601	N-Feruloylmethylagmatine		Alkaloids	Phenolamine	C16H24N4O3	3	-	47003.6	73021.9	96877.4	9400.72	9400.72	9400.72	1.21834	0.0486317	0.0972293	7.691	2.94317	up
pmf0526	Isoimperatorin		Lignans and Coumarins	Coumarins	C16H14O4	3	482-45-1	3.01415e+06	1.2782e+06	1.4279e+06	68392.9	68392.9	68392.9	1.22845	0.0804142	0.139088	27.8793	4.80112	up
Cmbp005523	1,3-O-Dicaffeoylglycerol		Phenolic acids	Phenolic acids	C21H20O9	3	-	182286	159243	44634.3	8926.87	8926.87	8926.87	1.17196	0.106472	0.172231	14.4195	3.84995	up
MWSmce577	Ethyl p-methoxycinnamate		Phenolic acids	Phenolic acids	C12H14O3	3	1929-30-2	483582	444489	615742	88897.9	88897.9	88897.9	1.23749	0.014492	0.0413001	5.78871	2.53324	up
MWSmce389	Beta-asarone		Others	Others	C12H16O3	3	5273-86-9	893099	579187	860116	1.91689e+06	1.92783e+06	1.80834e+06	1.1889	0.00361253	0.0156305	0.412591	-1.27721	down
Hasp013107	Saurufuran B		Terpenoids	Ditepenoids	C20H28O3	3	425368-87-2	34212.8	34212.8	34212.8	2.81399e+06	2.5023e+06	2.4878e+06	1.24489	0.00171334	0.00965486	0.0131519	-6.24859	down
Zmbp006041	6-methyl luteolin		Flavonoids	Flavones	C16H12O6	3	-	30377.7	30377.7	30377.7	251443	262516	151889	1.2256	0.0321007	0.0716227	0.136868	-2.86914	down
Wdhp002567	3,6-dimethoxyphenanthren-4-ol		Phenolic acids	Phenolic acids	C16H14O3	3	481-81-2	428197	401568	362228	210038	194966	190142	1.22847	0.00539621	0.0208453	2.00286	1.00206	up
MW0106261	Cys-Leu-Lys		Amino acids and derivatives	Amino acids and derivatives	C15H30N4O4S1	3	-	816.452	816.452	816.452	11217.8	15007.1	4082.26	1.18193	0.101213	0.165873	0.0808176	-3.62919	down
Wbsp003565	Acetylfawcettine		Alkaloids	Alkaloids	C20H31NO4	3	-	468877	1.02549e+06	505385	93775.5	93775.5	93775.5	1.20382	0.0859752	0.146445	7.10829	2.8295	up
pmb1562	1-Stearidonoyl-Glycerol		Lipids	Glycerol ester	C21H34O4	3	-	132090	54776.6	28872.6	5774.51	5774.51	5774.51	1.16453	0.16652	0.243819	12.4535	3.63848	up
Lmjp005016	Cirsiliol (3',4',5-Trihydroxy-6,7-Dimethoxyflavone)		Flavonoids	Flavones	C17H14O7	1	34334-69-5	33013	33013	33013	188631	186583	165065	1.24353	0.0026158	0.012601	0.183311	-2.44764	down
pmp000110	7-Hydroxy-3,5,6,8-tetramethoxyflavone*		Flavonoids	Flavonols	C19H18O7	3	-	9601.14	9601.14	9601.14	78835.8	123555	88746.2	1.23667	0.0232121	0.0564639	0.0989342	-3.33739	down
pmb0863	LysoPC 16:2(2n isomer)*		Lipids	LPC	C24H46NO7P	3	-	84949.2	70840.5	99601	45479	29143.8	36183.3	1.16246	0.0130988	0.0380923	2.30484	1.20467	up
pme2266	Biotin		Others	Vitamin	C10H16N2O3S	2	58-85-5	1.74098e+06	2.12654e+06	1.93369e+06	264105	264105	264105	1.24295	0.00441463	0.0180422	7.32186	2.87221	up
pmf0289	Riboprine		Nucleotides and derivatives	Nucleotides and derivatives	C15H21N5O4	3	7724-76-7	34457.4	5153.38	28248.6	1030.68	1030.68	1030.68	1.14466	0.136472	0.208777	21.9465	4.45592	up
Lmbp003208	Fraxidinglucoside		Lignans and Coumarins	Coumarins	C17H20O10	3	58970-71-1	786126	576976	449963	883408	1.48988e+06	1.43122e+06	1.05411	0.0555945	0.10738	0.476558	-1.06928	down
MWSmce016	Nicotinic Acid Methyl Ester(Methyl Nicotinate)		Alkaloids	Pyridine alkaloids	C7H7NO2	3	93-60-7	420953	388257	480042	61070.4	61070.4	61070.4	1.24267	0.00526532	0.0205648	7.03697	2.81495	up
Wadp008128	3-Oxo-9beta-pimara-7,15-dien-19,6beta-olide		Terpenoids	Ditepenoids	C20H26O3	3	-	43893.3	54253.2	41070.6	107190	104307	70321	1.13126	0.0450671	0.0919099	0.493995	-1.01743	down
mws2627	Tamarixetin		Flavonoids	Flavonols	C16H12O7	3	603-61-2	37051.5	37051.5	37051.5	243358	213323	185258	1.24008	0.00887036	0.0289238	0.173154	-2.52987	down
MWSmce472	7-Amino-4-(trifluoromethyl)coumarin		Lignans and Coumarins	Coumarins	C10H6F3NO2	3	53518-15-3	68452.2	23874.3	35811.8	4774.86	4774.86	4774.86	1.19521	0.104374	0.16963	8.94534	3.16114	up
Zbjp002538	1,7-bis(4-hydroxypheny)hept-1-ene-3-ol		Phenolic acids	Phenolic acids	C19H22O3	2	-	159543	159543	159543	890292	1.05208e+06	1.17204e+06	1.24056	0.00852225	0.0282455	0.153682	-2.70198	down
Smlp003674	Nagilactone B		Terpenoids	Terpene	C19H24O7	3	19891-51-1	1.04988e+06	1.34253e+06	1.35369e+06	209977	209977	209977	1.23961	0.00904442	0.0292984	5.94685	2.57213	up
MWSslk129	Verbenone		Terpenoids	Monoterpenoids	C10H14O	3	1196-01-6	2.07006e+06	2.0793e+06	1.95574e+06	1.02172e+06	894395	921284	1.23664	3.99464e-05	0.00149641	2.15166	1.10545	up
Wacyp04942	2,7-Dimethyl-2,4-Octadiene-1,8-Diol 8-O-B-D-Glucopyranoside		Terpenoids	Monoterpenoids	C16H28O7	1	-	35939.7	56666.3	30125.6	5107.78	5107.78	5107.78	1.22429	0.0470685	0.0949486	8.00944	3.0017	up
Laxp007582	7,2'-dihydroxy-4'-methoxy-isoflavanol		Flavonoids	Isoflavones	C16H16O5	3	-	696275	927465	693743	2.18663e+06	2.63686e+06	2.32868e+06	1.2222	0.00135369	0.00865867	0.324026	-1.62582	down
MWSmce064	Haematoxylin		Phenolic acids	Phenolic acids	C16H14O6	3	517-28-2	1.44501e+06	1.23856e+06	1.34621e+06	290702	496819	405858	1.20438	0.000360315	0.00459685	3.37679	1.75565	up
MWS04567g	S-Hexyl-glutathione		Amino acids and derivatives	Amino acids and derivatives	C16H29N3O6S	3	24425-56-7	2918.08	2918.08	2918.08	30702.9	52556	21224.7	1.21646	0.0751175	0.132901	0.0837858	-3.57715	down
Wadp007964	7-Oxo-pimara-8,11,15-trien-2-ol		Terpenoids	Ditepenoids	C20H28O2	3	-	2.04246e+06	2.04246e+06	2.04246e+06	3.16101e+07	2.47375e+07	2.51872e+07	1.24278	0.00770857	0.0266987	0.0751505	-3.73407	down
Cmcp004793	Lochnericine		Alkaloids	Plumerane	C21H24N2O3	3	72058-36-7	85834	85834	85834	429170	708876	837000	1.22073	0.0414998	0.0869388	0.130378	-2.93923	down
Wacyp07258	Kaempferol 3-(3,6-Di-P-Coumaroylglucoside)		Flavonoids	Flavonols	C39H32O15	1	-	1041.41	1041.41	1041.41	8571.7	5207.06	13436.5	1.20445	0.0782418	0.136624	0.114797	-3.12284	down
Zbkp007535	Artemisin		Terpenoids	Ditepenoids	C15H18O4	3	481-05-0	22413.2	22413.2	22413.2	157056	112066	145067	1.23724	0.0132601	0.0384044	0.16234	-2.62291	down
Hmgp002036	Nepetin-7-O-glucoside(Nepitrin)*		Flavonoids	Flavones	C22H22O12	1	569-90-4	6.07729e+06	5.21574e+06	4.13715e+06	827431	827431	827431	1.23573	0.0164925	0.0453225	6.2161	2.63601	up
Lmjp002906	Rhamnetin-3-O-Glucoside*		Flavonoids	Flavonols	C22H22O12	1	27875-34-9	6.07729e+06	5.21574e+06	4.13715e+06	827431	827431	827431	1.23573	0.0164925	0.0453225	6.2161	2.63601	up
Lmjp003295	6-Methoxykaempferol-3-O-glucoside*		Flavonoids	Flavonols	C22H22O12	1	63422-27-5	6.07729e+06	5.21574e+06	4.13715e+06	827431	827431	827431	1.23573	0.0164925	0.0453225	6.2161	2.63601	up
Ladp004020	tenuiflorin C glucoside*		Flavonoids	Other Flavonoids	C22H22O12	1	-	6.07729e+06	5.21574e+06	4.13715e+06	827431	827431	827431	1.23573	0.0164925	0.0453225	6.2161	2.63601	up
Wagp008739	7,8-Dihydrofurocoumarin		Lignans and Coumarins	Coumarins	C11H8O3	3	51559-40-1	399831	624757	531165	2.1741e+06	2.1661e+06	2.90195e+06	1.21857	0.0117788	0.0351976	0.214819	-2.21881	down
Lajp002603	Epigallocatechin-(2β→7,4β→8)-gallocatechin		Flavonoids	Flavanols	C30H24O14	2	-	173057	363615	301664	855892	512134	722531	1.08002	0.0330866	0.0729083	0.401011	-1.31829	down
mws2105	Benzyl salicylate		Phenolic acids	Phenolic acids	C14H12O3	3	118-58-1	1.32667e+06	1.15201e+06	1.15812e+06	2.86358e+06	3.05561e+06	2.697e+06	1.23375	0.000641779	0.0061365	0.422089	-1.24438	down
Qmjp011019	Petiolin E		Others	Others	C19H24O9	3	-	2.00522e+06	2.76875e+06	2.71742e+06	1.14169e+06	1.14488e+06	1.04345e+06	1.20133	0.0282838	0.0650868	2.24966	1.1697	up
Smzp003409	11-O-Syringoylbergenin		Lignans and Coumarins	Coumarins	C23H24O13	3	-	4399.09	4399.09	4399.09	84240.2	21995.5	54463.2	1.18045	0.111693	0.178346	0.0821243	-3.60605	down
Hmlp005443	6,7-Dihydroxyflavone		Flavonoids	Flavones	C15H10O4	3	38183-04-9	65743.8	60740.8	26911.1	5382.22	5382.22	5382.22	1.20427	0.0642903	0.118316	9.50015	3.24795	up
Wbtp004815	5-hydroxy-6,8-dimethoxy-2,3-dimethylbenzo[g]chromen-4-one		Others	Xanthone	C17H16O5	3	-	712403	712403	712403	1.10626e+07	1.46394e+07	9.08409e+06	1.23896	0.021593	0.0540009	0.0614386	-4.02471	down
Lmjp101204	Isomeranzin		Lignans and Coumarins	Coumarins	C15H16O4	3	1088-17-1	596559	629773	760843	1.24414e+06	1.26825e+06	1.48756e+06	1.20346	0.00337828	0.0150281	0.4968	-1.00926	down
Wbtp004798	8,11-dimethoxy-2h-[1,3]dioxolo[4,5-b]xanthen-10-one		Flavonoids	Other Flavonoids	C16H12O6	3	-	1.53975e+06	1.00549e+06	1.17614e+06	5.84152e+06	4.55224e+06	6.76646e+06	1.21535	0.0155917	0.0438513	0.216861	-2.20516	down
Lmqp002170	Kaempferol 3-sophorotrioside		Flavonoids	Flavonols	C33H40O21	3	80714-53-0	15728.9	24222.3	14019.5	2693.17	2693.17	2693.17	1.22562	0.0400003	0.0844814	6.67994	2.73983	up
Zmlp008132	17-Hydroxy Jolkinolide A (Caudicifolin)		Terpenoids	Ditepenoids	C20H26O4	3	-	1.42577e+07	1.38227e+07	1.23821e+07	2.9008e+06	3.487e+06	2.9163e+06	1.23879	0.00124463	0.00845549	4.34889	2.12065	up
Waqkp06484	1-Linolenoylglycerol		Lipids	Glycerol ester	C21H36O4	1	-	116249	136037	105784	348230	377850	415086	1.23083	0.00160268	0.00931187	0.313776	-1.67219	down
mws1401	N5-Ethyl-L-glutamine		Amino acids and derivatives	Amino acids and derivatives	C7H14N2O3	3	3081-61-6	86844.1	86844.1	86844.1	3.20817e+06	3.10898e+06	3.2099e+06	1.24508	0.000116578	0.00251438	0.0273466	-5.1925	down
Lcfp061528	Dibutylamine		Alkaloids	Alkaloids	C8H19N	2	111-92-2	169182	110810	145496	19120.5	19120.5	19120.5	1.2357	0.018551	0.0491298	7.41765	2.89096	up
Lmwp102904	N,N-Dimethyl-5-methoxytryptamine		Alkaloids	Plumerane	C13H18N2O	3	1019-45-0	65882.3	65882.3	65882.3	517975	869214	735021	1.23478	0.0245123	0.058743	0.0931327	-3.42457	down
pmp000284	Fraxidin (8-Hydroxy-6,7-dimethoxycoumarin)		Lignans and Coumarins	Coumarins	C11H10O5	3	525-21-3	13655.6	13655.6	13655.6	166703	234489	177594	1.24121	0.0134669	0.0388452	0.0707805	-3.8205	down
Laxp006028	Sulphuretin*		Flavonoids	Aurones	C15H10O5	3	120-05-8	4.7514e+06	4.50362e+06	4.83294e+06	600799	600799	600799	1.24486	0.000584174	0.00589327	7.81623	2.96647	up
MWStz699	3',4',7-Trihydroxyisoflavone*		Flavonoids	Isoflavones	C15H10O5	3	485-63-2	4.7514e+06	4.50362e+06	4.83294e+06	600799	600799	600799	1.24486	0.000584174	0.00589327	7.81623	2.96647	up
Sasp003574	Grevilloside B		Others	Others	C17H26O8	3	-	22904	22904	22904	310669	114520	180771	1.20034	0.0897664	0.151311	0.113394	-3.14059	down
mws1526	Sweroside		Terpenoids	Monoterpenoids	C16H22O9	2	14215-86-2	22904	22904	22904	310669	114520	180771	1.20034	0.0897664	0.151311	0.113394	-3.14059	down
Zjmp102029	methyl-iso-ophiopogonanone A		Flavonoids	Other Flavonoids	C19H18O6	3	-	5794.35	5794.35	5794.35	52053.3	28971.7	42051.7	1.2259	0.0341478	0.0744624	0.141237	-2.82381	down
pmd0146	LysoPC 20:2(2n isomer)		Lipids	LPC	C28H54NO7P	3	-	220662	215968	261734	550632	590540	455516	1.21093	0.0102488	0.0317806	0.437383	-1.19303	down
Lcfp224172	Dipropyleneglycoldibenzoate*		Others	Others	C20H22O5	1	20109-39-1	68410.9	42819.2	75930.9	4434.34	4434.34	4434.34	1.23412	0.0286273	0.0653583	14.0691	3.81445	up
Walbp08740	3,3'-Oxydipropyl dibenzoate		Phenolic acids	Phenolic acids	C20H22O5	3	94-51-9	68410.9	42819.2	75930.9	4434.34	4434.34	4434.34	1.23412	0.0286273	0.0653583	14.0691	3.81445	up
Lhfp112926	Myricatomentogenin*		Others	Others	C20H22O5	1	-	68410.9	42819.2	75930.9	4434.34	4434.34	4434.34	1.23412	0.0286273	0.0653583	14.0691	3.81445	up
Wbwp010459	5-[(2r,3s,4s,5s)-5-(2h-1,3-benzodioxol-5-yl)-3,4-dimethyloxolan-2-yl]-2-methoxyphenol		Lignans and Coumarins	Lignans	C20H22O5	3	-	68410.9	42819.2	75930.9	4434.34	4434.34	4434.34	1.23412	0.0286273	0.0653583	14.0691	3.81445	up
Zmmp003258	Glu-Pro-Leu		Amino acids and derivatives	Amino acids and derivatives	C16H27N3O6	3	-	12909.3	13763.5	14257.3	81939.9	77412.9	65132	1.2403	0.00640957	0.0236068	0.182329	-2.45538	down
Zbsp008181	Persicogenin (5,3'-dihydroxy-7,4'-dimethoxyflavanone)		Flavonoids	Flavanones	C17H16O6	3	28590-40-1	1.25479e+06	1.17887e+06	752769	108784	108784	108784	1.23252	0.0258196	0.0605506	9.76383	3.28745	up
Lhcp090202	3-(Acetyloxy)-13,15-dihydroxyoleanan-12-one (Rubiprasin A)		Terpenoids	Triterpene	C32H52O5	3	125263-65-2	43933.7	59456.5	53950	150288	135881	134217	1.22239	0.000229879	0.00368196	0.374276	-1.41782	down
MWSslk009	Xanthone		Flavonoids	Other Flavonoids	C13H8O2	3	90-47-1	708990	544131	450402	46003.9	46003.9	46003.9	1.23824	0.020341	0.0520086	12.3433	3.62566	up
Smmp009329	Isorosmanol		Terpenoids	Ditepenoids	C20H26O5	3	93780-80-4	215548	215548	215548	1.07774e+06	1.17327e+06	1.14205e+06	1.24454	0.000942409	0.00739878	0.190578	-2.39154	down
Wcdp007388	10,14,16-Octadecatrien-12-Ynoic Acid		Lipids	Free fatty acids	C18H26O2	2	-	28498.6	28498.6	28498.6	333641	332809	691258	1.22538	0.0708826	0.127723	0.0629706	-3.98918	down
MWStz554	Methyl 4-caffeoylquinate		Phenolic acids	Phenolic acids	C17H20O9	2	123372-74-7	93305.2	61002.5	90700.5	12200.5	12200.5	12200.5	1.23228	0.0215278	0.0539046	6.69394	2.74285	up
Zbqp002313	4-amino-5-(butylamino)-5-oxopentanoic acid		Amino acids and derivatives	Amino acids and derivatives	C9H18N2O3	3	-	27544.3	32451	28991.6	96129.4	54011.9	84119.2	1.16233	0.0590601	0.112175	0.379863	-1.39645	down
Lhmp121005	Symplocosin		Lignans and Coumarins	Lignans	C26H32O11	3	11042-30-1	20698.5	21820.1	11449.2	2289.84	2289.84	2289.84	1.2197	0.0411263	0.0862834	7.85612	2.97382	up
WaYp004901	Reseoside		Terpenoids	Monoterpenoids	C19H30O7	1	-	56801.2	56801.2	56801.2	525775	448923	595070	1.24172	0.00808859	0.0274472	0.108553	-3.20352	down
pmb0382	O-Feruloyl 4-hydroxycoumarin		Lignans and Coumarins	Coumarins	C19H14O6	3	-	872055	1.00361e+06	863382	1.93001e+06	1.94866e+06	2.05853e+06	1.23397	6.80202e-05	0.00191138	0.461337	-1.11611	down
pmp000344	3',4',7-Trihydroxyflavone		Flavonoids	Flavones	C15H10O5	1	2150-11-0	213950	213950	213950	1.70625e+06	1.36318e+06	1.42412e+06	1.24199	0.00670621	0.0243376	0.142838	-2.80754	down
Wbtp005363	5,6-dihydroxy-1-methoxyxanthen-9-one*		Flavonoids	Other Flavonoids	C14H10O5	3	-	165440	63976.9	89429.5	12795.4	12795.4	12795.4	1.20136	0.091872	0.153678	8.30628	3.0542	up
Lmdp003509	Quercetin-3-O-xyloside (Reynoutrin)*		Flavonoids	Flavonols	C20H18O11	1	549-32-6	149794	65828.1	84228.8	13165.6	13165.6	13165.6	1.20873	0.0764556	0.13444	7.59175	2.92443	up
MWStz735	Ganoderal A		Terpenoids	Triterpene	C30H44O2	3	104700-98-3	224960	293722	165425	33084.9	33084.9	33084.9	1.22642	0.0343044	0.0746671	6.89244	2.78501	up
Lamp007903	15-Hydroxy-T-muurolol		Terpenoids	Sesquiterpenoids	C15H26O2	3	-	131926	85008	132614	14075	14075	14075	1.23311	0.0228464	0.0558795	8.27824	3.04932	up
Lcyp000676	Isoscopoletin-β-D-glucoside		Lignans and Coumarins	Coumarins	C16H18O9	3	20186-29-2	138681	166472	205680	17248.7	17248.7	17248.7	1.23894	0.0157482	0.0439729	9.87189	3.30333	up
Zmgp004718	1-(4-hydroxy-3-methoxyphenyl)-7-phenyl-3,5-diheptanone		Others	Ketone compounds	C20H22O4	3	-	18491	18491	18491	158580	92454.9	100476	1.22439	0.0418003	0.087504	0.157813	-2.66371	down
Lcfp121029	4-O-beta-L-Galactopyranosyl-3,6-anhydro-L-galactose		Others	Saccharides	C12H20O10	2	-	1.0716e+06	962862	499472	99894.3	99894.3	99894.3	1.21352	0.0512511	0.101047	8.45538	3.07987	up
Sayp007892	demethylcaesaldekarin C		Terpenoids	Ditepenoids	C20H28O4	3	-	626472	626472	626472	3.73165e+06	3.13236e+06	4.12173e+06	1.23993	0.00886563	0.0289238	0.171078	-2.54727	down
Yhhp003898	phlomuroside*		Terpenoids	Monoterpenoids	C19H32O8	1	-	53516	96554.8	438506	10703.2	10703.2	10703.2	1.114	0.267207	0.353997	18.3302	4.19615	up
zjmp122401	Aseleposide E*		Terpenoids	Monoterpenoids	C19H32O8	1	-	53516	96554.8	438506	10703.2	10703.2	10703.2	1.114	0.267207	0.353997	18.3302	4.19615	up
Smgp006499	Buddlenoid A*		Flavonoids	Flavonols	C30H26O13	1	142750-32-1	16581	16581	16581	197327	82905.2	174511	1.20718	0.0610035	0.114412	0.109387	-3.19249	down
Lmyp004407	Kaempferol-3-O-(2''-p-Coumaroyl)galactoside*		Flavonoids	Flavonols	C30H26O13	1	-	16581	16581	16581	197327	82905.2	174511	1.20718	0.0610035	0.114412	0.109387	-3.19249	down
MWSmce017	7,8-Dihydroxycoumarin		Lignans and Coumarins	Coumarins	C9H6O4	3	486-35-1	65947	65947	65947	509422	634599	329735	1.22212	0.040654	0.0855447	0.134243	-2.89708	down
Sadp003970	2-O-P-Cumaroylglycerol		Phenolic acids	Phenolic acids	C12H14O5	3	-	38352.8	291778	113659	7670.57	7670.57	7670.57	1.13808	0.202917	0.285705	19.2854	4.26944	up
Wacyp03375	1-O-Glutamoyl-3-O-Galloyl-5-O-caffeoylshikimic acid		Phenolic acids	Phenolic acids	C28H28N2O14	3	-	14087.5	9195.34	12801.5	1839.07	1839.07	1839.07	1.23344	0.0200332	0.0516148	6.54033	2.70936	up
pmp000170	Andrographidine C		Flavonoids	Flavones	C23H24O10	2	113963-39-6	167029	63830	77641.6	12766	12766	12766	1.1947	0.108395	0.174745	8.05527	3.00993	up
Lmsp004045	Isorhamnetin-3-O-glucoside-7-O-rhamnoside		Flavonoids	Flavonols	C28H32O16	3	17331-71-4	2452.99	2452.99	2452.99	31083	40286.6	29491.3	1.24174	0.0114544	0.0344359	0.0729617	-3.77672	down
Qmxp082409	Minheryin G		Terpenoids	Ditepenoids	C20H30O5	3	-	14071.8	14071.8	14071.8	322597	313243	270438	1.24432	0.0030932	0.0143193	0.046581	-4.42412	down
Zjtp092403	3,4'-dihydroxy-4,5-dimethoxybibenzyl		Others	Stilbene	C16H18O4	3	-	107447	107447	107447	1.16875e+06	1.51506e+06	1.61392e+06	1.24148	0.010215	0.0317806	0.0750024	-3.73692	down
Zbsp004894	3'-O-Methyltricetin-7-O-(6''-malonyl)glucoside*		Flavonoids	Flavones	C25H24O15	3	-	25664.8	23284.4	26597.5	3166.33	3166.33	3166.33	1.24424	0.00200126	0.0104543	7.95312	2.99152	up
Zbpp002027	Isorhamnetin-3-O-(6''-malonyl)glucoside*		Flavonoids	Flavonols	C25H24O15	3	-	25664.8	23284.4	26597.5	3166.33	3166.33	3166.33	1.24424	0.00200126	0.0104543	7.95312	2.99152	up
Lhfp110807	Petasiphenol		Tannins	Tannin	C18H16O7	3	145904-50-3	28072.3	28072.3	28072.3	162553	196630	242959	1.2364	0.0177329	0.0475382	0.139862	-2.83793	down
Smgp006258	6,7,3',4'-Tetrahydroxyaurone-6-O-(6''-O-p-Coumaroyl)glucoside*		Flavonoids	Aurones	C30H26O13	1	-	17405.6	17405.6	17405.6	116127	132966	87027.8	1.23388	0.0195164	0.050882	0.155351	-2.6864	down
Lmyp004318	Kaempferol-3-O-(6''-p-Coumaroyl)galactoside*		Flavonoids	Flavonols	C30H26O13	1	-	17405.6	17405.6	17405.6	116127	132966	87027.8	1.23388	0.0195164	0.050882	0.155351	-2.6864	down
Wagp010678	5-Hydroxy-3,3',4',5',7-Pentamethoxyflavone*		Flavonoids	Flavonols	C20H20O8	2	5084-19-5	11922.4	10552.5	17541.2	2110.51	2110.51	2110.51	1.22798	0.0344014	0.074821	6.32015	2.65996	up
Zmbp008419	6-prenylnaringenin		Flavonoids	Flavanones	C20H20O5	3	68236-13-5	76322.9	87047.5	61097.7	4352.65	4352.65	4352.65	1.24173	0.0112215	0.0338787	17.1901	4.10351	up
Zbqp000676	3-(triazan-2-yl)propyl L-prolinate		Amino acids and derivatives	Amino acids and derivatives	C8H18N4O2	1	-	1.49252e+06	1.41937e+06	1.41913e+06	6.31043e+06	5.25614e+06	5.43174e+06	1.2405	0.00569611	0.0216802	0.254792	-1.97261	down
MWSmce463	Mesitaldehyde		Others	Aldehyde compounds	C10H12O	3	487-68-3	631435	702094	749699	46598	46598	46598	1.24425	0.00280067	0.0133114	14.9021	3.89745	up
Lmmp003530	3,4-Divanillyltetrahydrofuran		Lignans and Coumarins	Lignans	C20H24O5	2	34730-78-4	31527.9	31527.9	31527.9	859023	807706	1.40364e+06	1.23873	0.0350196	0.0758757	0.0308052	-5.02068	down
Jmcp010061	costic acid		Terpenoids	Sesquiterpenoids	C15H22O2	3	3650-43-9	66610.1	66610.1	66610.1	691353	694894	690379	1.2451	4.80719e-06	0.000475664	0.0962283	-3.37739	down
mws4168	Praeruptorin A		Lignans and Coumarins	Coumarins	C21H22O7	3	73069-25-7	507521	369775	309615	88436.6	163796	171305	1.11797	0.0329773	0.0727802	2.80237	1.48665	up
Zmhp005586	Herbacetin-7-O-(3''-glucosyl)rhamnoside; Rhodiosin		Flavonoids	Flavonols	C27H30O16	3	86831-54-1	9316.98	15473.4	43186.5	1863.4	1863.4	1863.4	1.15855	0.183993	0.263363	12.16	3.60407	up
MWSHY0019	Neohesperidin		Flavonoids	Flavanones	C28H34O15	3	13241-33-3	9316.98	15473.4	43186.5	1863.4	1863.4	1863.4	1.15855	0.183993	0.263363	12.16	3.60407	up
pmp000607	1-desmethylaurantio-obtusin-2-O-β-D-glucoside		Quinones	Anthraquinone	C22H22O12	3	-	5.58908e+06	3.47029e+06	611254	122251	122251	122251	1.1311	0.164502	0.241659	26.3682	4.72073	up
Lcfp033189	7-methoxy-5,6,8-trihydroxycoumarin-5-beta-glucopyranoside		Lignans and Coumarins	Coumarins	C16H18O11	2	-	122086	87545.1	119086	17509	17509	17509	1.23676	0.0140965	0.0404564	6.25806	2.64572	up
Wbsp000161	Lannotinidine C		Alkaloids	Alkaloids	C26H35NO5	3	-	980251	941872	1.38205e+06	188374	188374	188374	1.23335	0.0229553	0.0560494	5.84682	2.54765	up
Zmsp000758	1-(Hydroxymethyl)hexahydro-1h-pyrrolizin-2-ol		Alkaloids	Pyrrole alkaloids	C8H15NO2	2	-	2.88821e+07	2.81587e+07	2.7792e+07	6.25202e+07	6.07251e+07	6.13898e+07	1.24428	5.35489e-06	0.000475664	0.459462	-1.12198	down
pmp001141	Cimicifugamide		Alkaloids	Phenolamine	C25H31NO10	3	-	36991.1	27424.5	150710	5484.9	5484.9	5484.9	1.13097	0.236405	0.320193	13.0738	3.7086	up
MWS00216g	L-Phenylalaninol		Amino acids and derivatives	Amino acids and derivatives	C9H13NO	3	3182-95-4	2281.3	2281.3	2281.3	11406.5	337609	293855	1.07746	0.173803	0.2522	0.0106458	-6.55357	down
pmp001309	6-Hydroxykaempferol-7-O-glucoside		Flavonoids	Flavonols	C21H20O12	2	-	5.05316e+06	4.6046e+06	6.32426e+06	920921	920921	920921	1.23803	0.0133862	0.0386909	5.7848	2.53227	up
Zmzp005934	Octadecanamide		Alkaloids	Alkaloids	C18H37NO	3	124-26-5	8927.25	2086.57	3720.61	417.314	417.314	417.314	1.16819	0.161188	0.237897	11.7693	3.55695	up
mws2218	Caffeine		Alkaloids	Alkaloids	C8H10N4O2	3	58-08-2	3727.43	3727.43	3727.43	187500	68939.7	345218	1.20846	0.13308	0.203917	0.0185858	-5.74966	down
Zmjp003597	Ampelopsisionoside		Terpenoids	Sesquiterpenoids	C19H32O8	1	138665-44-8	103310	35843.9	137437	6839.9	6839.9	6839.9	1.18181	0.103626	0.168778	13.4792	3.75267	up
MW0156492	S-Adenosylhomocysteine-d4		Nucleotides and derivatives	Nucleotides and derivatives	C14H16D4N6O5S	3	-	103310	35843.9	137437	6839.9	6839.9	6839.9	1.18181	0.103626	0.168778	13.4792	3.75267	up
Hmcp001824	Ailanindole		Alkaloids	Plumerane	C12H8N2O2	3	159903-51-2	222764	358815	469640	44552.9	44552.9	44552.9	1.21696	0.0503993	0.0999908	7.86496	2.97544	up
Lagp003233	3'-Hydroxy-4'-O-β-D-glucosylpuerarin*		Flavonoids	Isoflavones	C27H30O15	3	-	210598	340126	371579	42119.6	42119.6	42119.6	1.22532	0.0327888	0.0724203	7.29908	2.86771	up
Lahp003733	Clausenaglycoside A		Phenolic acids	Phenolic acids	C17H26O8	3	-	327162	291747	331668	47347.7	47347.7	47347.7	1.24402	0.00218652	0.011176	6.69218	2.74248	up
Lmap001821	Helicide		Phenolic acids	Phenolic acids	C13H16O7	3	80154-34-3	91938.4	76577.3	95835.4	14865.9	14865.9	14865.9	1.24146	0.00637873	0.0235592	5.92746	2.56742	up
mws1509	Phenyl salicylate		Phenolic acids	Phenolic acids	C13H10O3	3	118-55-8	21069.7	21069.7	21069.7	332750	186241	105348	1.19121	0.106711	0.172518	0.101241	-3.30413	down
pmd0136	LysoPC 18:0(2n isomer)		Lipids	LPC	C26H54NO7P	1	-	10097.6	10097.6	10097.6	310004	337827	503588	1.24086	0.0251626	0.0595427	0.026309	-5.2483	down
WaTKp05525	4a-Methyl-4a,5,8,8a-tetrahydro-2(1H)-naphthalenone		Others	Ketone compounds	C11H14O	3	17429-21-9	1.86635e+06	2.3642e+06	1.90082e+06	246377	246377	246377	1.2418	0.00788087	0.0271036	8.29539	3.05231	up
pmb0496	Feruloylagmatine		Alkaloids	Phenolamine	C15H22N4O3	2	-	179589	120698	185546	371240	397652	389739	1.18719	0.0039154	0.0166127	0.419316	-1.25389	down
Qmyp101331	3β-Acetoxyspirillanone		Terpenoids	Sesquiterpenoids	C17H26O3	1	-	158205	317250	176363	766898	816839	507880	1.14023	0.0209108	0.0527774	0.311634	-1.68208	down
Lssp210198	2α,7β,13α-Triacetoxy-5α,9α-Dihydroxy-2(3→20)paclitaxel-4(20),11-diene-10-one		Others	Others	C26H36O9	3	-	39133.8	93346.2	70669.3	7826.75	7826.75	7826.75	1.20926	0.0625015	0.116133	8.65192	3.11302	up
Lcfp121048	hex-2-enylbenzoate		Others	Others	C13H16O2	2	28343-61-5	1.71861e+06	1.88446e+06	2.07709e+06	142941	142941	142941	1.24399	0.0034833	0.0152551	13.2459	3.72748	up
mws0154	Shikimate		Organic acids	Organic acids	C7H10O5	1	138-59-0	692372	592006	613389	2.32871e+06	1.77864e+06	1.78481e+06	1.22548	0.0161375	0.0446487	0.322084	-1.63449	down
Waptn06085	DGMG 18:3(2n isomer)		Lipids	Glycerol ester	C33H56O14	1	-	40635.1	43248.1	25952.2	79853.1	160612	130234	1.14122	0.0596741	0.112779	0.296293	-1.75491	down
mws0213	Ribitol		Others	Saccharides	C5H12O5	3	488-81-3	4.82276e+06	4.19344e+06	4.44482e+06	1.59008e+06	1.58367e+06	1.66952e+06	1.24059	0.00340843	0.0150915	2.77933	1.47474	up
mws0943	N1-Methyl-4-pyridone-5-carboxamide		Alkaloids	Pyridine alkaloids	C7H8N2O2	3	769-49-3	4.82276e+06	4.19344e+06	4.44482e+06	1.59008e+06	1.58367e+06	1.66952e+06	1.24059	0.00340843	0.0150915	2.77933	1.47474	up
MWSmce690	Erythorbic Acid; Isoascorbic Acid		Others	Vitamin	C6H8O6	1	89-65-6	5.81259e+06	6.51798e+06	7.83688e+06	3.01978e+06	2.854e+06	3.01257e+06	1.21633	0.0232242	0.0564639	2.26949	1.18237	up
Lcgn000234	davidioside C		Phenolic acids	Phenolic acids	C15H16O9	3	-	153572	167221	155859	369795	396218	382210	1.2417	9.84357e-05	0.00232011	0.415122	-1.26839	down
pme0534	D-Gluconic acid		Others	Saccharides	C6H12O7	1	526-95-4	1.44355e+06	1.47281e+06	1.50346e+06	452581	465470	456624	1.24473	0.000158755	0.00301317	3.21517	1.6849	up
Walbn00444	6''-Carboxyraffinose		Others	Saccharides	C18H30O17	1	104880-42-4	1.05252e+06	906870	1.00083e+06	333228	306807	359956	1.23676	0.0017684	0.00980201	2.96024	1.56571	up
Zbzn008048	Embelin		Quinones	Quinones	C17H26O4	1	550-24-3	915043	1.01928e+06	839083	291263	310775	244671	1.23064	0.00287903	0.0136053	3.27551	1.71172	up
Zaln004057	4-caffeoylshikimic acid		Phenolic acids	Phenolic acids	C16H16O8	1	-	694679	798737	696749	239496	234162	247014	1.24026	0.00449382	0.018277	3.03906	1.60363	up
Zmtn001624	N-Acetylisatin		Alkaloids	Plumerane	C10H7NO3	3	574-17-4	6.68086e+06	6.77534e+06	6.90936e+06	1.25168e+06	1.15509e+06	1.1279e+06	1.24423	3.17489e-06	0.000451945	5.76167	2.52649	up
Waln010743	1-(2,3-dihydroxypropoxy)-3-(((2-(dimethylamino)ethoxy)(hydroxy)phosphoryl)oxy)propan-2-yl (11Z,14Z)-octadeca-11,14-dienoate		Lipids	LPE	C28H54NO9P	1	-	16330.6	24647.6	15608.2	41473	56696.4	53013.7	1.17604	0.00723554	0.0255261	0.37429	-1.41777	down
Zmhn003257	5,7,2'-Trihydroxy-8-methoxyflavone*		Flavonoids	Flavones	C16H12O6	3	80713-32-2	857227	830952	896903	5.47776e+06	5.53953e+06	5.68281e+06	1.24464	4.44279e-05	0.00154207	0.154794	-2.69157	down
Ylyn013135	demethylregelin		Terpenoids	Triterpene	C30H46O4	3	173991-81-6	3.74083e+06	3.92999e+06	4.20616e+06	2.42916e+07	2.53668e+07	2.42638e+07	1.24408	6.01541e-05	0.00178395	0.160669	-2.63784	down
MWS20022	15S-Hydroxy-8,11,13-eicosatrienoic acid		Lipids	Free fatty acids	C20H34O3	1	92693-02-2	370408	366802	369160	1.43417e+06	1.48795e+06	1.46974e+06	1.24494	0.000195847	0.00339986	0.251914	-1.989	down
Zjbn102515	3-hydroxy-5-methoxybibenzyl		Others	Stilbene	C15H16O2	3	-	2.10161e+06	2.53029e+06	2.7621e+06	5.2756e+06	5.26115e+06	5.20828e+06	1.21815	0.00443247	0.0180791	0.469609	-1.09047	down
Zjbn102516	3,3'-Dihydroxy-5-methoxybibenzyl		Others	Stilbene	C15H16O3	1	-	242601	222462	253179	3.63109e+06	3.31063e+06	3.74355e+06	1.2441	0.00145324	0.00884054	0.0672179	-3.89501	down
Lmbn005454	Naringenin-5-methyl ether		Flavonoids	Flavones	C16H14O5	2	61823-56-1	1.17285e+06	1.29739e+06	1.66093e+06	6.35926e+06	5.73034e+06	6.1015e+06	1.23227	5.19502e-05	0.00168071	0.227098	-2.13861	down
Wahsn07750	Chrysoeriol-7-O-(3''-Z-p-coumaroylglucoside)		Flavonoids	Flavones	C31H28O13	2	-	92422.4	86170.3	103276	369754	313864	314643	1.2362	0.00374393	0.0160769	0.28236	-1.82439	down
Wbwn006953	Cagayanone A		Lignans and Coumarins	Lignans	C20H18O5	3	-	486444	474064	497151	1.09307e+06	1.09425e+06	1.16866e+06	1.24264	0.00082109	0.00690213	0.434347	-1.20308	down
Lmbn005287	(7S,8S)-DiHODE		Lipids	Free fatty acids	C18H32O4	2	143288-65-7	141636	135661	153369	339094	349311	303035	1.23384	0.00240171	0.011871	0.434384	-1.20296	down
Wahsn07701	Quercetin 3-O-(3'-O-p-coumaroyl,6'-O-feruloyl)-glucoside		Flavonoids	Flavonols	C40H34O17	2	-	13665.2	11786.1	13354	31331.5	35837	32332.5	1.23459	0.00143901	0.00879157	0.389999	-1.35846	down
Wahsn11969	1-O-p-Coumaroyl Dodecanediol		Lipids	Free fatty acids	C21H32O4	1	-	1.32138e+07	1.31e+07	1.33506e+07	3.22897e+06	3.12311e+06	3.14108e+06	1.24495	2.56797e-06	0.000397572	4.17822	2.06289	up
Zazn006864	Nor-toralactone		Others	Others	C14H10O5	3	-	750401	717986	895649	5.65007e+06	5.90951e+06	6.15028e+06	1.2419	0.000192926	0.0033905	0.133487	-2.90523	down
pmn001694	9,10,13-Trihydroxy-11-Octadecenoic Acid		Lipids	Free fatty acids	C18H34O5	2	29907-57-1	1.02813e+06	1.02831e+06	990801	2.84644e+06	2.90268e+06	2.891e+06	1.24469	3.25917e-07	0.000205782	0.352686	-1.50355	down
pme2074	Jasmonoyl-L-Isoleucine		Amino acids and derivatives	Amino acids and derivatives	C18H29NO4	3	120330-93-0	394913	365279	357511	165056	150854	161687	1.23948	0.000992045	0.00749165	2.34027	1.22667	up
Zmdn006929	Aloe-Emodin-9-Anthrone		Quinones	Anthraquinone	C15H12O4	1	6247-99-0	148816	138716	173003	407688	424155	424375	1.23427	0.000150528	0.00298051	0.366603	-1.44771	down
Xmbn007315	Chestnutlignansoide		Lignans and Coumarins	Lignans	C26H34O10	3	-	300267	303902	297629	1.60858e+06	1.58921e+06	1.62167e+06	1.24505	2.88167e-05	0.00126217	0.187116	-2.418	down
Wagn011658	1-Palmitoyl-Sn-Glycerol 3-O-Diglucoside		Lipids	Glycerol ester	C31H58O14	3	-	34957.5	34942.4	29350	88851.5	105378	130686	1.2176	0.0230234	0.0561195	0.305463	-1.71093	down
mws0914	Pinobanksin		Flavonoids	Flavanonols	C15H12O5	1	548-82-3	2.1345e+06	2.0895e+06	2.12184e+06	4.91676e+06	4.96139e+06	5.03075e+06	1.2448	1.55615e-05	0.000851992	0.425641	-1.23229	down
Wahsn09317	Kaempferol-3-O-(3'-O-p-coumaroyl,6'-O-cinnamoyl)-glucoside*		Flavonoids	Flavonols	C39H32O14	2	-	737123	657156	676315	145559	144581	138532	1.2437	0.00179698	0.00989555	4.83026	2.2721	up
mws1505	Phenethyl caffeate		Phenolic acids	Phenolic acids	C17H16O4	3	104594-70-9	100945	123774	110633	46786.8	45637.8	38659.4	1.22549	0.00437033	0.0179284	2.5583	1.35519	up
Rfmb091	9S-Hydroxy-10E,12Z-octadecadienoic acid*		Lipids	Free fatty acids	C18H32O3	2	15514-85-9	839932	872394	891523	2.24734e+06	2.25202e+06	2.26355e+06	1.24427	2.83694e-05	0.001262	0.385019	-1.377	down
Wmjn000304	1-HydroxyialibinoA		Quinones	PhenAnthraquinones	C21H30O5	3	-	107487	62762	73410.4	17944.2	31657.2	24512.8	1.16219	0.0432847	0.0896051	3.28763	1.71705	up
Wahsn06866	Quercetin 3-O-(3''-Z-p-coumaroylarabinoside)*		Flavonoids	Flavonols	C29H24O13	1	-	29430.4	22996.1	27714.4	68586.1	72857.5	84087.2	1.2242	0.00372925	0.016038	0.355343	-1.49271	down
Wayn006761	Quercetin 5-O-p-coumaroyl rhamnoside		Flavonoids	Flavonols	C30H26O13	3	-	61457.9	48747.7	53924	142575	137995	153331	1.2309	0.000137479	0.00277908	0.378265	-1.40253	down
mws0918	Prunetin (5,4'-Dihydroxy-7-methoxyisoflavone)		Flavonoids	Isoflavones	C16H12O5	3	552-59-0	903319	788487	898088	7.55559e+06	7.58799e+06	8.05044e+06	1.24382	0.000292993	0.00419171	0.111662	-3.16279	down
MWS80006	9-Hydroperoxy-9Z,11E-Octadecadienoic Acid		Lipids	Free fatty acids	C18H32O4	2	-	93478.5	85209.9	94976.6	222651	185828	160563	1.19971	0.0290467	0.0662097	0.480923	-1.05612	down
Lmhn005110	Aracarpene 1		Flavonoids	Isoflavones	C16H12O6	3	1261245-78-6	457729	412138	419989	2.57268e+06	2.70908e+06	2.88719e+06	1.24351	0.00126278	0.00846523	0.157897	-2.66294	down
pme3514	Morin*		Flavonoids	Flavonols	C15H10O7	3	480-16-0	571254	581432	684999	1.29048e+06	1.35469e+06	1.37818e+06	1.23027	0.000157509	0.00300958	0.456754	-1.13051	down
Wbtn006715	1,2,4,5,8-pentahydroxy-6-methylanthracene-9,10-dione*		Flavonoids	Other Flavonoids	C15H10O7	3	-	571254	581432	684999	1.29048e+06	1.35469e+06	1.37818e+06	1.23027	0.000157509	0.00300958	0.456754	-1.13051	down
Ybnn006457	Artocarpanone		Flavonoids	Flavanones	C16H14O6	3	-	571254	581432	684999	1.29048e+06	1.35469e+06	1.37818e+06	1.23027	0.000157509	0.00300958	0.456754	-1.13051	down
[truncated: 340 more rows]
