# Supplementary material for: Revealing the key antioxidant compounds and potential action mechanisms of Pinus koraiensis pinecones by integrating UPLC-MS- based widely targeted metabolomics, network pharmacology, and molecular docking approaches
Source: Research Square preprint supplement (doi:10.21203/rs.3.rs-6712981/v1), 2025-06-25
Supplement: Supplementary file 6 [file b1c2be1fedee9b5c7863e32f.xlsx]

## Sheet: Sheet1
Metabolite profiles of Pinus koraiensis pinecones across three provenances.
Index	Compounds	Class I	Class II	Formula	Q1 (Da)	Q3 (Da)	Molecular weight (Da)	Ionization model	Level	CAS	cpd_ID	P-DL-1	P-DL-2	P-DL-3	P-LSH-1	P-LSH-2	P-LSH-3	P-DFH-1	P-DFH-2	P-DFH-3	kegg_map	mw_cpd_ID	mw_map
zjbp120812	Scutebarbolide C*	Terpenoids	Ditepenoids	C22H32O8	425.22	365.19	424.21	[M+H]+	3	-	-	372978	255523	282701	330615	316533	360403	453669	369552	405365	-	-	-
Wbsp013361	serratenediol	Terpenoids	Triterpene	C30H50O2	443.39	425.38	442.381	[M+H]+	3	2239-24-9	-	72337.5	78330.7	100262	54592.1	65999.2	69461.7	34819.9	38926.1	21938.6	-	-	-
zjzp121601	Kolavenol	Terpenoids	Ditepenoids	C20H34O	291.27	109.1	290.261	[M+H]+	1	19941-83-4	-	2.10825e+06	2.34716e+06	2.29698e+06	2.02224e+06	2.33645e+06	2.51766e+06	1.47439e+06	1.24497e+06	1.22648e+06	-	-	-
Zmcp102205	Spathulenol	Terpenoids	Sesquiterpenoids	C15H24O	221.19	119.09	220.183	[M+H]+	3	6750-60-3	-	1.18548e+06	1.13934e+06	1.54058e+06	1.08474e+06	1.10469e+06	1.0218e+06	1.57567e+06	1.13326e+06	760400	-	-	-
Wasdp05565	2,8-bis(hydroxymethyl)-4b,8-dimethyl-5,6,7,8a,9,10-hexahydrophenanthren-3-ol*	Terpenoids	Ditepenoids	C18H26O3	291.2	151.08	290.188	[M+H]+	3	-	-	179651	269691	273290	325678	281133	288869	232854	173879	190682	-	-	-
Lskp211333	14-Didehydrovouacapane-5a-ol	Terpenoids	Ditepenoids	C20H26O2	299.2	119.08	298.193	[M+H]+	3	-	-	1.24741e+07	9.61776e+06	1.24165e+07	8.67137e+06	1.01694e+07	9.90353e+06	4.99736e+06	5.59225e+06	6.28831e+06	-	-	-
Lazp007875	Fleuryinol A	Terpenoids	Ditepenoids	C20H30O4	335.22	191.14	334.214	[M+H]+	3	-	-	755537	777951	669067	979079	521819	677955	756834	908306	609788	-	-	-
Latp007842	4α-Hydroxy-1α,5αH-guaia-10(14),11(13)-dien-12,8α-olide	Terpenoids	Sesquiterpenoids	C16H22O3	263.16	145.1	262.156	[M+H]+	3	-	-	1.56549e+06	1.52364e+06	1.61252e+06	3.01955e+06	3.07988e+06	3.12155e+06	3.22302e+06	2.8224e+06	2.56023e+06	-	-	-
FQtp008495	13-Hydroxygermacrone*	Terpenoids	Sesquiterpenoids	C15H22O2	235.17	179.11	234.162	[M+H]+	1	-	C17491	2.26117e+06	2.41208e+06	2.35226e+06	2.07146e+06	2.11659e+06	2.23633e+06	2.68727e+06	2.64854e+06	2.53129e+06	-	C17491	-
Qmqp101722	Chloranthatone	Terpenoids	Sesquiterpenoids	C16H22O2	247.17	145.1	246.162	[M+H]+	3	-	-	5.59153e+06	5.6663e+06	6.20363e+06	4.52328e+06	4.96495e+06	4.8061e+06	5.03005e+06	4.40948e+06	4.63534e+06	-	-	-
Hmcp003852	Elemol	Terpenoids	Sesquiterpenoids	C15H26O	223.21	207.03	222.198	[M+H]+	3	639-99-6	-	8.05499e+07	8.68716e+07	8.74094e+07	1.05612e+08	7.96615e+07	1.06654e+08	1.16405e+08	1.15941e+08	1.22742e+08	-	-	-
Qmxp101615	Ent-3β-Acetoxyisopimar-15-8β-ol	Terpenoids	Ditepenoids	C22H36O3	349.27	179.14	348.266	[M+H]+	3	-	-	130942	99046.6	95214.2	130135	145212	139824	167959	93988.9	108874	-	-	-
Wbsp000362	serrat B	Terpenoids	Terpene	C30H48O7	521.35	521.35	520.34	[M+H]+	3	-	-	3.05658e+06	2.61251e+06	2.35529e+06	1.73093e+06	2.2997e+06	1.37654e+06	2.90202e+06	2.97957e+06	2.44025e+06	-	-	-
WaTKp16635	3-methyl-5-(1,5,5-trimethyl-7,8-dihydro-6H-naphthalen-2-yl)pent-1-en-3-ol	Terpenoids	Ditepenoids	C19H28O	273.22	161.13	272.214	[M+H]+	3	-	-	5.11614e+06	4.82703e+06	5.24341e+06	5.75562e+06	5.84556e+06	5.34293e+06	5.13129e+06	6.05954e+06	5.77778e+06	-	-	-
Lskp211360	8,9,11,14-Didehydrobouacapane-5α-ol	Terpenoids	Ditepenoids	C20H26O2	299.2	81.07	298.193	[M+H]+	3	-	-	1.27129e+07	1.32038e+07	1.39422e+07	1.28038e+07	1.23553e+07	1.20227e+07	8.84367e+06	9.05725e+06	9.08284e+06	-	-	-
Wadp008850	3-hydroxy-1-(hydroxymethyl)-1,7-dimethyl-7-vinyl-2,3,4,4a,4b,5,6,7-octahydrophenanthren-9(1H)-one	Terpenoids	Ditepenoids	C19H26O3	303.2	147.08	302.188	[M+H]+	3	-	-	3.27932e+07	3.18557e+07	2.96353e+07	2.2835e+07	1.97939e+07	2.27661e+07	2.47199e+07	2.30816e+07	2.41616e+07	-	-	-
Zjyp102938	Oxyphyllone C	Terpenoids	Sesquiterpenoids	C14H20O2	221.15	107.09	220.146	[M+H]+	3	-	-	1.35764e+06	1.08607e+06	1.16231e+06	1.09867e+06	1.1241e+06	870617	1.03617e+06	459130	546429	-	-	-
Zbkp008586	Levopimarinol	Terpenoids	Ditepenoids	C20H32O	289.25	149.13	288.245	[M+H]+	2	97640-46-5	C11883	1.73628e+07	1.52156e+07	1.71089e+07	1.76387e+07	1.62287e+07	1.94064e+07	9.56108e+06	1.55018e+07	1.30285e+07	ko00904,ko01110	C11883	-
Qmmp111802	15-Hydroxy-abieta-8,11,13-trien-3-one	Terpenoids	Ditepenoids	C20H28O2	301.22	153.09	300.209	[M+H]+	3	-	-	946507	1.0479e+06	1.22814e+06	1.01497e+06	1.14019e+06	1.30896e+06	1.13368e+06	1.03107e+06	1.08845e+06	-	-	-
Cmcp008329	Sandaracopimaric acid*	Terpenoids	Ditepenoids	C20H30O2	303.23	257.23	302.225	[M+H]+	3	471-74-9	-	6.53004e+06	5.02175e+06	7.72745e+06	4.92062e+06	4.62299e+06	4.40959e+06	4.32146e+06	5.31473e+06	3.90766e+06	-	-	-
Lmzp009438	Safrole	Terpenoids	Monoterpenoids	C10H10O2	163.08	57.07	162.068	[M+H]+	3	94-59-7	C10490	224397	197864	207437	277487	299091	309806	385097	309496	312046	-	C10490	-
Yajp011896	(3aS,8S,8aS)-5-(hydroxymethyl)-2,8-dimethyl-8-(4-methylpent-3-en-1-yl)-4-oxo-3,3a,4,7,8,8a-hexahydroazulene-1-carbaldehyde	Terpenoids	Monoterpenoids	C20H28O3	317.21	299.2	316.204	[M+H]+	3	-	-	1.07373e+07	9.39517e+06	9.0099e+06	7.49778e+06	8.71372e+06	6.34385e+06	7.75972e+06	7.53895e+06	1.01462e+07	-	-	-
Yalp008917	(3R,5R,7R,8R,10S,13S,17R)-17-((S)-7,7-dimethyl-2,3,6,7-tetrahydrooxepin-3-yl)-4,4,8,10,13-pentamethyl-2,3,4,5,6,7,8,9,10,11,12,13,16,17-tetradecahydro-1H-cyclopenta[a]phenanthrene-3,7-diyl diacetate	Terpenoids	Triterpene	C34H52O5	541.39	207.14	540.381	[M+H]+	3	-	-	137709	107463	97163.7	53467.2	55605.6	46722.4	40975.5	52955.8	35242.2	-	-	-
Qmmp111805	3β-Hydroxy-abieta-8,13-diene	Terpenoids	Ditepenoids	C20H32O	289.25	191.18	288.245	[M+H]+	3	-	-	2.5454e+06	2.44897e+06	2.7265e+06	2.74612e+06	2.28918e+06	2.91099e+06	1.55129e+06	1.86841e+06	1.71223e+06	-	-	-
Latp007436	Normelanothyrsin A*	Terpenoids	Sesquiterpenoids	C18H26O3	291.19	151.07	290.188	[M+H]+	3	-	-	205214	336462	221359	484686	262917	280811	168353	266597	252104	-	-	-
Lajp008319	6,12-dihydroxyabieta-5,8,11,13-tetraen-7-one	Terpenoids	Ditepenoids	C20H26O3	315.2	197.09	314.188	[M+H]+	3	-	-	918526	1.29125e+06	992818	762458	1.10241e+06	956591	1.3501e+06	1.25138e+06	1.39172e+06	-	-	-
MWSmce591	Curcumenol*	Terpenoids	Sesquiterpenoids	C15H22O2	235.17	105.07	234.162	[M+H]+	2	19431-84-6	C16942	448815	516070	396953	802128	851580	809640	1.00813e+06	1.11661e+06	1.06378e+06	-	C16942	-
HX1227	Selina-3,7(11)-dien-8-one	Terpenoids	Monoterpenoids	C15H22O	219.17	149.1	218.167	[M+H]+	3	-	-	830951	679897	612688	813848	774873	645568	640893	893543	1.0021e+06	-	-	-
Lhnp102928	10-Hydroxyligustroside	Terpenoids	Monoterpenoids	C25H32O13	541.19	137.06	540.184	[M+H]+	2	-	-	199536	178155	147520	280424	187764	164997	101440	101204	112243	-	-	-
Lmjp004816	Loliolide	Terpenoids	Monoterpenoids	C11H16O3	197.12	133.1	196.11	[M+H]+	3	5989-02-6	-	444256	398644	525738	591755	642429	506303	384460	583944	413922	-	-	-
MWSmce032	Isosteviol	Terpenoids	Ditepenoids	C20H30O3	319.22	273.22	318.219	[M+H]+	2	27975-19-5	-	4.39186e+07	4.5041e+07	4.78666e+07	3.59636e+07	3.66288e+07	3.40543e+07	4.11588e+07	3.9619e+07	3.95204e+07	-	-	-
Zjyp102907	8-hydroxy-1,4a-dimethyl-7-(prop-1-en-2-yl)-4,4a,5,6,7,8-hexahydronaphthalen-2(3H)-one*	Terpenoids	Sesquiterpenoids	C15H22O2	235.17	105.07	234.162	[M+H]+	2	-	-	287235	299321	370997	749617	726356	609588	768892	801275	1.06715e+06	-	-	-
Lmwp102013	Dehydrolindestrenolide	Terpenoids	Sesquiterpenoids	C15H16O2	229.12	173.13	228.115	[M+H]+	2	-	-	1.95182e+06	1.37415e+06	2.63849e+06	2.21022e+06	2.80536e+06	2.26943e+06	1.85071e+06	2.38683e+06	1.94168e+06	-	-	-
Lhnp111716	Deacylcynaropicrin	Terpenoids	Sesquiterpenoids	C15H18O4	263.13	165.07	262.12	[M+H]+	3	31565-50-1	-	564125	482746	560542	245244	594562	265318	334584	551173	282105	-	-	-
Qmdp112314	Vitexifolin C	Terpenoids	Ditepenoids	C20H28O	285.22	241.2	284.214	[M+H]+	3	-	-	6.21998e+06	6.29186e+06	6.53234e+06	1.0455e+07	1.19043e+07	1.12293e+07	5.45888e+06	6.45081e+06	6.7869e+06	-	-	-
Wbmp010530	15-Hydroxydehydroabietic acid	Terpenoids	Ditepenoids	C20H28O3	317.21	215.18	316.204	[M+H]+	3	54113-95-0	-	7.33025e+06	4.16873e+06	3.52139e+06	4.28973e+06	3.72616e+06	3.73033e+06	3.7467e+06	5.40225e+06	4.6343e+06	-	-	-
Sadp005403	2-((7-hydroxy-1,6-dimethyl-5-vinyl-9,10-dihydrophenanthren-2-yl)oxy)-6-(hydroxymethyl)tetrahydro-2H-pyran-3,4,5-triol	Terpenoids	Ditepenoids	C24H28O7	429.19	267.14	428.183	[M+H]+	3	-	-	525522	619454	384562	988683	649839	637561	458040	492604	471860	-	-	-
Wbmp010456	Macrophypene B	Terpenoids	Ditepenoids	C18H28O2	277.22	93.07	276.209	[M+H]+	3	-	-	3.93054e+06	3.30562e+06	3.822e+06	4.74127e+06	5.2544e+06	5.58616e+06	978657	959699	1.25084e+06	-	-	-
zjsp123102	Kravanhin B	Terpenoids	Ditepenoids	C20H28O3	317.21	105.17	316.204	[M+H]+	3	-	-	2.23922e+06	1.92708e+06	3.14803e+06	2.14778e+06	2.23395e+06	1.4669e+06	2.18271e+06	1.72063e+06	2.03834e+06	-	-	-
MWStz562	7-Oxodehydroabietic acid*	Terpenoids	Ditepenoids	C20H26O3	315.2	187.12	314.188	[M+H]+	1	18684-55-4	-	9.81385e+06	9.98761e+06	9.5895e+06	9.73226e+06	1.02713e+07	9.37506e+06	6.62315e+06	7.38362e+06	6.5097e+06	-	-	-
Sayp005824	Isocurcumenol*	Terpenoids	Sesquiterpenoids	C15H22O2	235.17	133.1	234.162	[M+H]+	1	24063-71-6	-	2.19317e+06	2.05485e+06	1.91272e+06	3.0851e+06	3.54772e+06	3.40444e+06	4.38363e+06	4.10899e+06	4.8887e+06	-	-	-
Qmyp101120	Procurcumenol*	Terpenoids	Sesquiterpenoids	C15H22O2	235.17	133.1	234.162	[M+H]+	1	21698-40-8	-	2.19317e+06	2.05485e+06	1.91272e+06	3.0851e+06	3.54772e+06	3.40444e+06	4.38363e+06	4.10899e+06	4.8887e+06	-	-	-
Wbsp000408	3β,14α,15α,21α-tetrahydroxyserrat-14-en-21-acetyl-3-(4'-hydroxybenzoate)	Terpenoids	Terpene	C39H58O7	639.43	639.43	638.418	[M+H]+	3	-	-	2.68632e+06	2.57453e+06	2.4533e+06	2.06168e+06	2.50128e+06	1.79302e+06	1.45223e+06	1.6686e+06	1.46712e+06	-	-	-
Wadp009670	2-Hydroxy-Pimara-5,15-dien-19-oic acid	Terpenoids	Ditepenoids	C20H30O3	319.23	149.1	318.219	[M+H]+	3	-	-	2.1439e+06	2.54102e+06	2.69345e+06	5.15198e+06	3.05288e+06	4.03349e+06	5.04434e+06	2.6493e+06	2.34174e+06	-	-	-
Lcmp122908	trans-communic acid*	Terpenoids	Ditepenoids	C20H30O2	303.23	257.23	302.225	[M+H]+	3	-	-	6.77916e+06	6.85285e+06	8.50684e+06	4.83478e+06	5.26334e+06	5.77147e+06	5.15195e+06	4.00672e+06	4.96067e+06	-	-	-
Wbmp010259	3-Hydroxyabieta-8,11,13-trien-7-one	Terpenoids	Ditepenoids	C20H28O2	301.22	255.21	300.209	[M+H]+	1	-	-	1.52853e+07	1.52606e+07	1.68642e+07	1.11506e+07	1.44015e+07	1.36477e+07	8.84128e+06	9.25931e+06	8.84497e+06	-	-	-
Lcmp122910	fokihodgin F	Terpenoids	Ditepenoids	C20H30O3	319.23	107.08	318.219	[M+H]+	3	-	-	1.56308e+06	2.31097e+06	3.41957e+06	1.98285e+06	2.76181e+06	3.59473e+06	2.17843e+06	2.29745e+06	2.78834e+06	-	-	-
Lmjp004581	Integracide H	Terpenoids	Triterpene	C36H54O7	599.4	337.21	598.387	[M+H]+	3	-	-	382673	465556	661807	401212	547353	422481	465588	690268	520385	-	-	-
Lhlp120611	Hydroxycarvone	Terpenoids	Monoterpenoids	C10H14O2	167.11	91.05	166.099	[M+H]+	3	-	-	692403	515751	981679	1.56268e+06	2.38938e+06	1.85974e+06	1.17137e+06	1.94301e+06	1.38499e+06	-	-	-
Zbkp004768	Schizonepetoside A	Terpenoids	Ditepenoids	C16H26O7	331.17	151.11	330.168	[M+H]+	3	-	C17634	4.4885e+06	4.4319e+06	4.66844e+06	4.24371e+06	4.51562e+06	4.80593e+06	4.0738e+06	4.41189e+06	4.52646e+06	-	C17634	-
Wasdp05532	5-hydroxy-4a-methyl-4,4a,5,6,7,8-hexahydronaphthalen-2(3h)-one	Terpenoids	Monoterpenoids	C11H16O2	181.12	107.09	180.115	[M+H]+	3	4242-00-6	-	911856	594630	504657	940365	951333	1.16143e+06	539403	386132	441735	-	-	-
Wadp009201	7-Oxoabietic acid*	Terpenoids	Ditepenoids	C20H28O3	317.21	147.08	316.204	[M+H]+	3	-	-	212909	235905	308508	193150	176032	193322	371130	294480	267412	-	-	-
MWSslk234	Aristolone	Terpenoids	Sesquiterpenoids	C15H22O	219.17	121.07	218.167	[M+H]+	2	25274-27-5	-	588257	643513	627709	825410	533875	971094	758581	814408	862191	-	-	-
Qayp009396	Solidagenone	Terpenoids	Ditepenoids	C20H28O3	317.21	119.09	316.204	[M+H]+	3	23534-56-7	-	2.15453e+07	2.43637e+07	2.55431e+07	1.37314e+07	1.33989e+07	1.32499e+07	2.83229e+07	2.23693e+07	2.09391e+07	-	-	-
Wadp011034	6,7-Dioxo-pimara-8,15-dien	Terpenoids	Ditepenoids	C20H28O2	301.22	149.1	300.209	[M+H]+	3	-	-	1.2691e+07	1.50567e+07	1.36452e+07	1.23964e+07	1.41238e+07	1.48242e+07	1.12984e+07	1.1327e+07	1.28162e+07	-	-	-
Wcop008499	15-oxo-ent-kaur-16-en-19-oic acid	Terpenoids	Ditepenoids	C20H28O3	317.21	159.12	316.204	[M+H]+	3	-	-	1.99245e+07	1.54884e+07	1.74576e+07	1.63027e+07	1.89589e+07	1.63686e+07	1.20617e+07	1.75551e+07	1.05526e+07	-	-	-
Wadp008171	2-Hydroxy-6,18-epoxypimara-8,15-dien-18-one	Terpenoids	Ditepenoids	C20H28O3	317.21	147.08	316.204	[M+H]+	3	-	-	4.92151e+07	6.02139e+07	5.50772e+07	6.08285e+07	5.87963e+07	6.22448e+07	4.28859e+07	3.43469e+07	3.34663e+07	-	-	-
Lhsp101904	polygodial*	Terpenoids	Sesquiterpenoids	C15H22O2	235.17	179.11	234.162	[M+H]+	1	6754-20-7	C09712	2.04267e+06	2.34542e+06	2.3254e+06	1.83143e+06	2.03015e+06	1.9025e+06	2.6683e+06	2.40435e+06	2.44857e+06	-	C09712	-
Sayp008460	phomophyllin A	Terpenoids	Sesquiterpenoids	C15H20O2	233.15	131.09	232.146	[M+H]+	3	-	-	5.21383e+06	3.54472e+06	3.84862e+06	2.2612e+06	2.41371e+06	2.46386e+06	4.11918e+06	3.77181e+06	3.40905e+06	-	-	-
Lskp211356	Taepeenin L	Terpenoids	Ditepenoids	C20H34O	291.27	121.1	290.261	[M+H]+	3	903560-19-0	-	2.09696e+06	2.05638e+06	2.06901e+06	2.22432e+06	2.16559e+06	2.18591e+06	1.25504e+06	1.57681e+06	1.14659e+06	-	-	-
WaTKp25754	Grandiflorenic acid	Terpenoids	Ditepenoids	C20H28O2	301.21	255.21	300.209	[M+H]+	3	22338-67-6	-	1.60314e+07	1.50348e+07	1.77747e+07	1.85964e+07	1.55521e+07	1.69513e+07	1.58208e+07	1.51695e+07	1.53912e+07	-	-	-
Wbsp000183	Phlegmanol B	Terpenoids	Terpene	C40H58O5	619.44	619.44	618.428	[M+H]+	2	-	-	3.34204e+07	6.06482e+07	6.40605e+07	4.64874e+07	7.78188e+07	5.02198e+07	2.41506e+07	4.19758e+07	2.31829e+07	-	-	-
mws1515	alpha-Ionone	Terpenoids	Monoterpenoids	C13H20O	193.16	175.15	192.151	[M+H]+	3	127-41-3	C12286	1.20398e+06	1.37439e+06	1.49211e+06	1.53121e+06	1.24847e+06	1.63805e+06	1.06359e+06	988269	1.11664e+06	-	C12286	-
Qmxp101524	11β-Hydroxy-8,15-isopimaradiene-3-one*	Terpenoids	Ditepenoids	C20H30O2	303.23	257.23	302.225	[M+H]+	2	-	-	4.4878e+06	4.32151e+06	4.82211e+06	9.9546e+06	7.4117e+06	7.48473e+06	1.37855e+07	1.4509e+07	1.13241e+07	-	-	-
MWStz399	Pinusolide	Terpenoids	Ditepenoids	C21H30O4	347.22	287.2	346.214	[M+H]+	1	31685-80-0	-	8.7231e+06	7.76126e+06	7.4102e+06	1.37124e+07	7.51132e+06	6.16e+06	9.96952e+06	8.63824e+06	8.86409e+06	-	-	-
Qmmp111815	3β-Hydroxy-9,10-epoxy-9,10-seco-abieta-8,11,13-triene*	Terpenoids	Ditepenoids	C20H30O2	303.23	191.18	302.225	[M+H]+	3	-	-	2.84809e+06	2.27063e+06	2.49798e+06	2.3062e+06	2.15825e+06	2.11957e+06	2.37508e+06	2.57715e+06	2.84461e+06	-	-	-
Lazp009337	Nagilactone F	Terpenoids	Ditepenoids	C20H26O3	315.2	241.12	314.188	[M+H]+	3	-	-	5.67878e+06	6.37816e+06	6.49384e+06	5.89157e+06	5.64006e+06	6.06188e+06	4.95064e+06	4.74251e+06	4.68304e+06	-	-	-
Lamp012938	(1R,3R,7E,11S,12R)-Dolabella-4(16),7,18-trien-3-ol	Terpenoids	Ditepenoids	C20H32O	289.25	121.1	288.245	[M+H]+	2	-	-	4.31611e+06	3.60841e+06	4.09016e+06	5.96482e+06	5.54624e+06	5.14759e+06	5.46621e+06	5.23049e+06	4.31318e+06	-	-	-
Sayp009177	vouacapenic acid	Terpenoids	Ditepenoids	C20H28O3	317.21	253.19	316.204	[M+H]+	3	-	-	1.56992e+06	1.13422e+06	1.48979e+06	590663	728923	738678	1.70067e+06	1.26752e+06	1.32286e+06	-	-	-
Lafp007563	Costal	Terpenoids	Sesquiterpenoids	C15H22O	219.17	121.1	218.167	[M+H]+	3	-	-	678421	584593	944502	670238	665803	700804	525570	532905	657320	-	-	-
Sayp010368	phyllanflexoid A*	Terpenoids	Ditepenoids	C20H26O3	315.19	187.11	314.188	[M+H]+	1	-	-	9.29828e+06	9.12923e+06	9.56104e+06	9.87786e+06	9.2256e+06	9.06468e+06	6.90346e+06	6.33648e+06	6.37098e+06	-	-	-
Wbsp011256	16-oxo-21β-hydroxyserrat-14-en-3α-yl acetate	Terpenoids	Triterpene	C30H48O3	457.37	457.37	456.36	[M+H]+	3	-	-	2.44333e+06	2.55756e+06	3.5812e+06	1.63791e+06	2.35194e+06	1.81615e+06	1.61558e+06	1.60887e+06	2.11425e+06	-	-	-
Qmmp111801	3α,15-Dihydroxy-18(4→3)-abeo-abieta-4(19),8,11,13-tetraene	Terpenoids	Ditepenoids	C20H28O2	301.22	163.15	300.209	[M+H]+	3	-	-	1.63812e+07	1.46851e+07	1.54123e+07	1.62012e+07	1.719e+07	1.64666e+07	2.13468e+07	1.80392e+07	1.67788e+07	-	-	-
Wadp008812	Momilactone C*	Terpenoids	Ditepenoids	C20H28O3	317.21	147.08	316.204	[M+H]+	3	62394-07-4	-	264769	232559	284032	215869	165745	167068	360483	261167	259121	-	-	-
Yalp009256	AMOORASTATIN	Terpenoids	Triterpene	C28H36O9	517.24	439.18	516.236	[M+H]+	3	-	-	86950.7	135489	92218.8	127633	134670	126722	84981.7	80038.4	114915	-	-	-
mws1626	Dehydrocostus lactone	Terpenoids	Sesquiterpenoids	C15H18O2	231.14	185.13	230.131	[M+H]+	3	477-43-0	C09387	3.72046e+06	3.64334e+06	3.60318e+06	5.18498e+06	7.75457e+06	5.04554e+06	6.32462e+06	4.6537e+06	4.55731e+06	-	C09387	-
Wbsp103327	(8R)-9-hydroxy-8-(hydroxymethyl)-6-methoxy-8-methylpyrano[2,3-f]chromen-2-one	Terpenoids	Terpene	C15H14O6	291.09	139.04	290.079	[M+H]+	3	-	-	1.54685e+07	1.54952e+07	1.52232e+07	1.87745e+07	1.98457e+07	1.71404e+07	1.52459e+07	1.62029e+07	1.81213e+07	-	-	-
Lajp008587	7-Oxo-13-epi-pimara-14,15-dien-18-oic acid	Terpenoids	Ditepenoids	C20H28O3	317.21	203.11	316.203	[M+H]+	3	-	-	2.76378e+06	2.05234e+06	2.58887e+06	2.1406e+06	1.97236e+06	1.8527e+06	1.91145e+06	1.68809e+06	1.96615e+06	-	-	-
Lajp008684	Dihydroxyabieta-5,8,11,13-tetraen-7-one	Terpenoids	Ditepenoids	C20H26O3	315.2	241.12	314.188	[M+H]+	3	-	-	6.41945e+06	5.97454e+06	6.2288e+06	4.61031e+06	5.35135e+06	4.8267e+06	5.03208e+06	3.98115e+06	4.13342e+06	-	-	-
Wbkp012886	(1S,3R,3a1S,8R,10S,11aS)-1,5,10-trihydroxy-3,3a1,8,11a-tetramethyl-2,11-dioxohexadecahydrodibenzo[de,g]chromen-4-yl acetate*	Terpenoids	Ditepenoids	C22H32O8	425.21	365.19	424.21	[M+H]+	3	-	-	311753	254723	363146	281249	298627	418237	456521	382070	375027	-	-	-
Lmqp010784	Progesterone	Terpenoids	Ditepenoids	C21H30O2	315.23	109.07	314.225	[M+H]+	2	57-83-0	C00410	2.0135e+06	1.33861e+06	2.00114e+06	7.60732e+06	8.07606e+06	5.85602e+06	2.04047e+06	2.19287e+06	2.25226e+06	ko01100	C00410	-
Zmlp009380	Jolkinolide D	Terpenoids	Ditepenoids	C20H28O3	317.21	123.12	316.204	[M+H]+	3	-	-	252905	312966	307257	128345	163140	124495	290024	206779	244486	-	-	-
Lmqp012453	3-Hydroxyurs-12-en-28-aldehyde (Ursolaldehyde)	Terpenoids	Triterpene	C30H48O2	441.37	191.18	440.365	[M+H]+	2	-	-	270036	144176	215577	423433	416956	301976	245257	229471	287541	-	-	-
MWSprf057	Nerolidol	Terpenoids	Sesquiterpenoids	C15H26O	223.2	81.07	222.198	[M+H]+	3	7212-44-4	C09704	300068	224886	232823	219153	255723	474471	194197	228514	222485	ko00909,ko01100	C09704	-
Sagp009249	nardostachone	Terpenoids	Sesquiterpenoids	C15H20O	217.16	119.08	216.151	[M+H]+	2	-	-	1.5441e+07	1.23957e+07	1.51853e+07	1.26274e+07	1.18708e+07	1.2966e+07	1.08219e+07	1.11683e+07	1.2818e+07	-	-	-
Wacyp08016	2,5,8-trimethyldeca-2,4,7-triene-1,10-diol	Terpenoids	Monoterpenoids	C13H22O2	228.2	95.09	210.162	[M+NH4]+	2	-	-	2.91126e+06	3.59271e+06	2.93442e+06	3.40548e+06	3.02161e+06	2.50559e+06	3.40757e+06	3.20843e+06	3.72157e+06	-	-	-
Lmmp004019	Ent-14β,16-epoxy-8-pimarene-3α,15–diol	Terpenoids	Ditepenoids	C20H32O3	321.24	135.12	320.235	[M+H]+	3	1188281-98-2	-	255881	318338	471145	449947	497486	354349	164297	227636	168220	-	-	-
Haxp011513	Sugiol*	Terpenoids	Ditepenoids	C20H28O2	301.22	259.17	300.209	[M+H]+	3	511-05-7	C21822	4.56837e+06	4.37669e+06	4.97538e+06	4.45395e+06	4.81518e+06	4.22807e+06	4.47394e+06	4.96821e+06	4.38522e+06	ko00904,ko01110	C21822	-
Lsjp211206	beta-Ionone	Terpenoids	Monoterpenoids	C13H20O	193.16	133.1	192.151	[M+H]+	2	79-77-6	C12287	1.1701e+06	1.33289e+06	1.86146e+06	1.25984e+06	1.83782e+06	1.66995e+06	1.30858e+06	1.79087e+06	1.61779e+06	-	C12287	-
Lazp009948	Suyiol*	Terpenoids	Ditepenoids	C20H28O2	301.22	259.17	300.208	[M+H]+	3	-	-	4.5448e+06	4.9264e+06	4.17213e+06	4.75177e+06	5.02124e+06	4.8659e+06	4.88434e+06	4.34126e+06	4.18296e+06	-	-	-
Wadp008782	7-Oxo-pimara-15-en-3,19-diol	Terpenoids	Ditepenoids	C20H32O3	321.24	149.1	320.235	[M+H]+	3	-	-	228516	213109	271857	506359	380214	742218	311804	360600	256638	-	-	-
HX1284	Dehydrololiolide	Terpenoids	Monoterpenoids	C11H14O3	195.1	107.05	194.094	[M+H]+	2	19355-58-9	-	766188	865046	867910	1.06632e+06	1.01899e+06	968211	985964	680728	763372	-	-	-
Wcop008480	2,5-dimethyl-2,3,3a,7a-tetrahydro-1H-indene-1,3-diol	Terpenoids	Sesquiterpenoids	C11H16O2	181.12	135.12	180.115	[M+H]+	3	-	-	431659	502928	328488	676003	617978	693835	399796	381070	313011	-	-	-
Lacp008280	Ent-rosa-5,15-dien-19-oic acid	Terpenoids	Ditepenoids	C20H30O2	303.23	125.06	302.224	[M+H]+	3	-	-	2.79475e+06	1.98253e+06	2.5827e+06	1.78527e+06	1.43829e+06	1.92e+06	1.70294e+06	1.55254e+06	1.86285e+06	-	-	-
pmp000162	Andrograpanin	Terpenoids	Ditepenoids	C20H30O3	319.23	301.22	318.219	[M+H]+	2	82209-74-3	-	2.99062e+07	3.79379e+07	8.78317e+07	3.2344e+07	5.39377e+07	3.44877e+07	2.36318e+07	5.01885e+07	2.6388e+07	-	-	-
Wbhp008887	13-(Hydroxymethyl)-5,9-dimethyl-14-oxotetracyclo[11.2.1.01,10.04,9]hexadecane-5-carbaldehyde	Terpenoids	Terpene	C20H30O3	319.23	301.22	318.219	[M+H]+	3	-	-	1.01767e+07	1.30379e+07	1.50005e+07	1.45195e+07	1.576e+07	1.56761e+07	1.56563e+07	1.02577e+07	1.04882e+07	-	-	-
Cmcp007926	Pinusolidic acid	Terpenoids	Ditepenoids	C20H28O4	333.21	287.2	332.199	[M+H]+	2	40433-82-7	-	3.80155e+07	2.65327e+07	4.4646e+07	5.02789e+07	5.03456e+07	2.57868e+07	2.8768e+07	4.46514e+07	3.61404e+07	-	-	-
MWSmce270	Rosmanol	Terpenoids	Ditepenoids	C20H26O5	347.18	231.1	346.178	[M+H]+	3	80225-53-2	-	958692	1.01754e+06	801120	465444	334888	294821	1.2152e+06	1.38726e+06	1.18899e+06	-	-	-
MWS1962	cis-Citral	Terpenoids	Monoterpenoids	C10H16O	153.13	83.05	152.12	[M+H]+	3	5392-40-5	C09847	468590	455921	414078	597693	645728	587523	512265	468860	467683	ko01110	C09847	-
Qmyp101338	JiangxiBaiyingsu I	Terpenoids	Sesquiterpenoids	C18H28O3	293.21	147.12	292.204	[M+H]+	3	-	-	1.5162e+07	1.3739e+07	1.38753e+07	9.91466e+06	9.32544e+06	1.06064e+07	1.10538e+07	9.75489e+06	1.04652e+07	-	-	-
zjzp121503	eupatorone	Terpenoids	Sesquiterpenoids	C16H20O4	277.14	173.1	276.136	[M+H]+	2	-	-	337005	386130	357971	234419	306213	261871	577303	440712	455075	-	-	-
Zjyp110109	oxyphyllone F	Terpenoids	Sesquiterpenoids	C11H16O2	181.12	121.1	180.115	[M+H]+	3	-	-	440904	509233	298818	837271	947552	1.04759e+06	618959	398770	457327	-	-	-
Wadp008483	7-Oxo-3-hydroxy-6,18-epoxypimara-15-en-18-one	Terpenoids	Ditepenoids	C20H28O4	333.21	149.1	332.199	[M+H]+	3	-	-	1.56197e+06	1.18244e+06	2.06547e+06	2.20337e+06	1.72662e+06	1.67421e+06	970678	1.09129e+06	2.06465e+06	-	-	-
Wbhp009515	Tagalsin Q	Terpenoids	Terpene	C18H26O2	275.2	275.2	274.193	[M+H]+	3	-	-	1.04236e+07	1.08222e+07	3.26107e+06	4.7756e+06	4.30837e+06	5.07778e+06	5.17105e+06	1.04804e+07	4.90058e+06	-	-	-
Qmyp101431	Amarantholidoside IV	Terpenoids	Sesquiterpenoids	C21H38O8	419.26	239.2	418.257	[M+H]+	3	-	-	401927	285940	288226	231340	223730	246350	189075	181892	147270	-	-	-
Qmjp081206	Isogermafurenolide*	Terpenoids	Sesquiterpenoids	C15H20O2	233.15	187.15	232.146	[M+H]+	2	-	-	1.05999e+06	925654	862182	1.34654e+06	1.36583e+06	1.30858e+06	1.67602e+06	1.35809e+06	956367	-	-	-
Smlp004629	nagilactone A	Terpenoids	Terpene	C19H24O6	349.16	349.16	348.157	[M+H]+	3	19891-50-0	-	6.32179e+06	6.3203e+06	6.60775e+06	6.81101e+06	6.53384e+06	6.7741e+06	4.38892e+06	4.2334e+06	4.43852e+06	-	-	-
Lhjp111615	Dimethylasperuloside	Terpenoids	Monoterpenoids	C20H26O11	443.15	147.04	442.147	[M+H]+	2	-	-	124656	155237	165668	217049	212104	173176	89907.4	124170	235264	-	-	-
Wasdp09220	2,3-Dehydro-4-oxo-beta-ionol	Terpenoids	Monoterpenoids	C13H18O2	207.14	93.07	206.131	[M+H]+	3	-	-	474584	594765	651268	353668	240817	401802	246009	158451	148482	-	-	-
Lsjp211260	9-epi-Blumenol B	Terpenoids	Monoterpenoids	C13H22O3	227.16	125.09	226.157	[M+H]+	3	-	-	136859	147167	178485	172740	211427	292695	175858	434190	155217	-	-	-
Hmbp002333	10-Dehydrogeniposide	Terpenoids	Monoterpenoids	C17H22O10	387.13	147.04	386.121	[M+H]+	3	-	-	59453.1	73358.7	79557.4	146342	139887	191740	95053.2	113045	73696	-	-	-
Lsjp211201	3S-3-hydroxy-β-damascon	Terpenoids	Monoterpenoids	C13H20O2	209.15	137.1	208.146	[M+H]+	2	-	-	282344	347876	437640	538985	457494	482906	572254	601381	688078	-	-	-
Lhsp101905	Actinidialactone	Terpenoids	Monoterpenoids	C10H14O2	167.11	93.07	166.099	[M+H]+	3	76729-80-1	-	5.73377e+06	4.93839e+06	5.32104e+06	1.18754e+07	1.1086e+07	1.1565e+07	5.0588e+06	6.235e+06	4.9047e+06	-	-	-
Lcmp123017	Dihydrohinokitiol	Terpenoids	Monoterpenoids	C10H14O2	167.11	79.05	166.099	[M+H]+	3	-	-	4.327e+06	3.90252e+06	4.43674e+06	7.42677e+06	5.95836e+06	7.58161e+06	3.22195e+06	3.95878e+06	3.31542e+06	-	-	-
Lmtp005328	Isoalantolactone	Terpenoids	Sesquiterpenoids	C15H20O2	233.15	119.08	232.146	[M+H]+	3	470-17-7	C09484	2.00772e+06	1.85448e+06	2.43061e+06	1.89576e+06	1.77717e+06	990548	2.15075e+06	2.20188e+06	2.46263e+06	-	C09484	-
Ljmp121505	Mansonone S	Terpenoids	Sesquiterpenoids	C15H18O3	247.13	187.11	246.126	[M+H]+	3	-	-	725841	727882	551073	1.67258e+06	1.60854e+06	1.97178e+06	1.44248e+06	1.52678e+06	1.5828e+06	-	-	-
Wadp007789	7-Oxo-2-hydroxy-Abieta-13-en-18-oic acid	Terpenoids	Ditepenoids	C20H30O4	335.22	149.1	334.214	[M+H]+	3	-	-	3.00219e+06	2.74497e+06	2.91491e+06	4.78089e+06	4.23962e+06	5.2882e+06	4.29066e+06	3.98674e+06	2.42216e+06	-	-	-
Qmxp101522	Hinokiol	Terpenoids	Ditepenoids	C20H30O2	303.23	119.09	302.225	[M+H]+	1	564-73-8	-	1.15791e+06	318477	1.05858e+06	787062	939686	868551	1.44709e+06	1.20926e+06	1.09523e+06	-	-	-
Zjyp102913	Isocyperol*	Terpenoids	Sesquiterpenoids	C15H24O	221.19	147.12	220.183	[M+H]+	1	20085-00-1	C16974	587790	428774	712120	443297	488082	356829	558294	333402	322839	-	C16974	-
Qmjp080607	Acoragermacrone	Terpenoids	Sesquiterpenoids	C15H24O	221.17	147.11	220.183	[M+H]+	3	50281-45-3	-	587790	428774	712120	443297	488082	356829	558294	333402	322839	-	-	-
Sadp005312	18-Hydroxyhugorosenone	Terpenoids	Ditepenoids	C20H30O3	319.23	131.09	318.219	[M+H]+	2	-	-	358821	383470	409766	273360	565136	333118	282452	256810	183335	-	-	-
Wadp008172	7-Oxo-pimara-8,15-dien-2,6,19-triol	Terpenoids	Ditepenoids	C20H30O4	335.22	147.08	334.214	[M+H]+	3	-	-	8.76533e+06	2.43868e+06	6.92011e+06	1.10756e+07	1.09398e+07	9.75153e+06	1.16936e+07	6.23405e+06	6.79475e+06	-	-	-
Lajp008349	15-Nor-14-oxolabda-8(17),12E-diene-18-oic acid	Terpenoids	Ditepenoids	C19H28O3	305.21	219.14	304.203	[M+H]+	3	-	-	185235	234216	157631	61642.2	185337	85962.3	120640	132586	181727	-	-	-
Zbkp010396	Palustradienal	Terpenoids	Terpene	C20H30O	287.24	133.1	286.23	[M+H]+	2	-	C18220	2.17813e+07	1.81624e+07	1.98196e+07	1.91873e+07	2.29272e+07	2.30867e+07	2.66103e+07	2.65358e+07	2.45442e+07	ko00904,ko01110	C18220	-
Lcmp123014	16-Hydroxyferruginol*	Terpenoids	Ditepenoids	C20H30O2	303.23	257.23	302.225	[M+H]+	2	-	-	7.6733e+06	4.33507e+06	7.11762e+06	7.89047e+06	5.95739e+06	6.68599e+06	1.31175e+07	1.22908e+07	9.77989e+06	-	-	-
Lhyp080413	Hispanone	Terpenoids	Ditepenoids	C20H28O2	301.22	81.03	300.209	[M+H]+	3	-	-	1.14576e+07	1.11452e+07	8.92571e+06	1.19772e+07	9.75075e+06	1.21183e+07	7.66993e+06	7.244e+06	5.8488e+06	-	-	-
Lmtp007747	Santalic acid*	Terpenoids	Sesquiterpenoids	C15H22O2	235.17	161.13	234.162	[M+H]+	3	73590-17-7	-	174619	316535	79996.6	735524	560593	621573	151640	178344	212194	-	-	-
Wacyp04721	Rhodioloside F	Terpenoids	Monoterpenoids	C21H36O11	482.26	153.13	464.226	[M+NH4]+	3	-	-	827513	1.43213e+06	1.07995e+06	1.55169e+06	378998	600568	148971	126995	152187	-	-	-
Lmqp003432	6,9-Dihydroxy-7-megastigmen-3-one	Terpenoids	Sesquiterpenoids	C13H22O3	227.16	121.1	226.157	[M+H]+	2	-	-	362906	252580	276429	312191	123579	300386	154914	180261	289307	-	-	-
Wadp008130	7-Oxo-3-hydroxypimaric acid	Terpenoids	Ditepenoids	C20H28O4	333.21	147.08	332.199	[M+H]+	3	-	-	3.00576e+06	3.10189e+06	2.01129e+06	2.69383e+06	2.59275e+06	3.75947e+06	754768	1.65681e+06	737080	-	-	-
WaTKp07197	3-Methyl-6-prop-1-en-2-ylcyclohex-3-en-1-ol	Terpenoids	Monoterpenoids	C10H16O	153.13	107.08	152.12	[M+H]+	3	20019-62-9	-	3.30976e+06	3.84789e+06	2.93085e+06	3.40142e+06	2.10644e+06	3.74546e+06	1.57926e+06	1.43747e+06	1.67013e+06	-	-	-
Sacp008354	epishyobunone	Terpenoids	Sesquiterpenoids	C15H24O	221.19	119.09	220.183	[M+H]+	3	39020-72-9	-	1.37216e+06	1.73836e+06	1.31335e+06	1.69786e+06	1.60886e+06	1.50357e+06	1.77167e+06	1.78429e+06	1.72726e+06	-	-	-
Zmlp009198	Jolkinolide E	Terpenoids	Ditepenoids	C20H28O2	301.22	119.08	300.209	[M+H]+	3	54494-34-7	-	557834	703794	697100	540917	561950	518091	576137	488383	575560	-	-	-
Zbkp001117	Bakankoside	Terpenoids	Ditepenoids	C16H23NO8	358.15	196.1	357.142	[M+H]+	1	1398-17-0	C09914	456411	296941	396499	279054	401089	428586	300426	242469	239898	-	C09914	-
MWStz410	3,7-Dioxolanosta-8,24-dien-26-oic acid (Ganoderic Acid DM)	Terpenoids	Triterpene	C30H44O4	469.33	469.34	468.324	[M+H]+	3	173075-45-1	-	1.63552e+06	2.87021e+06	1.80136e+06	2.35842e+06	1.82095e+06	2.7814e+06	1.75244e+06	1.58523e+06	1.29534e+06	-	-	-
Wadp007966	2-Hydroxy-6,18-epoxypimara-15-en-18-one	Terpenoids	Ditepenoids	C20H30O3	319.23	147.08	318.219	[M+H]+	3	-	-	7.9259e+06	8.63532e+06	9.5945e+06	7.27503e+06	5.26532e+06	5.91392e+06	4.80611e+06	5.40959e+06	6.18325e+06	-	-	-
Qmyp101114	9-O-β-D-Glucoside of 3-hydroxy-7,8-didehydro-β-ionol*	Terpenoids	Sesquiterpenoids	C19H30O7	371.21	209.15	370.199	[M+H]+	1	-	-	602344	606763	575631	949112	774165	762869	436241	564487	368388	-	-	-
Lafp004228	(6R,9R)-3-Oxo-α-ionol-β-D-glucoside*	Terpenoids	Sesquiterpenoids	C19H30O7	371.21	209.15	370.199	[M+H]+	1	-	-	602344	606763	575631	949112	774165	762869	436241	564487	368388	-	-	-
pmp000715	6-(2,3-Dihydroxybenzoyl)sweroside	Terpenoids	Monoterpenoids	C23H26O12	495.15	137.02	494.142	[M+H]+	2	-	-	486449	1.54806e+06	1.45049e+06	372604	408517	796079	949467	1.07862e+06	943283	-	-	-
Latp009929	6α,10α-Dihydroxy-1-oxoeremophila-7(11),8(9)-dien-12,8-olide	Terpenoids	Sesquiterpenoids	C15H18O5	279.12	149.02	278.115	[M+H]+	3	-	-	397544	479368	554252	253419	308885	278069	322086	416238	225774	-	-	-
Rp10476	Taxa-4(20),11-dien-5α-ol	Terpenoids	Ditepenoids	C20H32O	289.25	109.1	288.245	[M+H]+	2	178888-02-3	-	5.17695e+06	5.31114e+06	7.68143e+06	8.64811e+06	7.92501e+06	8.00177e+06	6.07318e+06	4.54143e+06	4.0076e+06	-	-	-
Lmqp003013	Citroside A	Terpenoids	Monoterpenoids	C19H30O8	387.2	149.1	386.194	[M+H]+	3	120330-44-1	-	112936	98857.6	126187	111329	93496	189617	88814.6	61775.3	56511.2	-	-	-
pmp000695	Swertiamarin	Terpenoids	Monoterpenoids	C16H22O10	375.13	177.05	374.121	[M+H]+	3	17388-39-5	C09800	280547	211163	280382	112721	202750	179647	164627	281463	206483	-	C09800	-
Qmxp101525	11β-Hydroxy-8,15-isopimaradiene-4-one	Terpenoids	Ditepenoids	C20H30O2	303.23	257.22	302.225	[M+H]+	1	-	-	7.64038e+06	7.06837e+06	9.61186e+06	9.97283e+06	9.27446e+06	9.89179e+06	5.61408e+06	5.86774e+06	6.1089e+06	-	-	-
Lmsp013238	3-Hydroxy-urs-11-en-28,13-lactone	Terpenoids	Triterpene	C30H46O3	455.35	301.22	454.345	[M+H]+	3	-	-	108010	175665	145601	232748	72099.3	143428	100514	122160	102341	-	-	-
Ljmp121501	Mansonone N	Terpenoids	Sesquiterpenoids	C16H22O4	279.16	149.02	278.152	[M+H]+	3	-	-	406354	733861	727314	284246	472722	290741	184078	133285	205983	-	-	-
Qmxp101533	Lophanthoidin	Terpenoids	Ditepenoids	C20H32O2	305.25	147.12	304.24	[M+H]+	1	-	-	800931	389933	640217	1.02311e+06	868041	829493	812270	421136	210357	-	-	-
Lmlp012282	Atractylone	Terpenoids	Sesquiterpenoids	C15H20O	217.16	159.12	216.151	[M+H]+	3	6989-21-5	C16919	409832	295479	333611	387098	253064	302381	405648	220671	276957	-	C16919	-
Wcop004647	6a-methyl-10-methylene-5,11-dioxododecahydro-9H-9,11a-methanonaphtho[1',2':1,7]cyclohepta[1,2-b]oxirene-3-carboxylic acid	Terpenoids	Ditepenoids	C19H22O5	331.15	151.08	330.147	[M+H]+	3	-	-	5.48431e+06	2.74506e+06	4.27268e+06	1.61997e+06	2.35433e+06	1.36474e+06	3.68305e+06	6.20319e+06	3.27263e+06	-	-	-
Wadp009668	7-Oxo-pimara-5,8,15-trien-2-ol	Terpenoids	Ditepenoids	C20H28O2	301.22	149.1	300.209	[M+H]+	3	-	-	1.71636e+07	2.02039e+07	2.08343e+07	3.27648e+07	3.10867e+07	3.09202e+07	2.00185e+07	1.86484e+07	1.66702e+07	-	-	-
Lhhp102907	Costunolide	Terpenoids	Sesquiterpenoids	C15H20O2	233.15	131.08	232.146	[M+H]+	3	553-21-9	C09382	1.17312e+06	461188	875836	956385	412629	537811	732489	329234	629805	ko00909,ko01110	C09382	-
Wasdp05826	Eutypellone A	Terpenoids	Ditepenoids	C20H30O4	335.22	147.08	334.214	[M+H]+	3	-	-	8.16184e+06	4.01296e+06	6.23909e+06	1.67809e+07	9.23587e+06	9.16867e+06	8.79494e+06	5.66286e+06	7.38781e+06	-	-	-
Cmlp002967	Gentiolactone	Terpenoids	Monoterpenoids	C10H12O5	213.07	149.06	212.069	[M+H]+	3	-	-	234521	273544	336990	326842	452820	432785	436922	472449	474911	-	-	-
Lajp006846	Imbricatusol D	Terpenoids	Ditepenoids	C20H30O3	319.23	255.21	318.219	[M+H]+	1	-	-	4.3257e+07	4.03435e+07	3.92788e+07	4.00718e+07	3.54427e+07	3.04342e+07	2.70858e+07	2.76761e+07	3.12368e+07	-	-	-
Latp005978	1β,4β,4α,5β-Diepoxy-10α,11αH-xantha-12,8β-olide	Terpenoids	Sesquiterpenoids	C15H22O4	267.16	185.13	266.151	[M+H]+	2	-	-	1.0985e+06	831381	1.22516e+06	972071	480661	945205	1.40207e+06	991280	1.49652e+06	-	-	-
Lhlp111209	Cupressic acid	Terpenoids	Ditepenoids	C20H32O3	321.24	147.12	320.235	[M+H]+	1	1909-90-6	-	704338	666066	643497	1.07599e+06	1.34003e+06	891726	680001	361585	527885	-	-	-
Lajp007436	Imbricasin A*	Terpenoids	Ditepenoids	C20H30O3	319.23	149.1	318.219	[M+H]+	3	-	-	2.20448e+06	3.37683e+06	2.80332e+06	140075	140075	140075	2.27725e+06	2.12355e+06	2.1675e+06	-	-	-
Sacp008038	acorenone*	Terpenoids	Sesquiterpenoids	C15H24O	221.19	147.12	220.183	[M+H]+	1	5956-05-8	-	896205	1.2203e+06	1.11158e+06	493082	600839	608899	98616.3	98616.3	98616.3	-	-	-
Qmdp112301	Viterofolin C	Terpenoids	Ditepenoids	C20H32O2	305.25	161.13	304.24	[M+H]+	3	-	-	682778	462294	703484	423583	420295	329485	53470.9	53470.9	53470.9	-	-	-
Lmjp007881	Artemisinate*	Terpenoids	Sesquiterpenoids	C15H22O2	235.17	161.14	234.162	[M+H]+	3	80286-58-4	C20309	214697	220704	185770	696162	757189	557828	37154	37154	37154	-	C20309	-
Lmtp005226	Santalol	Terpenoids	Sesquiterpenoids	C15H24O	221.19	105.07	220.183	[M+H]+	3	11031-45-1	-	873799	914820	966148	624463	505242	279072	55814.4	55814.4	55814.4	-	-	-
Lhgp102103	Labda-8(17),12-diene-15-ol-16-al	Terpenoids	Ditepenoids	C20H32O2	305.25	191.18	304.24	[M+H]+	2	-	-	385057	332149	300701	174128	272191	267333	17937	17937	17937	-	-	-
Qayp009909	Kolavenic Acid	Terpenoids	Ditepenoids	C20H32O2	305.25	95.08	304.24	[M+H]+	3	25436-90-2	-	1.13185e+06	805550	1.1071e+06	617247	713040	586423	67216.2	67216.2	67216.2	-	-	-
Lskp211392	Libocedrine B	Terpenoids	Sesquiterpenoids	C15H22O	219.17	145.1	218.167	[M+H]+	3	-	-	1.02649e+06	1.2698e+06	1.27189e+06	1.36787e+06	1.35227e+06	1.11646e+06	877674	1.45646e+06	1.65112e+06	-	-	-
Hmmp003004	Vogeloside	Terpenoids	Monoterpenoids	C17H24O10	389.14	149.06	388.137	[M+H]+	2	60077-47-6	-	130553	56342.9	141233	140279	162549	128453	39606.4	104204	86114.3	-	-	-
Wbmp009265	Callilongisin A*	Terpenoids	Ditepenoids	C20H30O4	335.22	271.2	334.214	[M+H]+	3	-	-	2.60921e+06	1.26747e+06	2.1047e+06	2.43857e+06	1.6659e+06	3.07133e+06	1.70401e+06	1.18919e+06	1.68294e+06	-	-	-
Qmjp080407	14(15)-Bisnor-13-oxolabd-8(17),11(E)-dien-19-oic acid	Terpenoids	Sesquiterpenoids	C18H26O3	291.19	233.16	290.188	[M+H]+	3	-	-	18678.9	18678.9	18678.9	238866	196110	195102	289570	253507	397241	-	-	-
Lmyp004084	Perillyl alcohol*	Terpenoids	Monoterpenoids	C10H16O	153.13	107.09	152.12	[M+H]+	1	57717-97-2	C22272	1.73784e+06	2.45318e+06	1.99779e+06	2.53268e+06	1.74019e+06	2.07968e+06	579946	923597	994833	-	C22272	-
Jmcp004706	pterodontoside E	Terpenoids	Sesquiterpenoids	C21H38O8	419.26	135.11	418.257	[M+H]+	3	-	-	115158	91530.7	121120	11128.6	11128.6	11128.6	55643.2	124767	58740.7	-	-	-
Lhhp120801	illicinolide A	Terpenoids	Sesquiterpenoids	C16H24O8	345.16	137.09	344.147	[M+H]+	3	-	-	1.38775e+06	1.54086e+06	1.80513e+06	853794	725984	1.52271e+06	875172	1.125e+06	866129	-	-	-
Qmdp112512	Isolophanthin A*	Terpenoids	Ditepenoids	C20H30O2	303.23	191.18	302.225	[M+H]+	3	-	-	2.45189e+06	2.04798e+06	2.24943e+06	2.05117e+06	2.1344e+06	2.39463e+06	2.16832e+06	2.45982e+06	2.33551e+06	-	-	-
Cmyp003257	Icariside B1	Terpenoids	Sesquiterpenoids	C19H30O8	387.2	225.14	386.194	[M+H]+	3	109062-00-2	-	511957	430584	774746	539580	2.78396e+06	545686	878570	865480	289025	-	-	-
Sadp004383	2-((7-hydroxy-3,8-dimethyl-4-vinyl-9,10-dihydrophenanthren-2-yl)oxy)-6-(hydroxymethyl)tetrahydro-2H-pyran-3,4,5-triol	Terpenoids	Ditepenoids	C24H28O7	429.19	267.14	428.183	[M+H]+	3	-	-	336708	518901	1.17962e+06	684675	207445	571423	421226	176440	365694	-	-	-
Zbkp010245	Neoabietal	Terpenoids	Terpene	C20H30O	287.24	123.12	286.23	[M+H]+	1	19898-57-8	C11885	17504.1	12078.4	118117	55716.1	89384.9	60919.9	52847	24770	29328.6	ko00904,ko01110	C11885	-
zjbp111620	12,15-dioxo-selina-4,11-dine	Terpenoids	Sesquiterpenoids	C15H20O2	233.15	145.1	232.146	[M+H]+	3	-	-	253268	785681	450009	689837	863194	742723	977719	821192	740833	-	-	-
Wacyp06174	2,7-Dimethylocta-2,4-Dienal-8-ol 8-O-(beta-D-Xylopyranosyl)-beta-D-glucopyranoside	Terpenoids	Monoterpenoids	C21H34O11	480.25	151.11	462.21	[M+NH4]+	1	-	-	329370	410435	322968	167342	233303	209621	255697	277148	276560	-	-	-
MWSHC2083	1,6-Dihydroxy-4(14)-eudesmene	Terpenoids	Sesquiterpenoids	C15H26O2	239.2	105.07	238.193	[M+H]+	3	70389-88-7	-	158613	78243.1	262694	15648.6	15648.6	15648.6	147624	204846	98693.4	-	-	-
HX1223	Germacra-1(10),4,7(11)-trien-9α-ol	Terpenoids	Monoterpenoids	C15H24O	221.19	105.07	220.183	[M+H]+	1	-	-	1.93427e+06	1.34782e+06	2.19044e+06	1.68784e+06	1.47225e+06	1.91852e+06	1.94247e+06	1.71771e+06	1.74627e+06	-	-	-
Yalp016143	(13alpha,17R)-21,23-Epoxy-4,4,8-trimethyl-24-nor-5alpha-chola-14,20,22-triene-1alpha,3alpha,7alpha-triol 1,7-diacetate	Terpenoids	Triterpene	C30H42O6	499.3	147.04	498.298	[M+H]+	3	-	-	34571.1	34508.6	16428.2	48862.8	33114.8	57985.5	29254.1	42679.1	55184.2	-	-	-
MWSmce679	Caryophyllene epoxide	Terpenoids	Sesquiterpenoids	C15H24O	221.19	147.12	220.183	[M+H]+	1	1139-30-6	C16908	2.24182e+06	3.42106e+06	2.15187e+06	2.35563e+06	2.29626e+06	2.42554e+06	2.33244e+06	2.46749e+06	2.12292e+06	-	C16908	-
Wbsp009547	3α,21β,24-trihydroxyserrat-14-en-16-one	Terpenoids	Triterpene	C30H48O4	473.36	473.36	472.355	[M+H]+	3	-	-	2.5386e+06	5.32261e+06	5.59079e+06	7.84031e+06	3.74126e+06	7.16031e+06	2.73357e+06	2.80182e+06	3.0637e+06	-	-	-
Lacp005171	3-(3'-Hydroxybutyl)-2,4,4-trimethylcyclohexa-2,5-dienone glucoside	Terpenoids	Sesquiterpenoids	C19H30O7	371.21	133.1	370.199	[M+H]+	1	-	-	26703.5	159614	290338	50005.9	119388	58680.4	5340.71	5340.71	5340.71	-	-	-
Wadp010789	Dehydro-4-Epiabietal	Terpenoids	Ditepenoids	C20H28O	285.22	133.1	284.214	[M+H]+	3	24035-50-5	-	1.69607e+07	1.68121e+07	1.82685e+07	2.7298e+07	2.89957e+07	2.65391e+07	1.65382e+07	1.67716e+07	1.63468e+07	-	-	-
Sacp008256	isoshyobunone*	Terpenoids	Sesquiterpenoids	C15H24O	221.19	147.12	220.183	[M+H]+	1	21698-46-4	-	1.06686e+06	1.13138e+06	1.18504e+06	598396	628232	570541	114108	114108	114108	-	-	-
zjbp111632	14-hydroxy-α-humulene*	Terpenoids	Sesquiterpenoids	C15H24O	221.19	147.12	220.183	[M+H]+	1	-	-	1.06686e+06	1.13138e+06	1.18504e+06	598396	628232	570541	114108	114108	114108	-	-	-
HX1305	12,13-Dehydrogeranylgeraniol	Terpenoids	Monoterpenoids	C20H32O	289.25	135.12	288.245	[M+H]+	2	352274-18-1	-	1.58455e+06	2.70222e+06	2.29543e+06	2.5694e+06	2.08298e+06	1.04961e+06	150857	150857	150857	-	-	-
Latp007327	Carpesia lactone	Terpenoids	Sesquiterpenoids	C15H20O3	249.15	145.1	248.141	[M+H]+	3	-	-	176968	248196	149715	293595	267247	243791	199901	205498	247495	-	-	-
Lmjp009734	Glechomanolide*	Terpenoids	Sesquiterpenoids	C15H20O2	233.15	131.09	232.146	[M+H]+	3	38146-68-8	C09466	952199	515875	947081	928169	1.05735e+06	530388	817081	956362	708561	-	C09466	-
Lacp010598	Kaur-16-en-19-al	Terpenoids	Ditepenoids	C20H30O	287.24	159.12	286.229	[M+H]+	3	-	-	2.33515e+06	1.40941e+06	1.68668e+06	2.17562e+06	4.91458e+06	2.64033e+06	1.29376e+06	1.8365e+06	2.13412e+06	-	-	-
Qmyp081709	Leoheteronin C	Terpenoids	Ditepenoids	C20H28O4	333.21	159.11	332.199	[M+H]+	3	-	-	547653	816238	1.03367e+06	598526	590664	613806	349354	386431	720364	-	-	-
Wadp007734	7-Oxo-2-hydroxy-6,18-epoxypimara-15-en-18-one	Terpenoids	Ditepenoids	C20H28O4	333.21	149.1	332.199	[M+H]+	3	-	-	4.02792e+06	3.6657e+06	3.47484e+06	99970	99970	99970	3.50151e+06	2.82075e+06	2.65401e+06	-	-	-
Smmp008919	Epirosmanol	Terpenoids	Ditepenoids	C20H26O5	347.18	301.18	346.178	[M+H]+	3	-	-	3.03384e+06	2.57693e+06	2.62343e+06	515385	515385	515385	3.73132e+06	3.67859e+06	3.58574e+06	-	-	-
Lmcp006589	Shizukanolide A	Terpenoids	Sesquiterpenoids	C15H18O2	231.14	185.13	230.131	[M+H]+	3	70578-36-8	-	3.62666e+06	4.59889e+06	4.58996e+06	3.60906e+06	4.46646e+06	3.33725e+06	3.29329e+06	1.98218e+06	2.96161e+06	-	-	-
Lazp010816	Fleuryinol B	Terpenoids	Ditepenoids	C20H30O2	303.23	171.12	302.224	[M+H]+	3	-	-	64759.5	64759.5	64759.5	637114	626169	623738	350511	534443	323798	-	-	-
Qmmp111807	3α-Hydroxy-9α,13α-epidioxy-18(4→3)-abeo-abieta-4(19),8(14)-diene	Terpenoids	Ditepenoids	C20H30O3	319.23	191.18	318.219	[M+H]+	3	-	-	3.39676e+06	3.8518e+06	3.38715e+06	2.83936e+06	3.30459e+06	2.62621e+06	2.80484e+06	3.38333e+06	2.53639e+06	-	-	-
Labp003707	Glucosyl corchoionoside C	Terpenoids	Monoterpenoids	C25H40O13	549.25	207.14	548.247	[M+H]+	3	-	-	67490.5	65488.7	27927.5	51051.2	19036.3	47485.5	3807.26	3807.26	3807.26	-	-	-
Lskp211321	Caesaldkarin b	Terpenoids	Ditepenoids	C20H30O3	319.23	81.07	318.219	[M+H]+	3	-	-	2.96058e+06	3.24092e+06	3.18109e+06	2.6701e+06	2.49647e+06	2.54854e+06	2.67631e+06	2.77883e+06	2.56416e+06	-	-	-
Wbmp011024	Caryophyllenol II	Terpenoids	Sesquiterpenoids	C15H24O	221.19	203.18	220.183	[M+H]+	3	32214-89-4	-	2.32568e+06	1.60732e+06	2.04323e+06	1.50649e+06	1.8397e+06	1.99207e+06	1.61555e+06	1.80848e+06	1.76251e+06	-	-	-
Qmxp101531	Inflexarabdonin J*	Terpenoids	Ditepenoids	C20H30O3	319.23	149.1	318.219	[M+H]+	3	-	-	2.43312e+06	1.821e+06	2.35826e+06	227012	227012	227012	2.37478e+06	1.86828e+06	2.2528e+06	-	-	-
Sajp005331	Ptaquiloside Z	Terpenoids	Sesquiterpenoids	C21H32O8	413.22	251.16	412.21	[M+H]+	3	-	-	716366	847216	637507	1.6548e+06	1.18099e+06	1.06914e+06	996833	706319	806208	-	-	-
Zadp004927	12-O-methylspruceanone	Terpenoids	Ditepenoids	C20H28O2	301.22	301.22	300.209	[M+H]+	3	-	-	5.51768e+07	6.37427e+07	6.54449e+07	2.43603e+08	2.73358e+08	7.43066e+07	4.28181e+07	4.31462e+07	4.34174e+07	-	-	-
Sadp007464	5-(hydroxymethyl)-7-methoxy-1,8-dimethyl-9,10-dihydrophenanthren-2-ol	Terpenoids	Ditepenoids	C18H20O3	285.15	239.14	284.141	[M+H]+	3	-	-	241252	241252	241252	241252	241252	241252	1.29094e+06	1.53066e+06	1.20626e+06	-	-	-
Wbmp003788	3,4-Dihydroxy-7,8-dihydro-β-ionone-4-O-β-D-glucoside*	Terpenoids	Sesquiterpenoids	C19H32O8	389.22	209.15	388.21	[M+H]+	1	-	-	84443.6	169610	142498	409945	354627	267043	209273	212688	142280	-	-	-
mws1565	Geniposide	Terpenoids	Monoterpenoids	C17H24O10	389.14	209.08	388.137	[M+H]+	3	24512-63-8	C09781	84443.6	169610	142498	409945	354627	267043	209273	212688	142280	-	C09781	-
Wbmp003419	Dihydrovomifoliol-O-β-D-glucoside*	Terpenoids	Sesquiterpenoids	C19H32O8	389.22	209.15	388.21	[M+H]+	1	-	-	84443.6	169610	142498	409945	354627	267043	209273	212688	142280	-	-	-
Yajp004597	Grasshopper Ketone	Terpenoids	Monoterpenoids	C13H20O3	225.15	119.09	224.141	[M+H]+	3	-	-	590814	729992	528804	1.25135e+06	629705	611526	105761	105761	105761	-	-	-
Sahp003947	Staphylionoside A	Terpenoids	Sesquiterpenoids	C19H30O8	387.2	207.14	386.194	[M+H]+	3	-	-	493700	570874	684472	41259.7	41259.7	41259.7	235042	206298	322199	-	-	-
Sazp010564	6-methoxy-1,1,4a,7-tetramethyl-2,3,4,10a-tetrahydrophenanthren-2-ol	Terpenoids	Ditepenoids	C19H26O2	287.2	227.18	286.193	[M+H]+	3	-	-	1.46219e+07	1.56306e+07	1.41635e+07	4.56925e+07	4.18644e+07	4.45951e+07	2.19525e+07	2.11686e+07	2.2251e+07	-	-	-
Qmdp112509	Abietatrien-3β-ol	Terpenoids	Ditepenoids	C20H30O	287.24	171.12	286.23	[M+H]+	3	-	-	1.62356e+07	1.6234e+07	1.63838e+07	4.37831e+07	4.27729e+07	4.56597e+07	2.13845e+07	2.20264e+07	2.11072e+07	-	-	-
MWSprf105	Kahweol	Terpenoids	Terpene	C20H26O3	315.2	145.06	314.188	[M+H]+	1	6894-43-5	-	2.90319e+07	2.78694e+07	2.92284e+07	2.73797e+07	2.75576e+07	2.70001e+07	2.34099e+07	2.28641e+07	2.5424e+07	-	-	-
zjbp111627	baimuxifuranic acid	Terpenoids	Sesquiterpenoids	C15H24O3	253.18	159.12	252.173	[M+H]+	3	-	-	810153	611286	579532	534984	995671	764818	22741	22741	22741	-	-	-
MWSCX022	Polylauioid I	Terpenoids	Ditepenoids	C20H28O5	349.2	285.19	348.194	[M+H]+	3	-	-	134986	134986	134986	758215	850662	674928	134986	134986	134986	-	-	-
Zjyp102916	(1R,4aR,7R,8aR)-1,4a,8a-trimethyl-7-(prop-1-en-2-yl)-deca-hydronaphthalen-1-ol	Terpenoids	Sesquiterpenoids	C15H24O	221.19	105.07	220.183	[M+H]+	1	-	-	579983	734907	658497	456112	354621	425085	70924.3	70924.3	70924.3	-	-	-
Sacp008545	shyobunone*	Terpenoids	Sesquiterpenoids	C15H24O	221.19	147.12	220.183	[M+H]+	1	21698-44-2	-	695833	695487	604401	602767	567550	460363	458576	559355	410985	-	-	-
Hmyp008730	Oxyphyllol A*	Terpenoids	Sesquiterpenoids	C15H24O	221.19	147.12	220.183	[M+H]+	1	-	-	695833	695487	604401	602767	567550	460363	458576	559355	410985	-	-	-
Lhfp110801	Ligularone	Terpenoids	Sesquiterpenoids	C15H20O2	233.15	105.07	232.146	[M+H]+	3	4234-94-0	-	84402.7	84402.7	84402.7	557630	607671	661637	84402.7	84402.7	84402.7	-	-	-
Lsjp211202	(6S,9R)-Vomifoliol; (6S,9R)-6-Hydroxy-3-oxo-alpha-ionol	Terpenoids	Monoterpenoids	C13H20O3	225.15	123.08	224.141	[M+H]+	3	23526-45-6	C01760	232822	245256	271618	265009	46564.4	672601	257885	477099	670716	-	C01760	-
MWSHC2042	(2E)-3-(1-Hydroxy-2,6,6-trimethyl-4-oxo-2-cyclohexen-1-yl)-2-propenoic acid	Terpenoids	Sesquiterpenoids	C12H16O4	225.11	123.04	224.105	[M+H]+	3	26690-86-8	-	232822	245256	271618	265009	46564.4	672601	257885	477099	670716	-	-	-
Wadp009564	7-Oxopimaric acid	Terpenoids	Ditepenoids	C20H28O3	317.21	147.08	316.204	[M+H]+	3	-	-	102581	98844.9	37669.9	72174.4	91870.9	75446	125804	91892.9	93900.7	-	-	-
Lkmp122714	Sonchuionoside A	Terpenoids	Sesquiterpenoids	C19H30O8	387.2	167.1	386.194	[M+H]+	3	-	-	21362.2	71882.2	38587.3	39110.6	48627.5	68492.2	4075.63	4075.63	4075.63	-	-	-
Yalp012806	Neocembrene	Terpenoids	Ditepenoids	C20H32	273.26	109.1	272.25	[M+H]+	3	31570-39-5	C09140	395427	395427	395427	1.97713e+06	2.41428e+06	2.07892e+06	395427	395427	395427	-	C09140	-
pmp000436	Taraxerol	Terpenoids	Triterpene	C30H50O	427.39	409.38	426.386	[M+H]+	3	127-22-0	C08637	116976	88873.8	222308	15352	15352	15352	235939	76759.9	119611	ko00909,ko01110	C08637	-
MWSmce253	Ergolide	Terpenoids	Sesquiterpenoids	C17H22O5	307.15	229.12	306.147	[M+H]+	3	54999-07-4	-	4.07434e+06	4.28123e+06	4.03579e+06	5.22256e+06	4.39517e+06	5.04649e+06	4.53755e+06	4.80814e+06	4.92431e+06	-	-	-
Wcop008957	geopyxin B	Terpenoids	Ditepenoids	C20H28O4	333.2	297.18	332.199	[M+H]+	3	-	-	4.99758e+06	4.37927e+06	4.93732e+06	134473	134473	134473	4.76976e+06	2.93607e+06	4.17489e+06	-	-	-
Hmyp009288	Epinootkatol	Terpenoids	Sesquiterpenoids	C15H24O	221.18	163.15	220.183	[M+H]+	3	-	-	237108	228908	119312	99974.1	69347.1	133235	13869.4	13869.4	13869.4	-	-	-
Lhmp112604	Vitexilactone	Terpenoids	Ditepenoids	C22H34O5	379.25	301.21	378.241	[M+H]+	3	61263-49-8	-	33623.9	53486.9	28090	103830	53795.3	65040.3	5617.99	5617.99	5617.99	-	-	-
Wadp008871	19-Oxo-pimara-8,11,15-trien-2-ol	Terpenoids	Ditepenoids	C20H28O2	301.21	121.1	300.209	[M+H]+	3	-	-	963718	1.3142e+06	1.20571e+06	981092	593007	915542	741456	779556	828638	-	-	-
Lhpp101822	Veronicoside	Terpenoids	Monoterpenoids	C22H26O11	467.15	165.05	466.147	[M+H]+	3	50981-09-4	-	56096.8	56095.8	60923.9	11219.2	11219.2	11219.2	11219.2	11219.2	11219.2	-	-	-
Sayp007217	caesaldekarin B	Terpenoids	Ditepenoids	C20H30O3	319.23	221.16	318.219	[M+H]+	3	-	-	197139	272289	150215	208519	113774	111663	22332.7	22332.7	22332.7	-	-	-
Sayp005415	Neocurdione	Terpenoids	Sesquiterpenoids	C15H24O2	237.18	163.11	236.178	[M+H]+	3	108944-67-8	-	77868.8	70123	46915	8565.57	8565.57	8565.57	8565.57	8565.57	8565.57	-	-	-
Lazp002953	Nagilactone C diglucoside	Terpenoids	Ditepenoids	C31H42O17	687.25	363.14	686.242	[M+H]+	3	-	-	13426.4	28878.3	8871	1774.2	1774.2	1774.2	9236.7	21197.5	26161	-	-	-
Wcfp003211	1,1'-(6-hydroxy-2,3-dihydro-1H-indene-2,5-diyl)bis(ethan-1-one)	Terpenoids	Sesquiterpenoids	C13H14O3	219.1	189.09	218.094	[M+H]+	3	-	-	1.02619e+06	1.35632e+06	978122	1.95124e+06	2.125e+06	2.10453e+06	195547	195547	195547	-	-	-
Sayp008439	caesalpinin ML	Terpenoids	Ditepenoids	C20H32O2	305.24	241.2	304.24	[M+H]+	3	-	-	16304.9	16304.9	16304.9	16304.9	16304.9	16304.9	384577	81524.6	234400	-	-	-
Zjyp102917	Nootkatol	Terpenoids	Sesquiterpenoids	C15H24O	221.19	119.08	220.183	[M+H]+	1	50763-67-2	C17915	896726	2.26365e+06	2.25168e+06	2.37504e+06	2.58406e+06	1.6272e+06	2.33952e+06	2.09214e+06	2.48254e+06	-	C17915	-
Zjyp110101	Nootkatone	Terpenoids	Sesquiterpenoids	C15H22O	219.17	121.07	218.167	[M+H]+	1	4674-50-4	C17914	2.99118e+06	2.70545e+06	3.00014e+06	780836	747655	869475	815518	777401	755097	-	C17914	-
Qmyp101402	11,12-O-Isopropyfidenesolajiangxin F	Terpenoids	Sesquiterpenoids	C18H28O3	293.21	107.09	292.204	[M+H]+	3	-	-	446544	283301	513270	343913	189970	294531	326868	316640	322196	-	-	-
MWSslk197	Secoxyloganin	Terpenoids	Monoterpenoids	C17H24O11	405.14	165.05	404.132	[M+H]+	3	58822-47-2	-	75785.9	54341.7	61736	6066.72	6066.72	6066.72	67823	30333.6	80350.1	-	-	-
WaXYp03037	2,3-Dihydroxy-3,7-dimethyl-6-octenyl β-D-glucopyranoside	Terpenoids	Monoterpenoids	C16H30O8	351.2	153.13	350.193	[M+H]+	1	-	-	27740.3	18087.2	70815.5	2819.47	2819.47	2819.47	14097.4	42058.6	19356.5	-	-	-
Sasp010704	(2E,4Z,6E)-7-(4,4-dimethyl-1,5,6,7-tetrahydroinden-2-yl)-3-methylocta-2,4,6-trienal	Terpenoids	Ditepenoids	C20H26O	283.21	183.12	282.198	[M+H]+	3	-	-	4.54437e+06	3.20694e+06	4.76309e+06	7.59498e+06	6.22742e+06	7.85645e+06	3.15509e+06	4.00189e+06	4.0157e+06	-	-	-
Qmmp111813	Ent-Sessilifol M	Terpenoids	Ditepenoids	C20H30O2	303.23	191.18	302.225	[M+H]+	3	-	-	37056.1	37056.1	37056.1	37056.1	37056.1	37056.1	382232	185281	256704	-	-	-
Zasp007391	palbinone	Terpenoids	Terpene	C22H30O4	359.22	323.2	358.214	[M+H]+	3	139954-00-0	-	547801	553946	595628	353821	427709	434774	701563	463277	581260	-	-	-
Zjjp092633	Dendroside A	Terpenoids	Sesquiterpenoids	C21H36O8	417.25	201.16	416.241	[M+H]+	3	-	-	105238	151031	63113.1	52349.5	69477	125550	43311.1	28745.3	73380.7	-	-	-
Zahp012121	1β-hydroxy-4(15),5E,10(14)-germacratriene	Terpenoids	Sesquiterpenoids	C15H24O	221.19	119.09	220.183	[M+H]+	3	-	-	2.80637e+06	3.44008e+06	3.19905e+06	2.29087e+06	3.61913e+06	2.99629e+06	2.17553e+06	2.79883e+06	2.48867e+06	-	-	-
Qatp009522	Dehydrosaussurea lactone*	Terpenoids	Sesquiterpenoids	C15H20O2	233.15	187.15	232.146	[M+H]+	2	-	-	1.06095e+06	815339	693175	1.1952e+06	1.30393e+06	930397	1.50477e+06	924873	1.14069e+06	-	-	-
Ljmp121502	Mansonone Q	Terpenoids	Sesquiterpenoids	C15H20O4	265.14	121.06	264.136	[M+H]+	3	-	-	14807.5	14807.5	14807.5	173746	224005	230921	203628	229968	141123	-	-	-
pme3459	Cafestol	Terpenoids	Ditepenoids	C20H28O3	317.21	299.2	316.204	[M+H]+	3	469-83-0	C09066	4.51783e+07	4.59405e+07	3.40661e+07	4.17651e+07	5.30466e+07	5.48404e+07	3.12349e+07	1.97726e+07	3.2183e+07	-	C09066	-
Lazp009900	Fleuryinol C	Terpenoids	Ditepenoids	C20H30O3	319.23	107.05	318.219	[M+H]+	3	-	-	5.90189e+06	5.88697e+06	6.31083e+06	4.59364e+06	5.38489e+06	4.34087e+06	4.77832e+06	5.17374e+06	4.81755e+06	-	-	-
zjbp111643	neopetasane	Terpenoids	Sesquiterpenoids	C15H22O	219.17	81.07	218.167	[M+H]+	3	151282-84-7	-	935822	1.08835e+06	1.06295e+06	310136	376587	436230	300752	345783	330033	-	-	-
Smlp005221	Podolactone D	Terpenoids	Ditepenoids	C20H24O7S	409.13	121.03	408.124	[M+H]+	3	-	-	3911.62	3911.62	3911.62	43313.1	90118.8	56557.3	39396.1	19558.1	39366.9	-	-	-
MWSHC2069	(2R,5S,8S)-3,4,5,6,7,8-Hexahydro-2,5-dihydroxy-2,5-dimethyl-8-(1-methylethyl)-1(2H)-naphthalenone	Terpenoids	Sesquiterpenoids	C15H24O3	253.18	119.09	252.173	[M+H]+	3	953425-61-1	-	160115	241133	300989	464166	267671	381444	299446	279348	234173	-	-	-
Hasp013107	Saurufuran B	Terpenoids	Ditepenoids	C20H28O3	317.21	95.05	316.204	[M+H]+	3	425368-87-2	-	747888	171064	740091	2.81399e+06	2.5023e+06	2.4878e+06	34212.8	34212.8	34212.8	-	-	-
Wadp008128	3-Oxo-9beta-pimara-7,15-dien-19,6beta-olide	Terpenoids	Ditepenoids	C20H26O3	315.19	147.08	314.188	[M+H]+	3	-	-	8214.12	8214.12	8214.12	107190	104307	70321	43893.3	54253.2	41070.6	-	-	-
Smlp003674	Nagilactone B	Terpenoids	Terpene	C19H24O7	365.16	365.16	364.152	[M+H]+	3	19891-51-1	-	209977	209977	209977	209977	209977	209977	1.04988e+06	1.34253e+06	1.35369e+06	-	-	-
MWSslk129	Verbenone	Terpenoids	Monoterpenoids	C10H14O	151.11	109.06	150.105	[M+H]+	3	1196-01-6	C09913	684456	754571	738649	1.02172e+06	894395	921284	2.07006e+06	2.0793e+06	1.95574e+06	-	C09913	-
Wacyp04942	2,7-Dimethyl-2,4-Octadiene-1,8-Diol 8-O-B-D-Glucopyranoside	Terpenoids	Monoterpenoids	C16H28O7	350.22	153.13	332.183	[M+NH4]+	1	-	-	76543.1	36677.8	25538.9	5107.78	5107.78	5107.78	35939.7	56666.3	30125.6	-	-	-
MWSslk245	Darutigenol	Terpenoids	Ditepenoids	C20H34O3	323.26	287.24	322.251	[M+H]+	2	5940-00-1	-	139350	123890	77057.9	192685	128720	155923	47517.6	124656	131088	-	-	-
Wadp007964	7-Oxo-pimara-8,11,15-trien-2-ol	Terpenoids	Ditepenoids	C20H28O2	301.22	147.08	300.209	[M+H]+	3	-	-	2.72008e+07	2.57692e+07	2.67061e+07	3.16101e+07	2.47375e+07	2.51872e+07	2.04246e+06	2.04246e+06	2.04246e+06	-	-	-
Cmpp004946	Isoobacunoic acid	Terpenoids	Triterpene	C26H32O8	473.22	427.21	472.21	[M+H]+	3	751-28-0	-	156817	162948	217664	139767	370446	125323	212612	139671	187983	-	-	-
Lhgp102025	Zerumin A	Terpenoids	Ditepenoids	C20H30O3	319.23	301.22	318.219	[M+H]+	3	176050-48-9	-	4.99868e+06	3.56988e+06	3.49469e+06	3.96792e+06	4.23539e+06	4.41703e+06	5.68544e+06	5.42503e+06	3.14907e+06	-	-	-
pmp000970	Hispanolone	Terpenoids	Ditepenoids	C20H30O3	319.22	301.22	318.219	[M+H]+	3	18676-07-8	-	1.72307e+07	1.95043e+07	1.74731e+07	1.34219e+07	1.3746e+07	1.22019e+07	1.19071e+07	1.39738e+07	1.30849e+07	-	-	-
Qmyp122112	5α,11-Dihydroxy-3-ene-eudesman-2-one	Terpenoids	Sesquiterpenoids	C15H24O3	253.18	133.1	252.173	[M+H]+	3	-	-	49651.9	49651.9	49651.9	960131	1.13575e+06	1.17209e+06	792882	507944	454076	-	-	-
Qmxp082405	Isoscoparin L*	Terpenoids	Ditepenoids	C20H30O4	335.22	271.21	334.214	[M+H]+	3	-	-	1.77279e+06	2.67506e+06	1.94095e+06	1.6533e+06	3.22607e+06	2.02245e+06	3.41755e+06	1.60246e+06	1.4154e+06	-	-	-
Zbkp007535	Artemisin	Terpenoids	Ditepenoids	C15H18O4	263.13	131.09	262.12	[M+H]+	3	481-05-0	C09344	22413.2	22413.2	22413.2	157056	112066	145067	22413.2	22413.2	22413.2	-	C09344	-
Zmlp008132	17-Hydroxy Jolkinolide A (Caudicifolin)	Terpenoids	Ditepenoids	C20H26O4	331.19	163.07	330.183	[M+H]+	3	-	-	1.21021e+07	1.30631e+07	1.3467e+07	2.9008e+06	3.487e+06	2.9163e+06	1.42577e+07	1.38227e+07	1.23821e+07	-	-	-
Zbkp010423	Zerumbone	Terpenoids	Ditepenoids	C15H22O	219.17	109.1	218.167	[M+H]+	3	471-05-6	C20262	67140	67140	67140	335700	405033	414946	518938	427514	615119	-	C20262	-
mws1526	Sweroside	Terpenoids	Monoterpenoids	C16H22O9	359.13	197.08	358.126	[M+H]+	2	14215-86-2	C17071	22904	22904	22904	310669	114520	180771	22904	22904	22904	-	C17071	-
Zjxp110304	3-Hydroxy-3,7,11-trimethyldodeca-1,6E,10-trien-9-yl isobutyrate	Terpenoids	Sesquiterpenoids	C18H30O3	295.23	151.11	294.219	[M+H]+	3	-	-	54575.3	50566.3	39284.6	59512.7	63538.2	80765	30993.1	30531.1	55613	-	-	-
Yalp011328	Labda-8(20),12,14-trien-3α-ol	Terpenoids	Ditepenoids	C20H32O	289.25	147.12	288.245	[M+H]+	3	-	-	1.49205e+06	1.10716e+06	1.10143e+06	220285	220285	220285	220285	220285	220285	-	-	-
zjbp111621	12,15-dioxo-α-selinen*	Terpenoids	Sesquiterpenoids	C15H20O2	233.15	131.09	232.146	[M+H]+	3	-	-	724428	542820	574084	636049	625290	999156	1.15524e+06	661676	811825	-	-	-
MWSprf102	Steviol	Terpenoids	Ditepenoids	C20H30O3	319.23	255.21	318.219	[M+H]+	1	471-80-7	C20212	3.1388e+06	9.79094e+06	7.39193e+06	6.80149e+06	5.89311e+06	4.63894e+06	9.13142e+06	7.86037e+06	6.87476e+06	-	C20212	-
Lhcp090202	3-(Acetyloxy)-13,15-dihydroxyoleanan-12-one (Rubiprasin A)	Terpenoids	Triterpene	C32H52O5	517.39	425.34	516.381	[M+H]+	3	125263-65-2	-	8786.74	8786.74	8786.74	150288	135881	134217	43933.7	59456.5	53950	-	-	-
Smmp009329	Isorosmanol	Terpenoids	Ditepenoids	C20H26O5	347.18	301.18	346.178	[M+H]+	3	93780-80-4	-	215548	215548	215548	1.07774e+06	1.17327e+06	1.14205e+06	215548	215548	215548	-	-	-
WaYp004901	Reseoside	Terpenoids	Monoterpenoids	C19H30O7	371.21	191.14	370.199	[M+H]+	1	-	-	426388	284006	317788	525775	448923	595070	56801.2	56801.2	56801.2	-	-	-
Lmjp009643	Dihydropyrocurzerenone	Terpenoids	Sesquiterpenoids	C15H18O	215.14	145.1	214.136	[M+H]+	3	59462-26-9	-	756331	379376	2.50744e+06	2.25675e+06	839044	784574	1.04736e+06	945644	2.03857e+06	-	-	-
Lamp005564	Borneol-2-O-β-D-apiofuranosyl(1→6)-β-D-glucopyranoside	Terpenoids	Terpene	C21H36O10	449.24	137.13	448.231	[M+H]+	2	-	-	39180.4	39180.4	39180.4	554270	477750	653725	195902	395097	265916	-	-	-
MWStz735	Ganoderal A	Terpenoids	Triterpene	C30H44O2	437.34	391.33	436.334	[M+H]+	3	104700-98-3	-	546856	490962	595066	33084.9	33084.9	33084.9	224960	293722	165425	-	-	-
Lhgp102110	agarofuran	Terpenoids	Sesquiterpenoids	C15H24O	221.19	119.09	220.183	[M+H]+	3	-	-	654269	655183	772839	811641	732217	836604	844308	567549	491876	-	-	-
Lamp007903	15-Hydroxy-T-muurolol	Terpenoids	Sesquiterpenoids	C15H26O2	239.2	81.07	238.193	[M+H]+	3	-	-	70374.9	112264	123896	14075	14075	14075	131926	85008	132614	-	-	-
Sayp007892	demethylcaesaldekarin C	Terpenoids	Ditepenoids	C20H28O4	333.21	287.2	332.199	[M+H]+	3	-	-	626472	626472	626472	3.73165e+06	3.13236e+06	4.12173e+06	626472	626472	626472	-	-	-
Yhhp003898	phlomuroside*	Terpenoids	Monoterpenoids	C19H32O8	389.22	209.15	388.21	[M+H]+	1	-	-	10703.2	10703.2	10703.2	10703.2	10703.2	10703.2	53516	96554.8	438506	-	-	-
zjmp122401	Aseleposide E*	Terpenoids	Monoterpenoids	C19H32O8	389.22	209.15	388.21	[M+H]+	1	-	-	10703.2	10703.2	10703.2	10703.2	10703.2	10703.2	53516	96554.8	438506	-	-	-
Lhlp120609	Dehydropicatoside A	Terpenoids	Monoterpenoids	C16H22O7	327.14	165.09	326.137	[M+H]+	3	-	-	1.31971e+06	1.4708e+06	1.39784e+06	515379	547683	695066	440471	406699	335403	-	-	-
Wacyp03558	2,7-Dimethyl-2,6-Octadiene-1,4,8-Triol 8-O-B-D-Glucopyranoside	Terpenoids	Monoterpenoids	C16H28O8	366.21	169.12	348.178	[M+NH4]+	2	-	-	83212.7	56743.3	76016.5	11348.7	11348.7	11348.7	11348.7	11348.7	11348.7	-	-	-
Qmdp112501	Negundoin G	Terpenoids	Ditepenoids	C20H30O3	319.23	95.09	318.219	[M+H]+	3	-	-	1.15919e+06	1.12211e+06	948071	1.43865e+06	1.34626e+06	904917	757173	632762	614878	-	-	-
zjbp111615	4-hydroxyl-baimuxinol	Terpenoids	Sesquiterpenoids	C15H26O3	255.2	159.12	254.188	[M+H]+	3	-	-	626813	571317	359825	356529	693198	259541	359174	301217	353736	-	-	-
Qmxp082409	Minheryin G	Terpenoids	Ditepenoids	C20H30O5	351.22	217.16	350.209	[M+H]+	3	-	-	216842	199718	207460	322597	313243	270438	14071.8	14071.8	14071.8	-	-	-
Sagp009218	Kanshone H	Terpenoids	Sesquiterpenoids	C15H20O	217.16	175.11	216.151	[M+H]+	3	-	-	309865	212088	331737	179916	398108	252646	377109	351664	160299	-	-	-
Jmcp010061	costic acid	Terpenoids	Sesquiterpenoids	C15H22O2	235.17	189.16	234.162	[M+H]+	3	3650-43-9	-	66610.1	66610.1	66610.1	691353	694894	690379	66610.1	66610.1	66610.1	-	-	-
Zmjp003597	Ampelopsisionoside	Terpenoids	Sesquiterpenoids	C19H32O8	389.21	191.15	388.21	[M+H]+	1	138665-44-8	-	74499.9	34199.5	78431.7	6839.9	6839.9	6839.9	103310	35843.9	137437	-	-	-
Zbkp008898	Palustradienol	Terpenoids	Ditepenoids	C20H32O	289.25	123.11	288.245	[M+H]+	3	-	C18219	762116	710264	565299	113060	113060	113060	113060	113060	113060	ko00904,ko01110	C18219	-
Qmyp101331	3β-Acetoxyspirillanone	Terpenoids	Sesquiterpenoids	C17H26O3	279.19	149.02	278.188	[M+H]+	1	-	-	163970	152500	224240	766898	816839	507880	158205	317250	176363	-	-	-
Safn005826	(2R)-2-[(2S,3S)-8-methyl-3-({[(2S,3R,4S,5S,6R)-3,4,5-trihydroxy-6-(hydroxymethyl)oxan-2-yl]oxy}carbonyl)-1,2,3,5,6,7-hexahydronaphthalen-2-yl]propanoic acid	Terpenoids	Sesquiterpenoids	C21H30O9	485.2	263.13	426.189	[M+CH3COOH-H]-	3	-	-	110512	128743	206872	98045.1	52381.4	327013	174397	272287	231906	-	-	-
Cmmn012850	Communic Acid	Terpenoids	Ditepenoids	C20H30O2	301.22	205.12	302.225	[M-H]-	3	2761-77-5	-	10798	9313.63	9487.68	7736.27	7768.64	8012.95	11853.1	13891	13839	-	-	-
Wahln04871	8-(Beta-D-Glucopyranosyloxy)-2,7-Dimethyldec-2-enedioic acid	Terpenoids	Monoterpenoids	C18H30O10	405.18	225.11	406.183	[M-H]-	2	-	-	587671	587648	680501	1.19468e+06	1.0659e+06	1.18059e+06	731867	605438	601245	-	-	-
Wbmn009893	3-Acetoxy-9,13-epoxy-16-hydroxy-labda-15,16-olide	Terpenoids	Ditepenoids	C22H34O6	393.22	333.21	394.236	[M-H]-	3	-	-	222495	202594	212866	271418	246038	280067	532809	455727	427035	-	-	-
Ylyn013135	demethylregelin	Terpenoids	Triterpene	C30H46O4	469.33	469.33	470.34	[M-H]-	3	173991-81-6	-	2.11576e+07	1.99446e+07	2.13739e+07	2.42916e+07	2.53668e+07	2.42638e+07	3.74083e+06	3.92999e+06	4.20616e+06	-	-	-
Wbmn010531	Previtexilactone	Terpenoids	Ditepenoids	C22H34O5	377.23	317.21	378.241	[M-H]-	3	61263-52-3	-	369650	403592	376733	386514	383971	365650	494480	534300	529437	-	-	-
Qahn011632	Biondinin C	Terpenoids	Monoterpenoids	C19H24O3	299.16	117.04	300.173	[M-H]-	3	55511-08-5	C17850	379404	344403	385087	513480	530373	497192	487157	494725	498269	-	C17850	-
Hmyn009687	Oxyphyllol D	Terpenoids	Sesquiterpenoids	C15H24O3	251.17	191.14	252.173	[M-H]-	3	-	-	28724.7	21108.4	34248	65385.8	62378.1	72767.6	91074.3	126094	149818	-	-	-
Lmbn014696	(+)-Pimaric acid*	Terpenoids	Ditepenoids	C20H30O2	301.22	301.22	302.225	[M-H]-	1	127-27-5	C09159	1.29005e+09	1.26336e+09	1.29554e+09	1.39587e+09	1.29267e+09	1.3463e+09	1.46936e+09	1.4444e+09	1.46908e+09	-	C09159	-
Cmmn012461	Dehydroabietic acid	Terpenoids	Ditepenoids	C20H28O2	299.2	299.2	300.209	[M-H]-	3	1740-19-8	C12078	4.92632e+08	4.72099e+08	4.8135e+08	4.76252e+08	4.87083e+08	4.61673e+08	4.22723e+08	4.19313e+08	4.13288e+08	-	C12078	-
Wahln11065	Irone	Terpenoids	Monoterpenoids	C14H22O	205.16	189.13	206.167	[M-H]-	3	-	-	1.90027e+06	2.15702e+06	2.01548e+06	1.95099e+06	2.03179e+06	2.06557e+06	2.48535e+06	2.53908e+06	2.50968e+06	-	-	-
MWSmce371	Atractylenolide III*	Terpenoids	Sesquiterpenoids	C15H20O3	247.13	203.14	248.141	[M-H]-	3	73030-71-4	C17887	112344	126576	109846	280219	269743	258413	121151	134577	149023	-	C17887	-
Lmjn008534	Shizukolidol*	Terpenoids	Sesquiterpenoids	C15H20O3	247.13	203.14	248.141	[M-H]-	3	90332-92-6	-	112344	126576	109846	280219	269743	258413	121151	134577	149023	-	-	-
Wbmn006856	Coeloginin	Terpenoids	Triterpene Saponin	C17H14O6	313.07	253.05	314.079	[M-H]-	3	82358-34-7	-	1.1754e+06	1.25355e+06	1.5146e+06	1.33696e+06	1.50191e+06	1.54345e+06	707157	838841	806670	-	-	-
Ymjm000063	Aldovibsanin A	Terpenoids	Ditepenoids	C20H30O4	333.21	287.2	334.214	[M-H]-	3	-	-	1.48617e+06	1.48739e+06	1.4269e+06	1.58621e+06	1.63584e+06	1.60348e+06	1.36966e+06	1.26787e+06	1.17497e+06	-	-	-
Cmrn003275	Kankanoside E	Terpenoids	Monoterpenoids	C16H28O8	347.17	101.02	348.178	[M-H]-	3	-	-	3.21899e+06	3.32204e+06	2.98034e+06	5.13379e+06	4.85864e+06	4.81301e+06	2.00128e+06	2.13385e+06	1.89942e+06	-	-	-
Wcgn010941	Araucarol	Terpenoids	Ditepenoids	C20H32O3	319.23	257.23	320.235	[M-H]-	3	-	-	161698	120569	160706	113135	153805	153674	168727	132139	167333	-	-	-
Wasn006585	Geranyl 3-O-xylopyranosyl-glucopyranoside	Terpenoids	Monoterpenoids	C21H36O10	447.22	315.18	448.231	[M-H]-	2	-	-	1.22843e+06	1.01258e+06	1.13898e+06	2.85969e+06	2.72705e+06	2.6738e+06	1.25913e+06	1.24276e+06	1.25103e+06	-	-	-
Cmcn011220	Imbricatolic acid	Terpenoids	Ditepenoids	C20H34O3	321.25	221.15	322.251	[M-H]-	3	6832-60-6	-	40068.6	34939.6	34002.5	165693	169216	165076	162535	155194	146874	-	-	-
Lcsn000624	Andropanoside	Terpenoids	Ditepenoids	C26H40O9	495.26	333.21	496.267	[M-H]-	3	82209-72-1	-	193967	93801.2	123526	212324	244801	141874	123646	196541	120850	-	-	-
Lmdn001560	6-DeoxyCatalpol	Terpenoids	Monoterpenoids	C15H22O9	345.12	165.06	346.126	[M-H]-	2	99499-99-7	-	2.33316e+06	2.12436e+06	2.18087e+06	2.97896e+06	2.31315e+06	3.13666e+06	2.18437e+06	2.03584e+06	1.83371e+06	-	-	-
Cmmn013275	Isopimaric acid*	Terpenoids	Ditepenoids	C20H30O2	301.22	301.22	302.225	[M-H]-	1	5835-26-7	C09118	1.24446e+09	1.24603e+09	1.26076e+09	1.34797e+09	1.24195e+09	1.30947e+09	1.43243e+09	1.41091e+09	1.45664e+09	ko00904,ko01110	C09118	-
Cmmn013378	Levopimaric acid*	Terpenoids	Ditepenoids	C20H30O2	301.22	301.22	302.225	[M-H]-	1	79-54-9	C11888	1.22865e+09	1.25639e+09	1.26338e+09	1.34512e+09	1.26196e+09	1.31365e+09	1.42974e+09	1.38034e+09	1.44463e+09	ko00904,ko01110	C11888	-
Wbmn002291	Kobusone	Terpenoids	Sesquiterpenoids	C14H22O2	221.15	220.15	222.162	[M-H]-	3	-	-	15164.6	17213.4	11593.8	12967	9360.6	8605.62	18233.5	26379.8	19503.2	-	-	-
Sasn002370	Deacetyl asperulosidic acid methyl ester*	Terpenoids	Monoterpenoids	C17H24O11	403.12	167.04	404.132	[M-H]-	1	52613-28-2	-	1.64755e+07	1.4458e+07	1.37462e+07	9.46104e+06	9.90549e+06	1.06243e+07	1.54537e+07	1.61481e+07	1.37584e+07	-	-	-
Wahln02628	Theviridoside*	Terpenoids	Monoterpenoids	C17H24O11	403.12	167.03	404.132	[M-H]-	1	23407-76-3	-	1.44596e+07	1.42929e+07	1.38322e+07	1.02467e+07	9.11169e+06	9.75874e+06	1.48436e+07	1.54085e+07	1.54841e+07	-	-	-
mws1574	Geniposidic acid*	Terpenoids	Monoterpenoids	C16H22O10	373.11	123.01	374.121	[M-H]-	3	27741-01-1	C11673	450908	390216	406451	213348	194270	183665	225520	205799	230619	ko00902,ko01110	C11673	-
MWStz546	Oleoside 11-methyl ester	Terpenoids	Monoterpenoids	C17H24O11	403.13	119.04	404.132	[M-H]-	3	60539-23-3	-	84557.5	75553.1	92115.8	115382	157273	117722	57281.2	55844	106834	-	-	-
Lmjn010398	Ciliaric acid	Terpenoids	Sesquiterpenoids	C20H30O3	317.21	255.21	318.219	[M-H]-	3	35682-59-8	-	5.09157e+06	4.64174e+06	5.19029e+06	5.54377e+06	5.51192e+06	5.63164e+06	5.74259e+06	5.97236e+06	5.76952e+06	-	-	-
Hmqn005002	12-Hydroxymethylabietate	Terpenoids	Ditepenoids	C21H32O3	331.23	299.2	332.235	[M-H]-	3	-	-	2.33446e+06	2.24549e+06	2.31242e+06	2.01964e+06	1.9994e+06	1.93968e+06	1.8369e+06	1.84261e+06	1.83203e+06	-	-	-
mws1389	3-Hydroxyolean-12-en-28-oic acid (Oleanolic acid)*	Terpenoids	Triterpene	C30H48O3	455.35	455.35	456.36	[M-H]-	3	508-02-1	C17148	285458	352317	397695	569070	643704	564018	138287	367180	407776	ko00999,ko01100,ko01110	C17148	-
Lmhn011365	Morolic acid*	Terpenoids	Triterpene	C30H48O3	455.35	455.35	456.36	[M-H]-	3	559-68-2	-	245191	345621	336159	637612	674721	667660	131402	367969	364287	-	-	-
Lmdn001501	Gardoside*	Terpenoids	Monoterpenoids	C16H22O10	373.11	123.05	374.121	[M-H]-	3	54835-76-6	C16963	492523	482582	379588	222221	222406	242938	308534	259242	266762	-	C16963	-
Hmdn006685	3,4-Cycloopen-cycloaltin-4(29),25-diene-24-hydroxy-3-carboxylic acid*	Terpenoids	Triterpene	C30H48O3	455.35	455.35	456.36	[M-H]-	3	-	-	269436	128053	150849	194823	282706	189523	317871	262620	282085	-	-	-
pmf0348	2,6-Dimethyl-7-octene-2,3,6-triol	Terpenoids	Monoterpenoids	C10H20O3	187.13	97.06	188.141	[M-H]-	3	73815-21-1	-	113801	110912	120082	115109	111985	113897	91786.3	82490.9	79784.6	-	-	-
Lmdn003699	6-O-Trans-Caffeoyl Ajugol	Terpenoids	Monoterpenoids	C24H30O12	509.17	179.03	510.174	[M-H]-	3	-	-	2.28146e+07	3.3664e+07	2.22343e+07	5.56411e+06	6.76154e+06	4.99612e+06	5.67167e+07	1.56841e+07	4.11779e+07	-	-	-
Wmxn006759	Cleistanthol	Terpenoids	Ditepenoids	C20H28O3	315.19	315.19	316.204	[M-H]-	3	24465-21-2	-	4.21298e+06	2.39241e+06	2.70018e+06	4.87494e+06	4.60901e+06	2.3907e+06	3.03375e+06	2.22495e+06	1.93727e+06	-	-	-
Cmrn002988	Kankanoside A	Terpenoids	Monoterpenoids	C16H26O8	345.16	101.02	346.163	[M-H]-	3	-	-	1.06889e+07	9.28073e+06	8.31092e+06	1.99389e+07	1.22578e+07	1.17405e+07	9.00787e+06	9.02724e+06	7.81505e+06	-	-	-
Saln004355	Luzonoside C	Terpenoids	Monoterpenoids	C26H32O12	535.18	343.12	536.189	[M-H]-	3	-	-	2.5342e+06	2.11878e+06	2.69177e+06	2.57526e+06	1.74621e+06	2.30466e+06	2.45878e+06	2.19453e+06	2.36111e+06	-	-	-
MWSmce497	Oxypaeoniflorin	Terpenoids	Monoterpenoids	C23H28O12	495.15	137.03	496.158	[M-H]-	2	39011-91-1	-	770140	561536	562407	459534	556628	455245	605858	473884	400341	-	-	-
Waptn03507	Vomifoliol-D-glucopyranoside	Terpenoids	Monoterpenoids	C19H30O8	445.21	153.09	386.194	[M+CH3COO]-	3	-	-	1.46269e+06	1.49705e+06	518728	1.30995e+06	715522	1.0874e+06	1.3509e+06	1.083e+06	1.01758e+06	-	-	-
Xmmn006031	Borneol 7-O-[β-D-apiofuranosyl-(1→6)]-β-D-glucopyranoside*	Terpenoids	Monoterpenoids	C21H36O10	447.22	315.18	448.231	[M-H]-	1	88700-35-0	-	1.19268e+06	1.23239e+06	1.59642e+06	3.04508e+06	2.5851e+06	2.91856e+06	505702	1.11666e+06	898885	-	-	-
Xmcn005741	patrinioside*	Terpenoids	Sesquiterpenoids	C21H36O10	447.23	315.19	448.231	[M-H]-	1	-	-	1.19268e+06	1.23239e+06	1.59642e+06	3.04508e+06	2.5851e+06	2.91856e+06	505702	1.11666e+06	898885	-	-	-
Lmtn004049	Abscisate	Terpenoids	Sesquiterpenoids	C15H20O4	263.13	204.12	264.136	[M-H]-	2	21293-29-8	C06082	227227	204282	158141	500168	540911	472128	459725	445731	442213	ko00906,ko01100,ko01110,ko04075	C06082	-
Safn005200	Supinenolone D	Terpenoids	Triterpene	C30H44O3	511.35	451.33	452.329	[M+CH3COOH-H]-	3	-	-	2.17513e+06	1.94674e+06	2.04172e+06	1.17903e+06	2.75186e+06	2.54908e+06	2.92818e+06	2.58281e+06	2.7814e+06	-	-	-
Saln004708	1-O-Glucopyranosylamplexine	Terpenoids	Monoterpenoids	C16H26O9	361.15	199.1	362.158	[M-H]-	3	-	-	2.04246e+06	2.10729e+06	2.17789e+06	3.94313e+06	3.79252e+06	3.01612e+06	3.70542e+06	2.9846e+06	3.96887e+06	-	-	-
Hahn002084	6'-O-caffeoylcatalpol	Terpenoids	Monoterpenoids	C24H28O13	523.15	161.03	524.153	[M-H]-	3	-	-	674594	657570	724678	372195	405750	243803	216928	255627	279163	-	-	-
Wbkn005292	[(1S,2S,3S,7R,9R,13S,14R,15R,17S)-3,15-diacetyloxy-7-hydroxy-2,6,14-trimethyl-4,11,16-trioxo-10-oxatetracyclo[7.7.1.02,7.013,17]heptadec-5-en-17-yl]methylacetate	Terpenoids	Ditepenoids	C26H32O11	519.18	357.13	520.194	[M-H]-	3	-	-	6.87581e+06	6.02745e+06	1.0765e+07	2.23088e+07	1.68095e+07	1.89173e+07	3.98303e+06	2.00389e+06	1.8125e+06	-	-	-
Lmdn003749	6-O-Vanilloylajugol	Terpenoids	Monoterpenoids	C23H30O12	497.17	167.03	498.174	[M-H]-	3	124168-04-3	-	57315.2	37168.8	37911.6	80294.9	72154	70647.2	24825.1	35015.7	31000.5	-	-	-
Lmmn003822	(4β,10E)-6α,15-Dihydroxy-8β-(angeloyloxy)-14-oxogermacra-1(10),11(13)-diene-12-oic acid-12,6-lactone	Terpenoids	Sesquiterpenoids	C20H26O6	361.16	165.05	362.173	[M-H]-	3	-	-	1.07557e+06	1.27224e+06	946898	1.3986e+06	1.638e+06	1.48412e+06	767041	806765	763236	-	-	-
Wasn002508	Glucosyl 7-methyl-3-methyleneoctane-1,2,6,7-tetraol	Terpenoids	Monoterpenoids	C16H30O9	365.18	203.13	366.189	[M-H]-	3	-	-	1.08987e+06	744378	967310	1.16213e+06	1.2164e+06	1.08155e+06	1.77218e+06	1.70649e+06	1.56745e+06	-	-	-
Laxp004658	Phaseic Acid	Terpenoids	Sesquiterpenoids	C15H20O5	279.12	139.08	280.131	[M-H]-	3	24394-14-7	C09707	408511	310847	519578	282954	302343	273605	270287	332704	262983	ko00906	C09707	-
Zbbn004440	10-O-Caffeoyl-geniposidic acid	Terpenoids	Monoterpenoids	C25H28O13	535.15	329.1	536.153	[M-H]-	3	-	-	1.47821e+07	1.24712e+07	1.37747e+07	2.81162e+07	3.06258e+07	3.04149e+07	1.82124e+07	2.24627e+07	2.12929e+07	-	-	-
Wahln04592	3,7-Dimethyl-5-Oxo-2,6-Octadien-1-Yl]Beta-D-Glucopyranoside	Terpenoids	Monoterpenoids	C16H26O7	389.18	161.05	330.168	[M+CH3COO]-	1	-	-	576150	555783	492014	667720	679437	615678	526394	511090	490017	-	-	-
Wasn003942	Glucosyl 6,9-dihydroxydec-4-enoic acid	Terpenoids	Monoterpenoids	C16H28O9	363.17	201.11	364.173	[M-H]-	1	-	-	2.37468e+06	2.6901e+06	2.39251e+06	2.78792e+06	2.74668e+06	2.55471e+06	1.56086e+06	1.46692e+06	1.25602e+06	-	-	-
pmn001381	Eucommioside	Terpenoids	Monoterpenoids	C15H26O9	349.15	187.1	350.158	[M-H]-	2	-	-	329678	382105	313891	553652	564039	540881	447728	444274	420437	-	-	-
Lmdn003674	6-O-p-HydroxybenzoylAjugol	Terpenoids	Monoterpenoids	C22H28O11	467.16	137.02	468.163	[M-H]-	2	-	-	625769	622777	599151	1.84011e+06	2.02585e+06	2.04142e+06	1.1588e+06	1.26112e+06	1.24665e+06	-	-	-
Yajn003045	Ebuloside	Terpenoids	Monoterpenoids	C21H32O10	443.19	59.01	444.2	[M-H]-	3	-	-	147004	176298	127194	87124.4	82716.2	100843	181392	129558	126896	-	-	-
Safn005230	(2E,6Z)-2,6-dimethyl-8-{[(2R,3R,4S,5S,6R)-3,4,5-trihydroxy-6-(hydroxymethyl)oxan-2-yl]oxy}octa-2,6-dienoic acid	Terpenoids	Monoterpenoids	C16H26O8	345.15	59.01	346.163	[M-H]-	3	-	-	1.43687e+07	1.31509e+07	1.25212e+07	1.53545e+07	1.92053e+07	1.55337e+07	1.30247e+07	1.24155e+07	1.18426e+07	-	-	-
Lhyp112511	Rumphioside B	Terpenoids	Ditepenoids	C28H38O13	581.22	329.14	582.231	[M-H]-	3	-	-	155012	177771	507351	97094.3	85555.9	31991.1	119713	138551	597215	-	-	-
Lmxn004090	6''-O-Caffeoylharpagide	Terpenoids	Terpene	C24H30O13	525.16	161.02	526.169	[M-H]-	2	1147125-45-8	-	8.87193e+06	1.04331e+07	1.21527e+07	7.69424e+06	5.70385e+06	4.85955e+06	6.52242e+06	7.14116e+06	9.28771e+06	-	-	-
Smln010875	inumakoic acid	Terpenoids	Ditepenoids	C20H28O3	315.2	271.2	316.204	[M-H]-	2	-	-	1.63838e+07	1.49898e+07	1.66455e+07	4.42083e+06	4.4239e+06	4.37341e+06	1.07613e+07	1.14898e+07	1.11281e+07	-	-	-
Ymjm000113	Kanokoside B	Terpenoids	Terpene	C21H34O12	477.2	181.09	478.205	[M-H]-	3	-	C17429	270708	1.4875e+06	1.337e+06	583542	803243	862081	988597	1.00795e+06	870996	-	C17429	-
Saln003581	6'-O-β-D-Glucopyranosyl Swertiamarin	Terpenoids	Monoterpenoids	C22H32O15	535.17	355.1	536.174	[M-H]-	2	-	-	47728.3	61905.6	66279.6	44450.8	24314.9	39789	56770	51029.5	43947.7	-	-	-
Wbkn004126	Javanicolide C	Terpenoids	Ditepenoids	C26H36O11	523.22	361.16	524.226	[M-H]-	3	-	-	6.86095e+06	7.91332e+06	7.6165e+06	6.16275e+06	4.28192e+06	6.39504e+06	5.7866e+06	5.92511e+06	5.64538e+06	-	-	-
Zaxn007230	Isopimaradieneone	Terpenoids	Ditepenoids	C20H30O	285.22	285.22	286.23	[M-H]-	2	-	-	404946	385846	181268	204816	198267	390829	246677	201862	510536	-	-	-
MWSmce063	Podocarpic acid	Terpenoids	Ditepenoids	C17H22O3	273.16	227.15	274.157	[M-H]-	2	5947-49-9	C09171	7.16484e+06	6.98147e+06	6.77795e+06	5.8385e+06	5.98099e+06	5.84707e+06	5.03777e+06	4.96683e+06	5.02271e+06	-	C09171	-
Hmdn006566	3,4-Open loop-lupine-4(23),20(29)-diene-24-hydroxy-3-carboxylic acid*	Terpenoids	Triterpene	C30H48O3	455.35	455.35	456.36	[M-H]-	3	-	-	238234	168531	142873	154592	282423	204243	311794	302104	286273	-	-	-
MWSmce268	Lathyrol	Terpenoids	Ditepenoids	C20H30O4	333.22	315.21	334.214	[M-H]-	2	34420-19-4	C09125	1.94662e+06	2.18291e+06	1.93886e+06	1.98601e+06	1.86107e+06	1.94792e+06	2.65724e+06	2.50535e+06	2.54484e+06	-	C09125	-
Yajn003916	(1S,4aS,7aR)-7-(3-hydroxybutyl)-4-((((2R,3R,4S,5S,6R)-3,4,5-trihydroxy-6-(hydroxymethyl)tetrahydro-2H-pyran-2-yl)oxy)methyl)-1,4a,5,6,7,7a-hexahydrocyclopenta[c]pyran-1-yl acetate	Terpenoids	Monoterpenoids	C21H34O10	445.21	59.01	446.215	[M-H]-	3	-	-	689387	699560	739732	305021	583322	332013	270507	516063	311897	-	-	-
MWStz655	8-Epideoxyloganic acid	Terpenoids	Monoterpenoids	C16H24O9	359.13	135.09	360.142	[M-H]-	1	88668-99-9	C11649	312965	453239	374903	589258	299551	576714	348109	255518	382512	-	C11649	-
Saln004300	methyl (2S,3R,4S)-3-ethenyl-4-[2-[(E)-3-(4-hydroxy-3-methoxyphenyl)prop-2-enoyl]oxyethyl]-2-[(2S,3R,4S,5S,6R)-3,4,5-trihydroxy-6-(hydroxymethyl)oxan-2-yl]oxy-3,4-dihydro-2H-pyran-5-carboxylate	Terpenoids	Monoterpenoids	C27H34O13	565.19	403.14	566.2	[M-H]-	3	-	-	229871	142902	107898	77501.3	89788.3	59190.3	113614	81091.6	86448.3	-	-	-
Hmmn003964	7-Deoxyloganic acid	Terpenoids	Monoterpenoids	C16H24O9	359.13	197.08	360.142	[M-H]-	1	22487-36-1	C11636	270607	229507	262835	210112	119754	202000	181562	181228	208374	ko00902,ko01110	C11636	-
Zaxn006117	torreyagrandate	Terpenoids	Ditepenoids	C21H30O3	329.21	329.21	330.219	[M-H]-	3	-	-	324752	324752	324752	1.83549e+06	1.62376e+06	1.63803e+06	2.12299e+06	2.24563e+06	2.16547e+06	-	-	-
Wasn005621	Glucosyl 9-hydroxy-3-methyldec-2-enoic acid	Terpenoids	Monoterpenoids	C17H30O8	361.19	199.13	362.194	[M-H]-	2	-	-	269613	291443	232057	327764	347752	259927	197982	252497	224260	-	-	-
Wasn002690	Villosolside	Terpenoids	Monoterpenoids	C16H26O9	361.15	163.08	362.158	[M-H]-	1	-	-	106562	129764	109391	444191	473513	344201	196748	134281	181749	-	-	-
Wbsn001677	Rhamnosylfucose	Terpenoids	Terpene	C12H22O9	309.12	237.06	310.126	[M-H]-	3	-	-	2.7873e+06	2.58389e+06	2.59278e+06	5.27757e+06	5.61197e+06	5.61896e+06	5.47964e+06	5.18643e+06	5.1965e+06	-	-	-
Lcsn000639	Suavioside F	Terpenoids	Ditepenoids	C26H42O9	497.27	335.22	498.283	[M-H]-	3	-	-	414583	409826	391208	750200	721414	790501	440034	460885	450029	-	-	-
Hmhn002787	Dihydrophaseic acid-O-β-D-glucoside	Terpenoids	Sesquiterpenoids	C21H32O10	443.19	161.04	444.2	[M-H]-	1	-	-	220284	140117	184991	95160.5	64427.7	92223.5	140544	154452	167090	-	-	-
Hmbn001505	6-O-Glucosyl-leucolactone	Terpenoids	Monoterpenoids	C16H26O9	361.15	317.16	362.158	[M-H]-	1	-	-	288534	243357	334253	172547	175027	180717	135085	85531.9	113389	-	-	-
Lmzn006582	2-Formyl-3-hydroxy-A(1)-norlup-20(29)-en-28-oic acid (Colubrinic acid)	Terpenoids	Triterpene	C30H46O4	469.34	469.34	470.34	[M-H]-	3	-	-	6.08596e+06	7.6783e+06	6.92047e+06	204146	204146	204146	4.43247e+06	3.85379e+06	4.66883e+06	-	-	-
Qmxn081901	Minheryin D	Terpenoids	Ditepenoids	C20H32O3	319.23	275.24	320.235	[M-H]-	3	-	-	91553.5	118718	162007	9354.26	9354.26	9354.26	113676	115103	130097	-	-	-
Hmjn008136	2,3-Dihydroxyoleana-11,13(18)-dien-28-oic acid (Camaldulenic acid)	Terpenoids	Triterpene	C30H46O4	469.33	469.33	470.34	[M-H]-	2	71850-15-2	-	7.92577e+06	8.21644e+06	8.45907e+06	1.30185e+07	1.30884e+07	1.29618e+07	140523	140523	140523	-	-	-
Lmmn004491	Medicagenic acid 3-O-triglucoside	Terpenoids	Triterpene Saponin	C48H76O21	987.49	987.49	988.488	[M-H]-	3	37838-43-0	C08959	316429	348763	294164	839440	822825	698068	306577	401031	419721	-	C08959	-
Qmxn082005	Excisusin A	Terpenoids	Ditepenoids	C22H32O5	375.22	315.2	376.225	[M-H]-	3	-	-	2.5985e+06	2.204e+06	2.40839e+06	1.48323e+06	1.48949e+06	1.47934e+06	331043	359440	379301	-	-	-
Lmmn005168	Siegesbeckic acid	Terpenoids	Ditepenoids	C20H32O4	335.22	335.22	336.23	[M-H]-	3	-	-	8.4139e+07	6.755e+07	7.53239e+07	6.04783e+07	5.18105e+07	5.48557e+07	8.16163e+06	8.16163e+06	8.16163e+06	-	-	-
Wbmn006297	5-Hydroxy-6,7,13-trimethoxy-2-oxatetracyclo[6.6.2.04,16.011,15]hexadeca-1(14),4,6,8(16),11(15),12-hexaen-3-one	Terpenoids	Triterpene Saponin	C18H16O6	327.09	312.07	328.095	[M-H]-	3	-	-	1.43665e+06	1.38094e+06	1.80759e+06	438749	355048	390022	1.38855e+06	1.30322e+06	1.35535e+06	-	-	-
Sacn003282	10-hydroxymajoroside	Terpenoids	Monoterpenoids	C17H24O11	403.12	241.07	404.132	[M-H]-	3	259753-12-3	-	189075	252166	115916	178946	154603	171615	102849	179470	79902	-	-	-
Wasn004211	Albiflorin	Terpenoids	Monoterpenoids	C23H28O11	479.16	121.03	480.163	[M-H]-	3	39011-90-0	C17457	24270.8	8993.79	27461.8	17941.5	24723.5	16449.6	11222.6	18708.6	7084.63	-	C17457	-
Wasn003353	Glucosyl 6-Hydroxy-2,6-Dimethyl-2E,7-Octadienoate	Terpenoids	Monoterpenoids	C16H26O8	405.18	183.1	346.163	[M+CH3COOH-H]-	1	-	-	22302.4	91169	63905.8	146654	74002	121710	35707.3	31654.5	54604.1	-	-	-
Zbqn008252	Rubianol-g	Terpenoids	Triterpene	C30H46O4	469.33	469.33	470.34	[M-H]-	3	-	-	7.57778e+06	7.67361e+06	6.93428e+06	1.5625e+07	1.4712e+07	1.47873e+07	2.12083e+06	2.20926e+06	609306	-	-	-
Jmcn007391	1β,3β-dihydroxy-eudesmane-5,11(13)-dien-12-oic acid	Terpenoids	Sesquiterpenoids	C15H22O4	265.14	125.1	266.152	[M-H]-	3	-	-	7001.74	8329.18	11453	29461.9	18111.7	18269.6	14858.7	8622.38	10546	-	-	-
MWSmce052	3-Hydroxyurs-12-en-28-oic acid (3-Epiursolic acid)*	Terpenoids	Triterpene	C30H48O3	455.36	455.36	456.36	[M-H]-	3	989-30-0	-	2.44732e+06	2.18139e+06	2.05522e+06	3.36976e+06	3.62856e+06	3.20069e+06	505466	469296	454056	-	-	-
Lmdn003868	Frehmaglutoside G	Terpenoids	Monoterpenoids	C21H36O9	431.23	161.05	432.236	[M-H]-	3	-	-	110945	148704	61367.1	123407	170973	125933	117420	178771	187258	-	-	-
Lmmn008971	3-Hydroxycycloarta-24-ene-26-oic acid (Isomangiferolic acid)*	Terpenoids	Triterpene	C30H48O3	455.35	455.35	456.36	[M-H]-	3	13878-92-7	-	2.3205e+06	1.98205e+06	2.05924e+06	3.44937e+06	3.56932e+06	3.25802e+06	455466	529751	458613	-	-	-
Ylgn010606	triptonoterpene	Terpenoids	Ditepenoids	C20H28O2	299.2	299.21	300.209	[M-H]-	2	-	-	66968.1	66968.1	66968.1	66968.1	66968.1	66968.1	1.32924e+06	1.01839e+06	1.04176e+06	-	-	-
Hmbn004734	3,23-Dihydroxy-30-noroleana-12,20(29)-dien-28-oic acid (30-Norhederagenin)	Terpenoids	Triterpene	C29H44O4	455.32	455.32	456.324	[M-H]-	2	117654-06-5	-	4.76466e+06	4.25687e+06	4.49033e+06	3.12218e+06	3.39089e+06	3.08744e+06	617488	617488	617488	-	-	-
Zaxn005611	Methyl abieta	Terpenoids	Ditepenoids	C21H32O2	315.2	315.2	316.24	[M-H]-	3	-	-	1.4961e+08	1.34091e+08	1.40574e+08	1.48861e+08	1.44582e+08	1.46731e+08	1.0583e+08	1.08398e+08	1.0284e+08	-	-	-
MWSmce335	Ingenol	Terpenoids	Ditepenoids	C20H28O5	347.18	329.18	348.194	[M-H]-	2	30220-46-3	C09112	4.81741e+06	3.63622e+06	3.937e+06	1.0753e+06	1.27719e+06	1.62803e+06	4.08234e+06	2.97303e+06	3.31086e+06	-	C09112	-
Wdzn010432	5-[2-(furan-3-yl)ethyl]-5,6,8a-trimethyl-3,4,4a,6,7,8-hexahydronaphthalene-1-carboxylic acid	Terpenoids	Ditepenoids	C20H28O3	315.19	255.23	316.204	[M-H]-	3	-	-	1.04892e+06	958176	1.11477e+06	1.14414e+06	1.02983e+06	1.08532e+06	1.32745e+06	1.2801e+06	1.2872e+06	-	-	-
Lmxn004121	Scrophuloside A1	Terpenoids	Terpene	C26H32O12	535.18	373.13	536.189	[M-H]-	3	240819-14-1	-	153790	124908	130384	196575	177336	226996	138014	122531	114117	-	-	-
Lcsn004011	Gibberellin A3	Terpenoids	Ditepenoids	C19H22O6	345.13	257.15	346.142	[M-H]-	3	77-06-5	C01699	99105.3	96492.5	80264.6	539169	501485	454852	296374	310599	283170	ko00904,ko01110	C01699	-
Qazn004045	Jasminoside F-glucoside	Terpenoids	Monoterpenoids	C22H36O13	507.2	345.15	508.216	[M-H]-	3	-	-	343338	240412	232857	46571.4	46571.4	46571.4	250730	310558	487367	-	-	-
Wasyqn3271	Bridelionoside B	Terpenoids	Monoterpenoids	C19H34O9	465.23	243.16	406.22	[M+CH3COO]-	3	-	-	127011	109565	111682	95024.5	64979.3	68644.8	138859	161310	203867	-	-	-
Lmmn009932	3-Hydroxy-24-methylene-9,19-cyclolanostan-26-oic acid (Ambolic acid)*	Terpenoids	Triterpene	C31H50O3	469.37	469.37	470.376	[M-H]-	2	13878-93-8	-	4633.33	4633.33	4633.33	73409.6	71655.2	66061.7	61348.1	68273.7	23166.6	-	-	-
Zmsn002575	Hastatoside	Terpenoids	Monoterpenoids	C17H24O11	403.12	223.07	404.132	[M-H]-	2	50816-24-5	-	165255	112307	183153	22461.4	22461.4	22461.4	151025	122836	245551	-	-	-
MWSHC20176	Betulinic acid*	Terpenoids	Triterpene	C30H48O3	455.35	455.35	456.36	[M-H]-	3	472-15-1	C08619	2.68424e+06	1.91366e+06	2.41813e+06	3.7547e+06	3.77191e+06	3.61061e+06	600656	679842	319230	-	C08619	-
Hmdn006855	3,4-Cycloopen-cycloaltin-4(29),25-diene-24(R)-hydroxy-3-carboxylic acid	Terpenoids	Triterpene	C30H48O3	455.35	455.35	456.36	[M-H]-	3	-	-	188551	165785	176698	260636	315830	238771	114024	127257	115765	-	-	-
Cmbn003318	5-Hydroxy-10-O-(p-methoxycinnamoyl)adoxosidic acid	Terpenoids	Monoterpenoids	C25H30O13	537.16	161.03	538.169	[M-H]-	3	-	-	9520.56	21677.6	21801.4	22959.9	36705.9	29787.3	5488.5	15626.1	19683.3	-	-	-
Zmsn005057	Cornuside	Terpenoids	Monoterpenoids	C24H30O14	541.15	347.08	542.164	[M-H]-	2	131189-57-6	-	945.91	945.91	945.91	19037.6	16196.9	8657.71	13670.1	9643.68	4729.55	-	-	-
Wbkn003794	Yadanzioside E	Terpenoids	Ditepenoids	C32H44O16	683.25	179.06	684.263	[M-H]-	3	95258-20-1	-	7975.45	2064.5	5416.15	10680.5	20340.5	6831.23	412.9	412.9	412.9	-	-	-
Lmmn004459	Ent-15-oxo-2β,16,19-trihydroxypimar-8(14)-ene	Terpenoids	Ditepenoids	C20H32O4	335.22	335.22	336.23	[M-H]-	3	-	-	8.6253e+06	6.50815e+06	7.11761e+06	7.70001e+06	5.31643e+06	7.52862e+06	6.26811e+06	6.35558e+06	6.14112e+06	-	-	-
Lmqn012798	Urs-12(13)-en-3-one-28-oic acid*	Terpenoids	Triterpene	C30H46O3	453.34	453.34	454.345	[M-H]-	1	-	-	4.45287e+06	4.20805e+06	3.8905e+06	6.74524e+06	6.62901e+06	4.15001e+06	1.16171e+06	804583	759555	-	-	-
Lmxn002084	Dihydrocatalpol	Terpenoids	Terpene	C15H24O10	363.13	183.07	364.137	[M-H]-	3	6736-86-3	-	42881	20685.6	57214.1	4137.12	4137.12	4137.12	4137.12	4137.12	4137.12	-	-	-
Lmdn003075	3,4-Dihydroverbenalin	Terpenoids	Monoterpenoids	C17H26O10	389.15	167.07	390.153	[M-H]-	2	-	-	16929.9	51150.1	29658.7	42536.2	28536.2	9946.32	1989.26	1989.26	1989.26	-	-	-
Zbbn005427	10-O-(3-Methylferuloyl)-geniposide	Terpenoids	Monoterpenoids	C27H32O13	563.18	357.14	564.184	[M-H]-	3	-	-	347.81	347.81	347.81	7753.68	15688.7	6273.74	1739.05	3578.12	5062.29	-	-	-
Wafn003834	Hydroxygeranyl 6-O-xylopyranosyl-glucopyranoside	Terpenoids	Monoterpenoids	C21H36O11	463.22	331.18	464.226	[M-H]-	3	-	-	150219	117438	71255.1	14251	14251	14251	14251	14251	14251	-	-	-
pmn001703	19-Hydroxy-2-(hydroxymethyl)-A(1)-norursa-2,12-dien-28-oic acid (Hyptadienic acid)	Terpenoids	Triterpene	C30H46O4	469.33	433.31	470.34	[M-H]-	1	128397-09-1	-	86866.8	75608.9	84371.7	169897	153045	157453	9312.45	8096.2	11273	-	-	-
Ydyn013925	Methyl oleanolate*	Terpenoids	Triterpene	C31H50O3	469.37	469.37	470.376	[M-H]-	2	1724-17-0	-	15838.8	15838.8	15838.8	79193.8	154104	99548	15838.8	15838.8	15838.8	-	-	-
Smln009639	inumakiol G	Terpenoids	Ditepenoids	C20H26O4	329.17	285.18	330.183	[M-H]-	2	-	-	4.20995e+06	4.34347e+06	4.72425e+06	3.20953e+06	3.19261e+06	3.13796e+06	3.70606e+06	3.84097e+06	3.38845e+06	-	-	-
Zaxn005783	Methyl neoabietate	Terpenoids	Ditepenoids	C21H32O2	315.2	315.2	316.24	[M-H]-	3	3310-97-2	-	3.16334e+07	3.12255e+07	3.02807e+07	4.7466e+07	4.62741e+07	4.56856e+07	3.39457e+07	3.44642e+07	3.36309e+07	-	-	-
Lmjn003127	Euphorbioside A	Terpenoids	Sesquiterpenoids	C19H32O9	403.2	161.04	404.205	[M-H]-	3	403805-90-3	-	3658.07	3658.07	3658.07	270157	251306	288388	466475	433165	457427	-	-	-
Lmmn009550	3-Oxo-9,19-cyclolanost-24-en-26-oic acid (Mangiferonic acid)*	Terpenoids	Triterpene	C30H46O3	453.34	453.34	454.345	[M-H]-	1	13878-90-5	-	5.39982e+06	4.24093e+06	4.04729e+06	6.69839e+06	8.26462e+06	5.73909e+06	849799	1.048e+06	777320	-	-	-
Zmcn009787	23-Hydroxy-3-oxoolean-12-en-28-oic acid (Hederagonic acid)	Terpenoids	Triterpene	C30H46O4	469.33	439.32	470.34	[M-H]-	1	466-01-3	-	72589.1	65312.5	68007.4	127831	131320	139327	1014.35	1014.35	1014.35	-	-	-
Wasn005224	Hydroxygeranylmalonyl glucose	Terpenoids	Monoterpenoids	C19H30O10	417.18	331.18	418.184	[M-H]-	3	-	-	689309	713280	769093	641113	508723	583115	840543	938422	934408	-	-	-
Lcsn000648	ent-3α,16β,17,19-Tetrahydroxykauran-19-ylacetate-17-O-β-D-glucopyranoside	Terpenoids	Ditepenoids	C28H46O10	541.3	481.28	542.309	[M-H]-	3	-	-	27732	10655.2	11041.8	84375.3	85049.7	50687.4	37333.5	35499.2	13996.5	-	-	-
Wasn006047	Glucosyl 10,11-dihydroxy-2,6-farneSadienoate	Terpenoids	Sesquiterpenoids	C21H36O9	431.23	251.17	432.236	[M-H]-	1	-	-	16773.8	16773.8	16773.8	286872	322080	281957	16773.8	16773.8	16773.8	-	-	-
Lmzn006284	2-Hydroxyursolic acid	Terpenoids	Triterpene	C30H48O4	471.35	471.35	472.355	[M-H]-	2	-	-	198546	198546	198546	198546	198546	198546	2.71094e+06	2.91788e+06	3.06724e+06	-	-	-
MWSmce134	3-Oxolup-20(29)-en-28-oic acid (Betulonic acid)*	Terpenoids	Triterpene	C30H46O3	453.35	453.35	454.345	[M-H]-	1	4481-62-3	-	4.50219e+06	3.75178e+06	3.98836e+06	5.03238e+06	5.36305e+06	4.38013e+06	774632	814529	697857	-	-	-
Hmyn009418	Nootkatone-11,12-diol	Terpenoids	Sesquiterpenoids	C15H24O3	251.17	163.11	252.173	[M-H]-	3	-	-	23199.5	25083.5	35849	32553.6	27214.6	36689.9	18172.8	25466	4848.87	-	-	-
MWSslk186	8-O-Acetylharpagide	Terpenoids	Monoterpenoids	C17H26O11	405.14	165.06	406.147	[M-H]-	3	6926-14-3	-	50907	15987	45524.6	2681.67	2681.67	2681.67	2681.67	2681.67	2681.67	-	-	-
Ylyn012389	celastolide	Terpenoids	Triterpene	C30H46O5	485.32	485.32	486.334	[M-H]-	2	-	-	1.31219e+07	1.08416e+07	1.25944e+07	1.37498e+07	1.35073e+07	1.37783e+07	4.25722e+06	1.43704e+06	1.44005e+06	-	-	-
Waptp02666	Procyanidin B5*	Tannins	Proanthocyanidins	C30H26O12	579.15	127.04	578.142	[M+H]+	1	12798-57-1	-	623027	967042	619259	563930	744857	683794	983750	914527	780936	-	-	-
Waptp02966	Procyanidin B6*	Tannins	Proanthocyanidins	C30H26O12	579.15	127.04	578.142	[M+H]+	1	12798-58-2	-	585087	667159	638099	791086	771150	590271	842888	1.17441e+06	784843	-	-	-
Lmsp005625	3-O-Methylellagic acid-4'-O-(5''-O-acetyl)arabinoside	Tannins	Tannin	C22H18O13	491.08	317.03	490.075	[M+H]+	3	-	-	262369	234346	321311	154128	155567	243946	225503	266542	231091	-	-	-
pmp000100	Arecatannin B1	Tannins	Tannin	C45H38O18	867.21	715.16	866.206	[M+H]+	3	79763-28-3	C17892	5.93792e+06	1.22618e+07	1.72531e+07	1.06404e+07	1.06992e+07	1.27887e+07	2.45123e+07	9.39985e+06	1.39247e+07	-	C17892	-
pmp000101	Arecatannin C1	Tannins	Tannin	C45H38O18	867.21	715.17	866.206	[M+H]+	3	87727-69-3	C17897	1.05627e+07	9.19935e+06	9.35986e+06	6.41074e+06	1.05971e+07	3.97925e+06	7.5635e+06	1.82382e+07	1.88386e+07	-	C17897	-
Lajp002810	Procyanidin A4	Tannins	Proanthocyanidins	C30H24O13	593.13	287.06	592.122	[M+H]+	2	111466-29-6	-	215697	215697	215697	1.07849e+06	1.71896e+06	1.55086e+06	1.87473e+06	1.16842e+06	1.36747e+06	-	-	-
Lmsp004521	1-O-Cinnamoyl-4,6-(S)-HHDP-β-D-glucose	Tannins	Tannin	C29H24O15	613.12	147.04	612.111	[M+H]+	3	-	-	62443.4	56795.9	37984	67613.1	141567	70818.5	103396	36337.7	61266.1	-	-	-
Zmlp007578	3,4,3'-Tri-O-methylellagic acid	Tannins	Tannin	C17H12O8	345.06	313.03	344.053	[M+H]+	3	1617-49-8	C10836	236268	184077	141434	28286.8	28286.8	28286.8	328388	206255	182529	-	C10836	-
pmp000273	Gambiriin B3	Tannins	Tannin	C30H26O11	563.15	139.04	562.148	[M+H]+	3	76236-90-3	C17777	255271	272360	229730	437973	422456	338282	408456	379509	385973	-	C17777	-
Waptp03252	Procyanidin B7	Tannins	Proanthocyanidins	C30H26O12	579.15	127.04	578.142	[M+H]+	1	-	-	119468	199787	223774	13378.9	13378.9	13378.9	291213	145016	199019	-	-	-
MWSHY0171	Procyanidin B2	Tannins	Proanthocyanidins	C30H26O12	579.15	409.09	578.142	[M+H]+	2	29106-49-8	C17639	7.40974e+07	6.59584e+07	6.75711e+07	1.31001e+08	1.21982e+08	1.17653e+08	1.083e+08	1.31579e+08	1.32867e+08	-	C17639	-
Zmlp005019	3,3'-O-Dimethylellagic Acid-4'-O-arabinoside	Tannins	Tannin	C21H18O12	463.09	331.05	462.08	[M+H]+	3	-	-	7.86927e+06	8.35302e+06	7.41972e+06	5.8214e+06	6.10022e+06	6.13189e+06	9.61928e+06	8.70305e+06	9.20368e+06	-	-	-
Lhfp110807	Petasiphenol	Tannins	Tannin	C18H16O7	345.1	163.04	344.09	[M+H]+	3	145904-50-3	-	198792	168797	140361	162553	196630	242959	28072.3	28072.3	28072.3	-	-	-
mws0836	Procyanidin B1	Tannins	Proanthocyanidins	C30H26O12	577.14	425.09	578.142	[M-H]-	1	20315-25-7	-	3.48367e+06	1.80947e+06	2.39517e+06	2.16061e+06	2.71073e+06	2.96533e+06	2.91125e+06	2.71295e+06	3.22623e+06	-	CM01807	MetMap140,MetMap141
Waqkn02083	Epigallocatechin-(4β→8)-catechin	Tannins	Proanthocyanidins	C30H26O13	593.13	407.08	594.137	[M-H]-	2	-	-	69699.6	46328	80066.3	160519	119791	107554	49628.9	67566.5	43687.3	-	-	-
HJN074	Procyanidin A6	Tannins	Proanthocyanidins	C31H28O12	591.15	289.07	592.158	[M-H]-	3	-	-	756467	744211	664488	1.80425e+06	1.77853e+06	1.57955e+06	1.22586e+06	1.1473e+06	1.20429e+06	-	-	-
Wayn005368	3,3'-Di-O-Methylellagic acid 4'-glucoside	Tannins	Tannin	C22H20O13	491.08	329.03	492.09	[M-H]-	3	51803-68-0	-	1.56905e+06	2.29643e+06	1.45709e+06	1.65224e+06	1.75186e+06	1.67462e+06	515028	641898	585090	-	-	-
Wacyn02228	Theasinensin E*	Tannins	Proanthocyanidins	C30H26O14	609.13	423.07	610.132	[M-H]-	2	-	-	1.84206e+06	1.28121e+06	1.19484e+06	4.02399e+06	2.61237e+06	4.18476e+06	1.47084e+06	1.1825e+06	1.11084e+06	-	-	-
pme0436	Procyanidin B3	Tannins	Proanthocyanidins	C30H26O12	577.14	407.08	578.142	[M-H]-	1	23567-23-9	-	1.92272e+06	1.90511e+06	1.57093e+06	2.02265e+06	2.04194e+06	2.15587e+06	2.68036e+06	3.01536e+06	2.96285e+06	-	CM01808	MetMap140
pmn001647	Procyanidin C2	Tannins	Proanthocyanidins	C45H38O18	865.2	713.16	866.206	[M-H]-	1	37064-31-6	-	1.07813e+07	1.05675e+07	1.16347e+07	1.08652e+07	1.207e+07	1.1577e+07	1.53569e+07	1.14548e+07	1.66289e+07	-	CM01815	MetMap140
pmn001646	Procyanidin C1	Tannins	Proanthocyanidins	C45H38O18	865.2	577.14	866.206	[M-H]-	1	37064-30-5	C17624	9.99401e+06	1.3146e+07	1.25794e+07	1.2951e+07	1.41112e+07	1.51047e+07	1.35822e+07	1.43252e+07	1.52822e+07	-	C17624	MetMap141
ZBN0419	Gambiriin A1	Tannins	Tannin	C30H28O12	579.15	289.07	580.158	[M-H]-	3	76250-49-2	C17772	3.46717e+06	4.4735e+06	3.70467e+06	6.05191e+06	6.11121e+06	6.22025e+06	5.05648e+06	5.51269e+06	5.92872e+06	-	C17772	-
pmn001649	Cinnamtannin A2	Tannins	Tannin	C60H50O24	1153.26	1001.21	1154.27	[M-H]-	3	86631-38-1	C17625	1.70935e+06	1.05361e+06	1.39475e+06	1.75303e+06	1.85954e+06	1.04748e+06	2.19834e+06	1.78708e+06	2.4079e+06	-	C17625	-
Waqkn01592	Gallocatechin-(4α→8)-epigallocatechin*	Tannins	Proanthocyanidins	C30H26O14	609.13	423.07	610.132	[M-H]-	2	68964-95-4	-	1.8505e+06	1.50125e+06	1.52865e+06	3.99615e+06	3.60923e+06	4.72574e+06	1.36906e+06	1.31091e+06	1.59001e+06	-	-	-
pmn001667	Procyanidin B4	Tannins	Proanthocyanidins	C30H26O12	577.14	407.08	578.142	[M-H]-	2	29106-51-2	C10238	4.40247e+06	3.2168e+06	3.94926e+06	5.39806e+06	5.62865e+06	5.16433e+06	4.50197e+06	6.96171e+06	4.63809e+06	-	C10238	MetMap140,MetMap141
pme2246	Ellagic acid	Tannins	Tannin	C14H6O8	301	185.02	302.006	[M-H]-	3	476-66-4	C10788	38516.7	41214.5	39760.8	33695.6	22495.8	13940.8	35989.8	32842	34611.7	-	C10788	-
Lmhn002379	Strictinin	Tannins	Tannin	C27H22O18	633.07	301	634.081	[M-H]-	3	517-46-4	-	1191.4	1191.4	1191.4	1191.4	1191.4	1191.4	42659.7	73064.8	40281.8	-	-	-
WaQzp09970	Estrane-3,17-diol	Steroids	Steroid	C18H30O2	279.23	67.05	278.225	[M+H]+	3	517-01-1	-	2.07571e+06	1.9114e+06	2.1122e+06	3.45555e+06	3.78841e+06	4.41101e+06	1.52153e+06	1.3861e+06	1.7057e+06	-	-	-
Lskp211409	20,26-Dihydroxyecdysone*	Steroids	Steroid	C27H44O8	497.31	335.26	496.304	[M+H]+	2	19458-46-9	C16500	219915	93418.2	212620	129800	116039	108425	24362.8	39473.1	41510	-	C16500	-
Lhmp122112	5-Pregnene-3,17,20-triol-20-O-glucoside*	Steroids	Cardiac glycoside	C27H44O8	497.31	335.26	496.304	[M+H]+	2	-	-	153114	146605	259299	153298	131388	123899	43462.9	17535.3	32972.5	-	-	-
Yalp007434	(3R,5R,7R,8R,9R,10S,13S,17R)-17-((3S,6S)-6-hydroxy-7,7-dimethyl-2,3,6,7-tetrahydrooxepin-3-yl)-4,4,8,10,13-pentamethyl-2,3,4,5,6,7,8,9,10,11,12,13,16,17-tetradecahydro-1H-cyclopenta[a]phenanthrene-3,7-diyl diacetate	Steroids	Steroid	C34H52O6	557.38	465.34	556.376	[M+H]+	3	-	-	44222.3	38280.7	64447.8	3791.53	3791.53	3791.53	18957.7	26565.7	51230.8	-	-	-
Lsj214142	9-hydroxy-2,3-dimethoxy-1,4-anthraquinone	Quinones	Anthraquinone	C16H12O5	285.076	239.07	284.068	[M+H]+	3	184652-26-4	-	5.59103e+06	4.43286e+06	4.34289e+06	3.9766e+06	4.43678e+06	3.96706e+06	4.60877e+06	3.42109e+06	3.91572e+06	-	-	-
Lsj214144	10-hydroxy-2-hydroxymethyl-1,4-anthraquinone*	Quinones	Anthraquinone	C15H10O4	255.064	240.042	254.058	[M+H]+	3	-	-	3.59479e+07	3.59964e+07	3.37875e+07	2.38816e+07	3.05091e+07	2.60261e+07	2.62251e+07	3.12531e+07	2.22362e+07	-	-	-
Walbp06373	2-Ethynyl-5-methoxybenzo-1,4-quinone	Quinones	Quinones	C9H6O3	163.04	77.04	162.032	[M+H]+	3	82511-23-7	-	1.37001e+07	1.29964e+07	1.33184e+07	1.41373e+07	1.47027e+07	1.4068e+07	1.39662e+07	1.47342e+07	1.46706e+07	-	-	-
Zmjp005262	2-Hydroxyl emodin-1-methyl ether	Quinones	Anthraquinone	C16H12O6	301.071	258.054	300.063	[M+H]+	3	346434-45-5	-	248909	204418	162033	1.02654e+06	1.0587e+06	1.08911e+06	158667	147491	147908	-	-	-
MWSHC2040	Alizarin 1-methyl ether*	Quinones	Anthraquinone	C15H10O4	255.066	240.044	254.058	[M+H]+	3	6170-06-5	-	3.58228e+07	3.18237e+07	2.81812e+07	2.17926e+07	2.56303e+07	2.00218e+07	1.76672e+07	2.53354e+07	1.81469e+07	-	-	-
MWS1872	Hydroxyanthraquinone	Quinones	Anthraquinone	C14H8O3	225.05	105.03	224.047	[M+H]+	3	129-43-1	C02980	1.21423e+06	1.13425e+06	1.14879e+06	2.44051e+06	2.59213e+06	2.59913e+06	2.14242e+06	1.95954e+06	2.24374e+06	-	C02980	-
Lmyp007641	Rubiadin	Quinones	Anthraquinone	C15H10O4	255.07	227.07	254.058	[M+H]+	3	117-02-2	C10402	2.65366e+07	3.16112e+07	2.98999e+07	2.18215e+07	2.9816e+07	2.16169e+07	2.24557e+07	2.04519e+07	1.6732e+07	-	C10402	-
Lmyp008281	2-Methylquinizarin	Quinones	Anthraquinone	C15H10O4	255.065	227.075	254.058	[M+H]+	3	-	-	1.48262e+07	1.34672e+07	8.35975e+06	9.58712e+06	8.89563e+06	9.41315e+06	1.05919e+07	1.14258e+07	7.9522e+06	-	-	-
Wmhp000055	2,5-Dimethoxybenzoquinone*	Quinones	Quinones	C8H8O4	169.05	65.04	168.042	[M+H]+	1	3117-03-1	-	204091	560831	740144	474731	149611	492019	231148	240536	196086	-	-	-
Zmsp001834	2,6-Dimethoxybenzoquinone*	Quinones	Quinones	C8H8O4	169.05	65	168.042	[M+H]+	1	530-55-2	C10331	686346	636501	673001	559555	547623	611103	709239	579678	629313	-	C10331	-
Zbsp003376	Isoshinanolone	Quinones	Quinones	C11H12O3	193.09	147.08	192.079	[M+H]+	2	39626-91-0	C12343	5.38971e+07	3.7276e+07	4.98952e+07	2.69504e+07	3.719e+07	3.07452e+07	5.12922e+07	5.25185e+07	3.87257e+07	-	C12343	-
Wasdp05932	5,8-dimethoxy-3-methylnaphthalen-1-ol	Quinones	Quinones	C13H14O3	219.1	189.09	218.094	[M+H]+	3	50559-08-5	-	2.75245e+06	2.65172e+06	2.9525e+06	3.99206e+06	3.60817e+06	3.94205e+06	3.47525e+06	3.61377e+06	3.95066e+06	-	-	-
Wasyqp2936	2-prop-2-ynylcyclohexa-2,5-diene-1,4-dione	Quinones	Quinones	C9H6O2	147.04	119.05	146.037	[M+H]+	1	-	-	4.29928e+06	4.37673e+06	3.82335e+06	5.30585e+06	4.17897e+06	4.66727e+06	3.68523e+06	3.05404e+06	3.8532e+06	-	-	-
Wbjp005910	peganoneⅠ	Quinones	Anthraquinone	C16H12O5	285.07	285.07	284.068	[M+H]+	3	-	-	7.54725e+06	7.51834e+06	7.82562e+06	6.27235e+06	8.55362e+06	6.53971e+06	7.89065e+06	7.10225e+06	6.44175e+06	-	-	-
Lmyp008134	5-Hydroxy-2-methyl anthraquinone	Quinones	Anthraquinone	C15H10O3	239.07	211.08	238.063	[M+H]+	3	68963-22-4	-	37562.9	37562.9	37562.9	498928	349242	187814	241332	286527	312460	-	-	-
Sakp009244	Dunnione	Quinones	Quinones	C15H14O3	243.1	159.04	242.094	[M+H]+	3	33404-57-8	C10337	955538	700894	769476	1.22592e+06	1.43687e+06	1.35892e+06	724728	819635	783055	-	C10337	-
Wbmp007855	Oxoflaccidin	Quinones	PhenAnthraquinones	C16H12O5	285.08	242.06	284.068	[M+H]+	1	-	-	335393	269063	265664	1.34616e+06	1.58219e+06	1.47334e+06	181119	68585.6	212261	-	-	-
Lsj214143	Soranjidiol; 1,6-Dihydroxy-2-methyl-9,10-anthraquinone	Quinones	Anthraquinone	C15H10O4	255.06	209.06	254.058	[M+H]+	2	518-73-0	-	2.00147e+06	2.44774e+06	2.11915e+06	8.73391e+06	8.99307e+06	9.172e+06	652508	586367	512702	-	-	-
pmp000608	Aurantio-obtusin beta-D-glucoside	Quinones	Anthraquinone	C23H24O12	493.13	331.08	492.127	[M+H]+	1	129025-96-3	C10303	85956.7	52714	39556.4	115755	131139	196716	86532.2	20572.5	15132.7	-	C10303	-
Lmsp102504	Chrysophanol-8-O-β-D-galactoside*	Quinones	Anthraquinone	C21H20O9	417.118	255.061	416.111	[M+H]+	2	-	-	238698	194159	180660	235072	116356	280873	332353	164838	214804	-	-	-
Lmsp102505	Chrysophanol 8-O-beta-D-glucoside*	Quinones	Anthraquinone	C21H20O9	417.12	255.06	416.111	[M+H]+	2	13241-28-6	C10316	238698	194159	180660	235072	116356	280873	332353	164838	214804	-	C10316	-
Zmtp102902	α-Hydrojuglone glucoside	Quinones	Quinones	C16H18O8	339.11	177.05	338.1	[M+H]+	3	-	-	2.67087e+06	3.06368e+06	2.70761e+06	3.66563e+06	4.57463e+06	3.51505e+06	3.82585e+06	4.21981e+06	3.29268e+06	-	-	-
Wbtp005759	1,2,5,7,8-pentahydroxy-3-methylanthracene-9,10-dione	Quinones	Quinones	C15H10O7	303.05	303.05	302.043	[M+H]+	1	-	-	3.32291e+06	3.32291e+06	3.32291e+06	1.66146e+07	2.20087e+07	1.83077e+07	3.32291e+06	3.32291e+06	3.32291e+06	-	-	-
Lhfp112915	Dihydrojuglone	Quinones	Quinones	C10H8O3	177.05	131.05	176.047	[M+H]+	3	-	-	2.79522e+06	2.61595e+06	2.9219e+06	6.41422e+06	7.51286e+06	6.54901e+06	8.13886e+06	8.56864e+06	7.66582e+06	-	-	-
Wbmp005699	Oxoflaccidin-glucose	Quinones	PhenAnthraquinones	C22H22O10	447.13	285.08	446.121	[M+H]+	3	-	-	966936	969011	367942	631291	651308	570157	881398	855468	887873	-	-	-
Lhfp112910	6-hydroxy-isosclerone	Quinones	Quinones	C10H10O4	195.06	131.05	194.058	[M+H]+	3	-	-	175703	149196	64755.3	12951.1	12951.1	12951.1	12951.1	12951.1	12951.1	-	-	-
Smnp004764	7-hydroxyaloin	Quinones	Anthraquinone	C21H22O10	435.12	255.06	434.121	[M+H]+	3	82461-12-9	-	220243	101521	137285	264892	71640.2	245548	217368	40827.1	98282.5	-	-	-
pmp000607	1-desmethylaurantio-obtusin-2-O-β-D-glucoside	Quinones	Anthraquinone	C22H22O12	479.12	317.06	478.111	[M+H]+	3	-	-	122251	122251	122251	122251	122251	122251	5.58908e+06	3.47029e+06	611254	-	-	-
Zbzn008048	Embelin	Quinones	Quinones	C17H26O4	293.18	221.15	294.183	[M-H]-	1	550-24-3	C10342	702715	695361	449917	291263	310775	244671	915043	1.01928e+06	839083	-	C10342	-
Zmdn006929	Aloe-Emodin-9-Anthrone	Quinones	Anthraquinone	C15H12O4	255.07	213.06	256.074	[M-H]-	1	6247-99-0	C16760	231541	260363	269719	407688	424155	424375	148816	138716	173003	-	C16760	-
Wmjn000304	1-HydroxyialibinoA	Quinones	PhenAnthraquinones	C21H30O5	361.2	233.08	362.209	[M-H]-	3	-	-	60357.7	48423.6	46748	17944.2	31657.2	24512.8	107487	62762	73410.4	-	-	-
Zmdn007287	Rhein-9-Anthrone	Quinones	Anthraquinone	C15H10O5	269.05	241.05	270.053	[M-H]-	3	480-09-1	-	173462	167678	150274	819153	801367	825563	162956	155694	236700	-	-	-
mws1659	Emodin	Quinones	Anthraquinone	C15H10O5	269.05	225.06	270.053	[M-H]-	3	518-82-1	C10343	15490.7	17261.1	14167.2	57535.3	52586.4	48155.9	12282.3	20424.1	16155.5	-	C10343	-
Zbn010259	1,5,7-trihydroxy-6-methoxy-2-methoxymethylanthraquinone	Quinones	Anthraquinone	C17H14O7	329.07	314.05	330.074	[M-H]-	3	-	-	743820	808660	716143	2.16941e+06	2.11254e+06	2.13814e+06	612385	578623	620022	-	-	-
Zmdn006903	6-Methylaloe emodin	Quinones	Anthraquinone	C16H12O5	283.06	240.04	284.068	[M-H]-	3	873431-39-1	-	25599.2	24729.4	34220.7	97984.8	102392	105150	19652	34202.1	19294.9	-	-	-
Zahn004036	2,3-Dihydro-1,4-naphthoquinone	Quinones	Quinones	C10H8O2	159.04	115.05	160.052	[M-H]-	3	21545-31-3	-	132834	60508.3	110686	239840	208614	290937	213024	267642	195975	-	-	-
Cmsn006847	2-methoxy-9,10-dihydrophenanthrene-4,5-diol	Quinones	PhenAnthraquinones	C15H14O3	241.09	226.06	242.094	[M-H]-	1	70205-50-4	-	1.38195e+06	1.6449e+06	1.71765e+06	1.66026e+06	1.6651e+06	1.72078e+06	661239	688533	737068	-	-	-
Zmfn007793	2,3-dihydroxy-7-methoxy-9,10-dihydro-phenanthrene	Quinones	PhenAnthraquinones	C15H14O3	241.09	198.07	242.094	[M-H]-	1	-	-	825007	974745	1.06841e+06	957576	997261	1.03841e+06	372673	373582	387813	-	-	-
Lmqn003292	4,5,8-Trihydroxy-α-tetralone-5-O-glucoside	Quinones	Naphthol	C16H20O9	355.1	193.05	356.111	[M-H]-	3	-	-	5.31109e+06	5.54133e+06	5.64753e+06	4.72836e+06	5.18263e+06	5.17907e+06	1.86713e+06	1.84836e+06	2.04229e+06	-	-	-
Wmhn004393	1,4,8-Trihydroxynaphthalene-1-O-[6'-O-(4''-propionyloxybenzoyl)]glucoside	Quinones	Quinones	C26H26O11	513.14	351.08	514.148	[M-H]-	2	-	-	2.4367e+06	1.93243e+06	2.37986e+06	1.76834e+06	2.4775e+06	3.1404e+06	2.46653e+06	3.04216e+06	2.45943e+06	-	-	-
Zbln008373	2,7-dihydroxy-3,4,6-methoxyphenanthrene	Quinones	PhenAnthraquinones	C17H16O5	299.09	173.06	300.1	[M-H]-	3	-	-	123353	131770	142853	142000	156225	140617	74324.7	73630.8	84164.5	-	-	-
Zmhn001905	HydroxyAloe-emodin-8-O-glucoside	Quinones	Anthraquinone	C21H20O11	447.09	285.04	448.101	[M-H]-	1	-	-	1.15758e+06	990305	1.00236e+06	968713	836203	710536	3.62362e+06	3.22876e+06	3.6625e+06	-	-	-
Zmdn007764	isoemodin	Quinones	Anthraquinone	C15H10O5	269.05	225.06	270.053	[M-H]-	3	-	-	84435.4	81531.9	68255.6	355467	351590	376056	85031	67443.9	108092	-	-	-
Zjbn102537	Coelonin*	Quinones	PhenAnthraquinones	C15H14O3	241.09	226.06	242.094	[M-H]-	3	-	-	246119	269463	235078	239962	255687	252648	158698	125154	137650	-	-	-
Zbln007359	2,7-dihydroxy-4-methoxyphenanthrene	Quinones	PhenAnthraquinones	C15H12O3	239.07	196.05	240.079	[M-H]-	3	130827-45-1	-	43812.9	29924.8	41987.8	53022	59492.6	50614.6	17139.5	15724.3	24927.6	-	-	-
Lmtn005519	Hircinol*	Quinones	PhenAnthraquinones	C15H14O3	241.09	226.06	242.094	[M-H]-	3	41060-05-3	C10261	352495	375007	336685	406482	330304	307557	220088	185770	205721	-	C10261	-
MWStz453	Physcion 8-glucoside	Quinones	Anthraquinone	C22H22O10	445.11	283.06	446.121	[M-H]-	3	23451-01-6	C10384	7686.29	33594.6	14218.4	21973	25825	40219.1	38347.1	24942.4	25284.5	-	C10384	-
Ymln008632	Deoxyerythrolaccin	Quinones	Anthraquinone	C15H10O5	269.04	269.05	270.053	[M-H]-	3	18499-83-7	-	23430.8	23430.8	23430.8	612864	589510	639562	117154	131836	121022	-	-	-
pmn001336	Aloeemodin-8-O-glucoside	Quinones	Anthraquinone	C21H20O10	431.1	269	432.106	[M-H]-	2	33037-46-6	-	570591	928767	600476	2.55026e+06	2.19858e+06	2.26356e+06	484646	513227	493749	-	-	-
Ymln108520	Aloesaponol Ⅲ	Quinones	Quinones	C15H14O4	257.08	257.09	258.089	[M-H]-	3	64284-37-3	-	1.32792e+06	1.26991e+06	1.42947e+06	1.41613e+06	1.38049e+06	1.39752e+06	887366	874504	810307	-	-	-
Zbln010189	orchinol	Quinones	PhenAnthraquinones	C16H16O3	255.1	225.06	256.11	[M-H]-	3	41060-20-2	C10272	48178.7	50159.9	67579.7	63369.5	58243.6	69118.6	211870	207554	213517	-	C10272	-
Zmdn004052	Aloe emodin-1-O-glucoside	Quinones	Anthraquinone	C21H20O10	431.1	269.05	432.106	[M-H]-	2	266997-58-4	-	106820	102434	143471	20486.8	20486.8	20486.8	20486.8	20486.8	20486.8	-	-	-
Zmdn005541	Emodin-6-O-glucoside	Quinones	Anthraquinone	C21H20O10	431.1	269.05	432.106	[M-H]-	2	34298-85-6	-	207473	228063	171639	331321	320941	252754	125860	141768	199675	-	-	-
pmn001338	Rhein-8-O-glucoside	Quinones	Anthraquinone	C21H18O11	445.08	283	446.085	[M-H]-	2	34298-86-7	-	39215.5	45250.4	34194.5	6838.9	6838.9	6838.9	6838.9	6838.9	6838.9	-	-	-
MWStz690	Rapanone	Quinones	Quinones	C19H30O4	321.21	293.21	322.214	[M-H]-	1	573-40-0	C10399	6983.45	11720	9353.87	5642.61	7825.53	9820.38	1128.52	1128.52	1128.52	-	C10399	-
mws1503	Cinnamaldehyde	Phenolic acids	Phenolic acids	C9H8O	133.06	115.05	132.058	[M+H]+	3	14371-10-9	C00903	1.43103e+06	954106	1.10403e+06	1.27332e+06	1.35215e+06	1.5033e+06	1.28935e+06	1.74838e+06	1.27931e+06	ko00940,ko01100,ko01110	C00903	-
WaTKp12290	2-Ethylidene-5-phenylpentanoic acid	Phenolic acids	Phenolic acids	C13H16O2	205.12	131.08	204.115	[M+H]+	2	-	-	1.55206e+07	1.49849e+07	1.56593e+07	1.07888e+07	1.18668e+07	1.13765e+07	1.45581e+07	1.59286e+07	1.65467e+07	-	-	-
Cmsp008043	Dihydropinosylvin methyl ether*	Phenolic acids	Phenolic acids	C15H16O2	229.12	105.07	228.115	[M+H]+	1	17635-59-5	-	2.39231e+07	2.44595e+07	2.78142e+07	4.07173e+07	4.03166e+07	4.25848e+07	1.34447e+07	1.8535e+07	1.93774e+07	-	CM020253	MetMap152
Wasyqp3073	p-Coumaroyl Aminogalactitol	Phenolic acids	Phenolic acids	C15H21NO8	344.13	147.04	343.127	[M+H]+	3	-	-	2.89708e+06	1.52784e+06	2.09823e+06	1.3135e+06	1.32053e+06	3.1898e+06	2.19492e+06	1.58095e+06	1.89131e+06	-	-	-
Wacyp09192	2,5-O-Di-CinnamylSorbitol	Phenolic acids	Phenolic acids	C24H30O6	415.21	119.09	414.204	[M+H]+	1	-	-	764217	631787	775391	625482	650635	1.08266e+06	992177	1.57059e+06	825587	-	-	-
Wdtp004683	3,4,5-Trihydroxy-6-[1-(4-methoxyphenyl)-4-methylpentan-3-yl]oxyoxane-2-carboxylic acid	Phenolic acids	Phenolic acids	C19H28O8	385.18	149.07	384.178	[M+H]+	2	-	-	398908	521006	415738	369388	342600	342392	368447	620771	363965	-	-	-
Lcfp043780	eurycorymboside A	Phenolic acids	Phenolic acids	C15H18O8	327.11	147.04	326.1	[M+H]+	3	-	-	506829	411032	432772	316421	247834	255057	217538	208094	248155	-	-	-
Layp008066	3-Methoxy-5-(2-phenylethyl)phenol*	Phenolic acids	Phenolic acids	C15H16O2	229.12	105.07	228.115	[M+H]+	1	-	-	2.05134e+07	1.9565e+07	2.14383e+07	3.60422e+07	3.12167e+07	3.36201e+07	1.19564e+07	1.41044e+07	1.61304e+07	-	-	-
MWSslk228	2-methoxycinnamaldehyde	Phenolic acids	Phenolic acids	C10H10O2	163.08	57.07	162.068	[M+H]+	3	1504-74-1	-	240511	209960	226944	297321	323608	284411	438040	285590	300775	-	-	-
MWS1830	Ethylsalicylate	Phenolic acids	Phenolic acids	C9H10O3	167.07	121.03	166.063	[M+H]+	3	118-61-6	-	2.16362e+06	2.02745e+06	4.16512e+06	6.81108e+06	1.03312e+07	5.99829e+06	4.58852e+06	7.65944e+06	3.88762e+06	-	CM020389	MetMap158
pmp000791	Moracin Y	Phenolic acids	Phenolic acids	C15H10O5	271.06	153.05	270.053	[M+H]+	3	1252581-54-6	-	1.42881e+06	1.61712e+06	1.65161e+06	9.71619e+06	1.08249e+07	1.04339e+07	1.32097e+06	1.55617e+06	1.52489e+06	-	-	-
Lmcp101905	Martynoside	Phenolic acids	Phenolic acids	C31H40O15	653.245	177.053	652.237	[M+H]+	3	67884-12-2	-	228467	250014	241892	214027	226535	215091	145257	226051	139676	-	-	-
Zbyp002402	methylarbutin*	Phenolic acids	Phenolic acids	C13H18O7	287.11	107.05	286.104	[M+H]+	2	6032-32-2	C17599	350467	423889	405471	396711	264732	316983	359718	446497	365891	-	C17599	-
Haxp007330	4-Methoxycinnamic acid	Phenolic acids	Phenolic acids	C10H10O3	179.06	135.01	178.063	[M+H]+	3	830-09-1	-	315862	356913	344753	251707	395240	313156	246009	417540	392555	-	-	-
Lahp002797	Methyl Orsellinate	Phenolic acids	Phenolic acids	C9H10O4	183.06	123.04	182.058	[M+H]+	3	3187-58-4	-	1.02055e+06	800952	883335	437441	444519	416040	600087	755312	584472	-	CM020523	MetMap157,MetMap158
HJAP044	1-(2,4,5-Trimethoxyphenyl)propan-1-one	Phenolic acids	Phenolic acids	C12H16O4	225.11	167.06	224.105	[M+H]+	3	3904-18-5	-	619790	523888	407475	1.02209e+06	1.38363e+06	860703	879476	1.14884e+06	855762	-	-	-
Lajp003510	Furo(2,3-f)-1,3-bewnzodioxole	Phenolic acids	Phenolic acids	C15H10O5	271.06	149.02	270.053	[M+H]+	3	-	-	2.33436e+06	2.90629e+06	2.39161e+06	2.64124e+06	3.45449e+06	2.63869e+06	3.03075e+06	3.59284e+06	2.57177e+06	-	-	-
Wasyqp3230	4-O-Feruloyl Aminogalactitol	Phenolic acids	Phenolic acids	C16H23NO9	374.15	177.05	373.137	[M+H]+	1	-	-	267458	905675	1.41878e+06	279561	916931	795151	289374	262128	334193	-	-	-
Wacyp04478	4-(2,6-Dihydroxybenzoyl)-3-Formyl-5-Hydroxybenzoic acid	Phenolic acids	Phenolic acids	C15H10O7	303.05	165.02	302.043	[M+H]+	1	127448-92-4	-	6.56314e+06	6.23118e+06	6.47745e+06	6.51392e+06	6.05815e+06	7.04241e+06	6.20786e+06	5.68308e+06	6.4066e+06	-	-	-
MWS1743	alpha-hexylcinnamaldehyde	Phenolic acids	Phenolic acids	C15H20O	217.16	129.07	216.151	[M+H]+	3	101-86-0	-	1.23338e+06	1.16962e+06	1.35129e+06	1.11833e+06	1.07531e+06	1.20839e+06	1.25728e+06	1.20728e+06	1.3196e+06	-	-	-
Lahp003509	Tadehaginoside	Phenolic acids	Phenolic acids	C21H22O10	435.13	147.04	434.121	[M+H]+	3	-	-	148629	292803	131874	214327	146503	158397	327863	411453	272491	-	-	-
WaTKp08991	4-Phenylhept-6-enoic acid	Phenolic acids	Phenolic acids	C13H16O2	205.12	131.09	204.115	[M+H]+	3	-	-	934665	961863	935337	3.46872e+06	2.77586e+06	3.64339e+06	2.10193e+06	2.06383e+06	2.10855e+06	-	-	-
Safp001733	2-Caffeoylisocitrate	Phenolic acids	Phenolic acids	C15H14O10	355.07	163.04	354.059	[M+H]+	2	-	C02927	193061	166391	143833	272353	227091	276168	124610	225302	24326.6	-	C02927	-
Lmfp006902	Centrolobol	Phenolic acids	Phenolic acids	C19H24O3	301.18	131.05	300.173	[M+H]+	3	30359-01-4	-	2.02252e+07	2.06379e+07	1.61981e+07	1.2775e+07	1.86691e+07	1.36726e+07	2.35407e+07	1.42904e+07	2.07654e+07	-	-	-
Lmxp011770	Diisobutyl phthalate*	Phenolic acids	Phenolic acids	C16H22O4	279.16	149.02	278.152	[M+H]+	3	84-69-5	C15205	397544	479368	554252	253419	308885	278069	322086	416238	225774	-	C15205	MetMap157
Wbmp011762	Dibutylphthalate*	Phenolic acids	Phenolic acids	C16H22O4	279.16	149.02	278.152	[M+H]+	3	-	-	397544	479368	554252	253419	308885	278069	322086	416238	225774	-	-	-
WaTKp18641	Methyl 3-phenylhex-2-enoate	Phenolic acids	Phenolic acids	C13H16O2	205.12	147.12	204.115	[M+H]+	3	1563240-86-7	-	482604	482589	522630	1.61368e+06	1.48947e+06	1.87278e+06	888261	804053	1.16883e+06	-	-	-
Zbsp010780	Methyl [6]-Gingerdiol 5-acetate	Phenolic acids	Phenolic acids	C20H32O5	353.231	151.076	352.225	[M+H]+	3	-	-	284515	388606	318665	191066	181390	152024	25145.3	35886.3	51309.5	-	-	-
WaTKp07606	2-Benzylhex-4-enoic acid	Phenolic acids	Phenolic acids	C13H16O2	205.12	159.12	204.115	[M+H]+	2	-	-	1.72456e+06	1.72405e+06	1.68717e+06	1.3469e+06	1.73158e+06	1.94075e+06	1.54316e+06	1.60414e+06	1.34277e+06	-	-	-
Lazn002158	3,4'-Dihydroxypropiophenone glucoside	Phenolic acids	Phenolic acids	C15H20O8	329.12	121.03	328.116	[M+H]+	1	-	-	118783	102505	62979.2	71655.4	169627	89266.7	116502	297103	78731.1	-	-	-
MWS20201	1-O-Galloyl-beta-D-glucose	Phenolic acids	Phenolic acids	C13H16O10	333.08	171.03	332.074	[M+H]+	3	58511-73-2	C01158	108555	94346.8	132644	829880	782379	685149	83410.1	137261	58143.8	ko00999	C01158	MetMap155
MWS1734	4-Methoxybenzoate	Phenolic acids	Phenolic acids	C8H8O3	153.05	109.06	152.047	[M+H]+	3	100-09-4	C02519	1.1561e+06	1.17044e+06	1.22129e+06	692762	768314	718847	440724	485808	372497	-	C02519	MetMap157
pma3724	1-O-Feruloylquinic acid	Phenolic acids	Phenolic acids	C17H20O9	369.12	177.05	368.111	[M+H]+	3	-	-	167895	144259	204193	69599.2	54770.6	93550.4	141950	116333	56594.4	-	-	-
Zbsp010596	Ethyl-[6]-shogaol	Phenolic acids	Phenolic acids	C19H28O3	305.211	137.06	304.204	[M+H]+	3	-	-	1.58321e+06	1.44927e+06	1.71555e+06	1.10512e+06	1.06369e+06	1.21988e+06	988752	1.01684e+06	871054	-	-	-
Wasyqp2836	3-O-Feruloyl Aminogalactitol	Phenolic acids	Phenolic acids	C16H23NO9	374.14	177.06	373.137	[M+H]+	1	-	-	151404	180834	69635.2	196428	226921	210435	143973	147534	270011	-	-	-
MWSslk149	5-Methoxysalicylic acid	Phenolic acids	Phenolic acids	C8H8O4	169.05	95.05	168.042	[M+H]+	3	2612-02-4	-	438580	881488	462237	541697	717795	757122	356583	345835	276109	-	CM020394	MetMap159
Lmsp004798	3-O-Cinnamoyl-4,6-(S)-HHDP-β-D-glucose	Phenolic acids	Phenolic acids	C29H24O15	613.12	147.04	612.111	[M+H]+	3	-	-	58489.8	51109.5	36325.2	28684.4	78314.8	99548.9	42144.2	38069	53599.8	-	-	-
MWSslk144	p-Coumaric acid ethyl ester	Phenolic acids	Phenolic acids	C11H12O3	193.09	147.04	192.079	[M+H]+	3	7362-39-2	-	5.2404e+06	5.82446e+06	4.87954e+06	7.15506e+06	7.74627e+06	4.18292e+06	4.11079e+06	4.32273e+06	3.44736e+06	-	-	-
MWS1850	2-Phenoxyethanol	Phenolic acids	Phenolic acids	C8H10O2	139.08	56.96	138.068	[M+H]+	3	122-99-6	-	128826	98971.4	89695.8	126716	118110	100755	65898.1	141852	105290	-	-	-
pmb0475	Gallic acid-4-O-(6'''-feruloyl)sophoroside	Phenolic acids	Phenolic acids	C29H34O18	671.18	509	670.174	[M+H]+	2	-	-	136947	177772	180511	307004	285085	170556	175180	160123	115169	-	CM020521	MetMap155
Lcfp039656	Homophthalicacid	Phenolic acids	Phenolic acids	C9H8O4	181.05	135.04	180.042	[M+H]+	1	89-51-0	-	168532	168532	168532	842662	901553	963379	168532	168532	168532	-	-	-
NK10253223	3-Methoxyanthranilate	Phenolic acids	Phenolic acids	C8H9NO3	168.06	94.06	167.058	[M+H]+	3	3177-80-8	C05831	160971	101062	115474	135596	237081	246613	176708	203950	237108	ko00380	C05831	MetMap157
Lmcp101902	Desrhamnosylacteoside	Phenolic acids	Phenolic acids	C23H26O11	479.16	163.04	478.147	[M+H]+	2	-	-	359562	236019	228395	40516.3	40516.3	40516.3	283745	202582	202939	-	-	-
Lmcp101903	Desrhamnosylisoacteoside	Phenolic acids	Phenolic acids	C23H26O11	479.155	163.039	478.147	[M+H]+	3	-	-	359562	236019	228395	40516.3	40516.3	40516.3	283745	202582	202939	-	-	-
Zbsp009834	Methyl-[6]-shogaol methoxy	Phenolic acids	Phenolic acids	C19H28O4	321.207	137.059	320.199	[M+H]+	3	-	-	26294.7	26294.7	26294.7	189587	156982	131474	26294.7	26294.7	26294.7	-	-	-
mws1500	Ethyl cinnamate	Phenolic acids	Phenolic acids	C11H12O2	177.09	131.05	176.084	[M+H]+	3	103-36-6	C06359	480957	445209	517169	89041.8	89041.8	89041.8	538057	635415	586085	-	C06359	-
pmp001125	Dendrobin A	Phenolic acids	Phenolic acids	C16H18O4	275.13	151.08	274.12	[M+H]+	3	-	-	628654	700784	790499	1.40387e+06	1.38397e+06	1.45734e+06	743338	643516	708417	-	-	-
pmb0108	Feruloyl syringic acid	Phenolic acids	Phenolic acids	C19H18O8	375.11	137.1	374.1	[M+H]+	3	-	-	294656	292546	333022	58509.2	58509.2	58509.2	58509.2	58509.2	58509.2	-	CM020545	MetMap156
Wdtp002885	methyl-4,5-diacetyloxy-3-hydroxy-6-[4-(hydroxymethyl)phenoxy]oxane-2-carboxylate	Phenolic acids	Phenolic acids	C18H22O10	399.129	279.086	398.121	[M+H]+	3	-	-	477994	393615	348441	409171	279961	359774	257872	243763	286547	-	-	-
WaTKp17885	2-[4-(2-Methylpropenyl)phenyl]propionic Acid	Phenolic acids	Phenolic acids	C13H16O2	205.12	131.08	204.115	[M+H]+	3	75625-99-9	-	686591	639085	587731	117546	117546	117546	117546	117546	117546	-	-	-
Wahlp01697	Methyl 3-oxo-2-phenylpropanoate	Phenolic acids	Phenolic acids	C10H10O3	179.07	91.05	178.063	[M+H]+	1	5894-79-1	-	1027.67	1027.67	1027.67	14828	5138.36	11560.9	1027.67	1027.67	1027.67	-	-	-
Cmbp005523	1,3-O-Dicaffeoylglycerol	Phenolic acids	Phenolic acids	C21H20O9	417.12	163.04	416.111	[M+H]+	3	-	-	59313.6	45914.7	58677.6	8926.87	8926.87	8926.87	182286	159243	44634.3	-	-	-
MWSmce577	Ethyl p-methoxycinnamate	Phenolic acids	Phenolic acids	C12H14O3	207.1	161.06	206.094	[M+H]+	3	1929-30-2	C10476	88897.9	88897.9	88897.9	88897.9	88897.9	88897.9	483582	444489	615742	-	C10476	-
Wdhp002567	3,6-dimethoxyphenanthren-4-ol	Phenolic acids	Phenolic acids	C16H14O3	255.099	107.048	254.094	[M+H]+	3	481-81-2	-	391757	367082	311644	210038	194966	190142	428197	401568	362228	-	-	-
Zbjp002538	1,7-bis(4-hydroxypheny)hept-1-ene-3-ol	Phenolic acids	Phenolic acids	C19H22O3	299.16	107.05	298.157	[M+H]+	2	-	-	1.33944e+06	1.37352e+06	1.51991e+06	890292	1.05208e+06	1.17204e+06	159543	159543	159543	-	-	-
Hmsp007523	Methyl-[8]-Shogaol	Phenolic acids	Phenolic acids	C20H30O3	319.221	191.1	318.219	[M+H]+	3	863780-79-4	-	3.45517e+06	3.66182e+06	3.74331e+06	3.11113e+06	3.07138e+06	2.78134e+06	3.4046e+06	2.83758e+06	2.834e+06	-	-	-
MWSmce064	Haematoxylin	Phenolic acids	Phenolic acids	C16H14O6	303.08	149.06	302.079	[M+H]+	3	517-28-2	C09931	1.90073e+06	2.04215e+06	1.97483e+06	290702	496819	405858	1.44501e+06	1.23856e+06	1.34621e+06	-	C09931	-
mws2105	Benzyl salicylate	Phenolic acids	Phenolic acids	C14H12O3	229.09	211.08	228.079	[M+H]+	3	118-58-1	-	1.08126e+06	915520	1.67104e+06	2.86358e+06	3.05561e+06	2.697e+06	1.32667e+06	1.15201e+06	1.15812e+06	-	-	-
pmb0758	Anisic acid-O-feruloyl glucoside	Phenolic acids	Phenolic acids	C24H26O11	491.15	329	490.147	[M+H]+	3	-	-	301019	290679	326175	121138	286189	397970	435104	417600	246254	-	-	-
Zbyp002336	p-galloyl-oxyphenyl-β-D-glucoside	Phenolic acids	Phenolic acids	C21H24O11	453.14	291.09	452.13	[M+H]+	3	-	-	384506	532975	528201	633768	341635	410288	638251	799546	991588	-	-	-
Walbp08740	3,3'-Oxydipropyl dibenzoate	Phenolic acids	Phenolic acids	C20H22O5	343.15	163.07	342.147	[M+H]+	3	94-51-9	-	4434.34	4434.34	4434.34	4434.34	4434.34	4434.34	68410.9	42819.2	75930.9	-	-	-
MWStz554	Methyl 4-caffeoylquinate	Phenolic acids	Phenolic acids	C17H20O9	369.12	163.04	368.111	[M+H]+	2	123372-74-7	-	12200.5	12200.5	12200.5	12200.5	12200.5	12200.5	93305.2	61002.5	90700.5	-	-	-
Sadp003970	2-O-P-Cumaroylglycerol	Phenolic acids	Phenolic acids	C12H14O5	239.09	147.04	238.084	[M+H]+	3	-	-	178335	327691	166281	7670.57	7670.57	7670.57	38352.8	291778	113659	-	-	-
Wacyp03375	1-O-Glutamoyl-3-O-Galloyl-5-O-caffeoylshikimic acid	Phenolic acids	Phenolic acids	C28H28N2O14	617.16	147.08	616.154	[M+H]+	3	-	-	1839.07	1839.07	1839.07	1839.07	1839.07	1839.07	14087.5	9195.34	12801.5	-	-	-
WaYp002866	3-(4-hydroxyphenyl)-3-oxopropyl beta-D-glucopyranoside	Phenolic acids	Phenolic acids	C15H20O8	329.12	121.03	328.116	[M+H]+	1	53170-92-6	-	100647	88140.6	110028	10412.8	10412.8	10412.8	10412.8	10412.8	10412.8	-	-	-
Lmap001606	Helicidol*	Phenolic acids	Phenolic acids	C13H18O7	287.11	107.05	286.105	[M+H]+	2	106982-96-1	-	425673	399933	349051	307163	311628	329569	299296	226502	272162	-	-	-
WaTKp04564	p-Coumaroyl-arabinofuranose	Phenolic acids	Phenolic acids	C14H16O7	297.1	147.04	296.09	[M+H]+	3	-	-	1.28936e+06	1.11262e+06	809887	127537	127537	127537	127537	127537	127537	-	-	-
Yshj000012	Isotachioside*	Phenolic acids	Phenolic acids	C13H18O8	303.11	141.05	302.1	[M+H]+	2	31427-08-4	-	123431	197025	181650	24686.3	24686.3	24686.3	24686.3	24686.3	24686.3	-	-	-
Lsmp121705	Tachioside*	Phenolic acids	Phenolic acids	C13H18O8	303.11	141.05	302.1	[M+H]+	2	109194-60-7	-	123431	197025	181650	24686.3	24686.3	24686.3	24686.3	24686.3	24686.3	-	-	-
Lahp003733	Clausenaglycoside A	Phenolic acids	Phenolic acids	C17H26O8	359.17	197.12	358.163	[M+H]+	3	-	-	236738	270286	241403	47347.7	47347.7	47347.7	327162	291747	331668	-	-	-
Lmap001821	Helicide	Phenolic acids	Phenolic acids	C13H16O7	285.1	123.04	284.09	[M+H]+	3	80154-34-3	-	14865.9	14865.9	14865.9	14865.9	14865.9	14865.9	91938.4	76577.3	95835.4	-	-	-
mws1509	Phenyl salicylate	Phenolic acids	Phenolic acids	C13H10O3	215.07	121.03	214.063	[M+H]+	3	118-55-8	C14163	21069.7	21069.7	21069.7	332750	186241	105348	21069.7	21069.7	21069.7	-	C14163	MetMap158
Lcgn000234	davidioside C	Phenolic acids	Phenolic acids	C15H16O9	339.07	177.02	340.079	[M-H]-	3	-	-	538956	525263	498822	369795	396218	382210	153572	167221	155859	-	-	-
MWS4303	4-hydroxystyrene	Phenolic acids	Phenolic acids	C8H8O	119.05	93.03	120.058	[M-H]-	3	2628-17-3	C05627	145989	142833	124561	97484.2	101801	87603.2	64074.4	98980.1	99388.9	ko00940,ko01110	C05627	-
Zaln004057	4-caffeoylshikimic acid	Phenolic acids	Phenolic acids	C16H16O8	335.08	179.03	336.084	[M-H]-	1	-	-	1.18196e+06	1.3634e+06	1.10891e+06	239496	234162	247014	694679	798737	696749	-	-	-
mws0014	Ferulate	Phenolic acids	Phenolic acids	C10H10O4	193.05	134.04	194.058	[M-H]-	3	537-98-4	C01494	345256	584301	522457	800862	832772	847609	1.0008e+06	1.02996e+06	746929	ko00940,ko00996,ko01100,ko01110	C01494	-
Lmyjn03753	Tropate	Phenolic acids	Phenolic acids	C9H10O3	165.06	103.06	166.063	[M-H]-	3	552-63-6	C01456	58702.2	50855.1	50748.7	46903	48106.8	30954.5	29922	28544.6	42335.4	ko00960,ko01110	C01456	-
Wasn002902	O-p-Coumaroylgalactaric acid	Phenolic acids	Phenolic acids	C15H16O10	355.07	209.03	356.074	[M-H]-	3	-	-	642069	559373	577459	513625	491594	486642	438374	404468	405921	-	-	-
mws1505	Phenethyl caffeate	Phenolic acids	Phenolic acids	C17H16O4	283.1	135.04	284.105	[M-H]-	3	104594-70-9	C10484	48095.8	60027.1	95919.6	46786.8	45637.8	38659.4	100945	123774	110633	-	C10484	-
Wasn003938	Benzoyl-Beta-D-Glucoside	Phenolic acids	Phenolic acids	C13H16O7	283.08	121.03	284.09	[M-H]-	1	-	-	87558	206806	76598.5	126124	170917	212350	63927.4	126335	85189.5	-	CM020442	MetMap157
Safn001820	Tichocarpol A	Phenolic acids	Phenolic acids	C9H10O7S	261.01	181.05	262.015	[M-H]-	1	-	-	6.09943e+07	6.11905e+07	5.86747e+07	6.19593e+07	5.88324e+07	6.0211e+07	5.64927e+07	5.70945e+07	5.40983e+07	-	-	-
Lmln010063	2,6-Di-tert-butylphenol	Phenolic acids	Phenolic acids	C14H22O	205.16	189.13	206.167	[M-H]-	1	128-39-2	-	1.9346e+06	2.25481e+06	2.11854e+06	2.07361e+06	2.10518e+06	2.16972e+06	2.52031e+06	2.58069e+06	2.64198e+06	-	-	-
Labn003316	pyrocatechol-β-D-xylopyranosyl(1-6)-β-D-glucopyranoside	Phenolic acids	Phenolic acids	C17H24O11	403.12	109.03	404.132	[M-H]-	2	-	-	61612.4	80643.9	84120.9	97828.4	96453.6	93045.8	38694.9	39105.9	28947.7	-	-	-
Walbn06605	2,3-bis(2-carboxyphenyl)succinic acid	Phenolic acids	Phenolic acids	C18H14O8	357.06	121.03	358.069	[M-H]-	1	-	-	1.12072e+06	1.81924e+06	1.26119e+06	7.98649e+06	8.2428e+06	7.99419e+06	2.30916e+06	1.59762e+06	3.24067e+06	-	-	-
Wafn002319	4-O-(3'-O-alpha-D-Glucopyranosyl)caffeoylquinic acid	Phenolic acids	Phenolic acids	C22H28O14	515.14	323.08	516.148	[M-H]-	2	1401352-63-3	-	59791.6	107985	70088.3	29709	34180.8	27562	105663	89589.1	97446.2	-	-	-
Zmln000668	Monogalloyl-diglucose	Phenolic acids	Phenolic acids	C19H26O15	493.12	169.01	494.127	[M-H]-	3	-	-	235882	197292	195480	231241	219808	190599	321290	275937	245142	-	-	-
pme2598	3,4-Dihydroxyphenylacetate*	Phenolic acids	Phenolic acids	C8H8O4	167.03	123.05	168.042	[M-H]-	3	102-32-9	C01161	608574	708252	692641	907103	875869	774297	587250	597692	574138	ko00350,ko01100	C01161	-
Lman002731	Grevilloside F	Phenolic acids	Phenolic acids	C15H18O9	341.09	135.04	342.095	[M-H]-	3	1094004-50-8	-	1.46753e+06	1.57954e+06	1.45391e+06	1.98557e+06	2.49325e+06	2.05302e+06	2.21727e+06	1.94016e+06	1.87614e+06	-	-	-
pmn001687	Cis-Coutaric acid	Phenolic acids	Phenolic acids	C13H12O8	295.05	163.04	296.053	[M-H]-	2	67920-37-0	-	397883	405184	466234	272835	286625	226956	80131.7	179104	204731	-	-	-
pmb3061	5-O-p-Coumaroylquinic acid O-glucoside	Phenolic acids	Phenolic acids	C22H28O13	499.15	163.1	500.153	[M-H]-	3	-	-	109924	103904	110370	135983	130219	160122	121124	111860	108522	-	-	-
pmb3142	Salicylic acid-2-O-glucoside	Phenolic acids	Phenolic acids	C13H16O8	299.08	137.02	300.084	[M-H]-	3	10366-91-3	-	1.73948e+06	1.45506e+06	1.52359e+06	1.44897e+06	1.79642e+06	1.71265e+06	2.92512e+06	3.04123e+06	3.12856e+06	-	CM020419	MetMap158
Wasn004683	Protocatechuic acid 1-O-(Glucosylvanilloyl)	Phenolic acids	Phenolic acids	C21H22O12	465.1	303.05	466.111	[M-H]-	1	-	-	1.04138e+07	1.06852e+07	1.14477e+07	1.38174e+07	1.20118e+07	1.31791e+07	7.61565e+06	6.75308e+06	7.24184e+06	-	-	-
mws1423	Dihydropinosylvin	Phenolic acids	Phenolic acids	C14H14O2	213.09	122.04	214.099	[M-H]-	2	14531-52-3	C10254	748965	789927	866546	9.30559e+06	9.15166e+06	9.65105e+06	582906	718970	911159	-	C10254	-
Lmrn003000	Phenyllactate	Phenolic acids	Phenolic acids	C9H10O3	165.06	103.06	166.063	[M-H]-	3	7326-19-4	C05607	852497	813139	823660	477984	420490	421848	458776	487343	425576	ko00360,ko00960,ko01100,ko01110	C05607	-
Zbln005108	3,4-Dihydroxyallylbenzene-4-O-xylosyl(1→6)glucoside	Phenolic acids	Phenolic acids	C20H28O11	443.16	149.06	444.163	[M-H]-	3	-	-	247230	236435	271108	234872	249820	198612	604376	637641	708651	-	-	-
Zmhn002422	1-O-Feruloyl-D-Glucose*	Phenolic acids	Phenolic acids	C16H20O9	355.103	193.052	356.11	[M-H]-	2	-	C17759	4.78152e+06	3.90249e+06	4.68377e+06	4.0954e+06	5.55846e+06	5.33741e+06	1.91877e+06	1.78261e+06	1.99398e+06	-	C17759	-
Wasyqn2170	Vanillic acid glucoside	Phenolic acids	Phenolic acids	C14H18O9	329.09	167.03	330.095	[M-H]-	1	32142-31-7	-	1.16071e+06	939072	1.13337e+06	865299	958217	978902	1.50088e+06	1.43299e+06	1.37191e+06	-	-	-
MWSHC2062	Ferulic β-glucoside*	Phenolic acids	Phenolic acids	C16H20O9	355.1	193.05	356.111	[M-H]-	2	14364-12-6	-	5.31109e+06	5.54133e+06	5.64753e+06	4.72836e+06	5.18263e+06	5.17907e+06	1.86713e+06	1.84836e+06	2.04229e+06	-	-	-
Yhhn008774	Stypandrol	Phenolic acids	Phenolic acids	C26H22O6	429.13	429.13	430.142	[M-H]-	2	99305-33-6	C09971	1.35327e+06	1.31613e+06	1.42322e+06	811187	948242	1.05621e+06	959577	996432	1.18146e+06	-	C09971	-
Cmsn002813	Methyl 2-O-(4-hydroxybenzoyl)-2,4,6-trihydroxyphenylacetate	Phenolic acids	Phenolic acids	C16H14O7	317.07	165.02	318.074	[M-H]-	3	-	-	62206.6	61722.3	63741.5	180702	142869	158890	46403.8	46040.5	42834.6	-	-	-
Rfn045100	Dihydrocoumaroyl Hexoside*	Phenolic acids	Phenolic acids	C15H20O8	327.11	165.06	328.116	[M-H]-	2	-	-	319149	273866	180361	210940	242947	253264	295523	243907	156991	-	-	-
Wasyqn2983	3-[4-(Beta-D-Glucopyranosyloxy)Phenyl]Propionic Acid*	Phenolic acids	Phenolic acids	C15H20O8	327.11	165.06	328.116	[M-H]-	2	-	-	279846	243039	260588	258495	303871	225440	235928	266610	179096	-	-	-
MWStz537	3-O-Feruloylquinic acid	Phenolic acids	Phenolic acids	C17H20O9	367.1	193.05	368.111	[M-H]-	1	40242-06-6	-	745749	566788	542624	260828	252903	243140	377126	387819	354884	-	-	-
Wasn005132	4-Galloyl-6-O-Benzoyl Glucose	Phenolic acids	Phenolic acids	C20H20O11	435.09	169.01	436.101	[M-H]-	2	-	-	3.81436e+06	3.92856e+06	4.06619e+06	3.22742e+06	2.9632e+06	3.14029e+06	4.79689e+06	4.07107e+06	4.20673e+06	-	CM020485	MetMap157
Lmcn002982	Methyl 3-O-Methyl Gallate	Phenolic acids	Phenolic acids	C9H10O5	197.05	167	198.053	[M-H]-	3	3934-86-9	-	44345.3	32736.1	22810.1	39721.3	24964.6	40384.5	39039.5	28580.3	38844.9	-	CM020433	MetMap156,MetMap157,MetMap160
pmb3064	3-O-p-Coumaroylquinic acid-O-glucoside	Phenolic acids	Phenolic acids	C22H28O13	499.15	163.2	500.153	[M-H]-	3	-	-	130371	111142	127789	143483	149878	124710	102766	94617.9	117907	-	-	-
MWSHC2022	Glucosyringic acid	Phenolic acids	Phenolic acids	C15H20O10	359.1	197.05	360.106	[M-H]-	1	33228-65-8	-	7.70914e+06	7.40616e+06	7.72262e+06	9.12158e+06	9.2187e+06	8.32571e+06	1.62958e+07	1.65675e+07	1.77835e+07	-	CM020538	MetMap156
pme1292	Homogentisate*	Phenolic acids	Phenolic acids	C8H8O4	167.03	123.05	168.042	[M-H]-	3	451-13-8	C00544	655369	688154	625721	804944	784651	765607	665242	618369	631151	ko00130,ko00350,ko01100,ko01240	C00544	-
Zmhn001793	6-O-Caffeoyl-D-glucose*	Phenolic acids	Phenolic acids	C15H18O9	341.09	179.03	342.095	[M-H]-	1	-	-	118510	169614	146080	180723	177243	188031	148582	158646	135787	-	-	-
pmn001420	1-O-Caffeoyl-β-D-glucose*	Phenolic acids	Phenolic acids	C15H18O9	341.09	179.04	342.095	[M-H]-	1	14364-08-0	C10433	118510	169614	146080	180723	177243	188031	148582	158646	135787	-	C10433	-
pme0281	Terephthalate	Phenolic acids	Phenolic acids	C8H6O4	165.02	121.03	166.027	[M-H]-	3	100-21-0	C06337	583399	772736	699860	714262	571610	412158	502261	638129	499081	ko01100	C06337	MetMap157
mws0179	Chlorogenic acid methyl ester	Phenolic acids	Phenolic acids	C17H20O9	367.1	190.9	368.111	[M-H]-	2	29708-87-0	-	1.84748e+06	1.67151e+06	1.64925e+06	129679	174815	108552	398827	404337	429716	-	-	-
Waptn02904	3-(3,5-dihydroxyphenyl)propanoic acid glucoside*	Phenolic acids	Phenolic acids	C15H20O9	343.1	181.05	344.111	[M-H]-	2	-	-	1.61531e+06	1.5244e+06	1.57803e+06	1.93888e+06	1.60044e+06	2.02538e+06	1.65153e+06	1.84714e+06	1.95514e+06	-	-	-
Lakn003294	2-β-D-Glucopyranosyloxy-5-hydroxyphenylacetic acidmethylester*	Phenolic acids	Phenolic acids	C15H20O9	343.1	181.05	344.111	[M-H]-	2	-	-	1.61531e+06	1.5244e+06	1.57803e+06	1.93888e+06	1.60044e+06	2.02538e+06	1.65153e+06	1.84714e+06	1.95514e+06	-	-	-
Jmwn002117	2,6-dimethoxybenzene-1,4-diol 1-O-β-D-glucopyranoside	Phenolic acids	Phenolic acids	C14H20O9	331.1	153.02	332.111	[M-H]-	3	-	-	764093	726778	705303	823111	896632	835270	608613	536940	489712	-	-	-
MWStz508	Regaloside D*	Phenolic acids	Phenolic acids	C18H24O10	399.13	163.04	400.137	[M-H]-	3	120601-66-3	-	255371	255578	287266	456052	371200	417053	133366	132693	154704	-	-	-
Hmmn002544	Ferulic acid-4-O-glucoside	Phenolic acids	Phenolic acids	C16H20O9	355.1	193.05	356.111	[M-H]-	1	117405-51-3	-	4.62866e+06	4.82454e+06	4.25025e+06	5.835e+06	7.36825e+06	6.14392e+06	2.65601e+06	4.05083e+06	3.40499e+06	-	-	-
Lmbn004790	Methyl 3-(3-hydroxy-4-methoxyphenyl)propanoate	Phenolic acids	Phenolic acids	C11H14O4	209.08	179.03	210.089	[M-H]-	3	129150-61-4	-	2.22008e+06	2.06022e+06	2.14237e+06	1.33091e+06	1.30333e+06	1.30688e+06	1.65744e+06	1.55106e+06	1.62263e+06	-	-	-
MWSmce248	3-Hydroxycinnamic Acid*	Phenolic acids	Phenolic acids	C9H8O3	163.04	119.05	164.047	[M-H]-	3	14755-02-3	C12621	711163	387619	423283	1.15426e+06	1.20755e+06	1.15055e+06	1.51269e+06	1.51985e+06	1.23274e+06	ko00360,ko01100	C12621	-
Wafn002874	4-O-(4'-O-alpha-D-Glucopyranosyl)caffeoylquinic acid	Phenolic acids	Phenolic acids	C22H28O14	515.14	323.08	516.148	[M-H]-	3	1401352-62-2	-	81311.5	88906.5	78117.7	37642.9	36006.9	24683.8	98049.4	123862	102879	-	-	-
Labn002716	galloyl acetyl glucoside	Phenolic acids	Phenolic acids	C15H18O11	373.08	169.02	374.085	[M-H]-	3	-	-	484552	442412	534212	1.32665e+06	1.40129e+06	1.40106e+06	29048.2	32426.3	25060.1	-	CM020544	MetMap155
pmb3075	3-O-p-Coumaroylshikimic acid	Phenolic acids	Phenolic acids	C16H16O7	319.08	145.03	320.09	[M-H]-	3	-	-	202650	182727	219330	184253	168658	190029	265800	259194	229199	-	-	-
Waptn02692	3-(3,4-dihydroxyphenyl)propanoic acid glucoside*	Phenolic acids	Phenolic acids	C15H20O9	343.1	181.05	344.111	[M-H]-	2	-	-	1.54251e+06	1.38725e+06	1.41398e+06	1.81216e+06	1.86016e+06	1.68536e+06	1.93777e+06	1.88052e+06	1.68647e+06	-	-	-
Lmmn000774	Dihydrocaffeoylglucose*	Phenolic acids	Phenolic acids	C15H20O9	343.1	181.05	344.111	[M-H]-	2	-	-	1.54251e+06	1.38725e+06	1.41398e+06	1.81216e+06	1.86016e+06	1.68536e+06	1.93777e+06	1.88052e+06	1.68647e+06	-	-	-
Waln003742	1-O-p-Coumaroyl Galactonic Acid	Phenolic acids	Phenolic acids	C15H18O9	341.09	195.05	342.095	[M-H]-	3	-	-	132705	114159	71893.7	152862	88200.3	118188	99116	57570.9	62402.2	-	-	-
pmn001515	3-Galloylshikimic acid	Phenolic acids	Phenolic acids	C14H14O9	325.06	93.03	326.064	[M-H]-	2	110082-91-2	-	83834.4	77084.1	83629.6	49211.8	37708.8	42062.4	22092.6	23911.6	25875.4	-	CM020534	MetMap156
Zbfn002690	1-(4-Hydroxybenzoyl)Glucose; 25545-07-7	Phenolic acids	Phenolic acids	C13H16O8	299.08	93.03	300.084	[M-H]-	3	-	-	99356.1	146800	109970	105317	96198.6	56535.9	114220	61817.2	69747.5	-	CM020468	MetMap157
Safn004770	Salviaflaside*	Phenolic acids	Phenolic acids	C24H26O13	521.13	359.08	522.137	[M-H]-	2	-	-	929319	956972	774363	485306	477010	478410	641005	545828	554190	-	-	-
WaYn004639	Salirepin 6'-O-p-Coumarate	Phenolic acids	Phenolic acids	C22H24O10	447.13	163.04	448.137	[M-H]-	2	-	-	102547	57033.2	60474.3	71656.9	87279.7	99213.1	54616.8	68090.2	64304.1	-	-	-
Lmsn002937	1-O-Caffeoyl-6-O-galloyl-β-D-glucose	Phenolic acids	Phenolic acids	C22H22O13	493.1	169.01	494.106	[M-H]-	2	-	-	68486.1	91722.4	95707.5	69931.2	79392.8	76666.3	109702	121394	124349	-	CM020576	MetMap155
pmn001468	Sibiricose A3	Phenolic acids	Phenolic acids	C19H26O13	461.13	137.02	462.137	[M-H]-	3	139726-39-9	-	43672.7	130599	29804.5	63219.8	47396.9	88726.7	162342	185543	162379	-	-	-
pme3083	Formylanthranilate	Phenolic acids	Phenolic acids	C8H7NO3	164.04	120.05	165.043	[M-H]-	3	3342-77-6	C05653	348129	285790	382562	772104	741405	853472	1.15057e+06	1.14717e+06	1.07307e+06	ko00380,ko01100	C05653	MetMap157
Lmsn002247	1-O-Salicyloyl-β-D-glucose*	Phenolic acids	Phenolic acids	C13H16O8	299.08	137.02	300.084	[M-H]-	1	60517-74-0	-	8.98208e+06	5.96673e+06	9.02627e+06	6.39559e+06	5.66066e+06	7.92493e+06	1.59224e+07	1.31319e+07	1.67247e+07	-	-	-
Wmhn001495	1,4-Di-O-Galloyl-D-glucose	Phenolic acids	Phenolic acids	C20H20O14	483.08	169.01	484.085	[M-H]-	3	-	-	69620.6	36344.8	44457.2	61459.5	89634.4	71767.2	65622.6	76743.1	66272.9	-	CM020498	MetMap155
mws0180	2,5-Dihydroxybenzoic acid; Gentisic Acid*	Phenolic acids	Phenolic acids	C7H6O4	153.02	109.03	154.027	[M-H]-	3	490-79-9	C00628	800275	1.01478e+06	555603	1.50561e+06	1.121e+06	1.16603e+06	996039	1.12893e+06	1.59953e+06	ko00350,ko01100	C00628	MetMap158,MetMap159
mws0639	2,3-Dihydroxybenzoate*	Phenolic acids	Phenolic acids	C7H6O4	153.02	109.03	154.027	[M-H]-	3	303-38-8	C00196	800275	1.01478e+06	555603	1.50561e+06	1.121e+06	1.16603e+06	996039	1.12893e+06	1.59953e+06	ko01110	C00196	MetMap158
Waymn03248	4-O-Feruloylquinic acid	Phenolic acids	Phenolic acids	C17H20O9	367.1	193.05	368.111	[M-H]-	2	2613-86-7	-	686019	606351	567147	275764	303131	301334	419222	388393	393185	-	-	-
HJN056	Sesquimarocanol B	Phenolic acids	Phenolic acids	C30H38O10	557.24	509.22	558.246	[M-H]-	3	-	-	1.52632e+07	1.13133e+07	1.66262e+07	1.65848e+07	1.30744e+07	1.01927e+07	1.12735e+07	7.88263e+06	1.00343e+07	-	-	-
Wacn002147	2-O-(1'-O-glucosyl-p-Coumaroyl)hydroxycitric Acid	Phenolic acids	Phenolic acids	C21H24O15	515.1	189	516.111	[M-H]-	2	-	-	35278	25840.7	38292	129342	139139	141786	154197	115606	114467	-	-	-
Lmsn003318	1-O-Feruloyl-β-D-glucose	Phenolic acids	Phenolic acids	C16H20O9	355.1	175.04	356.111	[M-H]-	3	7196-71-6	C17759	3.02746e+06	2.70899e+06	2.66178e+06	2.78782e+06	2.41703e+06	2.82193e+06	1.67641e+06	1.47508e+06	1.71574e+06	-	C17759	-
Lmfn003035	6-O-p-Coumaroyl-β-D-glucose	Phenolic acids	Phenolic acids	C15H18O8	325.09	145.03	326.1	[M-H]-	1	114297-65-3	-	482631	561315	487463	686114	626128	550252	192795	209110	220849	-	-	-
pme0282	Phthalate	Phenolic acids	Phenolic acids	C8H6O4	165.02	77.04	166.027	[M-H]-	3	88-99-3	C01606	99311.1	74810.4	77363	100081	75767	85806.6	83083.2	79909	69950.3	ko01100,ko02010	C01606	MetMap157
Zmhn002334	6-O-Feruloyl-β-D-glucose	Phenolic acids	Phenolic acids	C16H20O9	355.1	193.05	356.111	[M-H]-	3	137887-25-3	-	1.04071e+06	851094	949522	562371	457285	495321	466707	494881	576634	-	-	-
Lmyn002403	Mandelic acid-β-glucoside	Phenolic acids	Phenolic acids	C14H18O8	313.09	101.02	314.1	[M-H]-	3	-	-	171879	133418	160247	141920	170959	166323	136904	227671	134449	-	-	-
Rfn057834	(2R,3R,4S,5S,6R)-2-[3-(2,4-dihydroxyphenyl)propoxy]-6-(hydroxymethyl)oxane-3,4,5-triol	Phenolic acids	Phenolic acids	C15H22O8	329.12	59.01	330.132	[M-H]-	3	-	-	208183	97815	52391.5	120017	183032	102703	239792	90751.9	172586	-	-	-
MWStz398	4'-O-beta-D-Glucosyl-cis-p-coumarate	Phenolic acids	Phenolic acids	C15H18O8	325.09	163.04	326.1	[M-H]-	1	117405-48-8	C06739	2.03393e+06	2.6348e+06	2.61105e+06	2.90582e+06	2.41925e+06	2.46356e+06	3.02568e+06	3.23112e+06	2.31021e+06	-	C06739	-
Lmhn002683	p-Coumaroylcaffeoyltartaric acid	Phenolic acids	Phenolic acids	C22H18O11	457.08	163.04	458.085	[M-H]-	3	-	-	82189.8	60649.4	92626.8	103690	105979	121866	56444.6	87177.2	93854.6	-	-	-
pmn001629	Digalloylglucose*	Phenolic acids	Phenolic acids	C20H20O14	483.08	169.05	484.085	[M-H]-	3	-	-	20066.5	31452.1	40692.5	46188.3	62910.5	48749.8	52817.4	56956.6	62043.6	-	CM020592	MetMap155
Lmfn000797	2,3-Di-O-galloyl-β-D-glucose*	Phenolic acids	Phenolic acids	C20H20O14	483.08	169.01	484.085	[M-H]-	3	-	-	20066.5	31452.1	40692.5	46188.3	62910.5	48749.8	52817.4	56956.6	62043.6	-	CM020496	MetMap155
pmb3072	3-O-p-Coumaroylshikimic acid-O-glucoside	Phenolic acids	Phenolic acids	C22H26O12	481.14	319.3	482.142	[M-H]-	1	-	-	300398	246070	267390	660838	541770	613662	628002	638038	557261	-	-	-
Wchn003633	4'-Hydroxy-2'-Methoxyphenol 1-O-Beta-D-(6-O-Syringoyl) Glucopyranoside	Phenolic acids	Phenolic acids	C22H26O12	481.14	163.04	482.142	[M-H]-	1	-	-	119299	147646	136534	390185	449723	543639	386816	402596	400340	-	-	-
MWS2001	2-Hydroxy-3,5-dinitrobenzoic acid	Phenolic acids	Phenolic acids	C7H4N2O7	226.99	183	228.002	[M-H]-	3	609-99-4	C11319	235170	234886	233910	517648	654785	629195	177732	154858	172294	-	C11319	MetMap158
Rfn063680	2-β-D-Glucopyranosyloxy-4-methoxy-cis-cinnamic acid	Phenolic acids	Phenolic acids	C16H20O9	355.1	175.04	356.111	[M-H]-	2	-	-	401216	380823	395831	384241	458605	423777	144005	165789	160358	-	-	-
pmn001419	p-Coumaroyl-D-glucose	Phenolic acids	Phenolic acids	C15H18O8	325.09	163.04	326.1	[M-H]-	1	7139-64-2	C16827	315222	201810	356379	361874	377256	450483	111380	127059	150411	-	C16827	-
pmb3068	1-O-p-Coumaroylquinic acid*	Phenolic acids	Phenolic acids	C16H18O8	337.09	163.04	338.1	[M-H]-	1	-	-	944503	905069	803611	434801	486342	511828	551780	373960	600318	-	-	-
Wahsn02657	1-O-p-Coumaroyl Octose	Phenolic acids	Phenolic acids	C17H22O10	385.11	163.04	386.121	[M-H]-	1	-	-	391577	335599	299691	212348	618953	632244	226685	177158	243844	-	-	-
Lmyn003835	4-(3,4,5-Trihydroxybenzoxy)benzoic acid	Phenolic acids	Phenolic acids	C14H10O7	289.04	137.02	290.043	[M-H]-	3	-	-	423029	392288	406979	523396	458269	475058	410685	363037	316929	-	-	-
pmb2654	Anthranilate-1-O-Sophoroside	Phenolic acids	Phenolic acids	C19H27NO12	460.15	117.9	461.153	[M-H]-	3	-	-	73178.8	97772	36872.3	116968	73764.5	155518	90257	42395.2	62765.4	-	CM020446	MetMap157
Zbjn003642	1-O-rhamnose-3-O-Caffeoyl Quinic Acid	Phenolic acids	Phenolic acids	C22H28O13	499.15	191.06	500.155	[M-H]-	3	-	-	157209	180301	178734	566124	462672	624076	313337	363431	401744	-	-	-
Hmbn002692	6'-O-Feruloyl-D-sucrose	Phenolic acids	Phenolic acids	C22H30O14	517.16	175.04	518.164	[M-H]-	3	118230-77-6	-	264450	240582	195771	402919	376271	346122	329480	322320	283926	-	-	-
WaYn003084	Guaiacylglycerol 8-O-(1''-O-Glucosyl)Vanillic Acid Ether	Phenolic acids	Phenolic acids	C24H30O13	525.16	167.03	526.169	[M-H]-	1	-	-	1.74177e+07	1.1803e+07	1.54623e+07	9.62038e+06	1.23919e+07	1.51703e+07	2.27622e+07	9.98916e+06	1.62355e+07	-	-	-
Wasn003913	Protocatechuic acid 4-O-(6''-O-Galloy)Glucoside	Phenolic acids	Phenolic acids	C20H20O13	467.08	315.07	468.09	[M-H]-	3	-	-	175184	112779	130860	153345	93735	152099	170740	133230	174844	-	-	-
pmn001421	3-O-p-Coumaroylquinic acid	Phenolic acids	Phenolic acids	C16H18O8	337.09	191.06	338.1	[M-H]-	1	87099-71-6	-	1.88409e+07	1.80368e+07	1.50348e+07	1.38881e+06	1.26668e+06	1.26215e+06	8.58349e+06	6.56326e+06	6.99508e+06	-	-	-
Lmtn002565	1-O-Vanilloyl-D-Glucose	Phenolic acids	Phenolic acids	C14H18O9	329.11	167.03	330.095	[M-H]-	1	-	C20470	1.63068e+07	1.67336e+07	1.58118e+07	1.36765e+07	1.21474e+07	1.31949e+07	1.46335e+07	1.36384e+07	1.50987e+07	-	C20470	MetMap160
Wcgn003981	Methyl 3-O-glucosyl-4-hydroxybenzoate	Phenolic acids	Phenolic acids	C14H18O9	329.09	167.03	330.095	[M-H]-	1	155112-92-8	-	1.51905e+07	1.69206e+07	1.58642e+07	1.42862e+07	1.35514e+07	1.38741e+07	1.51278e+07	1.52247e+07	1.46278e+07	-	-	-
mws2120	Brevifolin carboxylic acid	Phenolic acids	Phenolic acids	C13H8O8	291.01	247.02	292.022	[M-H]-	3	18490-95-4	-	2.99315e+06	2.80629e+06	2.59419e+06	3.54232e+06	3.52544e+06	3.26877e+06	2.64889e+06	2.30774e+06	2.15951e+06	-	-	-
mws0178	Chlorogenate*	Phenolic acids	Phenolic acids	C16H18O9	353.09	191.06	354.095	[M-H]-	1	327-97-9	C00852	662884	565079	601277	633905	623350	569415	303499	324382	263676	ko00940,ko00941,ko00945,ko01110	C00852	-
pme1816	Neochlorogenic acid*	Phenolic acids	Phenolic acids	C16H18O9	353.09	191.06	354.095	[M-H]-	1	906-33-2	C17147	940066	853813	784121	772061	859020	787729	352489	411807	322456	-	C17147	-
WaYn004134	Salirepin 6'-O-Caffeate	Phenolic acids	Phenolic acids	C22H24O11	463.12	179.03	464.132	[M-H]-	3	-	-	1.43695e+06	1.01632e+06	1.14044e+06	1.16212e+06	1.26691e+06	1.32072e+06	1.10173e+06	1.2412e+06	1.21381e+06	-	-	-
Wacn003456	2-O-Feruloylhydroxycitric Acid	Phenolic acids	Phenolic acids	C16H16O11	383.06	127	384.069	[M-H]-	3	-	-	560148	496871	544929	757970	835396	871979	443741	477381	399015	-	-	-
Rfn048602	Melilotoside	Phenolic acids	Phenolic acids	C15H18O8	325.09	119.05	326.1	[M-H]-	1	618-67-7	-	4.20637e+06	3.55563e+06	2.96348e+06	2.66057e+06	4.69367e+06	3.73685e+06	2.68943e+06	1.08001e+06	2.19305e+06	-	-	-
mws1714	Chicoric Acid	Phenolic acids	Phenolic acids	C22H18O12	473.07	149.01	474.08	[M-H]-	3	70831-56-0	C10437	82300	59617.9	75015.7	92880.4	78867.4	78683.3	92152.9	121416	93039.2	-	C10437	-
Lmmn003663	5-Glucosyloxy-2-Hydroxybenzoic acid methyl ester	Phenolic acids	Phenolic acids	C14H18O9	329.09	167.04	330.095	[M-H]-	1	-	-	1.66093e+07	1.70263e+07	1.67522e+07	1.36229e+07	1.43609e+07	1.30354e+07	1.59521e+07	1.49197e+07	1.59322e+07	-	CM020422	MetMap159
Lmrgn03360	Cryptamygin B	Phenolic acids	Phenolic acids	C15H20O8	327.11	165.06	328.116	[M-H]-	3	24696-05-7	-	87301.3	113972	93451.8	136484	140223	165863	99213.8	137112	85462.5	-	-	-
Wacn003131	2-O-P-Coumaroylhydroxycitric Acid	Phenolic acids	Phenolic acids	C15H14O10	353.05	127	354.059	[M-H]-	2	-	-	2.12273e+06	2.03753e+06	1.97348e+06	3.51594e+06	3.17774e+06	3.44334e+06	4.48722e+06	3.85547e+06	4.7193e+06	-	-	-
Wabn003563	3'-O-Beta-D-Glucopyranosyl plumbagic acid	Phenolic acids	Phenolic acids	C17H22O10	385.11	179.07	386.121	[M-H]-	2	-	-	410687	397552	402480	332244	364400	371056	243320	356746	329521	-	-	-
MWSHC20125	5-O-Caffeoylshikimic acid	Phenolic acids	Phenolic acids	C16H16O8	335.08	135.05	336.084	[M-H]-	1	73263-62-4	C10434	5.44844e+07	4.90647e+07	5.07904e+07	1.03444e+07	9.94233e+06	1.05062e+07	2.85921e+07	2.97947e+07	2.93049e+07	ko00940,ko00941,ko00945,ko01100,ko01110	C10434	-
Lmbn004847	4-Methoxyphenylpropionic acid	Phenolic acids	Phenolic acids	C10H12O3	179.07	146.04	180.079	[M-H]-	3	-	-	1.08037e+06	921098	1.65143e+06	705928	657602	946979	671253	829642	1.39658e+06	-	-	-
Smln008909	Aloebarbendol	Phenolic acids	Phenolic acids	C15H14O4	257.08	239.07	258.089	[M-H]-	3	194145-93-2	-	321392	344088	387485	1.4065e+06	1.52467e+06	1.46502e+06	121177	124274	190165	-	-	-
WaYn002313	Homosyringic Acid 4'-O-Glucoside	Phenolic acids	Phenolic acids	C16H22O10	373.11	193.05	374.121	[M-H]-	1	-	-	5.14007e+06	4.2676e+06	4.62742e+06	2.48723e+06	2.68844e+06	2.69058e+06	2.98164e+06	2.85991e+06	2.73254e+06	-	-	-
Wasn006102	Apiosylrhododendrin	Phenolic acids	Phenolic acids	C21H32O11	459.19	165.09	460.195	[M-H]-	3	-	-	518379	570104	427755	1.67312e+06	1.64358e+06	1.86938e+06	1.25766e+06	926795	1.38148e+06	-	-	-
Wasn002449	Protocatechuic acid 1-O-Rutinoside	Phenolic acids	Phenolic acids	C19H26O13	461.13	152.01	462.137	[M-H]-	3	-	-	21758.6	23246	17414.1	15677	21422.3	12540	12500	16115.2	12612.8	-	-	-
mws0467	Phloretate	Phenolic acids	Phenolic acids	C9H10O3	165.06	119.05	166.063	[M-H]-	3	501-97-3	C01744	104788	107852	62742.3	195393	236016	182762	115944	90203.8	67983.9	ko01100	C01744	-
pmn001547	3-Hydroxy-5-Methylphenol-1-O-(6'-Digalloyl)Glucoside*	Phenolic acids	Phenolic acids	C27H26O15	589.12	437.1	590.127	[M-H]-	3	-	-	88701.2	54423.8	51438.5	80083.9	45916.4	48958.3	49262.3	37313.9	30043.8	-	-	-
Labn004891	4',6'-O-Digalloylsalicin*	Phenolic acids	Phenolic acids	C27H26O15	589.12	437.11	590.127	[M-H]-	3	-	-	88701.2	54423.8	51438.5	80083.9	45916.4	48958.3	49262.3	37313.9	30043.8	-	-	-
MWSmce501	Protocatechuic Acid Methyl Ester	Phenolic acids	Phenolic acids	C8H8O4	167.04	108.02	168.042	[M-H]-	3	2150-43-8	-	202335	115162	136115	345345	238226	249500	197731	196480	270571	-	CM020403	MetMap157
pmn001710	Rosmarinic acid-3'-O-glucoside*	Phenolic acids	Phenolic acids	C24H26O13	521.13	359.08	522.137	[M-H]-	2	910028-78-3	-	1.11506e+06	1.28527e+06	1.11286e+06	629805	536419	773209	851621	915029	767025	-	-	-
mws0183	3,4-Dihydroxybenzoate*	Phenolic acids	Phenolic acids	C7H6O4	153.02	109.03	154.027	[M-H]-	3	99-50-3	C00230	2.27029e+06	1.78347e+06	768422	1.94343e+06	2.76352e+06	2.7663e+06	1.59069e+06	1.72174e+06	2.82511e+06	ko00400,ko01100,ko01110	C00230	MetMap157
Lakn001671	2-β-D-Glucopyranosyloxy-5-hydroxy-phenylacetic acid	Phenolic acids	Phenolic acids	C14H18O9	329.09	123.05	330.095	[M-H]-	1	-	-	1.51667e+06	1.37791e+06	1.59852e+06	2.25673e+06	5.15397e+06	5.22394e+06	5.31702e+06	4.78478e+06	5.12017e+06	-	-	-
Lmsn003628	6'-O-Sinapoylsucrose*	Phenolic acids	Phenolic acids	C23H32O15	547.17	223.06	548.174	[M-H]-	3	-	-	31539.6	24407.1	28035.1	20220.7	25931.3	14031.4	56422.3	51954.2	59032.9	-	-	-
pmb3074	5-p-Coumaroyl quinic acid	Phenolic acids	Phenolic acids	C16H18O8	337.09	191.06	338.1	[M-H]-	1	1899-30-5	C12208	1.82058e+06	2.33396e+06	1.92477e+06	2.36921e+06	1.78981e+06	1.81645e+06	3.29517e+06	4.7034e+06	3.89099e+06	ko00940,ko00941,ko00945,ko01110	C12208	-
Hmtn001302	Glucosyloxybenzoic acid*	Phenolic acids	Phenolic acids	C13H16O8	299.08	137.02	300.084	[M-H]-	1	-	-	1.56496e+06	3.12388e+06	4.01723e+06	2.60952e+06	1.87837e+06	1.94964e+06	4.82529e+06	4.77388e+06	2.30775e+06	-	-	-
Wasdn02417	3-hydroxybenzoyl-β-D-glucose*	Phenolic acids	Phenolic acids	C13H16O8	299.08	137.02	300.084	[M-H]-	1	-	-	1.56496e+06	3.12388e+06	4.01723e+06	2.60952e+06	1.87837e+06	1.94964e+06	4.82529e+06	4.77388e+06	2.30775e+06	-	-	-
Ymjm000148	Salidroside	Phenolic acids	Phenolic acids	C14H20O7	299.11	137.02	300.121	[M-H]-	3	10338-51-9	C06046	1.56496e+06	3.12388e+06	4.01723e+06	2.60952e+06	1.87837e+06	1.94964e+06	4.82529e+06	4.77388e+06	2.30775e+06	ko00350,ko01100	C06046	-
mws0159	Phenylpyruvate	Phenolic acids	Phenolic acids	C9H8O3	163.04	91.06	164.047	[M-H]-	3	156-06-9	C00166	83513.3	65799.4	46815.7	154473	202004	123824	127011	159457	127460	ko00360,ko00400,ko00470,ko00960,ko01100,ko01110,ko01210,ko01230	C00166	-
mws2108	Cryptochlorogenic acid (4-O-Caffeoylquinic acid)*	Phenolic acids	Phenolic acids	C16H18O9	353.09	191.06	354.095	[M-H]-	1	905-99-7	-	596731	1.00879e+06	619539	160081	124809	117299	217326	300505	387517	-	-	-
Zmhn002508	4-p-Cumaroyl-rhamnosyl-(1→6)-D-glucose	Phenolic acids	Phenolic acids	C21H28O12	471.15	309.1	472.158	[M-H]-	3	-	-	512022	378653	801123	930364	619775	902936	477338	398059	628564	-	-	-
MWSmce583	Piperonylic acid	Phenolic acids	Phenolic acids	C8H6O4	165.02	91.02	166.027	[M-H]-	3	94-53-1	-	132211	157698	134070	176384	123786	112075	163243	172791	190327	-	-	-
HJN093	2-O-Salicyl-6-O-Galloyl-D-Glucose	Phenolic acids	Phenolic acids	C20H20O12	451.09	313.05	452.096	[M-H]-	3	-	-	26263.9	46290.4	52578.1	44464.4	48533.9	24951.9	34086.2	49867.1	36821.3	-	-	-
Ymjm000147	p-Hydroxyphenyl 6-O-(E)-caffeoyl-β-D-allopyranoside*	Phenolic acids	Phenolic acids	C21H22O10	433.11	161.02	434.121	[M-H]-	3	-	-	69692.9	61421.3	44910.9	47239	46253	57088.8	70467.1	77711.9	53193.9	-	-	-
Zbfn006124	2,6-Di-Feruloyl glucoside	Phenolic acids	Phenolic acids	C26H28O12	531.15	193.05	532.158	[M-H]-	3	-	-	55718.1	53401.8	72293.2	95010.1	97221.7	112333	24451.9	26818.6	34453.1	-	-	-
Zbfn003303	3-(Hydroxycinnamoyl)-quinic acid*	Phenolic acids	Phenolic acids	C16H18O8	337.09	163.04	338.1	[M-H]-	1	-	-	583779	447222	437118	199617	207027	187674	234131	175668	205213	-	-	-
mws0346	3-(3-Hydroxyphenyl)-propionic acid	Phenolic acids	Phenolic acids	C9H10O3	165.06	106.04	166.063	[M-H]-	3	621-54-5	C11457	60724.1	50449.6	46801	78705	77997.8	84697.4	59623.5	58866	26964.8	ko00360,ko01100	C11457	-
Yyhn007343	aceroside Ⅷ	Phenolic acids	Phenolic acids	C30H42O12	593.27	593.27	594.268	[M-H]-	3	-	-	4.063e+06	4.54733e+06	3.93908e+06	5.45377e+06	4.33372e+06	5.23873e+06	4.74238e+06	4.61464e+06	4.23421e+06	-	-	-
Wasn003676	Paeonicluside	Phenolic acids	Phenolic acids	C18H24O11	415.12	121.03	416.132	[M-H]-	3	-	-	55465.6	33757	65754.9	58037.1	141481	25876	79789.6	65766.8	14167.6	-	-	-
Lmtn000940	1-O-(3,4-Dihydroxy-5-methoxy-benzoyl)-glucoside	Phenolic acids	Phenolic acids	C14H18O10	345.08	139.04	346.09	[M-H]-	3	-	-	1.17224e+06	1.07049e+06	1.05192e+06	10104.1	1.62084e+06	1.76607e+06	975091	947406	1.19313e+06	-	CM020472	MetMap155,MetMap156
Zmhn003082	5-O-Methylgalloylquinic Acid	Phenolic acids	Phenolic acids	C15H18O10	357.08	173.04	358.09	[M-H]-	3	-	-	76402.2	51245.9	43005	45664	47920.1	46427.3	38348.5	43439	41045.1	-	-	-
Zmhn002545	4-O-(6'-O-Glucosylcaffeoyl)-3,4-dihydroxybenzyl alcohol	Phenolic acids	Phenolic acids	C22H24O11	463.12	323.08	464.132	[M-H]-	3	-	-	45294.1	30204.3	48954.2	21657.8	20500.2	20820.5	16744.1	13721.8	10491.5	-	-	-
Lmsn002887	1-O-Caffeoyl-β-D-xylose	Phenolic acids	Phenolic acids	C14H16O8	311.08	163.04	312.084	[M-H]-	3	-	-	54014.8	53261.9	57706.4	43387.7	32466.6	29942.9	58231.2	42458.9	30675.7	-	-	-
Lmsn005122	1-O-Galloyl-6-O-Cinnamoyl-β-D-glucose*	Phenolic acids	Phenolic acids	C22H22O11	461.11	169.01	462.116	[M-H]-	3	115746-69-5	-	350826	328999	330411	343257	370496	354285	220973	259790	255637	-	CM020552	MetMap155
pma6460	4-p-Coumaroylquinic acid	Phenolic acids	Phenolic acids	C16H18O8	337.09	163.04	338.1	[M-H]-	3	93451-44-6	C10441	139851	136740	127398	17451.8	16898.5	12126.1	49786.5	65408.2	31408.7	-	C10441	-
Laln003968	3,4-dihydroxyallyl benzene-xylose-glucoside	Phenolic acids	Phenolic acids	C20H28O11	443.15	149.06	444.163	[M-H]-	2	-	-	39328.5	29385.8	43620.3	41170	31965.4	61847.2	60523.8	60012.9	53100.5	-	-	-
pmn001367	Protocatechuic acid-4-O-glucoside*	Phenolic acids	Phenolic acids	C13H16O9	315.072	153.017	316.079	[M-H]-	1	-	-	258660	188718	257674	3226.52	231211	240854	160433	144220	156636	-	CM020404	MetMap157
Safn001250	3-hydroxy-4-{[(2S,3R,4S,5S,6R)-3,4,5-trihydroxy-6-(hydroxymethyl)oxan-2-yl]oxy}benzoic acid*	Phenolic acids	Phenolic acids	C13H16O9	315.07	153.02	316.079	[M-H]-	1	-	-	258660	188718	257674	3226.52	231211	240854	160433	144220	156636	-	-	-
pmb2871	1-O-Gentisoyl-β-D-glucoside*	Phenolic acids	Phenolic acids	C13H16O9	315.07	153.02	316.079	[M-H]-	1	23445-11-6	-	258660	188718	257674	3226.52	231211	240854	160433	144220	156636	-	CM020554	MetMap159
Zmgn004894	Methyl 4-hydroxybenzoate	Phenolic acids	Phenolic acids	C8H8O3	151.04	136.02	152.047	[M-H]-	3	99-76-3	-	203063	223950	230780	313228	463066	380661	317734	356711	417157	-	CM020385	MetMap157
pme0085	Rosmarinate	Phenolic acids	Phenolic acids	C18H16O8	359.08	161.02	360.084	[M-H]-	1	537-15-5	C01850	32990.3	37394.9	30178	45532.6	59580.6	55316.7	40707.5	42916.7	28149.5	ko00350,ko01100	C01850	-
Hmsn003897	Idescarpin	Phenolic acids	Phenolic acids	C20H24O11	439.13	111.04	440.132	[M-H]-	2	-	-	223377	231619	199159	315965	298840	197892	204597	202370	149723	-	-	-
Rfn049443	3-(2-Glucosyloxy-4-methoxyphenyl)propanoic acid*	Phenolic acids	Phenolic acids	C16H22O9	357.12	195.07	358.126	[M-H]-	1	477873-63-5	-	36224.8	36224.8	36224.8	181124	311161	207572	244702	295238	300957	-	-	-
Wafn002827	Dihydroferulic acid glucoside*	Phenolic acids	Phenolic acids	C16H22O9	357.12	195.07	358.126	[M-H]-	1	-	-	36224.8	36224.8	36224.8	181124	311161	207572	244702	295238	300957	-	-	-
Wasn005803	Protocatechuic acid 4-O-(6''-O-Feruloyl)Glucoside*	Phenolic acids	Phenolic acids	C23H24O12	491.12	315.07	492.127	[M-H]-	3	-	-	7633.77	31363.8	21843	35990.2	43526.7	36063.1	33181	17650	17718.4	-	-	-
WaYn005296	SalicyolylSalirepin	Phenolic acids	Phenolic acids	C20H22O10	421.11	137.03	422.121	[M-H]-	3	-	-	65352.3	73259.3	96902	186512	192792	203380	75217.2	64108.7	94500.7	-	-	-
Lman003972	6-O-Caffeoylarbutin*	Phenolic acids	Phenolic acids	C21H22O10	433.11	161.03	434.121	[M-H]-	3	136172-60-6	-	71532.8	41536.9	65697.2	45796.4	36486.1	31559	25797.1	21190.2	40578.5	-	-	-
Jmwn004308	4-Dihydroxyphenethoxy-8-O-[6-O-(4-O-glucosyl)feruloyl]glucoside	Phenolic acids	Phenolic acids	C30H38O15	637.21	475.16	638.221	[M-H]-	3	-	-	223647	168190	167802	299084	228869	383815	171482	160706	152792	-	-	-
Hmtn001288	Methyl 2,4-dihydroxyphenylacetate	Phenolic acids	Phenolic acids	C9H10O4	181.05	135.04	182.058	[M-H]-	3	67828-42-6	-	659000	606780	636807	663174	751661	668668	563979	438134	574003	-	-	-
Lmhn003799	Feruloylferuloyltartaric acid	Phenolic acids	Phenolic acids	C24H22O12	501.1	307.05	502.111	[M-H]-	3	-	-	42148.7	51685.6	47377.2	33828.2	43535.4	27742.9	30206.8	25428.8	23634.9	-	-	-
pmb3066	5-O-p-Coumaroylshikimic acid O-glucoside	Phenolic acids	Phenolic acids	C22H26O12	481.14	319.2	482.142	[M-H]-	2	-	-	193319	72883.3	215973	115340	98474.2	113550	34878.3	138729	124210	-	-	-
Labn006314	5-[6-(benzoyloxymethyl)-3,4,5-trihydroxyoxan-2-yl]oxy-2-hydroxybenzoic acid	Phenolic acids	Phenolic acids	C20H20O10	419.1	153.03	420.106	[M-H]-	3	-	-	293118	159620	213679	139907	208522	351964	349574	214154	173116	-	-	-
Zbfn005854	2,6-Di-(4-hydroxycinnamoyl)glucoside	Phenolic acids	Phenolic acids	C24H24O10	471.13	163.04	472.137	[M-H]-	3	-	-	190943	154443	188623	214706	212497	219747	178289	166323	172733	-	-	-
Zbfn006009	2-Feruloyl-6-(4-hydroxycinnamoyl)glucoside	Phenolic acids	Phenolic acids	C25H26O11	501.14	163.04	502.147	[M-H]-	3	-	-	42538.5	32466.5	42695.5	67017.2	53477.6	45285.8	23625.2	36260.8	35562.4	-	-	-
Wasyqn2995	Trans-Caffeic Acid 4-O-[Apiosyl-(1→6)-Glucosyl] Ester	Phenolic acids	Phenolic acids	C20H26O13	473.13	179.03	474.137	[M-H]-	2	-	-	26598.9	38745.3	39454.4	41403.1	36828.5	36188.6	48090.4	30906.7	33108	-	-	-
Wasn004983	5-Galloyl-6-O-Benzoyl Glucose	Phenolic acids	Phenolic acids	C20H20O11	435.09	153.02	436.101	[M-H]-	3	-	-	7516.03	7516.03	7516.03	37580.1	39345.1	64041.4	60698.3	92550.9	95778.1	-	CM020486	MetMap155,MetMap157
pmb3317	Quinacyl syringic acid	Phenolic acids	Phenolic acids	C16H20O10	371.1	179.1	372.106	[M-H]-	3	-	-	955003	1.02355e+06	920157	663784	1.29664e+06	456017	91203.4	91203.4	91203.4	-	CM020543	MetMap156
Lmsn005333	4-O-Galloyl-1-O-Cinnamoyl-β-D-glucose*	Phenolic acids	Phenolic acids	C22H22O11	461.11	169.01	462.116	[M-H]-	3	-	-	318534	378227	359334	393232	402739	370958	243616	280817	207343	-	CM020553	MetMap155
Zmdn004976	palmatoside(3-O-cinnamoyl-1-O-galloyl-β-D-glucopyranoside)*	Phenolic acids	Phenolic acids	C22H22O11	461.11	169.02	462.116	[M-H]-	3	-	-	318534	378227	359334	393232	402739	370958	243616	280817	207343	-	-	-
pmn001320	1-O-p-Cumaroylglycerol	Phenolic acids	Phenolic acids	C12H14O5	237.08	163.04	238.084	[M-H]-	3	106055-11-2	-	57435.6	29482.8	28484.4	28102	45254.7	47447.7	47390.7	30783.8	23989.5	-	-	-
Lmhn002573	Sinapoylglucuronic acid	Phenolic acids	Phenolic acids	C17H20O11	399.09	205.04	400.101	[M-H]-	3	-	-	13962.8	20473.1	18007.4	16560.8	8306.38	17292.4	1661.28	1661.28	1661.28	-	-	-
Lmmn001643	trans-2-Hydroxycinnamate*	Phenolic acids	Phenolic acids	C9H8O3	163.04	119.05	164.047	[M-H]-	3	583-17-5	C01772	456339	691302	753406	904469	1.01938e+06	1.118e+06	1.45567e+06	1.29156e+06	1.42082e+06	ko00360,ko00999,ko01100,ko01110	C01772	-
Hahn000897	picrorhizin	Phenolic acids	Phenolic acids	C20H28O14	491.14	167.03	492.148	[M-H]-	2	60824-10-4	-	33894.2	54791.8	63072.6	4503.35	4503.35	4503.35	51410.8	22516.8	102128	-	-	-
Lmhn001386	Vnilloyltartaric acid	Phenolic acids	Phenolic acids	C12H12O9	299.04	167.03	300.048	[M-H]-	3	-	-	1119.03	1119.03	1119.03	5595.13	52092.9	10908.3	1119.03	1119.03	1119.03	-	CM020528	MetMap160
WaYn005157	Gentisic acid 2-O-(6''-O-Feruloyl)Glucoside*	Phenolic acids	Phenolic acids	C23H24O12	491.12	315.07	492.127	[M-H]-	3	-	-	27937.6	39689.8	35689.9	5587.52	5587.52	5587.52	5587.52	5587.52	5587.52	-	CM020560	MetMap159
MWSmce230	Methyl gallate*	Phenolic acids	Phenolic acids	C8H8O5	183.03	124.02	184.037	[M-H]-	3	99-24-1	-	4600.71	4600.71	4600.71	48325.9	46943.3	38635.3	23003.5	41507	30073.1	-	CM020431	MetMap156,MetMap157
Zmhn002750	4-O-(6'-O-Glucosylcaffeoyl)-4-hydroxybenzoic acid	Phenolic acids	Phenolic acids	C22H22O11	461.11	323.08	462.116	[M-H]-	3	-	-	13157.4	11481.2	42557.5	38365.6	19062.3	25921.9	26396.4	23786.7	34368.7	-	CM020447	MetMap157
Lmsn003582	1-O-Galloyl-4-O-p-Coumaroyl-β-D-glucose	Phenolic acids	Phenolic acids	C22H22O12	477.1	169.01	478.111	[M-H]-	3	-	-	2459.51	2459.51	2459.51	21440.1	12297.5	38928.2	12718.8	17049.3	33574.3	-	CM020569	MetMap155
Lmsn005754	1-O-Galloyl-2-O-Cinnamoyl-β-D-glucose	Phenolic acids	Phenolic acids	C22H22O11	461.11	169.01	462.116	[M-H]-	3	56994-83-3	-	370247	345590	359325	391783	373505	357055	230695	236171	247017	-	CM020551	MetMap155
pmn001671	Furanofructosyl-α-D-(6-mustard acyl)glucoside*	Phenolic acids	Phenolic acids	C23H32O15	547.17	223.1	548.174	[M-H]-	3	-	-	26143.8	33941.5	26029.8	13227.1	25835.3	19703.3	48294.6	44287.7	76807.9	-	-	-
Lmfn001584	Methyl 4,6-di-O-galloyl-D-glucoside	Phenolic acids	Phenolic acids	C21H22O14	497.09	169.01	498.101	[M-H]-	3	-	-	75858.2	75453.9	66513	240918	154885	202032	63871.5	62227.9	56555.8	-	CM020577	MetMap155,MetMap156
Wafn003070	Hydroxyferulic acid glucoside	Phenolic acids	Phenolic acids	C16H20O10	371.1	209.05	372.106	[M-H]-	3	-	-	1.4119e+07	1.27164e+07	1.24371e+07	3.84162e+06	3.86514e+06	3.75434e+06	1.58586e+07	1.54775e+07	1.4459e+07	-	-	-
Lmsn002288	1-O-Caffeoyl-(6-O-glucosyl)-β-D-glucose	Phenolic acids	Phenolic acids	C21H28O14	503.14	341.09	504.148	[M-H]-	1	-	-	61884.6	63290.9	68175.7	104128	96432.8	72178.2	56110	49015.8	27187.9	-	-	-
Zbfn002169	3'-p-Coumaroyl-sucrose	Phenolic acids	Phenolic acids	C21H28O13	487.15	145.03	488.153	[M-H]-	3	-	-	112168	100882	118274	108675	105252	105550	135272	134550	125386	-	-	-
Zbjn003605	1,4-O-di-Caffeoyl-3-O-glucoside Quinic Acid	Phenolic acids	Phenolic acids	C31H34O17	677.17	515.14	678.18	[M-H]-	3	-	-	61767.8	49554.4	48836.9	43667.9	55905.2	78488.4	4207.5	4207.5	4207.5	-	-	-
Zmhn001358	4-O-Glucosyl-4-hydroxybenzoic acid*	Phenolic acids	Phenolic acids	C13H16O8	299.08	137.02	300.084	[M-H]-	1	-	-	1.39099e+06	1.39875e+06	1.4461e+06	820458	1.48535e+06	1.40156e+06	2.14069e+06	1.91922e+06	2.28513e+06	-	C03993	MetMap157
Zmhn002032	4-O-(6'-O-Glucosylcaffeoylglucosyl)-4-hydroxybenzyl alcohol	Phenolic acids	Phenolic acids	C28H34O15	609.18	447.13	610.19	[M-H]-	3	-	-	46533.2	28859.6	36650.6	51316.9	58503.1	58995.7	25229.6	27969.1	64283.5	-	-	-
Zbfn003643	Kelampayoside A[3,4,5-Trimethoxyphenol-β-D-apiosyl-(1→6)-β-D-glucoside]	Phenolic acids	Phenolic acids	C20H30O13	477.16	293.09	478.169	[M-H]-	2	87562-76-3	-	10834.4	10574.7	8950.15	16178.4	5611.14	9533.95	4566.85	13755.6	6534.64	-	-	-
Waptn02725	Feruloyloctose	Phenolic acids	Phenolic acids	C18H24O11	415.12	193.05	416.132	[M-H]-	1	-	-	125924	105985	105272	83931.5	96365.6	97165.1	59330	44966.8	65069.4	-	-	-
pmn001459	Sibiricose A6	Phenolic acids	Phenolic acids	C23H32O15	547.17	205.05	548.174	[M-H]-	3	241125-75-7	-	13892.1	18806.9	7546.93	14367.6	13216.7	13593.5	1509.39	1509.39	1509.39	-	-	-
HJN037	3,5-Dihydroxy-4-methoxybenzoic acid; 4-O-Methylgallic Acid*	Phenolic acids	Phenolic acids	C8H8O5	183.03	124.02	184.037	[M-H]-	3	4319-02-2	-	2269.27	2269.27	2269.27	30207.7	73839.2	19194.3	11346.3	54119.4	51583	-	CM020411	MetMap156,MetMap157
mws2212	Caffeate	Phenolic acids	Phenolic acids	C9H8O4	179.03	135.05	180.042	[M-H]-	3	331-39-5	C01197	3.33601e+06	3.01435e+06	2.92718e+06	2.67261e+06	1.32068e+06	3.17906e+06	5.51685e+06	3.8314e+06	4.84926e+06	ko00940,ko00996,ko01100,ko01110	C01197	-
WaYn004519	Salicortin	Phenolic acids	Phenolic acids	C20H24O10	423.13	123.05	424.137	[M-H]-	2	29836-41-7	-	26712.3	7039.12	28738.8	1407.82	1407.82	1407.82	1407.82	1407.82	1407.82	-	-	-
Zmhn003297	3-O-Digalloyl quinic acid	Phenolic acids	Phenolic acids	C21H20O14	495.08	343.07	496.085	[M-H]-	3	-	-	1283.55	1283.55	1283.55	15737.2	9321.93	11591.3	10748.2	6417.75	8608.01	-	-	-
Hmln000873	2-O-Galloyl-D-glucose	Phenolic acids	Phenolic acids	C13H16O10	331.07	169.01	332.074	[M-H]-	1	-	-	2481.91	2481.91	2481.91	2481.91	2481.91	2481.91	1.26369e+06	1.25173e+06	12409.6	-	CM020412	MetMap155
Lakn002368	2-Hydroxy-5-methylbenzoyl-1-O-glucose	Phenolic acids	Phenolic acids	C14H18O8	313.09	107.05	314.1	[M-H]-	1	-	-	52589.8	49846.8	36703.1	7340.62	7340.62	7340.62	7340.62	7340.62	7340.62	-	CM020530	MetMap158
Zbkn008746	Prenyl caffeate	Phenolic acids	Phenolic acids	C14H16O4	247.1	135.04	248.105	[M-H]-	3	118971-61-2	C10487	4900.44	21138.1	37031.7	898.945	898.945	898.945	9008.11	8754.48	6125.12	-	C10487	-
Wafn002807	methyl 4-O-galloylchlorogenate	Phenolic acids	Phenolic acids	C24H24O13	519.11	165.02	520.122	[M-H]-	3	574747-58-3	-	973.876	973.876	973.876	8814.66	11242.5	10032.7	4869.38	7318.35	8766.82	-	CM020583	MetMap156
mad2394	Sinapoyl-p-coumaroyltartaric acid	Phenolic acids	Phenolic acids	C24H22O12	501.1	337.05	502.111	[M-H]-	3	-	-	12239.2	16373.1	10120.1	25050	20807.6	29505	25418.3	9545.29	13850.3	-	-	-
Hmln000659	3-O-Galloyl-Glucose*	Phenolic acids	Phenolic acids	C13H16O10	331.07	169.01	332.074	[M-H]-	1	-	-	1.16564e+07	1.14308e+07	1.13225e+07	1.2119e+07	11916234	1.10917e+07	1.43163e+07	1.46626e+07	1.29393e+07	-	CM020454	MetMap155
Laln006487	Benzyl 3,6-dimethoxy-2-{[3,4,5-trihydroxy-6-(hydroxymethyl)oxan-2-yl]oxy}benzoate	Phenolic acids	Phenolic acids	C22H26O10	449.14	287.1	450.153	[M-H]-	1	-	-	128020	128020	128020	689991	640100	658438	128020	128020	128020	-	-	-
mws0024	Gallate	Phenolic acids	Phenolic acids	C7H6O5	169.01	125.02	170.022	[M-H]-	3	149-91-7	C01424	2.19529e+06	2.07233e+06	2.31004e+06	2.30437e+06	1.92381e+06	2.29492e+06	2.34371e+06	2.16136e+06	1.98848e+06	ko00999	C01424	MetMap155,MetMap156
MWS1839	Ethylparaben	Phenolic acids	Phenolic acids	C9H10O3	165.06	92.03	166.063	[M-H]-	3	120-47-8	-	883898	886899	949361	1.78186e+06	1.78473e+06	1.80632e+06	126553	124838	115049	-	CM020388	MetMap157
mws0749	4-Hydroxybenzoate	Phenolic acids	Phenolic acids	C7H6O3	137.02	93.03	138.032	[M-H]-	3	99-96-7	C00156	861004	869834	753219	983471	1.00258e+06	1.0087e+06	758411	860897	717797	ko00130,ko00790,ko01100,ko01110,ko01240	C00156	MetMap157
Sakn004920	Isolugrandoside	Phenolic acids	Phenolic acids	C29H36O16	639.2	477.16	640.2	[M-H]-	3	-	-	73238.2	80443.7	36790.8	240362	243188	378452	117740	166948	140048	-	-	-
Wmmp000181	1´-O-Benzoylsucrose	Phenolic acids	Phenolic acids	C19H26O12	445.13	121.03	446.142	[M-H]-	2	-	-	11323.8	11323.8	11323.8	66964	97471.7	74808.5	11323.8	11323.8	11323.8	-	-	-
Li512115	Isochlorogenic acid B	Phenolic acids	Phenolic acids	C25H24O12	515.12	353.09	516.127	[M-H]-	3	14534-61-3	C10468	5396.65	5396.65	5396.65	143576	131841	163723	98933.5	94208	79470.6	-	C10468	-
Wcdn001824	2,5-Dihydroxybenzoic acid-5-O-glucoside	Phenolic acids	Phenolic acids	C13H16O9	315.07	153.02	316.079	[M-H]-	2	-	-	29255.7	29255.7	29255.7	193765	186216	146279	29255.7	29255.7	29255.7	-	-	-
Hmtn001120	5-(2-Hydroxyethyl)-2-O-glucosylphenol*	Phenolic acids	Phenolic acids	C14H20O8	315.11	153.06	316.116	[M-H]-	3	-	-	182976	212263	161299	190078	186586	209668	32259.8	32259.8	32259.8	-	-	-
Zbfn004208	3-O-(3-Methoxy-4-hydroxybenzoyl)-4-O-caffeoylquinic acid	Phenolic acids	Phenolic acids	C24H24O12	503.12	323.08	504.127	[M-H]-	3	-	-	43807.8	59001.1	40921.2	60534.5	34255.8	53596.2	6851.17	6851.17	6851.17	-	CM020491	MetMap160
Lmsn004090	1-O-Galloyl-3-O-p-Coumaroyl-β-D-glucose	Phenolic acids	Phenolic acids	C22H22O12	477.1	169.01	478.111	[M-H]-	3	-	-	1507.63	1507.63	1507.63	28708.7	17965.8	32262.8	17661	8781.74	10742.5	-	CM020568	MetMap155
WaYn004439	[(1R,2R)-cyclohex-4-ene-1,2-diol]2-O-(6''-O-Caffeoyl)glucoside	Phenolic acids	Phenolic acids	C21H26O10	437.14	161.02	438.153	[M-H]-	3	-	-	52152.7	33406.5	104697	99015.4	98730.4	87335.5	6681.31	6681.31	6681.31	-	-	-
Wasn002933	1-O-(3,4,5-Trimethoxybenzoyl)-B-D-Glucopyranoside	Phenolic acids	Phenolic acids	C16H22O10	373.11	211.06	374.121	[M-H]-	3	-	-	1.0986e+06	1.20509e+06	1.12876e+06	2.01129e+06	2.3773e+06	2.45349e+06	913823	900086	944101	-	CM020473	MetMap156,MetMap157,MetMap160
Labn002264	Grevilloside G*	Phenolic acids	Phenolic acids	C14H20O8	315.11	153.05	316.116	[M-H]-	3	791846-69-0	-	422790	305658	500955	469869	111251	465622	22250.1	22250.1	22250.1	-	-	-
Zmyn002204	Dimethylgalloyl-glucose-arabinoside	Phenolic acids	Phenolic acids	C20H28O14	491.14	197.05	492.148	[M-H]-	2	-	-	146567	191312	186133	159292	204818	215556	331121	276831	284210	-	-	-
mws2213	trans-Cinnamate	Phenolic acids	Phenolic acids	C9H8O2	147.05	103.06	148.052	[M-H]-	3	140-10-3	C00423	56843.5	44181.3	47810.8	72341.1	75362.9	70456.9	73521.6	65727.7	68609.3	ko00130,ko00360,ko00940,ko00996,ko00999,ko01100,ko01110	C00423	-
Safn004850	3'-O-β-Glucopyranosyl plumbagic acid methyl ester	Phenolic acids	Phenolic acids	C18H24O10	459.15	237.08	400.137	[M+CH3COOH-H]-	3	-	-	10111.5	10111.5	10111.5	56025.5	51852.9	147638	50557.3	65689.2	114223	-	-	-
Lmfn000604	6-O-Galloyl-β-D-glucose*	Phenolic acids	Phenolic acids	C13H16O10	331.07	169.01	332.074	[M-H]-	1	13186-19-1	-	1.36503e+07	1.28144e+07	1.29098e+07	1.38785e+07	1.42026e+07	1.20208e+07	1.52727e+07	1.57268e+07	1.48998e+07	-	CM020437	MetMap155
Zmhn001703	5-O-Galloyl-D-hamamelose*	Phenolic acids	Phenolic acids	C13H16O10	331.07	169.02	332.074	[M-H]-	1	-	-	1.36503e+07	1.28144e+07	1.29098e+07	1.38785e+07	1.42026e+07	1.20208e+07	1.52727e+07	1.57268e+07	1.48998e+07	-	CM020487	MetMap155
Zbfn002396	6-O-Dihydrocaffeoylglucose	Phenolic acids	Phenolic acids	C15H20O9	343.1	163.04	344.111	[M-H]-	1	-	-	35818.8	36069.4	36620.4	17922	14900	23649.4	2980.01	2980.01	2980.01	-	-	-
Lmln001195	Picein	Phenolic acids	Phenolic acids	C14H18O7	297.1	135.07	298.105	[M-H]-	1	530-14-3	C10720	109047	65373	72297.1	30605.4	36905.8	15219	3043.81	3043.81	3043.81	-	C10720	-
mws0748	1-Caffeoylquinic acid	Phenolic acids	Phenolic acids	C16H18O9	353.09	191.06	354.095	[M-H]-	2	1241-87-8	-	121881	155456	98979.5	233617	211047	182925	372749	447338	382739	-	-	-
MWStz518	Regaloside A*	Phenolic acids	Phenolic acids	C18H24O10	399.13	163.04	400.137	[M-H]-	3	114420-66-5	-	11859.7	23739.3	20404.6	2371.95	2371.95	2371.95	2371.95	2371.95	2371.95	-	-	-
Lazn001573	Erythro-Guaiacylglycerol	Phenolic acids	Phenolic acids	C10H14O5	213.08	150.03	214.084	[M-H]-	1	-	-	4747.54	4747.54	4747.54	4747.54	4747.54	4747.54	60694.1	54295.7	23737.7	-	-	-
Lmhn003240	Benzoylmalic acid	Phenolic acids	Phenolic acids	C11H10O6	237.04	121.03	238.048	[M-H]-	3	22138-51-8	-	9516.51	9516.51	9516.51	143571	185417	135819	92827.2	107971	105255	-	CM020458	MetMap157
mws0028	Vanillate	Phenolic acids	Phenolic acids	C8H8O4	167.03	108.02	168.042	[M-H]-	3	121-34-6	C06672	30688.7	30688.7	30688.7	249550	238665	338159	255145	238222	235792	-	C06672	MetMap157,MetMap160
Lmhn002895	Feruloylcaffeoyltartaric acid	Phenolic acids	Phenolic acids	C23H20O12	487.09	193.06	488.096	[M-H]-	3	-	-	1702.7	1702.7	1702.7	1702.7	1702.7	1702.7	17807.9	21834.3	8513.48	-	-	-
Hmln002996	β-Hydroxyacteoside	Phenolic acids	Phenolic acids	C29H36O16	639.19	621.18	640.2	[M-H]-	3	95587-86-3	-	86163.6	79786.7	90260.8	147322	181489	164599	12152.8	12152.8	12152.8	-	-	-
Lmhn003223	Cinnamoyltartaric acid	Phenolic acids	Phenolic acids	C13H12O7	279.05	147.04	280.058	[M-H]-	3	-	-	1645.87	1645.87	1645.87	20314.7	12991.2	15609	1645.87	1645.87	1645.87	-	-	-
Waln002782	1'-Galactoyl Ferulic acid	Phenolic acids	Phenolic acids	C16H20O10	371.1	193.05	372.106	[M-H]-	3	-	-	20360.5	20376.8	16140.9	17534	22873.9	22946.7	43607.9	18246.1	24694.5	-	-	-
Zbfn005095	2-(3,4-dihydroxyphenethoxy)6-mustardyl-O-glucosyl-D-xylose	Phenolic acids	Phenolic acids	C30H38O16	653.2	429.14	654.216	[M-H]-	2	-	-	3520.64	3520.64	3520.64	21145.8	24909.9	21313.2	3520.64	3520.64	3520.64	-	-	-
Labn004065	4-Hydroxybenzoyl acetyl glucoside	Phenolic acids	Phenolic acids	C15H18O9	341.09	137.03	342.095	[M-H]-	3	-	-	60583.7	60021.7	70201.4	131189	150635	156358	5451.62	5451.62	5451.62	-	CM020471	MetMap157
Wmzn002116	3,5-Dicaffeoylquinic acid	Phenolic acids	Phenolic acids	C25H24O12	515.12	353.09	516.127	[M-H]-	2	-	-	5647.01	5647.01	5647.01	28235.1	59559.2	59660.3	5647.01	5647.01	5647.01	-	-	-
MWS2058	3-Methylsalicylic Acid	Phenolic acids	Phenolic acids	C8H8O3	151.04	107.05	152.047	[M-H]-	3	83-40-9	C14088	23979	25405.4	21125	27154.2	34190.5	29624.6	1843.63	1843.63	1843.63	-	C14088	MetMap158
zjbp110810	6,8-dihydroxy-2-[2-(3'-hydroxy-4'-methoxyphenyl)ethyl]chromone	Others	Chromone	C18H16O6	329.1	313.08	328.095	[M+H]+	1	-	-	223910	205931	190820	703676	693170	692882	197188	199201	206739	-	-	-
Wbsp000037	1-[3-(4-methyl-6-oxocyclohex-1-en-1-yl)propyl]pyrrolidin-2-one	Others	Ketone compounds	C14H21NO2	236.16	58.02	235.157	[M+H]+	3	-	-	920629	884763	993396	626298	590975	594045	336603	383434	382803	-	-	-
Zmzp006523	6-Demethoxycapillarisin	Others	Chromone	C15H10O6	287.06	195.03	286.048	[M+H]+	3	61854-36-2	C17786	1.84737e+06	1.89454e+06	1.60094e+06	1.93836e+06	1.76985e+06	2.22037e+06	1.54901e+06	1.72555e+06	1.70528e+06	-	C17786	-
MWSHC20158	5-Methoxyfurfural*	Others	Aldehyde compounds	C6H6O3	127.04	53.04	126.032	[M+H]+	2	21300-07-2	-	875096	568109	640222	921368	627846	832877	429609	442448	415877	-	-	-
zjsp010407	1,7-bis(4-hydroxyphenyl)-3-heptanone	Others	Others	C19H22O3	299.16	107.05	298.157	[M+H]+	3	-	-	2.99006e+07	2.39208e+07	2.8245e+07	2.0734e+07	2.45624e+07	2.31618e+07	1.16539e+07	1.6667e+07	1.60247e+07	-	-	-
pmp001236	Clove chromone	Others	Chromone	C11H10O4	207.07	121.03	206.058	[M+H]+	3	-	-	585917	665056	715168	568130	456112	629420	764305	248455	792791	-	-	-
Lmbp007051	6-Hydroxy-2-[2-(3'-methoxy-4'-hydroxyphenylethyl)]chromone*	Others	Chromone	C18H16O5	313.11	137.06	312.1	[M+H]+	3	-	-	1.13505e+06	2.12076e+06	1.71576e+06	7.99267e+06	8.96603e+06	9.15536e+06	2.18114e+06	1.63109e+06	3.35579e+06	-	-	-
Zbjp006709	1,7-bis(4-hydroxy-3-methoxyphenyl)hept-1-ene-3-ol	Others	Ketone compounds	C21H26O5	359.175	137.06	358.178	[M+H]+	3	-	-	2.49381e+07	4.26791e+07	3.14658e+07	1.40052e+08	1.66304e+08	1.85597e+08	3.36823e+07	2.72957e+07	6.18855e+07	-	-	-
Hamp007385	5-hydroxy-7,8-dimethoxyflavanone	Others	Others	C17H16O5	301.11	181.05	300.1	[M+H]+	2	-	-	4.18247e+06	4.84856e+06	3.58255e+06	2.42029e+06	2.32369e+06	2.25076e+06	598980	333644	535782	-	-	-
Zahp007439	3,4-Methylenedioxycinnamaldehyde	Others	Aldehyde compounds	C10H8O3	177.05	149.02	176.047	[M+H]+	3	58095-77-5	-	1.12434e+06	1.30393e+06	1.13806e+06	1.33938e+06	1.52256e+06	1.16693e+06	1.49672e+06	1.74546e+06	1.51844e+06	-	-	-
Zahp011689	2,2-dimethylchromene-6-carboxylic acid*	Others	Others	C12H12O3	205.09	149.02	204.079	[M+H]+	2	34818-56-9	-	2.11105e+07	1.72658e+07	1.85837e+07	1.1751e+07	1.10046e+07	1.28202e+07	6.68304e+06	7.30932e+06	8.86633e+06	-	-	-
MWS1844	2-Pentyl-3-phenyl-2-propenal	Others	Aldehyde compounds	C14H18O	203.14	129.07	202.136	[M+H]+	3	122-40-7	C12288	285461	430906	374630	375272	629944	400825	437286	482303	429657	-	C12288	-
Hmbp001276	Gallacetophenone	Others	Ketone compounds	C8H8O4	169.05	65.03	168.042	[M+H]+	3	528-21-2	-	731444	644070	893880	564511	596661	433596	698371	686825	678200	-	CM01681	MetMap139
MWSmce294	Elemicin	Others	Others	C12H16O3	209.11	153.05	208.11	[M+H]+	3	487-11-6	C10451	455558	490658	400452	513839	561562	504027	584809	593552	640212	-	C10451	-
Wcdp005264	Tetradecasphinganine	Others	Others	C14H31NO2	246.24	88.08	245.236	[M+H]+	1	-	-	403854	409877	422544	448949	444722	432406	431269	456180	408997	-	-	-
Cmsp008655	Pinosylvin methyl ether	Others	Stilbene	C15H14O2	227.11	121.06	226.099	[M+H]+	2	35302-70-6	C10276	5.68617e+07	6.141e+07	6.15173e+07	3.64015e+07	3.82917e+07	3.68417e+07	2.83799e+07	2.94425e+07	3.06734e+07	-	C10276	MetMap152
Walbp07454	3-Hydrocinnamyl-6-CinnamylGlucose	Others	Alcohol compounds	C24H30O6	415.21	119.09	414.204	[M+H]+	1	-	-	572882	775193	559168	771486	1.06788e+06	1.23857e+06	1.37502e+06	2.12632e+06	532826	-	-	-
Layp007667	Bauhinoxepin I	Others	Alcohol compounds	C16H14O5	287.09	167.03	286.084	[M+H]+	3	-	-	4.86783e+06	5.9639e+06	5.09833e+06	2.20928e+06	2.33315e+06	2.25277e+06	581521	413109	579605	-	-	-
Wcdp001953	2-methyl-1-nitronaphthalene	Others	Others	C11H9NO2	188.07	118.07	187.063	[M+H]+	1	881-03-8	-	2.1537e+06	2.32149e+06	2.3412e+06	2.38731e+06	2.31685e+06	2.267e+06	5.24111e+06	5.09848e+06	5.22062e+06	-	-	-
Safp021843	tributyl phosphate	Others	Others	C12H27O4P	267.17	98.98	266.165	[M+H]+	3	126-73-8	C14439	161877	156946	51040.1	72495.3	103875	91178.9	186051	175323	126393	-	C14439	-
Wasyqp2711	2-(Hydroxymethyl)Cyclohexa-2,5-Diene-1,4-Dione	Others	Others	C7H6O3	139.04	121.03	138.032	[M+H]+	3	644-17-7	-	1.08181e+06	883681	907592	1.54831e+06	1.60041e+06	1.40183e+06	920368	1.03492e+06	969890	-	-	-
Wbmp003302	Frambinone	Others	Ketone compounds	C10H12O2	165.09	91.05	164.084	[M+H]+	2	-	-	8.08012e+06	7.62598e+06	7.94576e+06	8.00257e+06	7.38491e+06	9.07713e+06	7.72087e+06	7.80543e+06	8.39645e+06	-	-	-
Qacp006853	1-Methoxy-2,3-methylenedioxy-xanthone-glucoside	Others	Xanthone	C23H24O10	461.14	299.09	460.137	[M+H]+	3	-	-	407955	338064	402033	622086	603763	719684	228027	350035	263612	-	-	-
Wahlp08143	3,4-Didehydro Retinol	Others	Others	C20H28O	285.22	147.12	284.214	[M+H]+	2	-	-	3.68873e+07	3.73852e+07	3.82521e+07	7.08823e+07	6.7971e+07	7.20524e+07	3.29941e+07	3.37291e+07	3.3894e+07	-	-	-
Lmxp001668	2-Methoxy-4-ethenylphenol	Others	Others	C9H10O2	151.08	91.05	150.068	[M+H]+	1	7786-61-0	C17883	2.35081e+07	2.01509e+07	2.04201e+07	1.23473e+07	1.45645e+07	1.40481e+07	2.89954e+07	2.81819e+07	2.66497e+07	-	C17883	-
Wcdp004275	Lauramine oxide	Others	Others	C14H31NO	230.25	57.07	229.241	[M+H]+	1	1643-20-5	-	187744	193139	189508	205123	168862	164229	164028	163617	170460	-	-	-
Zmgp004297	7-(4-Hydroxyphenyl)-1-phenyl-4-hepten-3-one	Others	Ketone compounds	C19H20O2	281.15	107.05	280.146	[M+H]+	2	100667-52-5	-	266468	164458	151075	253070	275580	662513	325056	458865	393195	-	-	-
MWSmce040	Isovanillin	Others	Aldehyde compounds	C8H8O3	153.05	65.04	152.047	[M+H]+	3	621-59-0	-	1.49677e+06	1.65885e+06	1.56681e+06	1.64879e+06	2.23838e+06	2.0792e+06	2.5902e+06	2.65896e+06	2.63818e+06	-	-	-
Lszp210009	Linarionoside A	Others	Others	C19H34O7	375.24	177.16	374.231	[M+H]+	3	-	-	185443	151612	182590	153154	338909	195908	220604	271710	203867	-	-	-
Zkep143812	6-Deoxy-6-sulfoglucono-1,5-lactone	Others	Lactones	C6H10O8S	243.02	225.01	242.01	[M+H]+	1	-	C21064	5.80198e+06	6.5518e+06	5.2211e+06	8.08276e+06	1.05663e+07	8.7498e+06	6.12238e+06	6.03926e+06	1.09716e+07	-	C21064	-
MWSHC2071	Cosmosaldehyde	Others	Others	C15H22O2	235.17	119.08	234.162	[M+H]+	3	1234203-35-0	-	742356	608473	755827	1.30419e+06	1.2467e+06	1.19539e+06	1.48884e+06	1.82414e+06	1.60283e+06	-	-	-
Walbp08560	3,5-di-tert-Butyl-4-hydroxyacetophenone	Others	Ketone compounds	C16H24O2	249.18	193.13	248.178	[M+H]+	1	14035-33-7	-	447322	547413	478200	584796	298982	472644	471864	670398	603944	-	-	-
Lcfp092575	4-(2,3,6-Trimethylphenyl)butan-2-ol	Others	Alcohol compounds	C13H20O	193.16	133.1	192.151	[M+H]+	1	-	-	3.28933e+06	2.99985e+06	2.89172e+06	2.98081e+06	3.55784e+06	3.68603e+06	3.30808e+06	2.9566e+06	2.79809e+06	-	-	-
MWSmce417	5-O-Methylvisammioside	Others	Chromone	C22H28O10	453.17	291.13	452.168	[M+H]+	2	84272-85-5	-	708192	572753	969197	501112	790463	863821	814963	798317	863249	-	-	-
MWS2069	2-Methoxy-4-methylphenol	Others	Others	C8H10O2	139.08	77.04	138.068	[M+H]+	3	93-51-6	-	4.85088e+06	4.3775e+06	3.79059e+06	2.81481e+06	3.79146e+06	3.38106e+06	4.63448e+06	4.32746e+06	4.13307e+06	-	-	-
Qacp005275	3-Hydroxy-1,2-dimethoxyxanthone-glucoside*	Others	Xanthone	C21H22O10	435.13	273.08	434.121	[M+H]+	3	-	-	985587	1.03677e+06	1.18096e+06	1.47448e+06	1.4774e+06	1.41305e+06	2.20659e+06	3.01214e+06	2.95528e+06	-	-	-
MWSmce041	Butylphthalide	Others	Lactones	C12H14O2	191.1	145.1	190.099	[M+H]+	3	6066-49-5	C17854	7.40305e+06	5.70875e+06	7.54817e+06	6.08632e+06	6.69382e+06	6.56574e+06	5.83355e+06	6.51676e+06	4.86922e+06	-	C17854	-
Wcdp006912	Lauryldiethanolamine	Others	Others	C16H35NO2	274.28	88.08	273.267	[M+H]+	1	1541-67-9	-	8.52263e+06	8.49983e+06	8.1841e+06	8.27355e+06	8.17457e+06	8.08845e+06	8.56453e+06	7.73032e+06	8.81461e+06	-	-	-
zjbp110806	6-hydroxy-7-methoxy-2-[2-(4'-hydroxyphenyl)ethyl]chromone*	Others	Chromone	C18H16O5	313.11	137.06	312.1	[M+H]+	3	-	-	1.27214e+06	2.06997e+06	1.60048e+06	6.81879e+06	9.5239e+06	8.4805e+06	2.13552e+06	1.58697e+06	3.30396e+06	-	-	-
Lmbp000668	Isonicotinic acid	Others	Vitamin	C6H5NO2	124.04	78.03	123.032	[M+H]+	3	55-22-1	C07446	416959	453015	441449	677533	518730	578678	392955	392772	431564	-	C07446	-
Wcgp010223	3-(Cyclohexen-1-yl)-2-hydroxy-4a,5-dimethyl-2,3,4,5,6,7,8,8a-octahydronaphthalen-1-one	Others	Others	C18H28O2	277.22	93.07	276.209	[M+H]+	3	-	-	4.06073e+06	3.61154e+06	4.18867e+06	5.33895e+06	5.00642e+06	5.17985e+06	975646	1.20831e+06	1.02331e+06	-	-	-
pmp001235	Cnidilide	Others	Lactones	C12H18O2	195.14	79.05	194.131	[M+H]+	2	-	C16937	531613	623762	738586	681898	728349	639491	419010	253886	278464	-	C16937	-
HX1340	epiloliolide	Others	Others	C11H16O3	197.12	133.1	196.11	[M+H]+	3	-	-	471085	398644	374976	558218	576454	561065	384460	327667	413922	-	-	-
MWSmce500	2-Hydroxy-4-Methoxybenzaldehyde	Others	Aldehyde compounds	C8H8O3	153.05	65.04	152.047	[M+H]+	3	673-22-3	-	854417	813038	763743	593189	462398	709975	756746	635317	841155	-	-	-
Lmbp000728	(S)-2-Phenyloxirane	Others	Others	C8H8O	121.06	77.04	120.058	[M+H]+	3	20780-54-5	C20782	2.39555e+06	1.39622e+06	2.2961e+06	2.51509e+06	3.35521e+06	3.08462e+06	2.67347e+06	1.40528e+06	2.60276e+06	ko01100	C20782	-
Wbtp003341	(3,5-dihydroxyphenyl)-(4-hydroxy-2,6-dimethoxyphenyl)methanone	Others	Ketone compounds	C15H14O6	291.09	139.04	290.079	[M+H]+	3	-	-	1.54685e+07	1.54952e+07	1.52232e+07	1.87745e+07	1.98457e+07	1.71404e+07	1.52459e+07	1.62029e+07	1.81213e+07	-	-	-
Zbsp003145	Leucopelargonidin; 3,4,5,7,4'-Pentahydroxyflavan	Others	Others	C15H14O6	291.09	123.04	290.079	[M+H]+	1	520-17-2	-	1.00051e+07	1.02116e+07	1.02005e+07	1.21512e+07	1.14373e+07	1.11721e+07	1.05018e+07	1.04764e+07	1.07992e+07	-	-	-
Wagp006039	2-Hexylphosphoric Acid	Others	Others	C6H15O4P	183.08	98.98	182.071	[M+H]+	3	-	-	332457	438084	413627	303639	360989	337675	385470	381163	404592	-	-	-
HX1141	1-Methyl-resveratrol	Others	Stilbene	C15H14O3	243.1	121.06	242.094	[M+H]+	3	-	-	2.16632e+07	2.22486e+07	2.18052e+07	1.28461e+07	1.34399e+07	1.284e+07	1.17957e+07	1.28275e+07	1.25058e+07	-	-	-
Zmgp003559	5-hydroxy-7-(4-hydroxyphenyl)-1-phenyl-3-heptanone	Others	Ketone compounds	C19H22O3	299.17	133.07	298.157	[M+H]+	3	83161-96-0	-	1.52828e+07	1.65126e+07	2.02193e+07	1.5485e+07	1.48672e+07	1.26556e+07	1.00717e+07	1.00106e+07	1.06822e+07	-	-	-
pmp001232	Neoligustilide	Others	Lactones	C12H14O2	191.11	135.08	190.099	[M+H]+	3	-	-	5.59632e+06	4.59953e+06	5.1653e+06	4.22653e+06	4.12566e+06	5.10512e+06	3.35536e+06	4.11592e+06	3.45318e+06	-	-	-
MWS0442	Maltotriose	Others	Saccharides	C18H32O16	527.16	365.1	504.169	[M+Na]+	3	1109-28-0	C01835	2.53304e+06	2.04486e+06	1.95774e+06	2.73829e+06	1.48458e+06	2.48301e+06	1.98794e+06	1.54096e+06	1.44799e+06	ko02010	C01835	-
Lssp210111	2α-Acetoxy-14β-[(S)-2-methyl-butyryloxy]-4(20),11-taxadiene	Others	Others	C27H42O6	463.31	301.22	462.298	[M+H]+	2	-	-	505600	479329	513396	1.40492e+06	1.63514e+06	1.04012e+06	329598	330281	272329	-	-	-
MWSmce698	2',4'-Dimethylacetophenone	Others	Ketone compounds	C10H12O	149.1	65.04	148.089	[M+H]+	3	89-74-7	-	1.44714e+06	1.4811e+06	1.42959e+06	1.62438e+06	1.56776e+06	1.41557e+06	1.55375e+06	1.87477e+06	1.72108e+06	-	CM01674	MetMap139
zjbp110805	6-hydroxy-2-[2-(3-methoxy-4-hydroxyphenyl)ethyl]chromone*	Others	Chromone	C18H16O5	313.11	137.06	312.1	[M+H]+	3	-	-	1.36037e+06	2.48583e+06	1.373e+06	9.09014e+06	7.98178e+06	8.31313e+06	1.93771e+06	1.59072e+06	3.43715e+06	-	-	-
pmb0789	5'-O-beta-D-Glucosylpyridoxine	Others	Vitamin	C14H21NO8	332.13	152.07	331.127	[M+H]+	3	-	C03996	42312.7	32815.6	48220.1	59096.6	70919.6	52047.2	48819.6	38276.6	43346.8	-	C03996	-
Zmjp000624	Pyridoxal	Others	Vitamin	C8H9NO3	168.06	150.05	167.058	[M+H]+	3	66-72-8	C00250	247786	241888	283676	406089	301936	326318	378804	391394	319641	ko00750,ko01100,ko01240	C00250	-
MWSslk114	Pherocon (4-(4-Acetoxyphenyl)-2-butanone)	Others	Ketone compounds	C12H14O3	207.1	107.05	206.094	[M+H]+	3	3572-06-3	-	1.36541e+06	1.29848e+06	1.03287e+06	613034	870090	642388	1.34088e+06	878829	1.17593e+06	-	-	-
Zbzp007397	5,6,7,7a-tetrahydro-4,4,7a-trimethyl-2(4H)-benzofuranone	Others	Others	C11H16O2	181.12	135.12	180.115	[M+H]+	3	15356-74-8	-	441861	404679	371740	938010	582092	650581	411199	416862	380862	-	-	-
MWSmce250	Butylidenephthalide	Others	Lactones	C12H12O2	189.09	128.06	188.084	[M+H]+	3	72917-31-8	C16924	589553	632898	432396	623968	996364	697340	1.11322e+06	745627	739467	-	C16924	-
mws0133	Nicotinamide	Others	Vitamin	C6H6N2O	123.06	80.05	122.048	[M+H]+	3	98-92-0	C00153	1.07337e+06	1.37149e+06	863141	1.43588e+06	1.44558e+06	1.42399e+06	1.02379e+06	1.05709e+06	1.02672e+06	ko00760,ko01100,ko01240	C00153	-
pme1383	Pyridoxine	Others	Vitamin	C8H11NO3	170.08	134.06	169.074	[M+H]+	3	65-23-6	C00314	2.33507e+06	2.0885e+06	2.02233e+06	4.31904e+06	4.75477e+06	4.98796e+06	1.96261e+06	1.96381e+06	1.82208e+06	ko00750,ko01100,ko01240	C00314	-
Hmjp000461	3-O-Glucoside-3-hydroxy-y-butyrolactone	Others	Lactones	C10H16O8	265.08	103.04	264.084	[M+H]+	2	-	-	167276	305156	276010	491924	422494	537105	188851	215233	168072	-	-	-
Lcfp121227	Pentaethyleneglycol	Others	Alcohol compounds	C10H22O6	239.15	89.06	238.142	[M+H]+	2	4792-15-8	-	639897	627398	575146	366488	613928	327850	722495	741376	618547	-	-	-
Wbsp000107	2-[(5s)-5-hydroxyhexa-1,3-dien-1-yl]-5-methoxy-4-[(3r)-3-methoxybutanoyl]-2-methylfuran-3-one	Others	Ketone compounds	C17H24O6	325.16	191.29	324.157	[M+H]+	3	-	-	1.10526e+06	1.57685e+06	1.424e+06	5.06162e+06	3.8079e+06	3.8897e+06	2.04165e+06	2.01427e+06	2.76627e+06	-	-	-
pme0490	Nicotinate	Others	Vitamin	C6H5NO2	124.04	78.03	123.032	[M+H]+	3	59-67-6	C00253	360728	353075	345973	456476	504495	502969	292781	283394	318813	ko00760,ko00960,ko01100,ko01110,ko01240	C00253	-
pma3101	Nicotinate D-ribonucleoside	Others	Vitamin	C11H14NO6+	256.08	124.04	256.082	[M]+	3	17720-18-2	C05841	1.00605e+06	1.26172e+06	1.22362e+06	652454	937862	922447	760539	1.00842e+06	1.05639e+06	ko00760,ko01100	C05841	-
Zkep00434	Turanose	Others	Saccharides	C12H22O11	365.11	203.05	342.116	[M+Na]+	2	547-25-1	C19636	2.55109e+07	1.54721e+07	1.70164e+07	1.1657e+07	1.46414e+07	2.40884e+07	1.41977e+07	1.36229e+07	1.27731e+07	-	C19636	-
Wcfp001236	Quinoline	Others	Others	C9H7N	130.06	103.05	129.058	[M+H]+	2	91-22-5	C06413	3.9628e+06	3.89417e+06	3.63855e+06	3.2253e+06	3.30503e+06	3.13667e+06	8.11884e+06	8.34862e+06	7.96038e+06	-	C06413	-
mws4174	N-Acetyl-D-mannosamine	Others	Saccharides	C8H15NO6	222.1	138.05	221.09	[M+H]+	3	7772-94-3	C00645	148826	104492	149709	109757	114388	106405	110126	93383.6	144397	ko00520,ko01100,ko01250	C00645	-
WaTKp02403	2-Phenylcycloprop-2-en-1-one	Others	Ketone compounds	C9H6O	131.05	103.05	130.042	[M+H]+	2	-	-	7.10654e+06	5.83153e+06	6.48963e+06	7.97274e+06	8.74295e+06	7.81715e+06	6.74972e+06	7.42651e+06	7.3435e+06	-	-	-
pmb0764	5-(2-Hydroxyethyl)-4-methylthiazole	Others	Others	C6H9NOS	144.05	113.03	143.041	[M+H]+	3	137-00-8	C04294	1.46332e+06	1.78544e+06	1.41915e+06	3.41527e+06	2.2961e+06	2.71345e+06	1.29363e+06	1.40346e+06	1.33131e+06	ko00730,ko01100,ko01240	C04294	-
Hmtp001106	Aquilegiolide	Others	Ketone compounds	C8H8O3	153.05	77.04	152.047	[M+H]+	2	94481-79-5	-	364066	324108	429318	452156	398972	397394	403667	335358	352825	-	-	-
Zmbp000449	Epigoitrin	Others	Others	C5H7NOS	130.03	70.07	129.025	[M+H]+	2	1072-93-1	-	2.2374e+06	2.44351e+06	2.36993e+06	9.54309e+06	9.52665e+06	8.89599e+06	3.89133e+06	4.26776e+06	4.12563e+06	-	-	-
Wcgp010436	3-(Cyclohexen-1-yl)-2-hydroxy-4a,5-dimethyl-2,3,4,5,6,8a-hexahydronaphthalen-1-one	Others	Others	C18H26O2	275.2	105.07	274.193	[M+H]+	3	-	-	1.03962e+06	867167	1.17172e+06	1.28379e+06	1.28752e+06	1.27073e+06	1.90259e+06	1.2169e+06	1.04525e+06	-	-	-
mws1337	Pantothenate	Others	Vitamin	C9H17NO5	220.12	90.05	219.111	[M+H]+	2	79-83-4	C00864	407894	408342	391084	445983	458586	483384	557674	499311	525130	ko00410,ko00770,ko01100,ko01110,ko01240	C00864	-
Lcfp121030	Furaneol4-glucoside	Others	Others	C12H18O8	291.11	129.06	290.1	[M+H]+	2	121063-56-7	-	1.62418e+06	1.40338e+06	1.4507e+06	1.77561e+06	1.47208e+06	1.49518e+06	1.67941e+06	1.70298e+06	1.82751e+06	-	-	-
Layp003558	3,4,5-Trimethoxyphenol-1-O-β-D-glucoside	Others	Others	C15H22O9	347.13	185.08	346.126	[M+H]+	3	-	-	260725	327125	290370	1.0689e+06	1.01638e+06	1.28423e+06	394630	512683	335778	-	-	-
Lcfp094149	10-hydroxy-6,10-dimethylundeca-5,8-dien-2-one	Others	Ketone compounds	C13H22O2	211.17	109.1	210.162	[M+H]+	1	65017-84-7	-	2.61664e+06	2.10903e+06	1.71923e+06	2.47442e+06	2.1118e+06	2.53592e+06	4.2027e+06	2.05286e+06	5.4613e+06	-	-	-
Waptp05012	2-(2-Methoxyphenyl)-1-(2,4,6-trihydroxyphenyl)ethanone*	Others	Stilbene	C15H14O5	275.09	107.05	274.084	[M+H]+	1	116854-95-6	-	8.49609e+06	7.91384e+06	7.40114e+06	3.77577e+06	3.17136e+06	3.83305e+06	6.35644e+06	4.95531e+06	6.7033e+06	-	-	-
Lmtp004146	Santalin*	Others	Ketone compounds	C15H14O5	275.09	107.05	274.084	[M+H]+	1	7400-10-4	-	8.58582e+06	8.35369e+06	7.31194e+06	3.75987e+06	3.00833e+06	3.25795e+06	6.21836e+06	5.37129e+06	6.19272e+06	-	-	-
Lssp210188	(7'R)-7'-Hydroxylariciresinol	Others	Others	C20H24O7	377.159	163.077	376.152	[M+H]+	3	-	-	110833	57092.3	64237.7	57165.5	66564.2	85000.8	80393.9	81568.5	121724	-	-	-
Lchp012009	Sedumoside H	Others	Others	C19H32O8	389.22	191.15	388.21	[M+H]+	3	-	-	1.83243e+06	2.42369e+06	1.42136e+06	2.50873e+06	1.65884e+06	2.04288e+06	1.2991e+06	1.52827e+06	1.59161e+06	-	-	-
mws2608	N-Acetyl-D-galactosamine	Others	Saccharides	C8H15NO6	222.1	84.05	221.09	[M+H]+	3	1811-31-0	C01132	405162	455414	363341	272302	288974	278960	631562	521704	494756	ko00052,ko00520,ko01100,ko01250	C01132	-
HX1124	1-Hydroxy-resveratrol	Others	Stilbene	C14H12O4	245.08	107.05	244.074	[M+H]+	3	-	-	517813	422188	351538	744342	638341	776211	355035	397508	422729	-	CM020259	MetMap152
Wcdp000839	5-methylfurfural	Others	Others	C6H6O2	111.04	55.05	110.037	[M+H]+	3	620-02-0	C11115	4.36878e+06	4.44188e+06	4.57692e+06	4.41791e+06	4.33997e+06	4.45406e+06	3.51364e+06	3.46826e+06	3.18937e+06	-	C11115	-
Lchp000218	(R)-3-ethyl-7-hydroxy-6-methoxyphthalide	Others	Lactones	C11H12O4	209.08	121.06	208.074	[M+H]+	2	-	-	2.18973e+06	2.79197e+06	2.53379e+06	4.85915e+06	3.28644e+06	4.96794e+06	2.61078e+06	2.72495e+06	4.06931e+06	-	-	-
MWSHC20102	3-Hydroxy-1-(4-Hydroxy-3-Methoxyphenyl)Propan-1-One	Others	Ketone compounds	C10H12O4	197.08	151.04	196.074	[M+H]+	2	2196-18-1	-	1.31834e+06	1.0101e+06	1.50328e+06	1.21997e+06	1.84188e+06	1.39522e+06	1.38343e+06	1.52268e+06	681795	-	-	-
Latp003160	6-Hydroxymellein	Others	Chromone	C10H10O4	195.06	117.03	194.057	[M+H]+	3	70901-60-9	C02379	2.01835e+06	1.65095e+06	1.7825e+06	1.36255e+06	1.79762e+06	1.80514e+06	1.33558e+06	1.13922e+06	1.03643e+06	-	C02379	-
Wbsp007290	Lycoposerramine E	Others	Ketone compounds	C17H24O3	277.18	137.06	276.173	[M+H]+	3	-	-	623606	637158	676838	647713	681426	650429	774419	775599	807795	-	-	-
Hmyp002315	3,5,7,4'-Tetrahydroxy-Coumaronochromone	Others	Chromone	C15H10O7	303.04	257.04	302.043	[M+H]+	1	-	-	7.80969e+06	6.30329e+06	7.71831e+06	8.3833e+06	6.32944e+06	8.64755e+06	5.71322e+06	5.56629e+06	6.28993e+06	-	-	-
Lssp210112	10β-Acetoxy-2α,5α,7β,9α-tetrahydroxytaxa-4(20),11-dien-13-one	Others	Others	C22H32O7	409.22	137.06	408.215	[M+H]+	3	-	-	3.41351e+06	2.79418e+06	4.03947e+06	2.12922e+06	1.82004e+06	2.99683e+06	3.31338e+06	2.64512e+06	3.43033e+06	-	-	-
Wcfp003695	Oleracone B	Others	Others	C13H18O2	207.14	95.08	206.131	[M+H]+	3	-	-	311364	285828	360121	240899	289764	240366	193062	218152	217070	-	-	-
Yaap004664	3-Oxo-Alpha-Ionol,4-(3-Hydroxy-1-Butenyl)-3,5,5-Trimethyl-2-Cyclohexen-1-One	Others	Others	C13H20O2	209.15	137.09	208.146	[M+H]+	3	110114-85-7	-	282344	347876	437640	538985	457494	482906	572254	601381	688078	-	-	-
mws0232	Riboflavin	Others	Vitamin	C17H20N4O6	377.15	243.09	376.138	[M+H]+	2	83-88-5	C00255	2.98203e+06	2.60988e+06	2.68591e+06	4.01577e+06	5.62313e+06	3.41013e+06	2.65735e+06	3.64273e+06	2.81776e+06	ko00740,ko01100,ko01110,ko01240,ko02010	C00255	-
Qmyp010506	2,4,6-Trihydroxybenzophenone	Others	Ketone compounds	C13H10O4	231.07	153.02	230.058	[M+H]+	3	3555-86-0	C06356	6.36109e+06	6.12265e+06	6.518e+06	9.1314e+06	5.33285e+06	8.84898e+06	1.36431e+07	9.49886e+06	1.56983e+07	-	C06356	-
Lazp010483	3,4-Dehydrotheaspirone	Others	Others	C13H18O2	207.14	147.12	206.13	[M+H]+	3	-	-	872545	594010	620372	535016	704206	715038	550952	555818	440727	-	-	-
Walbp05751	12-Hydroxy-4,4-bisnor-4,8,11,13-podocarpatetraen-3-one	Others	Others	C15H16O2	229.12	187.11	228.115	[M+H]+	3	-	-	407549	582243	376177	1.03048e+06	1.1356e+06	868903	656634	961531	1.02781e+06	-	-	-
zjbp110804	6,7-dimethoxy-2-[2-(4'-hydroxy-3'-methoxyphenyl)ethyl]chromone	Others	Chromone	C20H20O6	357.13	307.1	356.126	[M+H]+	3	-	-	527896	707186	709262	1.30564e+06	1.27695e+06	1.63785e+06	521960	459594	633057	-	-	-
Lmdp003146	4-(4-Hydroxyphenyl)-2-butanol	Others	Alcohol compounds	C10H14O2	167.11	93.07	166.099	[M+H]+	1	501-96-2	C17690	8.14652e+06	7.74005e+06	8.86022e+06	1.56577e+07	1.04515e+07	1.47276e+07	6.61086e+06	6.33614e+06	8.07407e+06	-	C17690	-
MWSmce285	Agarotetrol	Others	Chromone	C17H18O6	319.11	255.1	318.11	[M+H]+	3	69809-22-9	-	1.78248e+06	2.64858e+06	2.00289e+06	2.54012e+06	1.19448e+06	2.10442e+06	2.09427e+06	1.66504e+06	3.05019e+06	-	-	-
Lcfp197430	3,4-dihydroxyallylbenzene	Others	Others	C12H14O2	191.11	91.05	190.099	[M+H]+	3	-	-	2.15484e+06	1.36184e+06	1.63847e+06	969790	926121	1.10632e+06	457639	678356	570442	-	-	-
Lmsp102909	Deoxysappanol	Others	Others	C19H30O7	371.21	133.1	370.199	[M+H]+	3	-	-	164261	222655	302491	163231	173049	161520	187605	187835	156862	-	-	-
pme2289	Retinol	Others	Vitamin	C20H30O	287.24	119.09	286.23	[M+H]+	3	68-26-8	C00473	5.64728e+06	6.74968e+06	7.5202e+06	1.19624e+07	1.07985e+07	7.86071e+06	6.76433e+06	8.03203e+06	9.47013e+06	ko01100,ko01240	C00473	-
ZINC1691180	Methyl dehydroabietate	Others	Others	C21H30O2	315.23	133.1	314.225	[M+H]+	3	1235-74-1	-	5.32957e+06	6.42858e+06	4.95137e+06	7.17797e+06	7.24369e+06	6.88923e+06	4.45528e+06	4.21052e+06	3.68013e+06	-	-	-
pmp001230	Senkyunolide M	Others	Lactones	C16H22O4	279.16	121.03	278.152	[M+H]+	3	146986-60-9	-	82258.9	149330	201656	147176	148923	111153	75250.9	93561.6	101747	-	-	-
Wahlp02159	D-Pantothenic Acid 4'-O-Beta-Glucoside	Others	Vitamin	C15H27NO10	382.17	220.12	381.163	[M+H]+	1	29588-37-2	-	287572	177277	226442	191384	385762	258146	180382	195293	494907	-	-	-
Qmjp012113	Hypericumoxide N	Others	Others	C34H52O6	557.38	465.33	556.376	[M+H]+	3	-	-	157005	100585	67158.7	62004.9	44319.1	53121.8	47442.8	38644	89989.7	-	-	-
pme1261	Pantothenol	Others	Vitamin	C9H19NO4	206.14	76.08	205.131	[M+H]+	3	16485-10-2	C05944	34631.4	58397.6	52083.9	22898	25120.1	24532.9	21404.6	60132.3	28382.1	ko00770	C05944	-
Lhhp120812	Methylillicinone F*	Others	Others	C16H22O4	279.158	149.023	278.152	[M+H]+	1	-	-	261322	306238	294439	378026	488960	336101	319216	181378	225774	-	-	-
pmp000307	Sec-O-glucosylhamaudol	Others	Chromone	C21H26O10	439.16	259.1	438.153	[M+H]+	3	80681-44-3	C17484	485797	441661	418641	503245	344718	615216	429632	415680	545999	-	C17484	-
Zbzp011453	Des-O-Methyllasiodiplodin*	Others	Lactones	C16H22O4	279.16	149.03	278.152	[M+H]+	1	32885-82-8	-	397544	479368	554252	253419	308885	278069	322086	416238	225774	-	-	-
WaTKp01741	4-Ethynylbenzaldehyde	Others	Aldehyde compounds	C9H6O	131.05	103.05	130.042	[M+H]+	3	63697-96-1	-	1.48731e+06	1.36442e+06	1.38164e+06	1.28543e+06	1.57757e+06	1.36619e+06	1.39236e+06	1.46457e+06	1.20134e+06	-	-	-
WaTKp22296	8-phenyloct-7-enal	Others	Aldehyde compounds	C14H18O	203.14	105.07	202.136	[M+H]+	2	-	-	1.15357e+07	1.30362e+07	1.38964e+07	1.39144e+07	1.66183e+07	1.56583e+07	1.08641e+07	1.06246e+07	1.17348e+07	-	-	-
MWSHC2067	Protocatechualdehyde	Others	Aldehyde compounds	C7H6O3	139.04	65.04	138.032	[M+H]+	2	139-85-5	C16700	1.5836e+07	1.97494e+07	1.25056e+07	2.57806e+07	2.16526e+07	2.54907e+07	1.44258e+07	1.06655e+07	1.36836e+07	ko00950	C16700	-
WaTKp01218	2-(2-Ethynyl-2,4-cyclopentadien-1-ylidene)ethenol	Others	Alcohol compounds	C9H6O	131.05	103.05	130.042	[M+H]+	3	393561-91-6	-	5.47474e+06	5.68597e+06	2.06713e+06	4.17967e+06	2.68463e+06	3.84384e+06	4.90335e+06	5.29969e+06	2.01696e+06	-	-	-
MWSmce140	trans-Trimethoxyresveratrol	Others	Stilbene	C17H18O3	271.13	147.08	270.126	[M+H]+	3	22255-22-7	-	6.52074e+06	6.19987e+06	5.87267e+06	9.05083e+06	8.53255e+06	1.02559e+07	3.33856e+06	2.82954e+06	3.19506e+06	-	CM020275	MetMap152
pma0134	D-Threose	Others	Saccharides	C4H8O4	121.05	93.06	120.042	[M+H]+	3	95-43-2	C06463	5.41166e+06	5.47117e+06	4.05687e+06	2.65628e+06	2.77513e+06	2.7876e+06	2.16126e+06	1.7277e+06	1.91557e+06	-	C06463	-
Zmzp006646	Capillarisin	Others	Chromone	C16H12O7	317.07	302.04	316.058	[M+H]+	3	56365-38-9	C08999	3.22712e+06	3.27271e+06	3.15846e+06	4.6386e+06	4.65296e+06	4.48965e+06	2.08516e+06	2.2609e+06	2.19547e+06	-	C08999	-
Zbkp011408	Neoabietic acid	Others	Others	C20H30O2	303.23	123.12	302.225	[M+H]+	3	471-77-2	C11889	6.2717e+07	4.73273e+07	5.26742e+07	6.29744e+07	4.18568e+07	6.27905e+07	5.31405e+07	5.84591e+07	4.77505e+07	ko00904,ko01110	C11889	-
MWS20172	5-Hydroxymethyl-2-furaldehyde*	Others	Aldehyde compounds	C6H6O3	127.04	53.04	126.032	[M+H]+	2	67-47-0	C11101	758211	1.29112e+06	1.35871e+06	1.38696e+06	654493	1.46505e+06	248683	349516	429010	-	C11101	-
Cmsp002787	3,4'-Dihydroxy-3',5'-dimethoxypropiophenone	Others	Ketone compounds	C11H14O5	227.09	181.05	226.084	[M+H]+	2	136196-47-9	-	6.47249e+06	9.10744e+06	6.8621e+06	5.49817e+06	5.45433e+06	4.3222e+06	2.42116e+06	3.11746e+06	3.10792e+06	-	CM01686	MetMap139
MWSmce446	Cimifugin-7-O-glucoside	Others	Chromone	C22H28O11	469.17	307.12	468.163	[M+H]+	2	80681-45-4	-	1.48262e+06	1.00742e+06	1.57211e+06	2.30849e+06	1.482e+06	2.78614e+06	905225	585751	800947	-	-	-
HX1188	1,7-Bis-(3,4-dihydroxyphenyl)-5-methoxy-3-heptanone	Others	Ketone compounds	C20H24O6	361.16	189.09	360.157	[M+H]+	2	-	-	230072	241077	190566	224108	169755	146513	257136	147700	67058.1	-	-	-
Lmmp003517	Solatuberenol A	Others	Others	C13H20O3	225.15	95.08	224.141	[M+H]+	3	-	-	290384	197923	258332	489993	263140	284347	555563	399115	486798	-	-	-
Latp004456	2,5-Dimethyl-7-hydroxychromone	Others	Chromone	C11H10O3	191.07	176.05	190.062	[M+H]+	2	38412-47-4	-	1.23818e+06	992853	968888	1.34267e+06	1.81249e+06	986282	1.17403e+06	1.63892e+06	962006	-	-	-
Lssp210123	α-Conidendrin	Others	Others	C20H20O6	357.13	137.06	356.126	[M+H]+	3	-	-	2.07706e+06	1.97052e+06	1.8521e+06	3.78377e+06	4.14723e+06	3.85046e+06	3.37551e+06	3.43443e+06	3.58497e+06	-	-	-
Qacp006459	1,7-Dihydroxy-3,4-dimethoxyxanthone-glucoside	Others	Xanthone	C21H22O11	451.12	289.07	450.116	[M+H]+	3	-	-	487002	482977	209587	278219	299959	311272	689980	353071	397230	-	-	-
MWS1939	Fluoren-9-one	Others	Ketone compounds	C13H8O	181.06	152.06	180.058	[M+H]+	3	486-25-9	C06712	157180	255805	110061	122332	202460	125982	197652	101905	146529	ko01100	C06712	-
MWS20185	[6]-Gingerol	Others	Ketone compounds	C17H26O4	295.19	137.06	294.183	[M+H]+	3	23513-14-6	C10462	45038.6	47009.5	73839.8	74937.6	38350.7	60042.1	47426.4	68020.9	89307.1	ko00945,ko01110	C10462	-
Yalp002169	Schumanniofioside A	Others	Chromone	C16H18O9	355.1	193.05	354.095	[M+H]+	3	128396-15-6	-	1.25219e+06	1.38412e+06	1.26679e+06	620945	701066	688699	677346	569469	601761	-	-	-
Layp007735	Batatasin IV	Others	Stilbene	C15H16O3	245.12	121.06	244.11	[M+H]+	3	60347-67-3	C10247	3.02194e+06	2.90829e+06	2.72632e+06	1.97391e+06	1.90329e+06	1.78712e+06	2.34718e+06	2.16521e+06	2.46737e+06	-	C10247	-
Zahp009018	3,4-Methylenedioxypropiophenone	Others	Others	C10H10O3	179.07	119.05	178.063	[M+H]+	3	28281-49-4	-	1.26581e+06	795673	1.11001e+06	810343	1.14982e+06	823640	1.01451e+06	665326	820190	-	-	-
Jmlp004238	Byzantionoside A	Others	Ketone compounds	C19H30O7	371.2	133.1	370.199	[M+H]+	3	189109-41-9	-	132188	67126.3	126312	94714.7	126238	81935.2	59781	69692.2	72615.1	-	-	-
MWSmce161	Gigantol(3,3'-Dihydroxy-5,4'-dimethoxybibenzyl)*	Others	Stilbene	C16H18O4	275.12	137.06	274.12	[M+H]+	3	67884-30-4	-	959983	902046	969546	1.73548e+06	1.93868e+06	1.86866e+06	893311	806028	856166	-	CM020281	MetMap152
MWSmce680	Mequinol	Others	Others	C7H8O2	125.06	110.04	124.052	[M+H]+	3	150-76-5	-	468117	388878	663137	203175	340176	253684	236123	261880	153392	-	-	-
Lmbp002309	Sinapaldehyde-4-O-Glucoside	Others	Aldehyde compounds	C17H22O9	371.1	209.05	370.126	[M+H]+	2	154461-65-1	-	39927.4	39927.4	39927.4	426103	493848	199637	469090	357991	328232	-	-	-
Zblp007216	3,4-Dihydroxy-5,4'-dimethoxybibenzyl*	Others	Stilbene	C16H18O4	275.13	137.06	274.12	[M+H]+	3	-	-	849558	853831	958405	1.92353e+06	1.86276e+06	2.01805e+06	979884	832943	879063	-	-	-
Wcgp009045	4-[(2R,4bR,7S)-7-hydroxy-2,4b-dimethyl-2,3,4,4a,5,6,7,8,10,10a-decahydro-1H-phenanthren-1-yl]butan-2-one	Others	Others	C20H32O2	305.25	121.1	304.24	[M+H]+	3	-	-	768283	571230	523245	453646	477455	525271	470680	597285	915060	-	-	-
Wbtp005510	Methyl 8-hydroxy-2-methoxy-6-methyl-9-oxoxanthene-1-carboxylate	Others	Xanthone	C17H14O6	315.09	315.08	314.079	[M+H]+	3	-	-	6.25043e+06	6.25043e+06	6.25043e+06	6.02362e+07	5.8139e+07	7.71566e+07	3.12522e+07	3.38391e+07	4.11994e+07	-	-	-
Lmtp004382	Sinapoyl aldehyde	Others	Aldehyde compounds	C11H12O4	209.08	149.06	208.074	[M+H]+	3	4206-58-0	C05610	196940	319654	265520	291034	332375	240021	321456	310089	251376	ko00940,ko01100,ko01110	C05610	-
Zamp003418	Paeonoside	Others	Others	C15H20O8	329.12	167.07	328.116	[M+H]+	2	20309-70-0	C10717	325662	305902	368320	348277	334418	535382	389663	590221	299486	-	C10717	-
Lmjp101403	3ξ-(1ξ-Hydroxyethyl)-7-hydroxy-1-isobenzofuranone	Others	Others	C10H10O4	195.07	117.03	194.058	[M+H]+	3	-	-	21934.1	21934.1	21934.1	160718	109670	213800	177714	221704	260101	-	-	-
Zjtp092402	3,4'-dihydroxy-5-methoxybibenzyl	Others	Stilbene	C15H16O3	245.12	151.07	244.11	[M+H]+	3	67884-29-1	-	432077	439533	289542	1.61652e+06	1.64546e+06	1.6931e+06	44075.8	76409.8	122565	-	CM020261	MetMap152
Lmdp002901	2,6-Dihydroxy-4-isopropylphenyl-1-O-β-D-glucoside	Others	Others	C15H22O8	331.14	151.07	330.132	[M+H]+	3	-	-	1.38021e+06	1.09027e+06	704939	755312	1.34691e+06	976525	856225	1.07471e+06	1.47398e+06	-	-	-
Hmqp001042	Butyl beta-D-glucoside	Others	Saccharides	C10H20O6	237.13	98.97	236.126	[M+H]+	3	5391-18-4	-	44819.8	22158.6	38055.4	4431.72	4431.72	4431.72	46348.2	36718.1	36018.9	-	-	-
Wcdp000970	acetophenone	Others	Others	C8H8O	121.06	103.05	120.058	[M+H]+	3	98-86-2	C07113	602642	539388	562032	740287	767313	815383	356100	287549	372718	-	C07113	MetMap139
Zmgp002799	5-hydroxy-1-(4-hydroxyphenyl)-7-(4-hydroxy-3-methoxyphenyl)-3-heptanone	Others	Ketone compounds	C20H24O5	345.17	327.16	344.162	[M+H]+	3	-	-	200536	436372	389083	554760	747020	879259	526407	421023	541896	-	-	-
Wcsp010025	Dictyolactone	Others	Others	C20H30O2	303.23	119.09	302.225	[M+H]+	3	-	-	4.93384e+06	5.58103e+06	4.91634e+06	6.47816e+06	6.57627e+06	6.47642e+06	5.1156e+06	4.53093e+06	6.43627e+06	-	-	-
Lcfp228111	11,12-cis-13,14-Dihydroretinol	Others	Alcohol compounds	C20H32O	289.25	95.09	288.245	[M+H]+	1	115797-14-3	C15492	748422	569063	540870	550015	708571	634793	807652	500542	706717	-	C15492	-
Zmcp102202	Senkyunolide C*	Others	Lactones	C12H12O3	205.09	149.02	204.079	[M+H]+	2	-	-	408905	408905	408905	2.04452e+06	6.75156e+06	2.12809e+06	3.12848e+06	3.26188e+06	3.02116e+06	-	-	-
WaTKp05402	3-Ethynylbenzaldehyde	Others	Aldehyde compounds	C9H6O	131.05	77.04	130.042	[M+H]+	3	77123-56-9	-	2.40803e+07	2.39662e+07	2.34868e+07	4.69736e+06	4.69736e+06	4.69736e+06	2.63194e+07	2.75718e+07	2.59275e+07	-	-	-
Lcfp067444	6,9-dihydroxymegastigmasta-5,7-dien-3-one9-O-beta-D-gentiobioside	Others	Others	C25H40O13	549.26	207.14	548.247	[M+H]+	3	-	-	67490.5	65488.7	27927.5	51051.2	19036.3	47485.5	3807.26	3807.26	3807.26	-	-	-
Safp003571	5-Formylbenzofuran	Others	Others	C9H6O2	147.04	91.05	146.037	[M+H]+	1	10035-16-2	-	106296	143947	134598	84807.6	153753	132365	70041.6	104970	111919	-	-	-
Lcfp199969	Dehydronerolisovalerate	Others	Others	C15H24O2	237.18	135.12	236.178	[M+H]+	2	49831-79-0	-	137254	212640	240920	198583	213337	294603	324190	169553	221751	-	-	-
Lmtp005493	4,4'-Dihydroxy-3,5-dimethoxybibenzyl	Others	Stilbene	C16H18O4	275.13	135.08	274.12	[M+H]+	3	39499-96-2	C10256	70805.8	70805.8	70805.8	943958	851458	889360	1.31536e+06	715724	998172	-	C10256	MetMap152
Lhmp101304	Ranunculinin glucoside*	Others	Others	C11H16O8	277.09	115.04	276.084	[M+H]+	3	-	-	456345	493994	418233	1.46686e+06	1.38994e+06	1.38901e+06	47471.9	47471.9	47471.9	-	-	-
HX1346	ranunculin*	Others	Others	C11H16O8	277.09	115.04	276.084	[M+H]+	3	-	C08512	456345	493994	418233	1.46686e+06	1.38994e+06	1.38901e+06	47471.9	47471.9	47471.9	-	C08512	-
Layp002880	5,7-Dihydroxychromone glucoside	Others	Chromone	C15H16O9	341.09	179.03	340.079	[M+H]+	2	-	-	244089	307816	400322	200242	319355	299821	40048.5	40048.5	40048.5	-	-	-
Wazcp04835	Phycoerythrobilin	Others	Others	C33H38N4O6	587.29	464.22	586.279	[M+H]+	2	18097-67-1	C05912	201169	265156	314814	2.23631e+06	1.75686e+06	1.82237e+06	476997	852375	681886	ko00860,ko01110	C05912	-
Sasp001756	Itoside L	Others	Others	C12H20O8	310.15	131.07	292.116	[M+NH4]+	3	-	-	20758.4	83101	47242.7	77413.8	75508.8	50190.5	61985.3	47073.5	47044.6	-	-	-
pme2596	4-Pyridoxate	Others	Vitamin	C8H9NO4	184.06	148.04	183.053	[M+H]+	3	82-82-6	C00847	12018.1	12018.1	12018.1	60090.4	97277.3	66595.5	12018.1	12018.1	12018.1	ko00750,ko01100	C00847	-
Wmcp000010	Sammangaoside A	Others	Others	C19H32O8	389.22	209.15	388.21	[M+H]+	3	-	-	84443.6	169610	142498	409945	354627	267043	209273	212688	142280	-	-	-
pme2828	4-Nitrophenol	Others	Others	C6H5NO3	140.03	98.96	139.027	[M+H]+	3	100-02-7	C00870	186869	186869	186869	186869	186869	186869	1.17648e+06	1.12265e+06	934346	-	C00870	-
Zbkp011549	Palustric acid	Others	Others	C20H30O2	303.23	149.13	302.225	[M+H]+	3	1945-53-5	C12077	1.47253e+07	1.02834e+07	1.32986e+07	1.3182e+07	1.79158e+07	1.28482e+07	2.69759e+07	2.08628e+07	1.40532e+07	ko00904,ko01110	C12077	-
MWSslk209	Rhapontin	Others	Stilbene	C21H24O9	421.15	259.1	420.142	[M+H]+	3	155-58-8	C10288	4.84981e+06	4.43269e+06	4.28189e+06	3.70915e+06	3.78514e+06	4.28423e+06	3.05676e+06	3.27624e+06	2.96139e+06	-	C10288	MetMap152
Wcgp009121	7-Ethenyl-2,6-dihydroxy-1,1,4a,7-tetramethyl-2,4,4b,5,6,8,10,10a-octahydrophenanthren-3-one	Others	Others	C20H30O3	319.23	273.22	318.219	[M+H]+	3	-	-	4.31193e+07	5.06308e+07	5.4336e+07	2.91524e+07	3.19274e+07	4.22253e+07	3.83777e+07	4.40026e+07	3.83692e+07	-	-	-
Qacp006433	1,3-Dihydroxy-2-methoxyxanthone-glucoside	Others	Xanthone	C20H20O10	421.11	259.06	420.106	[M+H]+	3	-	-	154678	210390	214003	30935.5	30935.5	30935.5	30935.5	30935.5	30935.5	-	-	-
Waptp00696	1,5-Anhydro-D-fructose	Others	Saccharides	C6H10O5	163.06	69.03	162.053	[M+H]+	3	75414-43-6	C06485	224787	256740	222889	165190	170297	148264	169821	173450	192069	-	C06485	-
Lafp002342	2,3-Dihydroxy-1-(4-hydroxy-3,5-dimethoxyphenyl)propan-1-one	Others	Ketone compounds	C11H14O6	243.09	140.05	242.078	[M+H]+	3	33900-74-2	-	4187.88	4187.88	4187.88	4187.88	4187.88	4187.88	20939.4	45839.4	40522	-	-	-
Cmsp006710	3',4-Dihydroxy-3,5'-dimethoxybibenzyl*	Others	Stilbene	C16H18O4	275.13	137.06	274.12	[M+H]+	3	83088-28-2	-	733169	862007	1.04153e+06	1.88484e+06	1.85913e+06	2.11051e+06	884298	908864	860381	-	CM020284	MetMap152
Zbjp002769	1,7-bis(4-hydroxypheny)hept-1-ene-3,5-diol	Others	Ketone compounds	C19H22O4	315.158	133.064	314.152	[M+H]+	3	-	-	4.37081e+06	3.17425e+06	3.59933e+06	3.14525e+06	2.90896e+06	3.27839e+06	2.77361e+06	2.14532e+06	2.85435e+06	-	-	-
Wcfp008156	8-[3-oxo-2-[(E)-pent-2-enyl]cyclopenten-1-yl]octanoic acid	Others	Others	C18H28O3	293.21	81.07	292.204	[M+H]+	3	-	-	413257	453263	408460	311475	406377	293542	182626	244623	276838	-	-	-
Zmgp003417	1-(4-hydroxyphenyl)-7-phenylhepta-3,5-dione	Others	Ketone compounds	C19H20O3	297.15	107.05	296.141	[M+H]+	3	-	-	5.30925e+06	5.51903e+06	5.18008e+06	5.0554e+06	4.96288e+06	5.13402e+06	2.19612e+06	2.27473e+06	2.53967e+06	-	-	-
WaYp007725	2-O-(Feruloyl) Dihydroxyacetophenone	Others	Ketone compounds	C18H16O6	329.1	121.03	328.095	[M+H]+	3	-	-	76055	76055	76055	757231	655229	380275	76055	76055	76055	-	-	-
Yamp001634	dehydroconiferyl alcohol	Others	Others	C10H10O3	179.07	91.05	178.063	[M+H]+	3	-	-	1027.67	1027.67	1027.67	14828	5138.36	11560.9	1027.67	1027.67	1027.67	-	-	-
pmp000604	Rubrofusarin-6-O-glucoside*	Others	Ketone compounds	C21H22O10	435.13	273.07	434.121	[M+H]+	3	132922-80-6	-	242390	162667	208585	227620	344187	363655	350857	484200	563589	-	-	-
MWSmce389	Beta-asarone	Others	Others	C12H16O3	209.12	179.07	208.11	[M+H]+	3	5273-86-9	C10430	1.40055e+06	1.17096e+06	1.44547e+06	1.91689e+06	1.92783e+06	1.80834e+06	893099	579187	860116	-	C10430	-
pme2266	Biotin	Others	Vitamin	C10H16N2O3S	245.1	227.08	244.088	[M+H]+	2	58-85-5	C00120	1.76252e+06	1.32052e+06	1.45867e+06	264105	264105	264105	1.74098e+06	2.12654e+06	1.93369e+06	ko00780,ko01100,ko01240,ko02010	C00120	-
mws1611	Z-Ligustilide	Others	Lactones	C12H14O2	191.11	117.07	190.099	[M+H]+	3	4431-01-0	C16987	203769	173096	202859	357896	239824	142587	69516.6	257015	270737	-	C16987	-
Zmwp006493	8-Hydroxylindestenolide	Others	Lactones	C15H18O3	247.13	201.13	246.126	[M+H]+	2	-	-	6.78231e+06	6.52804e+06	5.89914e+06	5.75638e+06	5.49999e+06	4.47326e+06	7.43515e+06	5.59258e+06	8.23161e+06	-	-	-
pmp001227	Senkyunolide	Others	Lactones	C12H16O2	193.12	105.04	192.115	[M+H]+	3	63038-10-8	C17853	1.31981e+07	1.60132e+07	1.64074e+07	2.02617e+07	1.64116e+07	2.30101e+07	1.15502e+07	1.11161e+07	1.085e+07	-	C17853	-
Qmjp011019	Petiolin E	Others	Others	C19H24O9	397.15	235.1	396.142	[M+H]+	3	-	-	1.73855e+06	1.61134e+06	1.75776e+06	1.14169e+06	1.14488e+06	1.04345e+06	2.00522e+06	2.76875e+06	2.71742e+06	-	-	-
Wbtp004815	5-hydroxy-6,8-dimethoxy-2,3-dimethylbenzo[g]chromen-4-one	Others	Xanthone	C17H16O5	301.1	301.07	300.1	[M+H]+	3	-	-	4.62888e+06	3.56202e+06	5.91258e+06	1.10626e+07	1.46394e+07	9.08409e+06	712403	712403	712403	-	-	-
HX1312	Precocene II	Others	Others	C13H16O3	221.12	151.08	220.11	[M+H]+	3	644-06-4	C09018	141615	87111.3	84619.4	167354	141082	151488	398955	227554	158721	-	C09018	-
Sasp003574	Grevilloside B	Others	Others	C17H26O8	359.17	197.12	358.163	[M+H]+	3	-	-	22904	22904	22904	310669	114520	180771	22904	22904	22904	-	-	-
Lcfp224172	Dipropyleneglycoldibenzoate*	Others	Others	C20H22O5	343.15	163.08	342.147	[M+H]+	1	20109-39-1	-	4434.34	4434.34	4434.34	4434.34	4434.34	4434.34	68410.9	42819.2	75930.9	-	-	-
Lhfp112926	Myricatomentogenin*	Others	Others	C20H22O5	343.15	163.08	342.147	[M+H]+	1	-	-	4434.34	4434.34	4434.34	4434.34	4434.34	4434.34	68410.9	42819.2	75930.9	-	-	-
Zmgp004718	1-(4-hydroxy-3-methoxyphenyl)-7-phenyl-3,5-diheptanone	Others	Ketone compounds	C20H22O4	327.16	137.06	326.152	[M+H]+	3	-	-	124508	108204	94593.3	158580	92454.9	100476	18491	18491	18491	-	-	-
Lcfp121029	4-O-beta-L-Galactopyranosyl-3,6-anhydro-L-galactose	Others	Saccharides	C12H20O10	325.11	163.06	324.106	[M+H]+	2	-	-	1.07131e+06	1.02138e+06	1.13833e+06	99894.3	99894.3	99894.3	1.0716e+06	962862	499472	-	-	-
zjbp110802	7-hydroxy-6-methoxy-2-[2-(3'-hydroxy-4'-methoxyphenyl)ethyl]chromone	Others	Chromone	C19H18O6	343.12	137.06	342.11	[M+H]+	3	-	-	126046	152569	120797	139498	253534	262678	118012	122043	150979	-	-	-
Lmyp003951	3,4-Dihydroxy-3-methoxypropiophenone	Others	Ketone compounds	C11H14O5	227.09	181.09	226.084	[M+H]+	3	-	-	626829	495381	1.19239e+06	724305	1.12839e+06	999132	572754	823948	432685	-	-	-
Zjtp092403	3,4'-dihydroxy-4,5-dimethoxybibenzyl	Others	Stilbene	C16H18O4	275.13	121.06	274.12	[M+H]+	3	-	-	107447	107447	107447	1.16875e+06	1.51506e+06	1.61392e+06	107447	107447	107447	-	CM020286	MetMap152
HX1282	Sarisan	Others	Others	C11H12O3	193.09	133.06	192.079	[M+H]+	3	18607-93-7	C10493	50015.3	50015.3	50015.3	498485	305413	434050	554422	250076	300597	-	C10493	-
Wcdp003593	2-(3,4-dihydroxyphenyl)-4-[2-(3,4-dihydroxyphenyl)-3,5,7-trihydroxy-3,4-dihydro-2h-1-benzopyran-8-yl]-3,4-dihydro-2h-1-benzopyran-3,5,7-triol	Others	Others	C30H26O12	579.15	409.09	578.142	[M+H]+	3	-	-	3.16916e+07	2.42924e+07	5.51654e+07	6.72888e+07	5.72343e+07	5.62128e+07	5.44301e+07	7.81328e+07	4.10525e+07	-	-	-
MWSmce463	Mesitaldehyde	Others	Aldehyde compounds	C10H12O	149.1	65.04	148.089	[M+H]+	3	487-68-3	-	387220	375644	419243	46598	46598	46598	631435	702094	749699	-	-	-
WaTKp05525	4a-Methyl-4a,5,8,8a-tetrahydro-2(1H)-naphthalenone	Others	Ketone compounds	C11H14O	163.11	79.05	162.105	[M+H]+	3	17429-21-9	-	246377	246377	246377	246377	246377	246377	1.86635e+06	2.3642e+06	1.90082e+06	-	-	-
Lssp210198	2α,7β,13α-Triacetoxy-5α,9α-Dihydroxy-2(3→20)paclitaxel-4(20),11-diene-10-one	Others	Others	C26H36O9	493.24	313.18	492.236	[M+H]+	3	-	-	7826.75	7826.75	7826.75	7826.75	7826.75	7826.75	39133.8	93346.2	70669.3	-	-	-
Lcfp121048	hex-2-enylbenzoate	Others	Others	C13H16O2	205.12	105.03	204.115	[M+H]+	2	28343-61-5	-	142941	142941	142941	142941	142941	142941	1.71861e+06	1.88446e+06	2.07709e+06	-	-	-
Lmbn000198	3-Dehydro-L-threonate	Others	Saccharides	C4H6O5	133.01	71.01	134.022	[M-H]-	1	-	C03064	989121	965723	907277	1.99949e+06	1.88294e+06	1.9751e+06	1.80287e+06	1.73865e+06	1.6986e+06	ko00053,ko01100	C03064	-
MWSmce576	L-Glucose*	Others	Saccharides	C6H12O6	179.056	59.0141	180.063	[M-H]-	1	921-60-8	-	2.52001e+06	2.46876e+06	3.26843e+06	3.34831e+06	3.56419e+06	2.95737e+06	3.68716e+06	4.1609e+06	4.15046e+06	-	-	-
mws4170	D-Glucose*	Others	Saccharides	C6H12O6	179.056	59.0139	180.063	[M-H]-	1	14431-43-7	C00031	2.40505e+06	2.46504e+06	3.29961e+06	3.52191e+06	2.8044e+06	3.10673e+06	4.4895e+06	3.9974e+06	4.50303e+06	ko00010,ko00030,ko00052,ko00500,ko00520,ko00524,ko00901,ko01100,ko01110,ko02010,ko04148	C00031	-
Zamn00402	sorbose*	Others	Saccharides	C6H12O6	179.06	59.01	180.063	[M-H]-	1	-	-	2.52001e+06	2.46876e+06	3.26843e+06	3.34831e+06	3.56419e+06	2.95737e+06	3.68716e+06	4.1609e+06	4.15046e+06	-	-	-
pmf0139	D-Galactose*	Others	Saccharides	C6H12O6	179.06	59.01	180.063	[M-H]-	1	59-23-4	C00124	3.07748e+06	3.01556e+06	2.96977e+06	3.68334e+06	2.71203e+06	3.2996e+06	4.54578e+06	3.99713e+06	4.04129e+06	ko00052,ko01100	C00124	-
mws1164	D-Fructose*	Others	Saccharides	C6H12O6	179.06	59.01	180.063	[M-H]-	1	57-48-7	C05003	2.40505e+06	2.46504e+06	3.29961e+06	3.52191e+06	2.8044e+06	3.10673e+06	4.4895e+06	3.9974e+06	4.50303e+06	-	C05003	-
mws0214	D-Sorbitol	Others	Saccharides	C6H14O6	181.07	71.01	182.079	[M-H]-	3	50-70-4	C00794	126012	121018	127523	177874	186398	184991	160946	163194	172390	ko00051,ko00052,ko01100,ko02010	C00794	-
mws0213	Ribitol	Others	Saccharides	C5H12O5	151.061	71	152.068	[M-H]-	3	488-81-3	C00474	4.81619e+06	4.44062e+06	4.74041e+06	1.59008e+06	1.58367e+06	1.66952e+06	4.82276e+06	4.19344e+06	4.44482e+06	ko00040,ko00740,ko01100	C00474	-
Wasn000495	Vicianose	Others	Saccharides	C11H20O10	311.1	89.02	312.106	[M-H]-	3	14116-69-9	C01625	1.36339e+06	1.42619e+06	1.35191e+06	1.48769e+06	1.43576e+06	1.56489e+06	1.20971e+06	1.20113e+06	1.26478e+06	-	C01625	-
MWSmce690	Erythorbic Acid; Isoascorbic Acid	Others	Vitamin	C6H8O6	175.02	59.01	176.032	[M-H]-	1	89-65-6	C20364	3.22704e+06	3.30141e+06	3.78767e+06	3.01978e+06	2.854e+06	3.01257e+06	5.81259e+06	6.51798e+06	7.83688e+06	-	C20364	-
Zmgn000173	D-Ribose	Others	Saccharides	C5H10O5	149.05	75.01	150.053	[M-H]-	1	50-69-1	C00121	744786	778390	949971	1.29274e+06	1.11227e+06	1.28733e+06	998626	876787	916924	ko00030,ko01100,ko02010	C00121	-
MWSmce466	4-Hydroxyacetophenone	Others	Ketone compounds	C8H8O2	135.05	92.03	136.052	[M-H]-	3	99-93-4	C10700	156208	111687	104287	110294	154337	195290	156167	124552	138961	ko01100	C10700	MetMap139
pme0534	D-Gluconic acid	Others	Saccharides	C6H12O7	195.05	75.01	196.058	[M-H]-	1	526-95-4	C00257	190063	248247	229255	452581	465470	456624	1.44355e+06	1.47281e+06	1.50346e+06	ko00030,ko01100,ko01110,ko01200	C00257	-
Walbn00444	6''-Carboxyraffinose	Others	Saccharides	C18H30O17	517.14	175.02	518.148	[M-H]-	1	104880-42-4	-	576912	620352	581241	333228	306807	359956	1.05252e+06	906870	1.00083e+06	-	-	-
Wasn001446	Glucosyl 6-methylhept-6-ene-1,2,3,4,5-pentaol	Others	Others	C14H26O10	353.15	173.08	354.153	[M-H]-	2	-	-	811381	970315	767061	1.26753e+06	1.3975e+06	1.14658e+06	601431	773255	698345	-	-	-
Zjbn102515	3-hydroxy-5-methoxybibenzyl	Others	Stilbene	C15H16O2	227.11	212.08	228.115	[M-H]-	3	-	-	3.47483e+06	3.14866e+06	3.56769e+06	5.2756e+06	5.26115e+06	5.20828e+06	2.10161e+06	2.53029e+06	2.7621e+06	-	-	-
Zjbn102516	3,3'-Dihydroxy-5-methoxybibenzyl	Others	Stilbene	C15H16O3	243.1	227.07	244.11	[M-H]-	1	-	-	693185	875755	845998	3.63109e+06	3.31063e+06	3.74355e+06	242601	222462	253179	-	-	-
Wasn000977	4-O-galactopyranosylxylose	Others	Saccharides	C11H20O10	311.1	89.24	312.106	[M-H]-	2	14087-31-1	-	316292	341779	321942	351805	391271	335055	274392	320371	239229	-	-	-
Zazn006864	Nor-toralactone	Others	Others	C14H10O5	257.04	213.06	258.053	[M-H]-	3	-	-	1.59402e+06	1.65603e+06	1.7442e+06	5.65007e+06	5.90951e+06	6.15028e+06	750401	717986	895649	-	-	-
Lmbn001930	Salicylaldehyde	Others	Aldehyde compounds	C7H6O2	121.03	77.04	122.037	[M-H]-	3	90-02-8	C06202	265163	214762	260445	333611	345733	410751	236650	213546	231970	ko01100	C06202	-
Lcfn240746	geranyltrans-p-hydroxycinnamate	Others	Others	C19H24O3	299.17	145.03	300.173	[M-H]-	1	-	-	567220	541169	565022	761030	741374	724661	958075	1.00114e+06	1.00194e+06	-	-	-
MWSslk092	(-)-Usnic acid	Others	Ketone compounds	C18H16O7	343.08	328.06	344.09	[M-H]-	1	125-46-2	C10101	139777	53464.3	175698	25301.2	27413.5	28169.7	38633	40173.6	35978.7	-	C10101	-
Wcsn009515	Methyl (2E,4E,9E)-5,9,13-trimethyltetradeca-2,4,9,12-tetraenoate	Others	Others	C18H28O2	275.2	231.21	276.209	[M-H]-	3	-	-	63080.6	48852.7	54773.1	42285.6	18280.5	51099.2	20678.6	40237.8	34433.8	-	-	-
Lmbn013410	2,4-Di-Tert-Butylphenol	Others	Others	C14H22O	205.16	189.13	206.167	[M-H]-	3	96-76-4	-	1.9346e+06	2.25481e+06	2.11854e+06	2.07361e+06	2.10518e+06	2.16972e+06	2.52031e+06	2.58069e+06	2.64198e+06	-	-	-
MWS2066	1-Naphthol*	Others	Others	C10H8O	143.05	115.06	144.058	[M-H]-	3	90-15-3	C11714	10792.9	12885	16555.6	18886.9	36213.4	16594.1	15284.9	28987	15954.4	-	C11714	-
MWS1875	2-Naphthol*	Others	Others	C10H8O	143.05	115.05	144.058	[M-H]-	3	135-19-3	C11713	10792.9	12885	16555.6	18886.9	36213.4	16594.1	15284.9	28987	15954.4	-	C11713	-
Zbsn004080	Kakispyrone	Others	Others	C19H20O9	391.1	229.05	392.111	[M-H]-	3	-	-	6.05329e+06	6.71134e+06	6.0212e+06	8.11085e+06	8.03477e+06	8.42146e+06	1.26433e+07	1.27242e+07	1.1378e+07	-	-	-
Labn004625	2-Phenylethyl beta-primeveroside	Others	Alcohol compounds	C19H28O10	415.16	89.02	416.168	[M-H]-	3	129932-48-5	-	980885	1.03067e+06	875047	670564	648954	662247	279145	280283	366543	-	-	-
pmn001681	1-(4-Methoxyphenyl)-1-propanol	Others	Alcohol compounds	C10H14O2	165.09	149.06	166.099	[M-H]-	3	5349-60-0	-	166473	177521	154639	167691	182196	147111	163719	171436	179201	-	-	-
Jmzn006005	3,4-methylenedioxy cinnamyl alcohol	Others	Alcohol compounds	C10H10O3	177.06	117.04	178.063	[M-H]-	3	17581-86-1	-	42800.3	40973.9	54051.4	77347	51838	73507.7	97622.4	80455.6	75759.7	-	-	-
pmf0175	2-Decanol*	Others	Alcohol compounds	C10H22O	157.16	157.16	158.167	[M-H]-	3	1120-06-5	-	1.07408e+06	936616	969797	1.16165e+06	815854	1.00984e+06	1.13799e+06	1.1058e+06	1.02077e+06	-	-	-
Zmfn007930	aloifol I	Others	Stilbene	C16H18O4	273.11	121.03	274.12	[M-H]-	3	-	-	271295	288069	313414	645173	673916	712744	328127	284462	312904	-	CM020283	MetMap152
pmf0174	1-Decanol*	Others	Alcohol compounds	C10H22O	157.16	157.16	158.167	[M-H]-	3	112-30-1	C01633	1.13984e+06	871041	1.01739e+06	1.15523e+06	887688	991691	1.11321e+06	1.16801e+06	1.13316e+06	-	C01633	-
Hmmn007137	Pinostilbene; 3,4'-dihydroxy-5-methoxystilbene	Others	Stilbene	C15H14O3	241.09	225.05	242.094	[M-H]-	1	42438-89-1	C20154	1.68393e+07	1.99271e+07	2.06197e+07	1.93176e+07	1.91632e+07	2.00263e+07	7.83231e+06	7.78673e+06	7.92965e+06	-	C20154	-
MWSslk235	Allitol	Others	Saccharides	C6H14O6	181.07	59.01	182.079	[M-H]-	3	488-44-8	-	147980	129225	108233	186320	184202	222691	194902	143443	187393	-	-	-
Lmfn002465	1,2,4-Trihydroxynaphthalene-1,4-di-glucoside (Lawsoniaside)	Others	Others	C22H28O13	499.15	337.09	500.153	[M-H]-	3	116964-02-4	-	90846.9	99603.5	131727	312938	308733	247498	183381	181613	166122	-	-	-
Wbtn007495	5,8-dihydroxy-10-methoxy-2-propylbenzo[h]chromen-4-one	Others	Ketone compounds	C17H16O5	299.09	284.03	300.1	[M-H]-	3	-	-	1.08424e+06	1.06061e+06	1.13834e+06	5.23223e+06	5.42896e+06	5.65921e+06	943621	828227	856057	-	-	-
MWSmce682	L-Xylose	Others	Saccharides	C5H10O5	149.05	59.01	150.053	[M-H]-	1	25990-60-7	C01510	234251	204350	197412	404120	398603	308115	349392	312314	333621	-	C01510	-
pme0500	Melezitose	Others	Saccharides	C18H32O16	503.16	323.1	504.169	[M-H]-	3	597-12-6	C08243	507915	466881	425327	382921	335257	313945	458718	504575	462635	-	C08243	-
mws0011	Syringin	Others	Alcohol compounds	C17H24O9	371.13	209.08	372.142	[M-H]-	2	118-34-3	C01533	9.54959e+06	8.6414e+06	8.88682e+06	2.72045e+06	2.59525e+06	2.76958e+06	1.05709e+07	9.58369e+06	9.84193e+06	ko00940	C01533	-
mws0264	alpha,alpha-Trehalose*	Others	Saccharides	C12H22O11	341.11	119.03	342.116	[M-H]-	1	99-20-7	C01083	866203	923420	851600	615513	592562	583936	705717	575627	606978	ko00500,ko01100,ko01110,ko02010	C01083	-
pme0519	Sucrose*	Others	Saccharides	C12H22O11	341.11	119.03	342.116	[M-H]-	1	57-50-1	C00089	866203	923420	851600	615513	592562	583936	705717	575627	606978	ko00052,ko00500,ko01100,ko01110,ko02010	C00089	-
Zmhn002155	Galloyl-piceid	Others	Stilbene	C27H26O12	541.14	313.07	542.142	[M-H]-	3	-	-	886391	964238	809208	468249	727797	620716	832353	649636	1.03225e+06	-	CM020316	MetMap152
Zmpn000199	D-Galactarate	Others	Saccharides	C6H10O8	209.03	85.03	210.038	[M-H]-	2	526-99-8	C00879	2.22479e+07	2.09503e+07	2.16162e+07	1.97199e+07	1.97865e+07	1.90357e+07	2.48191e+07	2.38194e+07	2.3648e+07	ko00053,ko01100	C00879	-
ML10171848	D-Arabinono-1,4-lactone	Others	Saccharides	C5H8O5	147.03	85.03	148.037	[M-H]-	3	2782-09-4	C00652	1.11949e+06	966612	1.16576e+06	2.50059e+06	2.48102e+06	2.23499e+06	1.87418e+06	1.91368e+06	1.92901e+06	ko00053,ko01100	C00652	-
Lcyn000686	Prunustomentosanan A	Others	Others	C20H22O6	357.13	151.04	358.142	[M-H]-	3	-	-	8.3259e+06	8.73938e+06	9.10139e+06	9.90565e+06	9.96984e+06	9.90392e+06	5.33662e+06	5.38108e+06	5.81602e+06	-	-	-
Lcfn121126	4-Methylene-2-octyl-5-oxotetrahydrofuran-3-carboxylicacid(C75)	Others	Lactones	C14H22O4	253.14	209.16	254.152	[M-H]-	2	218137-86-1	-	3.6907e+06	5.04238e+06	4.57951e+06	1.9742e+07	1.95574e+07	2.13374e+07	1.49558e+06	1.47973e+06	1.31175e+06	-	-	-
Wcsn010375	Methyl (4E,8E,11E)-5,9,13-trimethyltetradeca-4,8,11-trienoate	Others	Others	C18H30O2	277.22	59.01	278.225	[M-H]-	1	-	-	214915	200726	228575	173009	193905	182799	142443	122068	168058	-	-	-
Wcgn008207	Aspidinol	Others	Others	C12H16O4	223.1	179.11	224.105	[M-H]-	3	519-40-4	C10673	402638	508542	460608	632691	609001	607591	562922	567498	532640	-	C10673	-
Waln012743	O-p-Coumaroyl Dihydrofarnesoic acid	Others	Others	C24H32O4	383.22	163.04	384.23	[M-H]-	3	-	-	269159	237455	278416	417834	459791	455161	414295	467220	440505	-	-	-
pme0516	myo-Inositol	Others	Saccharides	C6H12O6	179.06	87.01	180.063	[M-H]-	1	87-89-8	C00137	5.85295e+06	6.09463e+06	6.32785e+06	8.00625e+06	7.81731e+06	7.59312e+06	1.21819e+07	1.13836e+07	1.21152e+07	ko00052,ko00053,ko00562,ko01100,ko01110,ko01250,ko02010,ko04070	C00137	-
pmb3079	N-Acetyl-D-glucosamine 1-phosphate	Others	Saccharides	C8H16NO9P	300.05	96.97	301.056	[M-H]-	3	6866-69-9	C04256	548297	601746	494847	425650	413611	435810	666823	585192	615075	-	C04256	-
Ymjm000152	p-Hydroxypheny-β-D-allopyranoside	Others	Others	C12H16O7	271.08	108.02	272.09	[M-H]-	1	-	-	1.23443e+06	1.25085e+06	1.18957e+06	954126	880553	972442	1.30991e+06	1.24339e+06	1.33644e+06	-	-	-
mws4163	Nystose	Others	Saccharides	C24H42O21	665.21	485.15	666.222	[M-H]-	3	13133-07-8	-	23806.7	24299.5	17857.1	17152.6	20399	10929.1	24853.2	19149.8	19186.9	-	-	-
mws1080	alpha-D-Galactosyl-(1→3)-1D-myo-inositol	Others	Saccharides	C12H22O11	341.11	179.06	342.116	[M-H]-	3	3687-64-7	C01235	2.44864e+06	2.88132e+06	2.60116e+06	1.81382e+06	1.84641e+06	1.84281e+06	2.12111e+06	1.90557e+06	1.98225e+06	ko00052,ko01100	C01235	-
MWSmce165	L-Fucitol	Others	Saccharides	C6H14O5	165.08	59.02	166.084	[M-H]-	2	13074-06-1	-	2.8237e+06	2.93734e+06	3.10928e+06	4.97037e+06	4.64994e+06	4.77345e+06	5.19061e+06	5.05487e+06	5.16242e+06	-	-	-
Wasdn04423	Imperanene glucoside	Others	Others	C25H32O10	491.19	329.14	492.2	[M-H]-	3	-	-	1.76183e+06	1.23779e+06	1.68069e+06	1.04337e+06	1.20497e+06	1.0865e+06	1.06451e+06	930944	1.11181e+06	-	-	-
Yaan006959	Juniperoside	Others	Others	C18H26O9	385.15	223.1	386.158	[M-H]-	3	-	-	9.51992e+06	9.04704e+06	8.8644e+06	5.36567e+06	6.86821e+06	6.00709e+06	1.27543e+07	1.36648e+07	1.13245e+07	-	-	-
Lmqn000432	1-(sn-Glycero-3-phospho)-1D-myo-inositol	Others	Saccharides	C9H19O11P	333.06	333.06	334.067	[M-H]-	2	129830-95-1	C01225	1.28135e+08	1.27068e+08	1.30102e+08	1.73425e+07	1.71254e+07	1.65079e+07	9.54788e+07	9.1307e+07	9.16678e+07	-	C01225	-
Wbtn002952	1-(β-D-Glucopyranosyl)-3-ethyl-4-methyl-1H-pyrrole-2,5-dione	Others	Ketone compounds	C13H19NO7	300.11	138.06	301.116	[M-H]-	1	-	-	2.93893e+06	2.85482e+06	2.97833e+06	3.09246e+06	3.47459e+06	3.50407e+06	1.55013e+06	1.70106e+06	1.686e+06	-	-	-
mws5038	Isomaltulose*	Others	Saccharides	C12H22O11	341.109	89.0249	342.116	[M-H]-	1	13718-94-0	C01742	960391	1.06766e+06	997843	745547	671947	764618	780653	715838	772929	-	C01742	-
Lmsn000381	beta-Maltose*	Others	Saccharides	C12H22O11	341.11	89.02	342.116	[M-H]-	1	69-79-4	C01971	960391	1.06766e+06	997843	745547	671947	764618	780653	715838	772929	-	C01971	-
Wcfn003299	3,3-bis-(4-hydroxy-3-methoxyphenyl)-propane-1,2-diol	Others	Others	C17H20O6	319.12	241.05	320.126	[M-H]-	2	-	-	53528.7	80141.9	68883.2	50668.4	22523	31317.3	48906.8	28424.1	33811.5	-	-	-
pmf0138	D-Mannose*	Others	Saccharides	C6H12O6	179.06	59.01	180.063	[M-H]-	1	3458-28-4	C00159	1.89262e+06	2.10582e+06	2.69136e+06	2.11023e+06	1.75899e+06	2.55737e+06	2.75424e+06	2.91702e+06	3.14264e+06	ko00051,ko00052,ko00520,ko01100,ko01250,ko02010	C00159	-
Zmdn004233	Resveratrol-4'-O-β-D-(6''-O-galloyl)-glucopyranoside	Others	Stilbene	C27H26O12	541.13	313.06	542.142	[M-H]-	3	64898-03-9	-	700861	921117	745866	397581	470772	558298	800808	962654	589614	-	CM020315	MetMap152
Lmmn001294	Koaburaside	Others	Others	C14H20O9	331.1	153.02	332.111	[M-H]-	3	41653-73-0	-	697752	672151	657259	860612	821055	839198	612544	544410	495580	-	-	-
pme3311	D-Fructose 1,6-bisphosphate	Others	Saccharides	C6H14O12P2	338.99	96.97	339.996	[M-H]-	3	488-69-7	C00354	223770	288873	184483	191833	210382	239080	225180	209696	238575	ko00010,ko00030,ko00051,ko00400,ko00710,ko01100,ko01110,ko01200,ko01230	C00354	-
Wcfn005424	2-[2-[(Z)-pent-2-enyl]-3-[3,4,5-trihydroxy-6-(hydroxymethyl)oxan-2-yl]oxycyclopentyl]acetic acid	Others	Others	C18H30O8	373.19	59.02	374.194	[M-H]-	3	-	-	349364	334487	344140	309651	375411	332624	415246	441677	389449	-	-	-
Zapn006835	Pinosylvin	Others	Stilbene	C14H12O2	211.08	169.07	212.084	[M-H]-	1	22139-77-1	C01745	4.70805e+06	5.9607e+06	6.18598e+06	1.89015e+07	1.86904e+07	1.93945e+07	2.16587e+06	2.30711e+06	2.89921e+06	ko00945,ko01110	C01745	-
Safn000636	6-O-D-glycero-α-D-manno-heptopyranosyl-β-D-glucopyranose	Others	Saccharides	C13H24O12	371.12	191.06	372.127	[M-H]-	1	-	-	993828	919038	1.0557e+06	1.77583e+06	2.05932e+06	2.37907e+06	1.12989e+06	1.06716e+06	887549	-	-	-
Wamxn02395	Mycarose glucoside	Others	Aldehyde compounds	C13H24O9	323.14	59.01	324.142	[M-H]-	3	-	-	1.06424e+07	9.96142e+06	1.00337e+07	8.89416e+06	8.75063e+06	9.02543e+06	5.62262e+06	5.78693e+06	5.85035e+06	-	-	-
MA10039641	beta-Lactose*	Others	Saccharides	C12H22O11	341.11	89.02	342.116	[M-H]-	1	63-42-3	C01970	978960	1.11768e+06	1.05236e+06	752846	735313	727665	784363	769691	804589	-	C01970	-
pme2237	Galactitol	Others	Saccharides	C6H14O6	181.07	101.02	182.079	[M-H]-	3	608-66-2	C01697	119614	113918	142394	222122	186961	177335	148033	150555	171097	ko00052,ko01100	C01697	-
Zmxn110201	2,6-Dimethoxy-4-hydroxyphenol-1-O-ß-D-glucopyranoside	Others	Others	C14H20O9	331.1	108.02	332.111	[M-H]-	1	-	-	61768.6	46326.3	45539.2	38357.1	24885.3	41432.5	97041.1	63867.3	28671.5	-	-	-
Wchn003447	4-(3-Hydroxyphenyl)-4-(beta-D-glucopyranosyloxy)butyric acid	Others	Others	C16H22O9	357.12	177.06	358.126	[M-H]-	1	-	-	5.23375e+06	4.50529e+06	4.42862e+06	3.57059e+06	3.17321e+06	5.17546e+06	3.75003e+06	3.22997e+06	3.14588e+06	-	-	-
Safn002774	Chaenorrhinoside	Others	Others	C15H18O9	341.09	179.04	342.095	[M-H]-	3	-	-	118510	169614	146080	180723	177243	188031	148582	158646	135787	-	-	-
mws0906	Coniferin	Others	Alcohol compounds	C16H22O8	341.12	179.07	342.132	[M-H]-	2	531-29-3	C00761	139873	135368	106872	198457	182009	169828	179353	163880	131027	ko00940,ko01110	C00761	-
MWSmce675	Arbutin	Others	Others	C12H16O7	271.08	108.02	272.09	[M-H]-	2	497-76-7	C06186	1.06852e+06	974859	1.05114e+06	889458	795758	807054	1.39104e+06	1.12948e+06	1.17005e+06	ko00010	C06186	-
MWSmce283	4'-Hydroxypropiophenone	Others	Ketone compounds	C9H10O2	149.07	92.03	150.068	[M-H]-	3	70-70-2	C13342	20867.9	34278.7	11372.2	50593	31273.8	52123.9	33432.8	35332.2	39370.1	-	C13342	-
Qahn003953	Erigeside B	Others	Others	C12H22O6	261.13	201.11	262.142	[M-H]-	3	95632-87-4	-	271229	174272	186853	372794	414336	340800	430501	343698	350985	-	-	-
mws1333	Melibiose	Others	Saccharides	C12H22O11	341.11	113.02	342.116	[M-H]-	1	585-99-9	C05402	364414	404959	378338	249622	269465	285465	335902	297317	242717	ko00052,ko01100,ko02010	C05402	-
pme2125	Raffinose*	Others	Saccharides	C18H32O16	503.162	179	504.169	[M-H]-	3	512-69-6	C00492	795147	676904	742146	518390	466686	507971	962840	907311	862533	ko00052,ko01100,ko02010	C00492	-
mws1589	Panose*	Others	Saccharides	C18H32O16	503.16	179.06	504.169	[M-H]-	3	33401-87-5	C00713	795147	676904	742146	518390	466686	507971	962840	907311	862533	-	C00713	-
MWSmce486	D-Gal alpha 1→6D-Gal alpha 1→6D-Glucose	Others	Saccharides	C18H32O16	503.16	383.12	504.169	[M-H]-	3	13382-86-0	C05404	50594.7	56125.9	60672.6	37020.6	52308.8	45644	67619.3	82042.2	73185	ko00052,ko01100	C05404	-
Wcsn000472	Laminaran	Others	Saccharides	C18H32O16	503.16	113.02	504.169	[M-H]-	3	9008-22-4	C00771	659107	663512	674090	528293	437759	428596	801324	740279	731813	-	C00771	-
Wchn005806	7-(4-hydroxy-3-methoxyphenyl)-1-(4-hydroxyphenyl)heptane-2,3,5-triol*	Others	Others	C20H26O6	361.17	165.06	362.173	[M-H]-	3	-	-	1.095e+06	1.27608e+06	1.42919e+06	1.6968e+06	1.38106e+06	1.81242e+06	830152	1.0205e+06	857751	-	-	-
MWS0559	1,6-anhydro-β-D-glucose	Others	Saccharides	C6H10O5	161.05	71.01	162.053	[M-H]-	3	498-07-7	-	472174	566951	491826	426917	385766	385662	677698	590587	534781	-	-	-
mws1089	Sucrose-6-phosphate	Others	Saccharides	C12H23O14P	421.08	241.01	422.082	[M-H]-	3	22372-29-8	C16688	990559	726380	660677	400726	499806	397924	688925	655392	508125	ko00500	C16688	-
Wamxn01040	(X)-1,2-Propanediol 1-O-B-D-Glucopyranoside	Others	Alcohol compounds	C9H18O7	297.12	59.01	238.105	[M+CH3COO]-	1	-	-	3.96583e+06	3.68796e+06	4.2046e+06	5.79496e+06	6.39039e+06	6.28434e+06	4.21786e+06	5.04578e+06	4.97953e+06	-	-	-
Wafn003429	3-Methylbutyl 6-O-(alpha-L-arabinopyranosyl)-beta-D-glucopyranoside	Others	Alcohol compounds	C16H30O10	441.2	249.13	382.184	[M+CH3COOH-H]-	2	-	-	1.6224e+06	1.27425e+06	746363	308156	530307	464372	746528	996565	950423	-	-	-
Lcfn121077	1,3,4,5,6,7,8-heptahydroxyoctan-2-one*	Others	Saccharides	C8H16O8	239.08	59.01	240.084	[M-H]-	1	-	-	8.94842e+06	9.60967e+06	8.3955e+06	6.27258e+06	6.73468e+06	6.65225e+06	1.15173e+07	9.95397e+06	9.69051e+06	-	-	-
Walbn00312	Octose*	Others	Saccharides	C8H16O8	239.08	59.01	240.084	[M-H]-	1	6291-04-9	-	8.94842e+06	9.60967e+06	8.3955e+06	6.27258e+06	6.73468e+06	6.65225e+06	1.15173e+07	9.95397e+06	9.69051e+06	-	-	-
Zmyn000230	2-Dehydro-3-deoxy-L-arabinonate	Others	Saccharides	C5H8O5	147.03	57.03	148.037	[M-H]-	3	-	C00684	1.06431e+06	935588	997123	2.26051e+06	2.08943e+06	2.15555e+06	1.07312e+06	1.1055e+06	1.09321e+06	ko00053,ko01100	C00684	-
mws0889	D-Threonic Acid	Others	Saccharides	C4H8O5	135.03	75.01	136.037	[M-H]-	2	3909-12-4	C21649	1.59836e+06	1.62263e+06	1.70572e+06	2.29959e+06	2.33742e+06	2.2525e+06	2.75934e+06	2.53754e+06	2.49842e+06	-	C21649	-
Lmxn000380	Digalactosylglycerol	Others	Saccharides	C15H28O13	415.15	89.02	416.153	[M-H]-	3	-	-	167172	157266	170626	133531	112674	141631	169954	203941	208502	-	-	-
Wamxn05520	1-Octen-3-Yl Primeveroside	Others	Alcohol compounds	C19H34O10	481.23	289.17	422.215	[M+CH3COO]-	3	-	-	305872	840226	387020	505964	1.15563e+06	559478	37136.2	13505.7	34444.9	-	-	-
Wamxn00509	Perseitol-1-O-xyloside	Others	Saccharides	C12H24O11	343.13	149.05	344.132	[M-H]-	3	-	-	273280	321249	256161	280559	230478	263484	253600	271165	295252	-	-	-
Zmyn000108	D-Glucarate	Others	Saccharides	C6H10O8	209.03	85.03	210.038	[M-H]-	2	87-73-0	C00818	2.21941e+07	2.13129e+07	2.16574e+07	2.02955e+07	2.04605e+07	1.92809e+07	2.41225e+07	2.4245e+07	2.35696e+07	ko00053,ko01100	C00818	-
pma6625	E-3,4,5'-Trihydroxy-3'-glucosylstilbene	Others	Stilbene	C20H22O9	405.12	243.06	406.126	[M-H]-	3	-	-	6.17729e+06	6.04304e+06	5.70547e+06	4.05015e+06	3.69234e+06	4.26685e+06	4.07883e+06	4.76687e+06	4.99043e+06	-	-	-
Waptn03329	Benzyl 6-O-beta-D-apiofuranosyl-beta-D-glucoside*	Others	Alcohol compounds	C18H26O10	461.17	269.1	402.153	[M+CH3COO]-	3	115009-57-9	-	47266.2	140181	57561.9	56156.7	88014.1	57555.3	137087	192345	227475	-	-	-
Lcsn000560	2,5-Furandicarboxylic acid	Others	Others	C6H4O5	155	67.02	156.006	[M-H]-	2	3238-40-2	C20450	533790	392867	506382	975886	862557	898785	468470	458296	434144	-	C20450	-
mws1521	Salicin	Others	Others	C13H18O7	285.1	121.03	286.105	[M-H]-	3	138-52-3	C01451	67976.8	57647.3	64226	51462.5	54523.4	49267	72445.1	62732.2	74834.2	ko00010	C01451	-
Hmcn000192	Sedoheptulose	Others	Saccharides	C7H14O7	209.07	59.01	210.074	[M-H]-	1	3019-74-7	C02076	1.05163e+07	9.91531e+06	1.05464e+07	8.86199e+06	9.15764e+06	8.73535e+06	1.1364e+07	1.10572e+07	1.06389e+07	ko00030,ko01100	C02076	-
pme3705	D-Glucuronate*	Others	Saccharides	C6H10O7	193.04	72.99	194.043	[M-H]-	1	528-16-5	C00191	4.98066e+06	4.97434e+06	4.96522e+06	1.25722e+07	1.22947e+07	1.20708e+07	2.31815e+07	2.17229e+07	2.25588e+07	ko00040,ko00053,ko00520,ko00562,ko01100,ko01240,ko01250	C00191	-
mws1189	D-Galacturonate*	Others	Saccharides	C6H10O7	193.04	72.99	194.043	[M-H]-	1	685-73-4	C00333	4.98066e+06	4.97434e+06	4.96522e+06	1.25722e+07	1.22947e+07	1.20708e+07	2.31815e+07	2.17229e+07	2.25588e+07	ko00040,ko00053,ko00520,ko01100,ko01240,ko01250,ko02010	C00333	-
Zmhn000892	4-O-Glucosyl-3,4-dihydroxybenzyl alcohol	Others	Others	C13H18O8	301.09	139.05	302.1	[M-H]-	2	-	-	1.33812e+06	1.39042e+06	1.34929e+06	1.62421e+06	1.62836e+06	1.73035e+06	1.77778e+06	1.76793e+06	1.87432e+06	-	-	-
Wcdn004141	2-[3-[4-[1,3-dihydroxy-1-(4-hydroxy-3-methoxyphenyl)propan-2-yl]oxy-3-methoxyphenyl]propoxy]-6-(hydroxymethyl)oxane-3,4,5-triol	Others	Others	C26H36O12	539.21	491.19	540.221	[M-H]-	3	-	-	4.18468e+06	4.25876e+06	4.23452e+06	2.4992e+06	2.24391e+06	2.57999e+06	1.58121e+06	1.74597e+06	1.5489e+06	-	-	-
Waptn03150	Benzyl alcohol xylopyranosyl-(1-6)-glucopyranoside*	Others	Alcohol compounds	C18H26O10	461.16	269.1	402.153	[M+CH3COO]-	3	-	-	44463.9	68265.1	67670.9	28053.9	39201.2	30117.7	187105	200185	92185.7	-	-	-
Zbln000478	2-(4-hydroxy-1-((3,4,5-trihydroxy-6-(hydroxymethyl)tetrahydro-2H-pyran-2-yl)oxy)cyclohexyl)acetic acid	Others	Saccharides	C14H24O9	335.13	155.07	336.143	[M-H]-	2	-	-	4.46164e+06	3.86569e+06	4.11472e+06	1.37921e+06	1.50049e+06	1.65226e+06	2.62856e+06	2.43938e+06	2.49923e+06	-	-	-
mws0021	Resveratrol	Others	Stilbene	C14H12O3	227.07	185.06	228.079	[M-H]-	3	501-36-0	C03582	216565	293674	273095	597914	567761	553970	96983.7	98358.6	114951	ko00945,ko01110	C03582	MetMap152
MWSHC20168	Methyl cumalate	Others	Lactones	C7H6O4	153.02	109.03	154.027	[M-H]-	3	6018-41-3	-	802011	1.09719e+06	429039	1.15498e+06	1.26943e+06	1.54229e+06	1.03933e+06	1.20718e+06	1.75117e+06	-	-	-
Jmwn002172	3,4-dihydroxyphenylethanol-β-D-glucopyranoside	Others	Alcohol compounds	C14H20O8	315.11	135.04	316.116	[M-H]-	3	-	-	355271	379496	327391	239706	156089	227883	351664	313249	343663	-	-	-
Lcfn121184	a-L-threo-4-Hex-4-enopyranuronosyl-D-galacturonicacid	Others	Saccharides	C12H16O12	351.06	175.03	352.064	[M-H]-	3	-	-	267224	283372	281092	148977	168371	169007	366949	331031	325746	-	-	-
mws1090	D-Glucose-1-phosphate*	Others	Saccharides	C6H13O9P	259.02	96.97	260.03	[M-H]-	1	59-56-3	C00103	7.83129e+07	7.73771e+07	7.67863e+07	2.71677e+07	2.42829e+07	2.41462e+07	6.87787e+07	6.2117e+07	6.08079e+07	ko00010,ko00040,ko00052,ko00500,ko00520,ko00523,ko00561,ko01100,ko01110,ko01240,ko01250	C00103	-
MWS2442	D-Fructose 6-Phosphate*	Others	Saccharides	C6H13O9P	259.02	96.97	260.03	[M-H]-	1	643-13-0	C00085	7.83129e+07	7.73771e+07	7.67863e+07	2.71677e+07	2.42829e+07	2.41462e+07	6.87787e+07	6.2117e+07	6.08079e+07	ko00010,ko00030,ko00051,ko00052,ko00500,ko00520,ko00710,ko01100,ko01110,ko01200,ko01230,ko01240,ko01250	C00085	-
Zbkn000353	myo-Inositol 5-phosphate*	Others	Saccharides	C6H13O9P	259.02	96.97	260.03	[M-H]-	1	-	C06155	7.83129e+07	7.73771e+07	7.67863e+07	2.71677e+07	2.42829e+07	2.41462e+07	6.87787e+07	6.2117e+07	6.08079e+07	-	C06155	-
mws0866	D-Glucose 6-phosphate*	Others	Saccharides	C6H13O9P	259.022	97	260.03	[M-H]-	1	56-73-5	C00092	7.83129e+07	7.73771e+07	7.67863e+07	2.71677e+07	2.42829e+07	2.41462e+07	6.87787e+07	6.2117e+07	6.08079e+07	ko00500,ko00524,ko00562,ko01100,ko01110	C00092	-
Yaan000442	(3S,4S,5R)-2-(((2R,3S,4S,5R,6R)-6-(((2S,3S,4S,5R)-3,4-dihydroxy-2,5-bis(hydroxymethyl)tetrahydrofuran-2-yl)oxy)-3,4,5-trihydroxytetrahydro-2H-pyran-2-yl)methoxy)-3,4,5-trihydroxycyclohexane-1-carboxylic acid	Others	Others	C19H32O16	515.16	341.11	516.169	[M-H]-	3	-	-	1.36832e+06	1.1423e+06	842402	1.469e+06	739237	1.54557e+06	297790	375671	217008	-	-	-
Safn000570	9-hydroxy-8-{[(2S,3R,4S,5S,6R)-3,4,5-trihydroxy-6-(hydroxymethyl)oxan-2-yl]oxy}-1H,3H-naphtho[2,3-c]furan-1-one	Others	Others	C18H18O9	377.09	341.11	378.095	[M-H]-	3	-	-	1.4753e+07	1.3159e+07	1.39288e+07	1.39495e+07	1.30267e+07	1.44597e+07	7.80823e+06	8.0672e+06	8.22929e+06	-	-	-
Safn004271	butyl 3-{[3,4,5-trihydroxy-6-(hydroxymethyl)oxan-2-yl]oxy}butanoate	Others	Others	C14H26O8	321.16	159.11	322.163	[M-H]-	2	-	-	524921	489740	437265	491839	552194	600985	190129	249220	205746	-	-	-
Wasyqn4894	1-Hexanol Rhamnosylglucoside	Others	Alcohol compounds	C18H34O10	469.23	263.15	410.215	[M+CH3COO]-	1	-	-	361532	517901	152560	252444	153112	153063	206127	307828	282551	-	-	-
Wcfn005812	Flaxseeds Extract*	Others	Others	C20H26O6	361.16	165.06	362.173	[M-H]-	3	3688-23-1	-	1.07557e+06	1.27224e+06	946898	1.3986e+06	1.638e+06	1.48412e+06	767041	806765	763236	-	-	-
Zbln006394	shancigusin F	Others	Stilbene	C21H26O8	405.16	243.11	406.163	[M-H]-	3	-	-	6.63392e+06	6.82528e+06	7.90669e+06	6.43755e+06	6.91742e+06	7.23667e+06	5.42788e+06	6.06168e+06	5.61037e+06	-	CM020310	MetMap152
Lmqn000351	Rutinose	Others	Saccharides	C12H22O10	325.11	59.01	326.121	[M-H]-	3	90-74-4	C08247	383101	356330	429769	388454	455918	383981	479997	464858	477928	-	C08247	-
Wasn000410	sn-glycero-3-phospho-(1'-sn-glycerol)	Others	Others	C6H15O8P	245.04	153	246.05	[M-H]-	3	-	-	8.30074e+07	8.04628e+07	7.26126e+07	2.19709e+07	2.04832e+07	2.29606e+07	5.87039e+07	6.30728e+07	6.03295e+07	-	-	-
mws1350	Syringaldehyde; 4-Hydroxy-3,5-Dimethoxybenzaldehyde	Others	Aldehyde compounds	C9H10O4	181.05	151	182.058	[M-H]-	3	134-96-3	-	35283	107058	89092.5	51445.9	52168.7	43659.4	64895.7	45879.3	78266.7	-	-	-
mws0853	Sinapyl alcohol	Others	Alcohol compounds	C11H14O4	209.08	179.07	210.089	[M-H]-	3	537-33-7	C02325	2.42979e+06	1.92753e+06	2.139e+06	1.90021e+06	1.57451e+06	1.6075e+06	1.41851e+06	1.82598e+06	1.81167e+06	ko00940,ko01100,ko01110	C02325	-
Sasn004908	Oregonin	Others	Others	C24H30O10	477.18	327.13	478.184	[M-H]-	3	55303-93-0	-	4.86499e+06	4.89133e+06	3.80882e+06	2.31306e+06	3.24827e+06	3.38744e+06	6.79619e+06	6.61169e+06	6.61189e+06	-	-	-
Wdzn000513	methyl alpha-D-fructofuranoside*	Others	Saccharides	C7H14O6	193.07	59.01	194.079	[M-H]-	2	-	-	7.1249e+06	7.38322e+06	7.2146e+06	4.19092e+07	4.00061e+07	4.0004e+07	7.52219e+07	7.51431e+07	7.49433e+07	-	-	-
mws2104	D-Pinitol*	Others	Saccharides	C7H14O6	193.07	59.01	194.079	[M-H]-	2	10284-63-6	C03844	7.1249e+06	7.38322e+06	7.2146e+06	4.19092e+07	4.00061e+07	4.0004e+07	7.52219e+07	7.51431e+07	7.49433e+07	-	C03844	-
MWSmce203	D-Cellobiose	Others	Saccharides	C12H22O11	341.12	73.03	342.116	[M-H]-	1	528-50-7	-	1.85392e+06	1.85505e+06	1.92355e+06	1.5175e+06	1.4237e+06	1.40468e+06	1.53678e+06	1.58165e+06	1.53731e+06	-	-	-
Sasn000615	lactobionic acid	Others	Saccharides	C12H22O12	357.1	75.01	358.111	[M-H]-	1	96-82-2	-	1.77572e+07	1.43466e+07	1.51585e+07	5.7571e+06	4.9224e+06	5.70363e+06	1.72477e+07	1.57132e+07	1.58041e+07	-	-	-
mws0344	D-Xylonate*	Others	Saccharides	C5H10O6	165.04	75.01	166.048	[M-H]-	1	526-91-0	C00502	2.08081e+07	2.1493e+07	2.25825e+07	4.12806e+07	3.92592e+07	3.88458e+07	3.87604e+07	3.80029e+07	3.88381e+07	ko00040,ko01100	C00502	-
Wasyqn0366	D-Arabinonate*	Others	Saccharides	C5H10O6	165.04	75.01	166.048	[M-H]-	1	32609-14-6	C00878	1.10454e+07	1.1134e+07	1.0964e+07	2.10206e+07	2.02966e+07	1.97797e+07	1.98757e+07	1.92329e+07	1.95936e+07	ko00053,ko01100	C00878	-
MWSmce148	(-)-Quebrachitol	Others	Saccharides	C7H14O6	193.08	161.05	194.079	[M-H]-	3	642-38-6	C08257	87909.8	92566	87965.8	119116	96764.3	78486.1	122120	109117	123615	-	C08257	-
pme0513	Xylitol*	Others	Saccharides	C5H12O5	151.06	59	152.069	[M-H]-	3	87-99-0	C00379	33145	27937.1	48506.3	67309.5	40326.8	52427.4	128020	118713	119266	ko00040,ko01100,ko02010	C00379	-
mws0438	L-Arabitol*	Others	Saccharides	C5H12O5	151.06	59.01	152.069	[M-H]-	3	488-82-4	C00532	33145	27937.1	48506.3	67309.5	40326.8	52427.4	128020	118713	119266	ko00040,ko01100	C00532	-
Jmwn004371	4-Hydroxyphenethoxy-8-O-β-D-[6-O-(4-O-β-D-glucopyranosyl)-sinapoyl]glucopyranoside	Others	Alcohol compounds	C31H40O16	667.22	505.17	668.232	[M-H]-	3	-	-	262937	242618	218372	169547	195956	214171	190867	245163	237669	-	-	-
mws2523	alpha,alpha'-Trehalose 6-phosphate	Others	Saccharides	C12H23O14P	421.08	241.01	422.082	[M-H]-	3	4484-88-2	C00689	9.21096e+06	9.44729e+06	8.7232e+06	3.28908e+06	3.19028e+06	2.73069e+06	5.39181e+06	4.7276e+06	5.89918e+06	ko00500,ko01100,ko01110	C00689	-
MWS1983	Maltitol	Others	Saccharides	C12H24O11	343.12	89.03	344.132	[M-H]-	3	585-88-6	-	5.04783e+06	4.65207e+06	4.61151e+06	3.92688e+06	4.62836e+06	3.90814e+06	5.66959e+06	5.48191e+06	5.06736e+06	-	-	-
Wamxn00739	Methyl Alpha-D-Galactopyranoside	Others	Alcohol compounds	C7H14O6	253.09	59.01	194.079	[M+CH3COO]-	2	-	-	4.35007e+06	4.12043e+06	5.63968e+06	1.0784e+07	1.16025e+07	1.21789e+07	2.55875e+07	2.61236e+07	2.31534e+07	-	-	-
Cmjn004337	Benzyl-(2''-O-xylosyl)glucoside	Others	Others	C18H26O10	401.14	269.1	402.153	[M-H]-	3	-	-	168547	138316	175082	126118	153515	145710	92667.1	68665.3	71151.2	-	-	-
Labn003679	(E)-caffeyl alcohol 4-O-β-D-glucopyranoside	Others	Alcohol compounds	C15H20O8	327.11	147.05	328.116	[M-H]-	1	-	-	6.2964e+06	5.20268e+06	5.44637e+06	4.15837e+06	4.95491e+06	4.80616e+06	5.13723e+06	4.80265e+06	4.75703e+06	-	-	-
Zmyn000110	alpha-D-Glucosamine 1-phosphate	Others	Saccharides	C6H14NO8P	258.04	78.96	259.046	[M-H]-	3	2152-75-2	C06156	1.48257e+06	1.39482e+06	1.3915e+06	220668	191362	183028	924457	901344	922118	ko00520,ko01100,ko01250	C06156	-
Ypgn004474	Resveratroloside*	Others	Stilbene	C20H22O8	389.12	227.07	390.132	[M-H]-	3	38963-95-0	-	1.66041e+06	1.61756e+06	1.49584e+06	3.5059e+06	3.29498e+06	3.61676e+06	1.51958e+06	1.59693e+06	1.48904e+06	-	CM020304	MetMap152
Zmhn001970	Piceid (3,4',5-Trihydroxystilbene-3-O-glucoside)*	Others	Stilbene	C20H22O8	389.12	227.08	390.132	[M-H]-	3	27208-80-6	C10275	1.60952e+06	1.74334e+06	1.37149e+06	2.98138e+06	2.98837e+06	3.51966e+06	1.45504e+06	1.46655e+06	1.47555e+06	-	C10275	MetMap152
Wcfn003424	Coumaroyl Quinic Acid	Others	Others	C16H18O8	337.09	191.06	338.1	[M-H]-	3	-	-	1.88409e+07	1.80368e+07	1.50348e+07	1.38881e+06	1.26668e+06	1.26215e+06	8.58349e+06	6.56326e+06	6.99508e+06	-	-	-
Wasn000528	2-O-α-D-Glucopyranosyl-L-ascorbic acid	Others	Vitamin	C12H18O11	337.08	277.06	338.085	[M-H]-	1	129499-78-1	C18339	115546	121191	78795	166923	189911	176895	92554.2	100519	80918.6	-	C18339	-
mws4193	Homovanillic alcohol	Others	Alcohol compounds	C9H12O3	167.07	121.03	168.079	[M-H]-	3	2380-78-1	-	282739	96130.9	250333	280164	344376	376747	212045	184629	305428	-	-	-
pmn001690	3-Hydroxy-4-isopropylbenzylalcohol-3-O-glucoside	Others	Alcohol compounds	C16H24O7	327.14	165.09	328.152	[M-H]-	2	-	-	116265	82067.5	123438	156160	157704	163344	115820	120636	109062	-	-	-
Lmln001856	5,7-Dihydroxy-4-oxo-2-(3,4,5-trihydroxyphenyl)-4H-chromen-3-yl-alloside	Others	Others	C21H20O13	479.09	316.02	480.09	[M-H]-	2	-	-	2.5157e+06	2.14564e+06	2.19106e+06	1.74323e+06	1.9179e+06	1.85452e+06	1.16573e+06	1.14507e+06	1.08522e+06	-	-	-
Rfn064534	6-O-sinapoyl-D-glucono-1,5-lactone	Others	Others	C17H20O10	383.1	205.05	384.106	[M-H]-	2	-	-	46823.2	31311.2	54952	76585.3	57841.4	70970.4	30485.6	30065.6	37122.1	-	-	-
Zmpn001713	3-Nitrophenol	Others	Others	C6H5NO3	138.02	108.02	139.027	[M-H]-	3	554-84-7	C14418	30000.4	43941.3	38254.3	32951.4	32892	41515	38731.6	17656.3	35696.2	-	C14418	-
pme2435	L-Fucose	Others	Saccharides	C6H12O5	163.06	59.01	164.069	[M-H]-	3	-	C01019	200021	188636	187718	434603	408646	311193	816031	730840	862732	ko00051,ko00520,ko01100,ko01250	C01019	-
Zmsn002929	7R-O-morroniside	Others	Others	C17H26O11	405.14	155.03	406.147	[M-H]-	2	-	-	121714	249102	125190	204546	160841	377801	35214.4	69795.3	54540.8	-	-	-
mws0628	4-Hydroxybenzaldehyde	Others	Aldehyde compounds	C7H6O2	121.03	92.03	122.037	[M-H]-	3	123-08-0	C00633	2.19179e+06	2.0065e+06	2.11849e+06	3.14819e+06	3.21282e+06	3.42237e+06	3.11933e+06	3.30159e+06	2.8085e+06	ko01100	C00633	-
WaYn002948	Pyrocatechol monoglucoside	Others	Others	C12H16O7	271.08	109.03	272.09	[M-H]-	3	2400-71-7	-	144186	138498	144001	227709	279263	171075	69464.8	50209.5	51265.2	-	-	-
Wacyn03531	2-[4-(3-Hydroxypropyl)-2-methoxyphenoxy]-1,3-propanediol 1-glucoside	Others	Alcohol compounds	C19H30O10	477.2	181.09	418.184	[M+CH3COO]-	2	-	-	2.31773e+06	768275	2.04889e+06	923307	1.32781e+06	562558	768499	652670	495497	-	-	-
Safn003374	Taxuside	Others	Others	C16H24O8	343.14	181.09	344.147	[M-H]-	3	-	-	3.39489e+06	3.11155e+06	2.51947e+06	5.48654e+06	5.55152e+06	5.34574e+06	2.47295e+06	2.40024e+06	2.08047e+06	-	-	-
Wcdn003896	(6R,9S)-3-oxo-α-ionol apiofuranosylglucopy-ranoside	Others	Others	C19H30O8	385.18	153.09	386.194	[M-H]-	3	-	-	1.836e+06	1.86444e+06	1.10516e+06	1.85195e+06	1.22671e+06	1.5192e+06	1.49016e+06	878134	2.12395e+06	-	-	-
mws4175	D-Glucuronolactone	Others	Saccharides	C6H8O6	175.02	85.03	176.032	[M-H]-	2	32449-92-6	C02670	825788	985227	937100	827783	877696	820867	1.14588e+06	1.24713e+06	1.38204e+06	ko00053,ko01100	C02670	-
Lazn002744	C-Veratroylglycol	Others	Alcohol compounds	C10H12O5	211.06	148.02	212.069	[M-H]-	3	168293-10-5	-	413143	388881	424463	360412	388792	390079	706323	727455	715742	-	-	-
mws1024	4-Hydroxycinnamyl aldehyde	Others	Aldehyde compounds	C9H8O2	147.05	129.03	148.052	[M-H]-	3	2538-87-6	C05608	31495.7	41840	22971.8	75301.2	92465.9	73879.8	73383.7	55690.1	82292.3	ko00940,ko01100,ko01110	C05608	-
pmn001511	3-Hydroxy-5-Methylphenol-1-O-Glucoside	Others	Others	C13H18O7	285.1	123.05	286.105	[M-H]-	3	-	-	107399	103341	102982	123510	144287	166965	167088	155823	161666	-	-	-
pmb2653	DMelezitose O-rhamnoside	Others	Saccharides	C24H42O20	649.22	145.05	650.227	[M-H]-	3	-	-	295684	306726	394943	76472.9	163504	197728	171804	112383	109609	-	-	-
Zmpn000095	Sorbitol 6-phosphate	Others	Saccharides	C6H15O9P	261.04	78.96	262.045	[M-H]-	3	20479-58-7	C01096	684919	690235	635433	231999	255712	220725	535528	558697	604295	ko00051,ko01100	C01096	-
mws0093	Coniferyl alcohol	Others	Alcohol compounds	C10H12O3	179.07	146.04	180.079	[M-H]-	3	458-35-5	C00590	132431	41888	57315.9	29412.2	54196.3	23172.9	114872	47274.5	67294.1	ko00940,ko00999,ko01100,ko01110	C00590	-
pme2165	Orotate	Others	Vitamin	C5H4N2O4	155.01	111.02	156.017	[M-H]-	3	65-86-1	C00295	4.36844e+06	4.0754e+06	4.22226e+06	5.74138e+06	5.51409e+06	5.48019e+06	2.33772e+06	2.4646e+06	2.4854e+06	ko00240,ko01100,ko01240	C00295	-
WaYn002408	[(1R,2R)-cyclohexane-1,2-diol]Beta-D-Galactopyranoside	Others	Others	C12H22O7	337.15	161.05	278.137	[M+CH3COOH-H]-	1	-	-	88095.5	87274.2	78891.5	119628	155758	228375	46636.5	43139.3	43916.7	-	-	-
pmb3081	Glucaric acid-1-Phosphate	Others	Saccharides	C6H11PO11	289	96.97	290.004	[M-H]-	3	-	-	5.40256e+06	6.09497e+06	5.22437e+06	1.49463e+06	1.23999e+06	1.50489e+06	3.6547e+06	3.31416e+06	3.74997e+06	-	-	-
pme3163	D-Sedoheptuiose 7-phosphate	Others	Saccharides	C7H15O10P	289.03	96.97	290.04	[M-H]-	3	2646-35-7	C05382	5.40256e+06	6.09497e+06	5.22437e+06	1.49463e+06	1.23999e+06	1.50489e+06	3.6547e+06	3.31416e+06	3.74997e+06	ko00030,ko00710,ko01100,ko01110,ko01200,ko01230,ko01250	C05382	-
Safn000900	2,3,5-trihydroxy-4-(phosphonooxy)hexanedioic acid	Others	Others	C6H11O11P	289.01	96.97	290.004	[M-H]-	2	-	-	5.40256e+06	6.09497e+06	5.22437e+06	1.49463e+06	1.23999e+06	1.50489e+06	3.6547e+06	3.31416e+06	3.74997e+06	-	-	-
Wasn000737	6-Galloyl Ascorbic acid	Others	Vitamin	C13H12O10	327.04	175.02	328.043	[M-H]-	3	-	-	55870.2	48762.4	52638.2	54333.5	37128.9	51661.2	62644	47302.1	37237.6	-	-	-
pme2529	1,5-Anhydro-D-glucitol	Others	Saccharides	C6H12O5	163.06	101.02	164.069	[M-H]-	3	154-58-5	C07326	635558	595562	635110	1.02944e+06	1.06123e+06	1.01846e+06	1.43326e+06	1.50204e+06	1.36775e+06	-	C07326	-
Lcyn000684	Prustomentoside B	Others	Others	C21H30O13	489.16	165.06	490.169	[M-H]-	3	-	-	123765	114336	90419.3	95006.3	74129.9	68523.3	68102.1	70669	82339.2	-	-	-
Ymjm000116	6-O-Acetylarbutin*	Others	Others	C14H18O8	313.09	151.04	314.1	[M-H]-	2	10338-88-2	-	240716	313834	227853	221918	241527	256377	91964.4	536057	576719	-	-	-
MWSmce220	D-Glucono-1,5-lactone*	Others	Saccharides	C6H10O6	177.04	59.01	178.048	[M-H]-	2	90-80-2	C00198	336450	173641	429417	168042	469211	210685	553276	527950	656241	ko00030,ko01100,ko01110,ko01200	C00198	-
pme2253	L-Gulono-1,4-Lactone*	Others	Saccharides	C6H10O6	177.04	59.01	178.048	[M-H]-	2	1128-23-0	C01040	336450	173641	429417	168042	469211	210685	553276	527950	656241	ko00053,ko01100,ko01240	C01040	-
Safn004633	Ilicifolinoside B	Others	Others	C19H32O8	447.23	387.2	388.21	[M+CH3COOH-H]-	3	-	-	83264	66394.7	66413.8	309742	54555.9	30255.4	128447	77420	79493.8	-	-	-
Hmsn002598	Salirepin	Others	Others	C13H18O8	301.09	139.04	302.1	[M-H]-	3	26652-12-0	-	259313	225795	253705	275904	301584	331859	161508	141430	182916	-	-	-
Wahln04020	Benzyl Alcohol Beta-D-Rutinoside	Others	Alcohol compounds	C19H28O10	475.18	269.1	416.168	[M+CH3COO]-	3	-	-	53134.7	58325.9	54021.4	73991.9	46485.4	17461.6	119824	144872	70868.8	-	-	-
Lmtn002324	Benzyl-(2''-O-glucosyl)glucoside	Others	Others	C19H28O11	431.15	269.1	432.163	[M-H]-	3	76819-28-8	C17564	67009.3	67429.1	60391.3	130095	117632	130778	132198	132785	138542	-	C17564	-
Hmln003529	Benzyl β-primeveroside	Others	Others	C18H26O10	401.15	269.11	402.153	[M-H]-	3	130622-31-0	-	11348.4	35968.5	30614.4	163415	24244.9	32770.7	83374.6	32629.8	60086.5	-	-	-
Wafn005121	1-Octen-3-Ol-3-O-Beta-D-Xylopyranosyl(1→6)-Beta-D-Glucopyranoside	Others	Alcohol compounds	C19H34O10	421.21	289.16	422.215	[M-H]-	3	-	C17614	288730	223004	245345	497828	473874	455586	23727.8	34179.2	60386.5	-	C17614	-
Sakn002857	3,4-Dihydroxyphenethyl alcohol-8-O-[β-D-apinosyl(1→3)]-β-D-glucoside	Others	Alcohol compounds	C19H28O12	447.15	315.11	448.158	[M-H]-	2	-	-	20507	30814.2	24721.6	17836.1	11654.2	14283.2	13935	15599	10962.3	-	-	-
Sasn001174	Hymenoside M	Others	Others	C11H20O8	339.13	117.06	280.116	[M+CH3COOH-H]-	3	-	-	314780	3247.02	111899	303081	387614	162468	251112	313027	211688	-	-	-
mws0458	4-Hydroxy-3-methoxy-benzaldehyde	Others	Aldehyde compounds	C8H8O3	151.04	136.02	152.047	[M-H]-	3	121-33-5	C00755	669188	1.03166e+06	629294	1.50324e+06	1.43151e+06	1.39446e+06	1.60162e+06	1.61434e+06	1.80597e+06	ko00996,ko01100,ko01110	C00755	-
Wafn004288	7-Hydroxy-3,7-Dimethyl-2-Octenyl 6-O-Alpha-L-Arabinofuranosyl-Beta-D-Glucopyranoside	Others	Others	C21H38O11	525.25	333.19	466.241	[M+CH3COOH-H]-	2	-	-	104169	57917.7	30798.8	44526.5	133116	136522	16138.2	16024.9	14765.9	-	-	-
mws1359	Pterostilbene	Others	Stilbene	C16H16O3	255.1	197.06	256.11	[M-H]-	3	537-42-8	C10287	177002	169111	191185	174139	178398	174630	612845	598762	682762	ko00945,ko01110	C10287	MetMap152
MA10039492	Dehydroascorbate	Others	Vitamin	C6H6O6	173.01	71.03	174.016	[M-H]-	2	490-83-5	C05422	8.18353e+06	8.07062e+06	8.0623e+06	9.11097e+06	9.1459e+06	8.83397e+06	3.71823e+06	3.84758e+06	3.55126e+06	ko00053,ko00480,ko01100	C05422	-
mws2368	4-Hydroxyphenylethanol	Others	Alcohol compounds	C8H10O2	137.06	119.05	138.068	[M-H]-	3	501-94-0	C06044	31410.1	25784.6	28204.8	75118.6	66579.3	34316	42040	51362	62169	ko00350,ko01100	C06044	-
Wchn004836	2,4,8-Trihydroxy-1-tetralone	Others	Others	C10H10O4	193.05	175.04	194.058	[M-H]-	3	88899-02-9	C09974	38210.6	16520	21543.4	12815.6	12800.3	23485.3	32209.5	17445.9	16408.2	-	C09974	-
Hmhn000927	Phloroglucinol-1-O-β-D-glucopyranoside	Others	Others	C12H16O8	287.08	125.02	288.084	[M-H]-	1	-	-	187700	204943	146027	428527	473710	385653	567386	577078	554064	-	-	-
Lmmn000214	Solatriose	Others	Saccharides	C18H32O15	487.17	341.11	488.174	[M-H]-	3	528-40-5	-	1.05105e+06	1.67222e+06	515592	944446	2.03495e+06	2.73853e+06	1.18775e+06	1.39843e+06	744284	-	-	-
pma6455	D-Ribulose 5-phosphate	Others	Saccharides	C5H11O8P	229.01	96.97	230.019	[M-H]-	3	4151-19-3	C00199	521933	461301	486433	283840	378101	370416	525458	575289	491355	ko00030,ko00040,ko00710,ko00740,ko01100,ko01110,ko01200,ko01230,ko01240,ko01250	C00199	-
Wahln02843	2,6-Dimethoxy-4-(2-Hydroxyethyl)Phenyl Beta-D-Glucopyranoside	Others	Alcohol compounds	C16H24O9	419.16	197.08	360.142	[M+CH3COO]-	3	-	-	2985.29	2985.29	2985.29	82115	50747.3	64573.9	91702.6	72890	70203.8	-	-	-
Lmmn006306	Machilusolide D	Others	Lactones	C18H30O3	293.21	293.21	294.219	[M-H]-	3	-	-	655719	680200	884184	58508.6	58508.6	58508.6	314670	328422	292543	-	-	-
Jmbn003202	Butyl Beta-D-Fructopyranoside	Others	Saccharides	C10H20O6	235.12	59.01	236.126	[M-H]-	3	67884-27-9	-	54020.8	25147.5	62184.2	23948.7	29528	49736.2	40560.3	56748.3	38551.4	-	-	-
MWSmce264	Hydroxytyrosol	Others	Alcohol compounds	C8H10O3	153.06	123.05	154.063	[M-H]-	3	10597-60-1	-	71048.7	41327.3	61672.5	36273.2	64002.3	18411.4	59173	34947.6	51736.3	-	-	-
mws1593	Maltotetraose	Others	Saccharides	C24H42O21	665.21	161.04	666.222	[M-H]-	3	34612-38-9	C02052	21154.3	17375.1	16013.3	10783.7	16483	10402.4	21288.4	18350.4	18678.7	-	C02052	-
Zmzn000078	Glycerone phosphate	Others	Ketone compounds	C3H7O6P	168.99	78.96	169.998	[M-H]-	3	57-04-5	C00111	769687	657828	656491	299004	301460	479082	921027	786899	802225	ko00010,ko00040,ko00051,ko00052,ko00561,ko00562,ko00564,ko00630,ko00640,ko00710,ko00760,ko01100,ko01110,ko01200,ko01230	C00111	-
Lmtn003441	2-Acetyl-3-hydroxyphenyl-1-O-glucoside	Others	Others	C15H20O7	311.11	149.06	312.121	[M-H]-	3	-	-	27518.9	27518.9	27518.9	27518.9	27518.9	27518.9	194156	199369	210474	-	-	-
Jmwn002057	2-(3-β-D-glucopyranosyloxy-4-hydroxyphenyl)ethanol-1-O-β-D-glucopyranoside	Others	Alcohol compounds	C20H30O13	477.16	315.11	478.169	[M-H]-	2	-	-	1829.61	1829.61	1829.61	1829.61	1829.61	1829.61	260563	198089	9148.07	-	-	-
Hmfn000531	Ascorbate	Others	Vitamin	C6H8O6	175.02	87.01	176.032	[M-H]-	1	50-81-7	C00072	9.27234e+06	1.12441e+07	1.12561e+07	1.28119e+07	1.159e+07	1.112e+07	2.05549e+07	2.78466e+07	2.66163e+07	ko00053,ko00480,ko01100,ko01110,ko01240	C00072	-
Sazp001763	4-Hydroxyphenyl 6-O-(2-Methyl-3-Hydroxypropionyl)-Beta-D-Galactopyranoside	Others	Others	C16H22O9	357.12	195.07	358.126	[M-H]-	1	-	-	958567	1.00652e+06	1.04285e+06	6704.83	1.48961e+06	1.48632e+06	1.0604e+06	1.0535e+06	908908	-	-	-
Lmsn000954	Dambonitol	Others	Saccharides	C8H16O6	207.09	59.01	208.095	[M-H]-	1	523-94-4	-	574532	529861	520344	3.85376e+06	4.07426e+06	3.98979e+06	44219.3	44219.3	44219.3	-	-	-
Rfn043586	[(2S,3R,4S,5S,6R)-3,4,5-trihydroxy-6-(hydroxymethyl)oxan-2-yl](2E,4E)-5-[(1R,3S,5S,8S)-3,8-dihydroxy-1,5-dimethyl-6-oxabicyclo[3.2.1]octan-8-yl]-3-methylpenta-2,4-dienoate	Others	Others	C21H32O10	443.19	281.14	444.2	[M-H]-	3	-	-	41536.8	52169.6	56964.4	4605.26	4605.26	4605.26	32566.8	48674.1	47971	-	-	-
pmn001394	2,3,5,4'-Tetrahydroxystilbene-2-O-glucoside	Others	Stilbene	C20H22O9	405.12	243.07	406.126	[M-H]-	2	82373-94-2	-	5.67197e+06	4.05015e+06	3.97427e+06	3.51629e+06	3.74099e+06	3.04363e+06	6.86421e+06	5.9988e+06	2.92096e+06	-	-	-
Zapn004520	gnetifolin E	Others	Stilbene	C21H24O9	419.13	257.08	420.142	[M-H]-	2	140671-07-4	-	26464.8	26464.8	26464.8	191747	132324	186634	260785	247149	212675	-	CM020311	MetMap152
Waptn03493	3,3',4,5'-Tetrahydroxybibenzyl	Others	Stilbene	C14H14O4	245.08	203.07	246.089	[M-H]-	2	22318-80-5	-	4.75424e+06	4.20814e+06	4.21266e+06	4.93301e+06	4.61469e+06	5.21979e+06	3.78565e+06	4.14181e+06	3.94492e+06	-	-	-
Lmtn002233	Androsin	Others	Ketone compounds	C15H20O8	327.11	165.05	328.116	[M-H]-	1	531-28-2	-	214536	229714	226660	42907.1	42907.1	42907.1	42907.1	42907.1	42907.1	-	-	-
Zahn007990	5-hydroxy-3,4-dimethyl-5-pentylfuran-2(5H)-one*	Others	Lactones	C11H18O3	197.12	153.13	198.126	[M-H]-	3	-	-	8565.91	6847.34	11463.9	7977.47	11072.3	7161	1369.47	1369.47	1369.47	-	-	-
mws0025	1,2,3-Trihydroxybenzene	Others	Others	C6H6O3	125.02	79.02	126.032	[M-H]-	3	87-66-1	C01108	33380.1	22462	29937.7	19559.6	47735.9	34693.6	3911.92	3911.92	3911.92	-	C01108	-
Safn003371	Ilicifolinoside A	Others	Others	C11H20O7	323.14	59.02	264.121	[M+CH3COOH-H]-	3	-	-	104667	78861.5	78873.6	71156.5	93016.5	99902.2	38062.5	58997.5	39629	-	-	-
MWSmce454	3,5-Dihydroxyacetophenone	Others	Ketone compounds	C8H8O3	151.04	65.04	152.047	[M-H]-	3	51863-60-6	-	24626.6	22976.9	63956.6	4595.38	4595.38	4595.38	61326.3	30585.7	26335.3	-	CM01678	MetMap139
Wasn001007	Isoascorbic acid 2-O-glucoside	Others	Vitamin	C12H18O11	337.08	277.06	338.085	[M-H]-	1	-	-	1204.05	1204.05	1204.05	12894.1	8557.11	9397.19	6020.23	10353.4	6656.21	-	-	-
mws1358	Catechol	Others	Others	C6H6O2	109.03	81.03	110.037	[M-H]-	3	120-80-9	C00090	90637.7	93681.6	131800	120796	133733	149607	113846	137347	98112.1	ko01100	C00090	-
MWSmce363	2,5-Dihydroxyacetophenone	Others	Ketone compounds	C8H8O3	151.04	108.02	152.047	[M-H]-	3	490-78-8	-	194788	257971	177170	135447	143533	119799	98191.9	57865.7	97696.4	-	CM01680	MetMap139
Waln006120	Octyl 6-O-Alpha-L-Arabinopyranosyl-Beta-D-Glucopyranoside	Others	Alcohol compounds	C19H36O10	423.22	291.18	424.231	[M-H]-	1	168288-07-1	-	115053	72781.3	62812.4	7478.12	7478.12	7478.12	43611	52129	37989.8	-	-	-
Zjbn102207	Dactylorhin E	Others	Others	C27H40O16	619.22	439.16	620.232	[M-H]-	2	-	-	25188.7	41534.8	101394	5037.75	5037.75	5037.75	5037.75	5037.75	5037.75	-	-	-
mws1297	Benzyl glucoside	Others	Others	C13H18O6	269.1	101.02	270.11	[M-H]-	3	4304-12-5	-	2872.84	2872.84	2872.84	2872.84	2872.84	2872.84	14364.2	29236.5	17329.6	-	-	-
mws0921	4-Coumaryl alcohol	Others	Alcohol compounds	C9H10O2	149.06	131.05	150.068	[M-H]-	3	3690-05-9	C02646	50394.3	71249	91713.1	151407	157116	134325	38396.1	55320	42168.7	ko00940,ko01100,ko01110	C02646	-
Lcfn121033	(3S,5R,6R,7E,9S)-megastigm-7-ene-3,5,6,9-tetrol3-(beta-D-glucopyranoside)	Others	Others	C18H30O10	405.18	243.12	406.184	[M-H]-	1	-	-	774969	774969	774969	5.20483e+06	4.21877e+06	3.87485e+06	774969	774969	774969	-	-	-
Zmln000899	Syringaldehyde-4-O-glucoside	Others	Aldehyde compounds	C15H20O9	343.11	181.05	344.111	[M-H]-	1	-	-	1.66546e+06	1.40415e+06	1.34446e+06	1.99699e+06	1.89213e+06	1.67946e+06	1.92368e+06	1.11308e+06	1.77435e+06	-	CM020537	MetMap156
Wahln02444	Hydroxytyrosol Glucoside*	Others	Alcohol compounds	C14H20O8	315.11	153.06	316.116	[M-H]-	1	76873-99-9	-	182976	212263	161299	190078	186586	209668	32259.8	32259.8	32259.8	-	-	-
pmn001553	Cimidahurinine*	Others	Alcohol compounds	C14H20O8	315.11	153.06	316.116	[M-H]-	1	142542-89-0	-	182976	212263	161299	190078	186586	209668	32259.8	32259.8	32259.8	-	-	-
Waptn02876	4-(2-hydroxyvinyl)benzene-1,2-diol Glucoside*	Others	Alcohol compounds	C14H18O8	313.09	151.04	314.1	[M-H]-	2	-	-	14742.3	14742.3	14742.3	14742.3	14742.3	14742.3	73711.4	94685.9	99158	-	-	-
Wasyqn5954	1-Octanol Rhamnosylglucoside	Others	Alcohol compounds	C20H38O10	497.22	291.18	438.247	[M+CH3COO]-	2	-	-	38137.1	21767.1	26756.9	21336.5	25550.4	40092.1	4267.3	4267.3	4267.3	-	-	-
MWS1848	Phenyl acetate	Others	Others	C8H8O2	135.05	92.03	136.052	[M-H]-	3	122-79-2	C00548	152338	58020.4	122679	180171	114333	79085.1	78603.4	57850	119685	-	C00548	-
Zmyn002321	4-Cresol	Others	Others	C7H8O	107.05	106.04	108.058	[M-H]-	3	106-44-5	C01468	56798.8	51269.4	65430.3	70809.4	44358.2	36080.4	11938.7	5999.03	9627.62	ko01100	C01468	-
Wbtn004921	9-hydroxy-2-(3-hydroxy-4-methoxyphenyl)-3-(hydroxymethyl)-12-methoxy-2,3-dihydro-1,4,5-trioxatetraphen-10-one	Others	Ketone compounds	C24H20O9	451.1	341.07	452.111	[M-H]-	3	-	-	279448	324594	220118	362730	138696	281396	274524	89892.9	345322	-	-	-
MWS4305	D-Erythrose	Others	Saccharides	C4H8O4	119.04	59.01	120.042	[M-H]-	3	583-50-6	C01796	662036	965493	552230	868860	1.04425e+06	1.56209e+06	714414	849753	911892	-	C01796	-
pme3009	trans-Aconitic acid	Organic acids	Organic acids	C6H6O6	175.02	98.98	174.016	[M+H]+	3	4023-65-8	C02341	210118	239666	287086	591096	541044	493180	354502	419545	312307	ko00660,ko01100	C02341	-
pme0274	6-Aminohexanoate	Organic acids	Organic acids	C6H13NO2	132.1	69.07	131.095	[M+H]+	3	60-32-2	C02378	3.89283e+06	3.70807e+06	4.10739e+06	4.79968e+06	4.98641e+06	4.63842e+06	2.71772e+06	2.7977e+06	2.79604e+06	ko01100	C02378	-
Zmdp000917	δ-Guanidinovaleric acid	Organic acids	Organic acids	C6H13N3O2	160.11	114.04	159.101	[M+H]+	2	462-93-1	C13688	654778	224045	236409	293358	388175	317339	600956	654659	802927	-	C13688	-
pme3017	2-Amino-2-methylpropanoate	Organic acids	Organic acids	C4H9NO2	104.07	58.07	103.063	[M+H]+	2	62-57-7	C03665	2.33685e+07	2.46971e+07	2.40237e+07	2.96333e+07	2.91749e+07	2.82393e+07	3.46191e+07	3.69362e+07	3.64697e+07	-	C03665	-
pme3011	4-Aminobutanoate	Organic acids	Organic acids	C4H9NO2	104.07	69.03	103.063	[M+H]+	2	56-12-2	C00334	3.62998e+06	3.64936e+06	3.34904e+06	4.33677e+06	4.3493e+06	4.18237e+06	1.16003e+06	1.17871e+06	1.18769e+06	ko00250,ko00330,ko00410,ko00650,ko00760,ko01100	C00334	-
Zkep008998	o-Phosphohomoserine	Organic acids	Organic acids	C4H10NO6P	200.02	98.97	199.025	[M+H]+	2	4210-66-6	C01102	7.3461e+06	4.51424e+06	4.96623e+06	4.45547e+06	4.95236e+06	4.22996e+06	7.94297e+06	7.85239e+06	6.19666e+06	ko00260,ko01100,ko01110,ko01230	C01102	-
mws0567	4-Guanidinobutanoate	Organic acids	Organic acids	C5H11N3O2	146.09	87.04	145.085	[M+H]+	3	463-00-3	C01035	3.89976e+06	3.16877e+06	3.67852e+06	4.86838e+06	5.04021e+06	4.7276e+06	8.67949e+06	8.13149e+06	7.92615e+06	ko00330,ko01100	C01035	-
MWS5165	Diethyl 2-methyl-3-oxosuccinate	Organic acids	Organic acids	C9H14O5	203.09	129.05	202.084	[M+H]+	3	759-65-9	C04067	506406	506656	348039	298539	374023	223119	416160	479682	375982	-	C04067	-
pme0295	4-Acetamidobutanoate	Organic acids	Organic acids	C6H11NO3	146.08	86.06	145.074	[M+H]+	3	3025-96-5	C02946	708575	716926	538497	1.08466e+06	1.02302e+06	1.30869e+06	311444	88862.4	125372	ko00330,ko01100	C02946	-
MWS2085	Ethyl isobutyrate*	Organic acids	Organic acids	C6H12O2	117.09	89.06	116.084	[M+H]+	3	97-62-1	-	6619.13	6619.13	6619.13	59344	50125.2	67001.5	33095.6	38989.5	55097.2	-	-	-
MWS1752	Ethyl butyrate*	Organic acids	Organic acids	C6H12O2	117.09	89.06	116.084	[M+H]+	3	105-54-4	-	55849.6	86085.8	51785.9	29012.2	35969.8	45278.8	54683.7	54649.2	115110	-	-	-
MWS1798	2,4-Hexadienoic acid	Organic acids	Organic acids	C6H8O2	113.06	67.05	112.052	[M+H]+	3	110-44-1	-	247062	261640	163193	223169	155857	214618	606313	168892	542431	-	-	-
MWSslk038	6-Acetamidohexanoic acid	Organic acids	Organic acids	C8H15NO3	174.11	114.09	173.105	[M+H]+	3	57-08-9	-	121720	384253	358599	363093	449498	416819	451358	415607	303802	-	-	-
Zmjp003163	(-)-Jasmonic acid	Organic acids	Organic acids	C12H18O3	211.13	55.05	210.126	[M+H]+	3	77026-92-7	C08491	298712	200499	235969	329148	304583	374745	417048	258375	324515	ko00592,ko01100,ko01110,ko04075	C08491	-
mws0154	Shikimate	Organic acids	Organic acids	C7H10O5	173.05	93.03	174.053	[M-H]-	1	138-59-0	C00493	1.67669e+06	1.82699e+06	1.77969e+06	2.32871e+06	1.77864e+06	1.78481e+06	692372	592006	613389	ko00400,ko00996,ko00999,ko01100,ko01110,ko01230,ko01240	C00493	-
mws0275	Malate	Organic acids	Organic acids	C4H6O5	133.01	71.01	134.022	[M-H]-	1	636-61-3	C00711	1.06286e+06	1.16269e+06	1.13282e+06	2.40403e+06	2.26242e+06	2.17423e+06	2.25445e+06	2.07593e+06	1.80282e+06	-	C00711	-
Wayn000504	Malic acid-1-O-diglucoside	Organic acids	Organic acids	C16H26O15	457.12	341.11	458.127	[M-H]-	3	-	-	317515	269143	342623	703044	716402	682602	456967	507799	498706	-	-	-
Zmgn001448	2-Propylmalic Acid*	Organic acids	Organic acids	C7H12O5	175.06	115.04	176.069	[M-H]-	2	-	C05994	4.55831e+06	4.30526e+06	4.41419e+06	4.86527e+06	4.65628e+06	4.28092e+06	5.93955e+06	5.69132e+06	5.92092e+06	ko00620	C05994	-
Lmbn001754	(2R,3S)-3-Isopropylmalate*	Organic acids	Organic acids	C7H12O5	175.06	115.04	176.069	[M-H]-	2	921-28-8	C04411	4.55831e+06	4.30526e+06	4.41419e+06	4.86527e+06	4.65628e+06	4.28092e+06	5.93955e+06	5.69132e+06	5.92092e+06	ko00290,ko01100,ko01110,ko01210,ko01230	C04411	-
mws0972	6-Hydroxyhexanoic acid	Organic acids	Organic acids	C6H12O3	131.07	85.07	132.079	[M-H]-	3	1191-25-9	C06103	465854	416592	387716	431760	435948	508446	579683	498915	448580	-	C06103	-
mws0341	(R)-2-Hydroxyisocaproate	Organic acids	Organic acids	C6H12O3	131.07	85.07	132.079	[M-H]-	3	20312-37-2	C03264	125627	132763	173615	134575	171275	138384	97098.5	109476	122079	-	C03264	-
Zmgn000447	3-Phospho-D-glycerate	Organic acids	Organic acids	C3H7O7P	184.98	78.96	185.993	[M-H]-	3	820-11-1	C00197	6.97864e+06	6.93322e+06	6.63481e+06	3.61088e+06	4.30359e+06	4.01691e+06	4.89225e+06	5.07297e+06	5.43423e+06	ko00010,ko00030,ko00260,ko00270,ko00561,ko00630,ko00710,ko01100,ko01110,ko01200,ko01230,ko01240	C00197	-
pme3186	Glyceraldehyde 3-phosphate	Organic acids	Organic acids	C3H7O6P	168.99	78.96	169.998	[M-H]-	3	591-59-3	C00661	372634	376440	326078	235542	195481	229954	253226	272858	248635	-	C00661	-
Wasyqn1008	Dimethylglyceric Acid Glucoside	Organic acids	Organic acids	C11H20O9	295.1	59.01	296.111	[M-H]-	1	-	-	1.6653e+06	1.60185e+06	1.56727e+06	3.14336e+06	3.2362e+06	2.97095e+06	1.71343e+06	1.69277e+06	1.38929e+06	-	-	-
mws2125	Phosphoenolpyruvate	Organic acids	Organic acids	C3H5O6P	166.98	78.96	167.982	[M-H]-	3	138-08-9	C00074	2.40699e+06	2.58517e+06	2.42208e+06	1.41133e+06	1.63892e+06	1.60474e+06	1.69505e+06	1.73273e+06	1.66901e+06	ko00010,ko00020,ko00400,ko00440,ko00620,ko00710,ko00996,ko00999,ko01100,ko01110,ko01200,ko01230,ko01240	C00074	-
Lmgn002555	2-Propylglutaric acid	Organic acids	Organic acids	C8H14O4	173.08	59.01	174.089	[M-H]-	3	32806-62-5	C16658	2.13215e+06	2.0425e+06	1.88968e+06	1.02459e+06	1.19561e+06	1.0643e+06	1.39355e+06	1.30275e+06	1.23682e+06	-	C16658	-
pme2914	3-Hydroxy-3-methylglutarate	Organic acids	Organic acids	C6H10O5	161.05	99.05	162.053	[M-H]-	1	503-49-1	C03761	7.95423e+06	8.04811e+06	7.9006e+06	1.84633e+07	1.81163e+07	1.81883e+07	3.46021e+07	3.35235e+07	3.41143e+07	-	C03761	-
ML10176345	3-Dehydroshikimate	Organic acids	Organic acids	C7H8O5	171.03	109.03	172.037	[M-H]-	3	2922-42-1	C02637	1.07172e+06	1.17359e+06	1.16443e+06	1.75502e+06	1.48616e+06	1.28599e+06	677916	712108	762626	ko00400,ko00999,ko01100,ko01110,ko01230,ko01240	C02637	-
pme2710	Dihydrojasmonic acid	Organic acids	Organic acids	C12H20O3	211.13	167.14	212.141	[M-H]-	3	3572-64-3	-	1.98849e+06	2.54215e+06	2.60049e+06	7.74187e+06	7.93561e+06	7.97455e+06	879656	920909	1.15453e+06	-	-	-
mws0262	(R,R)-Tartaric acid	Organic acids	Organic acids	C4H6O6	149.01	87.01	150.016	[M-H]-	3	87-69-4	C00898	75307.3	149721	114853	228136	236618	243033	255066	155747	151906	ko00630,ko01100	C00898	-
Wayn000884	Citric acid glucoside	Organic acids	Organic acids	C12H18O12	353.07	111	354.08	[M-H]-	2	-	-	468493	417384	405138	636971	665727	739272	627323	693261	659564	-	-	-
Zmyn000453	Isocitrate*	Organic acids	Organic acids	C6H8O7	191.02	111.01	192.027	[M-H]-	1	320-77-4	C00311	3.08123e+06	3.30435e+06	2.98429e+06	6.73714e+06	6.48472e+06	6.73089e+06	2.6869e+06	2.67344e+06	2.73796e+06	ko00020,ko00630,ko01100,ko01110,ko01200,ko01210,ko01230,ko01240	C00311	-
Safn001079	(2S,3R)-2,3-dihydroxy-5-oxohexanedioic acid*	Organic acids	Organic acids	C6H8O7	191.02	111.01	192.027	[M-H]-	1	-	-	3.08123e+06	3.30435e+06	2.98429e+06	6.73714e+06	6.48472e+06	6.73089e+06	2.6869e+06	2.67344e+06	2.73796e+06	-	-	-
MWS3036	3-Hydroxyglutaric acid	Organic acids	Organic acids	C5H8O5	147.03	85.03	148.037	[M-H]-	3	638-18-6	-	1.11949e+06	966612	1.16576e+06	2.50059e+06	2.48102e+06	2.23499e+06	1.87418e+06	1.91368e+06	1.92901e+06	-	-	-
Lmhn007953	Hexylitaconic acid	Organic acids	Organic acids	C11H18O4	213.11	169.12	214.12	[M-H]-	3	-	-	55490.6	58200.5	66499.9	521526	516213	569055	29192.3	54870.4	59675.6	-	-	-
Wayn001528	(R)-2-Hydroxybutane-1,2,4-tricarboxylate	Organic acids	Organic acids	C7H10O7	205.03	111.01	206.043	[M-H]-	2	13052-73-8	C01251	2.56264e+07	2.51357e+07	2.65475e+07	4.13387e+07	4.13538e+07	4.3169e+07	3.03147e+07	2.96572e+07	2.93771e+07	ko00300,ko00620,ko01100,ko01110,ko01210,ko01230,ko01240	C01251	-
Wayn002279	Dihomocitric acid	Organic acids	Organic acids	C8H12O7	219.05	111.01	220.058	[M-H]-	3	-	-	7.10469e+06	7.41979e+06	8.2517e+06	6.8174e+06	7.15337e+06	7.7153e+06	8.72193e+06	1.17975e+07	8.10098e+06	-	-	-
MWS1882	Iminodiacetic acid	Organic acids	Organic acids	C4H7NO4	132.03	88.0403	133.038	[M-H]-	3	142-73-4	C19911	5.19263e+06	4.22931e+06	4.85454e+06	2.9541e+06	3.06118e+06	2.6764e+06	4.6209e+06	4.22459e+06	4.14535e+06	-	C19911	-
Zmgn000216	2-Hydroxyethylphosphonate	Organic acids	Organic acids	C2H7O4P	125	78.96	126.008	[M-H]-	3	22987-21-9	C06451	135763	166921	148080	163966	166223	154302	230582	203580	236629	ko00440,ko01100,ko01110	C06451	-
Walbn00518	3,4-dihydroxy-2-(d-glucopyranose-6-O-yl)butanoic acid	Organic acids	Organic acids	C10H18O10	297.08	117.02	298.09	[M-H]-	2	-	-	278584	217575	219413	416153	406313	416234	317802	323062	305054	-	-	-
Wamxn00597	Glucuronic acid xyloside	Organic acids	Organic acids	C11H18O11	325.08	175.03	326.085	[M-H]-	3	-	-	351523	332565	312042	374738	371964	312377	642763	531602	584154	-	-	-
Wasn003197	3-(Beta-D-Glucopyranosyloxy)-5-Hydroxyhexanoic Acid Methyl Ester	Organic acids	Organic acids	C13H24O9	323.13	179.06	324.142	[M-H]-	3	-	-	299677	325025	288511	231490	226812	232985	150403	179906	160164	-	-	-
MWS2040	Methanesulfonic acid	Organic acids	Organic acids	CH4O3S	94.98	79.96	95.9881	[M-H]-	3	75-75-2	C11145	4.20135e+06	4.00506e+06	4.07962e+06	2.56335e+06	2.60436e+06	2.59063e+06	4.63882e+06	4.26557e+06	4.29949e+06	ko00920,ko01100	C11145	-
Lmbn000216	3-Methylmalic acid	Organic acids	Organic acids	C5H8O5	147.03	57.0344	148.037	[M-H]-	3	152204-30-3	C06032	947876	931844	885895	2.20616e+06	2.06449e+06	2.17555e+06	1.12319e+06	1.11537e+06	1.05052e+06	ko00290,ko00660,ko01100,ko01210,ko01230	C06032	-
Lmbn001288	(S)-2-Acetolactate	Organic acids	Organic acids	C5H8O4	131.03	87.04	132.042	[M-H]-	3	71698-08-3	C06010	208094	217816	216497	195019	213346	205138	439956	403426	436997	ko00290,ko00650,ko00660,ko00770,ko01100,ko01110,ko01210,ko01230	C06010	-
pme0243	Glutaric acid*	Organic acids	Organic acids	C5H8O4	131.03	87.05	132.042	[M-H]-	3	110-94-1	C00489	472137	357106	546054	725835	706460	752278	516650	453268	482360	ko00071,ko00310,ko01100	C00489	-
pme3034	Ethylmalonic acid*	Organic acids	Organic acids	C5H8O4	131.03	87.05	132.042	[M-H]-	3	601-75-2	-	472137	357106	546054	725835	706460	752278	516650	453268	482360	-	-	-
Wasyqn2417	Homomevalonic Acid Glucoside	Organic acids	Organic acids	C13H24O9	323.14	59.02	324.142	[M-H]-	1	-	-	1.06424e+07	9.96142e+06	1.00337e+07	8.89416e+06	8.75063e+06	9.02543e+06	5.62262e+06	5.78693e+06	5.85035e+06	-	-	-
Lmbn000193	2-Hydroxy-3-oxopropanoate	Organic acids	Organic acids	C3H4O4	103	59.01	104.011	[M-H]-	3	2480-77-5	C01146	41256.4	66570	81630.1	183906	129047	114723	79591.4	59133.9	65624.5	ko00053,ko00630,ko01100	C01146	-
mws0281	Citrate	Organic acids	Organic acids	C6H8O7	191.02	111.01	192.027	[M-H]-	1	77-92-9	C00158	1.56257e+07	1.56613e+07	1.62716e+07	3.4176e+07	3.50623e+07	3.58227e+07	1.4557e+07	1.49466e+07	1.4419e+07	ko00020,ko00250,ko00630,ko01100,ko01110,ko01200,ko01210,ko01230,ko01240	C00158	-
mws0192	Succinate*	Organic acids	Organic acids	C4H6O4	117.02	73.03	118.027	[M-H]-	1	110-15-6	C00042	259917	268006	280940	753988	753747	799027	652525	570304	603015	ko00020,ko00190,ko00250,ko00310,ko00350,ko00360,ko00620,ko00630,ko00640,ko00650,ko00760,ko00920,ko01100,ko01110,ko01200	C00042	-
mws0470	Methylmalonic acid*	Organic acids	Organic acids	C4H6O4	117.019	73	118.027	[M-H]-	1	516-05-2	C02170	259917	268006	280940	753988	753747	799027	652525	570304	603015	ko00240,ko00280,ko00640,ko01100	C02170	-
mws0267	D-Glycerate	Organic acids	Organic acids	C3H6O4	105.02	105.02	106.027	[M-H]-	3	473-81-4	C00258	408065	383439	374026	307859	343523	255328	210537	211987	218769	ko00030,ko00260,ko00561,ko00630,ko01100,ko01110,ko01200	C00258	-
pmb3101	alpha-Isopropylmalate	Organic acids	Organic acids	C7H12O5	175.06	115.04	176.069	[M-H]-	1	49601-06-1	C02504	4.87711e+06	4.80447e+06	4.5664e+06	5.08818e+06	4.65396e+06	4.8616e+06	6.23918e+06	5.73022e+06	5.96038e+06	ko00290,ko00620,ko01100,ko01110,ko01210,ko01230	C02504	-
mws0147	β-Hydroxyisovaleric acid	Organic acids	Organic acids	C5H10O3	117.06	59.01	118.063	[M-H]-	3	625-08-1	C20827	1.01533e+06	920112	854072	796723	829165	808790	1.2081e+06	1.13563e+06	1.07962e+06	ko00280,ko01100	C20827	-
pme2380	2-Oxoglutarate	Organic acids	Organic acids	C5H6O5	145.01	101.02	146.022	[M-H]-	3	328-50-7	C00026	1.0806e+06	1.05032e+06	1.09486e+06	2.83772e+06	2.54412e+06	2.77949e+06	1.88653e+06	2.08115e+06	2.20374e+06	ko00020,ko00040,ko00053,ko00220,ko00250,ko00300,ko00310,ko00340,ko00430,ko00470,ko00630,ko00650,ko00660,ko00785,ko01100,ko01110,ko01200,ko01210,ko01230,ko01240	C00026	-
Lmyn000160	Mucic acid Dimethyl Ester	Organic acids	Organic acids	C8H14O8	237.06	87.01	238.069	[M-H]-	1	-	-	1.68618e+07	1.66404e+07	1.60478e+07	2.2165e+07	2.02617e+07	2.0827e+07	2.53034e+07	2.26652e+07	2.09748e+07	-	-	-
Zmln000282	Hibiscus acid	Organic acids	Organic acids	C6H8O8	207.02	189	208.022	[M-H]-	3	6205-14-7	-	8.83601e+06	7.76041e+06	8.5559e+06	1.08553e+07	1.04812e+07	1.09846e+07	1.1007e+07	1.03575e+07	1.08008e+07	-	-	-
Lcsn002223	12-Hydroxyjasmonic Acid Glucoside	Organic acids	Organic acids	C18H28O9	387.16	59.01	388.173	[M-H]-	2	124649-25-8	-	1.52682e+06	814909	2.5307e+06	1.74214e+06	2.02224e+06	949306	969569	957666	738803	-	-	-
Wmzn000227	2,2-Dimethylsuccinic acid	Organic acids	Organic acids	C6H10O4	145.06	109.04	146.058	[M-H]-	2	597-43-3	-	3.77453e+06	3.65387e+06	4.35719e+06	3.49646e+06	3.82474e+06	3.60624e+06	3.57824e+06	3.33743e+06	3.7305e+06	-	-	-
Zayn001165	Malic acid-1-O-glucopyranoside	Organic acids	Organic acids	C10H16O10	295.07	133.01	296.074	[M-H]-	3	-	-	310224	321531	311065	472189	460382	427490	412388	319995	405589	-	-	-
Wayn000597	Citric acid-1-O-diglucoside	Organic acids	Organic acids	C18H28O17	515.12	111.01	516.133	[M-H]-	2	-	-	733975	798400	758827	963204	1.08036e+06	1.06498e+06	791890	924030	703538	-	-	-
pmb2826	(S)-2-Methylmalate	Organic acids	Organic acids	C5H8O5	147.03	87.01	148.037	[M-H]-	3	-	C02614	1.14994e+06	1.05613e+06	1.07134e+06	2.23369e+06	2.06304e+06	2.10428e+06	907699	1.0566e+06	938906	ko00660,ko01100	C02614	-
Lmrn002746	2-Hydroxy-4-methylpentanoic acid	Organic acids	Organic acids	C6H12O3	131.07	85.07	132.079	[M-H]-	3	498-36-2	-	656888	565025	651669	363110	357248	346226	390416	372946	381873	-	-	-
pme3207	cis,cis-Muconate	Organic acids	Organic acids	C6H6O4	141.02	59.01	142.027	[M-H]-	3	1119-72-8	C02480	2.36094e+06	984530	1.05437e+06	574395	647200	1.64218e+06	937503	802173	679783	ko01100	C02480	-
Lmgn000219	Succinate semialdehyde	Organic acids	Organic acids	C4H6O3	101.02	55.02	102.032	[M-H]-	3	692-29-5	C00232	34723.2	36172.4	48524.3	56775.2	36555.8	39820.1	65862.4	62901.5	69996.8	ko00250,ko00350,ko00650,ko00750,ko00760,ko01100,ko01200	C00232	-
mws0924	2-Methylglutaric acid*	Organic acids	Organic acids	C6H10O4	145.05	101.06	146.058	[M-H]-	3	617-62-9	-	1.14214e+06	963176	1.12557e+06	617476	615204	505522	790227	711291	744752	-	-	-
mws0208	Adipic Acid*	Organic acids	Organic acids	C6H10O4	145.051	101	146.058	[M-H]-	3	124-04-9	C06104	1.14214e+06	963176	1.12557e+06	617476	615204	505522	790227	711291	744752	ko01100	C06104	-
Lmgn000242	2-Dehydro-3-deoxy-D-galactonate	Organic acids	Organic acids	C6H10O6	177.04	113.02	178.048	[M-H]-	3	56742-44-0	C01216	202698	140714	191087	205505	193612	231728	186490	192439	170528	ko00052,ko01100	C01216	-
Wcdn003654	Feruloyl Lactate	Organic acids	Organic acids	C13H14O7	281.06	178.03	282.074	[M-H]-	1	-	-	287520	231982	301400	198973	215395	183737	1.38146e+06	1.13724e+06	1.35787e+06	-	-	-
Lmbn001467	5-Acetamidopentanoate	Organic acids	Organic acids	C7H13NO3	158.08	116.07	159.089	[M-H]-	2	1072-10-2	C03087	169506	134844	186206	209872	219953	185401	196157	173345	168845	ko00310,ko01100	C03087	-
Zmgn000217	Itaconate	Organic acids	Organic acids	C5H6O4	129.02	85.03	130.027	[M-H]-	3	97-65-4	C00490	248988	210539	222294	487077	476117	440609	220901	230869	233104	ko00660,ko01100	C00490	-
Wasyqn0472	Citric Acid glucuronide	Organic acids	Organic acids	C12H16O13	367.05	191.02	368.059	[M-H]-	2	-	-	138043	115988	121504	184390	126180	154534	152298	167718	136999	-	-	-
mws0277	Quinate	Organic acids	Organic acids	C7H12O6	191.06	85.03	192.063	[M-H]-	1	77-95-2	C00296	3.25569e+06	3.42196e+06	3.54381e+06	8.91602e+06	8.81909e+06	8.93131e+06	2.95511e+06	3.21605e+06	3.2647e+06	ko00400,ko01100	C00296	-
Waptn04416	2-trans-abscisic acid D-glucosyl ester	Organic acids	Organic acids	C21H30O9	485.2	263.13	426.189	[M+CH3COO]-	2	-	-	98223.6	92302.7	160456	58317.2	66327.4	86538.8	89617.2	138672	190810	-	-	-
pmn001684	Tuberonic Acid	Organic acids	Organic acids	C12H18O4	225.11	147.08	226.12	[M-H]-	3	124649-26-9	-	26040.2	22131.1	18499.2	20054.4	38970.4	38747.8	17788.3	21653.6	22776.5	-	-	-
Lmmn000806	Dimethylmalonic acid*	Organic acids	Organic acids	C5H8O4	131.03	87.05	132.042	[M-H]-	3	595-46-0	-	196429	199024	197760	192909	159774	190280	352643	332239	389529	-	-	-
mws0473	2-Methylsuccinic acid	Organic acids	Organic acids	C5H8O4	131.03	87.05	132.042	[M-H]-	3	498-21-5	-	196429	199024	197760	192909	159774	190280	352643	332239	389529	-	-	-
Lmmn002164	Monomethyl succinate*	Organic acids	Organic acids	C5H8O4	131.035	87.0452	132.042	[M-H]-	3	3878-55-5	-	196429	199024	197760	192909	159774	190280	352643	332239	389529	-	-	-
Safn002037	2-[4-[(1R,2R)-1,2-dihydroxypropyl]phenoxy]-6-(hydroxymethyl)oxane-3,4,5-triol	Organic acids	Organic acids	C15H22O8	329.12	167.07	330.132	[M-H]-	2	-	-	1.14896e+06	986167	830849	915711	1.07416e+06	860420	1.35446e+06	1.2207e+06	1.1126e+06	-	-	-
mws0376	Fumarate	Organic acids	Organic acids	C4H4O4	115	71.01	116.011	[M-H]-	1	110-17-8	C00122	1.66094e+06	1.8633e+06	1.69869e+06	4.65217e+06	2.02641e+06	2.74553e+06	4.0955e+06	3.20031e+06	3.36443e+06	ko00020,ko00190,ko00220,ko00250,ko00350,ko00360,ko00620,ko00650,ko00760,ko01100,ko01110,ko01200	C00122	-
pme1975	Malonate	Organic acids	Organic acids	C3H4O4	103	59.01	104.011	[M-H]-	3	141-82-2	C00383	499327	536742	567079	1.22101e+06	1.20265e+06	1.17621e+06	716314	717615	661678	ko00061,ko00240,ko00410,ko01100,ko01212	C00383	-
ZbBn000907	Shikimic Acid-3-Phosphate	Organic acids	Organic acids	C7H11O8P	253.01	96.97	254.019	[M-H]-	3	114489-69-9	C03175	335022	280261	265910	58229.4	107706	82145.3	141119	125665	145303	ko00400,ko01100,ko01110,ko01230	C03175	-
mws0236	Taurine	Organic acids	Organic acids	C2H7NO3S	124.01	79.96	125.015	[M-H]-	3	107-35-7	C00245	1.01576e+06	1.15636e+06	1.02955e+06	552227	593694	498530	683125	580703	698339	ko00430,ko00920,ko01100,ko02010	C00245	-
Lmbn002072	2-Propylsuccinic acid	Organic acids	Organic acids	C7H12O4	159.07	97.07	160.074	[M-H]-	3	618-57-5	C16657	31389.3	17867.4	27533.3	32422.7	30064.6	31711	24910.7	14429.9	20011.5	-	C16657	-
pme2601	3-Hydroxypropanoate	Organic acids	Organic acids	C3H6O3	89.02	59.01	90.0317	[M-H]-	3	503-66-2	C01013	59829.6	71407.7	43671	145125	143969	91742.5	87118.7	122893	84427.4	ko00240,ko00410,ko00640,ko01100,ko01200	C01013	-
Wayn000918	Isocitric acid-1-O-diglucoside	Organic acids	Organic acids	C18H28O17	515.12	111.01	516.133	[M-H]-	2	-	-	145817	113197	98216.8	155226	190624	165434	155200	151133	132914	-	-	-
Wasn003258	Glucosyl 2-Hydroxy-4-Methylpentanoic Acid	Organic acids	Organic acids	C12H22O8	293.12	131.07	294.132	[M-H]-	1	-	-	903444	1.1277e+06	1.00946e+06	1.09005e+06	1.48656e+06	1.64632e+06	1.08045e+06	1.04259e+06	979200	-	-	-
mws1167	Oxaloacetate	Organic acids	Organic acids	C4H4O5	131	59.01	132.006	[M-H]-	3	328-42-7	C00036	104443	81068.4	110775	194118	44040.8	71111.7	124907	102223	78238	ko00010,ko00020,ko00250,ko00470,ko00620,ko00630,ko00710,ko00999,ko01100,ko01110,ko01200,ko01210,ko01230,ko01240	C00036	-
Lmzn001582	5'-Glucosyloxyjasmanic acid	Organic acids	Organic acids	C18H28O9	387.17	207.1	388.173	[M-H]-	3	-	-	260997	225800	231653	357695	380922	378446	137410	175136	189583	-	-	-
Wasn006732	Dihydroabscisic Acid 4'-O-glucoside	Organic acids	Organic acids	C21H32O9	427.2	247.13	428.205	[M-H]-	2	-	-	72034.4	79732.7	76631.2	79778.6	46807.9	102711	119247	116107	139425	-	-	-
pme3154	(R)-Mevalonate	Organic acids	Organic acids	C6H12O4	147.07	59.01	148.074	[M-H]-	3	150-97-0	C00418	332272	352965	441658	706524	804376	738270	597639	499198	529776	ko00900,ko01100,ko01110	C00418	-
pme1974	Pyruvate	Organic acids	Organic acids	C3H4O3	87.01	59.01	88.016	[M-H]-	3	127-17-3	C00022	67081.3	44422.5	58754	37301.3	51195.9	29683.7	126540	147147	117203	ko00010,ko00020,ko00030,ko00040,ko00053,ko00250,ko00260,ko00261,ko00270,ko00290,ko00330,ko00350,ko00360,ko00430,ko00440,ko00470,ko00620,ko00630,ko00650,ko00660,ko00710,ko00730,ko00760,ko00770,ko00785,ko00900,ko01100,ko01110,ko01200,ko01210,ko01230,ko01240	C00022	-
Wasn007507	Dehydroxy-Dihydroabscisic Acid 4'-O-glucoside	Organic acids	Organic acids	C21H32O8	411.2	249.15	412.21	[M-H]-	3	-	-	42984.3	33477.1	35286.1	16907	25912.7	21262.1	35876.2	29463.2	34876.8	-	-	-
Lmbn001676	3-Hydroxy-3-Methyl-2-Oxopentanoic Acid	Organic acids	Organic acids	C6H10O4	145.05	101.06	146.058	[M-H]-	3	-	C14463	101070	78047.7	97837.6	60778.6	62634.6	49273	96259.5	75716.1	82082.7	ko00290,ko01110,ko01210	C14463	-
mws1598	3-Amino-1-propionic sulfonic acid	Organic acids	Organic acids	C3H9NO3S	138.02	79.96	139.03	[M-H]-	3	3687-18-1	C03349	33282.6	26186.5	28041.4	21308.8	22179.3	21927.5	40732.3	15845.3	34657.6	-	C03349	-
Lcsn006884	2,2'-(3-methylcyclohexane-1,1-diyl)diacetic acid	Organic acids	Organic acids	C11H18O4	213.11	169.12	214.12	[M-H]-	3	5345-12-0	-	1.0711e+06	996648	1.06474e+06	1.15922e+06	1.20682e+06	1.13916e+06	461329	403714	438089	-	-	-
HJN072	Litchioside C	Organic acids	Organic acids	C19H34O9	405.21	225.16	406.22	[M-H]-	2	-	-	35584.4	15204.8	23426	100427	73661.8	26302	3040.97	3040.97	3040.97	-	-	-
Lcfn121145	3-Dehydro-L-gulonate6-phosphate	Organic acids	Organic acids	C6H11O10P	273	96.97	274.009	[M-H]-	3	-	C14899	88478.5	104759	119569	132698	96434.8	90221.8	65735.2	95109.1	80868.9	ko00040,ko00053,ko01100	C14899	-
mws0574	2-Hydroxyisobutyric acid*	Organic acids	Organic acids	C4H8O3	103.04	57.04	104.047	[M-H]-	3	594-61-6	C21297	88255.2	92892.5	77072.7	81427.5	81236.7	76307.7	74466.9	79008	70562.9	-	C21297	-
mws0206	2-Hydroxybutanoic acid*	Organic acids	Organic acids	C4H8O3	103.04	57.04	104.047	[M-H]-	3	3347-90-8	C05984	88255.2	92892.5	77072.7	81427.5	81236.7	76307.7	74466.9	79008	70562.9	ko00640	C05984	-
Lmgn002184	2-Oxoheptanedionic acid	Organic acids	Organic acids	C7H10O5	173.05	93.03	174.053	[M-H]-	3	17126-90-8	C16588	131614	94929.8	136428	7581.89	7581.89	7581.89	58812.6	37909.5	41663.8	ko01100,ko01210,ko01240	C16588	-
Lmgn000224	Methyloxaloacetate	Organic acids	Organic acids	C5H6O5	145.01	57.03	146.022	[M-H]-	3	-	C06030	80702.6	104749	75589	106492	71229.4	109216	73223.4	70575.1	91968.7	ko00660	C06030	-
pme0183	Isoguanine	Nucleotides and derivatives	Nucleotides and derivatives	C5H5N5O	152.06	135.03	151.049	[M+H]+	3	3373-53-3	-	1.05845e+06	1.26448e+06	1.28601e+06	1.08972e+06	1.04907e+06	1.14016e+06	957797	993033	954199	-	-	-
Lmqp000329	Aminoimidazole ribotide	Nucleotides and derivatives	Nucleotides and derivatives	C8H14N3O7P	296.07	104.11	295.057	[M+H]+	1	25635-88-5	C03373	1.7029e+07	1.28548e+07	1.31546e+07	5.43322e+06	5.69253e+06	5.15576e+06	1.19191e+07	9.80304e+06	1.02161e+07	ko00230,ko00730,ko00860,ko01100,ko01110,ko01240	C03373	-
MWS4354	N6-methyladenosine	Nucleotides and derivatives	Nucleotides and derivatives	C11H15N5O4	282.12	150.08	281.112	[M+H]+	3	1867-73-8	-	259321	272689	337165	751760	816782	742816	291484	327656	288168	-	-	-
MWSHC2054	Adenine	Nucleotides and derivatives	Nucleotides and derivatives	C5H5N5	136.06	119.04	135.054	[M+H]+	3	73-24-5	C00147	6.77044e+06	7.19964e+06	7.3064e+06	6.91126e+06	6.57245e+06	6.20143e+06	6.07206e+06	6.44877e+06	6.30634e+06	ko00230,ko00908,ko01100,ko01110,ko01232	C00147	-
mws0675	Nicotinamide D-ribonucleotide	Nucleotides and derivatives	Nucleotides and derivatives	C11H15N2O8P	335.06	123.06	334.057	[M+H]+	3	1094-61-7	C00455	1.56185e+06	1.63002e+06	1.28575e+06	530915	536482	520404	870245	1.22666e+06	1.67748e+06	ko00760,ko01100	C00455	-
pmc0281	Ribosyladenosine	Nucleotides and derivatives	Nucleotides and derivatives	C15H21N5O8	400.15	136.06	399.139	[M+H]+	3	-	-	1.93637e+07	1.8301e+07	1.8426e+07	2.76908e+07	2.63503e+07	2.58936e+07	2.46163e+07	2.39435e+07	2.42926e+07	-	-	-
pmc0066	2'-Deoxyinosine 5'-phosphate	Nucleotides and derivatives	Nucleotides and derivatives	C10H13N4O7P	333.06	137.05	332.052	[M+H]+	3	3393-18-8	C06196	8.70499e+07	9.18844e+07	1.0124e+08	4.02662e+07	3.40016e+07	3.76841e+07	6.21706e+07	7.56745e+07	7.32736e+07	ko00230,ko01232	C06196	-
MWSslk102	6-Chloropurine	Nucleotides and derivatives	Nucleotides and derivatives	C5H3ClN4	155.01	119.04	154.005	[M+H]+	3	87-42-3	-	1.32635e+07	1.31683e+07	1.27574e+07	1.20563e+07	1.26887e+07	1.23632e+07	1.26742e+07	1.25019e+07	1.25198e+07	-	-	-
pme3337	Succinyladenosine	Nucleotides and derivatives	Nucleotides and derivatives	C14H17N5O8	384.12	252.07	383.108	[M+H]+	2	4542-23-8	-	1.5836e+07	1.57118e+07	1.64191e+07	2.28185e+07	2.36973e+07	2.4274e+07	1.917e+07	1.87953e+07	1.81225e+07	-	-	-
pmb0998	GMP	Nucleotides and derivatives	Nucleotides and derivatives	C10H14N5O8P	364.07	152.06	363.058	[M+H]+	3	85-32-5	C00144	103043	138026	153570	174781	143167	167547	115735	76970	120125	ko00230,ko01100,ko01232	C00144	-
pme3184	dAMP	Nucleotides and derivatives	Nucleotides and derivatives	C10H14N5O6P	332.08	136.06	331.068	[M+H]+	3	653-63-4	C00360	825171	839930	800439	1.10931e+06	989046	1.01718e+06	726781	807489	838459	ko00230,ko01100,ko01232	C00360	-
pmb0532	IMP	Nucleotides and derivatives	Nucleotides and derivatives	C10H13N4O8P	349.05	137.05	348.047	[M+H]+	3	131-99-7	C00130	917413	1.01817e+06	988780	937468	767416	823132	633020	587723	636768	ko00230,ko01100,ko01110,ko01232,ko01240	C00130	-
pmb0530	NAD+	Nucleotides and derivatives	Nucleotides and derivatives	C21H27N7O14P2	664.12	136.06	663.109	[M+H]+	3	53-84-9	C00003	1.82089e+06	1.29128e+06	2.23504e+06	1.9402e+06	1.58707e+06	1.69967e+06	2.44046e+06	1.76437e+06	1.0889e+06	ko00190,ko00730,ko00760,ko01100,ko01240,ko04148	C00003	-
Wcfp002357	N6-Threonylcarbamoyladenosine	Nucleotides and derivatives	Nucleotides and derivatives	C15H20N6O8	413.14	162.04	412.134	[M+H]+	3	24719-82-2	-	53890	69058.9	44679.1	60511	99678	76530.8	82198.5	89619.3	91957.9	-	-	-
MWSmce295	1-Arabinosyluracil	Nucleotides and derivatives	Nucleotides and derivatives	C9H12N2O6	245.07	113.03	244.07	[M+H]+	3	3083-77-0	C16745	589596	471349	440743	754909	839389	771413	436595	615595	446440	-	C16745	-
Lmcp002302	N6-(2-Hydroxyethyl)adenosine*	Nucleotides and derivatives	Nucleotides and derivatives	C12H17N5O5	312.13	180.09	311.123	[M+H]+	2	4338-48-1	-	275198	217247	231078	535791	568214	388002	182994	145676	129428	-	-	-
mws0847	1-Methyladenine	Nucleotides and derivatives	Nucleotides and derivatives	C6H7N5	150.08	133.05	149.07	[M+H]+	3	5142-22-3	C02216	61785.2	69034.1	78363.4	205744	256404	198691	74667.5	49848.9	96151.8	-	C02216	-
pme1178	Guanosine	Nucleotides and derivatives	Nucleotides and derivatives	C10H13N5O5	284.1	152.06	283.092	[M+H]+	1	118-00-3	C00387	1.90084e+06	1.78891e+06	1.69169e+06	1.43165e+06	1.9014e+06	1.53951e+06	858277	996641	926258	ko00230,ko01100,ko01232,ko02010	C00387	-
MWSslk257	CMP	Nucleotides and derivatives	Nucleotides and derivatives	C9H14N3O8P	324.06	112.05	323.052	[M+H]+	3	63-37-6	C00055	311762	257253	235968	153096	190638	181103	238147	224927	239289	ko00240,ko01100,ko01232	C00055	-
pme1109	Guanine	Nucleotides and derivatives	Nucleotides and derivatives	C5H5N5O	152.06	135.03	151.049	[M+H]+	1	73-40-5	C00242	1.27508e+06	1.44956e+06	1.38638e+06	1.97194e+06	1.4573e+06	1.91327e+06	1.01435e+06	760491	798309	ko00230,ko01100,ko01232	C00242	-
pmb0981	AMP	Nucleotides and derivatives	Nucleotides and derivatives	C10H14N5O7P	348.07	136.06	347.063	[M+H]+	3	61-19-8	C00020	1.51137e+07	1.35472e+07	1.51622e+07	1.30232e+07	1.36244e+07	1.32217e+07	9.83633e+06	1.01966e+07	8.98084e+06	ko00230,ko00908,ko01100,ko01110,ko01232,ko01240	C00020	-
pme3967	2-(Dimethylamino)guanosine*	Nucleotides and derivatives	Nucleotides and derivatives	C12H17N5O5	312.13	180.09	311.123	[M+H]+	2	2140-67-2	-	345638	308721	230805	467913	462901	378265	240524	146708	139373	-	-	-
MWS2027	Barbiturate	Nucleotides and derivatives	Nucleotides and derivatives	C4H4N2O3	129.03	69	128.022	[M+H]+	3	67-52-7	C00813	6.0136e+06	5.28437e+06	5.36428e+06	7.34056e+06	7.37993e+06	7.40227e+06	4.32444e+06	4.92959e+06	4.67715e+06	ko00240,ko01100	C00813	-
pme3732	Cytidine	Nucleotides and derivatives	Nucleotides and derivatives	C9H13N3O5	244.09	112.05	243.085	[M+H]+	3	65-46-3	C00475	353344	268991	382750	147740	266505	272276	223884	144439	233396	ko00240,ko01100,ko01232,ko02010	C00475	-
pmb0964	Isopentenyladenine-7-N-glucoside	Nucleotides and derivatives	Nucleotides and derivatives	C16H23N5O5	366.18	204.12	365.17	[M+H]+	3	-	-	2.6792e+06	2.06812e+06	2.28344e+06	1.38852e+06	1.50833e+06	2.19969e+06	1.8408e+06	1.82219e+06	1.69476e+06	-	-	-
mws1715	Cordycepin*	Nucleotides and derivatives	Nucleotides and derivatives	C10H13N5O3	252.11	136.06	251.102	[M+H]+	3	73-03-0	C08431	486753	379799	461083	722159	761494	647369	4.50002e+06	4.86893e+06	4.6481e+06	-	C08431	-
MWSmce116	5'-Deoxyadenosine*	Nucleotides and derivatives	Nucleotides and derivatives	C10H13N5O3	252.1	136.06	251.102	[M+H]+	3	4754-39-6	C05198	680861	613731	624915	1.06681e+06	1.09956e+06	1.01749e+06	6.7161e+06	6.53273e+06	6.91248e+06	-	C05198	-
pme1474	5'-Methylthioadenosine	Nucleotides and derivatives	Nucleotides and derivatives	C11H15N5O3S	298.1	136.06	297.09	[M+H]+	1	2457-80-9	C00170	5.51004e+07	5.61609e+07	5.85505e+07	6.53136e+07	8.08211e+07	7.3545e+07	4.9995e+07	5.38147e+07	4.91747e+07	ko00270,ko00908,ko01100	C00170	-
pme3961	Deoxyadenosine*	Nucleotides and derivatives	Nucleotides and derivatives	C10H13N5O3	252.11	136.06	251.102	[M+H]+	3	958-09-8	C00559	848186	830282	1.0087e+06	1.32822e+06	1.36098e+06	1.12544e+06	8.79486e+06	8.88997e+06	7.82843e+06	ko00230,ko01100,ko01232,ko02010	C00559	-
MWSmce333	Isoguanosine	Nucleotides and derivatives	Nucleotides and derivatives	C10H13N5O5	284.1	152.06	283.092	[M+H]+	3	1818-71-9	C08432	456986	171492	375009	230724	160709	338159	212007	198507	220557	-	C08432	-
MWS2984	8-Azaguanine	Nucleotides and derivatives	Nucleotides and derivatives	C4H4N6O	153.05	136.03	152.045	[M+H]+	3	134-58-7	-	381952	276961	316222	490357	494378	459010	430308	514587	421510	-	-	-
pmb0374	2-Aminopurine	Nucleotides and derivatives	Nucleotides and derivatives	C5H5N5	136.06	119.04	135.054	[M+H]+	2	452-06-2	-	1.05747e+07	1.00888e+07	1.16634e+07	3.72552e+06	3.71857e+06	3.26576e+06	3.43223e+06	4.03468e+06	7.81861e+06	-	-	-
pme1266	3-Methylxanthine	Nucleotides and derivatives	Nucleotides and derivatives	C6H6N4O2	167.06	124.05	166.049	[M+H]+	3	1076-22-8	C16357	165952	148111	52648.4	41802.2	157031	160319	162865	53174.4	94202.6	ko00232,ko01100,ko01110	C16357	-
mws0572	5-Methylcytosine	Nucleotides and derivatives	Nucleotides and derivatives	C5H7N3O	126.07	109.04	125.059	[M+H]+	3	554-01-8	C02376	336127	376517	381781	536866	697231	431899	424037	430692	413539	ko00240,ko01100	C02376	-
pme1173	Allopurinol	Nucleotides and derivatives	Nucleotides and derivatives	C5H4N4O	137.05	110.03	136.038	[M+H]+	3	315-30-0	-	97524.8	113814	85041.8	184042	158225	232921	171185	81105.4	152945	-	-	-
Hmhp001812	2'-O-Methyladenosine	Nucleotides and derivatives	Nucleotides and derivatives	C11H15N5O4	282.12	136.06	281.112	[M+H]+	3	2140-79-6	-	400824	387671	451877	812031	812048	794212	430343	395620	440710	-	-	-
MWSslk118	2,2'-Cyclouridine	Nucleotides and derivatives	Nucleotides and derivatives	C9H10N2O5	227.07	136.04	226.059	[M+H]+	3	3736-77-4	-	91594	105612	144459	95337.2	186403	111646	194528	122259	180306	-	-	-
MWSmce613	CDP-choline	Nucleotides and derivatives	Nucleotides and derivatives	C14H26N4O11P2	489.12	264.04	488.107	[M+H]+	3	987-78-0	C00307	137559	99021.7	102849	203032	138362	76065.9	125964	129489	139806	ko00564,ko01100	C00307	-
MWS4525	6-O-methylguanine	Nucleotides and derivatives	Nucleotides and derivatives	C6H7N5O	166.07	124.05	165.065	[M+H]+	3	20535-83-5	-	155192	152992	165282	353254	329574	362232	160228	171776	186365	-	-	-
pme1119	Inosine	Nucleotides and derivatives	Nucleotides and derivatives	C10H12N4O5	269.09	137.05	268.081	[M+H]+	3	58-63-9	C00294	293788	353991	326507	137436	154684	189170	283229	216964	250739	ko00230,ko01100,ko01232,ko02010	C00294	-
pme1194	Deoxycytidine	Nucleotides and derivatives	Nucleotides and derivatives	C9H13N3O4	228.1	112.05	227.091	[M+H]+	3	951-77-9	C00881	572662	455446	447001	312471	524825	455696	671774	573884	642316	ko00240,ko01100,ko01232,ko02010	C00881	-
mws0852	Methotrexate	Nucleotides and derivatives	Nucleotides and derivatives	C20H22N8O5	455.18	308.13	454.171	[M+H]+	3	59-05-2	C01937	60048.2	65025	60757.4	34189.1	41739.8	27358.8	24036.2	23468.1	41484.5	-	C01937	-
Wcjp001256	9-Alpha-Ribofuranosyladenine*	Nucleotides and derivatives	Nucleotides and derivatives	C10H13N5O4	268.1	136.06	267.097	[M+H]+	1	-	-	104455	104455	104455	538034	751450	545254	743463	697004	764242	-	-	-
Zmsp001773	9-Arabinosyladenine*	Nucleotides and derivatives	Nucleotides and derivatives	C10H13N5O4	268.11	136.07	267.097	[M+H]+	1	-	-	104455	104455	104455	538034	751450	545254	743463	697004	764242	-	-	-
pme0230	Adenosine*	Nucleotides and derivatives	Nucleotides and derivatives	C10H13N5O4	268.1	136.06	267.097	[M+H]+	1	58-61-7	C00212	104105	104105	104105	104105	104105	104105	735597	738225	104105	ko00230,ko01100,ko01232,ko02010	C00212	-
Zmjp000966	Vidarabine	Nucleotides and derivatives	Nucleotides and derivatives	C10H13N5O4	268.11	136.06	267.097	[M+H]+	3	5536-17-4	-	97589.5	97589.5	97589.5	97589.5	97589.5	97589.5	808268	748514	752877	-	-	-
Zmmp000969	5-Ribofuranosylnicotinamide	Nucleotides and derivatives	Nucleotides and derivatives	C11H14N2O5	255.1	123.06	254.09	[M+H]+	3	107325-67-7	-	2.54643e+06	2.40068e+06	1.21911e+06	2.40276e+06	2.65794e+06	2.73403e+06	2.15195e+06	1.6413e+06	1.73365e+06	-	-	-
pme0152	5,6-Dihydrothymine	Nucleotides and derivatives	Nucleotides and derivatives	C5H8N2O2	129.07	84.04	128.059	[M+H]+	3	696-04-8	C00906	388138	207376	268730	668103	606003	661353	211562	187004	202784	-	C00906	-
pme1184	Deoxyguanosine	Nucleotides and derivatives	Nucleotides and derivatives	C10H13N5O4	268.1	152.06	267.097	[M+H]+	3	961-07-9	C00330	1.74232e+06	1.76853e+06	1.74907e+06	1.0488e+06	1.09167e+06	956044	838511	763082	606588	ko00230,ko01100,ko01232,ko02010	C00330	-
pme0033	Hypoxanthine	Nucleotides and derivatives	Nucleotides and derivatives	C5H4N4O	137.05	119.04	136.038	[M+H]+	3	68-94-0	C00262	265645	246050	397147	1.39531e+06	1.83147e+06	1.50439e+06	53447.3	270374	266951	ko00230,ko01100,ko01232	C00262	-
pmf0289	Riboprine	Nucleotides and derivatives	Nucleotides and derivatives	C15H21N5O4	336.17	148.06	335.159	[M+H]+	3	7724-76-7	C16427	1030.68	1030.68	1030.68	1030.68	1030.68	1030.68	34457.4	5153.38	28248.6	ko00908,ko01110	C16427	-
MW0156492	S-Adenosylhomocysteine-d4	Nucleotides and derivatives	Nucleotides and derivatives	C14H16D4N6O5S	389.16	191.15	388.147	[M+H]+	3	-	-	74499.9	34199.5	78431.7	6839.9	6839.9	6839.9	103310	35843.9	137437	-	-	-
Rn00844	dGDP*	Nucleotides and derivatives	Nucleotides and derivatives	C10H15N5O10P2	426.02	158.93	427.029	[M-H]-	3	-	-	2.06914e+06	2.11763e+06	1.40149e+06	1.8457e+06	1.25807e+06	1.10873e+06	1.41747e+06	1.62607e+06	1.45973e+06	-	-	-
pme2117	ADP*	Nucleotides and derivatives	Nucleotides and derivatives	C10H15N5O10P2	426.02	158.93	427.029	[M-H]-	3	58-64-0	C00008	2.06914e+06	2.11763e+06	1.40149e+06	1.8457e+06	1.25807e+06	1.10873e+06	1.41747e+06	1.62607e+06	1.45973e+06	ko00190,ko00195,ko00230,ko00908,ko01100,ko01110,ko01232,ko01240	C00008	-
Rn00864	dGMP	Nucleotides and derivatives	Nucleotides and derivatives	C10H14N5O7P	346.05	78.96	347.063	[M-H]-	3	902-04-5	-	1.16907e+06	1.2839e+06	1.11649e+06	1.05316e+06	897008	889543	626233	714476	710224	-	-	-
mws0248	Uridine	Nucleotides and derivatives	Nucleotides and derivatives	C9H12N2O6	243.06	110.02	244.07	[M-H]-	3	58-96-8	C00299	142054	150447	132466	82169.6	70459.6	75723.7	70578	78161.8	76999.8	ko00240,ko01100,ko01232,ko02010	C00299	-
mws1409	UDP-glucuronate	Nucleotides and derivatives	Nucleotides and derivatives	C15H22N2O18P2	579.03	403	580.034	[M-H]-	3	-	C00167	231897	181779	162889	197513	237730	257233	680359	739733	743901	ko00040,ko00053,ko00520,ko01100,ko01240,ko01250	C00167	-
pmb2922	UDP-glucose	Nucleotides and derivatives	Nucleotides and derivatives	C15H24N2O17P2	565.05	323.03	566.055	[M-H]-	1	133-89-1	C00029	2.00006e+07	2.00826e+07	2.00165e+07	1.63103e+07	1.69418e+07	1.58491e+07	2.37639e+07	2.66733e+07	2.28625e+07	ko00040,ko00052,ko00053,ko00500,ko00520,ko00524,ko00561,ko00908,ko01100,ko01110,ko01240,ko01250	C00029	-
mws0874	3'-AMP	Nucleotides and derivatives	Nucleotides and derivatives	C10H14N5O7P	346.06	211	347.063	[M-H]-	3	84-21-9	C01367	100802	99989.9	94952.7	71105.2	117428	90740.2	51033	74678.5	65621.6	ko00230,ko01100	C01367	-
Zmfn000481	UDP-D-xylose	Nucleotides and derivatives	Nucleotides and derivatives	C14H22N2O16P2	535.04	323.03	536.044	[M-H]-	2	3616-06-6	C00190	3.14168e+06	3.71906e+06	2.79884e+06	2.2918e+06	2.37992e+06	2.4327e+06	4.0159e+06	4.25234e+06	3.97903e+06	ko00520,ko00908,ko01100,ko01250	C00190	-
pme3188	UMP	Nucleotides and derivatives	Nucleotides and derivatives	C9H13N2O9P	323.03	211	324.036	[M-H]-	3	58-97-9	C00105	195981	247523	240479	208891	218292	131947	185470	173076	189658	ko00240,ko01100,ko01232,ko01240	C00105	-
mws0981	Isoxanthopterin	Nucleotides and derivatives	Nucleotides and derivatives	C6H5N5O2	178.04	136.02	179.044	[M-H]-	3	529-69-1	C03975	23174.3	21002.7	10307.5	27785.8	18495.2	29340.8	21858.7	18963.2	11288.6	-	C03975	-
pmb2507	2-Deoxy-D-ribose 1-phosphate*	Nucleotides and derivatives	Nucleotides and derivatives	C5H11O7P	213.02	96.97	214.024	[M-H]-	3	17210-42-3	C00672	165834	185536	127324	126822	147668	152016	254684	150670	267752	ko00030,ko00240,ko01100	C00672	-
MWS5083	FMN	Nucleotides and derivatives	Nucleotides and derivatives	C17H21N4O9P	455.1	96.97	456.105	[M-H]-	2	6184-17-4	C00061	1.53823e+06	1.84873e+06	1.6319e+06	2.41415e+06	2.06428e+06	1.90379e+06	824088	911969	1.28167e+06	ko00740,ko01100,ko01110,ko01240	C00061	-
Lmqn000780	UDP-N-acetyl-alpha-D-glucosamine	Nucleotides and derivatives	Nucleotides and derivatives	C17H27N3O17P2	606.08	384.98	607.082	[M-H]-	2	528-04-1	C00043	1.43005e+06	1.61823e+06	1.47375e+06	1.04849e+06	975764	940700	1.9402e+06	1.83644e+06	1.86245e+06	ko00520,ko00524,ko01100,ko01250	C00043	-
pme0257	Uracil	Nucleotides and derivatives	Nucleotides and derivatives	C4H4N2O2	111.02	67.03	112.027	[M-H]-	3	66-22-8	C00106	2.09512e+06	1.69376e+06	1.95656e+06	3.96277e+06	3.81645e+06	3.71985e+06	1.59594e+06	1.75044e+06	1.60355e+06	ko00240,ko00410,ko00770,ko01100,ko01232	C00106	-
MWSmce668	ATP	Nucleotides and derivatives	Nucleotides and derivatives	C10H16N5O13P3	505.99	158.93	506.996	[M-H]-	1	56-65-5	C00002	1.4606e+06	1.53166e+06	1.35566e+06	1.49235e+06	1.65657e+06	1.62162e+06	706250	801673	720263	ko00190,ko00195,ko00230,ko00908,ko01100,ko01110,ko01232,ko01240,ko04148	C00002	-
pme2651	NADP+	Nucleotides and derivatives	Nucleotides and derivatives	C21H28N7O17P3	742.07	620.02	743.076	[M-H]-	3	53-59-8	C00006	36877.9	25732.1	22186.9	3185.71	3185.71	3185.71	33325.5	24904	26999	ko00195,ko00480,ko00760,ko01100,ko01240	C00006	-
mws0884	3',5'-Cyclic AMP	Nucleotides and derivatives	Nucleotides and derivatives	C10H12N5O6P	328.05	134.05	329.053	[M-H]-	3	60-92-4	C00575	42134	3830.89	52934.1	11638.2	5294.87	54504.2	62045.8	5373.48	3785.06	ko00230,ko01100	C00575	-
mws0724	8-Hydroxyguanosine	Nucleotides and derivatives	Nucleotides and derivatives	C10H13N5O6	298.08	208.05	299.087	[M-H]-	3	3868-31-3	-	47195.8	43962.1	50985.2	44116.4	45944.8	29490.9	5898.18	5898.18	5898.18	-	-	-
mws0609	3',5'-Cyclic GMP	Nucleotides and derivatives	Nucleotides and derivatives	C10H12N5O7P	344.04	150.04	345.047	[M-H]-	3	7665-99-8	C00942	72219.4	53574.4	65436.1	34935.2	20051.2	49283.6	41582.4	42458.8	27411.3	ko00230,ko01100,ko04075	C00942	-
pme1373	dCMP	Nucleotides and derivatives	Nucleotides and derivatives	C9H14N3O7P	306.05	110.04	307.057	[M-H]-	3	1032-65-1	C00239	109963	153000	84576.7	132037	134693	128487	96181.8	123338	113618	ko00240,ko01100,ko01232	C00239	-
mws0668	Xanthosine	Nucleotides and derivatives	Nucleotides and derivatives	C10H12N4O6	283.07	151.03	284.076	[M-H]-	3	146-80-5	C01762	1175.05	1175.05	1175.05	1175.05	1175.05	1175.05	1.15433e+06	1.07764e+06	5875.25	ko00230,ko00232,ko01100,ko01110,ko01232,ko02010	C01762	-
pme0256	Xanthine	Nucleotides and derivatives	Nucleotides and derivatives	C5H4N4O2	151.03	108.02	152.033	[M-H]-	3	69-89-6	C00385	43664.2	44012.2	48523.9	57063.9	62281.4	56386.5	76377.4	58762.3	44952.4	ko00230,ko00232,ko01100,ko01110,ko01232	C00385	-
mws0976	Pseudouridine	Nucleotides and derivatives	Nucleotides and derivatives	C9H12N2O6	243.06	153.03	244.07	[M-H]-	3	1445-07-4	C02067	242284	340834	282176	526594	489795	424220	317387	384301	460797	ko00240,ko01100	C02067	-
mws1060	9-(Arabinosyl)hypoxanthine	Nucleotides and derivatives	Nucleotides and derivatives	C10H12N4O5	267.07	135.03	268.081	[M-H]-	3	7013-16-3	-	102344	233299	138219	102403	149056	132863	214579	428370	202874	-	-	-
Rn00817	dGTP	Nucleotides and derivatives	Nucleotides and derivatives	C10H16N5O13P3	505.99	408.01	506.996	[M-H]-	1	2564-35-4	-	877518	1.06118e+06	1.05559e+06	1.0257e+06	1.12529e+06	1.13251e+06	560602	570911	489057	-	-	-
mws0120	sn-Glycero-3-phosphocholine	Lipids	PC	C8H20NO6P	258.11	104.11	257.103	[M+H]+	1	28319-77-9	C00670	3.42745e+07	3.67706e+07	3.52627e+07	6.6754e+06	7.04221e+06	6.45923e+06	2.10369e+07	2.17246e+07	2.38352e+07	ko00564,ko00565	C00670	-
pmp001273	LysoPC 18:2	Lipids	LPC	C26H50NO7P	520.34	184.07	519.332	[M+H]+	2	-	-	1.90528e+07	2.24553e+07	2.40977e+07	1.38418e+07	1.61307e+07	1.61933e+07	1.06225e+07	1.22868e+07	1.18737e+07	-	-	-
Lmhp009890	LysoPC 20:3	Lipids	LPC	C28H52NO7P	546.36	184.07	545.348	[M+H]+	2	1199257-41-4	-	3.15965e+07	3.14909e+07	2.58337e+07	1.83204e+07	1.94468e+07	1.97041e+07	1.22573e+07	1.28783e+07	1.35107e+07	-	-	-
pmp001251	LysoPC 18:2(2n isomer)	Lipids	LPC	C26H50NO7P	520.34	184.07	519.332	[M+H]+	1	-	-	7.69942e+07	7.59778e+07	7.33397e+07	6.29201e+07	4.61945e+07	4.77519e+07	1.71561e+07	1.73356e+07	2.04235e+07	-	-	-
pmb0854	LysoPC 18:3	Lipids	LPC	C26H48NO7P	518.32	184.07	517.317	[M+H]+	2	-	-	2.50355e+07	3.39658e+07	3.28234e+07	9.86255e+06	1.45073e+07	1.54422e+07	1.69824e+07	1.42692e+07	1.7856e+07	-	-	-
pmd0160	LysoPE 16:0(2n isomer)	Lipids	LPE	C21H44NO7P	454.29	313.27	453.286	[M+H]+	3	-	-	2.66396e+06	3.54422e+06	3.24553e+06	1.29418e+06	1.02239e+06	2.15594e+06	3.15881e+06	3.23538e+06	2.34333e+06	-	-	-
Walp007043	2-Aminohexadecane-1,4-diol	Lipids	Sphingolipids	C16H35NO2	274.27	88.08	273.267	[M+H]+	1	-	-	7.70192e+06	8.3563e+06	8.26402e+06	8.30403e+06	7.13871e+06	6.74684e+06	7.31139e+06	7.26702e+06	7.55799e+06	-	-	-
Lmhp010515	LysoPC 17:0(2n isomer)*	Lipids	LPC	C25H52NO7P	510.36	184.07	509.348	[M+H]+	1	-	-	857615	688922	630547	630138	506739	648739	794740	670197	673591	-	-	-
Walp004752	2-Aminododecane-1,4-diol	Lipids	Sphingolipids	C12H27NO2	218.21	88.08	217.204	[M+H]+	1	-	-	599777	787027	693598	603906	655542	473104	677827	631332	469711	-	-	-
Waqkp05977	2-g-linolenoyl-glycerol	Lipids	Glycerol ester	C21H36O4	353.27	261.22	352.261	[M+H]+	2	-	-	5.58062e+06	5.27932e+06	5.4201e+06	4.31285e+06	4.05238e+06	3.65174e+06	1.0478e+06	856674	884885	-	-	-
Hasp010605	MG(18:3(9Z,12Z,15Z)/0:0/0:0)	Lipids	Glycerol ester	C21H36O4	353.27	261.22	352.261	[M+H]+	1	129828-41-7	-	7.61566e+06	8.11111e+06	1.00419e+07	5.34014e+06	4.1977e+06	4.58276e+06	919792	732950	883779	-	-	-
ML10195036	3-Dehydrosphinganine	Lipids	Sphingolipids	C18H37NO2	300.3	60.05	299.282	[M+H]+	3	16105-69-4	C02934	395491	243701	321712	641731	666247	544513	1.25342e+06	523367	658106	ko00600,ko01100	C02934	-
pmb2221	Phytosphingosine	Lipids	Sphingolipids	C18H39NO3	318.3	60.04	317.293	[M+H]+	2	554-62-1	C12144	7.02678e+06	5.9131e+06	5.81594e+06	7.29987e+06	8.53771e+06	6.42647e+06	6.98744e+06	7.75292e+06	7.08436e+06	ko00600,ko01100	C12144	-
pmd0147	LysoPC 20:2	Lipids	LPC	C28H54NO7P	548.37	184.07	547.364	[M+H]+	3	-	-	1.14301e+06	1.18966e+06	1.20265e+06	1.06717e+06	1.09697e+06	1.01334e+06	520124	626771	706849	-	-	-
mws0289	LysoPE 18:1*	Lipids	LPE	C23H46NO7P	480.31	339.29	479.301	[M+H]+	3	89576-29-4	-	410243	303599	455540	537341	294889	297783	254429	346873	211060	-	-	-
Wasyqp5995	2-Aminooctadecane-1,5,17-triol	Lipids	Sphingolipids	C18H39NO3	318.3	256.26	317.293	[M+H]+	1	-	-	131024	102978	103405	82458.9	113580	105980	124091	129435	124116	-	-	-
pmp001264	Hexadecylsphingosine	Lipids	Sphingolipids	C16H35NO2	274.27	256.27	273.267	[M+H]+	1	-	-	1.17188e+07	1.22085e+07	1.17609e+07	1.3094e+07	1.12228e+07	1.05731e+07	1.16218e+07	1.12677e+07	1.24631e+07	-	-	-
Lmhp010190	LysoPC 18:1(2n isomer)	Lipids	LPC	C26H52NO7P	522.36	184.07	521.348	[M+H]+	1	-	-	1.31936e+07	1.55568e+07	1.35138e+07	8.18082e+06	8.24003e+06	8.52803e+06	4.75217e+06	5.69652e+06	6.13776e+06	-	-	-
WaYp007548	2-Aminotetradecan-1-ol	Lipids	Sphingolipids	C14H31NO	230.25	62.06	229.241	[M+H]+	1	-	-	98616.6	101529	81738.1	91483.6	88958.3	58560.3	82526.4	94331.1	89228.2	-	-	-
pmc0960	LysoPC 20:4	Lipids	LPC	C28H50NO7P	544.34	184.07	543.332	[M+H]+	3	-	-	7.60322e+06	1.00117e+07	6.85665e+06	2.66508e+06	2.72353e+06	2.69436e+06	6.29444e+06	6.10008e+06	7.2211e+06	-	-	-
pma1303	LysoPC 16:2*	Lipids	LPC	C24H46NO7P	492.31	184.07	491.301	[M+H]+	3	-	-	141301	145197	110642	69997.9	119026	76729	446466	327979	424761	-	-	-
pmb0855	LysoPC 16:0	Lipids	LPC	C24H50NO7P	496.34	184.07	495.332	[M+H]+	2	17364-16-8	-	6.29636e+07	6.05452e+07	6.09825e+07	4.5493e+07	5.33847e+07	5.14318e+07	5.45345e+07	5.44347e+07	5.98239e+07	-	-	-
MEDN0669	5-KETE	Lipids	Free fatty acids	C20H30O3	319.23	273.23	318.219	[M+H]+	3	126432-17-5	C14732	2.95106e+07	2.14716e+07	2.82114e+07	2.40803e+07	2.55289e+07	2.40025e+07	3.60129e+07	3.67974e+07	2.67752e+07	ko00590,ko01100	C14732	-
pmp001270	LysoPC 16:1*	Lipids	LPC	C24H48NO7P	494.32	184.07	493.317	[M+H]+	1	76790-27-7	-	2.16507e+06	2.48143e+06	2.4097e+06	2.14627e+06	2.27177e+06	2.2124e+06	2.80813e+06	2.32008e+06	2.4617e+06	-	-	-
WaYp006462	2-Aminohexadecane-1,5,15-triol	Lipids	Sphingolipids	C16H35NO3	290.27	228.23	289.262	[M+H]+	1	-	-	1.41367e+06	1.40687e+06	1.42721e+06	1.54191e+06	1.34513e+06	1.36054e+06	1.35224e+06	1.29123e+06	1.47317e+06	-	-	-
pmb0876	LysoPE 16:0	Lipids	LPE	C21H44NO7P	454.29	313.27	453.286	[M+H]+	2	53862-35-4	-	4.01925e+06	3.05362e+06	4.27856e+06	1.45698e+06	1.36451e+06	1.85516e+06	2.83558e+06	1.41331e+06	1.9708e+06	-	-	-
MW0168670	9,12-Octadecadiynoic Acid	Lipids	Free fatty acids	C18H28O2	299.2	145.1	276.209	[M+Na]+	3	2012-14-8	-	4.00279e+07	3.59512e+07	4.19573e+07	3.25564e+07	3.48016e+07	3.52603e+07	2.39933e+07	2.78471e+07	2.86678e+07	-	-	-
Hmqp005411	9-Oxo-12Z-Octadecenoic acid*	Lipids	Free fatty acids	C18H32O3	297.24	81.07	296.235	[M+H]+	3	112543-32-5	-	241488	287952	314652	211403	235397	216202	248678	297417	247436	-	-	-
Lmhp008833	LysoPC 16:1(2n isomer)*	Lipids	LPC	C24H48NO7P	494.32	184.07	493.317	[M+H]+	1	-	-	1.01496e+06	1.03252e+06	966141	653712	628423	862619	547149	523172	580505	-	-	-
Lcsp013328	linoleoyl ethanolamine	Lipids	LPE	C20H37NO2	324.29	62.06	323.282	[M+H]+	2	68171-52-8	-	757884	423586	624371	786940	810790	916830	1.00047e+06	1.19659e+06	864924	-	-	-
pmf0395	(9Z)-Octadecenoic acid	Lipids	Free fatty acids	C18H34O2	283.26	121.1	282.256	[M+H]+	3	112-80-1	C00712	281885	294772	298677	309509	294775	342895	303019	298642	341611	ko00061,ko00073,ko01040	C00712	-
Lmhp008801	LysoPE 18:3	Lipids	LPE	C23H42NO7P	476.28	335.26	475.27	[M+H]+	2	-	-	976376	1.06363e+06	1.336e+06	284364	414375	283313	699594	992578	713425	-	-	-
Hmqp005455	15(R)-Hydroxylinoleic Acid*	Lipids	Free fatty acids	C18H32O3	297.24	81.07	296.235	[M+H]+	3	177931-23-6	-	253328	266648	329532	192064	240761	359083	248242	214010	275159	-	-	-
Sazp010264	Monogalactosyldiacylglycerol	Lipids	Glycerol ester	C45H70O10	771.5	609.45	770.497	[M+H]+	1	-	-	188939	181623	185280	139651	151896	244319	96371.2	76943.8	63184.4	-	-	-
MW0014651	5,8,11-Eicosatriynoic Acid	Lipids	Free fatty acids	C20H28O2	301.22	255.22	300.209	[M+H]+	3	13488-22-7	-	1.56822e+07	1.93157e+07	1.72073e+07	2.17402e+07	1.44223e+07	1.74988e+07	1.70359e+07	1.80153e+07	2.4997e+07	-	-	-
Wahlp08069	LysoPC 17:2(2n isomer)*	Lipids	LPC	C25H48NO7P	506.32	184.07	505.317	[M+H]+	3	-	-	233561	339007	251228	159647	174100	118439	51691.6	77130	73159	-	-	-
Safp022031	Gorlic acid*	Lipids	Free fatty acids	C18H30O2	279.23	81.07	278.225	[M+H]+	2	-	-	2.39516e+06	2.26492e+06	2.82159e+06	4.6887e+06	4.61758e+06	4.80484e+06	1.8711e+06	1.91184e+06	1.90225e+06	-	-	-
Wcdp009119	Octadeca-9,12,15-trienoic acid*	Lipids	Free fatty acids	C18H30O2	279.23	81.07	278.225	[M+H]+	2	28290-79-1	-	2.39516e+06	2.26492e+06	2.82159e+06	4.6887e+06	4.61758e+06	4.80484e+06	1.8711e+06	1.91184e+06	1.90225e+06	-	-	-
Wasyqp6350	Dehydrophytosphingosine	Lipids	Sphingolipids	C18H37NO3	316.29	60.04	315.277	[M+H]+	1	-	-	1.10973e+07	9.48382e+06	9.84063e+06	1.02967e+07	1.37794e+07	1.07983e+07	1.33953e+07	1.42836e+07	1.60946e+07	-	-	-
pmb0889	Punicic acid	Lipids	Free fatty acids	C18H30O2	279.23	95.09	278.225	[M+H]+	3	544-72-9	C08364	1.46353e+06	1.85188e+06	2.16249e+06	4.00476e+06	3.89885e+06	3.57231e+06	1.34679e+06	1.32597e+06	1.65942e+06	-	C08364	-
Wcdp010432	Linoleamide	Lipids	Free fatty acids	C18H33NO	280.26	245.23	279.256	[M+H]+	1	3999-01-7	-	37918	31089.2	56431.8	30403.5	28331.5	92932.9	63013	143020	35928.3	-	-	-
Hmqp006235	LysoPC 18:4	Lipids	LPC	C26H46NO7P	516.3	184.07	515.301	[M+H]+	3	-	-	3.50039e+06	3.52241e+06	4.02266e+06	756854	871689	730360	573433	559818	534393	-	-	-
Lmhp007840	LysoPC 19:2	Lipids	LPC	C27H52NO7P	534.36	184.07	533.348	[M+H]+	3	-	-	1.32265e+06	1.2436e+06	1.2345e+06	452000	564356	607309	324115	328682	592282	-	-	-
Walbp06501	C16 phytosphingosine	Lipids	Sphingolipids	C16H35NO3	290.27	242.25	289.262	[M+H]+	1	-	-	411747	384664	412332	460746	420299	414411	477966	366136	373947	-	-	-
pmb0865	LysoPC 18:3(2n isomer)	Lipids	LPC	C26H48NO7P	518.32	184.07	517.317	[M+H]+	1	-	-	6.69994e+07	9.00684e+07	7.41562e+07	3.62471e+07	4.81342e+07	3.73171e+07	2.12034e+07	2.0156e+07	2.20114e+07	-	-	-
Walp007738	14-Amino-15-hydroxy-11-methylpentadecanoic acid	Lipids	Sphingolipids	C16H33NO3	288.25	88.08	287.246	[M+H]+	3	-	-	65954	73736.3	83087.1	64267.1	55282.6	70428.7	73602.7	71670.2	67668.2	-	-	-
Lmhp008718	LysoPC 17:2*	Lipids	LPC	C25H48NO7P	506.32	184.07	505.317	[M+H]+	3	-	-	261626	289477	276689	155939	131776	161540	89546.8	76481.4	85045.4	-	-	-
pmb0862	LysoPC 12:0	Lipids	LPC	C20H42NO7P	440.28	184.07	439.27	[M+H]+	3	20559-18-6	-	265948	322981	221336	86379.4	143046	118003	219368	149994	233969	-	-	-
Lmwp102712	5Z,8Z-tetradecadienoic acid	Lipids	Free fatty acids	C14H24O2	225.19	67.06	224.178	[M+H]+	2	39039-37-7	-	153648	94057.9	107149	134266	210889	153761	126847	248585	199795	-	-	-
Walp004906	2-Aminotetradecane-1,11,13-triol	Lipids	Sphingolipids	C14H31NO3	262.24	88.08	261.23	[M+H]+	1	-	-	191131	179337	186888	193390	95615.6	141520	185967	95271.1	257213	-	-	-
WaYp005128	2-Aminotetradecane-1,5,13-triol	Lipids	Sphingolipids	C14H31NO3	262.24	200.2	261.23	[M+H]+	1	-	-	1.99582e+06	1.96434e+06	1.6577e+06	1.99763e+06	1.64503e+06	2.02767e+06	1.96539e+06	2.0262e+06	1.73325e+06	-	-	-
Lmhp009497	LysoPE 20:4*	Lipids	LPE	C25H44NO7P	502.29	361.27	501.286	[M+H]+	2	-	-	275379	65284.8	331982	23803.5	45842	56428.1	345071	128011	262600	-	-	-
Lmhp010040	LysoPE 20:3*	Lipids	LPE	C25H46NO7P	504.31	363.29	503.301	[M+H]+	2	-	-	527060	631037	374312	581582	470164	410592	193963	348475	412835	-	-	-
pma0461	14,15-Dehydrocrepenynic acid	Lipids	Free fatty acids	C18H28O2	277.22	93.07	276.209	[M+H]+	3	4154-44-3	-	4.30998e+06	3.47188e+06	4.84703e+06	5.69077e+06	5.08097e+06	5.77356e+06	1.07476e+06	974610	1.02965e+06	-	-	-
pmb0881	LysoPE 18:2	Lipids	LPE	C23H44NO7P	478.29	337.27	477.286	[M+H]+	2	-	-	2.15424e+06	1.37534e+06	2.17016e+06	470681	504557	719234	832659	367344	1.02509e+06	-	-	-
MWSmce539	Dibutyl sebacate	Lipids	Free fatty acids	C18H34O4	315.25	185.12	314.246	[M+H]+	3	109-43-3	-	313679	117241	200992	294802	281732	243250	106379	87873.7	132472	-	-	-
Lmhp009349	LysoPE 20:4(2n isomer)*	Lipids	LPE	C25H44NO7P	502.29	361.27	501.286	[M+H]+	2	-	-	83762.8	72468.5	78506.8	55059.9	113545	28841.1	139727	320452	99236.4	-	-	-
pmb1574	9,12-Octadecadien-6-Ynoic Acid	Lipids	Free fatty acids	C18H28O2	277.22	93.07	276.209	[M+H]+	3	61481-29-6	-	403453	360833	382109	402672	476782	455878	594181	404516	379767	-	-	-
Sasp007401	2-Aminohexadecanoic acid	Lipids	Free fatty acids	C16H33NO2	272.26	254.25	271.251	[M+H]+	2	7769-79-1	-	295527	192940	249346	483262	391284	416103	570418	358629	446638	-	-	-
pmb1650	Octadeca-11E,13E,15Z-trienoic acid	Lipids	Free fatty acids	C18H30O2	279.23	149.13	278.225	[M+H]+	3	25575-00-2	-	397544	479368	554252	253419	308885	278069	322086	416238	225774	-	-	-
Lmhp007598	LysoPC 19:2(2n isomer)	Lipids	LPC	C27H52NO7P	534.36	184.07	533.348	[M+H]+	3	-	-	1.18904e+06	1.37851e+06	1.33549e+06	531969	518196	505136	335617	357598	492407	-	-	-
Lmhp008589	LysoPE 18:3(2n isomer)	Lipids	LPE	C23H42NO7P	476.28	335.26	475.27	[M+H]+	1	-	-	511460	509411	326560	167613	99550.6	179431	689173	993245	934401	-	-	-
Lmhp011388	2-α-Linolenoyl-glycerol*	Lipids	Glycerol ester	C21H36O4	353.27	261.22	352.261	[M+H]+	3	55268-58-1	-	225175	178588	280628	346117	307848	284729	529299	416323	320197	-	-	-
Wcdp010162	1-Monolinolenoyl-Rac-Glycerol*	Lipids	Glycerol ester	C21H36O4	353.27	261.22	352.261	[M+H]+	3	18465-99-1	-	225175	178588	280628	346117	307848	284729	529299	416323	320197	-	-	-
Lmhp011562	1-α-Linolenoyl-glycerol*	Lipids	Glycerol ester	C21H36O4	353.27	261.22	352.261	[M+H]+	3	-	-	257103	213472	217849	181474	275984	291466	595420	699957	455213	-	-	-
Lmhp009802	LysoPE 20:3(2n isomer)*	Lipids	LPE	C25H46NO7P	504.31	363.29	503.301	[M+H]+	2	-	-	768612	1.10725e+06	92020.1	173614	269888	663776	249591	648574	423589	-	-	-
MW0011974	10S,17S-dihydroxy-4Z,7Z,11E,13Z,15E,19Z-docosahexaenoic acid	Lipids	Free fatty acids	C22H32O4	383.22	195.12	360.23	[M+Na]+	3	871826-47-0	-	284738	247633	184868	956592	853577	728726	756552	996180	818484	-	-	-
Lmfp009701	Glycerol 9,11,13-octadecatrienoyl ester*	Lipids	Glycerol ester	C21H36O4	353.27	261.22	352.261	[M+H]+	3	-	-	308318	211720	190992	254408	218545	261389	366328	652235	393344	-	-	-
Lmhp009590	LysoPC 17:1	Lipids	LPC	C25H50NO7P	508.34	184.07	507.332	[M+H]+	3	-	-	143796	129902	191696	107607	122650	138046	75623.4	31051	38456.3	-	-	-
Lmxp006440	2-Palmitoylglycerol	Lipids	Glycerol ester	C19H38O4	331.28	313.27	330.277	[M+H]+	3	23470-00-0	-	13602.7	13602.7	13602.7	217975	198728	171948	92962.1	124202	103476	-	-	-
pmp001281	LysoPC 18:1	Lipids	LPC	C26H52NO7P	522.36	184.07	521.348	[M+H]+	2	-	-	1.17261e+06	5.94177e+06	2.48015e+06	8.06789e+06	3.52873e+06	6.07446e+06	3.82117e+06	3.52086e+06	4.14167e+06	-	-	-
Safp009309	N-hexanoylsphinganine	Lipids	Free fatty acids	C24H49NO3	400.38	338.34	399.371	[M+H]+	1	-	-	5344.36	5344.36	5344.36	26721.8	28854.2	41238.9	36747.7	43819.7	29265.8	-	-	-
Lmhp008924	LysoPC 19:3	Lipids	LPC	C27H50NO7P	532.34	184.07	531.332	[M+H]+	3	-	-	176847	46078.9	65028.5	44293	49547	87394.2	40476.9	22623.9	10952.3	-	-	-
Lmhp009368	LysoPC 22:6	Lipids	LPC	C30H50NO7P	568.34	184.07	567.332	[M+H]+	3	-	-	116407	99033.2	70424.2	63717.7	50642.4	78129.6	24336.3	28467.3	33479.1	-	-	-
MEDP1341	1-(9Z,12Z-octadecadienoyl)-sn-glycero-3-phosphocholine	Lipids	LPC	C26H50NO7P	520.34	184.08	519.332	[M+H]+	3	22252-07-9	-	2.65403e+06	2.25529e+06	2.48115e+06	1.20332e+06	1.07495e+06	1.30763e+06	674383	666666	548603	-	-	-
Lmhp010162	LysoPE 17:0	Lipids	LPE	C22H46NO7P	468.31	327.29	467.301	[M+H]+	3	-	-	160102	161468	90662	26602	34382.3	83237.6	80251	115006	46948.6	-	-	-
Lmsp010763	Monolinolenin*	Lipids	Glycerol ester	C21H36O4	353.27	261.22	352.261	[M+H]+	3	75685-85-7	-	233699	369731	115107	333117	311255	362741	360763	620609	429176	-	-	-
pmb2260	LysoPC 15:1	Lipids	LPC	C23H46NO7P	480.31	184.07	479.301	[M+H]+	3	-	-	70281.8	105056	107639	64030.4	36051.9	74067.1	83562.4	80548.5	100970	-	-	-
pmb0856	LysoPE 18:1(2n isomer)*	Lipids	LPE	C23H46NO7P	480.31	339.29	479.301	[M+H]+	3	-	-	474352	164236	306645	215740	171555	268523	238229	279386	217917	-	-	-
pmb2406	LysoPC 17:0*	Lipids	LPC	C25H52NO7P	510.36	184.07	509.348	[M+H]+	1	50930-23-9	-	736363	494020	665892	40523	40523	40523	202615	677599	564267	-	-	-
Lcfp121148	2-aminohexadec-4-ene-1,3-diol	Lipids	Sphingolipids	C16H33NO2	272.26	254.25	271.251	[M+H]+	1	-	-	517742	712998	825590	420653	514571	560987	665557	540281	497308	-	-	-
Zken00392	1-(9Z-octadecenoyl)-sn-glycero-3-phosphocholine	Lipids	LPC	C26H52NO7P	544.34	485.26	521.348	[M+Na]+	3	-	-	567378	551360	795383	296049	415898	418099	309427	198447	398420	-	-	-
pmd0130	LysoPC 14:0	Lipids	LPC	C22H46NO7P	468.31	184.07	467.301	[M+H]+	2	20559-16-4	-	61998	58089.1	61499.4	57781.4	54854.5	41414.3	8282.85	8282.85	8282.85	-	-	-
Waqkp05282	1-g-linolenoyl-glycerol	Lipids	Glycerol ester	C21H36O4	353.27	261.22	352.261	[M+H]+	2	-	-	181432	153629	164900	154746	201127	178379	90128.3	29759.7	109840	-	-	-
pmb0864	LysoPE 14:0	Lipids	LPE	C19H40NO7P	426.26	285.24	425.254	[M+H]+	3	-	-	10558.2	5712.67	10952.3	1142.53	1142.53	1142.53	19835.7	26993.7	6081.15	-	-	-
pmb0296	1-Oleoyl-Sn-Glycerol	Lipids	Glycerol ester	C21H40O4	357.3	265.25	356.293	[M+H]+	3	129784-87-8	-	1642.72	1642.72	1642.72	44015.7	30664.2	8213.59	1642.72	1642.72	1642.72	-	-	-
Lmhp010514	LysoPE 20:2(2n isomer)	Lipids	LPE	C25H48NO7P	506.32	365.31	505.317	[M+H]+	3	-	-	81005.4	46723.9	27545.1	31318.3	74149	45593.3	11775.2	37704.5	32927.2	-	-	-
Hmcp004650	Hexadecanedioate	Lipids	Free fatty acids	C16H30O4	287.22	269.21	286.214	[M+H]+	3	505-54-4	C19615	2.6703e+07	2.82447e+07	3.06242e+07	6.08951e+07	5.703e+07	5.63068e+07	3.50953e+07	3.34975e+07	3.18808e+07	ko00073,ko01100	C19615	-
Lmhp008233	LysoPE 18:4	Lipids	LPE	C23H40NO7P	474.26	333.24	473.254	[M+H]+	3	-	-	23293.5	67008.8	43694.9	1123.29	1123.29	1123.29	14430.3	12632.2	16448	-	-	-
Lmhp010757	LysoPE 20:2	Lipids	LPE	C25H48NO7P	506.32	365.31	505.317	[M+H]+	3	-	-	2308.37	2308.37	2308.37	32685.4	43475.4	48867.4	11541.9	32661.8	64584.4	-	-	-
pmb1562	1-Stearidonoyl-Glycerol	Lipids	Glycerol ester	C21H34O4	351.25	147.12	350.246	[M+H]+	3	-	-	5774.51	5774.51	5774.51	5774.51	5774.51	5774.51	132090	54776.6	28872.6	-	-	-
pmb0863	LysoPC 16:2(2n isomer)*	Lipids	LPC	C24H46NO7P	492.31	184.07	491.301	[M+H]+	3	-	-	71466.7	96453.8	89743.7	45479	29143.8	36183.3	84949.2	70840.5	99601	-	-	-
Lmhp007836	LysoPE 16:3	Lipids	LPE	C21H38NO7P	448.25	307.23	447.239	[M+H]+	3	-	-	81973.1	106792	140332	81681.1	120117	112864	60938.4	84320.3	73185	-	-	-
mws1349	Sphinganine	Lipids	Sphingolipids	C18H39NO2	302.31	109.1	301.298	[M+H]+	3	764-22-7	C00836	4.78269e+06	4.13331e+06	4.19857e+06	6.58076e+06	5.50291e+06	5.19286e+06	3.35333e+06	3.81546e+06	2.89124e+06	ko00600,ko01100	C00836	-
Walbp07873	12-Oxo phytodienoic acid	Lipids	Free fatty acids	C18H28O3	293.21	81.07	292.204	[M+H]+	1	67204-66-4	-	1.22877e+06	1.37134e+06	1.49697e+06	424538	453916	353700	237216	299911	213039	-	-	-
Waqkp06484	1-Linolenoylglycerol	Lipids	Glycerol ester	C21H36O4	353.27	261.22	352.261	[M+H]+	1	-	-	571884	526197	555051	348230	377850	415086	116249	136037	105784	-	-	-
pmd0146	LysoPC 20:2(2n isomer)	Lipids	LPC	C28H54NO7P	548.37	184.07	547.364	[M+H]+	3	-	-	1.07822e+06	795614	842861	550632	590540	455516	220662	215968	261734	-	-	-
Hmlp005911	Soyacerebroside I	Lipids	Sphingolipids	C40H75NO9	714.54	696.55	713.544	[M+H]+	3	114297-20-0	-	117342	118945	69423.3	145724	119546	103215	100639	109357	162575	-	-	-
Wcdp007388	10,14,16-Octadecatrien-12-Ynoic Acid	Lipids	Free fatty acids	C18H26O2	275.2	133.1	274.193	[M+H]+	2	-	-	28498.6	28498.6	28498.6	333641	332809	691258	28498.6	28498.6	28498.6	-	-	-
MW0140180	18-HEPE	Lipids	Free fatty acids	C20H30O3	319.23	255.22	318.219	[M+H]+	3	141110-17-0	-	1.02207e+07	9.97558e+06	1.35803e+07	4.09381e+06	8.64597e+06	8.52483e+06	2.50569e+06	6.36621e+06	1.2426e+06	-	-	-
Lmhp010908	LysoPC 19:1	Lipids	LPC	C27H54NO7P	536.37	184.07	535.364	[M+H]+	3	-	-	98648.6	92525.8	21640.4	4328.08	4328.08	4328.08	4328.08	4328.08	4328.08	-	-	-
pmd0136	LysoPC 18:0(2n isomer)	Lipids	LPC	C26H54NO7P	524.37	184.07	523.364	[M+H]+	1	-	-	10097.6	10097.6	10097.6	310004	337827	503588	10097.6	10097.6	10097.6	-	-	-
mws0397	(5Z,8Z,11Z,14Z,17Z)-Icosapentaenoic acid	Lipids	Free fatty acids	C20H30O2	301.22	257.23	302.225	[M-H]-	2	10417-94-4	C06428	6.43306e+06	5.84899e+06	6.33862e+06	6.88465e+06	6.37905e+06	6.57606e+06	6.51464e+06	6.34734e+06	6.53996e+06	ko01040	C06428	-
pme2827	Hexadecanal	Lipids	Free fatty acids	C16H32O	239.24	223.24	240.245	[M-H]-	3	629-80-1	C00517	1.59024e+07	1.62018e+07	1.63932e+07	1.60655e+07	1.59536e+07	1.59127e+07	1.7675e+07	1.95567e+07	1.81806e+07	ko00071	C00517	-
Waptn06085	DGMG 18:3(2n isomer)	Lipids	Glycerol ester	C33H56O14	735.38	397.13	676.367	[M+CH3COO]-	1	-	-	143681	240965	230935	79853.1	160612	130234	40635.1	43248.1	25952.2	-	-	-
pmn001689	9-Hydroxy-12-oxo-15(Z)-octadecenoic acid	Lipids	Free fatty acids	C18H32O4	311.22	223.17	312.23	[M-H]-	3	-	C21924	72577.3	56925.8	79343.9	72693.5	63583.9	49824.6	49998.8	43978.9	40719.7	ko00592,ko01110	C21924	-
Waln010743	1-(2,3-dihydroxypropoxy)-3-(((2-(dimethylamino)ethoxy)(hydroxy)phosphoryl)oxy)propan-2-yl (11Z,14Z)-octadeca-11,14-dienoate	Lipids	LPE	C28H54NO9P	578.35	279.23	579.354	[M-H]-	1	-	-	41169.8	57391.7	63417.7	41473	56696.4	53013.7	16330.6	24647.6	15608.2	-	-	-
MWS20022	15S-Hydroxy-8,11,13-eicosatrienoic acid	Lipids	Free fatty acids	C20H34O3	321.25	221.16	322.251	[M-H]-	1	92693-02-2	-	276414	283276	321415	1.43417e+06	1.48795e+06	1.46974e+06	370408	366802	369160	-	-	-
Lmbn006210	Dihomo-gamma-linolenate	Lipids	Free fatty acids	C20H34O2	305.25	59.01	306.256	[M-H]-	1	1783-84-2	C03242	71821.6	54980.1	55246.1	115826	121802	102587	122365	126440	122220	ko00591,ko01040,ko01100	C03242	-
MWSprf135	(15Z)-Tetracosenoic acid	Lipids	Free fatty acids	C24H46O2	365.34	283.26	366.35	[M-H]-	3	506-37-6	C08323	41931	47570.1	31094.5	41585.4	32981.1	43039.3	37072.2	35061.9	44773.7	ko01040	C08323	-
Lmbn005287	(7S,8S)-DiHODE	Lipids	Free fatty acids	C18H32O4	311.22	249.22	312.23	[M-H]-	2	143288-65-7	C07354	122652	119305	107192	339094	349311	303035	141636	135661	153369	ko00591	C07354	-
Sasn009320	2-decyl-3-hydroxypentanedioic acid	Lipids	Free fatty acids	C15H28O5	287.19	225.19	288.194	[M-H]-	1	-	-	20836.8	29912.6	25251.7	70275.5	57210	78294.2	41842.2	54244.7	55835.5	-	-	-
Wahsn11969	1-O-p-Coumaroyl Dodecanediol	Lipids	Free fatty acids	C21H32O4	347.22	145.03	348.23	[M-H]-	1	-	-	8.4745e+06	8.98677e+06	8.23986e+06	3.22897e+06	3.12311e+06	3.14108e+06	1.32138e+07	1.31e+07	1.33506e+07	-	-	-
MWS2430	13-methylmyristic acid	Lipids	Free fatty acids	C15H30O2	241.22	241.21	242.225	[M-H]-	3	2485-71-4	-	138836	126546	111728	124121	120930	99983.6	174510	172579	181756	-	-	-
pmn001694	9,10,13-Trihydroxy-11-Octadecenoic Acid	Lipids	Free fatty acids	C18H34O5	329.23	229.15	330.241	[M-H]-	2	29907-57-1	C14835	815731	706272	753020	2.84644e+06	2.90268e+06	2.891e+06	1.02813e+06	1.02831e+06	990801	ko00591	C14835	-
MWSslk133	1,14-Tetradecanedioic Acid	Lipids	Free fatty acids	C14H26O4	257.18	195.18	258.183	[M-H]-	2	821-38-5	-	584616	468230	694419	1.75431e+06	1.63355e+06	1.69237e+06	882297	945880	942012	-	-	-
Wagn011658	1-Palmitoyl-Sn-Glycerol 3-O-Diglucoside	Lipids	Glycerol ester	C31H58O14	653.38	397.14	654.383	[M-H]-	3	-	-	133802	104633	107142	88851.5	105378	130686	34957.5	34942.4	29350	-	-	-
Zbfn007626	1-Linoleoyl-2-Lysophosphatidic Acid Monobutylamine Ester	Lipids	Glycerol ester	C25H48NO7P	504.31	279.23	505.317	[M-H]-	3	-	-	6.50605e+06	7.05376e+06	6.55706e+06	4.45146e+06	4.50562e+06	4.47504e+06	2.26844e+06	2.43577e+06	2.27892e+06	-	-	-
Wahsn13988	1-O-Homovanilloyl nonadecadienoic acid	Lipids	Free fatty acids	C28H42O5	457.3	181.05	458.303	[M-H]-	1	-	-	984472	806125	896327	667016	684333	713383	670548	696437	696859	-	-	-
pmf0297	1-Eicosanol	Lipids	Free fatty acids	C20H42O	297.32	183.21	298.324	[M-H]-	3	629-96-9	-	935185	785135	912055	710330	728875	718931	862621	957707	912714	-	-	-
Rfmb091	9S-Hydroxy-10E,12Z-octadecadienoic acid*	Lipids	Free fatty acids	C18H32O3	295.23	195.14	296.235	[M-H]-	2	15514-85-9	C14767	955429	929039	979507	2.24734e+06	2.25202e+06	2.26355e+06	839932	872394	891523	ko00591	C14767	-
Safn011825	(10E,12Z,15Z)-9-oxooctadeca-10,12,15-trienoic acid	Lipids	Free fatty acids	C18H28O3	291.2	185.12	292.204	[M-H]-	3	125559-74-2	-	56370.5	55401.9	52326.1	42121.6	39422.4	46726.4	29858.4	30821.1	34651.3	-	-	-
mws0237	Azelaic acid	Lipids	Free fatty acids	C9H16O4	187.1	125.1	188.105	[M-H]-	3	123-99-9	C08261	1.38606e+06	1.13846e+06	1.45465e+06	1.42542e+06	1.39603e+06	1.40554e+06	1.02048e+06	1.16688e+06	1.14958e+06	-	C08261	-
MWS80006	9-Hydroperoxy-9Z,11E-Octadecadienoic Acid	Lipids	Free fatty acids	C18H32O4	311.22	293.21	312.23	[M-H]-	2	-	-	63657.4	63412.4	58905	222651	185828	160563	93478.5	85209.9	94976.6	-	-	-
pmb2640	Dodecanoic acid	Lipids	Free fatty acids	C12H24O2	199.17	199.17	200.178	[M-H]-	2	143-07-7	C02679	2.27206e+06	2.23987e+06	2.37984e+06	1.23907e+06	1.27605e+06	1.29381e+06	1.56304e+06	1.56222e+06	1.5224e+06	ko00061,ko01100,ko01110	C02679	-
Lmyn005812	Gingerglycolipid A	Lipids	Glycerol ester	C33H56O14	675.36	397.14	676.367	[M-H]-	2	145937-22-0	-	1.66511e+06	1.78805e+06	1.28296e+06	464748	1.0678e+06	556540	275639	230115	232691	-	-	-
MWS1900	Undecanedioic acid	Lipids	Free fatty acids	C11H20O4	215.13	153.13	216.136	[M-H]-	3	1852-04-6	-	160826	94761.2	232213	189852	198163	198826	102922	130810	131619	-	-	-
Wahsn10570	1-O-Feruloyl 9,10,12,13-tetrahydroxynonadecanoic acid	Lipids	Free fatty acids	C29H46O9	537.31	193.05	538.314	[M-H]-	1	-	-	4.72831e+06	5.14162e+06	4.84517e+06	8.92289e+06	8.87797e+06	8.65849e+06	1.10167e+07	1.09498e+07	1.11255e+07	-	-	-
Wahsn13149	3-O-p-Coumaroyl 2,3-dihydroxypropyl-2-Hydroxyhexadecanoate	Lipids	Free fatty acids	C28H44O7	491.3	145.03	492.309	[M-H]-	1	-	-	150777	148875	167465	578058	605001	628262	112005	91212.9	145177	-	-	-
Wafn015217	Hydroxyicosanoic Acid	Lipids	Free fatty acids	C20H40O3	327.29	59.01	328.298	[M-H]-	3	-	-	16602.4	13308.9	11809	23482.8	23885.8	21303.9	4658.81	6948.98	9518.9	-	-	-
Lmqn008288	3-Hydroxyoctadecanoic Acid	Lipids	Free fatty acids	C18H36O3	299.26	299.26	300.266	[M-H]-	3	45261-96-9	-	2.01107e+08	1.7101e+08	1.74316e+08	2.16295e+08	2.08177e+08	1.98271e+08	2.38719e+08	2.34585e+08	2.33871e+08	-	-	-
Wahsn11433	1-O-p-Coumaroyl 12-Hydroxydodecanoic acid	Lipids	Free fatty acids	C21H30O5	361.2	145.03	362.209	[M-H]-	1	-	-	6.69726e+06	7.51003e+06	7.15732e+06	7.54119e+06	7.23348e+06	7.6067e+06	7.28056e+06	6.97809e+06	7.42115e+06	-	-	-
mws5045	12-Hydroxydodecanoic acid	Lipids	Free fatty acids	C12H24O3	215.17	169.16	216.173	[M-H]-	3	505-95-3	C08317	68572.3	69563.5	56696.5	89287.3	102559	86676	95709.2	94383.3	87156.2	-	C08317	-
Lmbn005443	13-KODE; (9Z,11E)-13-Oxooctadeca-9,11-dienoic acid*	Lipids	Free fatty acids	C18H30O3	293.21	235.17	294.219	[M-H]-	3	54739-30-9	C14765	51167.1	50378.8	47320.6	85475.6	67508.1	75206.2	66789.7	64954.1	64117.6	ko00591	C14765	-
Wahsn13323	1-O-Feruloyl 2,3-dihydroxypropyl 16-hydroxyhexadecanoate	Lipids	Free fatty acids	C29H46O8	521.31	175.04	522.319	[M-H]-	3	-	-	21603.2	22905.9	19356.1	85508.9	81930.7	88327.2	66281.7	63446.8	73010.8	-	-	-
Zmyn005384	(R)-2-Hydroxystearate	Lipids	Free fatty acids	C18H36O3	299.26	253.26	300.266	[M-H]-	2	26633-48-7	C03042	432656	457916	505542	407902	408966	393938	335241	359209	341312	-	C03042	-
Zmyn004732	2R-hydroxy-9Z,12Z,15Z-octadecatrienoic acid	Lipids	Free fatty acids	C18H30O3	293.21	185.12	294.219	[M-H]-	3	-	C16342	55246.2	49338.6	60214.1	81689.6	95539.1	111653	86681.2	81728.7	76158.7	ko00592	C16342	-
pmb2786	9-Hydroxy-10,12,15-octadecatrienoic acid*	Lipids	Free fatty acids	C18H30O3	293.21	235.17	294.219	[M-H]-	3	89886-42-0	C16326	43506.9	51900.5	55865	61993.5	57382.1	62773.3	66096.6	64764	66346	ko00592	C16326	-
Lcfn121170	4,6-diethyl-3,6-dihydroxy-8-methyldodec-4-enoicacid	Lipids	Free fatty acids	C17H32O4	299.22	281.21	300.23	[M-H]-	3	-	-	102475	82315	126247	151654	138845	139082	112801	104761	100558	-	-	-
Sasn010720	docosanedioic acid	Lipids	Free fatty acids	C22H42O4	369.3	307.3	370.308	[M-H]-	2	505-56-6	C19625	14663.1	16517.6	17312.5	18469.3	18961.1	14404.1	15937.3	10293.9	14614.6	ko00073	C19625	-
Lcfn143038	10-hydroxydecanoicacid10-O-beta-D-glucopyranoside	Lipids	Free fatty acids	C16H30O8	349.19	187.13	350.194	[M-H]-	3	-	-	443473	419878	436463	915761	921105	962384	1.5355e+06	1.60531e+06	1.53884e+06	-	-	-
pmf0293	1-Octadecanol	Lipids	Free fatty acids	C18H38O	269.29	209.23	270.292	[M-H]-	3	112-92-5	-	892668	947426	935471	934953	943848	944179	962271	1.08535e+06	1.08747e+06	-	-	-
Wafn011571	alpha-Hydroxylinoleic acid*	Lipids	Free fatty acids	C18H32O3	295.23	195.14	296.235	[M-H]-	2	57818-44-7	-	985793	932675	1.02053e+06	2.40146e+06	2.34736e+06	2.49151e+06	886102	890988	946568	-	-	-
Lmbn009444	Ricinoleic acid	Lipids	Free fatty acids	C18H34O3	297.24	183.14	298.251	[M-H]-	3	141-22-0	C08365	1.02384e+06	874784	933378	785492	789576	761823	973700	997907	995457	-	C08365	-
Zasn010433	Linolelaidic acid ethyl ester	Lipids	Free fatty acids	C20H36O2	307.26	307.26	308.272	[M-H]-	3	544-35-4	-	191572	161968	199657	294072	312281	244426	329262	321210	300103	-	-	-
MWS5231	Tridecanedioic acid	Lipids	Free fatty acids	C13H24O4	243.16	181.16	244.167	[M-H]-	3	505-52-2	-	351308	282522	439369	363759	408898	394782	333420	397127	375591	-	-	-
Lcsn006335	2-Hydroxymyristic acid	Lipids	Free fatty acids	C14H28O3	243.2	197.19	244.204	[M-H]-	3	2507-55-3	-	493216	488694	529832	272839	288091	316657	255893	225294	237907	-	-	-
Sasn010334	3,3,14,14-tetramethylhexadecanedioic acid	Lipids	Free fatty acids	C20H38O4	341.27	279.27	342.277	[M-H]-	1	87272-20-6	-	143679	106721	141617	347462	357370	350262	169021	167275	218309	-	-	-
MWSmce692	(6Z,9Z,12Z)-Octadecatrienoic acid	Lipids	Free fatty acids	C18H30O2	277.22	59.01	278.225	[M-H]-	3	506-26-3	C06426	214915	200726	228575	173009	193905	182799	142443	122068	168058	ko00591,ko01040,ko01100	C06426	-
Zasn010461	Methyl 14-methylpentadecanoate	Lipids	Free fatty acids	C17H34O2	269.25	269.25	270.256	[M-H]-	3	5129-60-2	-	1.5264e+06	1.26923e+06	1.40864e+06	4.96284e+06	5.1308e+06	4.05315e+06	4.36643e+06	4.19697e+06	4.07367e+06	-	-	-
Lmxn015337	Methyl palmitate	Lipids	Free fatty acids	C17H34O2	269.25	251.24	270.256	[M-H]-	3	112-39-0	C16995	19224.6	15442.7	22528.7	62320.8	60620.1	53449.7	51473	51672.5	43683.7	-	C16995	-
Safn009833	5-[(1S,2R,3R,5S)-3,5-dihydroxy-2-[(E,3S)-3-hydroxyoct-1-enyl]cyclopentyl]pentanoic acid	Lipids	Free fatty acids	C18H32O5	327.21	171.1	328.225	[M-H]-	2	-	-	1.56578e+06	1.41372e+06	1.58674e+06	5.47499e+06	5.57853e+06	5.61245e+06	1.07074e+06	1.13253e+06	1.05312e+06	-	-	-
Waptn06702	(9S)-Hydroxyoctadecadienoic acid	Lipids	Free fatty acids	C18H32O3	295.23	171.1	296.235	[M-H]-	2	73543-67-6	-	608415	571763	630122	796470	795168	828341	588643	626503	628791	-	-	-
Wahsn13426	1-O-p-Coumaroyl Tetradecanediol	Lipids	Free fatty acids	C23H36O4	375.26	145.03	376.261	[M-H]-	2	-	-	51263.2	46032.4	47960.9	15939	14430.9	14264.1	40366.9	42259	47496.8	-	-	-
Lmbn005369	13(S)-HODE;13(S)-Hydroxyoctadeca-9Z,11E-dienoic acid*	Lipids	Free fatty acids	C18H32O3	295.23	195.14	296.235	[M-H]-	2	10219-69-9	C14762	959322	928265	1.01907e+06	2.38586e+06	2.30091e+06	2.37882e+06	903868	885647	927029	ko00591	C14762	-
Zbfn013528	Beta-Hydroxypalmitic Acid*	Lipids	Free fatty acids	C16H32O3	271.23	225.22	272.235	[M-H]-	1	-	-	146304	115987	144467	139415	176484	144698	153636	148136	140781	-	-	-
Lmmn006896	3-Hydroxy-4-methyl-2-tridecanoyloxypentanoic acid methyl ester	Lipids	Free fatty acids	C20H38O5	357.26	59.01	358.272	[M-H]-	3	-	-	231475	193747	229935	583490	554943	549997	184202	231121	191487	-	-	-
Lmgn007652	Tianshic acid	Lipids	Free fatty acids	C18H34O5	329.23	211.13	330.241	[M-H]-	1	-	-	1.21083e+06	1.05777e+06	1.12145e+06	4.25391e+06	4.09103e+06	4.38991e+06	1.49904e+06	1.40778e+06	1.4726e+06	-	-	-
Lmbn005487	12,13-DHOME; (9Z)-12,13-Dihydroxyoctadec-9-enoic acid	Lipids	Free fatty acids	C18H34O4	313.24	251.24	314.246	[M-H]-	2	263399-35-5	C14829	523345	399052	560958	932009	902691	916811	548348	574717	629943	ko00591	C14829	-
MWS20033	20-Carboxyarachidonic Acid	Lipids	Free fatty acids	C20H30O4	333.21	289.22	334.214	[M-H]-	2	79551-84-1	-	3.05835e+06	2.8136e+06	2.84333e+06	4.83435e+06	4.88975e+06	4.6117e+06	5.96422e+06	4.21392e+06	4.02236e+06	-	-	-
Lmbn003970	9,12,13-TriHOME; 9(S),12(S),13(S)-Trihydroxy-10(E)-octadecenoic acid	Lipids	Free fatty acids	C18H34O5	329.23	211.14	330.241	[M-H]-	2	97134-11-7	C14833	1.18275e+06	952485	1.06693e+06	4.09153e+06	4.2719e+06	4.45162e+06	1.54682e+06	1.53452e+06	1.47947e+06	ko00591	C14833	-
MEDN1163	3-Hydroxyhexadecanoic acid	Lipids	Free fatty acids	C16H32O3	271.23	59.02	272.235	[M-H]-	3	2398-34-7	-	3.53194e+06	3.81601e+06	3.6135e+06	1.18276e+06	1.19643e+06	1.2278e+06	6.87213e+06	6.93817e+06	6.80658e+06	-	-	-
mws0752	Undecylic Acid	Lipids	Free fatty acids	C11H22O2	185.15	185.16	186.162	[M-H]-	3	112-37-8	C17715	570889	501266	590863	571516	606132	562110	624352	647436	536396	-	C17715	-
Wahsn10880	1-O-Feruloyl 9,10-Dihydroxypalmitic acid	Lipids	Free fatty acids	C26H40O7	463.27	175.04	464.277	[M-H]-	3	-	-	19901.4	22974.3	20698.7	56305.4	55558.8	55477.7	112404	112690	118184	-	-	-
MW0140176	15-HEPE	Lipids	Free fatty acids	C20H30O3	317.21	257.15	318.219	[M-H]-	3	88852-33-9	-	1.0798e+07	1.08995e+07	1.08214e+07	1.38505e+07	1.39468e+07	1.37086e+07	8.65964e+06	9.07693e+06	8.98975e+06	-	-	-
Safn013198	PG(16:0/18:2(9Z,12Z))	Lipids	Glycerol ester	C40H75O10P	745.5	279.23	746.51	[M-H]-	3	-	-	49953.9	56584.5	45447.6	64565.2	43779.2	28125.5	37011.3	34867.1	24210.6	-	-	-
Safn013373	2-methoxyhexadecanoic acid	Lipids	Free fatty acids	C17H34O3	285.24	239.24	286.251	[M-H]-	1	-	-	469451	435079	481200	564570	569792	542645	648731	713521	697762	-	-	-
MW0055437	Octadecanedioic acid	Lipids	Free fatty acids	C18H34O4	313.24	251.24	314.246	[M-H]-	3	871-70-5	-	536182	408566	589726	987956	927252	958171	572986	541113	585108	-	-	-
Lmbn007891	Hydroxy ricinoleic acid	Lipids	Free fatty acids	C18H34O4	313.24	183.14	314.246	[M-H]-	3	-	-	320098	286241	309178	298835	290734	310352	151800	140489	147226	-	-	-
Zmyn004676	17-Hydroxylinolenic acid	Lipids	Free fatty acids	C18H30O3	293.21	113.1	294.219	[M-H]-	2	-	C16346	118829	107523	133335	373210	393043	388000	139576	143338	143167	ko00592	C16346	-
Lmmn003323	2-Hydroxyhexadecanoic acid*	Lipids	Free fatty acids	C16H32O3	271.23	225.22	272.235	[M-H]-	1	764-67-0	-	155594	125233	141101	162085	192099	167682	160464	154441	160733	-	-	-
Lmln007483	6,9,10-Trihydroxyoctadec-7-enoic acid; Sanleng acid	Lipids	Free fatty acids	C18H34O5	329.23	171.1	330.241	[M-H]-	2	-	-	813730	813456	841640	5.52862e+06	5.36542e+06	5.52478e+06	1.04338e+06	1.02473e+06	1.01545e+06	-	-	-
Lcfn066903	3-Hydroxyoctanedioicacid	Lipids	Free fatty acids	C8H14O5	189.08	129.06	190.084	[M-H]-	3	73141-47-6	-	513365	468960	570593	969680	897233	864540	1.13928e+06	1.0937e+06	961156	-	-	-
Lcsn000415	Keto-Deoxy-Nonulonic acid	Lipids	Free fatty acids	C9H16O9	267.07	59.01	268.079	[M-H]-	2	153666-19-4	C20934	451447	504605	471838	806241	781707	820617	487017	447109	443801	ko00520,ko01100,ko01250	C20934	-
Wahsn05107	10-Hydroxydecanoic acid glucoside	Lipids	Free fatty acids	C16H30O8	349.19	187.13	350.194	[M-H]-	1	-	-	1.51719e+06	1.51375e+06	1.42019e+06	2.08606e+06	2.12925e+06	2.17566e+06	1.00163e+06	982051	963419	-	-	-
Wafn003485	Dihydroxyoctanoic acid glucoside	Lipids	Free fatty acids	C14H26O9	337.15	179.06	338.158	[M-H]-	3	-	-	870402	822687	863214	167737	199905	173789	449577	546771	488525	-	-	-
Wahsn11794	3-O-p-Coumaroyl 2,3-dihydroxypropyl-3-Hydroxytetradecanoate	Lipids	Free fatty acids	C26H40O7	463.27	145.03	464.277	[M-H]-	1	-	-	2.25905e+06	1.78642e+06	2.0492e+06	1.11642e+06	1.08991e+06	2.5386e+06	414232	1.14659e+06	528231	-	-	-
Waln011009	2-(2,3-dihydroxypropoxy)-3-(((2-(dimethylamino)ethoxy)(hydroxy)phosphoryl)oxy)propyl (11Z,14Z)-octadeca-11,14-dienoate	Lipids	LPE	C28H54NO9P	578.34	279.23	579.354	[M-H]-	1	-	-	84281.7	60082.2	75910.2	23556.5	49974.4	44146.7	20645.7	25879.7	28449.4	-	-	-
Hmyn007168	LysoPG 16:0	Lipids	Glycerol ester	C22H45O9P	483.27	255.23	484.28	[M-H]-	2	-	-	24141.9	2.43477e+06	2.47917e+06	38115.4	1.28121e+06	1.23038e+06	31061.4	332072	354069	-	-	-
Wagn012030	2-Palmitoyl-Sn-Glycerol 3-O-Diglucoside	Lipids	Glycerol ester	C31H58O14	653.38	397.14	654.383	[M-H]-	3	-	-	99802.4	133840	126111	100773	84546.7	133610	31486.6	24030.9	26432.7	-	-	-
WaYn011395	2-(2,3-dihydroxypropoxy)-3-(((2-(dimethylamino)ethoxy)(hydroxy)phosphoryl)oxy)propan-2-yl (Z)-14-Octadecenoic Acid	Lipids	LPE	C28H56NO9P	580.36	281.25	581.369	[M-H]-	3	-	-	11994.7	8293.79	20314.5	14386.5	7582.8	8731.41	9345.61	16373.6	6901.87	-	-	-
Waln014377	1-Linoleoyl-2-Lysophosphatidic Acid Monomethyl Ester	Lipids	Glycerol ester	C22H41O7P	447.25	279.23	448.258	[M-H]-	2	-	-	641679	801647	491257	517984	448264	1.14342e+06	632357	350192	354999	-	-	-
Zmjn001813	Pimelate	Lipids	Free fatty acids	C7H12O4	159.07	97.06	160.074	[M-H]-	3	111-16-0	C02656	31389.3	17867.4	27533.3	32422.7	30064.6	31711	24910.7	14429.9	20011.5	ko00780,ko01100,ko01240	C02656	-
pmb2787	9-Oxo-10E,12Z-octadecadienoic acid	Lipids	Free fatty acids	C18H30O3	293.21	275.2	294.219	[M-H]-	3	54232-59-6	C14766	55234.2	75565.9	138681	42142.1	93071	74861.3	105980	89197.1	85707.3	ko00591	C14766	-
Hmqn003054	9,10,11-Trihydroxy-12-octadecenoic acid	Lipids	Free fatty acids	C18H34O5	329.23	311.22	330.241	[M-H]-	3	61911-67-9	-	56291.1	66811.4	91936.6	294033	251513	310571	72008.3	88128.5	95773.7	-	-	-
Safn013183	1-Oleoylglycerone 3-phosphate	Lipids	Glycerol ester	C21H39O7P	433.23	152.99	434.243	[M-H]-	1	-	C03630	97511.1	771494	619832	277720	312641	55566.9	267998	271221	248565	-	C03630	-
Wahln11151	Icosanedioic Acid 1-(2,3-Dihydroxypropyl) Ester	Lipids	Glycerol ester	C23H44O6	415.31	341.27	416.314	[M-H]-	3	-	-	41945.3	27972	36121.4	87991	95584.2	93610	79489.2	90769.4	107518	-	-	-
Waln010192	2-(2,3-dihydroxypropoxy)-3-(((2-(dimethylamino)ethoxy)(hydroxy)phosphoryl)oxy)propyl (8E,11Z,14Z)-octadeca-8,11,14-trienoate	Lipids	LPE	C28H52NO9P	576.33	277.22	577.338	[M-H]-	1	-	-	120990	139490	115117	49810.3	38632	42714.4	25750.1	31470	30546.1	-	-	-
Lmbn004685	5S,8R-DiHODE; (5S,8R,9Z,12Z)-5,8-Dihydroxyoctadeca-9,12-dienoate	Lipids	Free fatty acids	C18H32O4	311.22	223.17	312.23	[M-H]-	3	-	C20186	66108.6	74151.8	66345.9	50032.4	70349.2	51891.2	35954.9	34212.5	66572.2	ko00591	C20186	-
Safn011471	2-hydroxy-3-{[3,4,5-trihydroxy-6-(hydroxymethyl)oxan-2-yl]oxy}propyl octadeca-9,12,15-trienoate	Lipids	Free fatty acids	C27H46O9	573.33	277.22	514.314	[M+CH3COOH-H]-	1	-	-	51712.2	37858.3	34758.6	30236.5	41157.5	25132.6	3229.04	12360.4	4252.32	-	-	-
mws0242	Suberic Acid	Lipids	Free fatty acids	C8H14O4	173.08	111.08	174.089	[M-H]-	3	505-48-6	C08278	65886.5	40440	53900.1	58762.6	85646.4	86572.3	36049.7	34790.1	50290.2	-	C08278	-
Lmbn004240	9,10-Dihydroxy-12,13-epoxyoctadecanoic acid	Lipids	Free fatty acids	C18H34O5	329.23	199.13	330.241	[M-H]-	3	-	C14837	260116	228347	257224	240733	272951	303850	212927	171540	174007	ko00591	C14837	-
Walbn05525	2-Decenedioic acid	Lipids	Free fatty acids	C10H16O4	199.1	155.11	200.105	[M-H]-	3	37443-67-7	-	68119.4	39040.6	64489.1	42713.5	79999.3	67822.3	7808.12	7808.12	7808.12	-	-	-
Sasn009432	9,10-Dihydroxystearic Acid	Lipids	Free fatty acids	C18H36O4	315.26	297.24	316.261	[M-H]-	2	-	C19622	1.42252e+07	1.39851e+07	1.43712e+07	1.58282e+07	1.57173e+07	1.57813e+07	8.91142e+06	8.82936e+06	8.88875e+06	ko00073	C19622	-
mws0955	12-Oxo-5,8,10,14-eicosatetraenoic acid	Lipids	Free fatty acids	C20H30O3	317.21	113.1	318.219	[M-H]-	3	108437-64-5	C14807	145508	136334	151126	153034	167623	164213	94668.3	100798	108492	ko00590	C14807	-
mws0967	Lipoxin A4	Lipids	Free fatty acids	C20H32O5	351.22	271.21	352.225	[M-H]-	2	89663-86-5	C06314	452397	359692	230867	280405	327467	256120	435729	266968	370521	ko00590,ko01100,ko04148	C06314	-
Lmyn012331	(6Z)-Octadecenoic acid*	Lipids	Free fatty acids	C18H34O2	281.25	281.25	282.256	[M-H]-	2	593-39-5	C08363	514494	395800	778324	509747	403804	412774	569919	473278	570928	-	C08363	-
Safn010965	Porrigenic acid	Lipids	Free fatty acids	C18H30O4	309.21	171.1	310.214	[M-H]-	3	-	-	19969.6	23041.4	21025.4	12455.3	15284.9	11819.7	9053.28	17367.9	18030.6	-	-	-
Wahsn05750	12-Oxododecanoic acid glucoside	Lipids	Free fatty acids	C18H32O8	375.2	195.14	376.21	[M-H]-	3	-	-	89817.3	44363.1	69531.1	58681.1	31730.3	42231.6	29767.7	26064.1	30691.3	-	-	-
Lmbn005662	9(10)-EpOME;(9R,10S)-(12Z)-9,10-Epoxyoctadecenoic acid	Lipids	Free fatty acids	C18H32O3	295.23	171.1	296.235	[M-H]-	1	16833-56-0	C14825	23553.1	17864.1	19992.5	66858.4	68609.4	54158.1	39030.5	33644.6	40454.2	ko00591,ko01100	C14825	-
Lmmn006932	2-Hydroxy-4-methyl-3-tridecanoyloxypentanoic acid methyl ester	Lipids	Free fatty acids	C20H38O5	357.26	297.24	358.272	[M-H]-	3	-	-	332024	308131	316101	371538	384606	349778	95286.3	95364.4	99681.9	-	-	-
pmn001686	10,16-Dihydroxyhexadecanoic acid	Lipids	Free fatty acids	C16H32O4	287.22	241.22	288.23	[M-H]-	3	3233-90-7	C08285	160335	161402	157467	153381	136863	162137	124868	117076	130047	ko00073	C08285	-
Wacn005438	Hydroxypentadecenoic acid glucoside	Lipids	Free fatty acids	C21H38O8	477.27	161.04	418.257	[M+CH3COOH-H]-	2	-	-	58051.6	58817.9	45529.7	85053.1	79351.6	61913.1	34564.2	34315.3	27713.2	-	-	-
MW0144100	9-Hydroxyicosa-5,7,11,14,17-pentaenoic acid	Lipids	Free fatty acids	C20H30O3	377.23	317.21	318.219	[M+CH3COO]-	3	-	-	203629	170798	185208	111846	95905.6	90269.8	132861	104390	112057	-	-	-
pmb2804	(9Z,11E)-(13S)-13-Hydroperoxyoctadeca-9,11-dienoic acid	Lipids	Free fatty acids	C18H32O4	311.22	171.14	312.23	[M-H]-	3	33964-75-9	C04717	54860.8	47313.1	44038.1	53767.7	50942.5	55637.3	31752.5	31954.5	35105.5	ko00591,ko01100	C04717	-
MWS2685	12-HETE; 12-Hydroxy-5,8,10,14-eicosatetraenoic acid	Lipids	Free fatty acids	C20H32O3	319.23	179.11	320.235	[M-H]-	3	71030-37-0	-	8508.04	9365.84	8381.99	20713.6	11390.8	12095.1	9796.21	3975.22	10789.2	-	-	-
MWS2687	16-HETE; 16-Hydroxy-5,8,11,14-eicosatetraenoic acid	Lipids	Free fatty acids	C20H32O3	319.23	233.16	320.235	[M-H]-	3	128914-46-5	-	1121.82	1121.82	1121.82	5609.11	15875.9	14385.1	12701.4	9235.55	14015.5	-	-	-
pmn001691	9,12,13-Trihydroxy-10,15-octadecadienoic acid	Lipids	Free fatty acids	C18H32O5	327.22	291.2	328.225	[M-H]-	2	-	-	279675	273444	266917	426101	478738	406578	192985	210118	175023	-	-	-
mws0930	Docosapentaenoic acid	Lipids	Free fatty acids	C22H34O2	329.25	285.26	330.256	[M-H]-	2	24880-45-3	C16513	107293	42555.8	64861.1	44796.7	74738.8	54476.7	28365.9	31967.1	38187.1	ko01040	C16513	-
Lmyn007883	9,16-Dihydroxypalmitic acid	Lipids	Free fatty acids	C16H32O4	287.22	287.22	288.23	[M-H]-	3	38076-49-2	-	474444	575449	464477	886581	717734	987087	679712	644428	769106	-	-	-
MWS2684	12-HEPE; 12-Hydroxy-5,8,10,14,17-eicosapentaenoic acid	Lipids	Free fatty acids	C20H30O3	317.21	179.11	318.219	[M-H]-	1	81187-21-5	-	3140.57	3140.57	3140.57	3140.57	3140.57	3140.57	20637.5	28021.1	15702.8	-	-	-
mws2623	11-Octadecanoic acid(Vaccenic acid)*	Lipids	Free fatty acids	C18H34O2	281.25	281.25	282.256	[M-H]-	2	506-17-2	C21944	423236	414604	328971	65794.3	65794.3	65794.3	641532	600890	579851	-	C21944	-
Lhkp101512	Ostruthin	Lignans and Coumarins	Coumarins	C19H22O3	299.164	175.039	298.157	[M+H]+	3	148-83-4	C09281	628181	475005	527556	612034	665130	912623	969737	828105	520053	-	C09281	-
Hmcp009386	Alloimperatorin*	Lignans and Coumarins	Coumarins	C16H14O4	271.1	147.05	270.089	[M+H]+	3	642-05-7	C09053	2.47057e+07	2.50869e+07	2.55907e+07	2.50837e+07	2.55971e+07	2.53818e+07	2.216e+07	2.05377e+07	2.1572e+07	-	C09053	-
pmf0525	Imperatorin*	Lignans and Coumarins	Coumarins	C16H14O4	271.1	147.04	270.089	[M+H]+	3	482-44-0	C09269	2.47057e+07	2.50869e+07	2.55907e+07	2.50837e+07	2.55971e+07	2.53818e+07	2.216e+07	2.05377e+07	2.1572e+07	-	C09269	-
Lmjp101202	murrayone	Lignans and Coumarins	Coumarins	C15H14O4	259.1	189.05	258.089	[M+H]+	3	19668-69-0	-	650181	646959	408523	812464	479085	603792	1.01826e+06	577704	923921	-	-	-
HX1251	Austrobailignan-5	Lignans and Coumarins	Lignans	C20H22O4	327.15	137.06	326.152	[M+H]+	3	-	-	772411	804320	771511	974551	799562	885159	932856	909785	1.0311e+06	-	-	-
Zmdp006307	sanshodiol*	Lignans and Coumarins	Lignans	C20H22O6	359.15	137.06	358.142	[M+H]+	1	-	-	247405	540486	300767	2.26856e+06	2.36286e+06	2.0763e+06	502956	280540	674828	-	-	-
MWSslk135	7,8-Dihydroxy-4-methylcoumarin	Lignans and Coumarins	Coumarins	C10H8O4	193.05	147.05	192.042	[M+H]+	3	2107-77-9	-	9.07012e+06	7.98273e+06	8.96542e+06	4.75722e+06	5.79934e+06	5.08207e+06	1.08766e+07	9.69125e+06	9.36888e+06	-	CM01424	MetMap133
MWSmce159	6,7-Dihydroxy-4-methylcoumarin	Lignans and Coumarins	Coumarins	C10H8O4	193.05	147.04	192.042	[M+H]+	3	529-84-0	-	1.08179e+07	1.03621e+07	9.84856e+06	7.36404e+06	5.48492e+06	7.24611e+06	1.20693e+07	1.03597e+07	1.31502e+07	-	CM01376	MetMap129,MetMap133
MWSmce324	Psoralen*	Lignans and Coumarins	Coumarins	C11H6O3	187.04	131.05	186.032	[M+H]+	3	66-97-7	C09305	1.29728e+06	1.13929e+06	1.20219e+06	594907	944357	701699	1.41928e+06	1.21664e+06	1.11017e+06	ko00999,ko01110	C09305	-
MWSCX014	Scopoletin	Lignans and Coumarins	Coumarins	C10H8O4	193.05	133.03	192.042	[M+H]+	3	92-61-5	C01752	3.28933e+06	2.99985e+06	2.89172e+06	2.98081e+06	3.55784e+06	3.68603e+06	3.30808e+06	2.9566e+06	2.79809e+06	ko00999,ko01110	C01752	-
MWSmce301	Coumarin-3-carboxylic Acid	Lignans and Coumarins	Coumarins	C10H6O4	191.03	173.02	190.027	[M+H]+	3	531-81-7	-	771162	683075	1.05022e+06	520451	982053	799717	537274	695077	549063	-	CM01421	MetMap133
Lskp211385	dihydrosesamin*	Lignans and Coumarins	Lignans	C20H20O6	357.13	307.09	356.126	[M+H]+	3	-	-	529810	731994	786620	1.61881e+06	1.2407e+06	1.33775e+06	315900	459779	481206	-	-	-
Sayp006468	Acutissimalignan B*	Lignans and Coumarins	Lignans	C20H20O6	357.13	307.1	356.126	[M+H]+	3	-	-	529810	731994	786620	1.61881e+06	1.2407e+06	1.33775e+06	315900	459779	481206	-	-	-
MWStz497	Matairesinol*	Lignans and Coumarins	Lignans	C20H22O6	359.15	137.06	358.142	[M+H]+	1	580-72-3	C10682	2.46892e+07	4.23844e+07	2.89447e+07	1.29495e+08	1.87889e+08	1.76004e+08	3.8513e+07	3.072e+07	5.92268e+07	ko00999,ko01100,ko01110	C10682	-
Wbwp012377	Meso-dihydroguaiaretic acid	Lignans and Coumarins	Lignans	C20H26O4	331.19	81.07	330.183	[M+H]+	3	66322-34-7	-	493242	347399	339498	317351	337595	203855	289398	296922	366728	-	-	-
Lmjp102211	Agrimonolide	Lignans and Coumarins	Coumarins	C18H18O5	315.12	121.06	314.115	[M+H]+	3	21499-24-1	-	111507	96490.6	106214	50953.4	118471	49599.4	94097.7	114402	117522	-	-	-
Lhmp122215	dalnigrin	Lignans and Coumarins	Coumarins	C17H14O5	299.09	284.07	298.084	[M+H]+	3	-	-	5.91336e+06	6.15182e+06	7.08356e+06	4.98381e+06	5.24873e+06	5.59014e+06	5.03746e+06	4.5366e+06	4.5754e+06	-	CM01405	MetMap129
Yajp005452	Hovetrichoside B	Lignans and Coumarins	Lignans	C23H30O11	483.19	317.09	482.179	[M+H]+	3	-	-	8.63321e+06	7.73862e+06	7.77384e+06	1.07961e+07	1.18233e+07	1.13113e+07	6.77052e+06	6.97685e+06	6.83355e+06	-	-	-
Waptp02740	6-Methoxycoumarin*	Lignans and Coumarins	Coumarins	C10H8O3	177.05	89.04	176.047	[M+H]+	1	-	-	1.05986e+07	9.39109e+06	1.03239e+07	1.43718e+07	1.70338e+07	1.51601e+07	8.87741e+06	9.00555e+06	1.02685e+07	-	-	-
WaXYp10675	4-hydroxy-7H-furo[3,2-f]chromen-7-one	Lignans and Coumarins	Coumarins	C11H6O4	203.03	147.04	202.026	[M+H]+	3	-	-	1.15277e+06	917990	1.06454e+06	1.41221e+06	936359	1.16999e+06	570777	801396	954191	-	-	-
Lhhp102923	(7'R,8'R)-7'8'-dihydro-7'-(5'-hydroxy-3'-methoxphenyl)-3-methoxy-8'-methyl-1-(E)-propenylbenzof-uran	Lignans and Coumarins	Lignans	C20H22O4	327.16	137.06	326.152	[M+H]+	3	-	-	9.07605e+06	1.08617e+07	8.07328e+06	9.83763e+06	2.13245e+07	2.76609e+07	1.12645e+07	1.16888e+07	1.27283e+07	-	-	-
Lhhp111111	Schisantherin E	Lignans and Coumarins	Lignans	C30H34O9	539.23	137.06	538.22	[M+H]+	3	64917-83-5	-	1.33658e+06	1.13924e+06	875019	419201	729322	506612	655611	401520	410095	-	-	-
Cmpp007319	7-Methoxy-5-Prenyloxycoumarin	Lignans and Coumarins	Coumarins	C15H16O4	261.11	189.06	260.105	[M+H]+	3	35590-41-1	-	248721	294395	251188	641053	687472	625711	347372	329276	296108	-	-	-
Wcdp001713	Daphnetin-8-Glucoside	Lignans and Coumarins	Coumarins	C15H16O9	341.08	179.04	340.079	[M+H]+	2	20853-56-9	-	113069	185555	126526	151579	214678	235476	58745.9	205989	144571	-	CM01441	MetMap133
Waptp03206	7-Hydroxy-8-Methoxychromanon*	Lignans and Coumarins	Coumarins	C10H10O4	195.06	117.03	194.057	[M+H]+	2	-	-	5.33054e+06	4.54479e+06	5.20738e+06	8.18989e+06	7.1863e+06	8.2249e+06	4.77181e+06	4.85361e+06	4.29801e+06	-	-	-
Waptp02742	5-Hydroxy-6-Methoxychromanon	Lignans and Coumarins	Coumarins	C10H10O4	195.06	117.03	194.057	[M+H]+	1	-	-	5.34977e+06	5.0236e+06	5.46537e+06	7.01121e+06	7.91441e+06	8.25004e+06	4.78925e+06	5.35114e+06	4.23268e+06	-	-	-
Waptp03029	8-Methoxycoumarin*	Lignans and Coumarins	Coumarins	C10H8O3	177.05	89.04	176.047	[M+H]+	1	-	-	1.11186e+07	9.82406e+06	1.12458e+07	1.5823e+07	1.6798e+07	1.71059e+07	9.80521e+06	1.06189e+07	9.05597e+06	-	-	-
HX1372	guaiacylglycerol-β-coniferyl ether	Lignans and Coumarins	Lignans	C20H24O7	377.16	163.08	376.152	[M+H]+	3	-	-	110833	57092.3	64237.7	57165.5	66564.2	85000.8	80393.9	81568.5	121724	-	-	-
Zmxp004471	Thunberginol B	Lignans and Coumarins	Coumarins	C15H10O6	287.06	153.02	286.048	[M+H]+	3	147666-81-7	-	4.63416e+06	3.52572e+06	3.04075e+06	4.27338e+06	3.89818e+06	4.76854e+06	3.74567e+06	2.91019e+06	3.69992e+06	-	-	-
Qmzp101810	Dimethoxysamin	Lignans and Coumarins	Lignans	C14H18O5	267.123	189.085	266.115	[M+H]+	3	-	-	183672	259646	220168	320369	260918	308315	194657	185814	109248	-	-	-
mad1424	Ditartaroyl-hydroxycoumarin	Lignans and Coumarins	Coumarins	C17H14O13	427.05	295.05	426.043	[M+H]+	3	-	-	5.11693e+06	3.0722e+06	4.30005e+06	4.51411e+06	5.28323e+06	5.03513e+06	2.33104e+06	6.5439e+06	4.24381e+06	-	-	-
Lahp003986	3,4-Dihydro-4-(4'-hydroxyphenyl)-5,7-dihydroxycoumarin glucoside	Lignans and Coumarins	Coumarins	C21H22O10	435.13	273.08	434.121	[M+H]+	3	-	-	990551	1.03677e+06	714390	679832	1.17165e+06	1.27631e+06	2.20659e+06	1.40259e+06	2.95528e+06	-	-	-
mws1014	Fraxetin	Lignans and Coumarins	Coumarins	C10H8O5	209.04	149.02	208.037	[M+H]+	3	574-84-5	C09265	3.28667e+06	2.19873e+06	2.97638e+06	3.84759e+06	6.09476e+06	3.98304e+06	4.76838e+06	4.89947e+06	3.29513e+06	ko00999,ko01110	C09265	MetMap129
Waptp03409	6-Hydroxy-7-Methoxychromanon*	Lignans and Coumarins	Coumarins	C10H10O4	195.06	117.03	194.057	[M+H]+	2	-	-	2.01835e+06	1.65095e+06	1.7825e+06	1.36255e+06	1.79762e+06	1.80514e+06	1.33558e+06	1.13922e+06	1.03643e+06	-	-	-
Cmpp007452	Auraptenol	Lignans and Coumarins	Coumarins	C15H16O4	261.11	189.06	260.105	[M+H]+	3	1221-43-8	-	177789	205023	201535	684850	598206	533209	297551	264450	337124	-	-	-
Lamp006225	Hydroxymethyl coumarin glucoside	Lignans and Coumarins	Coumarins	C16H18O8	339.11	177.05	338.1	[M+H]+	3	-	-	918396	1.25295e+06	982250	1.27475e+06	1.10792e+06	1.30442e+06	729185	669054	584909	-	CM01423	MetMap133
Walp011877	7-O-Geranyl 6-methoxychroman-2-one	Lignans and Coumarins	Coumarins	C20H26O4	331.19	177.05	330.183	[M+H]+	3	-	-	736716	433213	578943	510080	664423	205143	386131	414216	538724	-	-	-
Lafp006517	Arctigenin	Lignans and Coumarins	Lignans	C21H24O6	373.17	137.06	372.157	[M+H]+	3	7770-78-7	C10545	740331	867016	904833	725774	796482	808524	543507	542641	618409	-	C10545	-
Lhqp101805	Skimmin (7-Hydroxycoumarin-7-O-glucoside)	Lignans and Coumarins	Coumarins	C15H16O8	325.09	163.04	324.084	[M+H]+	2	93-39-0	-	365726	439975	291191	248436	207049	572342	214515	23858.1	188145	-	-	-
MWSmce024	Scopolin	Lignans and Coumarins	Coumarins	C16H18O9	355.1	193.05	354.095	[M+H]+	3	531-44-2	C01527	1.15513e+06	1.16953e+06	1.13192e+06	438176	418174	388523	428165	294393	362994	ko00999,ko01110	C01527	-
pma0104	N-Sinapoylhydroxycoumarin	Lignans and Coumarins	Coumarins	C20H16O7	369.1	207.07	368.09	[M+H]+	3	-	-	644736	407592	381635	1.75207e+06	1.50285e+06	2.00313e+06	496241	676373	738841	-	-	-
pmb1207	O-Feruloyl 3-hydroxycoumarin*	Lignans and Coumarins	Coumarins	C19H14O6	339.09	177.05	338.079	[M+H]+	3	-	-	1.365e+06	1.60183e+06	1.83701e+06	2.37655e+06	1.93874e+06	2.31503e+06	1.75785e+06	1.53603e+06	2.32216e+06	-	-	-
Lajp008202	7-methoxy-8-(3-methyl-2-oxo-3-butenl)coumarin	Lignans and Coumarins	Coumarins	C15H16O4	261.11	205.05	260.105	[M+H]+	3	76474-93-6	-	369213	340686	344118	224318	115052	265923	253210	221948	238195	-	-	-
Lazn006152	Isoshonanin*	Lignans and Coumarins	Lignans	C20H22O5	343.15	105.03	342.147	[M+H]+	3	-	-	52194.8	41471.8	41032	50513.3	81706.8	38774	57796.1	52030.8	88670.7	-	-	-
Qatp010618	Lignans Machilin F*	Lignans and Coumarins	Lignans	C20H22O5	343.15	105.03	342.147	[M+H]+	3	-	-	52194.8	41471.8	41032	50513.3	81706.8	38774	57796.1	52030.8	88670.7	-	-	-
Lhhp102904	Horsfieldin*	Lignans and Coumarins	Lignans	C20H20O6	357.13	307.09	356.126	[M+H]+	3	-	-	433925	657766	665384	1.47033e+06	1.4233e+06	1.2573e+06	541245	512906	587432	-	-	-
Wbwp006397	(3r,4r)-3-(2h-1,3-benzodioxol-5-ylmethyl)-4-[(4-hydroxy-3-methoxyphenyl)methyl]oxolan-2-one*	Lignans and Coumarins	Lignans	C20H20O6	357.13	307.1	356.126	[M+H]+	3	-	-	433925	657766	665384	1.47033e+06	1.4233e+06	1.2573e+06	541245	512906	587432	-	-	-
Yxxp005044	Balanophonin	Lignans and Coumarins	Lignans	C20H20O6	357.13	137.06	356.126	[M+H]+	3	118916-57-7	-	2.45998e+06	2.47067e+06	3.5697e+06	1.06703e+07	1.25274e+07	1.12075e+07	3.15177e+06	3.14862e+06	3.68703e+06	-	-	-
Labp005432	Dalbergin malonyl glucoside	Lignans and Coumarins	Coumarins	C25H24O12	517.13	269.08	516.127	[M+H]+	1	-	-	2.56874e+06	544478	322983	246178	257796	257436	405134	435245	399114	-	CM01392	MetMap129
Lhqp101806	Eleutheroside B1	Lignans and Coumarins	Coumarins	C17H20O10	385.11	223.06	384.106	[M+H]+	3	16845-16-2	-	2.10803e+06	2.22331e+06	2.0964e+06	2.52083e+06	2.28042e+06	1.6503e+06	2.07823e+06	2.0137e+06	2.08436e+06	-	-	-
Lhsp101912	Dehydrodiconiferyl alcohol	Lignans and Coumarins	Lignans	C20H22O6	359.15	327.12	358.142	[M+H]+	3	4263-87-0	-	87544.5	109748	92469.2	75658.3	57321	87362.4	76631.7	97203	74150.6	-	-	-
Wbmp004818	balanophon n	Lignans and Coumarins	Lignans	C20H20O6	357.13	203.07	356.126	[M+H]+	3	-	-	962174	925636	1.0303e+06	795863	969682	882970	689310	863194	656897	-	-	-
Lmzp006972	Dimethylmatairesinol*	Lignans and Coumarins	Lignans	C22H26O6	387.18	151.08	386.173	[M+H]+	3	25488-59-9	-	185328	280509	233931	185756	138385	160389	214535	291950	339339	-	-	-
Lajp009638	7-Methoxy-8-(3-methylbuta-1,3-dien-1-yl)-2H-chromen-2-one	Lignans and Coumarins	Coumarins	C15H14O3	243.1	131.05	242.094	[M+H]+	3	112667-50-2	-	779398	636995	803546	71709.4	71709.4	71709.4	510846	500913	358547	-	-	-
Lskp211249	epieudesmin	Lignans and Coumarins	Lignans	C22H26O6	387.18	137.06	386.173	[M+H]+	3	-	-	242887	165100	143685	195531	137689	190812	111863	109256	65099.6	-	-	-
Lmbp002255	Fraxetin-8-O-glucoside (Fraxin)	Lignans and Coumarins	Coumarins	C16H18O10	371.102	209.048	370.09	[M+H]+	3	524-30-1	C09266	39927.4	39927.4	39927.4	426103	493848	199637	469090	357991	328232	-	C09266	-
Lasp003143	1,4-Benzodioxin-6-propanol	Lignans and Coumarins	Lignans	C11H12O3	193.09	105.07	192.078	[M+H]+	3	-	-	320721	373169	322031	64144.2	64144.2	64144.2	383821	345530	377115	-	-	-
MWStz411	(-)-Isolariciresinol 9'-O-glucoside	Lignans and Coumarins	Lignans	C26H34O11	523.22	219.1	522.21	[M+H]+	1	143236-04-8	-	310226	156515	202531	82714.8	144224	76864.9	112163	91143.9	255298	-	-	-
Lcrp000362	4-[3-ethyl-5-[(E)-3-hydroxyprop-1-enyl]-7-methoxy-2,3-dihydro-1-benzofuran-2-yl]-2-methoxyphenol	Lignans and Coumarins	Lignans	C21H24O5	357.17	135.04	356.162	[M+H]+	3	-	-	981610	931508	964637	674179	516974	560546	366277	443748	418237	-	-	-
mws1668	Angelicin*	Lignans and Coumarins	Coumarins	C11H6O3	187.04	131.05	186.032	[M+H]+	3	523-50-2	C09060	920983	1.24185e+06	2.54459e+06	2.30419e+06	1.06743e+06	801990	880905	826596	2.0823e+06	ko00999,ko01110	C09060	-
MWSprf129	Pinoresinol dimethyl ether*	Lignans and Coumarins	Lignans	C22H26O6	387.18	151.08	386.173	[M+H]+	3	29106-36-3	C10561	303018	315172	194930	149043	183912	136535	318517	297899	323634	-	C10561	-
zjbp111502	Ciwujiatone	Lignans and Coumarins	Lignans	C22H26O9	435.16	181.05	434.158	[M+H]+	3	-	-	5672.23	5672.23	5672.23	100236	108002	115834	84364.5	28361.2	96242.2	-	-	-
Lhnp111728	Massoniresinol; Vladinol A	Lignans and Coumarins	Lignans	C20H24O8	393.15	151.04	392.147	[M+H]+	2	96087-10-4	-	41846.1	68393.7	40190.8	7020.29	7020.29	7020.29	78496.2	35101.5	46105.1	-	-	-
HX1373	threo-guaiacylglycerol-β-coniferyl ether	Lignans and Coumarins	Lignans	C20H24O7	377.16	163.08	376.152	[M+H]+	3	-	-	14337.3	14337.3	14337.3	104827	169662	139192	71686.7	94779.9	135197	-	-	-
Lajp004391	Paniculin	Lignans and Coumarins	Coumarins	C15H16O5	277.11	189.05	276.1	[M+H]+	3	-	-	200307	160409	659978	32081.7	32081.7	32081.7	318394	312546	282955	-	-	-
pmp000023	Neobyakangelicol	Lignans and Coumarins	Coumarins	C17H16O6	317.102	233.048	316.095	[M+H]+	3	35214-82-5	C17126	2.61552e+06	1.95997e+06	2.81873e+06	1.39831e+06	1.62882e+06	1.45087e+06	981866	1.75711e+06	1.30675e+06	-	C17126	-
Cmyp003288	Edgeworin	Lignans and Coumarins	Coumarins	C18H10O6	323.06	149.02	322.048	[M+H]+	3	120028-43-5	-	92109.7	107763	116307	71859.9	65377.9	48755.5	9751.11	9751.11	9751.11	-	-	-
pmb1178	O-Feruloyl 7-hydroxycoumarin*	Lignans and Coumarins	Coumarins	C19H14O6	339.09	177.05	338.079	[M+H]+	3	-	-	1.33728e+06	1.35613e+06	1.18992e+06	1.71572e+06	1.89748e+06	1.5358e+06	1.56269e+06	1.64852e+06	1.59793e+06	-	-	-
Lhqp101807	Osthol	Lignans and Coumarins	Coumarins	C15H16O3	245.12	189.06	244.11	[M+H]+	3	484-12-8	C09280	639003	633481	719915	436376	639245	481816	569652	535395	664075	-	C09280	-
pmp000024	Isobyakangelicol	Lignans and Coumarins	Coumarins	C17H16O6	317.102	233.048	316.095	[M+H]+	3	35214-81-4	C16914	65810.8	65810.8	65810.8	65810.8	65810.8	65810.8	651451	669713	330056	-	C16914	-
Lmjp101206	Murpaniculol	Lignans and Coumarins	Coumarins	C15H16O5	277.11	189.05	276.1	[M+H]+	3	-	-	89173.3	89173.3	89173.3	683259	747742	906229	89173.3	89173.3	89173.3	-	-	-
pmf0526	Isoimperatorin	Lignans and Coumarins	Coumarins	C16H14O4	271.1	147.04	270.089	[M+H]+	3	482-45-1	C16976	68392.9	68392.9	68392.9	68392.9	68392.9	68392.9	3.01415e+06	1.2782e+06	1.4279e+06	-	C16976	-
MWSmce221	5,7-Dihydroxy-4-methylcoumarin	Lignans and Coumarins	Coumarins	C10H8O4	193.05	91.05	192.042	[M+H]+	3	2107-76-8	-	773016	645504	877679	1.03237e+06	1.43367e+06	749640	735818	1.08315e+06	1.12805e+06	-	-	-
Lhnp110107	Cycloolivil	Lignans and Coumarins	Lignans	C20H24O7	377.158	121.064	376.152	[M+H]+	3	3064-05-9	-	57663	68681.6	70489.8	265140	271182	233864	357158	394793	383293	-	-	-
Lmbp003208	Fraxidinglucoside	Lignans and Coumarins	Coumarins	C17H20O10	385.12	223.06	384.106	[M+H]+	3	58970-71-1	-	925427	947501	1.26953e+06	883408	1.48988e+06	1.43122e+06	786126	576976	449963	-	CM01391	MetMap129
Lmbp002962	Isofraxetin	Lignans and Coumarins	Coumarins	C10H8O5	209.05	194.02	208.037	[M+H]+	3	50656-75-2	-	1.49565e+06	1.13073e+06	1.04015e+06	1.44876e+06	862600	1.28247e+06	1.36205e+06	1.50858e+06	1.03875e+06	-	CM01383	MetMap129
pmp000020	Oxypeucedanin*	Lignans and Coumarins	Coumarins	C16H14O5	287.09	203.04	286.084	[M+H]+	3	737-52-0	C09282	1.21387e+06	1.06098e+06	1.10258e+06	1.99452e+06	2.14033e+06	2.20858e+06	1.28466e+06	1.20402e+06	1.3631e+06	-	C09282	-
pmp000019	Pabulenol*	Lignans and Coumarins	Coumarins	C16H14O5	287.09	203.04	286.084	[M+H]+	3	33889-70-2	-	1.11741e+06	1.15338e+06	1.13225e+06	2.14308e+06	2.18606e+06	1.93647e+06	1.1795e+06	1.08761e+06	1.21978e+06	-	-	-
MWSmce472	7-Amino-4-(trifluoromethyl)coumarin	Lignans and Coumarins	Coumarins	C10H6F3NO2	230.04	136.06	229.035	[M+H]+	3	53518-15-3	-	4774.86	4774.86	4774.86	4774.86	4774.86	4774.86	68452.2	23874.3	35811.8	-	-	-
Lhzp102808	Sesamin	Lignans and Coumarins	Lignans	C20H18O6	355.1	163.04	354.11	[M+H]+	3	607-80-7	C10882	205815	195809	208490	121105	82810.9	126130	156960	76849.5	133725	-	C10882	-
MWSmce267	Columbianadin	Lignans and Coumarins	Coumarins	C19H20O5	329.13	187.04	328.131	[M+H]+	3	5058-13-9	-	822106	615372	887624	1.23527e+06	1.15901e+06	528083	531190	583565	485795	-	-	-
Wagp008739	7,8-Dihydrofurocoumarin	Lignans and Coumarins	Coumarins	C11H8O3	189.05	131.05	188.047	[M+H]+	3	51559-40-1	-	677117	653434	787065	2.1741e+06	2.1661e+06	2.90195e+06	399831	624757	531165	-	-	-
Smzp003409	11-O-Syringoylbergenin	Lignans and Coumarins	Coumarins	C23H24O13	509.12	181.04	508.122	[M+H]+	3	-	-	93262	78620.2	127481	84240.2	21995.5	54463.2	4399.09	4399.09	4399.09	-	-	-
Lmjp101204	Isomeranzin	Lignans and Coumarins	Coumarins	C15H16O4	261.11	201.09	260.105	[M+H]+	3	1088-17-1	-	683143	849947	810420	1.24414e+06	1.26825e+06	1.48756e+06	596559	629773	760843	-	-	-
Lhkp101525	Apiosylskimmin (Adicardin)	Lignans and Coumarins	Coumarins	C20H24O12	457.13	163.04	456.127	[M+H]+	3	103529-94-8	-	3577.3	3577.3	3577.3	23083.8	20524.8	29025.5	26978.2	21906.1	17886.5	-	-	-
pmp000284	Fraxidin (8-Hydroxy-6,7-dimethoxycoumarin)	Lignans and Coumarins	Coumarins	C11H10O5	223.06	208.04	222.053	[M+H]+	3	525-21-3	C17479	13655.6	13655.6	13655.6	166703	234489	177594	13655.6	13655.6	13655.6	-	C17479	MetMap129
Wbwp010459	5-[(2r,3s,4s,5s)-5-(2h-1,3-benzodioxol-5-yl)-3,4-dimethyloxolan-2-yl]-2-methoxyphenol	Lignans and Coumarins	Lignans	C20H22O5	343.15	163.07	342.147	[M+H]+	3	-	-	4434.34	4434.34	4434.34	4434.34	4434.34	4434.34	68410.9	42819.2	75930.9	-	-	-
Lhmp121005	Symplocosin	Lignans and Coumarins	Lignans	C26H32O11	521.2	131.05	520.194	[M+H]+	3	11042-30-1	-	2289.84	2289.84	2289.84	2289.84	2289.84	2289.84	20698.5	21820.1	11449.2	-	-	-
pmb0382	O-Feruloyl 4-hydroxycoumarin	Lignans and Coumarins	Coumarins	C19H14O6	339.09	177.05	338.079	[M+H]+	3	-	-	1.6188e+06	1.61536e+06	1.61088e+06	1.93001e+06	1.94866e+06	2.05853e+06	872055	1.00361e+06	863382	-	-	-
Lcyp000676	Isoscopoletin-β-D-glucoside	Lignans and Coumarins	Coumarins	C16H18O9	355.1	163.04	354.095	[M+H]+	3	20186-29-2	-	198154	204030	166089	17248.7	17248.7	17248.7	138681	166472	205680	-	CM01404	MetMap129
Lmjp002764	Umckalin (7-hydroxy-5,6-dimethoxycoumarin)	Lignans and Coumarins	Coumarins	C11H10O5	223.06	190.03	222.053	[M+H]+	3	43053-62-9	-	101093	106343	73629.9	11719.9	11719.9	11719.9	11719.9	11719.9	11719.9	-	CM01387	MetMap129
MWSmce017	7,8-Dihydroxycoumarin	Lignans and Coumarins	Coumarins	C9H6O4	179.03	133.03	178.027	[M+H]+	3	486-35-1	C03093	1.33441e+06	383063	1.50598e+06	509422	634599	329735	65947	65947	65947	-	C03093	-
MWSmce184	Ethyl 3-coumarincarboxylate	Lignans and Coumarins	Coumarins	C12H10O4	219.06	173.03	218.058	[M+H]+	3	1846-76-0	-	560965	521790	600974	534876	347088	558805	217307	415532	455155	-	CM01431	MetMap133
MWSslk069	7-Methoxy-4-Methylcoumarin	Lignans and Coumarins	Coumarins	C11H10O3	191.07	135.08	190.063	[M+H]+	3	2555-28-4	-	375548	165249	342245	281586	307777	262258	216352	231468	177743	-	-	-
pmp000674	Phillygenin	Lignans and Coumarins	Lignans	C21H24O6	373.16	337.14	372.157	[M+H]+	3	487-39-8	C22586	236141	109891	64522.9	133200	101380	105909	94527.1	148969	102408	-	C22586	-
Lmmp003530	3,4-Divanillyltetrahydrofuran	Lignans and Coumarins	Lignans	C20H24O5	345.17	137.06	344.162	[M+H]+	2	34730-78-4	-	157639	1.05519e+06	1.37313e+06	859023	807706	1.40364e+06	31527.9	31527.9	31527.9	-	-	-
mws4168	Praeruptorin A	Lignans and Coumarins	Coumarins	C21H22O7	387.14	227.07	386.137	[M+H]+	3	73069-25-7	-	2368.24	2368.24	2368.24	88436.6	163796	171305	507521	369775	309615	-	-	-
Lcfp033189	7-methoxy-5,6,8-trihydroxycoumarin-5-beta-glucopyranoside	Lignans and Coumarins	Coumarins	C16H18O11	387.09	225.04	386.085	[M+H]+	2	-	-	17509	17509	17509	17509	17509	17509	122086	87545.1	119086	-	-	-
Jmzn003632	Manglieside D	Lignans and Coumarins	Lignans	C26H34O11	521.2	329.14	522.21	[M-H]-	3	-	-	1.32637e+06	1.22892e+06	1.28625e+06	856659	1.19217e+06	890355	753579	804036	608860	-	-	-
Wbwn006953	Cagayanone A	Lignans and Coumarins	Lignans	C20H18O5	337.11	307.06	338.115	[M-H]-	3	-	-	663228	714854	753613	1.09307e+06	1.09425e+06	1.16866e+06	486444	474064	497151	-	-	-
Waln012680	7-O-Geranyl Umbelliferone	Lignans and Coumarins	Coumarins	C19H24O3	299.17	145.03	300.173	[M-H]-	1	-	-	568656	524100	583268	741693	748168	736243	950671	1.04109e+06	1.00987e+06	-	-	-
Xmbn007315	Chestnutlignansoide	Lignans and Coumarins	Lignans	C26H34O10	505.3	343.16	506.215	[M-H]-	3	-	-	1.80348e+06	1.90015e+06	1.83527e+06	1.60858e+06	1.58921e+06	1.62167e+06	300267	303902	297629	-	-	-
Wbwn009556	4-[4-(4-hydroxy-3-methoxyphenyl)-2,3-dimethylbutyl]-2-methoxyphenol	Lignans and Coumarins	Lignans	C20H26O4	329.17	314.15	330.183	[M-H]-	2	36469-60-0	-	743820	808660	716143	2.16941e+06	2.11254e+06	2.13814e+06	612385	578623	620022	-	-	-
Lmnn004130	Lappaol C	Lignans and Coumarins	Lignans	C30H34O10	553.21	505.19	554.215	[M-H]-	3	64855-00-1	C17686	1.27601e+06	1.24047e+06	1.2863e+06	6.1542e+06	4.87843e+06	5.60303e+06	1.07142e+06	1.05912e+06	1.78403e+06	-	C17686	-
Waln011512	7-O-Geranyl Esculetin	Lignans and Coumarins	Coumarins	C19H24O4	315.16	161.02	316.168	[M-H]-	1	-	-	2.06186e+06	1.91875e+06	2.18573e+06	2.50316e+06	2.48254e+06	2.40731e+06	3.38869e+06	3.70119e+06	3.70818e+06	-	-	-
Lmbn001162	Cichoriin*	Lignans and Coumarins	Coumarins	C15H16O9	339.07	177.02	340.079	[M-H]-	3	531-58-8	C09206	543085	581463	596665	389903	402357	406100	193962	139530	140406	-	C09206	-
Lmtn003024	Mansorin III	Lignans and Coumarins	Coumarins	C14H14O4	245.08	203.07	246.089	[M-H]-	3	-	-	4.5047e+06	4.50586e+06	4.6802e+06	4.81227e+06	4.45241e+06	4.99721e+06	3.44906e+06	3.60115e+06	3.73836e+06	-	-	-
Hmgn004139	Isohydroxymatairesinol	Lignans and Coumarins	Lignans	C20H22O7	373.13	329.05	374.137	[M-H]-	3	-	-	539046	536886	569413	831511	850455	788212	716579	688874	673058	-	-	-
Cmsn002383	(7S,8S-Threo-3',4,7,9-tetrahydroxy-3-methoxy-8-O-4'-neolignan-9'-O-rhamnoside	Lignans and Coumarins	Lignans	C25H34O11	509.2	179.07	510.21	[M-H]-	2	-	-	89942.2	183983	227215	56393.8	75386.1	60149.7	178148	319247	219900	-	-	-
Cmsn002371	Isolariciresinol-9-O-xyloside	Lignans and Coumarins	Lignans	C25H32O10	491.19	327.12	492.2	[M-H]-	2	-	-	1.36456e+06	2.9295e+06	2.15946e+06	4.26544e+06	4.63748e+06	3.24494e+06	833139	701709	739872	-	-	-
HJN047	Schizandriside*	Lignans and Coumarins	Lignans	C25H32O10	491.19	359.15	492.2	[M-H]-	1	71222-06-5	-	437979	436591	533093	738205	876499	987560	575829	654727	603935	-	-	-
pmn001572	Agrimonolide-6-O-glucoside	Lignans and Coumarins	Coumarins	C24H28O10	475.16	313.11	476.168	[M-H]-	3	126223-29-8	-	774876	695548	598159	969290	940803	1.00491e+06	1.05007e+06	979768	1.0697e+06	-	-	-
Wcdn006883	epipinoresinol*	Lignans and Coumarins	Lignans	C20H22O6	357.13	151.04	358.142	[M-H]-	3	18779-41-4	-	8.3259e+06	8.73938e+06	9.10139e+06	9.90565e+06	9.96984e+06	9.90392e+06	5.33662e+06	5.38108e+06	5.81602e+06	-	-	-
mws0097	Pinoresinol*	Lignans and Coumarins	Lignans	C20H22O6	357.13	151.04	358.142	[M-H]-	3	487-36-5	C05366	8.3259e+06	8.73938e+06	9.10139e+06	9.90565e+06	9.96984e+06	9.90392e+06	5.33662e+06	5.38108e+06	5.81602e+06	ko00999,ko01100,ko01110	C05366	-
Hmgn002833	4-Ketopinoresinol	Lignans and Coumarins	Lignans	C20H20O7	371.11	297.11	372.121	[M-H]-	3	66288-89-9	-	89711	98562	90011.5	116103	135757	128161	95562.2	101567	93442.5	-	-	-
Cmmn004667	massonianoside A*	Lignans and Coumarins	Lignans	C25H32O10	491.191	359.15	492.2	[M-H]-	1	623945-11-9	-	420130	398225	445411	712060	1.00584e+06	952160	603081	600300	572154	-	-	-
MWStz400	Nortrachelogenin	Lignans and Coumarins	Lignans	C20H22O7	373.13	179.07	374.137	[M-H]-	3	34444-37-6	C10725	98759.8	96586.2	85776.2	344693	285700	320039	242920	231160	234572	-	C10725	-
MWStz451	Clemaphenol A*	Lignans and Coumarins	Lignans	C20H22O6	357.13	151.04	358.142	[M-H]-	3	362606-60-8	C17808	7.58276e+06	8.30189e+06	8.96476e+06	1.01341e+07	1.02527e+07	9.64936e+06	5.30643e+06	5.40421e+06	5.73354e+06	-	C17808	-
MWStz427	Trachelogenin	Lignans and Coumarins	Lignans	C21H24O7	387.14	193.09	388.152	[M-H]-	2	34209-69-3	C10891	201665	180851	203551	397003	416479	375503	427557	426420	429114	-	C10891	-
Lmmn003041	Isolariciresinol-9'-O-xyloside*	Lignans and Coumarins	Lignans	C25H32O10	491.19	359.15	492.2	[M-H]-	1	97055-97-5	-	427836	381817	429577	757021	929440	835144	609342	642353	557253	-	-	-
Hmln002100	Nortrachelogenin-4-O-glucoside	Lignans and Coumarins	Lignans	C26H32O12	535.18	373.13	536.189	[M-H]-	2	33464-78-7	-	4.13349e+06	4.23182e+06	4.20629e+06	1.11741e+07	8.78837e+06	9.2324e+06	6.24055e+06	6.32997e+06	6.5767e+06	-	-	-
Lazn002030	Guaiacylglycerol-β-Guaiacyl Ether glucoside	Lignans and Coumarins	Lignans	C23H30O11	481.17	271.1	482.179	[M-H]-	1	-	-	1.072e+06	570620	645555	751267	1.04001e+06	718345	535848	346443	465679	-	-	-
Zmdn005358	Vladinol D	Lignans and Coumarins	Lignans	C20H22O7	373.13	313.1	374.137	[M-H]-	3	-	-	456701	613658	456813	3.39155e+06	3.07133e+06	3.32053e+06	1.05023e+06	895101	1.46365e+06	-	-	-
HJN083	Lariciresinol-4'-O-glucoside*	Lignans and Coumarins	Lignans	C26H34O11	521.2	359.15	522.21	[M-H]-	1	143663-00-7	-	1.36515e+06	1.31267e+06	1.0904e+06	684922	727197	605658	856419	777197	749117	-	-	-
Hmln003754	Icariside E5*	Lignans and Coumarins	Lignans	C26H34O11	521.2	359.15	522.21	[M-H]-	1	126176-79-2	-	1.42987e+06	1.18868e+06	1.29666e+06	764796	670828	720159	953935	914184	809344	-	-	-
Walbn05212	4-[(2R,3R)-3-[(3,4-dimethoxyphenyl)methyl]-4-hydroxy-2-(hydroxymethyl)butyl]benzene-1,2-diol	Lignans and Coumarins	Lignans	C20H26O6	361.17	165.06	362.173	[M-H]-	1	-	-	1.095e+06	1.27608e+06	1.42919e+06	1.6968e+06	1.38106e+06	1.81242e+06	830152	1.0205e+06	857751	-	-	-
Wbwn005757	(2r,3r,4s)-6-hydroxy-4-(4-hydroxy-3-methoxyphenyl)-7-methoxy-2,3-dimethyl-3,4-dihydro-2h-naphthalen-1-one	Lignans and Coumarins	Lignans	C20H22O5	341.14	311.09	342.147	[M-H]-	3	-	-	3.74741e+06	3.70053e+06	3.33241e+06	1.25829e+06	1.19028e+06	1.48818e+06	1.24163e+06	1.29984e+06	1.22786e+06	-	-	-
Lazn002213	1-(4-Hydroxy-3-methoxyphenyl)-2-[4-(1,2,3-trihydroxypropyl)-2-methoxyphenoxy]-1,3-propanediol	Lignans and Coumarins	Lignans	C20H26O9	409.15	165.06	410.158	[M-H]-	3	-	-	2.54698e+06	2.42766e+06	2.30414e+06	1.4549e+06	1.11913e+06	1.63638e+06	1.30874e+06	1.53812e+06	1.49161e+06	-	-	-
Wbmn00859	vitelignin A	Lignans and Coumarins	Lignans	C20H16O8	383.08	191.06	384.084	[M-H]-	3	-	-	1.04038e+06	426953	1.29498e+06	2.59025e+06	2.59196e+06	4.56104e+06	978288	666859	877243	-	-	-
HJN012	4,7,9,9'-Tetrahydroxy-3,3'-dimethoxy-8-O-4'-neolignan	Lignans and Coumarins	Lignans	C20H26O7	377.16	329.14	378.168	[M-H]-	3	-	-	547500	508382	422435	361302	378533	394012	435942	421069	439214	-	-	-
Cmsn002480	Secoisolariciresinol-9'-O-glucoside	Lignans and Coumarins	Lignans	C26H36O11	523.22	475.2	524.226	[M-H]-	1	63320-67-2	-	54855.6	43462.4	36120.2	44616.6	50463.4	33332.5	176584	175846	170452	-	-	-
Lmjn102210	Desmethylagrimonolide-6-O-glucoside	Lignans and Coumarins	Coumarins	C23H26O10	461.14	299.09	462.153	[M-H]-	1	1257408-55-1	-	1.73436e+06	1.74388e+06	1.73214e+06	4.04588e+06	3.55949e+06	3.97345e+06	838546	1.17382e+06	1.02097e+06	-	-	-
Lcsn000191	isatioxyneolignoside A	Lignans and Coumarins	Lignans	C24H30O13	525.16	167.03	526.169	[M-H]-	3	-	-	1.09099e+07	1.12777e+07	1.09532e+07	5.04615e+06	5.50019e+06	5.6965e+06	8.89914e+06	8.91684e+06	9.59324e+06	-	-	-
Cmyn001328	Daphnin*	Lignans and Coumarins	Coumarins	C15H16O9	339.07	177.02	340.079	[M-H]-	3	486-55-5	C01421	502456	506298	546190	388893	385966	470761	172122	197216	172618	-	C01421	MetMap133
mws1015	Esculin (6,7-Dihydroxycoumarin-6-O-glucoside)*	Lignans and Coumarins	Coumarins	C15H16O9	339.07	177.02	340.079	[M-H]-	3	531-75-9	C09264	502456	506298	546190	388893	385966	470761	172122	197216	172618	-	C09264	MetMap129
Wahsn05525	Secoisolariciresinol-sesquilignan	Lignans and Coumarins	Lignans	C30H38O10	557.24	361.17	558.246	[M-H]-	1	-	-	7.8386e+06	6.94034e+06	7.21649e+06	6.42587e+06	5.07831e+06	6.89805e+06	5.32969e+06	5.27717e+06	5.112e+06	-	-	-
Wahln03616	Demethylsyringin	Lignans and Coumarins	Lignans	C16H22O9	357.12	195.07	358.126	[M-H]-	1	-	-	732210	661149	633259	1.09363e+06	1.01903e+06	1.19271e+06	1.64574e+06	1.77259e+06	1.75909e+06	-	-	-
MWStz549	Lyoniside*	Lignans and Coumarins	Lignans	C27H36O12	551.21	389.16	552.221	[M-H]-	2	34425-25-7	-	354172	377489	282111	291603	248592	265121	319318	216088	243765	-	-	-
HJN054	Secoisolariciresinol-9'-O-xyloside	Lignans and Coumarins	Lignans	C25H34O10	493.21	361.16	494.215	[M-H]-	2	-	-	1.48522e+07	1.38396e+07	1.45333e+07	3.34784e+07	3.39729e+07	3.52183e+07	1.80498e+07	2.01347e+07	1.87161e+07	-	-	-
MWStz417	Isofraxidin-7-O-glucoside	Lignans and Coumarins	Coumarins	C17H20O10	383.1	221.04	384.106	[M-H]-	2	483-91-0	-	433601	509213	448449	649244	628827	607390	266168	310143	282109	-	-	-
Wahln04659	5'-Methoxylariciresinol xyloside*	Lignans and Coumarins	Lignans	C26H34O11	581.22	329.14	522.21	[M+CH3COO]-	3	-	-	155012	177771	507351	97094.3	85555.9	31991.1	119713	138551	597215	-	-	-
Lmmn002274	Isolariciresinol-9'-O-glucoside	Lignans and Coumarins	Lignans	C26H34O11	521.2	359.15	522.21	[M-H]-	1	63358-12-3	-	2.42616e+06	3.03225e+06	1.87312e+06	1.70292e+06	3.04984e+06	2.56524e+06	2.08955e+06	2.91717e+06	2.27344e+06	-	-	-
Cmsn001914	7R,8S-erythro-3',4,9,9'-tetrahydroxy-3-methoxy-8-O-4'-neolignan-7-O-glucopyr-anoside,	Lignans and Coumarins	Lignans	C25H34O12	525.2	179.07	526.205	[M-H]-	1	-	-	1.47839e+06	1.51509e+06	1.3785e+06	1.00422e+06	767219	1.31722e+06	1.24102e+06	1.86393e+06	1.67535e+06	-	-	-
Wahln04571	8-Hydroxypinoresinol 4-Glucoside*	Lignans and Coumarins	Lignans	C26H32O12	535.18	373.13	536.189	[M-H]-	2	-	-	3.40711e+06	2.714e+06	2.91559e+06	5.23619e+06	5.26982e+06	5.2753e+06	3.89193e+06	4.68675e+06	4.34138e+06	-	-	-
MWStz540	(-)-5'-Methoxyisolariciresinol 3alpha-O-beta-glucopyranoside	Lignans and Coumarins	Lignans	C27H36O12	551.21	389.16	552.221	[M-H]-	3	143236-03-7	-	334795	292668	326706	216962	164538	157687	199616	174477	206680	-	-	-
pmn001375	1-Hydroxypinoresinol-1-O-Glucoside*	Lignans and Coumarins	Lignans	C26H32O12	535.18	373.13	536.189	[M-H]-	2	81495-71-8	-	3.27723e+06	2.67768e+06	2.92073e+06	4.79084e+06	5.75326e+06	5.1132e+06	3.90745e+06	4.30269e+06	4.48428e+06	-	-	-
Cmsn002067	7S,8R-threo-3',9,9'-trihydroxy-3-methoxy-4',7-epoxy-neolignan-4-O-rhamnoside	Lignans and Coumarins	Lignans	C25H32O10	491.19	315.12	492.2	[M-H]-	1	-	-	5.60543e+06	4.73181e+06	6.54873e+06	4.94516e+06	6.93754e+06	8.57478e+06	5.49215e+06	1.0882e+07	4.03862e+06	-	-	-
Yamn004462	6-((4-(3-hydroxy-2-(4-(3-hydroxypropyl)-2-methylphenoxy)propoxy)-2-methoxyphenoxy)methyl)tetrahydro-2H-pyran-2,3,4,5-tetraol*	Lignans and Coumarins	Lignans	C26H36O11	523.22	361.16	524.226	[M-H]-	1	-	-	7.26167e+06	8.30843e+06	7.71595e+06	7.58145e+06	5.02864e+06	5.07771e+06	5.78417e+06	5.50403e+06	5.61577e+06	-	-	-
Lmtn003096	Secoisolariciresinol 4-O-glucoside*	Lignans and Coumarins	Lignans	C26H36O11	523.22	361.14	524.226	[M-H]-	1	-	-	7.26167e+06	8.30843e+06	7.71595e+06	7.58145e+06	5.02864e+06	5.07771e+06	5.78417e+06	5.50403e+06	5.61577e+06	-	-	-
Wahsn03824	(7R*,8R*)-3-Methoxy-3',4,7,9,9'-pentahydroxy-8,4'-oxyneolignan 4-xyloside	Lignans and Coumarins	Lignans	C24H32O11	495.19	167.07	496.195	[M-H]-	1	-	-	1.79481e+07	4.94088e+07	2.8009e+07	2.04684e+07	1.8677e+07	3.46936e+07	1.64139e+07	4.18084e+07	3.05303e+07	-	-	-
Wahln04469	Justiciresinol xyloside*	Lignans and Coumarins	Lignans	C26H34O11	581.22	329.14	522.21	[M+CH3COO]-	3	-	-	195719	107365	316701	81194.8	113910	84311.5	210021	228300	296360	-	-	-
Hmgn004693	8-Hydroxy-α-conidendrin	Lignans and Coumarins	Lignans	C20H20O7	371.11	327.03	372.121	[M-H]-	3	-	-	37947.1	22951.5	60722.7	42071.6	55625.8	49532.4	31207.8	56420.3	30743.9	-	-	-
pme2636	Enterodiol	Lignans and Coumarins	Lignans	C18H22O4	301.14	253.12	302.152	[M-H]-	3	80226-00-2	C18166	528282	492017	577319	341345	305374	333876	351836	287700	451512	-	C18166	-
Wahsn05900	4-(3-hydroxy-2-(4-(3-hydroxyprop-1-en-1-yl)phenoxy)propyl)-2-methoxyphenol glucoside	Lignans and Coumarins	Lignans	C25H32O10	491.19	179.07	492.2	[M-H]-	1	-	-	552720	410446	350513	96762.4	101807	111019	995356	1.08673e+06	918253	-	-	-
pmn001643	Isolariciresinol-9'-O-rhamnoside (Aviculin)	Lignans and Coumarins	Lignans	C26H34O10	505.21	359.15	506.215	[M-H]-	3	156765-33-2	-	146818	162133	145038	1.3623e+06	1.50131e+06	1.4001e+06	382676	432665	410989	-	-	-
Lmmn003020	Lyoniresinol	Lignans and Coumarins	Lignans	C22H28O8	419.17	404.15	420.178	[M-H]-	3	14464-90-5	-	322404	396202	333643	287700	243751	314368	383938	546545	311102	-	-	-
Labn005411	Urolignoside	Lignans and Coumarins	Lignans	C26H34O11	521.2	341.14	522.21	[M-H]-	2	131723-83-6	-	2.07271e+06	1.99491e+06	1.88782e+06	1.59239e+06	1.36242e+06	1.77342e+06	1.50568e+06	1.33443e+06	1.42454e+06	-	-	-
Lazn003893	Erythro-Guaiacylglycerol-β-Coniferyl Ether	Lignans and Coumarins	Lignans	C20H24O7	375.15	327.12	376.152	[M-H]-	3	890317-92-7	-	50198.1	83452.2	48120.6	66287.5	53286.9	54253.9	18866.9	57813.8	26682.3	-	-	-
Jmbn003306	Clemastanin A	Lignans and Coumarins	Lignans	C25H32O11	507.19	327.12	508.195	[M-H]-	3	172670-47-2	-	3.29499e+06	3.23614e+06	4.14393e+06	3.0746e+06	2.16916e+06	2.32036e+06	3.41193e+06	3.51114e+06	3.36456e+06	-	-	-
Wbwn008071	4-[3-(hydroxymethyl)-7-methoxy-5-(prop-2-en-1-yl)-2,3-dihydro-1-benzofuran-2-yl]-2-methoxyphenol	Lignans and Coumarins	Lignans	C20H22O5	341.14	326.11	342.147	[M-H]-	3	-	-	9791.49	34876.8	16586.8	45360.6	47421.8	41261.3	1958.3	1958.3	1958.3	-	-	-
MWSmce499	Secoisolariciresinol diglucoside	Lignans and Coumarins	Lignans	C32H46O16	685.27	523.22	686.279	[M-H]-	3	158932-33-3	C22584	151488	80846.5	123696	98744.8	90749	80145.1	100202	96936.7	143891	-	C22584	-
Lazn002951	Guaiacylglycerol-β-Guaiacyl Ether	Lignans and Coumarins	Lignans	C17H20O6	319.12	241.05	320.126	[M-H]-	2	7382-59-4	C21422	34491	15373.1	27104.7	19559.4	25798.9	12860.2	19006.9	19560.7	14601.2	-	C21422	-
Hmln101664	Nortrachelogenin-4'-O-gentiobioside	Lignans and Coumarins	Lignans	C32H42O17	697.24	535.18	698.242	[M-H]-	3	-	-	78338.3	81040.9	51036.4	168242	201263	172316	93999.8	122472	84679.7	-	-	-
pme3140	6-Hydroxy-4-methylcoumarin	Lignans and Coumarins	Coumarins	C10H8O3	175.04	147.05	176.047	[M-H]-	3	2373-31-1	-	89874.5	188301	69627.8	143272	166855	222114	144194	99544.9	136087	-	CM01419	MetMap133
Zbkn006749	Lappaol A	Lignans and Coumarins	Lignans	C30H32O9	535.2	381.13	536.205	[M-H]-	3	-	C17684	15124.8	18537.1	33193	138391	105824	141424	17988.2	10380.2	15172.7	-	C17684	-
MWSslk171	Nodakenin	Lignans and Coumarins	Coumarins	C20H24O9	407.13	227.07	408.142	[M-H]-	2	495-31-8	C09279	48923.6	13784.2	24357.3	42486	32488.5	42057.5	2756.83	2756.83	2756.83	-	C09279	-
Lmmn003748	Isolariciresinol	Lignans and Coumarins	Lignans	C20H24O6	359.15	180.08	360.157	[M-H]-	3	548-29-8	-	14133	15870.6	27676.3	11724.3	16531.3	10010.8	11734.1	8502.35	10843	-	-	-
Wbmn002185	6-Hydroxy-4-(4-hydroxy-3-methoxyphenyl)-7-methoxy-naphtho[2,3-c]furan-1,3-dione-1	Lignans and Coumarins	Lignans	C20H14O7	365.06	167.03	366.074	[M-H]-	3	-	-	2023.4	2023.4	2023.4	2023.4	2023.4	2023.4	12080.2	10117	25997.1	-	-	-
Lmmn001894	Demethylwedelolactone-3-O-glucoside	Lignans and Coumarins	Coumarins	C21H18O12	461.07	401.18	462.08	[M-H]-	3	-	-	25708.8	24147.2	41285.5	39603.7	45172.4	36375.5	4829.44	4829.44	4829.44	-	-	-
Lcrn000423	Myristargenol B	Lignans and Coumarins	Lignans	C20H26O5	345.17	330.15	346.178	[M-H]-	3	-	-	185961	170373	152314	166657	191247	155310	19751.2	19751.2	19751.2	-	-	-
MWSprf094	Tracheloside*	Lignans and Coumarins	Lignans	C27H34O12	549.2	387.14	550.205	[M-H]-	2	33464-71-0	-	83203	109121	70945.1	125788	45753.1	86968.2	9150.63	9150.63	9150.63	-	-	-
MWSmce439	Dihydrocoumarin	Lignans and Coumarins	Coumarins	C9H8O2	147.05	119.05	148.052	[M-H]-	3	119-84-6	C02274	29725.5	42605.5	43529.1	95996.2	65674.6	81741.4	90116.9	67119.5	77965.9	ko00999	C02274	MetMap133
Lmmn002260	5'-Methoxyisolariciresinol-9'-O-glucoside*	Lignans and Coumarins	Lignans	C27H36O12	551.21	389.17	552.221	[M-H]-	2	-	-	6964.53	6964.53	6964.53	6964.53	6964.53	6964.53	34822.7	95042.3	64001.2	-	-	-
Lmdn001925	Olivil-4'-O-glucoside	Lignans and Coumarins	Lignans	C26H34O12	537.2	375.15	538.205	[M-H]-	2	76880-93-8	-	13374.3	13374.3	13374.3	124990	84324	69809.6	116686	102816	66871.5	-	-	-
MWSHC2047	(+)-Syringaresinol O-beta-D-glucoside	Lignans and Coumarins	Lignans	C28H36O13	579.21	417.16	580.216	[M-H]-	3	7374-79-0	C10890	33356.7	15296.1	55915.7	36635.3	64606.5	30032	3059.21	3059.21	3059.21	-	C10890	-
Walbn03514	tetrahydrodehydrodiconiferyl alcohol glucoside	Lignans and Coumarins	Lignans	C26H36O11	523.22	361.16	524.226	[M-H]-	2	-	-	94666.9	94666.9	94666.9	709594	604915	473335	711386	686479	792536	-	-	-
MWSprf005	Mosloflavone; 5-Hydroxy-6,7-Dimethoxyflavone	Flavonoids	Flavones	C17H14O5	299.09	284.07	298.084	[M+H]+	2	740-33-0	-	1.21955e+07	1.25189e+07	1.2508e+07	1.36464e+07	1.43539e+07	1.44003e+07	1.42151e+07	1.35077e+07	1.39077e+07	-	CM00886	MetMap110
Layp006138	5-Hydroxy-3',4',7-trimethoxyflavone glucoside	Flavonoids	Flavones	C24H26O11	491.16	329.1	490.147	[M+H]+	2	-	-	914728	1.47931e+06	1.25185e+06	1.55261e+06	1.47043e+06	1.30721e+06	533541	519567	717799	-	-	-
Zjhp090604	5,7-dihydroxy-3-(4'-hydroxybenzyl)-chroman-4-one	Flavonoids	Other Flavonoids	C16H14O5	287.09	167.04	286.084	[M+H]+	1	-	-	4.86007e+06	6.18415e+06	4.81445e+06	2.26988e+06	2.31868e+06	2.14799e+06	620364	428266	666296	-	-	-
Zjhp090608	Polygonatone D	Flavonoids	Chalcones	C17H18O5	303.12	107.05	302.115	[M+H]+	3	-	-	2.23393e+06	2.79802e+06	2.12972e+06	3.05886e+06	2.44911e+06	1.92781e+06	1.88909e+06	1.80074e+06	1.7296e+06	-	-	-
Zahp008363	5-hydroxyl-3',4',7,8-tetramethoxyflavone*	Flavonoids	Flavones	C19H18O7	359.11	344.09	358.105	[M+H]+	1	13003-74-2	-	202150	212269	223096	100486	99548.7	85121.4	74762.9	53066.1	58337.1	-	-	-
pmp000169	Andrographidine D aglycone	Flavonoids	Flavanones	C19H18O7	359.11	329.06	358.105	[M+H]+	2	-	-	424167	533711	623087	283591	269329	251252	114330	103859	136904	-	-	-
Zmjp010694	5-Hydroxy-3,7,3',4'-tetramethoxyflavone (Retusin)*	Flavonoids	Flavonols	C19H18O7	359.11	344.09	358.105	[M+H]+	1	1245-15-4	-	202150	212269	223096	100486	99548.7	85121.4	74762.9	53066.1	58337.1	-	-	-
Zmjp008503	5-Hydroxy-4',6,7-trimethoxyflavone (Salvigenin)	Flavonoids	Flavones	C18H16O6	329.1	296.07	328.095	[M+H]+	1	19103-54-9	-	112236	140551	112824	377378	402957	355171	129604	85941.7	87529.6	-	-	-
pmp000163	Andrographidine E aglycone	Flavonoids	Flavones	C18H16O6	329.1	285.11	328.095	[M+H]+	2	1165-40-8	-	1.39835e+07	1.6348e+07	1.51676e+07	4.48397e+07	4.28534e+07	3.98017e+07	1.25137e+07	1.04404e+07	1.1879e+07	-	-	-
Lmsp011263	6-Hydroxy-5,7,4'-trimethoxyflavone	Flavonoids	Flavones	C18H16O6	329.1	268.08	328.095	[M+H]+	1	6938-19-8	C14985	458044	417015	392251	1.05795e+06	903195	994037	271188	243680	294287	-	C14985	MetMap121
mws0040	Chrysin	Flavonoids	Flavones	C15H10O4	255.07	153.02	254.058	[M+H]+	1	480-40-0	C10028	3.01256e+07	3.73209e+07	3.8767e+07	1.6127e+08	1.72824e+08	1.73958e+08	1.08209e+07	1.02563e+07	9.2405e+06	ko00941	C10028	MetMap110
MWSHY0089	Sakuranetin*	Flavonoids	Flavanones	C16H14O5	287.09	167.03	286.084	[M+H]+	3	2957-21-3	C09833	343783	840542	448682	227099	411791	254254	427085	462483	465471	ko00941,ko01110	C09833	MetMap110
Yamp007259	Helichrysetin	Flavonoids	Chalcones	C16H14O5	287.09	167.03	286.084	[M+H]+	3	62014-87-3	-	457616	748594	478457	331483	307206	306281	433679	505741	434972	-	-	-
Cmsp008121	7-O-Methylnaringenin*	Flavonoids	Flavanones	C16H14O5	287.09	167.03	286.084	[M+H]+	3	-	C09833	343783	840542	448682	227099	411791	254254	427085	462483	465471	ko00941,ko01110	C09833	-
mws0051	Acacetin*	Flavonoids	Flavones	C16H12O5	285.08	242.05	284.068	[M+H]+	1	480-44-4	C01470	1.91791e+06	1.99109e+06	2.27147e+06	9.42487e+06	9.10849e+06	1.00783e+07	1.28209e+06	909725	1.07517e+06	ko00944	C01470	MetMap121
MWSHY0047	5,7,4'-Trimethoxyflavone	Flavonoids	Flavones	C18H16O5	313.11	269.08	312.1	[M+H]+	3	5631-70-9	-	354307	351579	334705	346585	330418	332904	418499	169689	218610	-	CM01061	MetMap120
Lagp008266	Anhydrotuberosin	Flavonoids	Isoflavones	C20H16O4	321.11	147.04	320.105	[M+H]+	3	41347-49-3	-	3.86942e+06	3.52928e+06	4.456e+06	2.24938e+06	2.14629e+06	2.28314e+06	614184	929042	601179	-	-	-
MWS20189	Tectorigenin*	Flavonoids	Isoflavones	C16H12O6	301.071	286.046	300.063	[M+H]+	3	548-77-6	C10534	2.1847e+06	2.81485e+06	2.96345e+06	1.19543e+07	1.29002e+07	1.26855e+07	1.80676e+06	1.86299e+06	1.83615e+06	-	C10534	MetMap112
Lmjp004941	3,5,4'-Trihydroxy-7-methoxyflavone (Rhamnocitrin)*	Flavonoids	Flavonols	C16H12O6	301.07	286.05	300.063	[M+H]+	3	569-92-6	C17059	2.1847e+06	2.81485e+06	2.96345e+06	1.19543e+07	1.29002e+07	1.26855e+07	1.80676e+06	1.86299e+06	1.83615e+06	-	C17059	MetMap114
MWSHY0069	Hispidulin (5,7,4'-Trihydroxy-6-methoxyflavone)*	Flavonoids	Flavones	C16H12O6	301.07	286.05	300.063	[M+H]+	3	1447-88-7	C10058	2.1847e+06	2.81485e+06	2.96345e+06	1.19543e+07	1.29002e+07	1.26855e+07	1.80676e+06	1.86299e+06	1.83615e+06	-	C10058	MetMap110
Zmjp004795	5,6,7-Trihydroxy-8-methoxyflavone*	Flavonoids	Flavones	C16H12O6	301.07	286.05	300.063	[M+H]+	3	-	-	2.1847e+06	2.81485e+06	2.96345e+06	1.19543e+07	1.29002e+07	1.26855e+07	1.80676e+06	1.86299e+06	1.83615e+06	-	CM00893	MetMap110
Lmjp005871	Penduletin (5,4'-Dihydroxy-3,6,7-trimethoxyflavone)	Flavonoids	Flavonols	C18H16O7	345.1	312.06	344.09	[M+H]+	3	569-80-2	-	5.11181e+06	6.51086e+06	5.72688e+06	5.06988e+06	5.35258e+06	5.16467e+06	1.54581e+06	1.56391e+06	1.40208e+06	-	-	-
mws1474	5,7-Dihydroxy-3',4',5'-trimethoxyflavone	Flavonoids	Flavones	C18H16O7	345.1	284.07	344.09	[M+H]+	3	18103-42-9	C19807	4.16952e+06	5.8126e+06	4.6601e+06	4.66064e+06	4.47813e+06	4.80684e+06	1.2426e+06	1.18306e+06	1.28833e+06	-	C19807	MetMap121
Cmxp005429	Okanin	Flavonoids	Chalcones	C15H12O6	289.07	153.02	288.063	[M+H]+	3	484-76-4	C08724	281671	176602	415681	793858	670759	753315	612166	515219	646009	-	C08724	MetMap126
pma0253	O-MethylChrysoeriol-5-O-glucoside	Flavonoids	Flavones	C23H24O11	477.139	315.086	476.132	[M+H]+	3	-	-	1.97569e+06	2.31444e+06	2.03205e+06	7.00738e+06	6.66999e+06	6.90515e+06	1.40818e+06	1.61711e+06	1.62535e+06	-	-	-
pmp000006	Eupatilin*	Flavonoids	Flavones	C18H16O7	345.1	330.07	344.09	[M+H]+	1	22368-21-4	C10040	201892	324404	277658	387465	327108	309874	65176.3	73950.9	74718	-	C10040	-
Smbp005175	Rivularin*	Flavonoids	Flavones	C18H16O7	345.09	330.07	344.09	[M+H]+	1	70028-59-0	-	201892	324404	277658	387465	327108	309874	65176.3	73950.9	74718	-	CM01084	MetMap120
HJAP058	5,6,7,4'-Tetramethoxyflavanone	Flavonoids	Flavanones	C19H20O6	345.1	284.07	344.126	[M+H]+	2	2569-77-9	C15118	806028	970380	931118	902958	898314	886773	249540	290213	197537	-	C15118	-
Zmap009745	3,7,4'-Tri-O-methylquercetin*	Flavonoids	Flavonols	C18H16O7	345.1	330.07	344.09	[M+H]+	3	572-32-7	C04444	5.19546e+06	5.16218e+06	4.98013e+06	3.88781e+06	3.52651e+06	3.74238e+06	2.59616e+06	2.01712e+06	2.13344e+06	ko00944,ko01110	C04444	MetMap124
Wbtp006612	2,3,6,8-tetrahydroxy-1-(3-methylbut-2-en-1-yl)xanthen-9-one	Flavonoids	Other Flavonoids	C18H16O6	329.1	273.04	328.095	[M+H]+	3	-	-	388605	370288	462922	916311	1.04537e+06	1.03447e+06	212750	215501	203165	-	-	-
Lmsp009300	5,6-Dihydroxy-7,4'-dimethoxyflavone (Ladanein)	Flavonoids	Flavones	C17H14O6	315.09	272.07	314.079	[M+H]+	1	10176-71-3	-	865670	1.16476e+06	800148	5.05183e+06	4.65038e+06	4.96856e+06	715133	581164	631465	-	CM00941	MetMap121
Smhp011040	ageconyflavone B	Flavonoids	Flavones	C19H18O7	359.11	298.08	358.105	[M+H]+	3	-	-	721181	772934	782698	393146	375887	415515	240039	210410	241494	-	CM00956	MetMap121
MWSHY0051	Kaempferol	Flavonoids	Flavonols	C15H10O6	287.06	153.02	286.048	[M+H]+	2	520-18-3	C05903	2.01671e+07	2.34303e+07	2.20018e+07	1.71019e+07	1.89739e+07	1.47072e+07	2.44042e+07	2.12726e+07	2.04817e+07	ko00941,ko00944,ko01100,ko01110	C05903	-
Zbsp005521	Chrysin-5-O-glucoside (Toringin)*	Flavonoids	Flavones	C21H20O9	417.12	255.07	416.111	[M+H]+	1	1329-10-8	-	734597	724539	466995	1.48088e+06	1.35519e+06	1.22329e+06	1.08753e+07	1.04756e+07	1.08298e+07	-	CM00873	MetMap110
Lamp009626	3-(4-methoxybenzylidene)-5,7-dihydroxy-6-methoxychroman-4-one glucoside	Flavonoids	Other Flavonoids	C24H26O11	491.17	329.1	490.147	[M+H]+	2	-	-	7.17668e+06	7.79637e+06	6.87335e+06	8.21684e+06	8.05652e+06	8.0067e+06	3.51155e+06	3.63708e+06	3.31818e+06	-	-	-
Lalp005356	4',7-dihydroxy-5-methoxy-8-methylflavanone	Flavonoids	Flavanones	C17H16O5	301.11	181.05	300.1	[M+H]+	2	-	-	817826	738969	673645	924527	784768	731777	519834	499452	559104	-	-	-
pmp000172	5,2'-Dihydroxy-7,8-dimethoxyflavone glucoside*	Flavonoids	Flavones	C23H24O11	477.14	315.08	476.132	[M+H]+	1	-	-	2.26405e+06	3.19789e+06	2.24657e+06	4.82288e+06	6.07446e+06	4.2467e+06	1.8662e+06	2.41087e+06	2.62918e+06	-	CM01085	MetMap120
MWStz583	5-Hydroxy-7,3',4'-trimethoxyflavone	Flavonoids	Flavones	C18H16O6	329.11	313.07	328.095	[M+H]+	1	29080-58-8	-	249659	267602	261502	759620	785246	703944	169640	178725	202529	-	-	-
Zmjp006741	Chrysosplenoside E*	Flavonoids	Flavonols	C25H28O13	537.16	375.12	536.153	[M+H]+	1	-	-	5.53741e+06	4.7193e+06	4.90948e+06	2.3057e+06	2.26475e+06	2.30936e+06	943427	735548	791004	-	-	-
Zmjp006451	3,6,7,4'-tetramethylquercetagetin 3'-O-beta-D-glucoside*	Flavonoids	Flavonols	C25H28O13	537.16	375.11	536.153	[M+H]+	1	-	-	5.32509e+06	4.87751e+06	4.81911e+06	2.25911e+06	2.17269e+06	2.18025e+06	904835	859182	831637	-	-	-
Zmjp004311	Chrysosplenetin-4'-O-glucoside*	Flavonoids	Flavonols	C25H28O13	537.16	375.11	536.153	[M+H]+	1	23279-19-8	-	5.32509e+06	4.87751e+06	4.81911e+06	2.25911e+06	2.17269e+06	2.18025e+06	904835	859182	831637	-	-	-
Hmhp005846	Tenaxin I*	Flavonoids	Flavones	C18H16O7	345.09	330.07	344.09	[M+H]+	1	86926-52-5	-	273025	269800	248050	378974	285397	322961	69693	70948.4	66986.5	-	-	-
Zmhp004065	7,8-Dihydroxy-5,6,4'-trimethoxyflavone*	Flavonoids	Flavones	C18H16O7	345.1	330.07	344.09	[M+H]+	1	-	-	273025	269800	248050	378974	285397	322961	69693	70948.4	66986.5	-	CM01064	MetMap120
Zblp007976	5,7,4'-Trihydroxyflavone	Flavonoids	Flavones	C15H12O5	273.08	137.02	272.068	[M+H]+	3	-	-	816422	1.24754e+06	1.36222e+06	917812	837253	863982	959924	1.0507e+06	943150	-	-	-
Zbsp005869	7,4'-Dihydroxy-3,5,3'-trimethoxyflavone*	Flavonoids	Flavonols	C18H16O7	345.1	315.05	344.09	[M+H]+	2	13459-09-1	-	57088.6	73735.7	67019.1	72291	107352	68706.8	13784.3	15333.4	16455.7	-	-	-
Zmjp005959	Chrysosplenoside A*	Flavonoids	Flavonols	C24H26O13	523.15	361.1	522.137	[M+H]+	1	-	-	1.86277e+06	1.76587e+06	1.74866e+06	1.46797e+06	1.50074e+06	1.23497e+06	249004	273924	287029	-	-	-
Lmgp004784	Apiferol	Flavonoids	Flavanols	C15H14O5	275.09	139.04	274.084	[M+H]+	3	55167-29-8	-	594417	452094	782196	784311	1.04828e+06	751639	1.16788e+06	1.3482e+06	1.13572e+06	-	CM01820	MetMap140,MetMap141
Lmdp007354	5,4'-Dihydroxy-7,8-dimethoxyflavanone*	Flavonoids	Flavanones	C17H16O6	317.103	197.043	316.095	[M+H]+	3	-	-	2.85912e+07	4.06455e+07	2.44586e+07	2.80808e+07	2.78536e+07	2.15383e+07	1.50473e+07	2.6937e+07	2.33956e+07	-	-	-
Lmsp009013	4',6-Dihydroxy-5,7-dimethoxyflavanone*	Flavonoids	Flavanones	C17H16O6	317.1	197.05	316.095	[M+H]+	3	6951-57-1	C14969	2.85912e+07	4.06455e+07	2.44586e+07	2.80808e+07	2.78536e+07	2.15383e+07	1.50473e+07	2.6937e+07	2.33956e+07	-	C14969	-
Zmhp003514	6,7,8-Tetrahydroxy-5-methoxyflavone*	Flavonoids	Flavones	C16H12O6	301.07	286.05	300.063	[M+H]+	3	-	-	2.19592e+06	2.61362e+06	2.98912e+06	1.2941e+07	1.38857e+07	1.3219e+07	2.03503e+06	1.98781e+06	2.21194e+06	-	CM01057	MetMap120
Cmsp004086	Dihydrokaempferide	Flavonoids	Flavanonols	C16H14O6	303.09	229.08	302.079	[M+H]+	3	137225-59-3	-	5.34268e+06	3.18644e+06	6.99109e+06	3.66645e+06	9.53191e+06	4.5873e+06	7.23558e+06	8.67023e+06	3.72729e+06	-	CM00456	MetMap114
Wbtp004753	1,2,3,7,8-pentahydroxy-6-methylanthracene-9,10-dione*	Flavonoids	Other Flavonoids	C15H10O7	303.05	229.05	302.043	[M+H]+	1	-	-	4.29085e+06	4.18013e+06	5.48397e+06	4.14057e+06	7.05767e+06	4.1936e+06	5.08601e+06	5.02024e+06	4.08993e+06	-	-	-
pme3285	Afzelechin	Flavonoids	Flavanols	C15H14O5	275.09	139.04	274.084	[M+H]+	2	2545-00-8	C09320	6.31645e+06	5.2253e+06	6.13719e+06	5.94735e+06	5.75573e+06	7.27715e+06	8.30556e+06	7.79843e+06	6.89969e+06	ko00941,ko01110	C09320	MetMap140
Lmgp009246	5-Hydroxy-7,3',4'-trimethoxyflavanone	Flavonoids	Flavanones	C18H18O6	331.118	167.034	330.11	[M+H]+	3	-	-	177834	239089	186328	106271	148844	93236.8	234750	266294	179403	-	-	-
zjzp122816	5,7,2',4'-Tetrahydroxyflavanone	Flavonoids	Flavanones	C15H12O6	289.07	215.07	288.063	[M+H]+	3	-	-	4.7983e+07	5.57065e+07	4.69057e+07	3.03213e+07	2.9811e+07	3.12204e+07	1.86304e+07	1.84298e+07	2.17281e+07	-	-	-
Hmcp002298	Limocitrin-3-O-arabinoside	Flavonoids	Flavonols	C22H22O12	479.12	347.07	478.111	[M+H]+	3	-	-	278516	378132	349033	336151	376727	366630	53267.5	54813.8	194177	-	CM01003	MetMap124
MWSHY0124	Pinocembrin	Flavonoids	Flavanones	C15H12O4	257.08	153.02	256.074	[M+H]+	2	480-39-7	C09827	539888	463355	541071	829676	918891	965143	279781	276318	286391	ko00941	C09827	-
Smdp007779	8-Demethylfarrerol	Flavonoids	Flavanones	C16H14O5	287.09	167.03	286.084	[M+H]+	2	-	-	5.44248e+06	6.80959e+06	5.58527e+06	2.58286e+06	2.60271e+06	2.58418e+06	825594	624197	740538	-	-	-
MWSslk237	Homoplantaginin*	Flavonoids	Flavones	C22H22O11	463.13	301.07	462.116	[M+H]+	1	17680-84-1	C17762	2.12332e+07	1.512e+07	1.89293e+07	4.59186e+07	3.25567e+07	5.31026e+07	2.58437e+07	2.00705e+07	2.26905e+07	-	C17762	MetMap110
Hmmp004965	Diosmetin-7-O-glucoside*	Flavonoids	Flavones	C22H22O11	463.12	301.07	462.116	[M+H]+	1	20126-59-4	-	2.12332e+07	1.512e+07	1.89293e+07	4.59186e+07	3.25567e+07	5.31026e+07	2.58437e+07	2.00705e+07	2.26905e+07	-	CM00980	MetMap121
Lmjp003655	6-C-MethylKaempferol-3-glucoside	Flavonoids	Flavonols	C22H22O11	463.12	301.08	462.116	[M+H]+	1	-	-	2.12332e+07	1.512e+07	1.89293e+07	4.59186e+07	3.25567e+07	5.31026e+07	2.58437e+07	2.00705e+07	2.26905e+07	-	CM00467	MetMap113
pmp000579	Diosmetin-7-O-galactoside*	Flavonoids	Flavones	C22H22O11	463.12	301.07	462.116	[M+H]+	1	-	-	2.12332e+07	1.512e+07	1.89293e+07	4.59186e+07	3.25567e+07	5.31026e+07	2.58437e+07	2.00705e+07	2.26905e+07	-	CM00979	MetMap121
Lmsp008443	3,3',5-Trihydroxy-4',7-dimethoxyflavanone	Flavonoids	Flavanones	C17H16O7	333.1	167.03	332.09	[M+H]+	3	-	-	729881	945461	984146	1.16513e+06	660972	974136	1.26699e+06	789512	1.14518e+06	-	-	-
Lahp004593	Rhamnazin 3-O-β-D-glucopyranoside(Flavoyadorinin A)*	Flavonoids	Flavonols	C23H24O12	493.13	331.08	492.127	[M+H]+	3	20486-38-8	-	1.89337e+06	2.07963e+06	4.00711e+06	7.66134e+06	8.44274e+06	5.4486e+06	1.42135e+06	2.3214e+06	1.87213e+06	-	-	-
Hmgp002238	Jaceoside*	Flavonoids	Flavones	C23H24O12	493.14	331.08	492.127	[M+H]+	3	25474-11-7	-	1.89337e+06	2.07963e+06	4.00711e+06	7.66134e+06	8.44274e+06	5.4486e+06	1.42135e+06	2.3214e+06	1.87213e+06	-	-	-
MWS20147	Luteolin-3'-O-glucoside	Flavonoids	Flavones	C21H20O11	449.11	287.06	448.101	[M+H]+	2	5154-41-6	-	7.00313e+06	6.37451e+06	7.85984e+06	1.0642e+07	1.29104e+07	1.04767e+07	2.92417e+07	3.68478e+07	2.58429e+07	-	CM00159	MetMap105
Hajp009554	2',4'-Dihydroxy-4-methoxychalcone	Flavonoids	Chalcones	C16H14O4	271.1	167.03	270.089	[M+H]+	2	19309-14-9	-	1.80721e+06	1.78452e+06	1.60068e+06	8.51791e+06	8.45177e+06	8.32851e+06	2.01167e+06	1.59187e+06	2.56731e+06	-	-	-
Lmdp003808	Azaleatin	Flavonoids	Flavonols	C16H12O7	317.07	302.04	316.058	[M+H]+	2	529-51-1	C10022	241217	264573	330620	144742	386690	177431	217124	250755	193920	-	C10022	MetMap117
Zmzp004111	Selagin	Flavonoids	Flavones	C16H12O7	317.06	302.04	316.058	[M+H]+	2	-	C19739	7.40892e+07	6.62132e+07	9.53735e+07	5.90046e+07	8.19283e+07	5.35867e+07	5.95054e+07	7.76411e+07	5.34383e+07	-	C19739	MetMap120
Ladp004214	Kumatakenin rhamnoside	Flavonoids	Flavonols	C23H24O10	461.14	315.09	460.137	[M+H]+	2	-	-	1.35298e+06	978913	1.43579e+06	1.28367e+06	782849	981338	533246	890010	438118	-	-	-
Lcyp000673	Prudomestin	Flavonoids	Flavonols	C17H14O7	331.08	315.05	330.074	[M+H]+	3	3443-28-5	-	471421	595306	469588	1.26333e+06	1.21149e+06	1.22013e+06	245257	201340	263286	-	-	-
Wagp010987	Gossypetin 3,7,8,3',4'-pentamethyl ether*	Flavonoids	Flavonols	C20H20O8	389.12	359.08	388.116	[M+H]+	2	-	-	279588	293488	305673	80330.9	73297.6	131250	58650.9	34691.1	44383.7	-	-	-
HJAP056	Dihydroxy-dimethoxyflavone-7-O-glucoside*	Flavonoids	Flavonols	C23H24O11	477.14	315.1	476.132	[M+H]+	1	-	-	5.17504e+06	3.26641e+06	3.98137e+06	9.60008e+06	9.95635e+06	1.0174e+07	3.41656e+06	4.40957e+06	4.59356e+06	-	-	-
Lmmp002795	Pratensein-7-O-glucoside	Flavonoids	Isoflavones	C22H22O11	463.12	301.07	462.116	[M+H]+	3	36191-03-4	-	415626	565289	379089	1.15368e+06	1.2649e+06	1.40211e+06	244925	238630	263125	-	CM00438	MetMap112
Lmyp005841	Chrysin-7-O-glucoside*	Flavonoids	Flavones	C21H20O9	417.12	255.06	416.111	[M+H]+	1	31025-53-3	-	547319	664068	668311	1.20567e+06	2.06492e+06	1.15655e+06	7.8183e+06	1.11884e+07	1.36032e+07	-	CM00874	MetMap110
Lcfp007308	5,7-Dihydroxy-3,3',4',5'-tetramethoxyflavone*	Flavonoids	Flavones	C19H18O8	375.11	345.06	374.1	[M+H]+	1	14585-04-7	-	98826.4	159234	167942	126736	103202	134305	40176	24157.5	41989.3	-	-	-
Yalp003535	4-Hydroxy-4',2,6-trimethoxydihydrochalcone	Flavonoids	Chalcones	C18H20O5	317.14	151.07	316.131	[M+H]+	1	-	-	1.24745e+07	1.45314e+07	1.57024e+07	9.45845e+06	9.10423e+06	9.39316e+06	1.90196e+07	1.41649e+07	1.74188e+07	-	-	-
mws1175	Pinostrobin	Flavonoids	Flavanones	C16H14O4	271.1	167.03	270.089	[M+H]+	2	480-37-5	C16419	1.11951e+06	1.13635e+06	1.13071e+06	470285	424995	433228	1.89546e+06	2.48527e+06	2.58918e+06	ko00941	C16419	-
Lmzp004885	Tricin	Flavonoids	Flavones	C17H14O7	331.08	315.05	330.074	[M+H]+	3	520-32-1	C10193	411515	493994	424520	1.23946e+06	1.29667e+06	1.17589e+06	198169	235055	212534	-	C10193	-
MWSHY0054	Eupatorin; 3',5-Dihydroxy-4',6,7-Trimethoxyflavone*	Flavonoids	Flavones	C18H16O7	345.1	312.06	344.09	[M+H]+	1	855-96-9	-	5.05374e+06	6.77949e+06	5.38035e+06	5.48036e+06	5.27508e+06	5.55926e+06	1.57165e+06	1.24346e+06	1.34508e+06	-	CM00952	MetMap121
Wagp008723	Mikanin*	Flavonoids	Flavonols	C18H16O7	345.1	312.06	344.09	[M+H]+	1	4324-53-2	-	4.76681e+06	6.70353e+06	5.48941e+06	5.18737e+06	5.1138e+06	5.56445e+06	1.44644e+06	1.4362e+06	1.41423e+06	-	-	-
Lahp004580	rhamnazin-3-O-β-D-apiosyl-(1→2)-O-β-D-glucoside	Flavonoids	Flavonols	C28H32O16	625.178	331.084	624.169	[M+H]+	3	-	-	49377.9	55924	57661.1	70707.6	39633.3	37925.5	31911.5	28151	49396.4	-	CM00876	MetMap124
HJAP007	Syringetin-3-O-(6''-Acetyl)glucoside	Flavonoids	Flavonols	C25H26O14	551.14	347.08	550.132	[M+H]+	2	-	-	164098	227588	846238	531550	275993	984448	165630	168441	503647	-	CM00829	MetMap109
Zmmp009258	Naringenin-4',7-dimethyl ether	Flavonoids	Flavanones	C17H16O5	301.11	167.04	300.1	[M+H]+	3	29424-96-2	-	2.31443e+07	2.19619e+07	1.94175e+07	2.05253e+07	1.97404e+07	1.91585e+07	1.57236e+07	1.62261e+07	1.60555e+07	-	-	-
Zbsp002100	Catechin-(4α→8)-gallocatechin	Flavonoids	Flavanols	C30H26O13	595.14	289.07	594.137	[M+H]+	1	-	-	2.36598e+06	1.08262e+06	1.74608e+06	1.44728e+06	1.7298e+06	1.306e+06	588074	576556	926444	-	CM01811	MetMap140
Lmyp006086	Prunetin-5-O-glucoside*	Flavonoids	Isoflavones	C22H22O10	447.13	285.07	446.121	[M+H]+	3	-	-	336932	419128	297340	685324	884125	718676	222861	303282	219484	-	CM00426	MetMap112
Zasp005752	Kaempferol-3-(2''-acetylrhamnoside)	Flavonoids	Flavonols	C23H22O11	475.12	287.06	474.116	[M+H]+	3	-	-	240076	208068	141344	176459	171522	244653	127980	99775.6	73576.2	-	-	-
MWSHY0106	Myricetin	Flavonoids	Flavonols	C15H10O8	319.04	273.04	318.038	[M+H]+	3	529-44-2	C10107	2.74858e+06	2.7049e+06	2.19319e+06	2.32522e+06	2.08923e+06	2.23605e+06	1.56837e+06	1.83162e+06	1.68581e+06	ko00941,ko00944,ko01110	C10107	-
Lmmp003271	Gossypetin 8-O-glucoside	Flavonoids	Flavonols	C21H20O13	481.1	319.05	480.09	[M+H]+	3	652-78-8	C10051	2.39772e+06	1.6933e+06	2.9593e+06	971098	1.31023e+06	1.29862e+06	1.64176e+06	1.10671e+06	1.07949e+06	-	C10051	-
Hmhp005160	Rehderianin I*	Flavonoids	Flavones	C17H14O7	331.07	316.05	330.074	[M+H]+	1	90965-30-3	-	48310.4	86257.6	53697.5	125228	84514.6	119095	15430.9	38754.1	18083.1	-	-	-
Wagp009375	3,5,6,7-Tetramethoxyflavone*	Flavonoids	Flavonols	C19H18O6	343.12	313.07	342.11	[M+H]+	2	75413-07-9	-	571633	780583	659840	599142	587917	554374	219868	160394	194082	-	-	-
MWSHC2050	4',5,6,7-Tetramethoxyflavone*	Flavonoids	Flavones	C19H18O6	343.12	313.07	342.11	[M+H]+	2	1168-42-9	C14472	571633	780583	659840	599142	587917	554374	219868	160394	194082	-	C14472	MetMap121
Zbsp003661	Pachypodol	Flavonoids	Flavones	C18H16O7	345.1	315.05	344.09	[M+H]+	3	33708-72-4	C10117	935541	731359	701089	371550	391775	430606	205341	245940	325714	-	C10117	MetMap116,MetMap117
MWSslk002	Sophoricoside	Flavonoids	Isoflavones	C21H20O10	433.11	271.06	432.106	[M+H]+	3	152-95-4	-	509188	455230	362604	711178	519614	498244	1.7231e+06	1.45041e+06	1.83492e+06	-	-	-
Lmgp004731	Genistein-7-O-galactoside	Flavonoids	Isoflavones	C21H20O10	433.11	271.06	432.106	[M+H]+	3	-	-	462757	374350	332278	594169	569310	500427	1.42855e+06	1.6354e+06	1.47373e+06	-	CM00422	MetMap112
MWSHY0189	Apigenin 7-O-beta-D-glucoside*	Flavonoids	Flavones	C21H20O10	433.11	271.07	432.106	[M+H]+	1	578-74-5	C04608	462757	374350	332278	594169	569310	500427	1.42855e+06	1.6354e+06	1.47373e+06	ko00944	C04608	-
MWS20148	Apigenin-4'-O-glucoside*	Flavonoids	Flavones	C21H20O10	433.11	271.07	432.106	[M+H]+	1	-	-	462757	374350	332278	594169	569310	500427	1.42855e+06	1.6354e+06	1.47373e+06	-	-	-
MWS20151	Apigenin*	Flavonoids	Flavones	C15H10O5	271.06	153.02	270.053	[M+H]+	3	520-36-5	C01477	1.42881e+06	1.61712e+06	1.65161e+06	9.71619e+06	1.08249e+07	1.04339e+07	1.32097e+06	1.55617e+06	1.52489e+06	ko00941,ko00943,ko00944,ko01100,ko01110	C01477	MetMap120
[truncated: 983 more rows]
